# Supplementary material
Source: Springer Nature journal article supplement (https://www.springermedizin.de/resource/supplementary/12894_2006_80_MOESM3_ESM.pdf/9513878)

# Participant number= 101

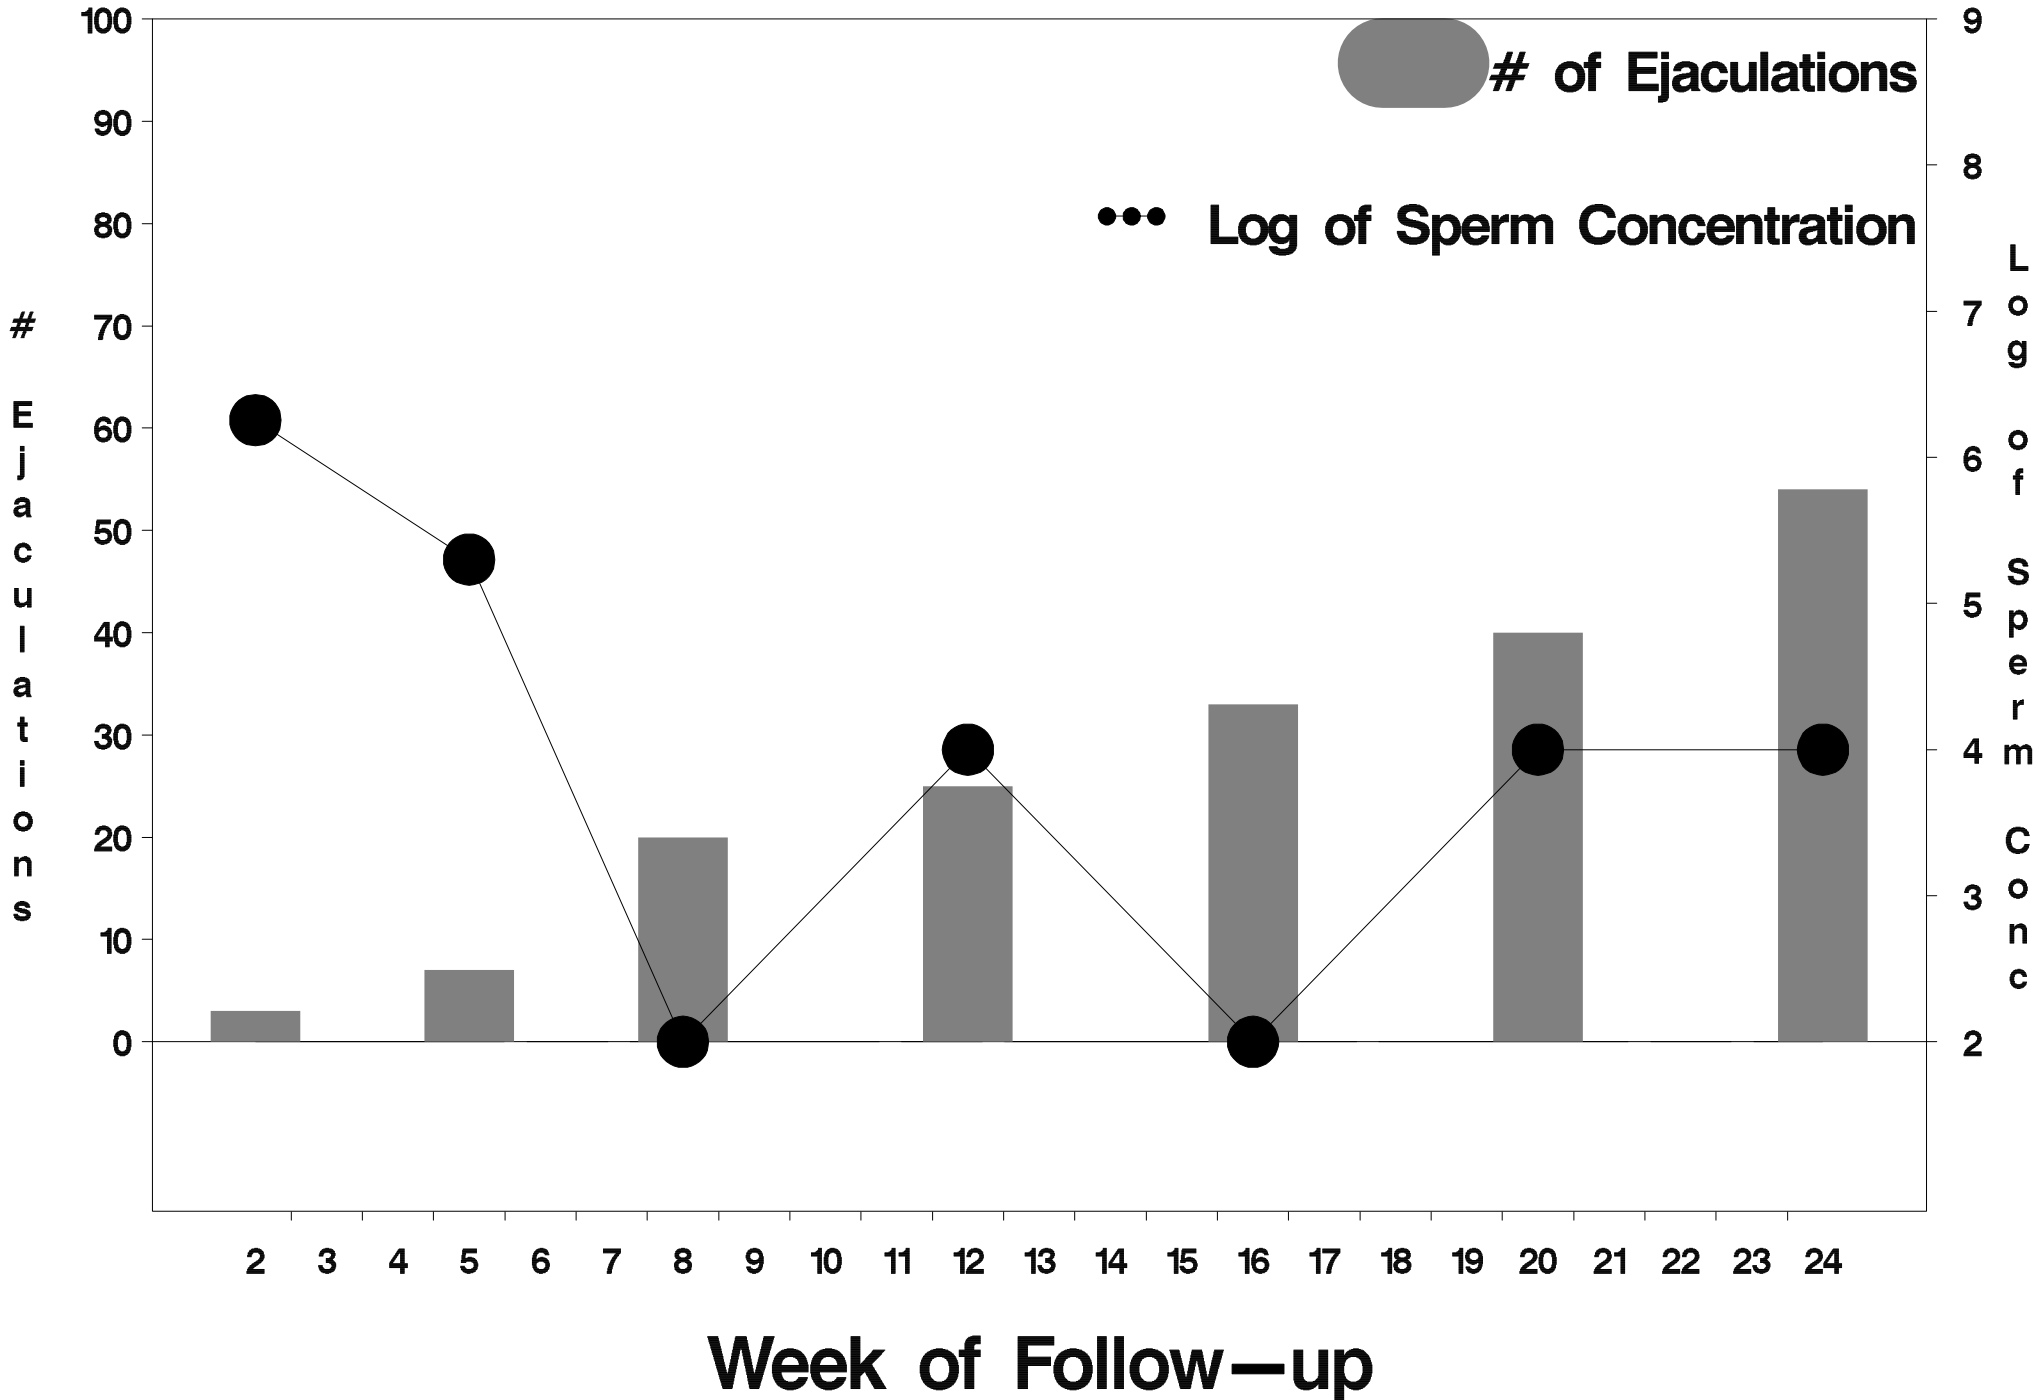

# Participant number= 102

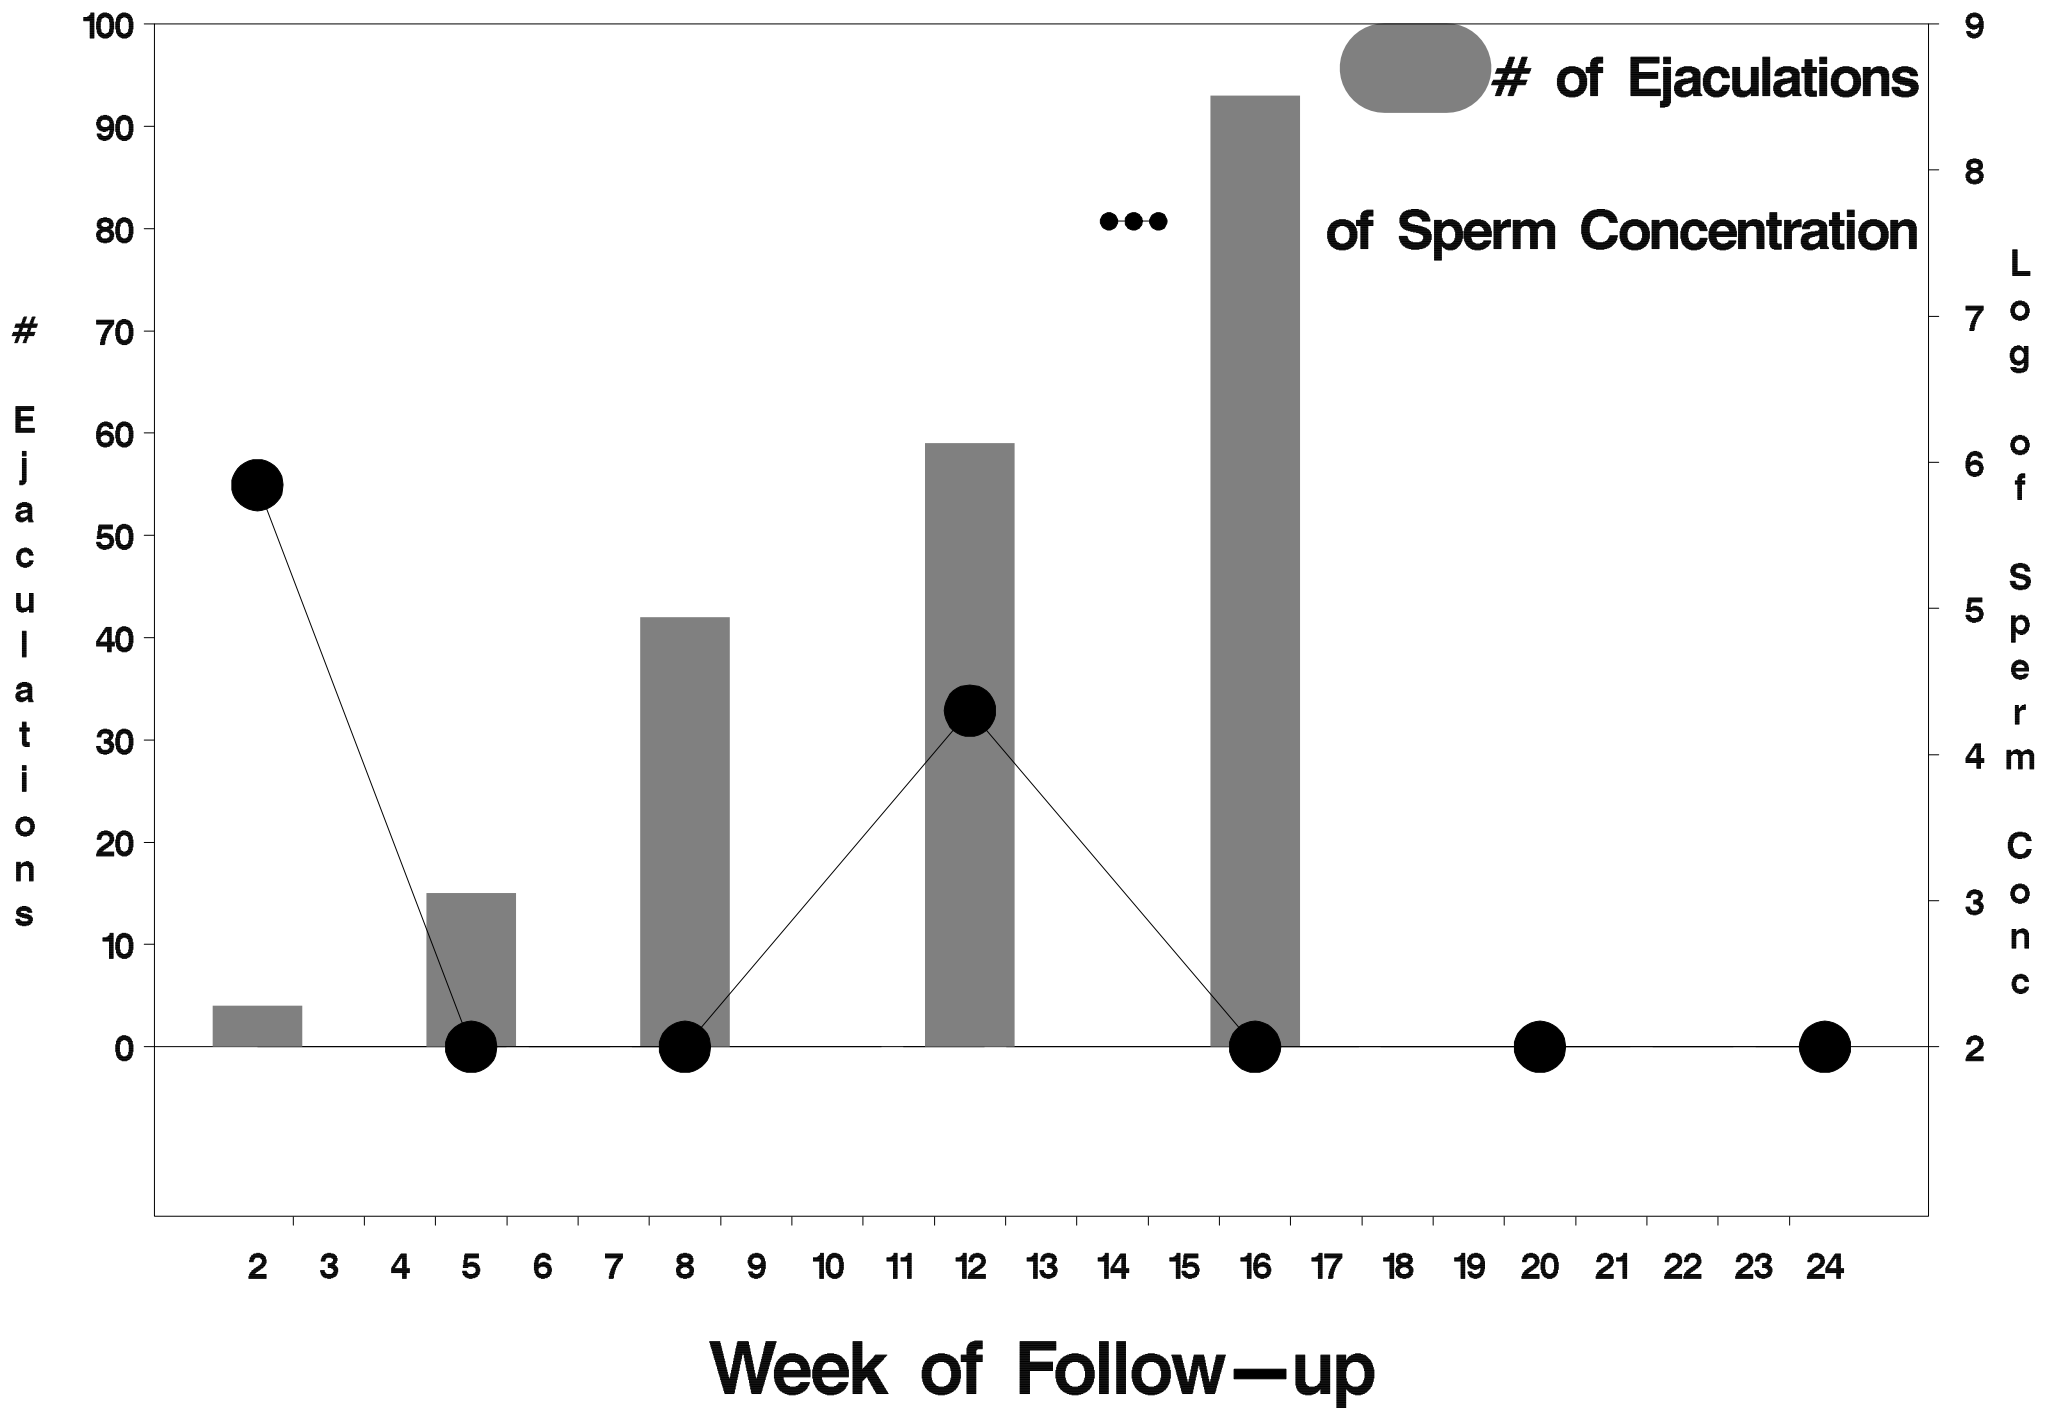

# Participant number= 103

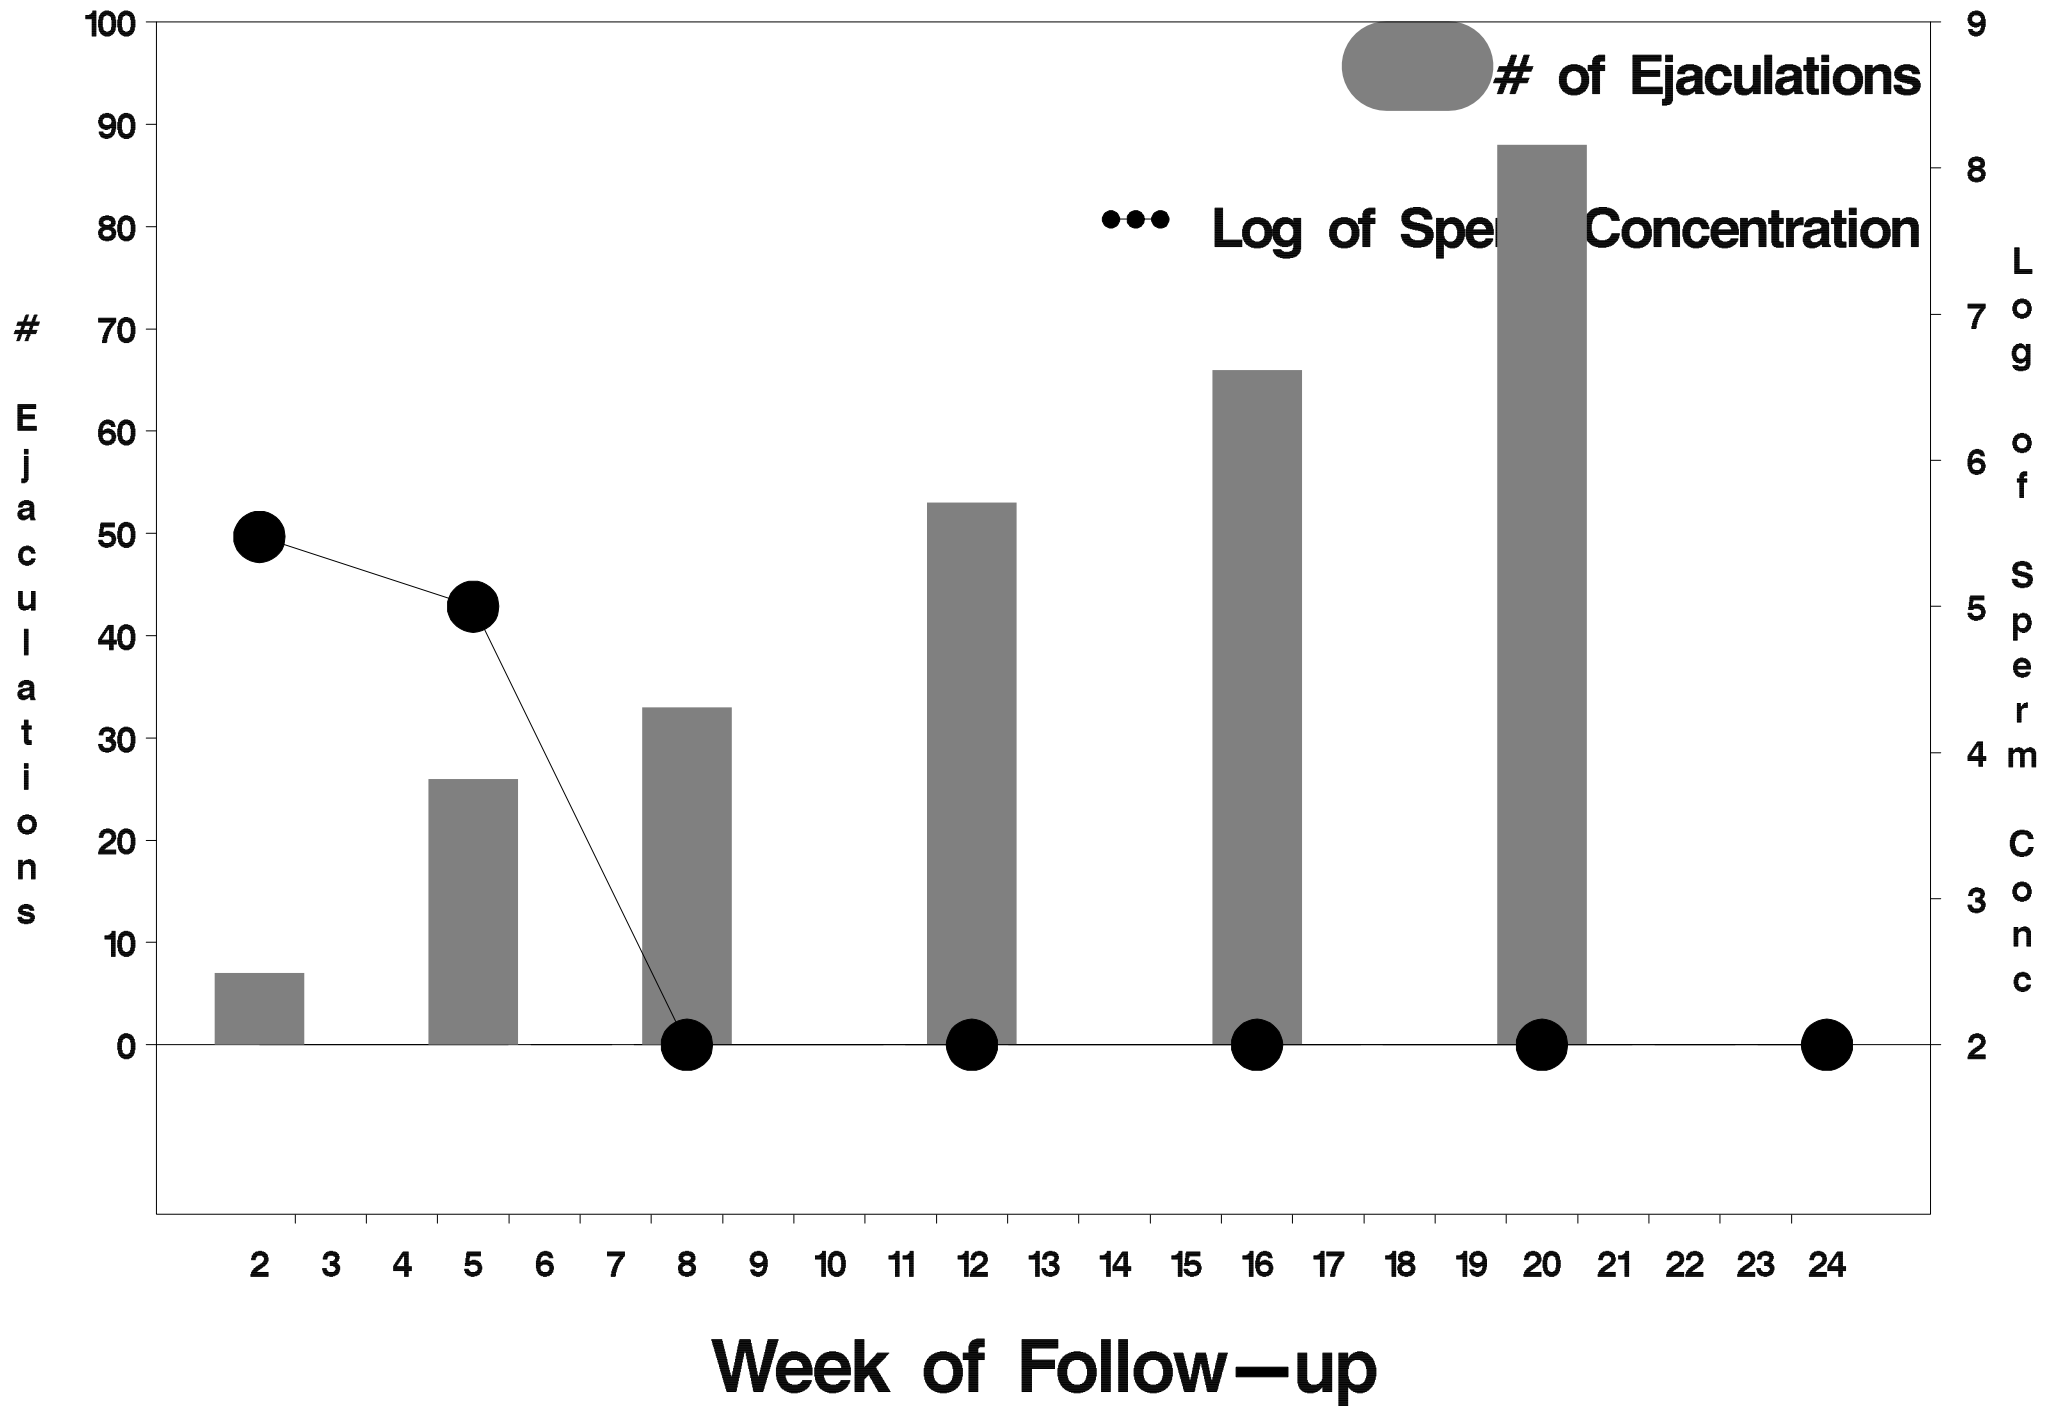

# Participant number= 104

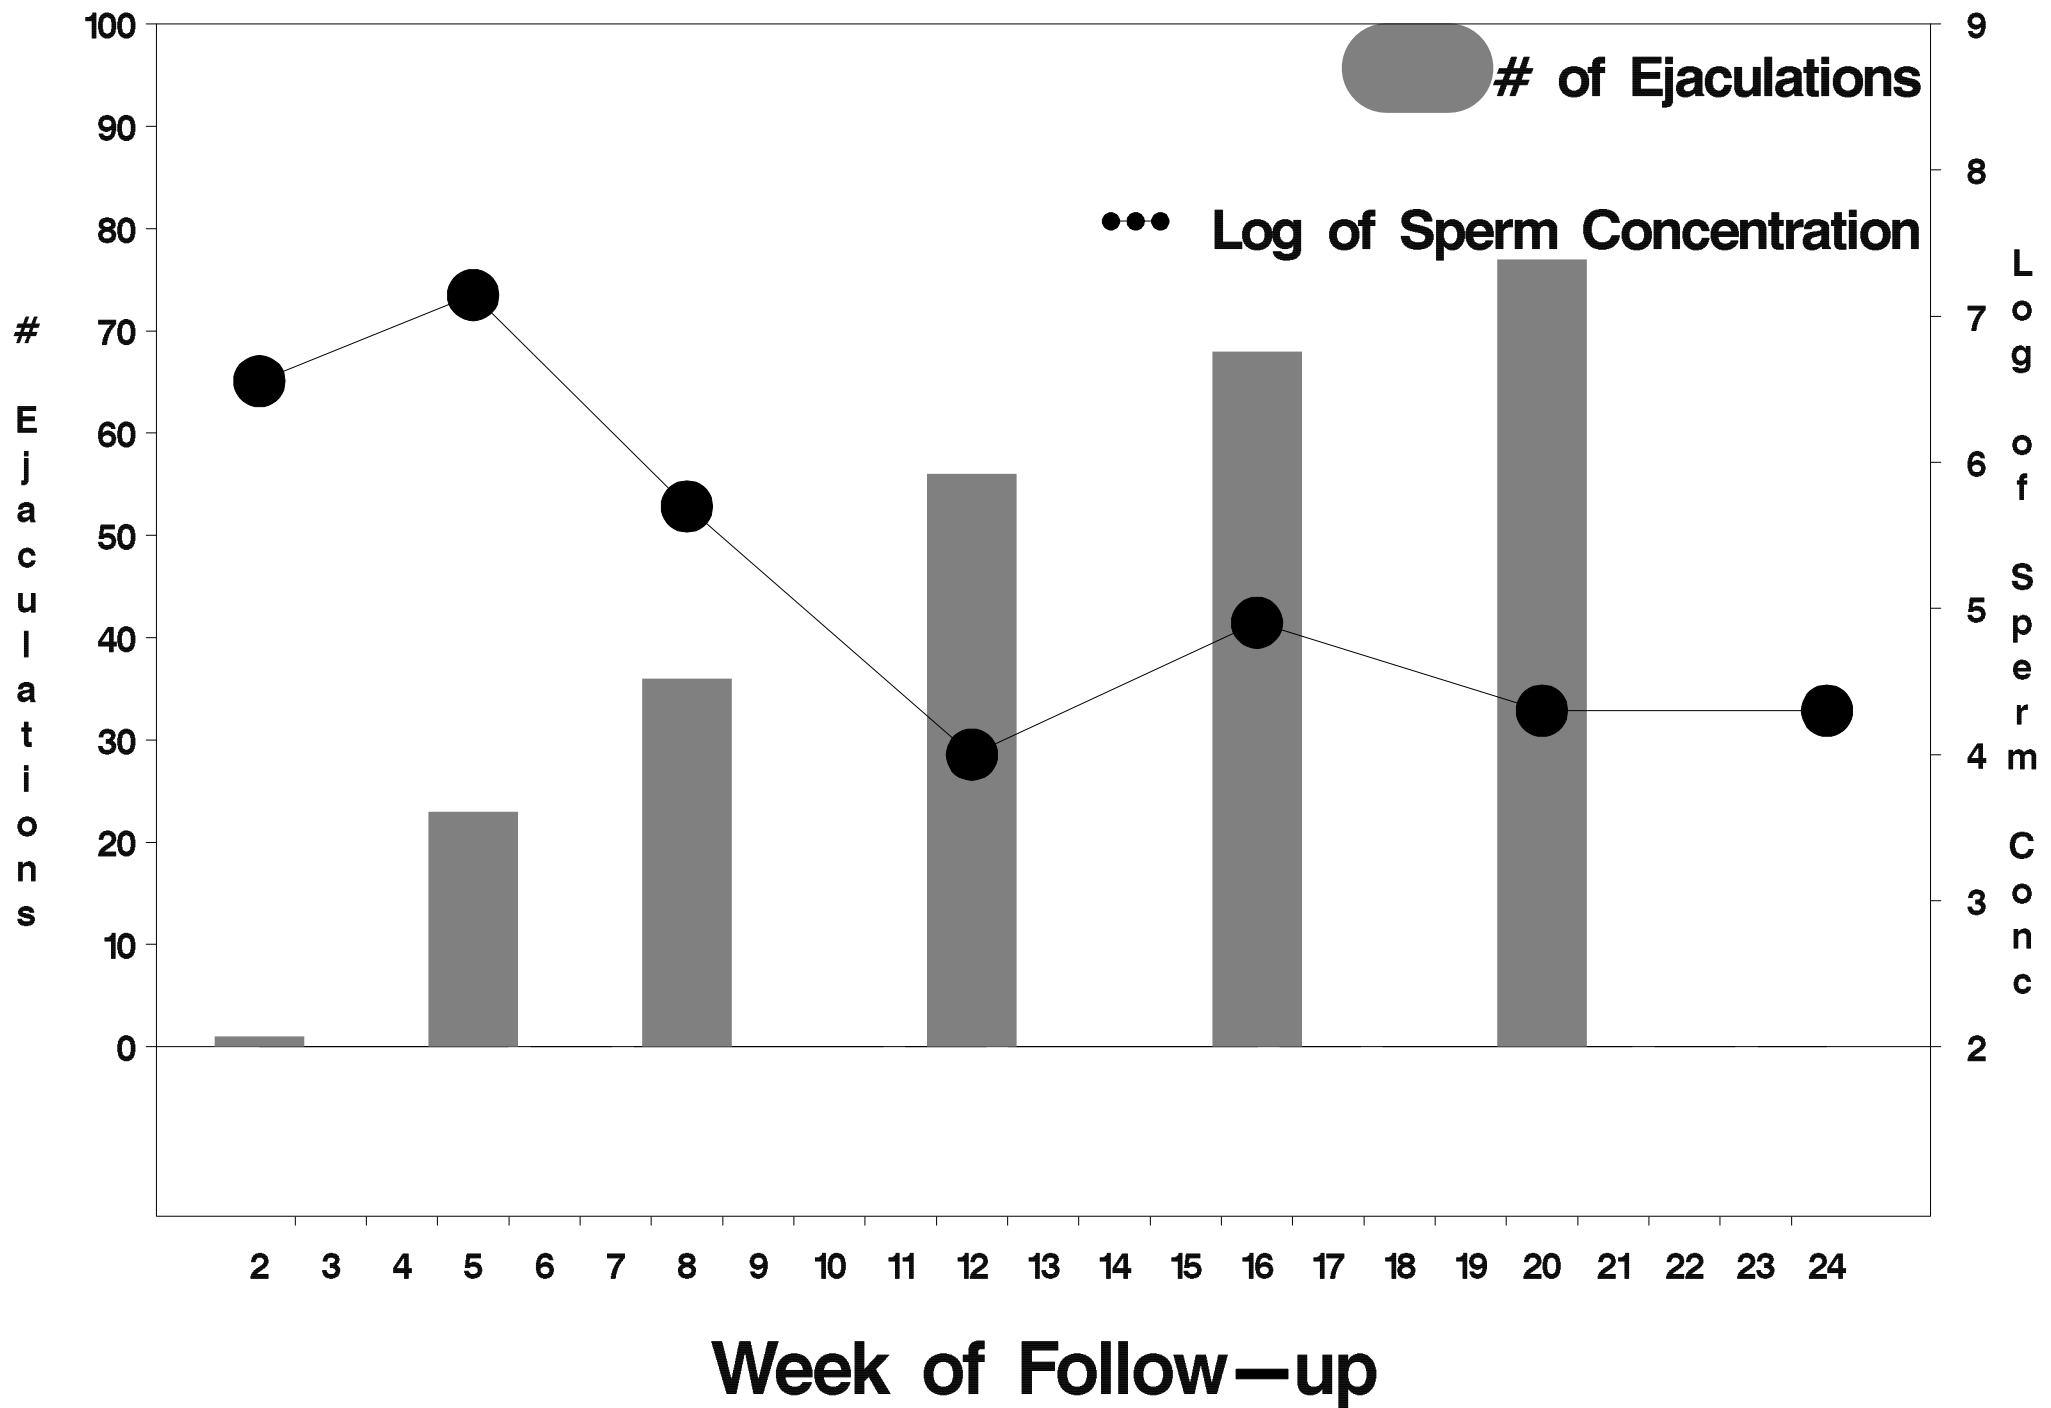

# Participant number= 105

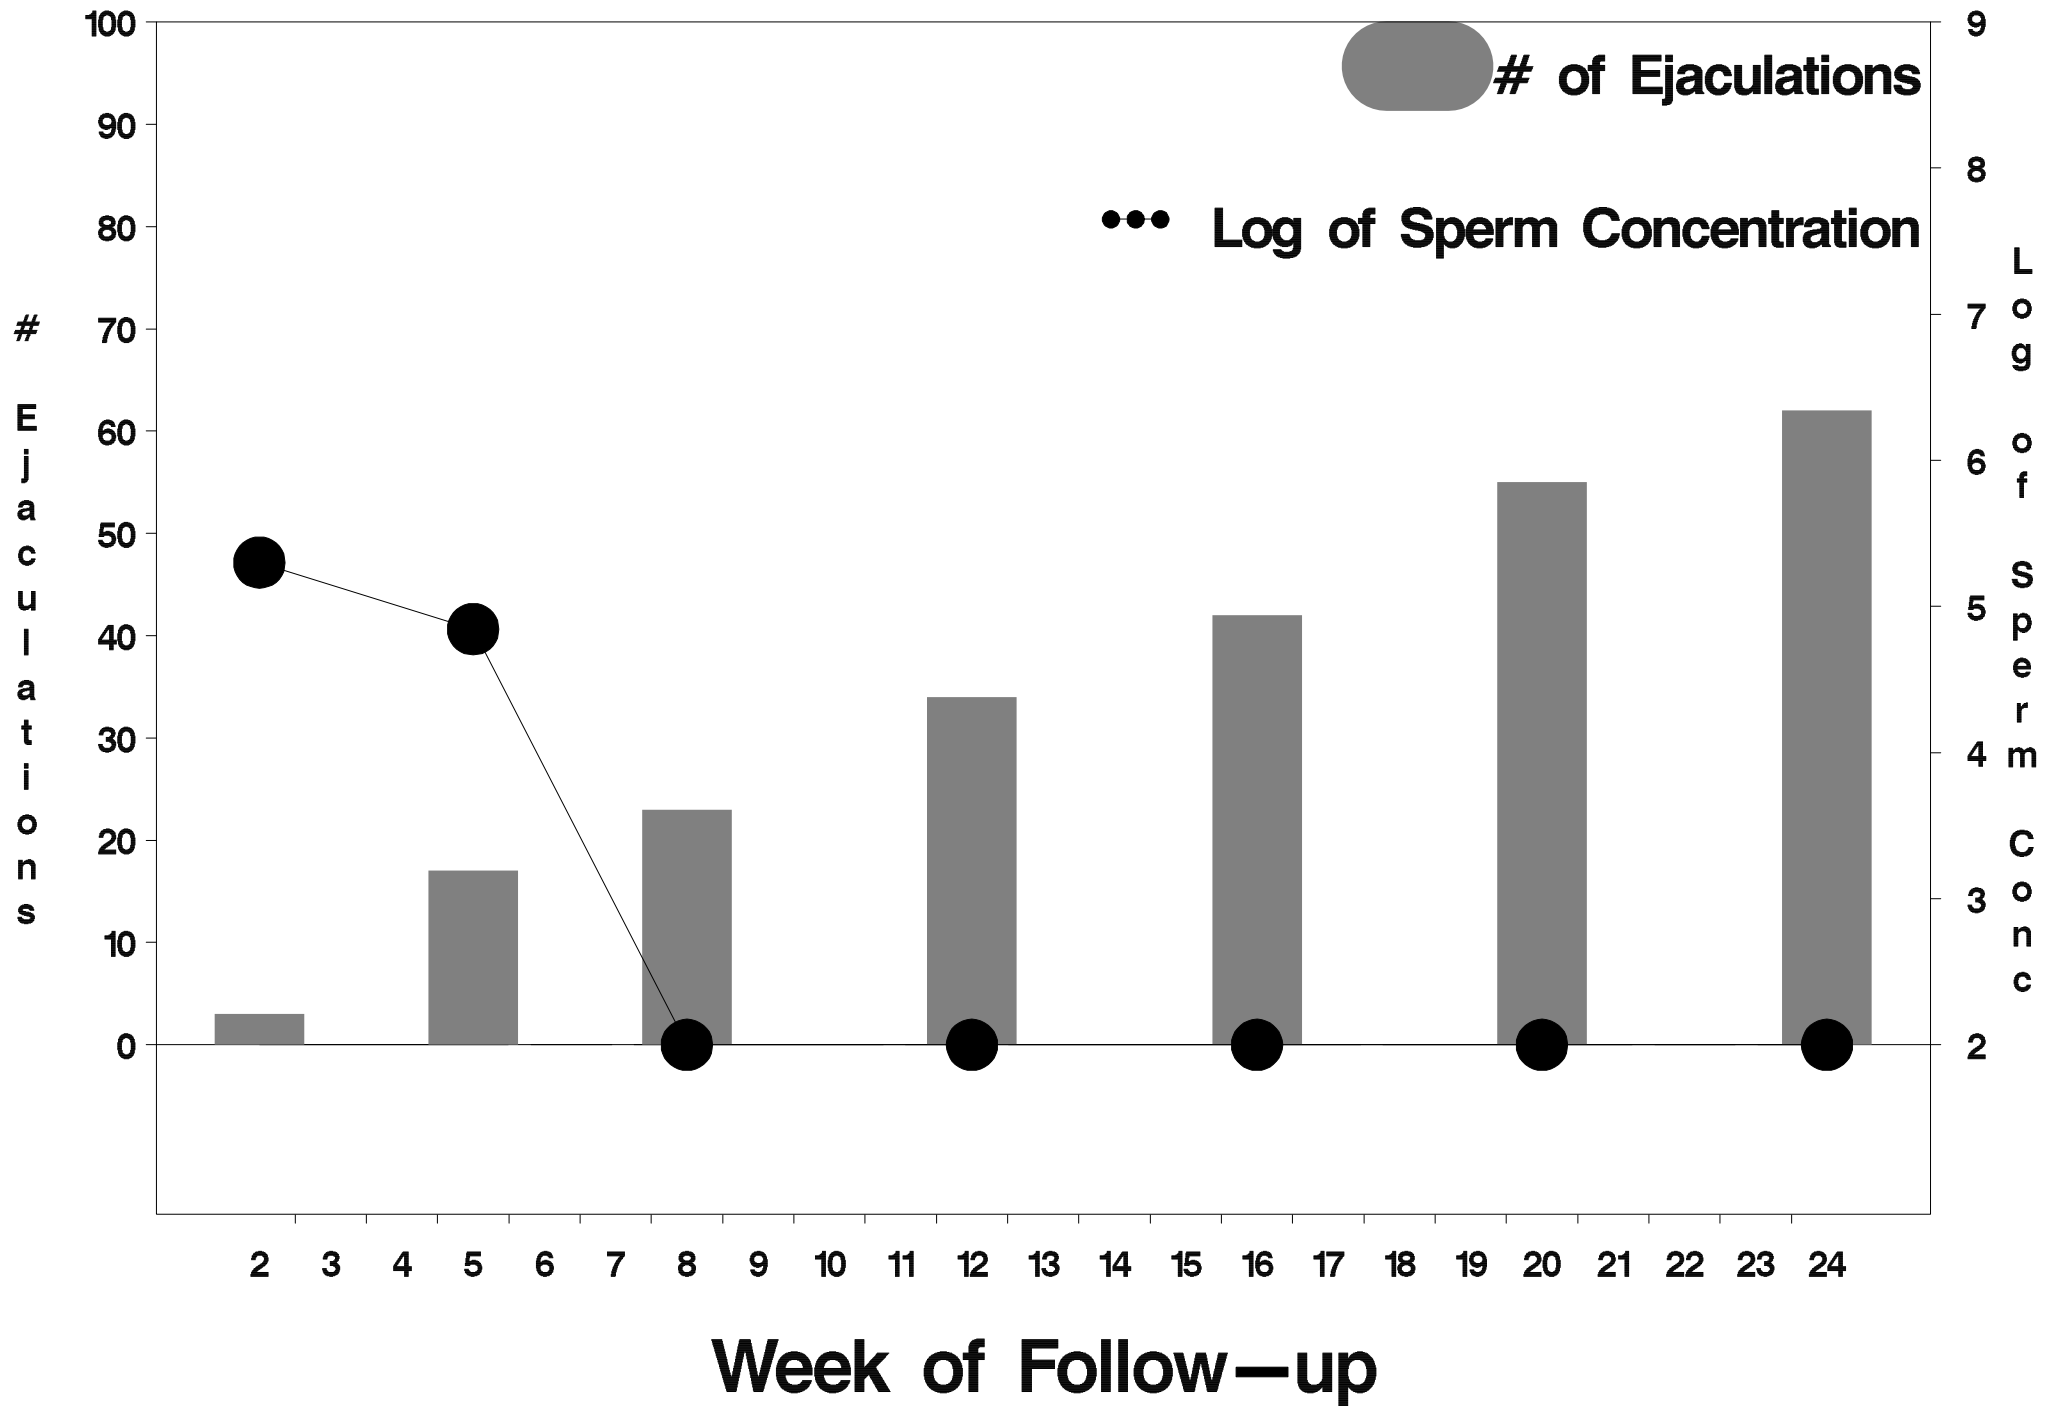

# Participant number= 106

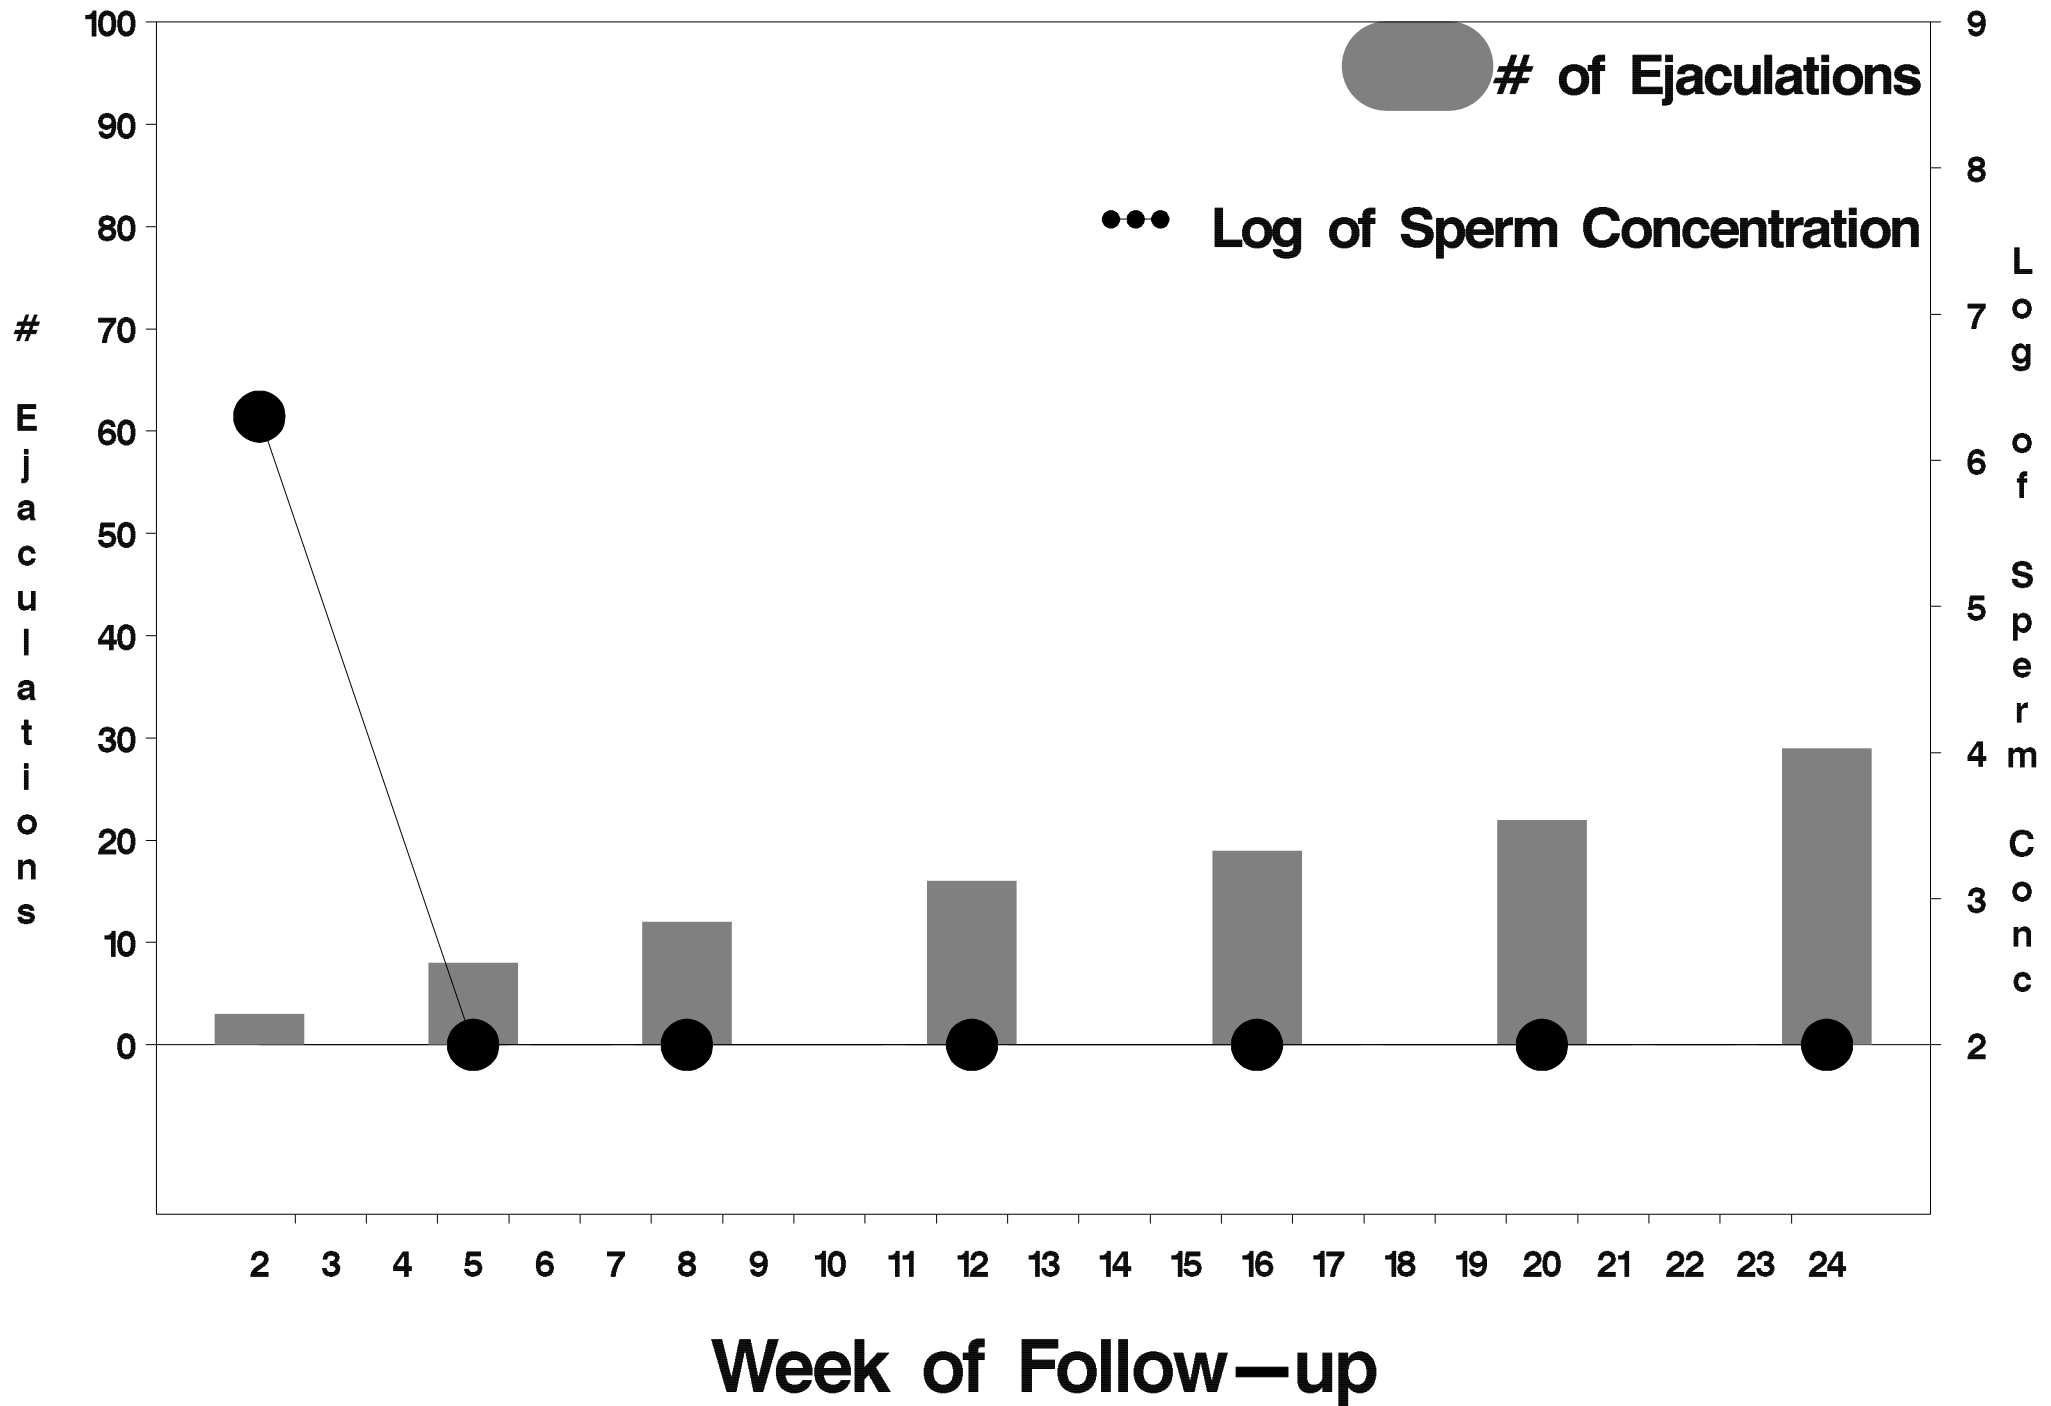

# Participant number= 107

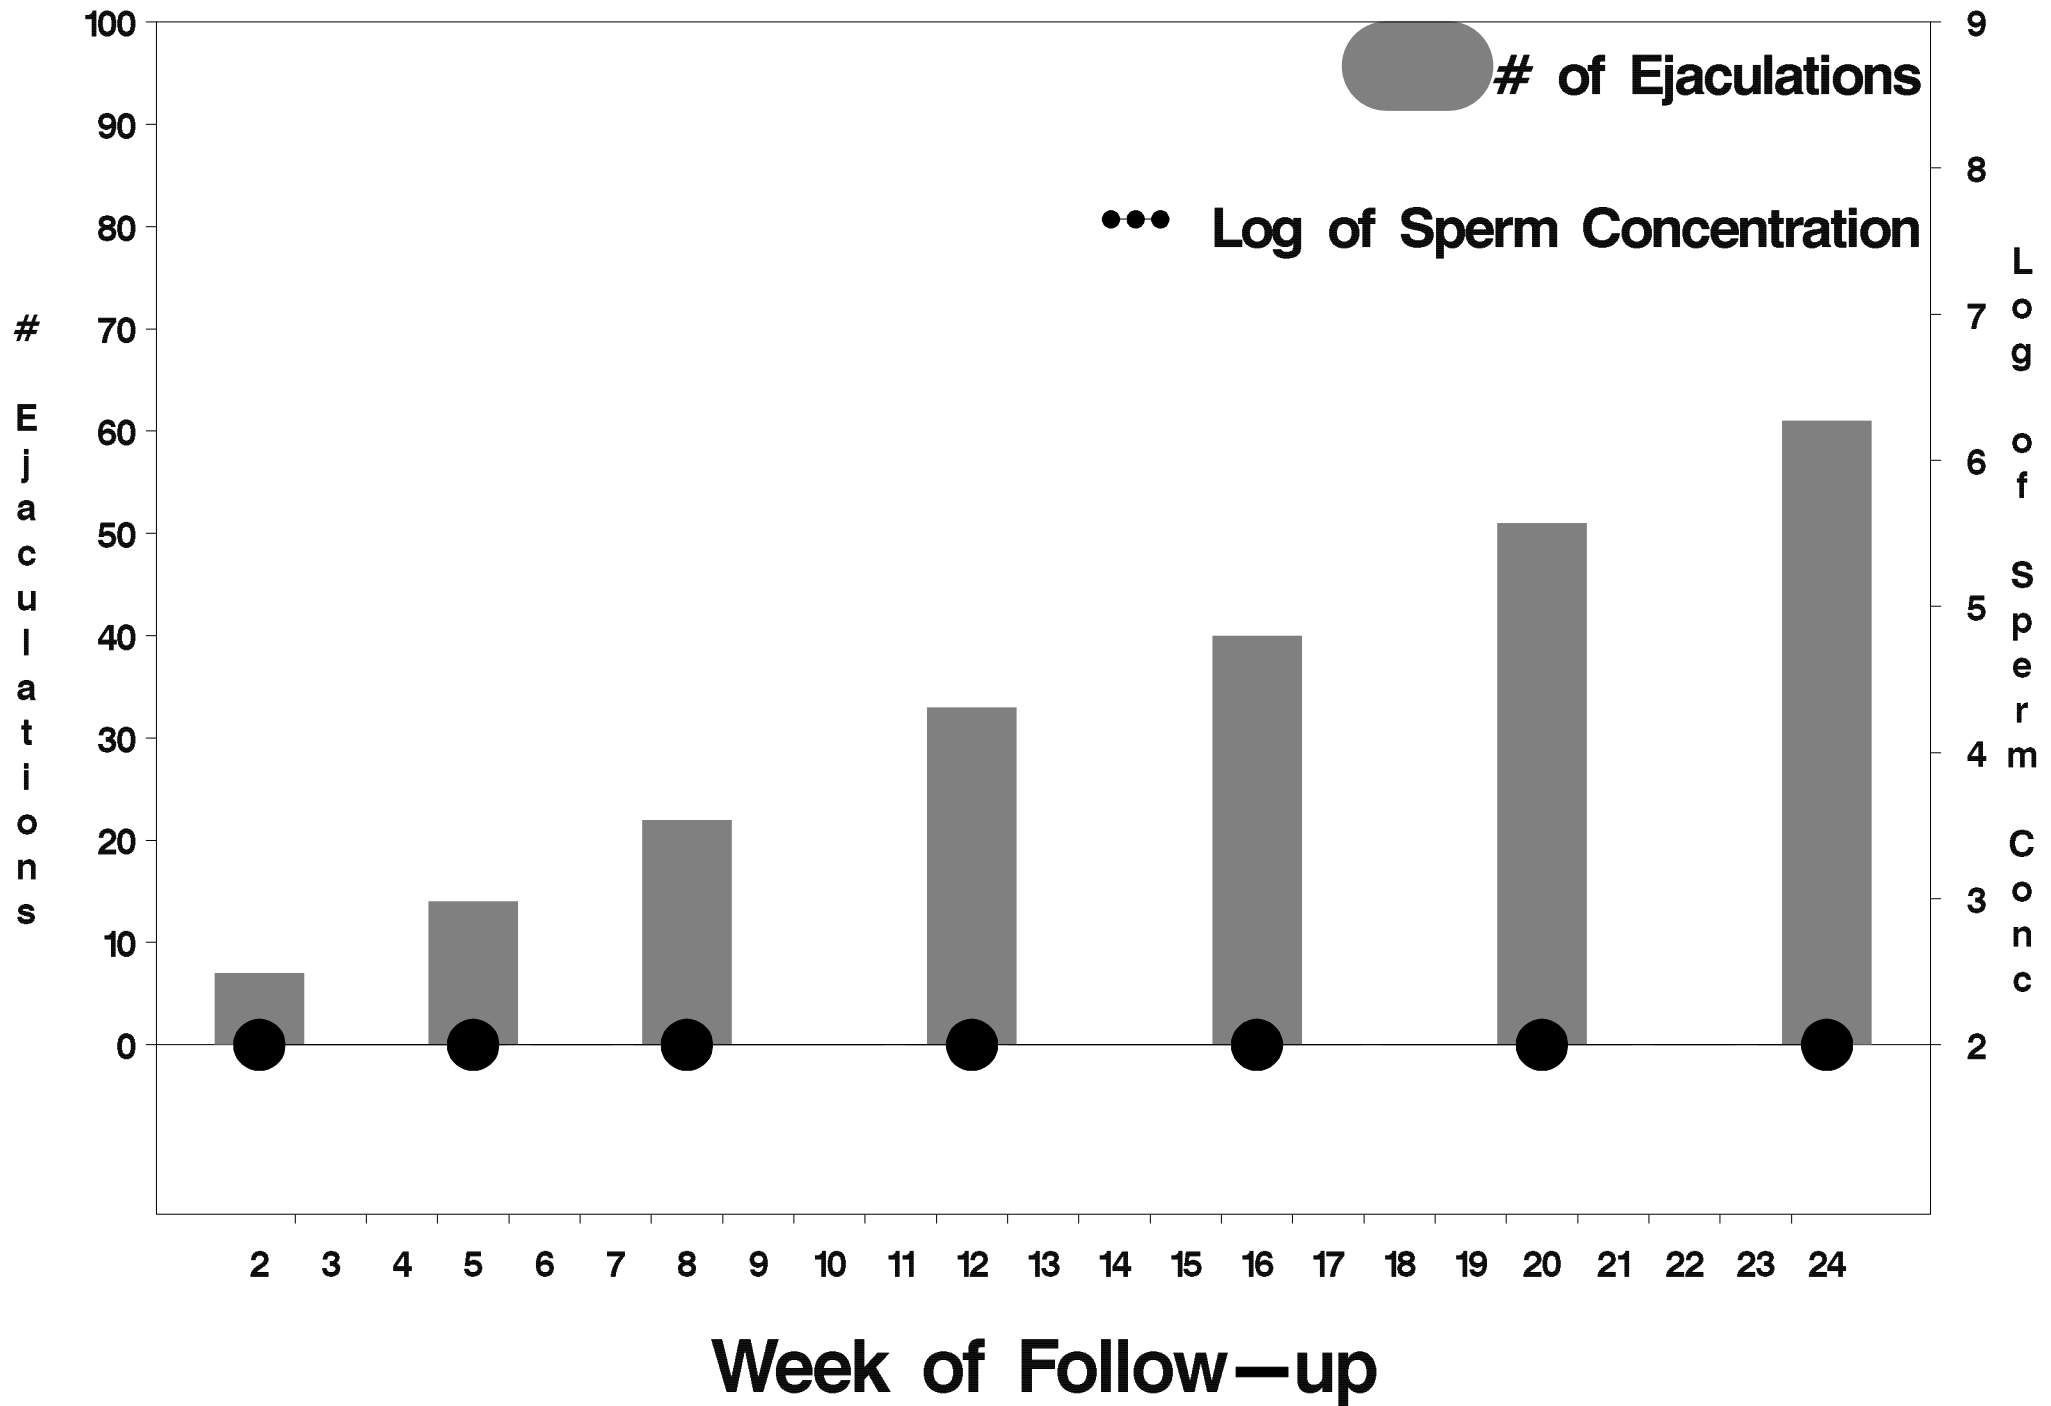

# Participant number= 108

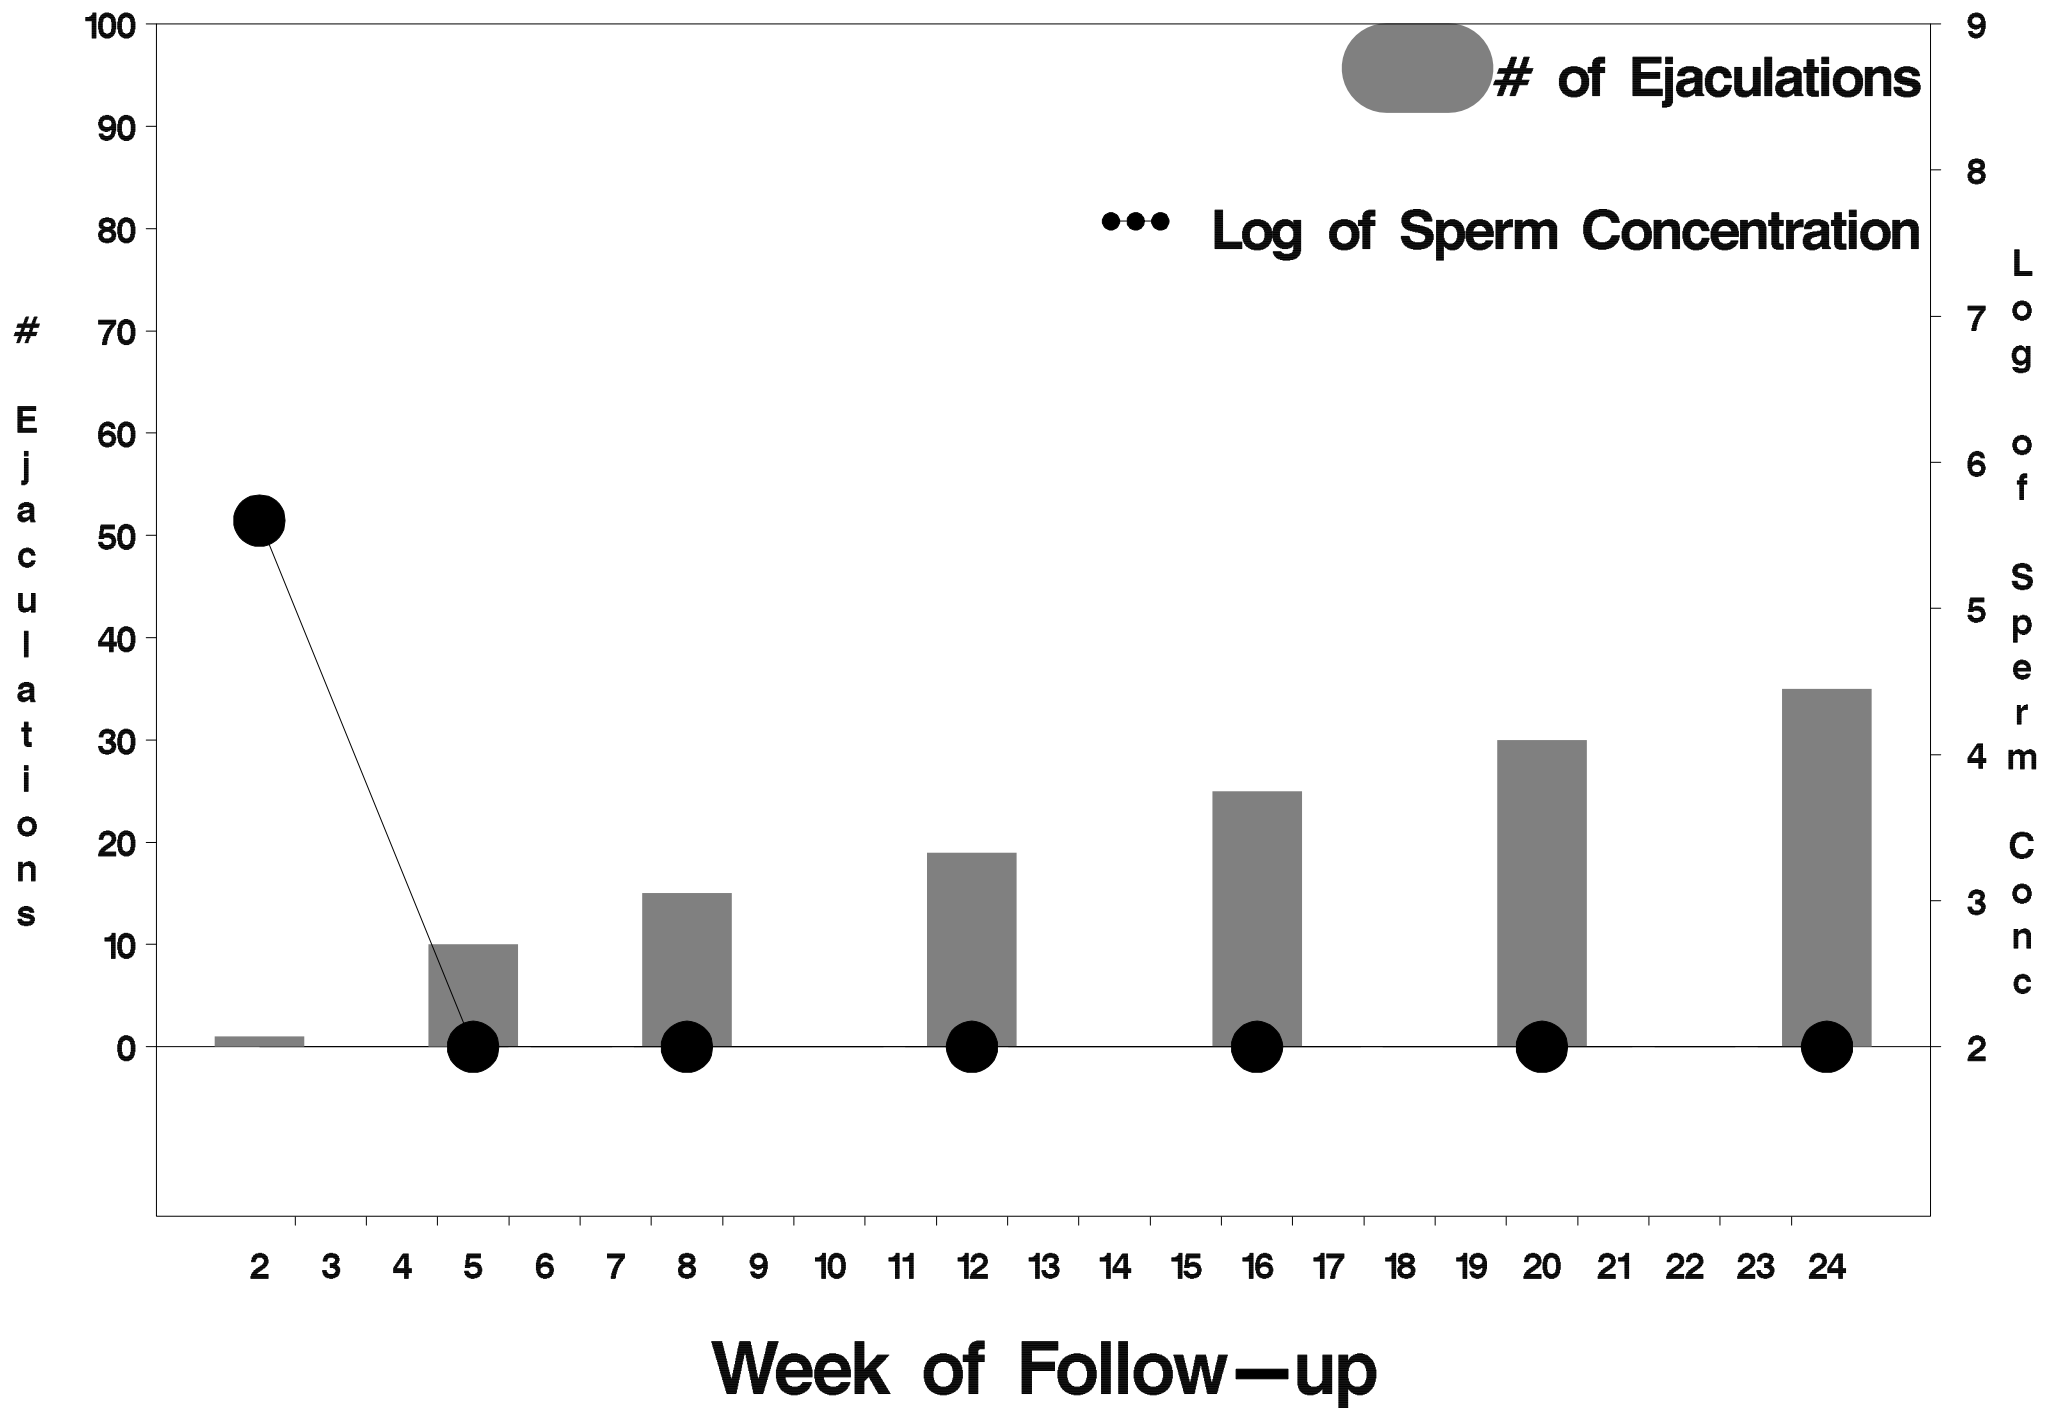



# Participant number= 109

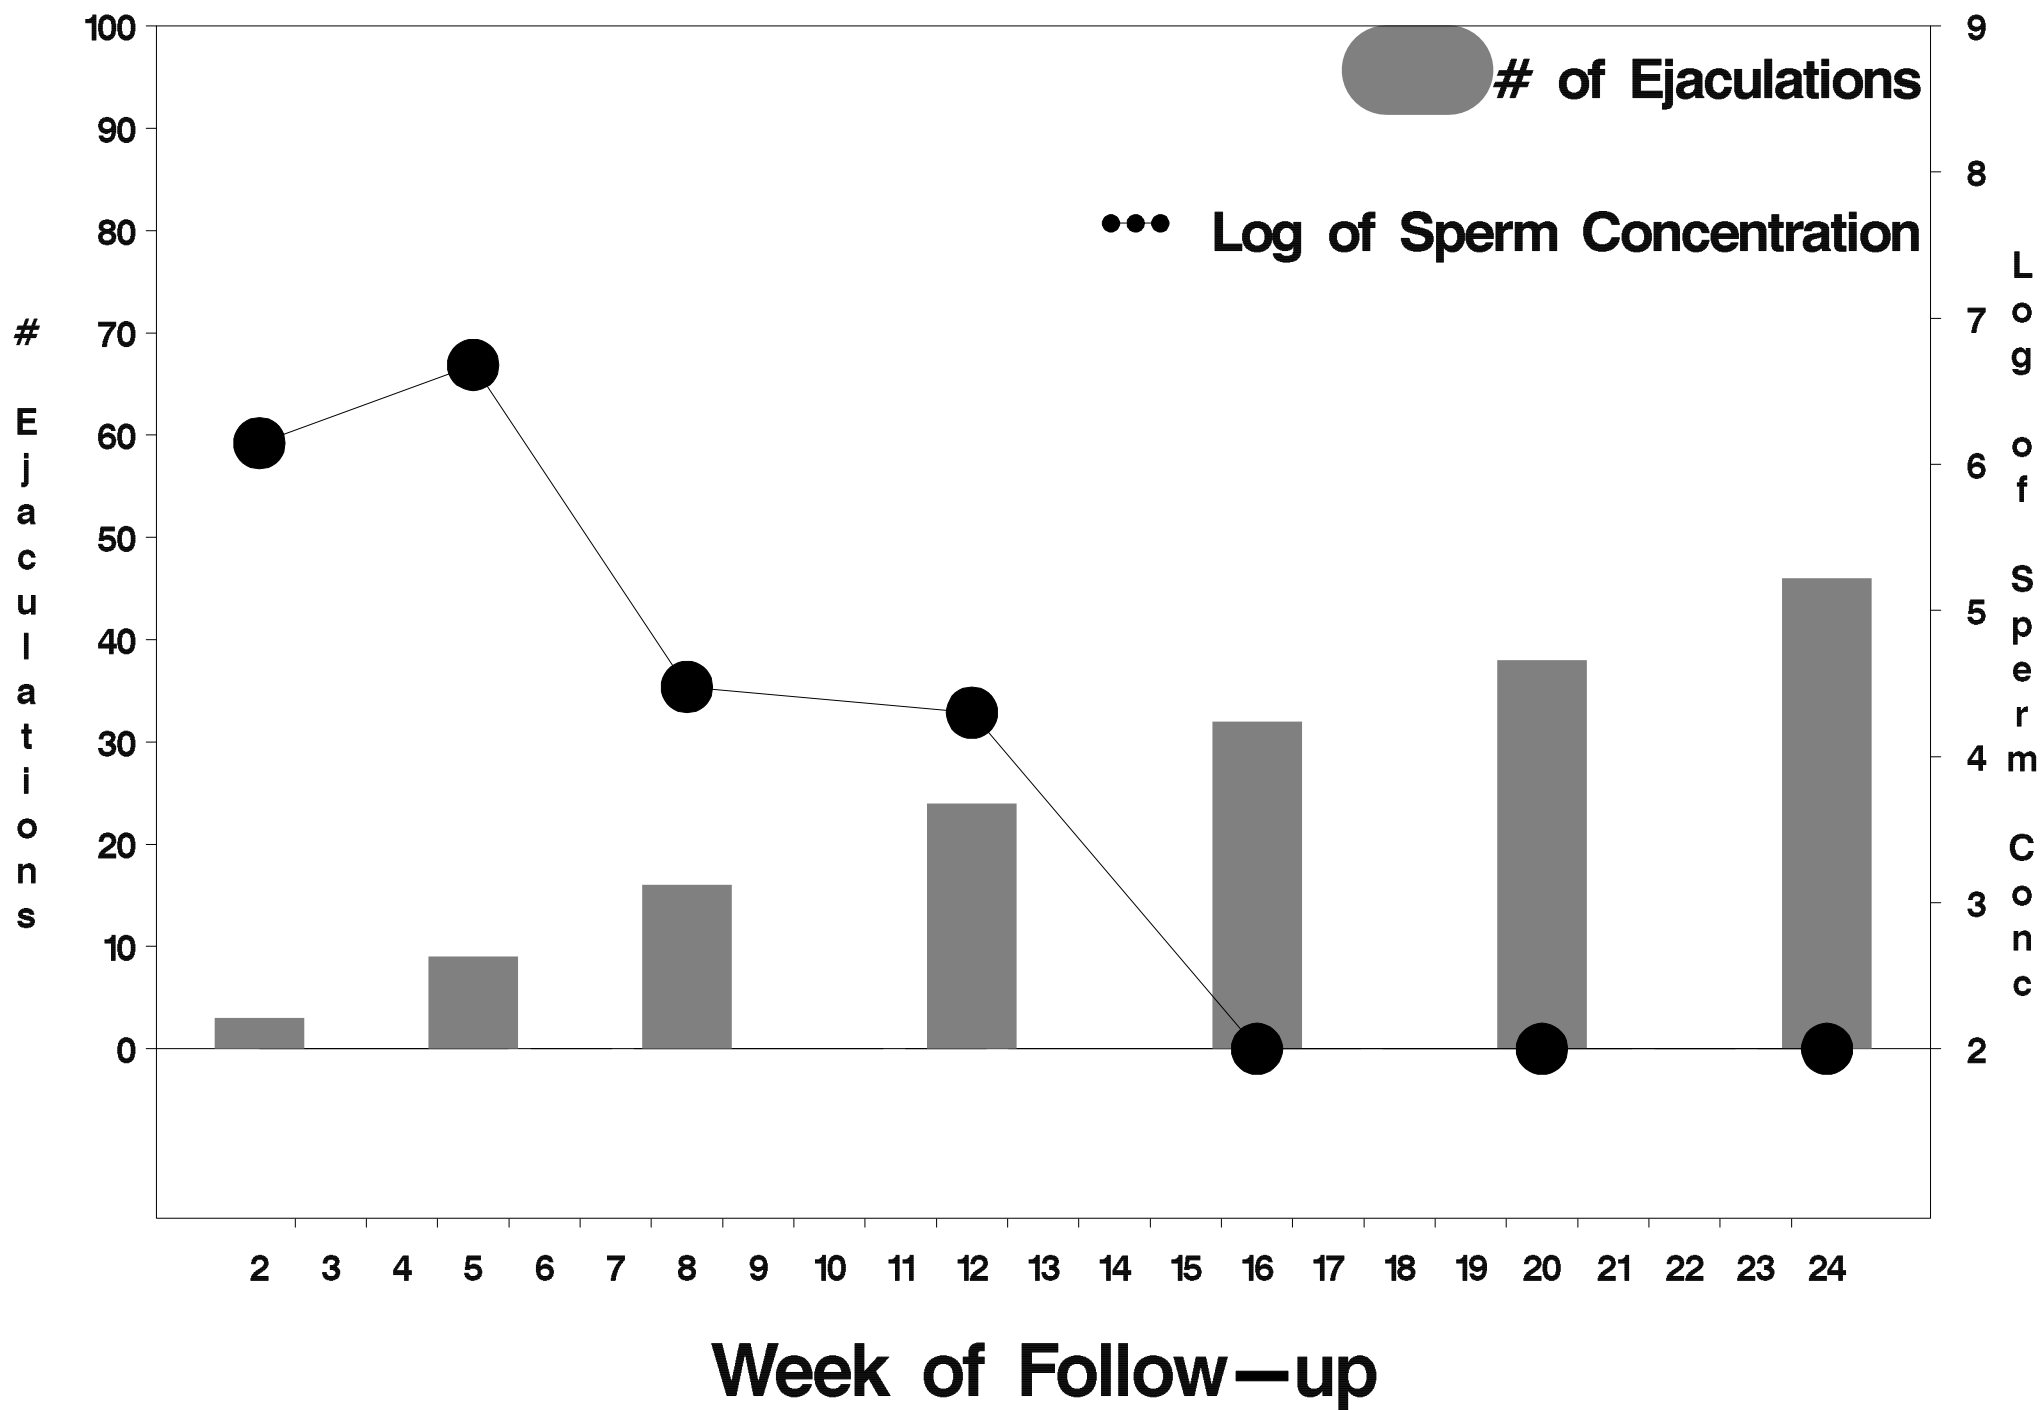

# Participant number= 110

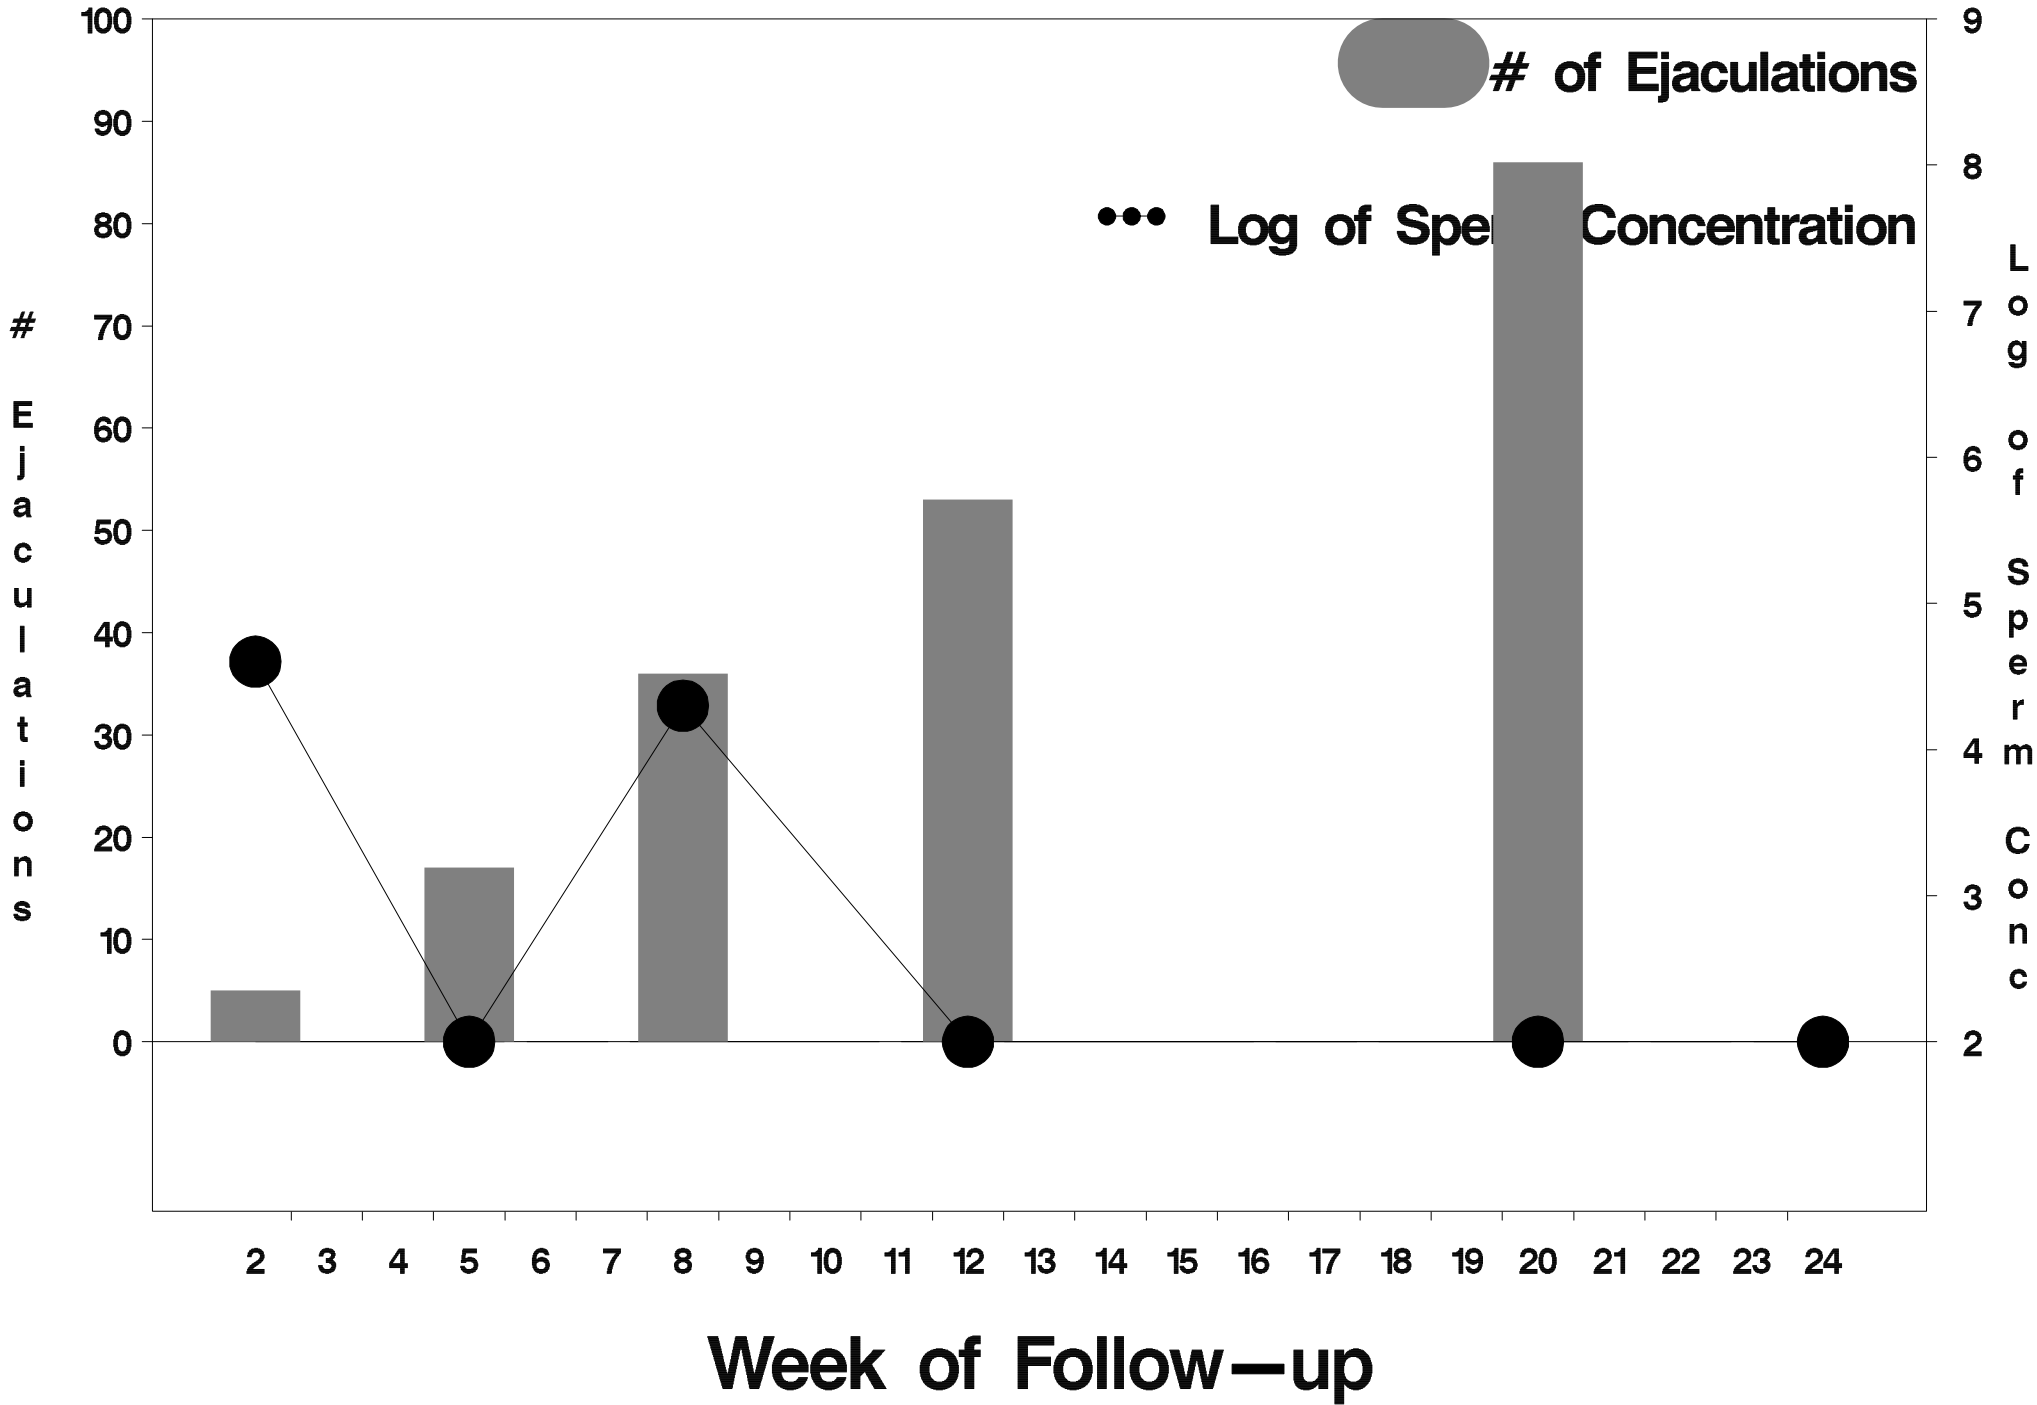

# Participant number= 111

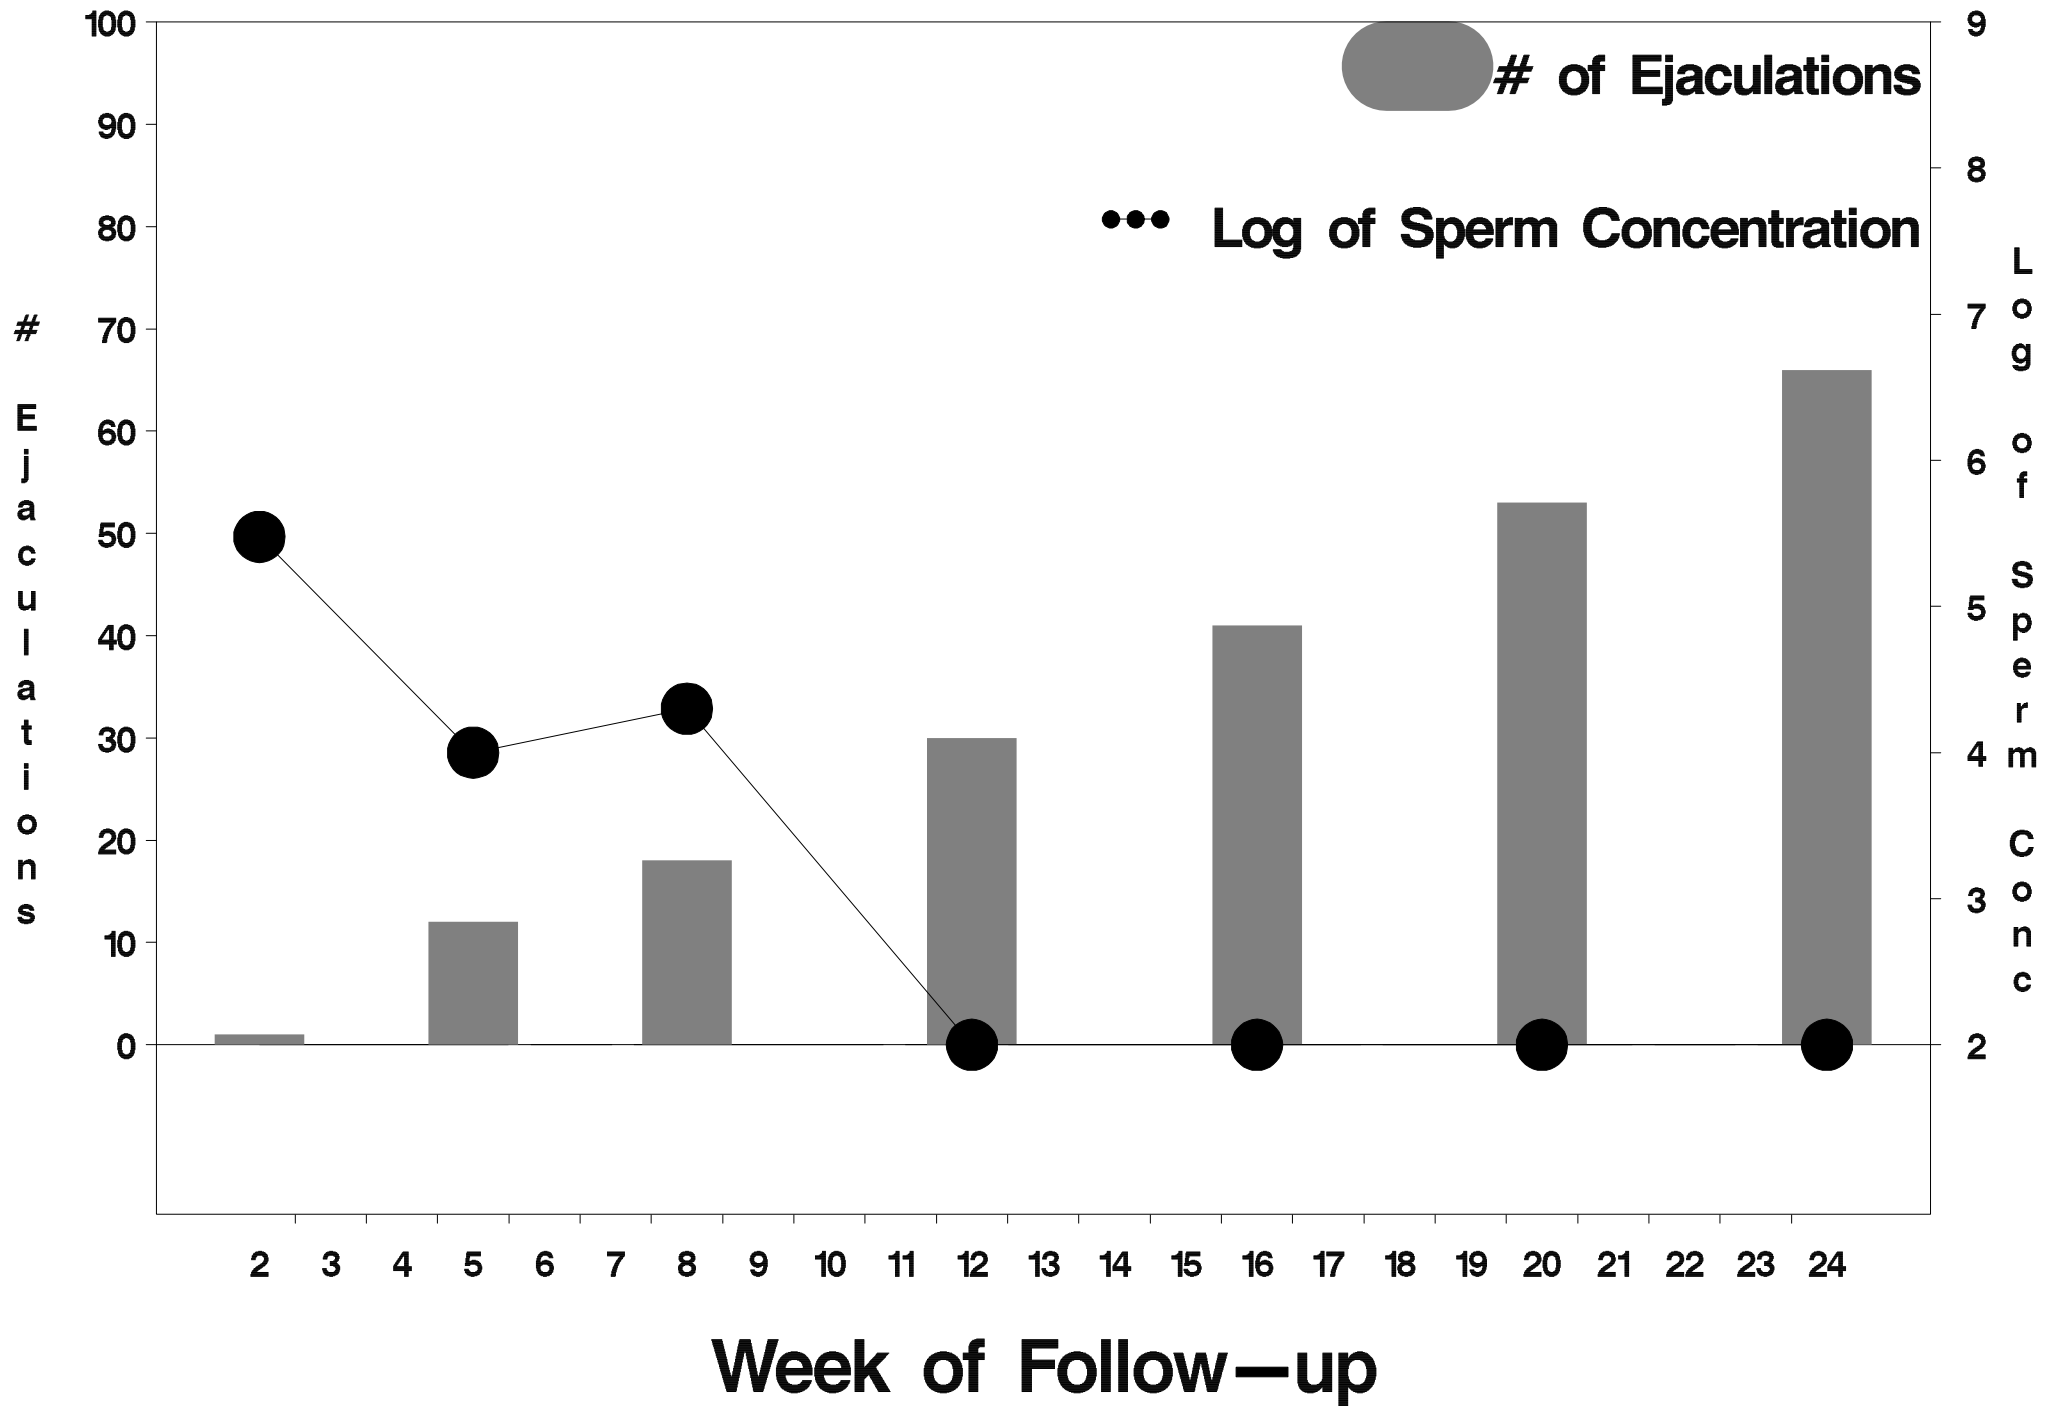

# Participant number= 112

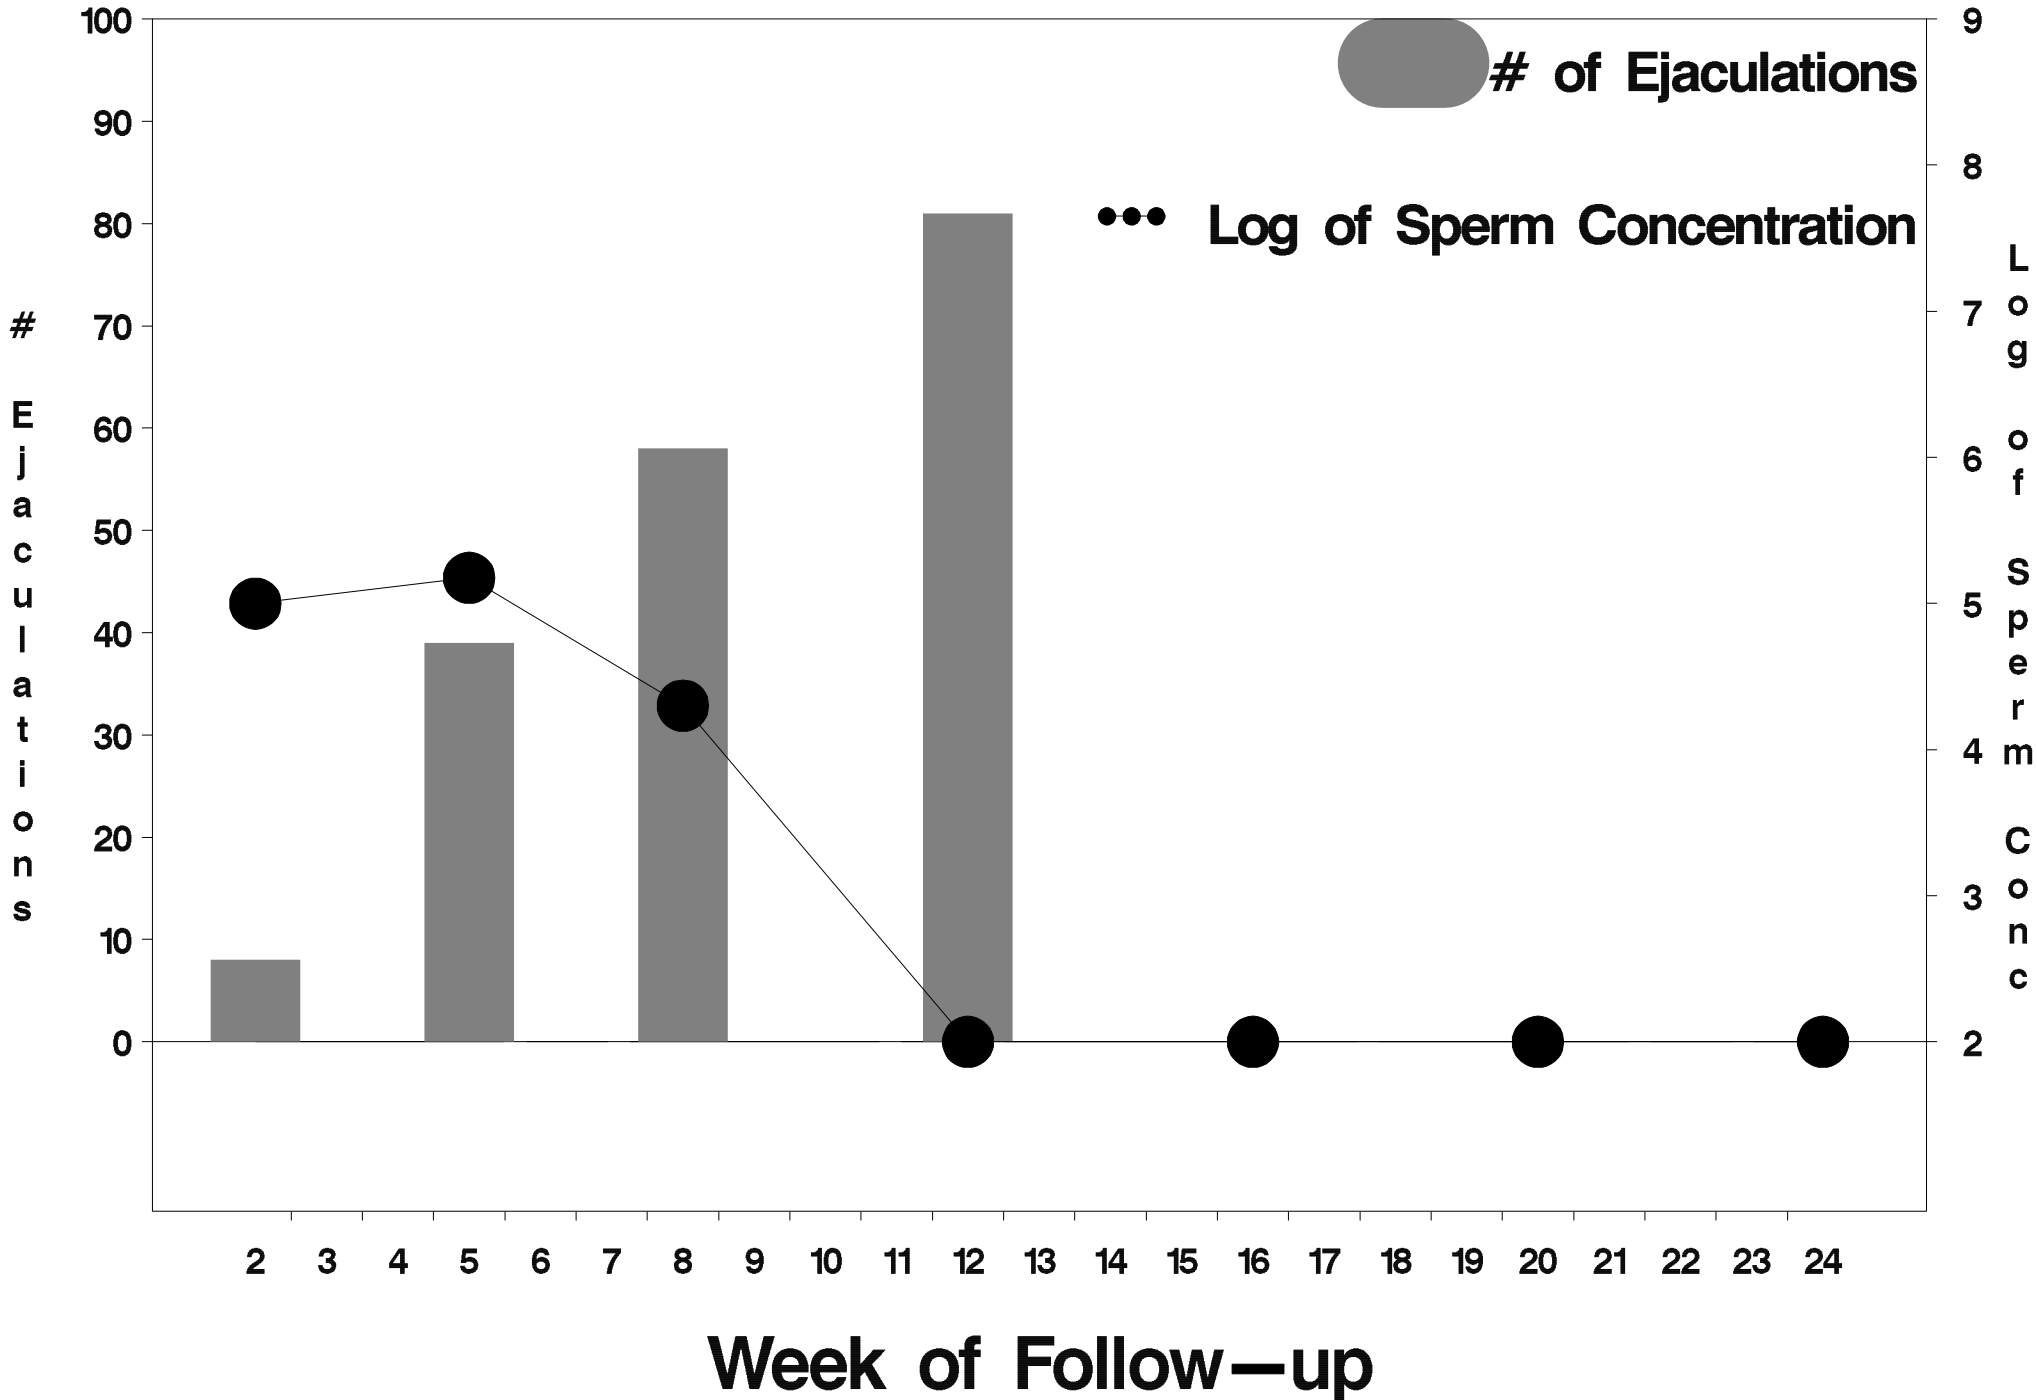

# Participant number= 113

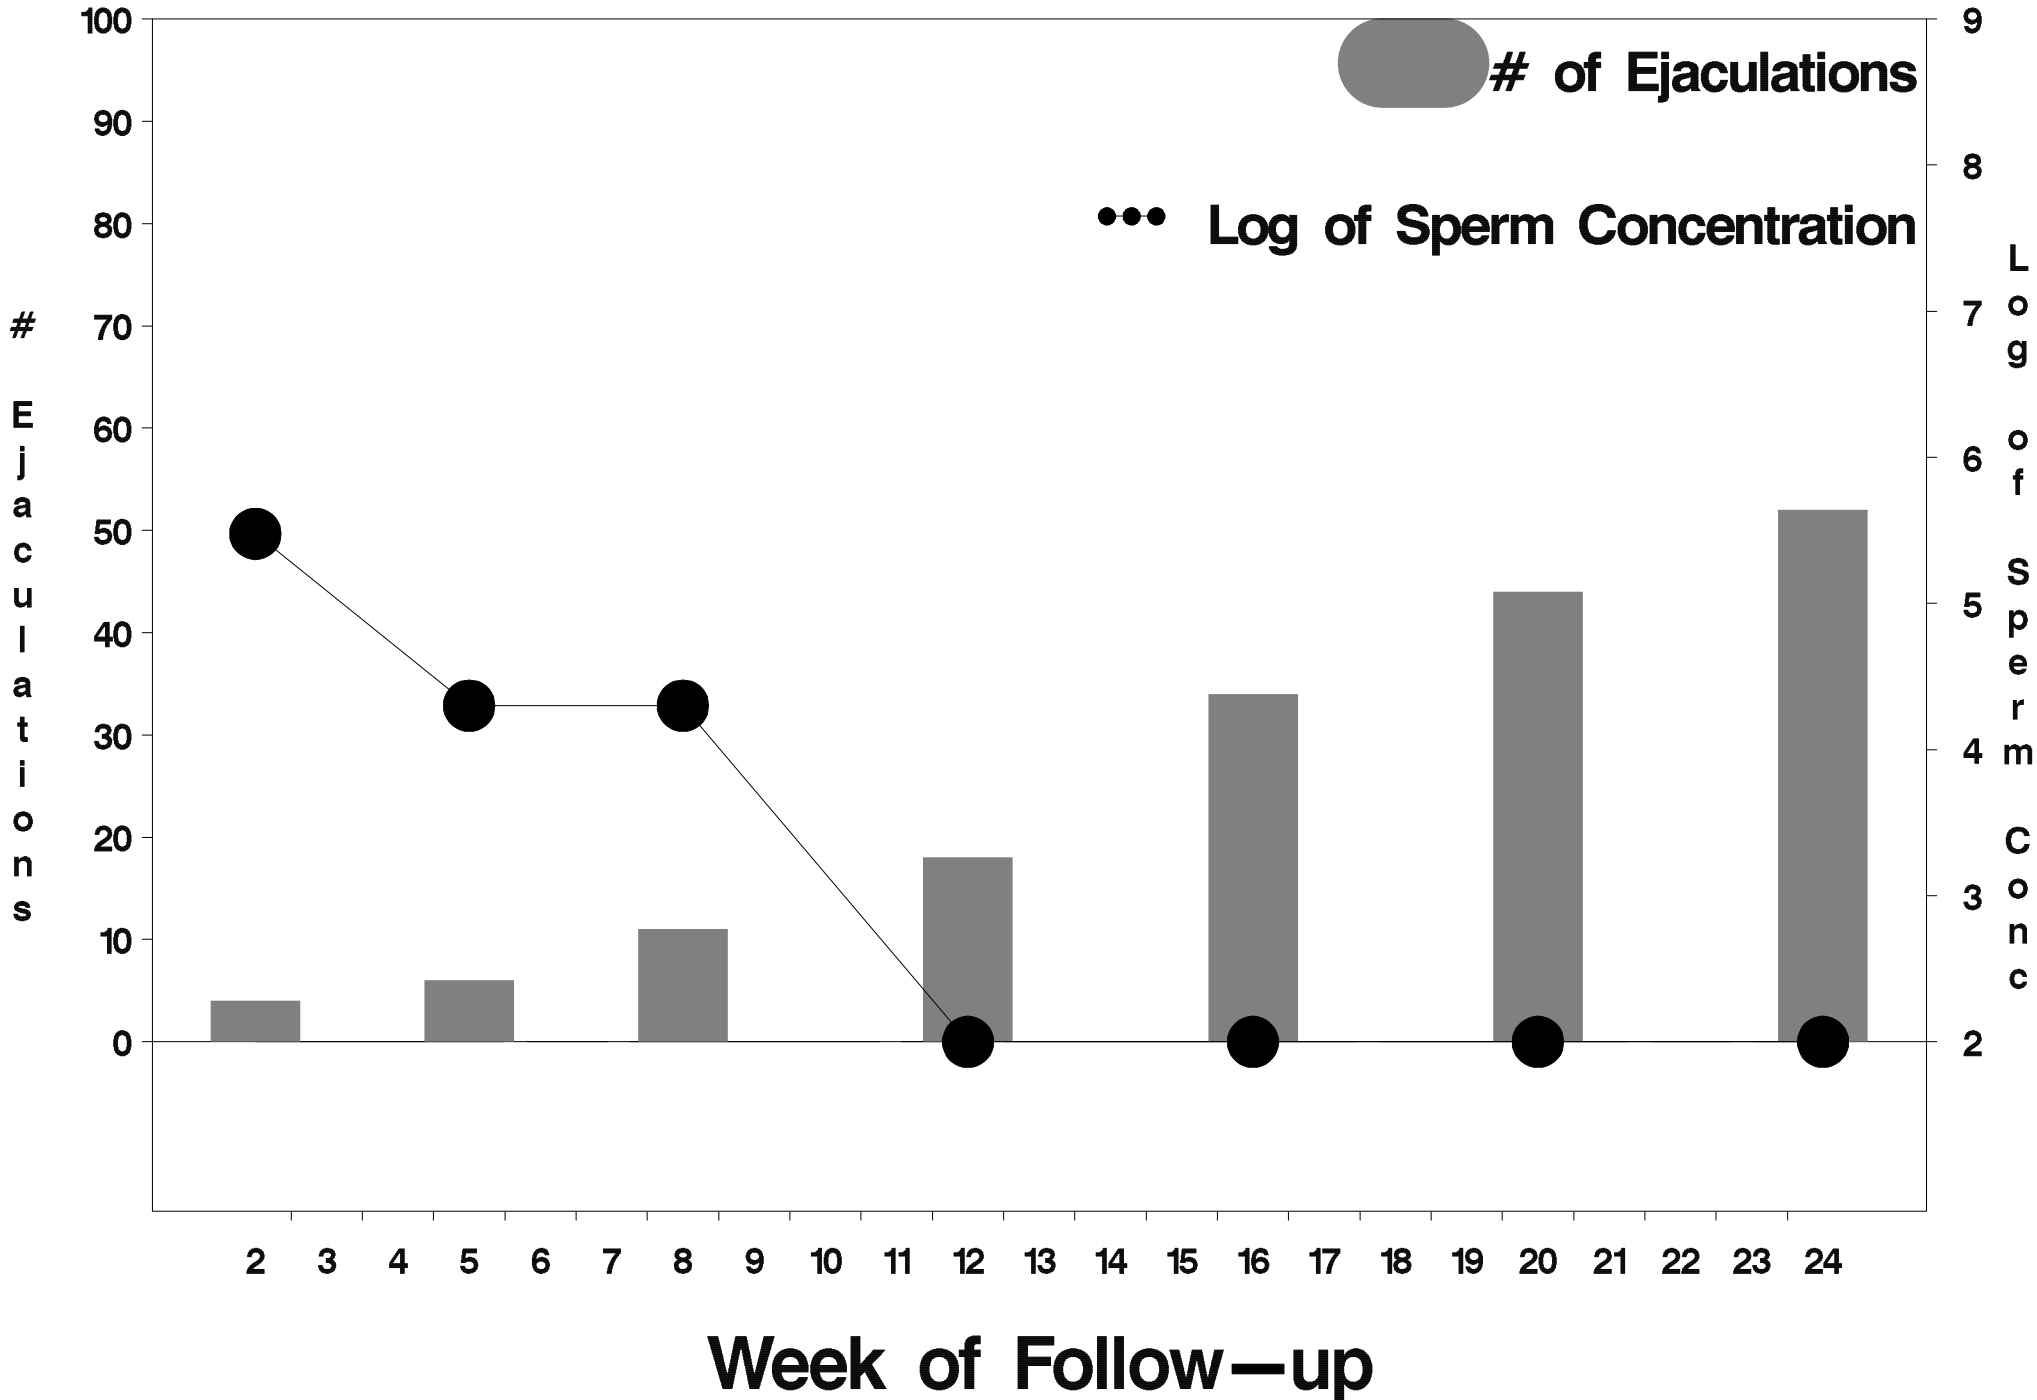

# Participant number= 114

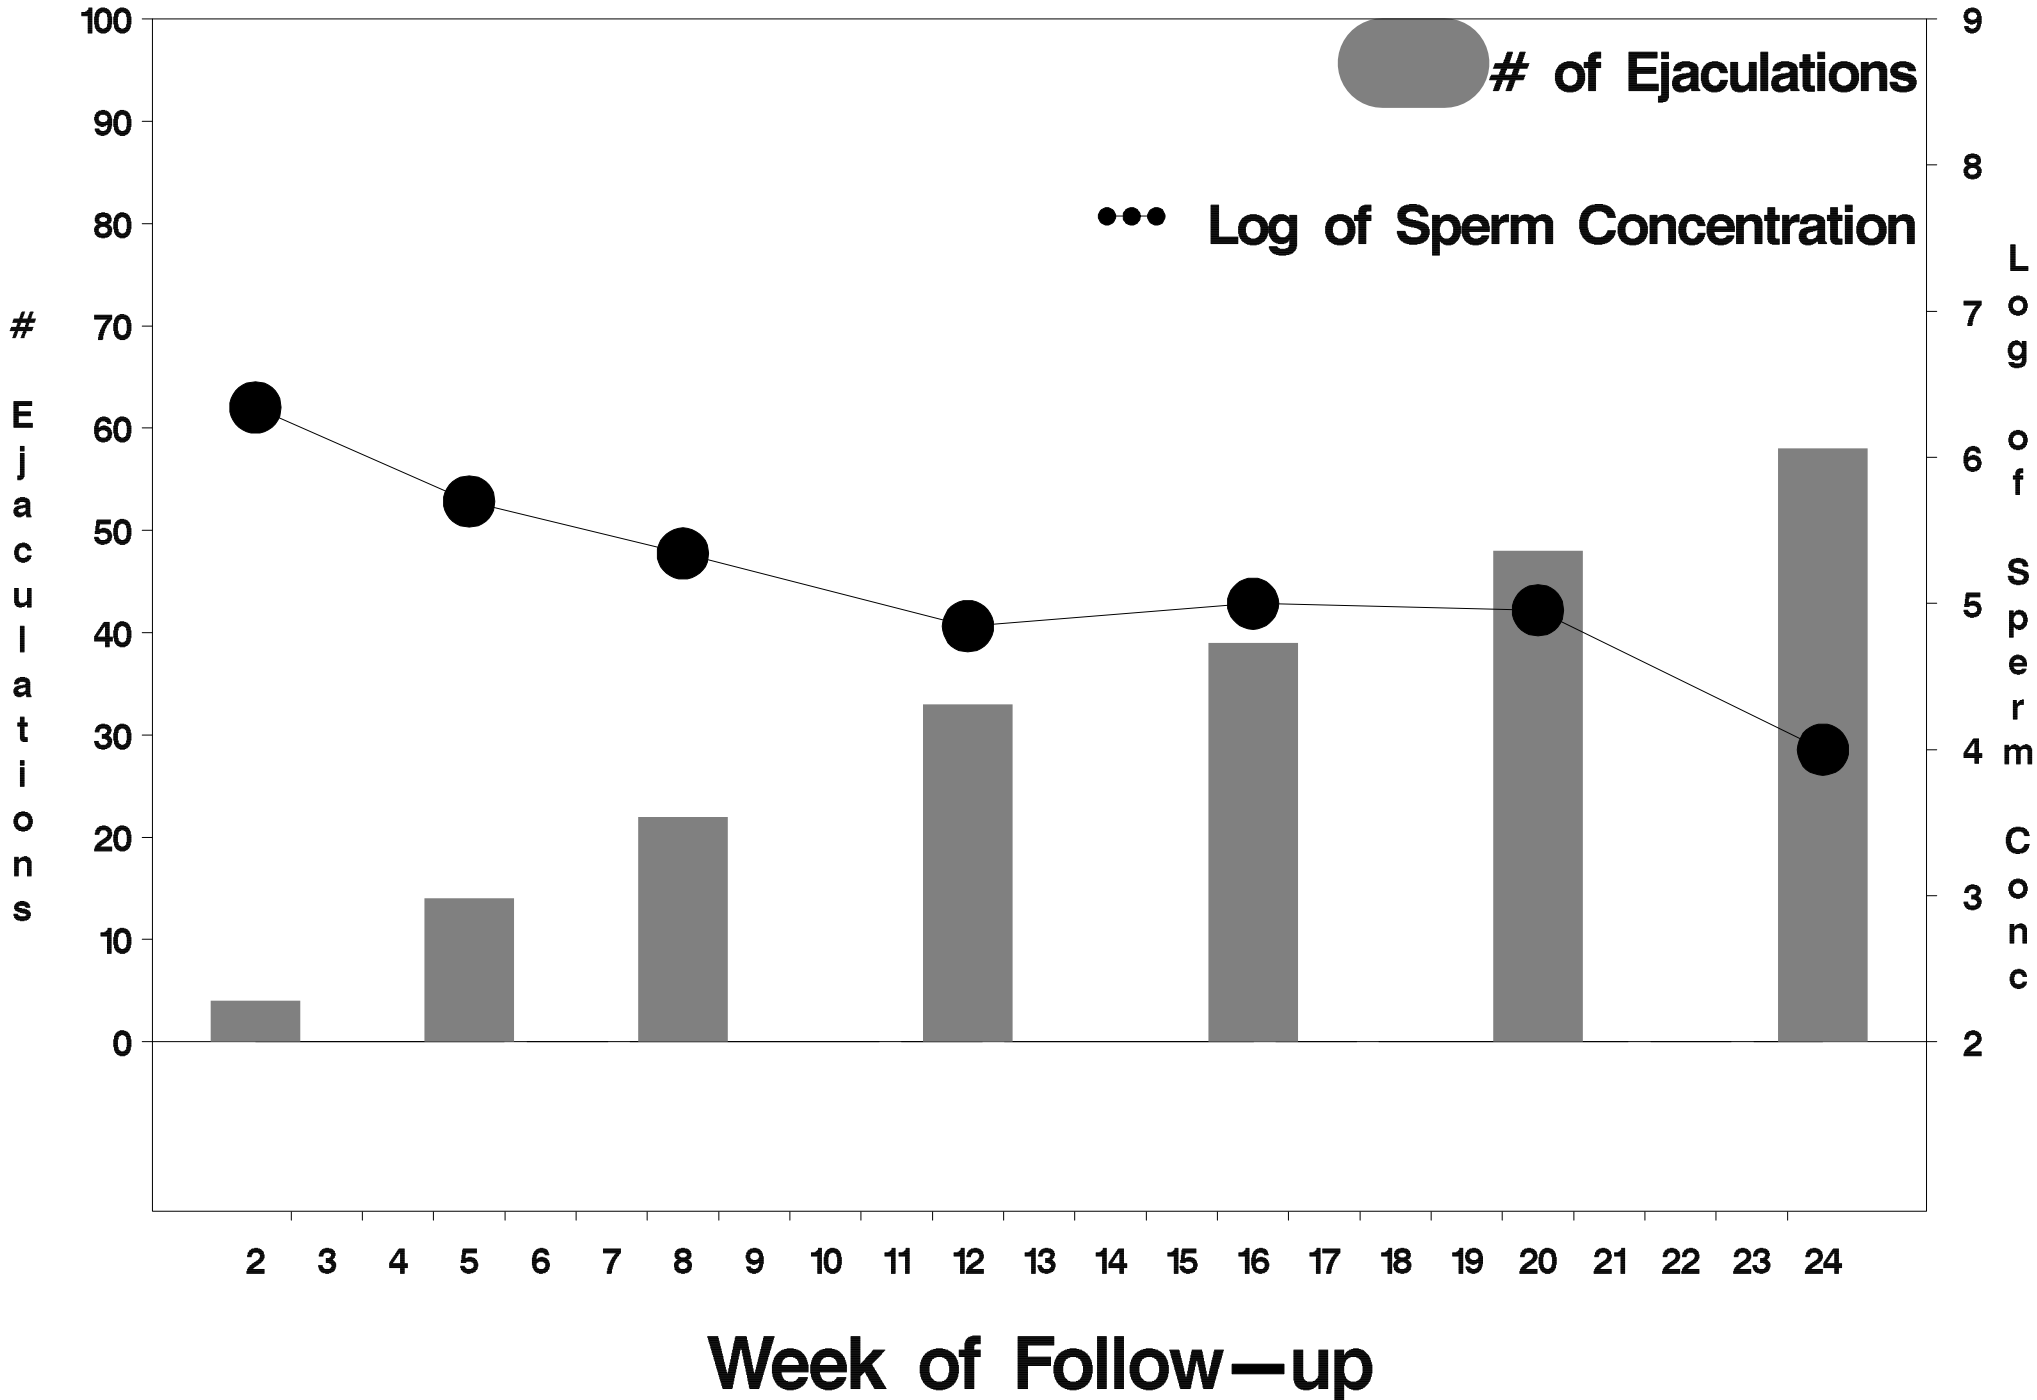

# Participant number= 115

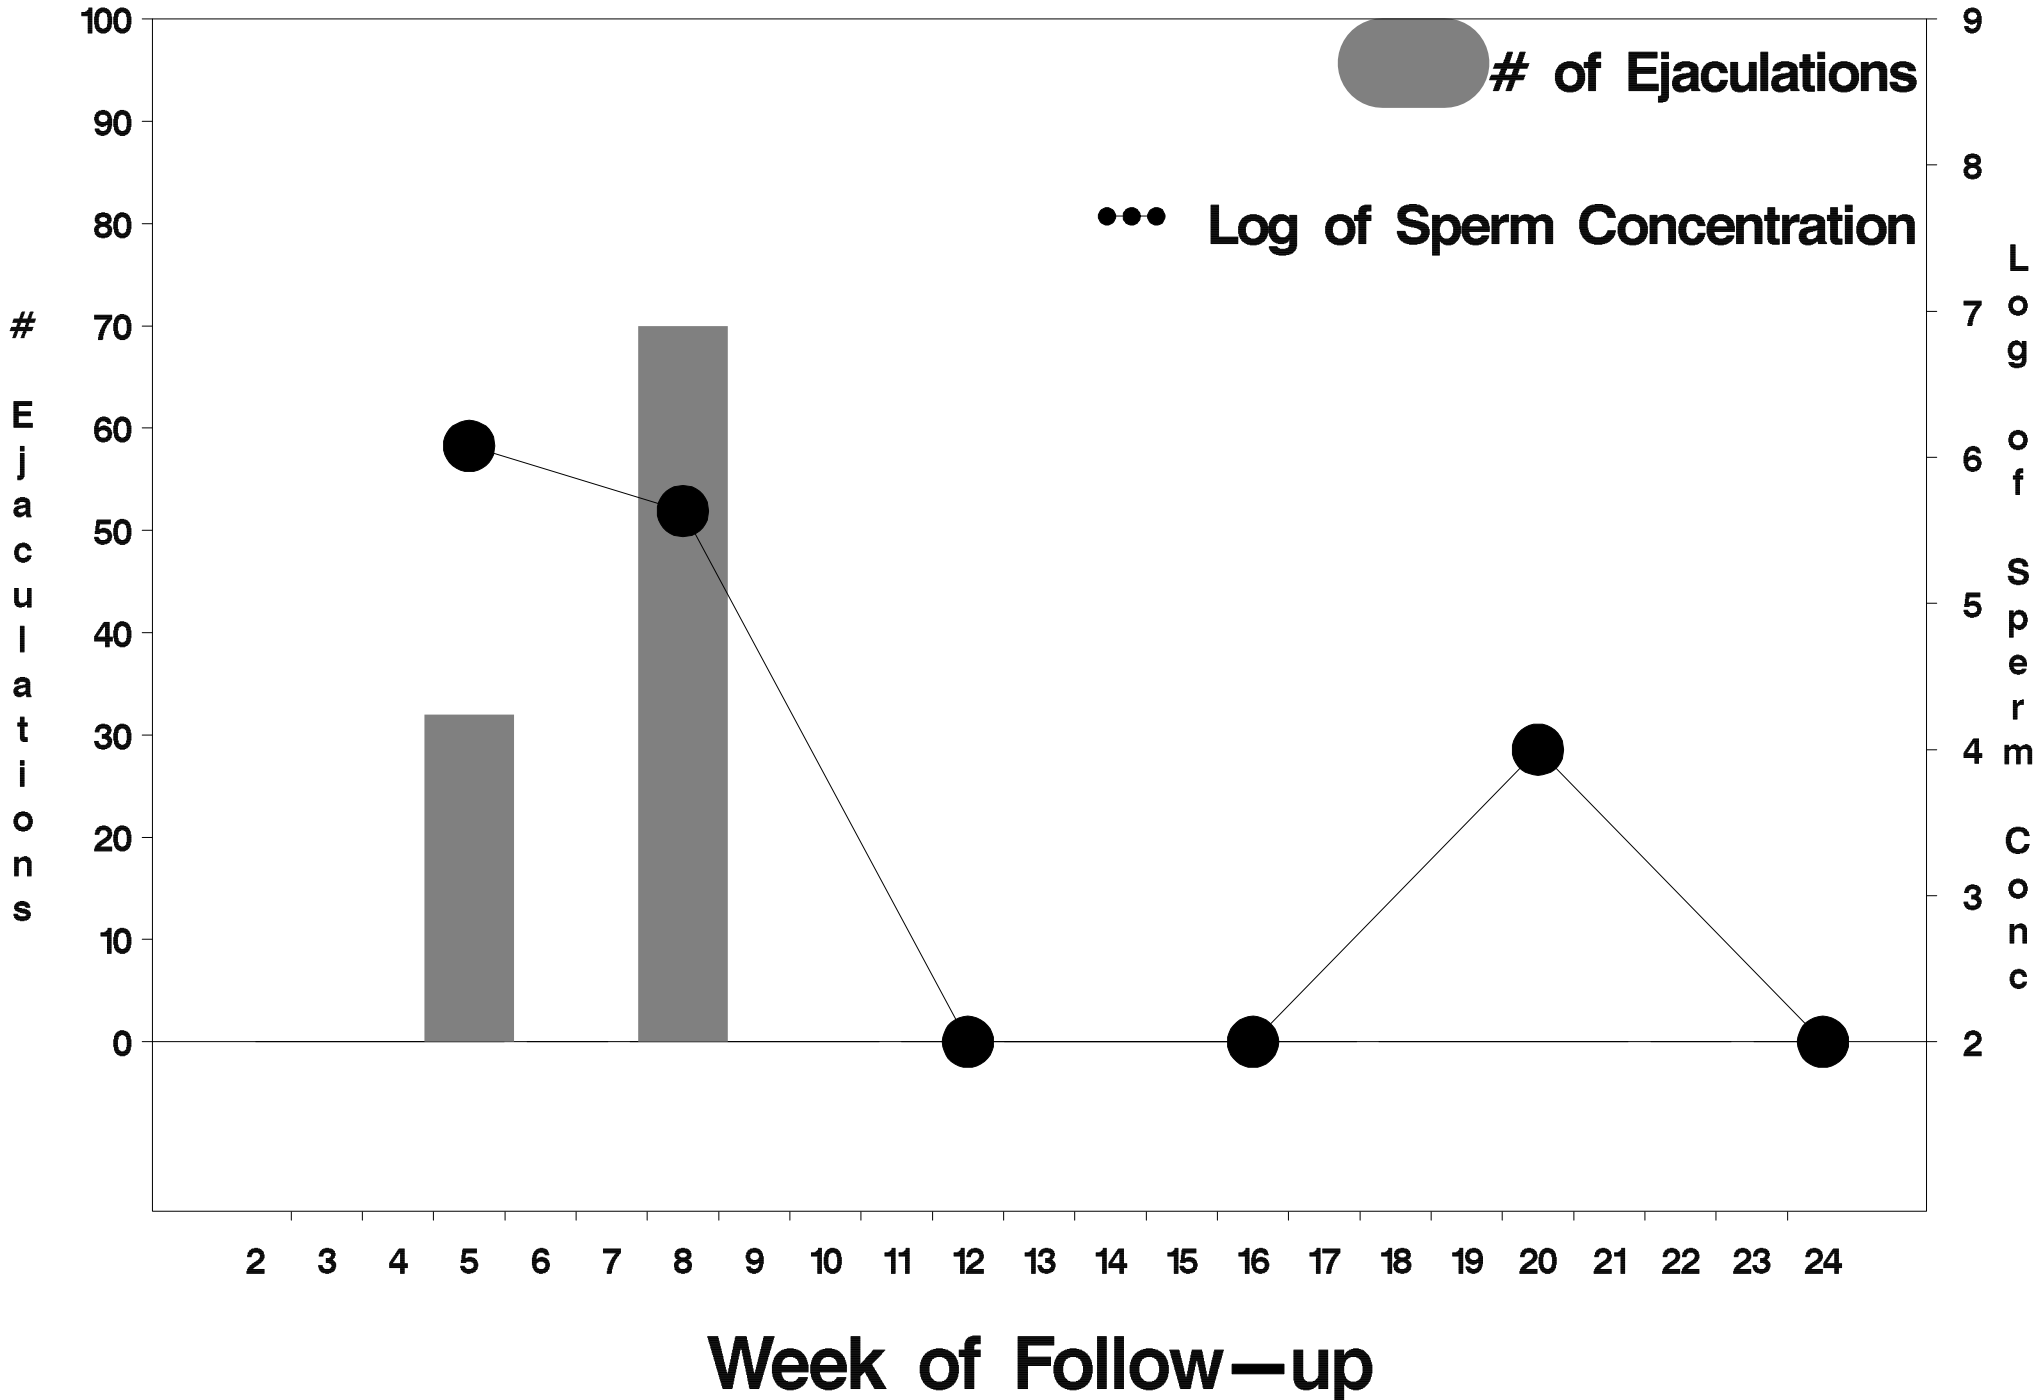

# Participant number= 116

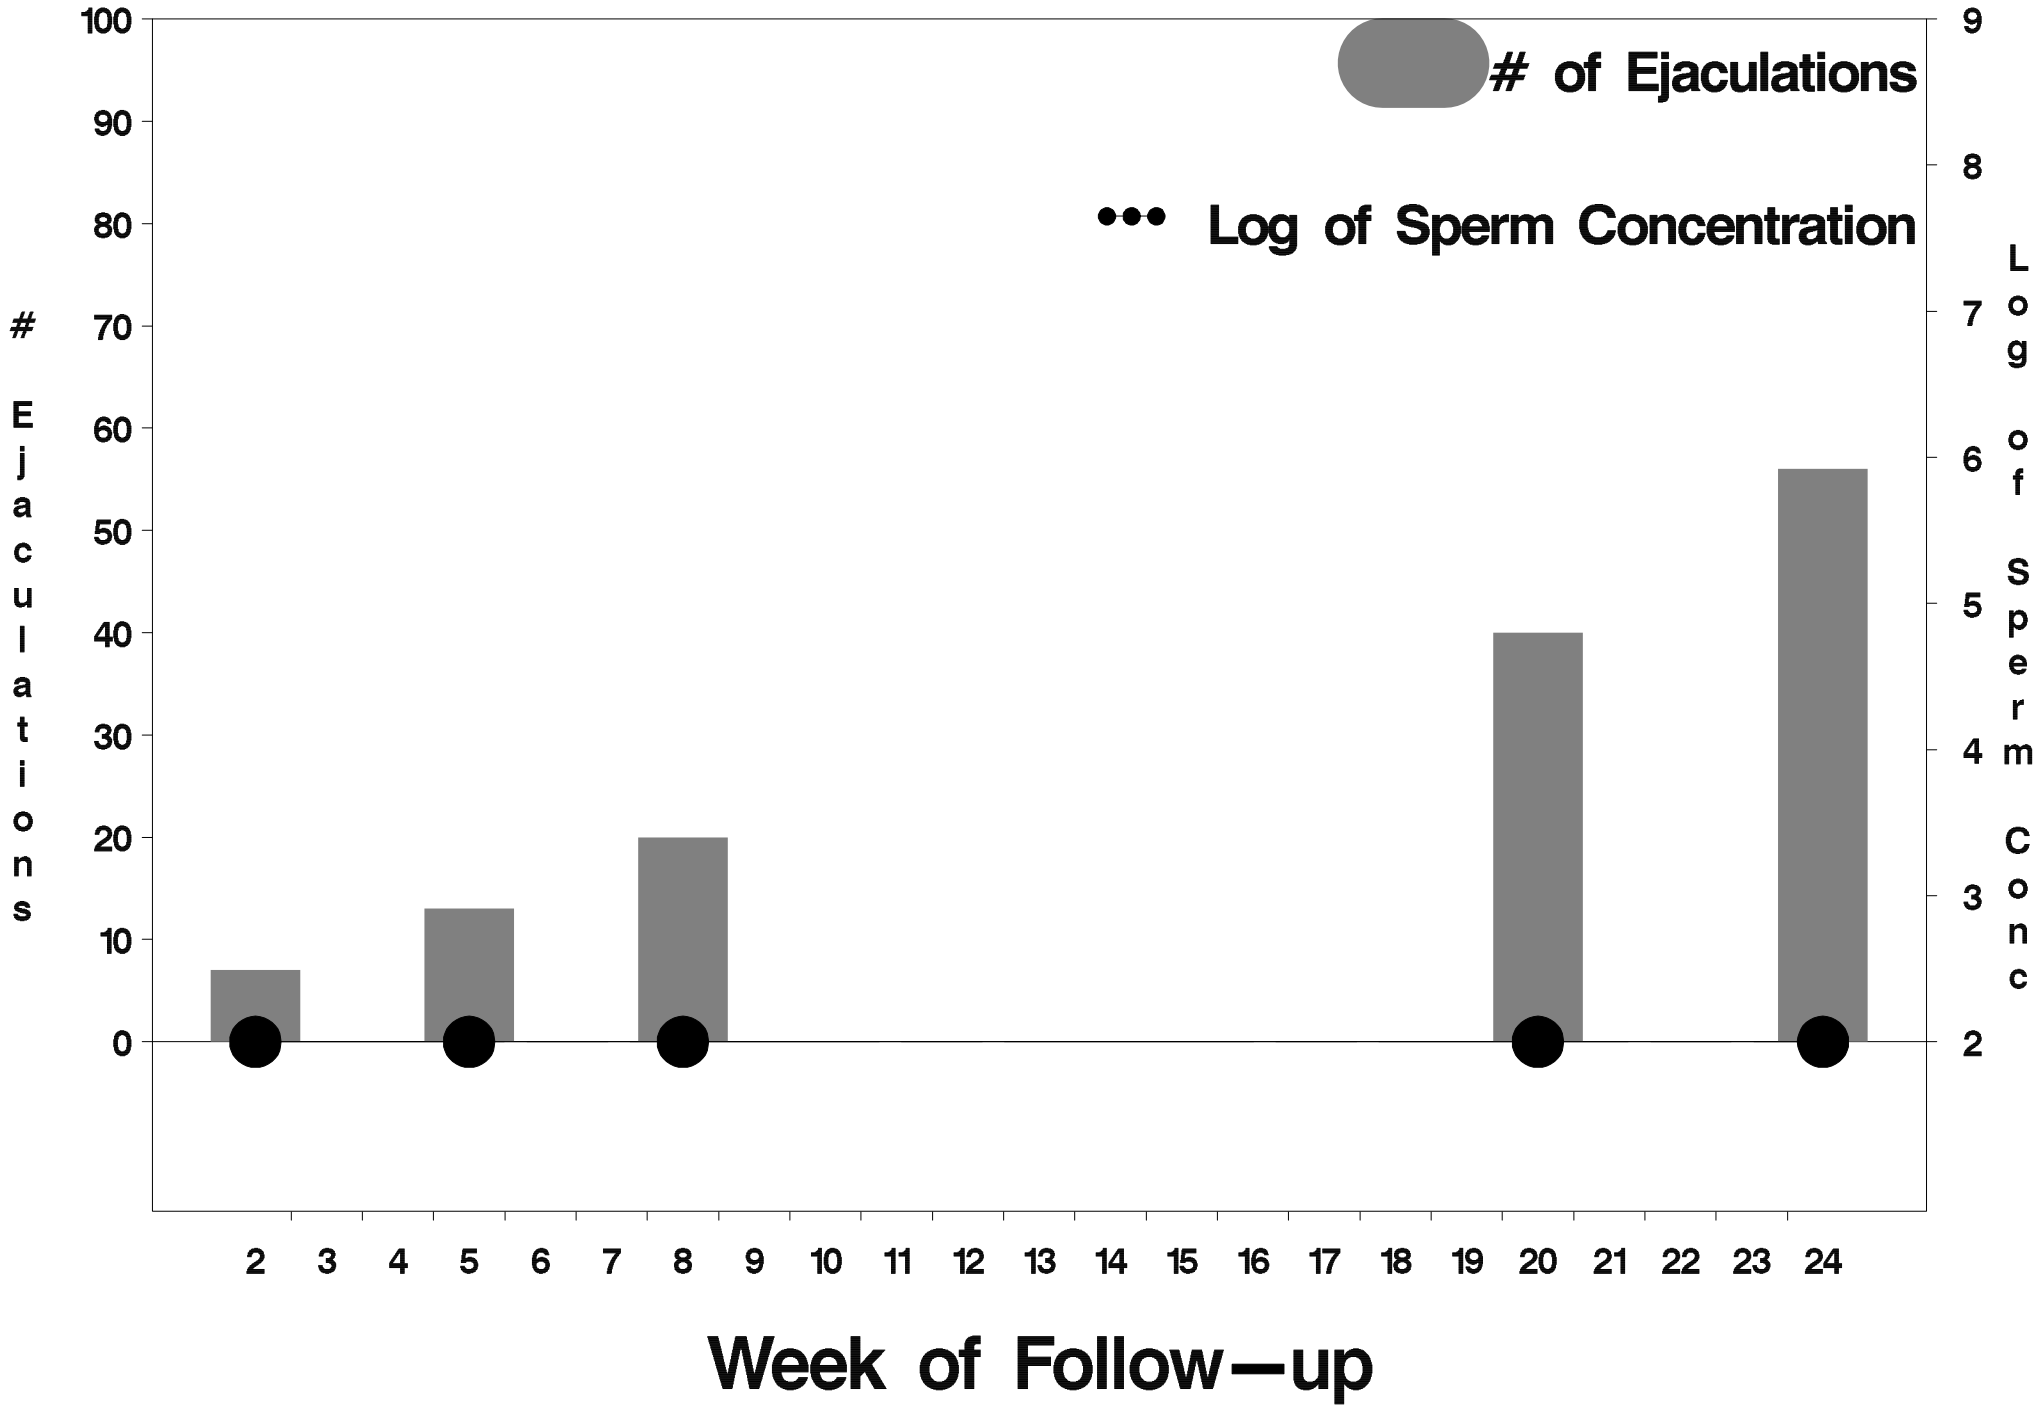



# Participant number= 117

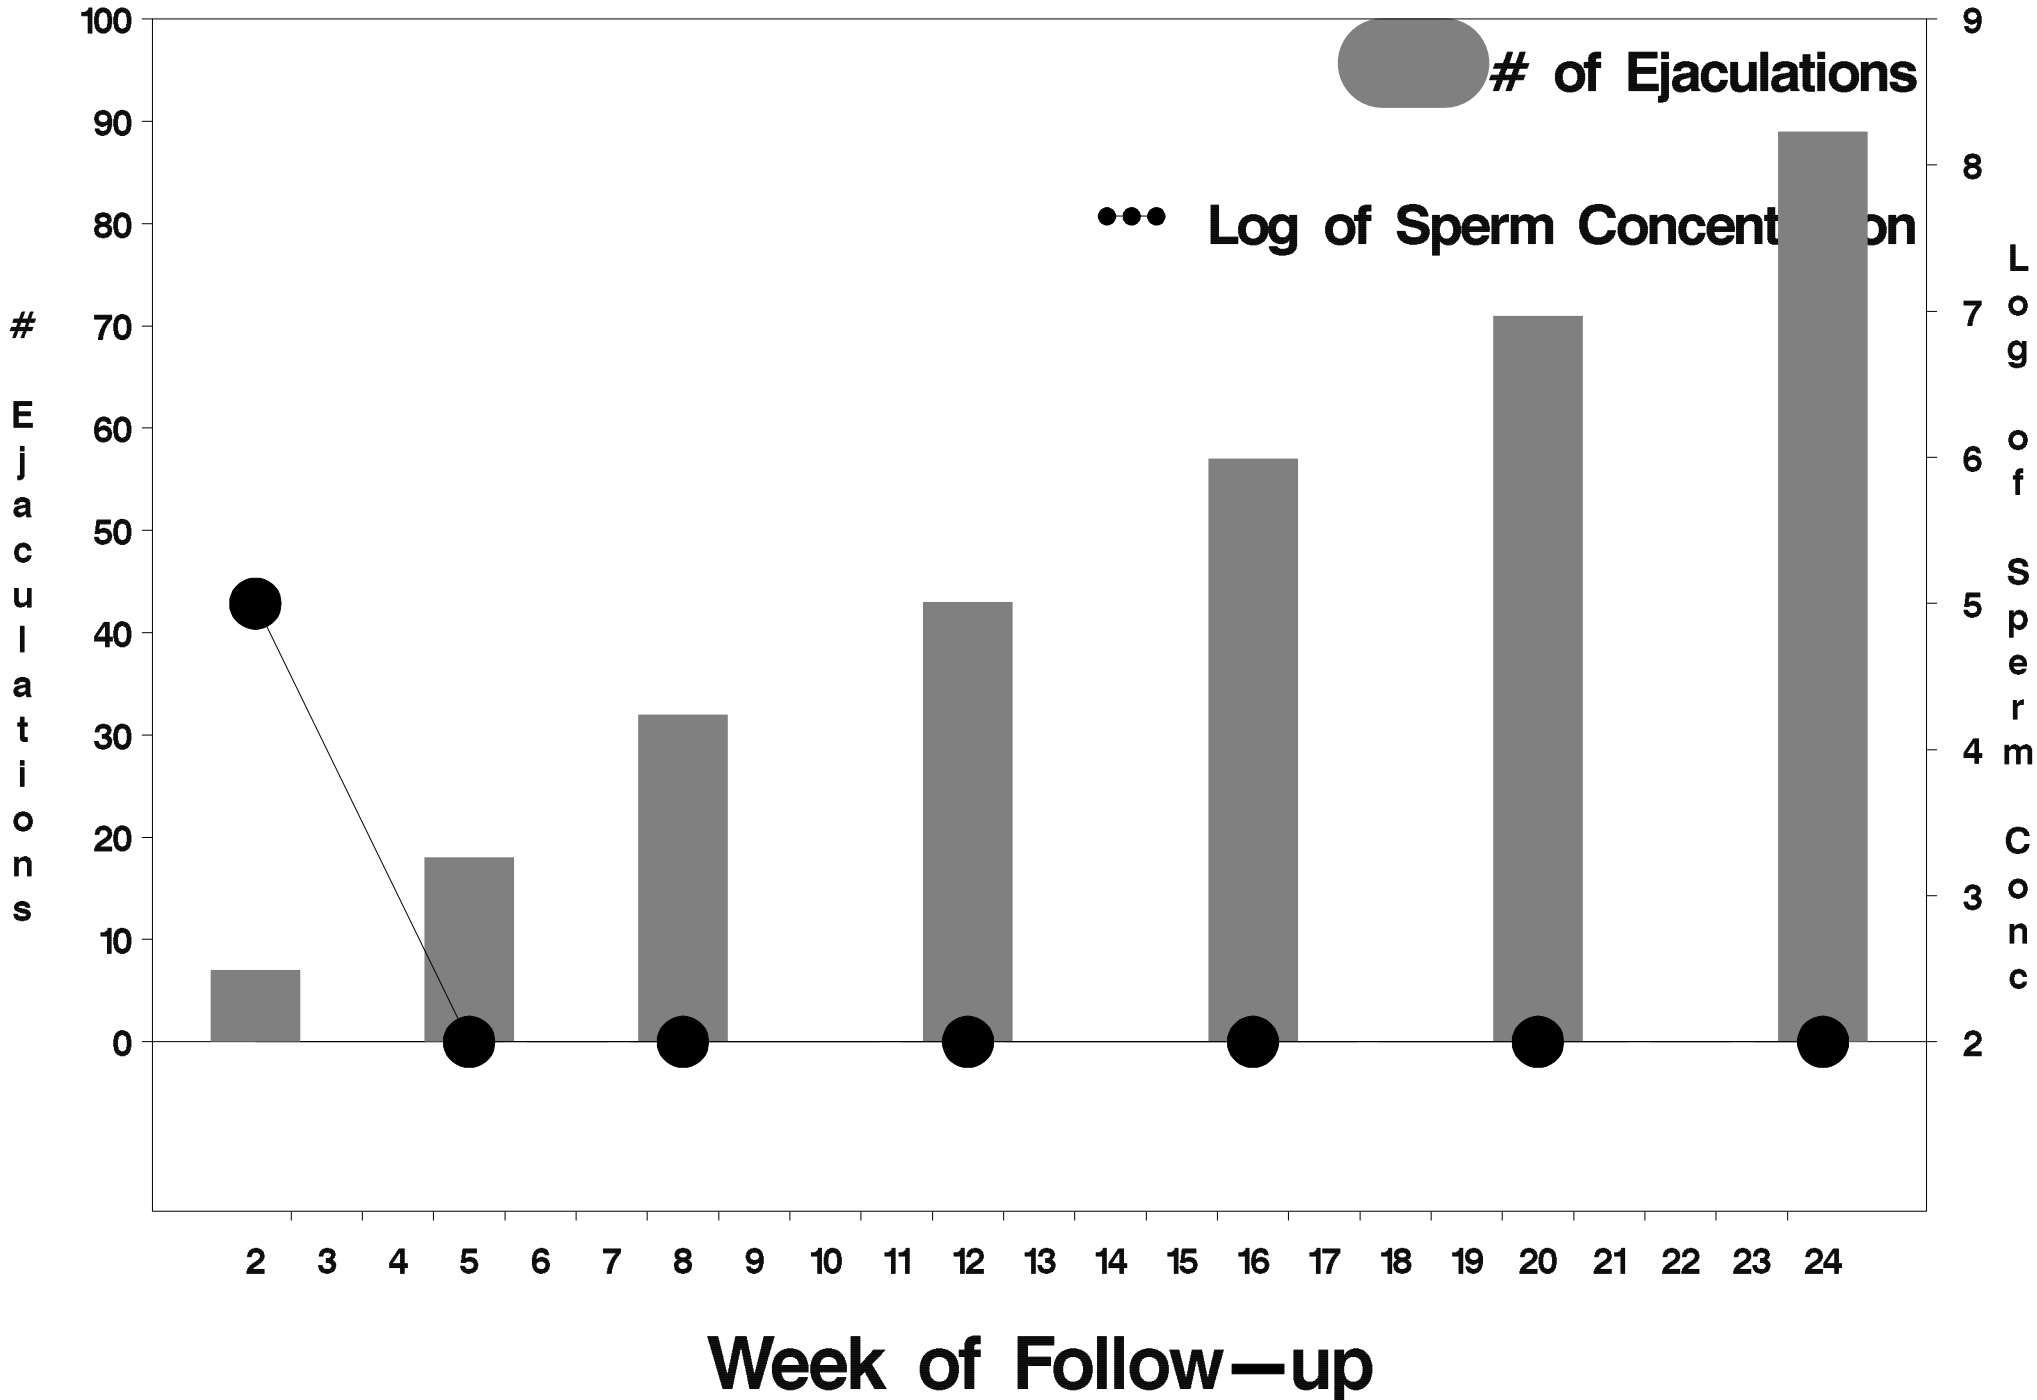

# Participant number= 118

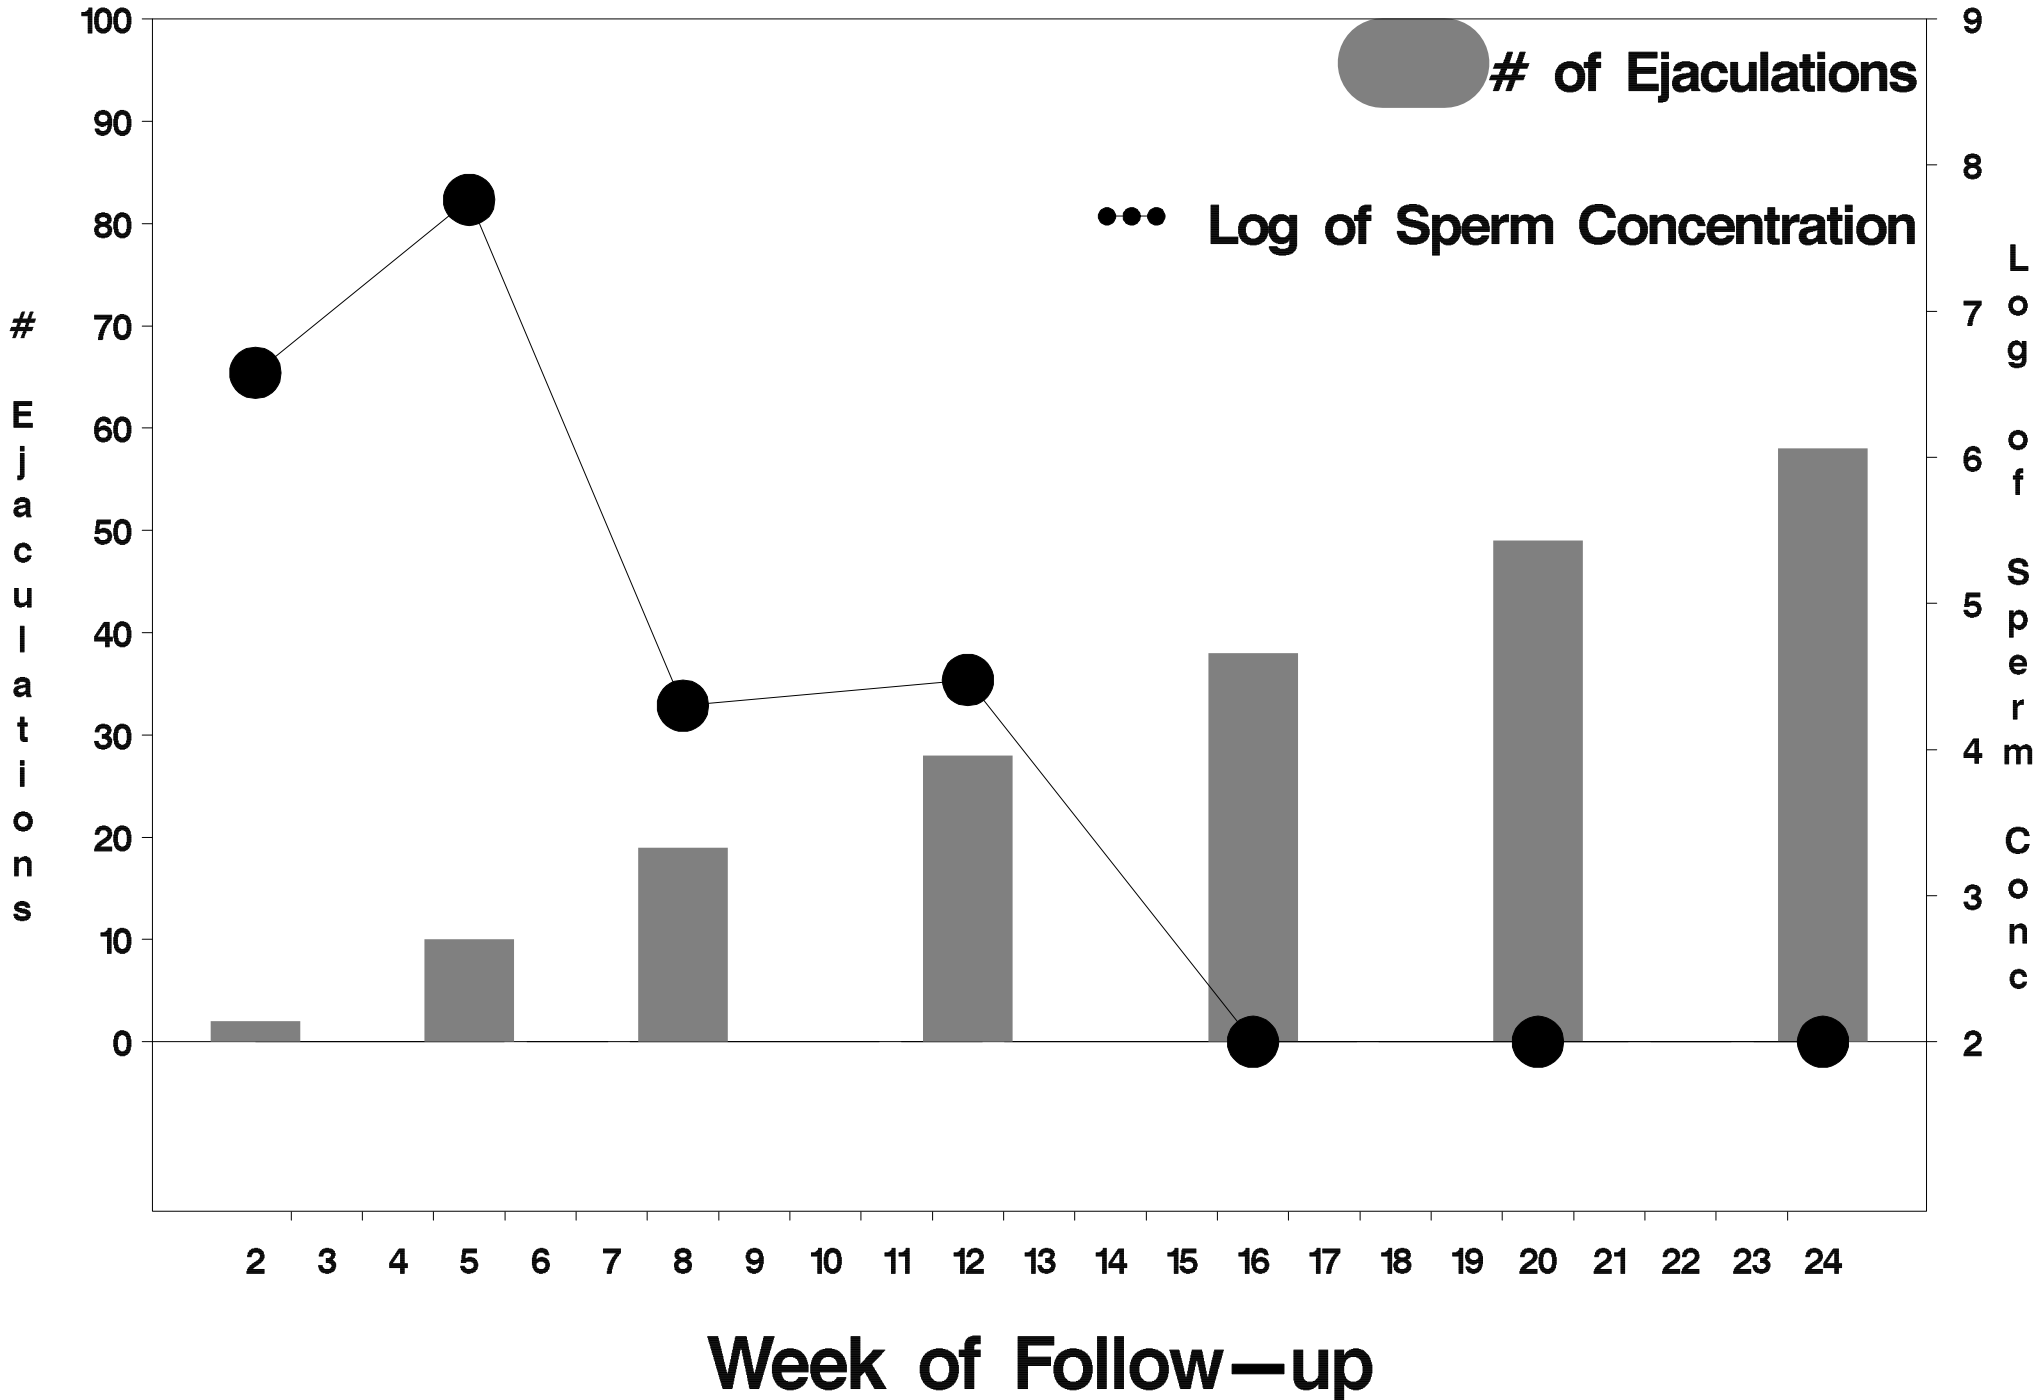

# Participant number= 119

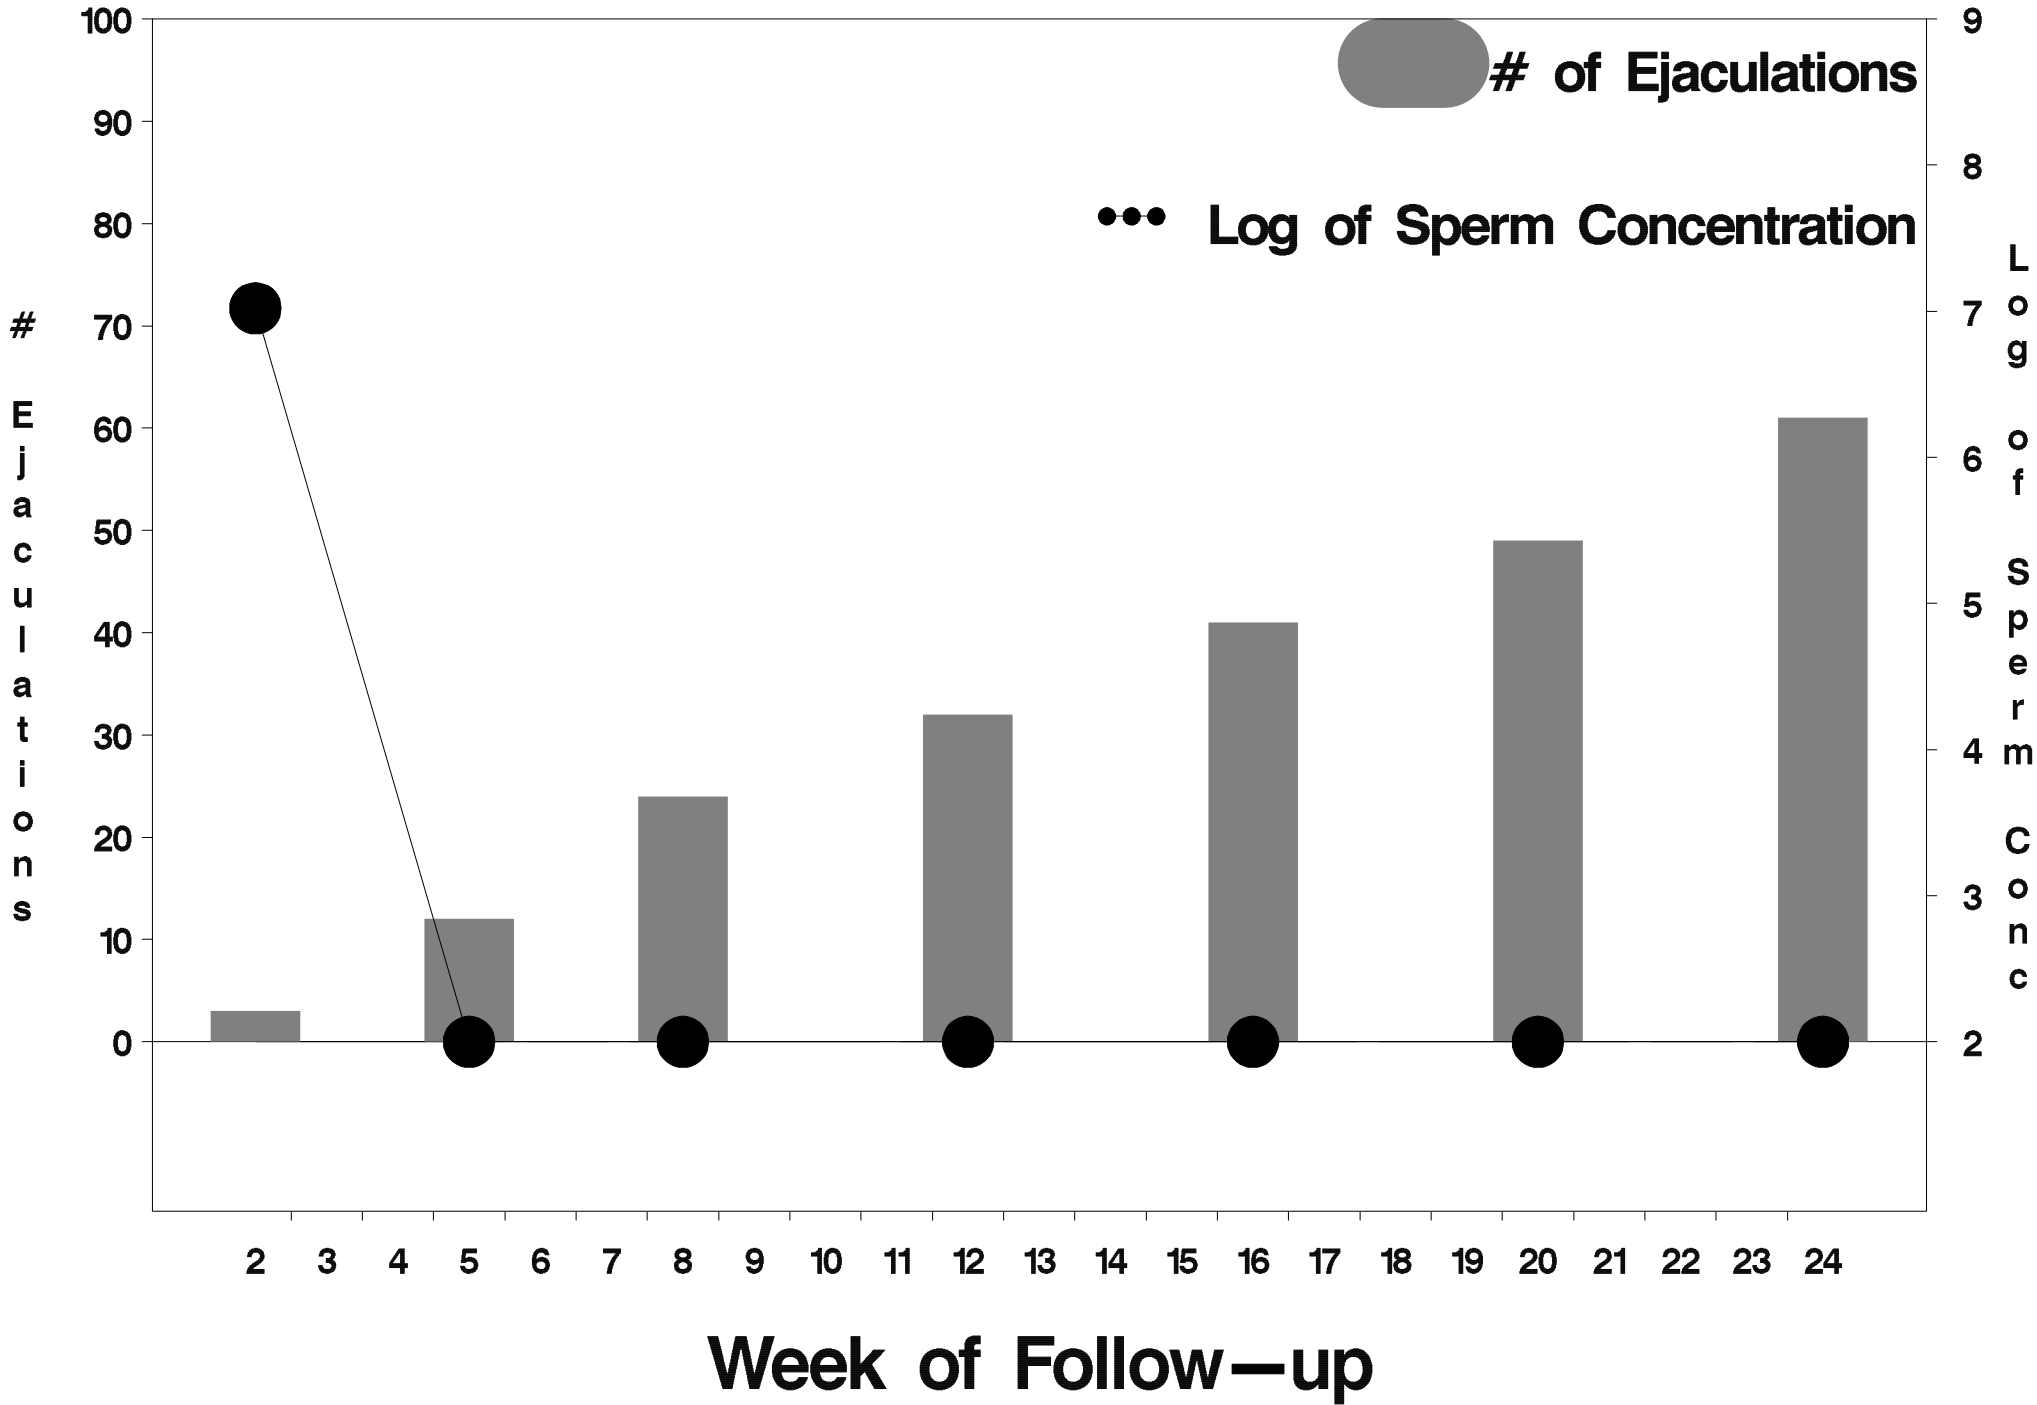

# Participant number= 120

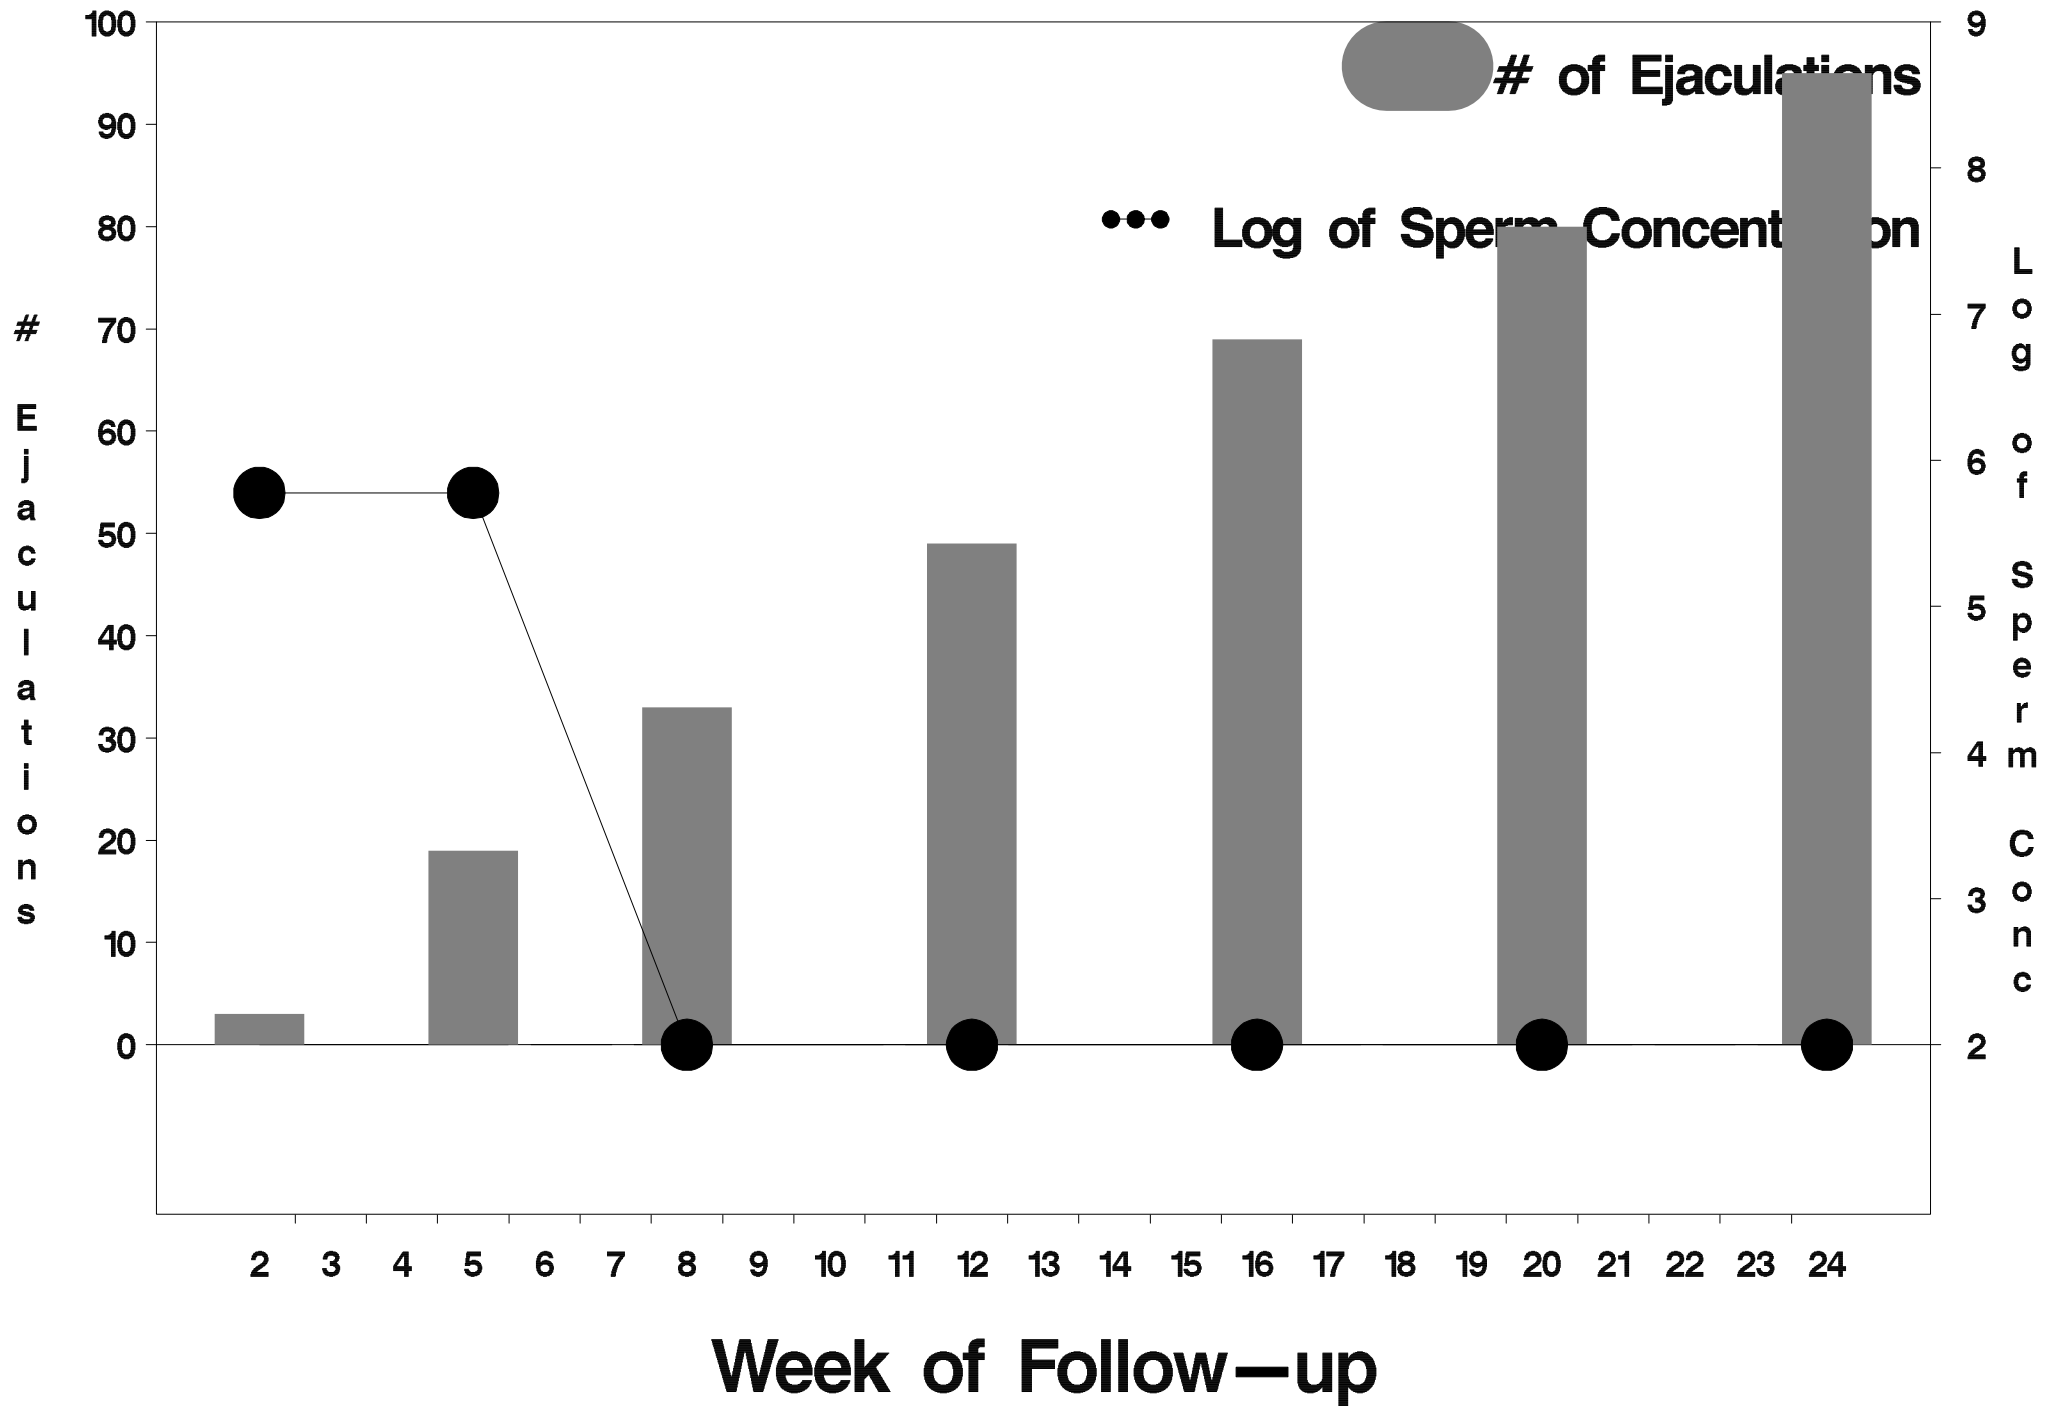

# Participant number= 121

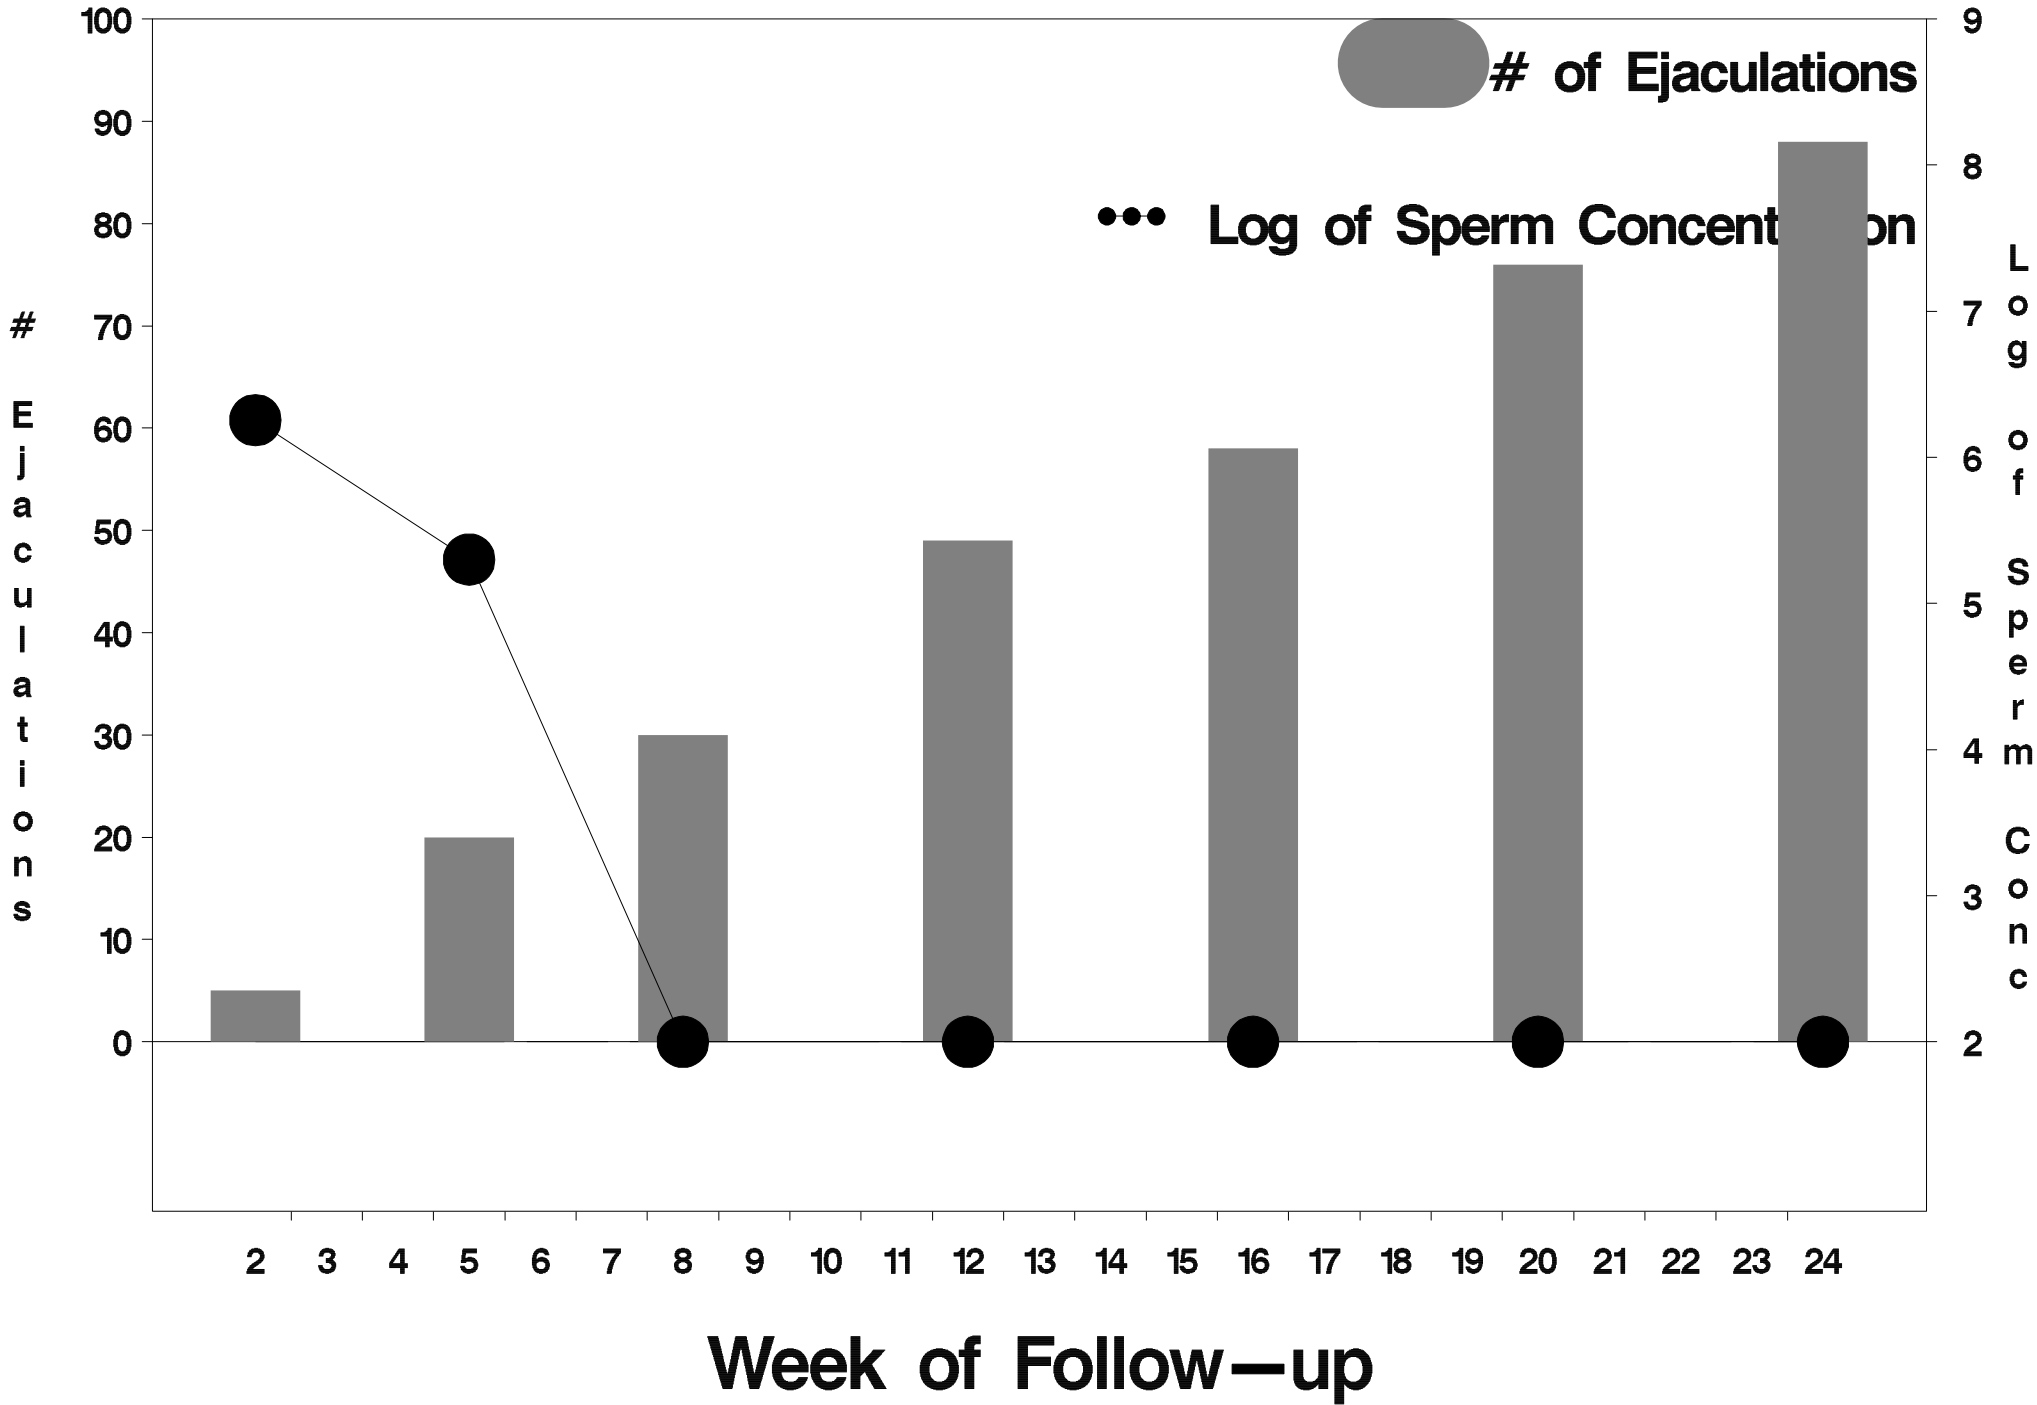

# Participant number= 122

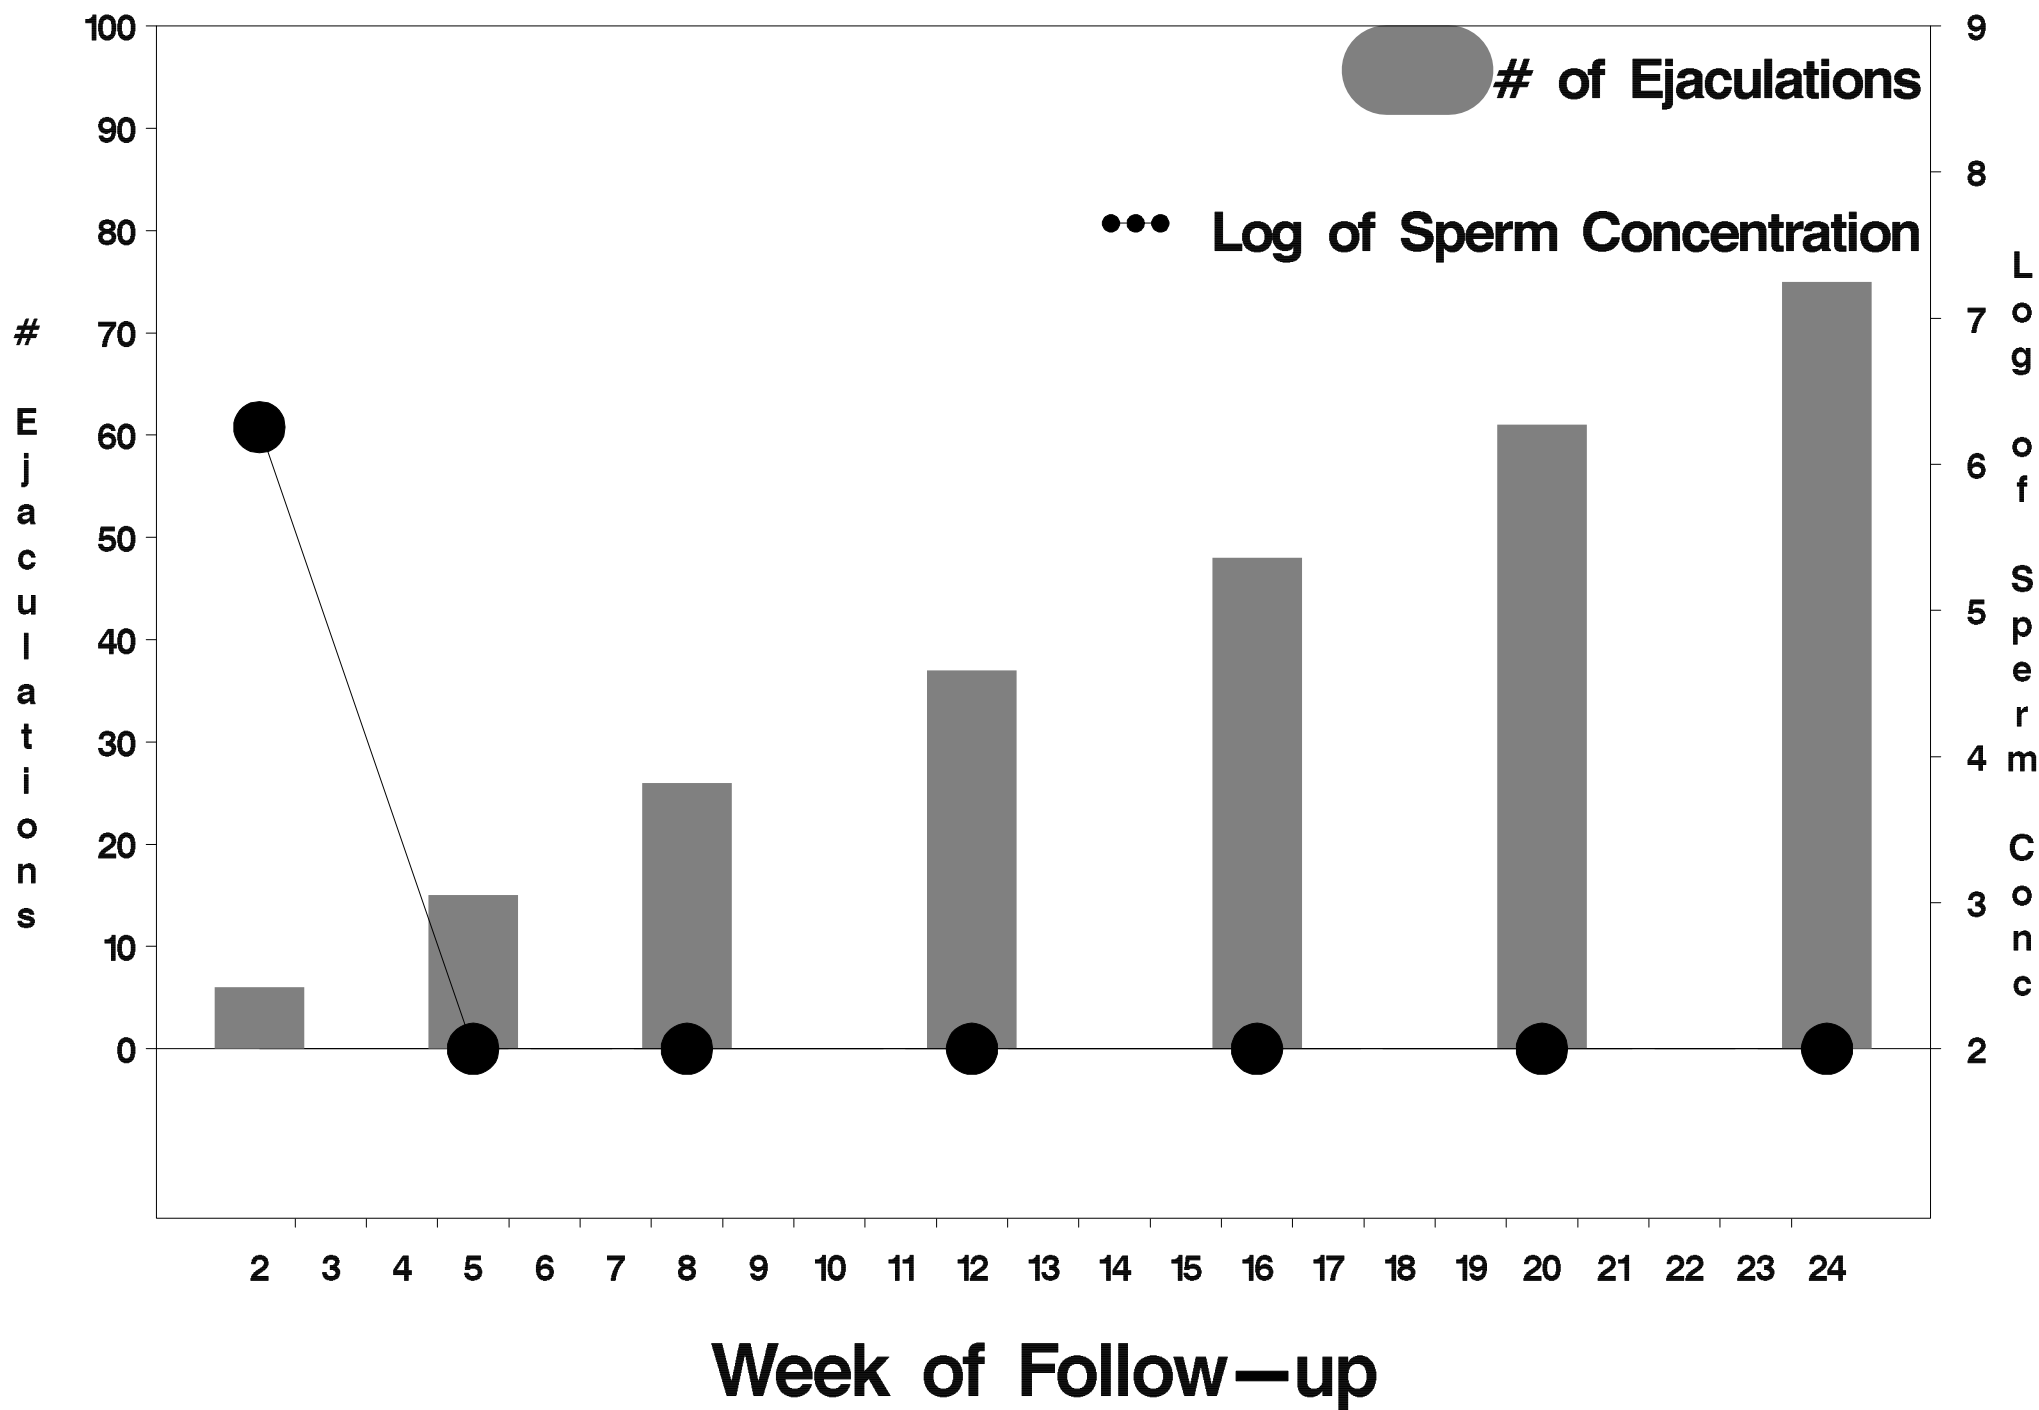

# Participant number= 123

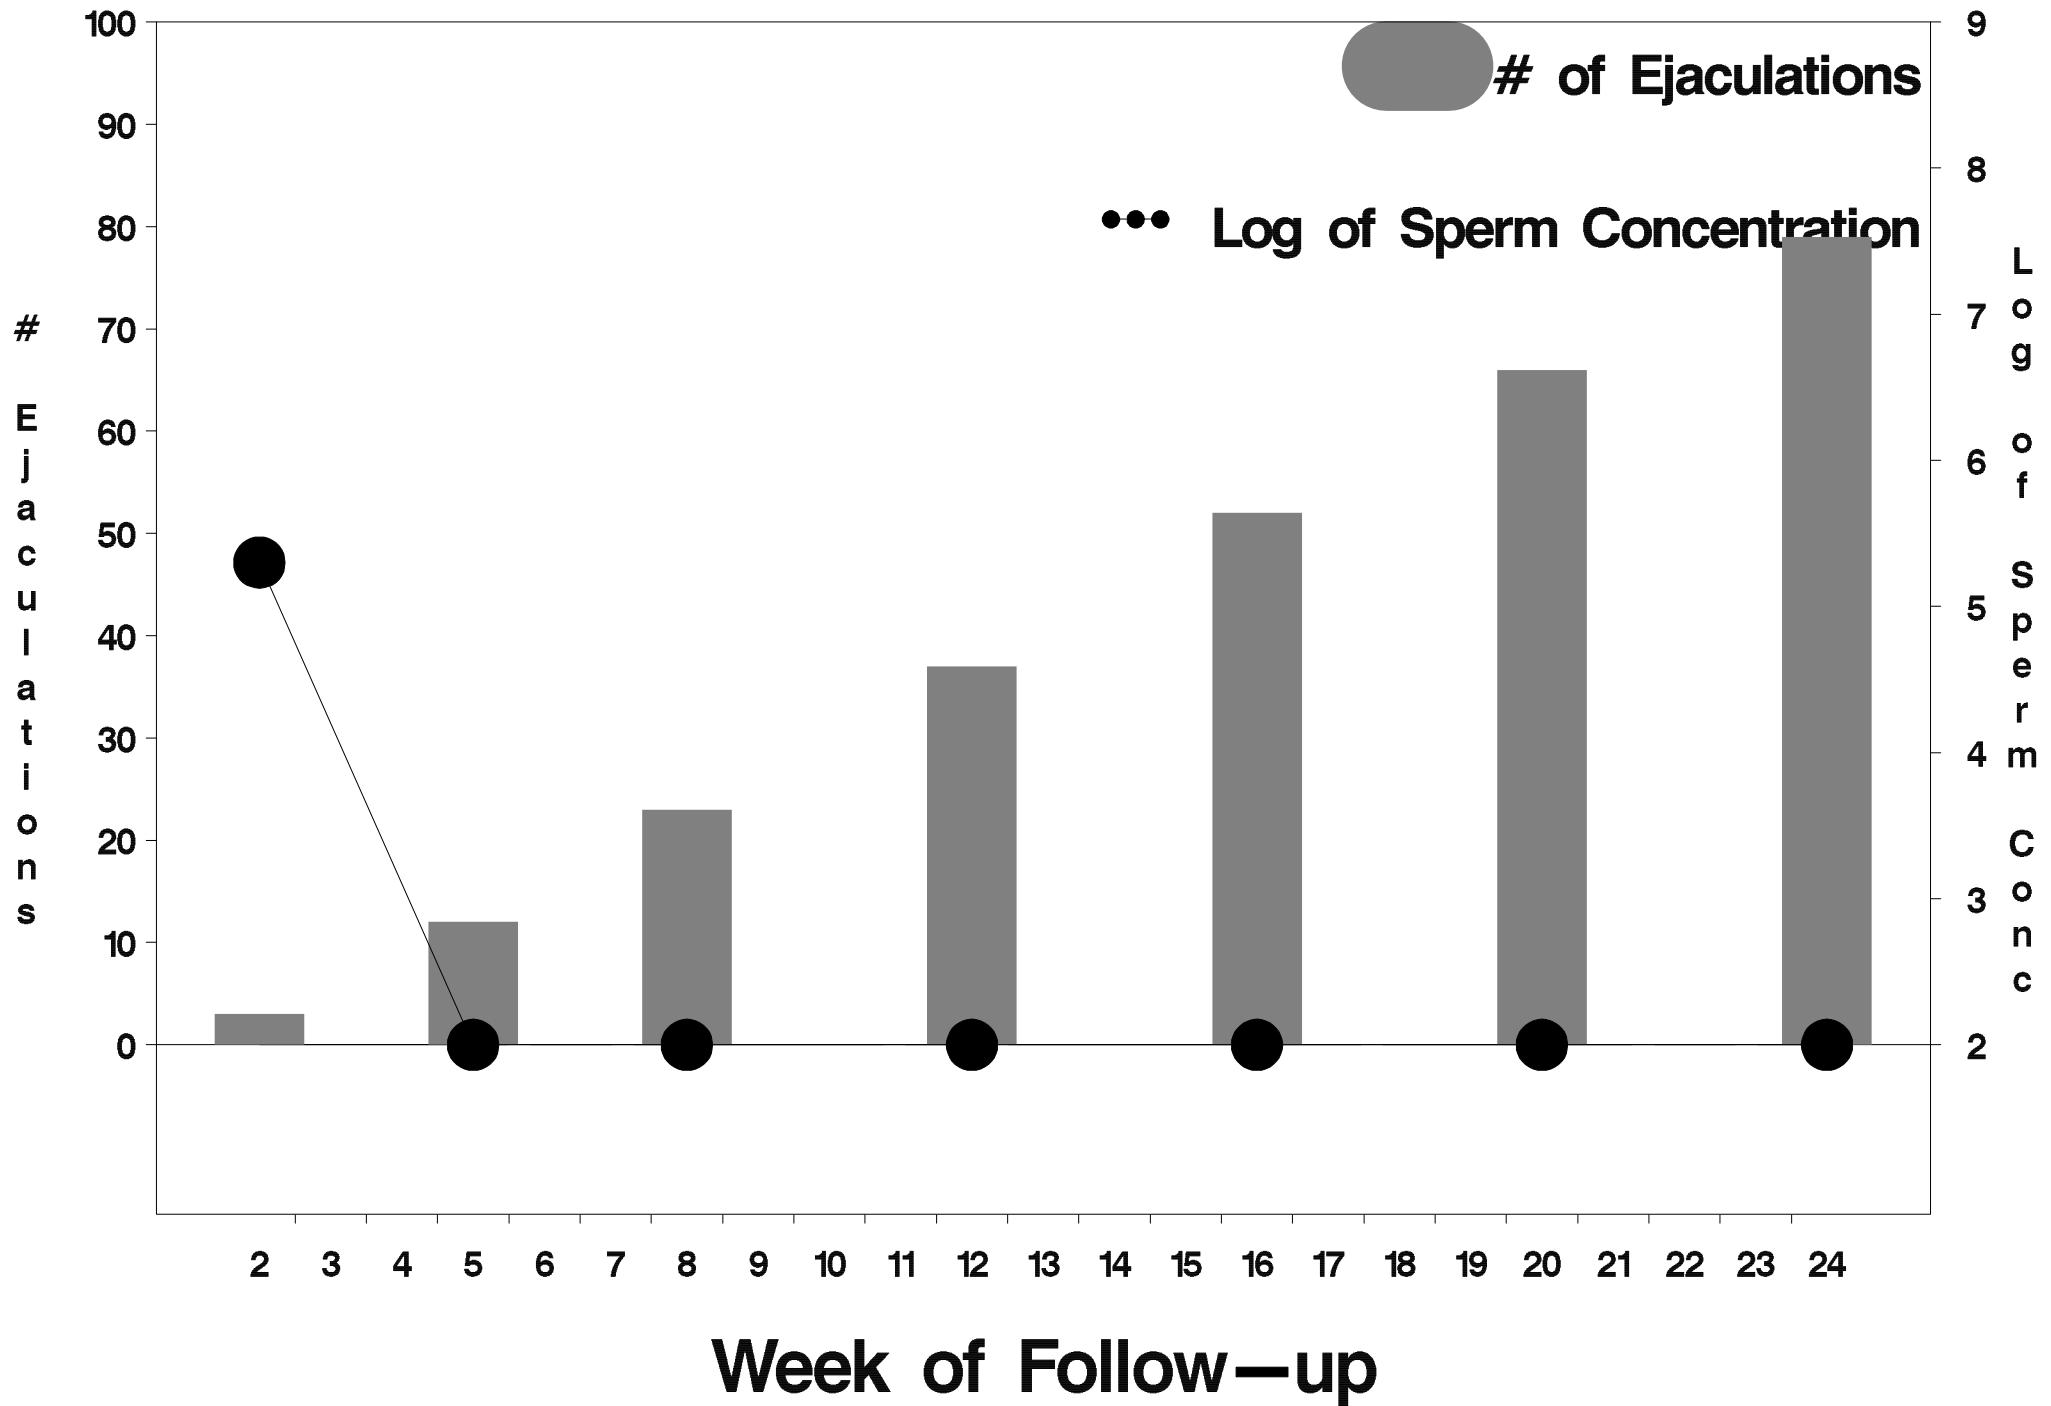

# Participant number= 124

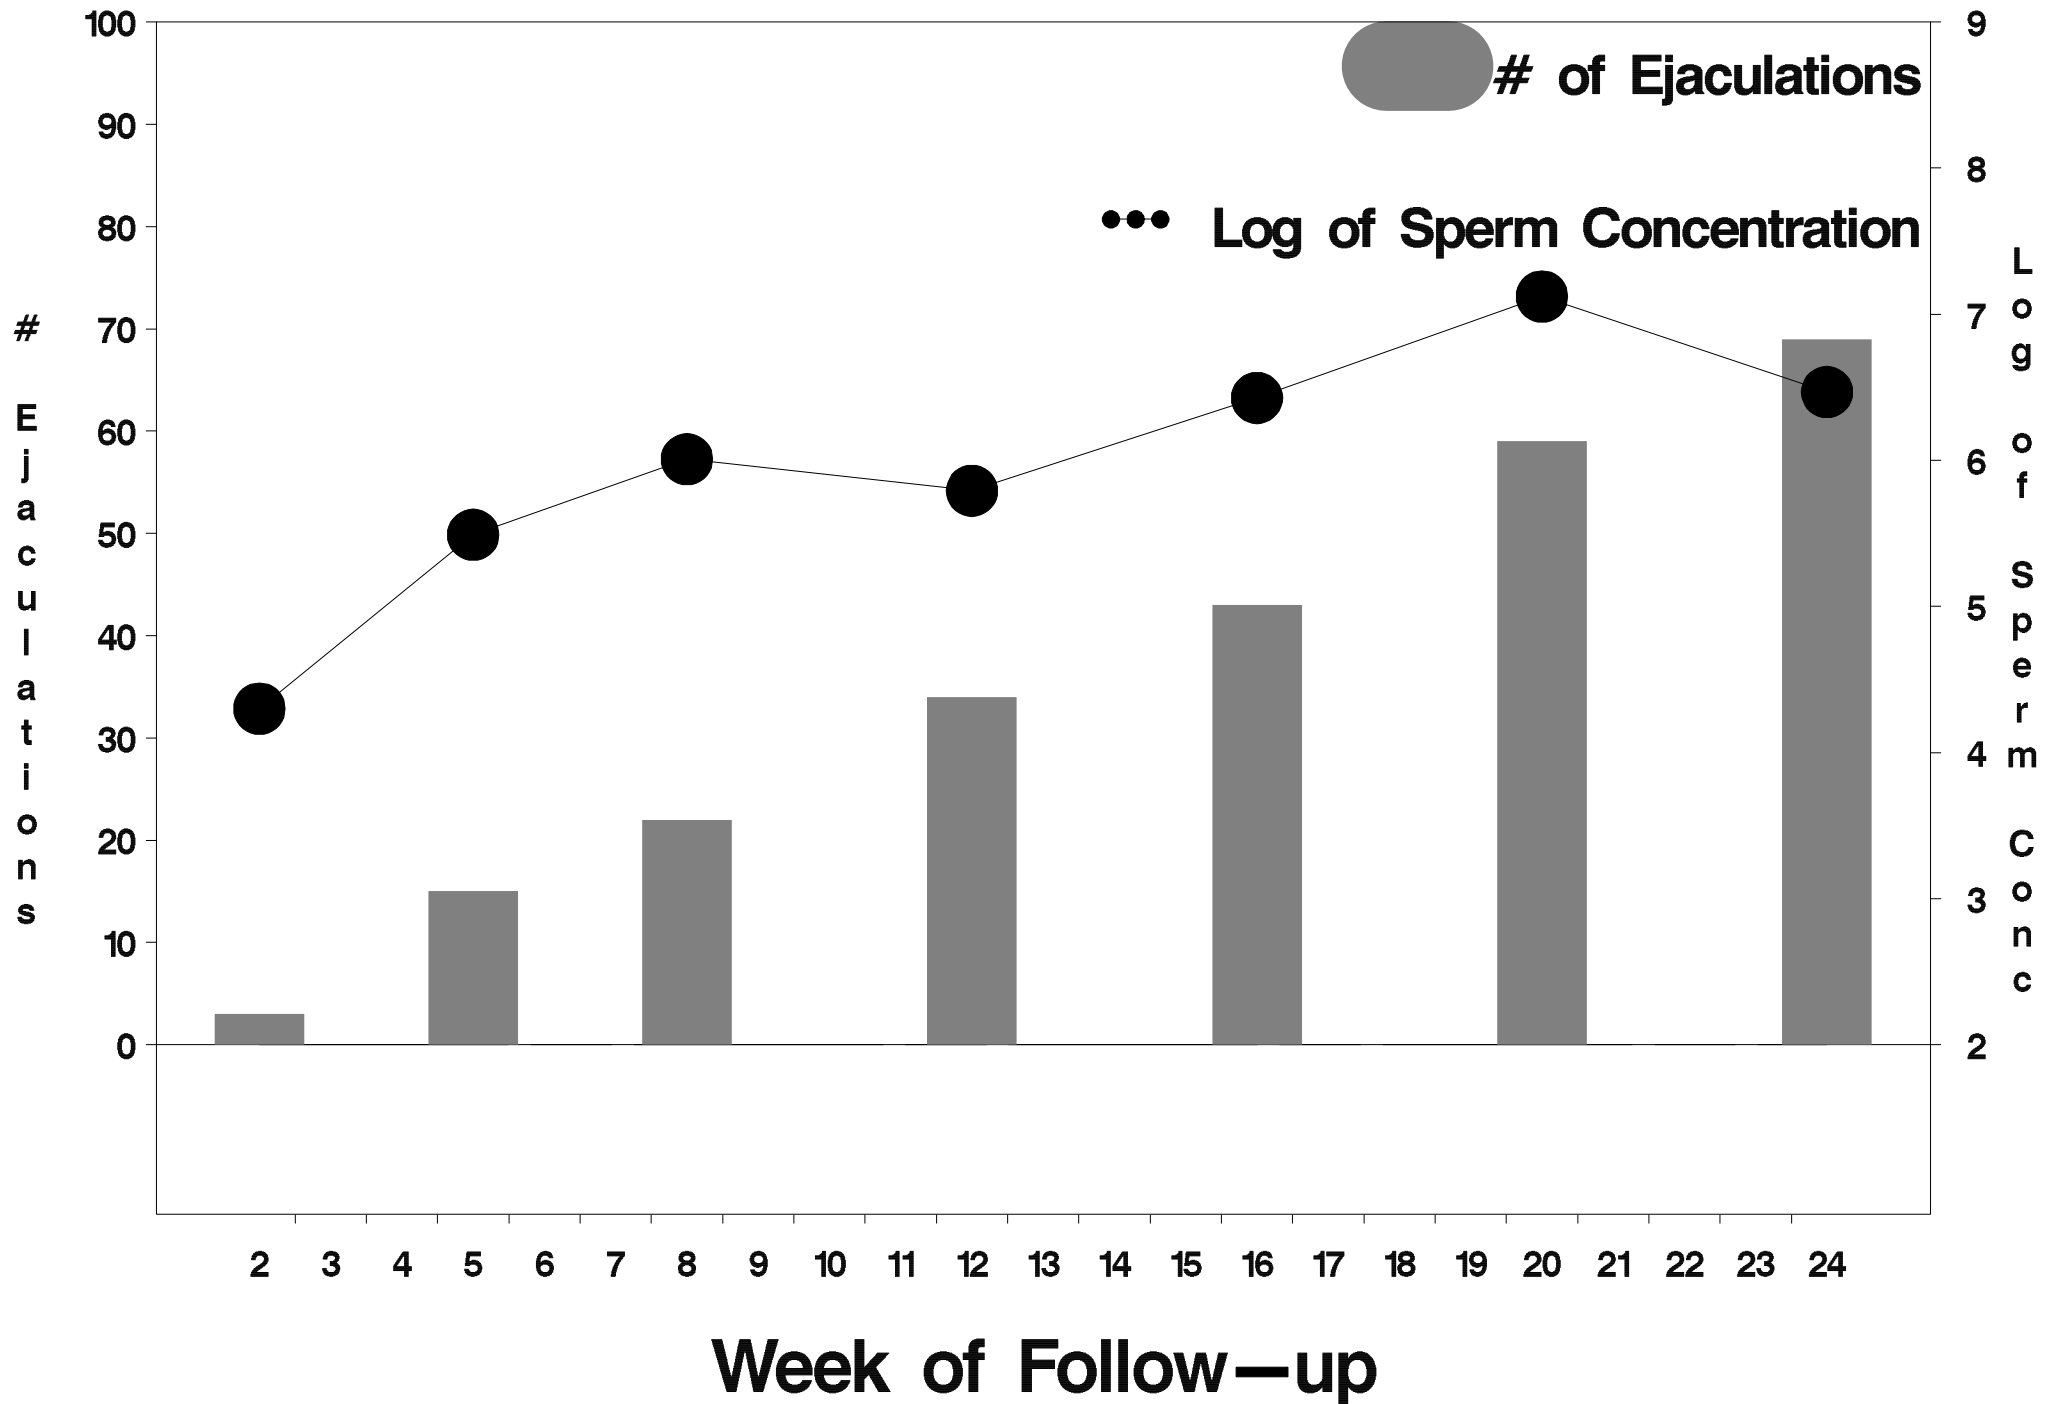



# Participant number= 125

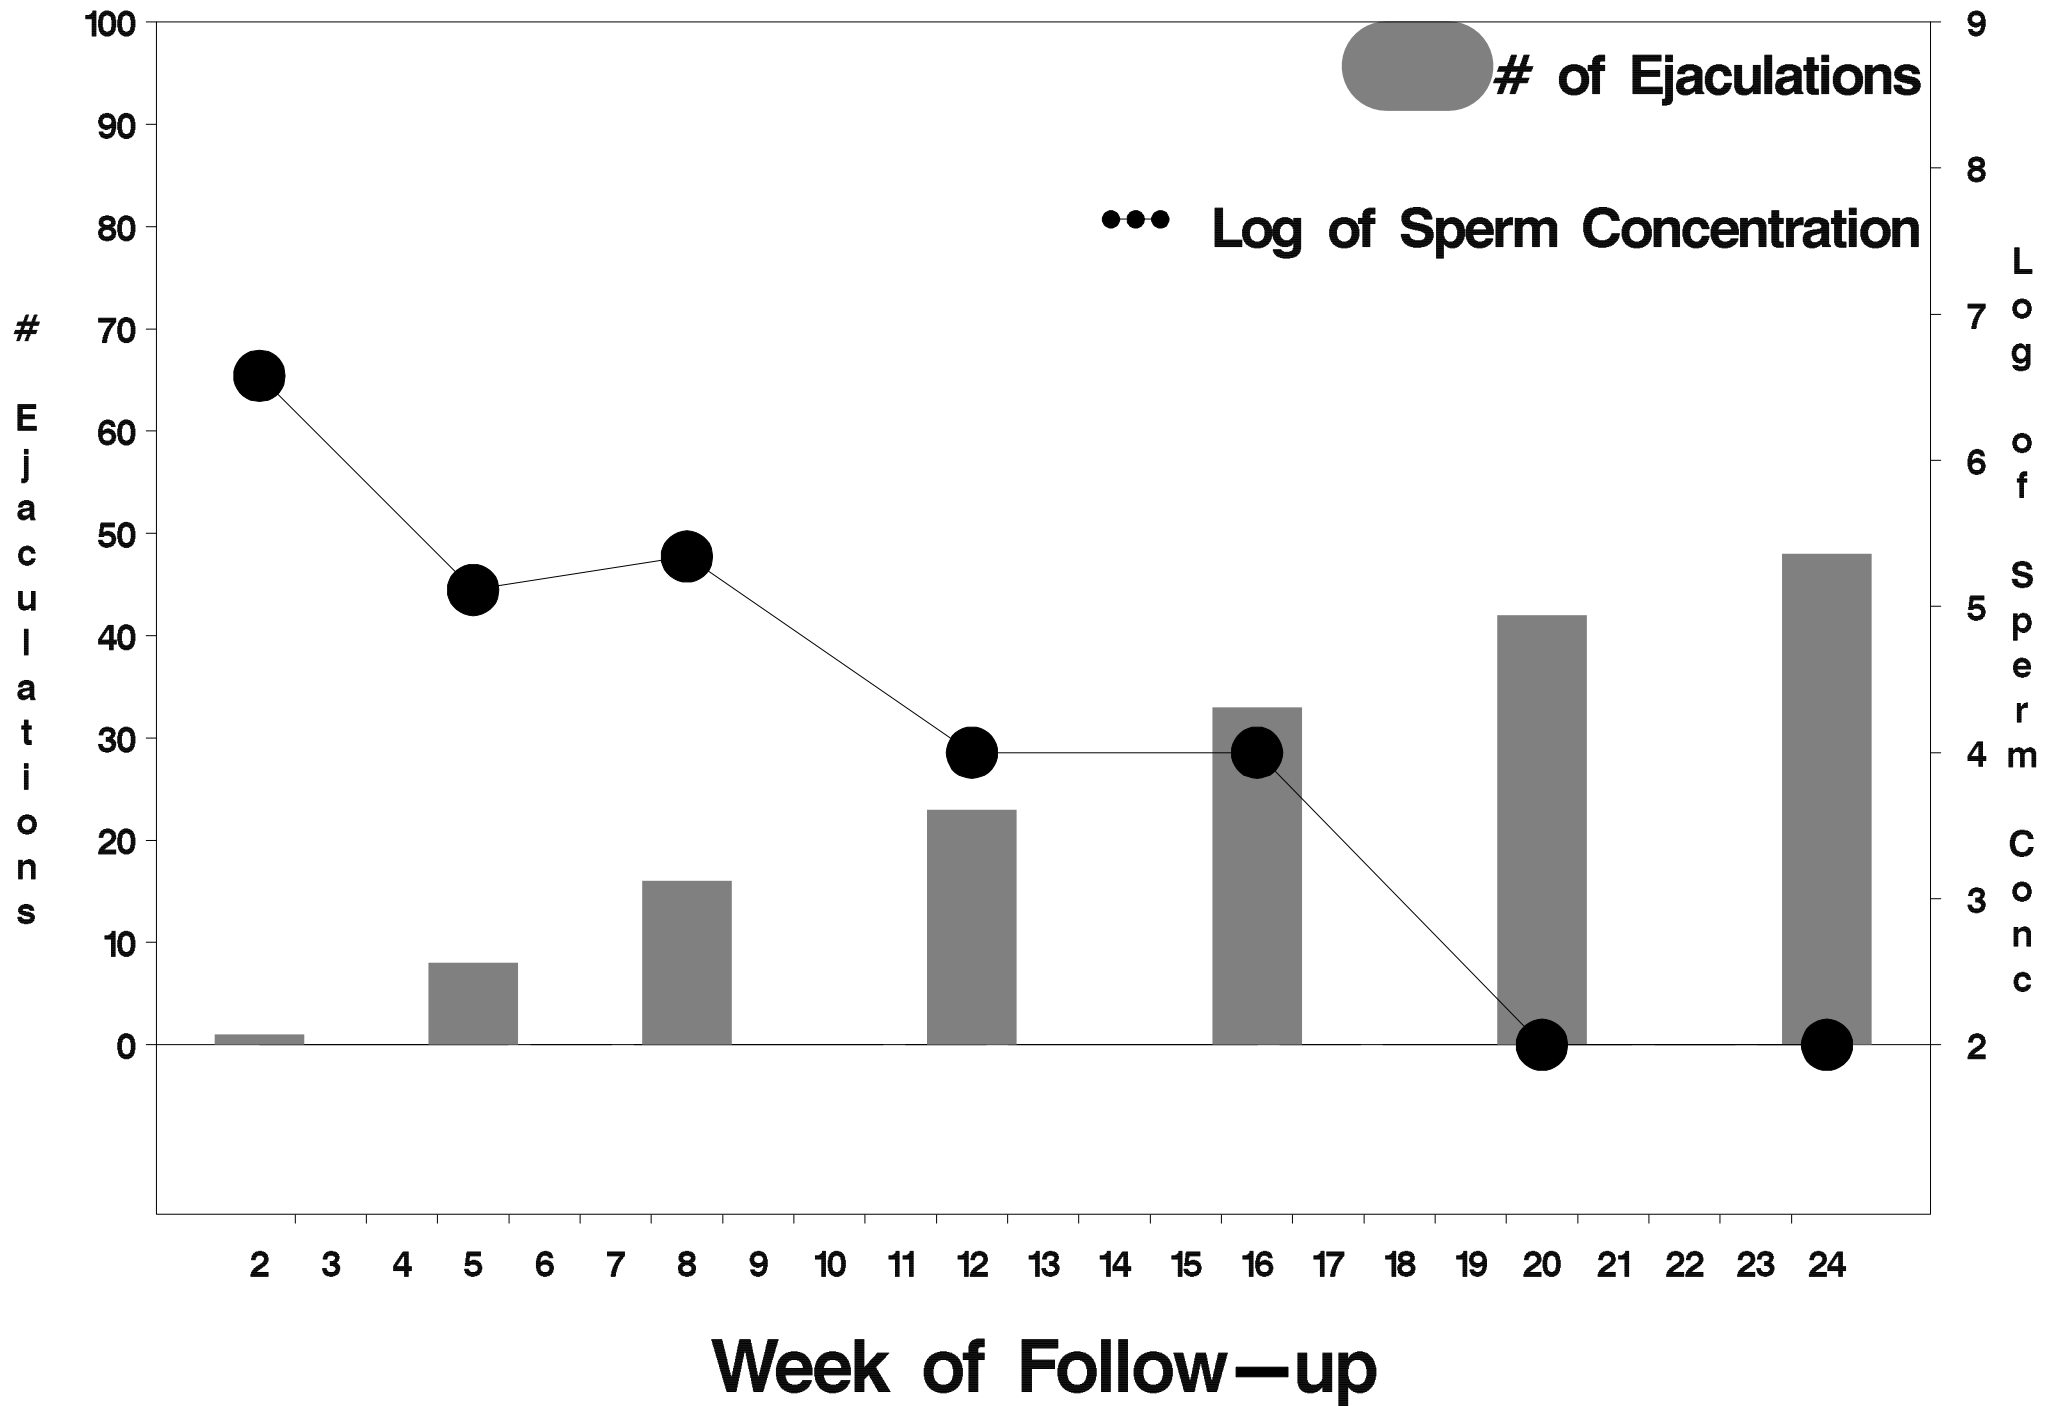

# Participant number= 126

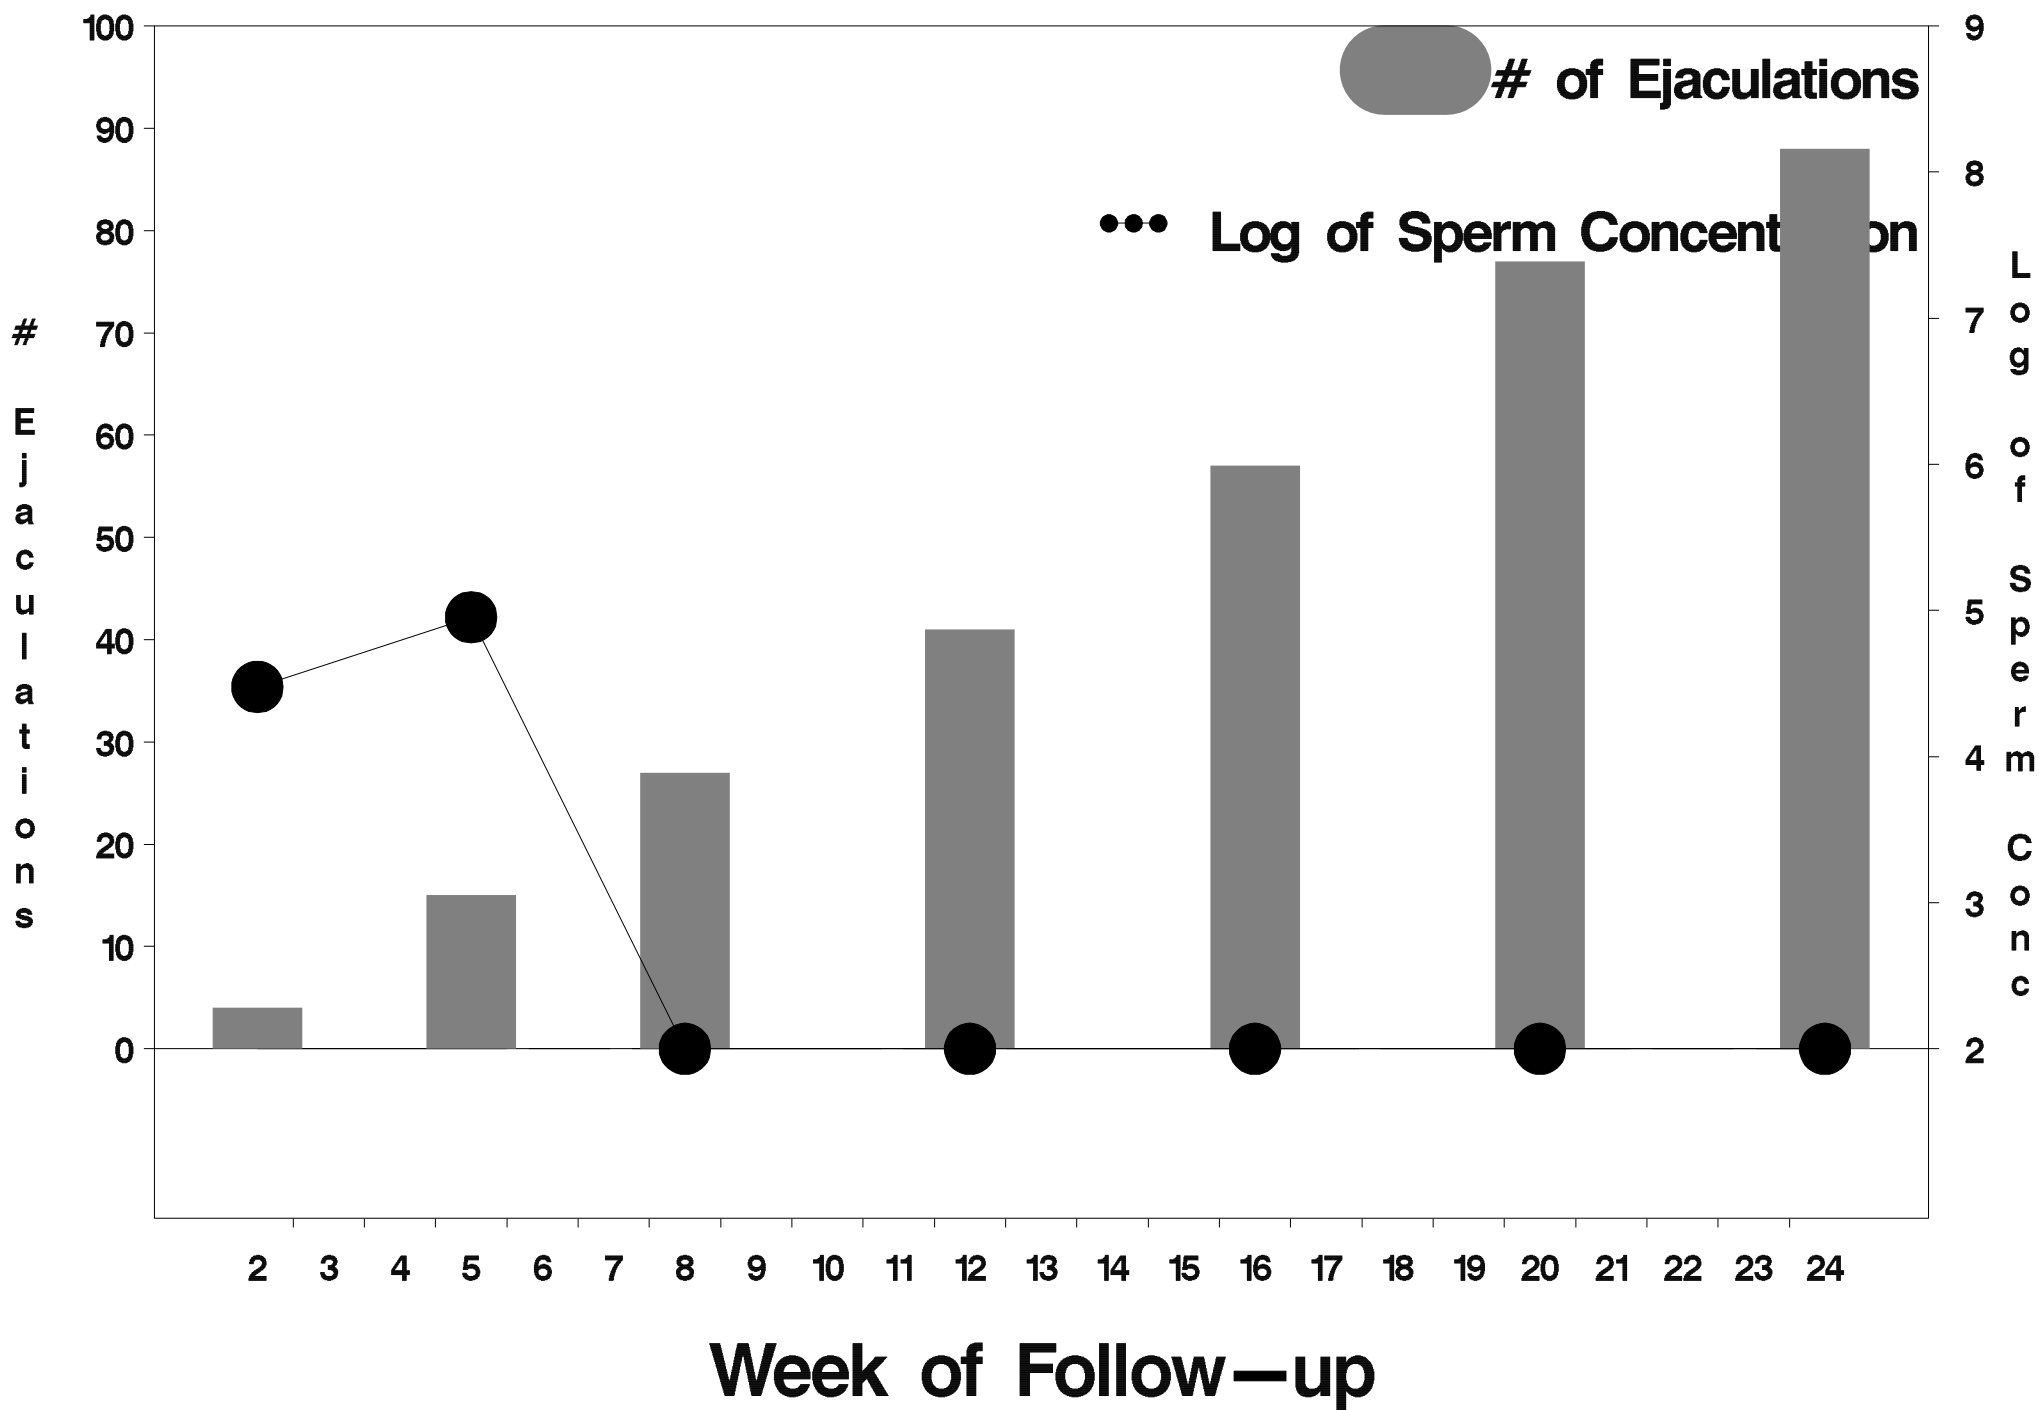

# Participant number= 127

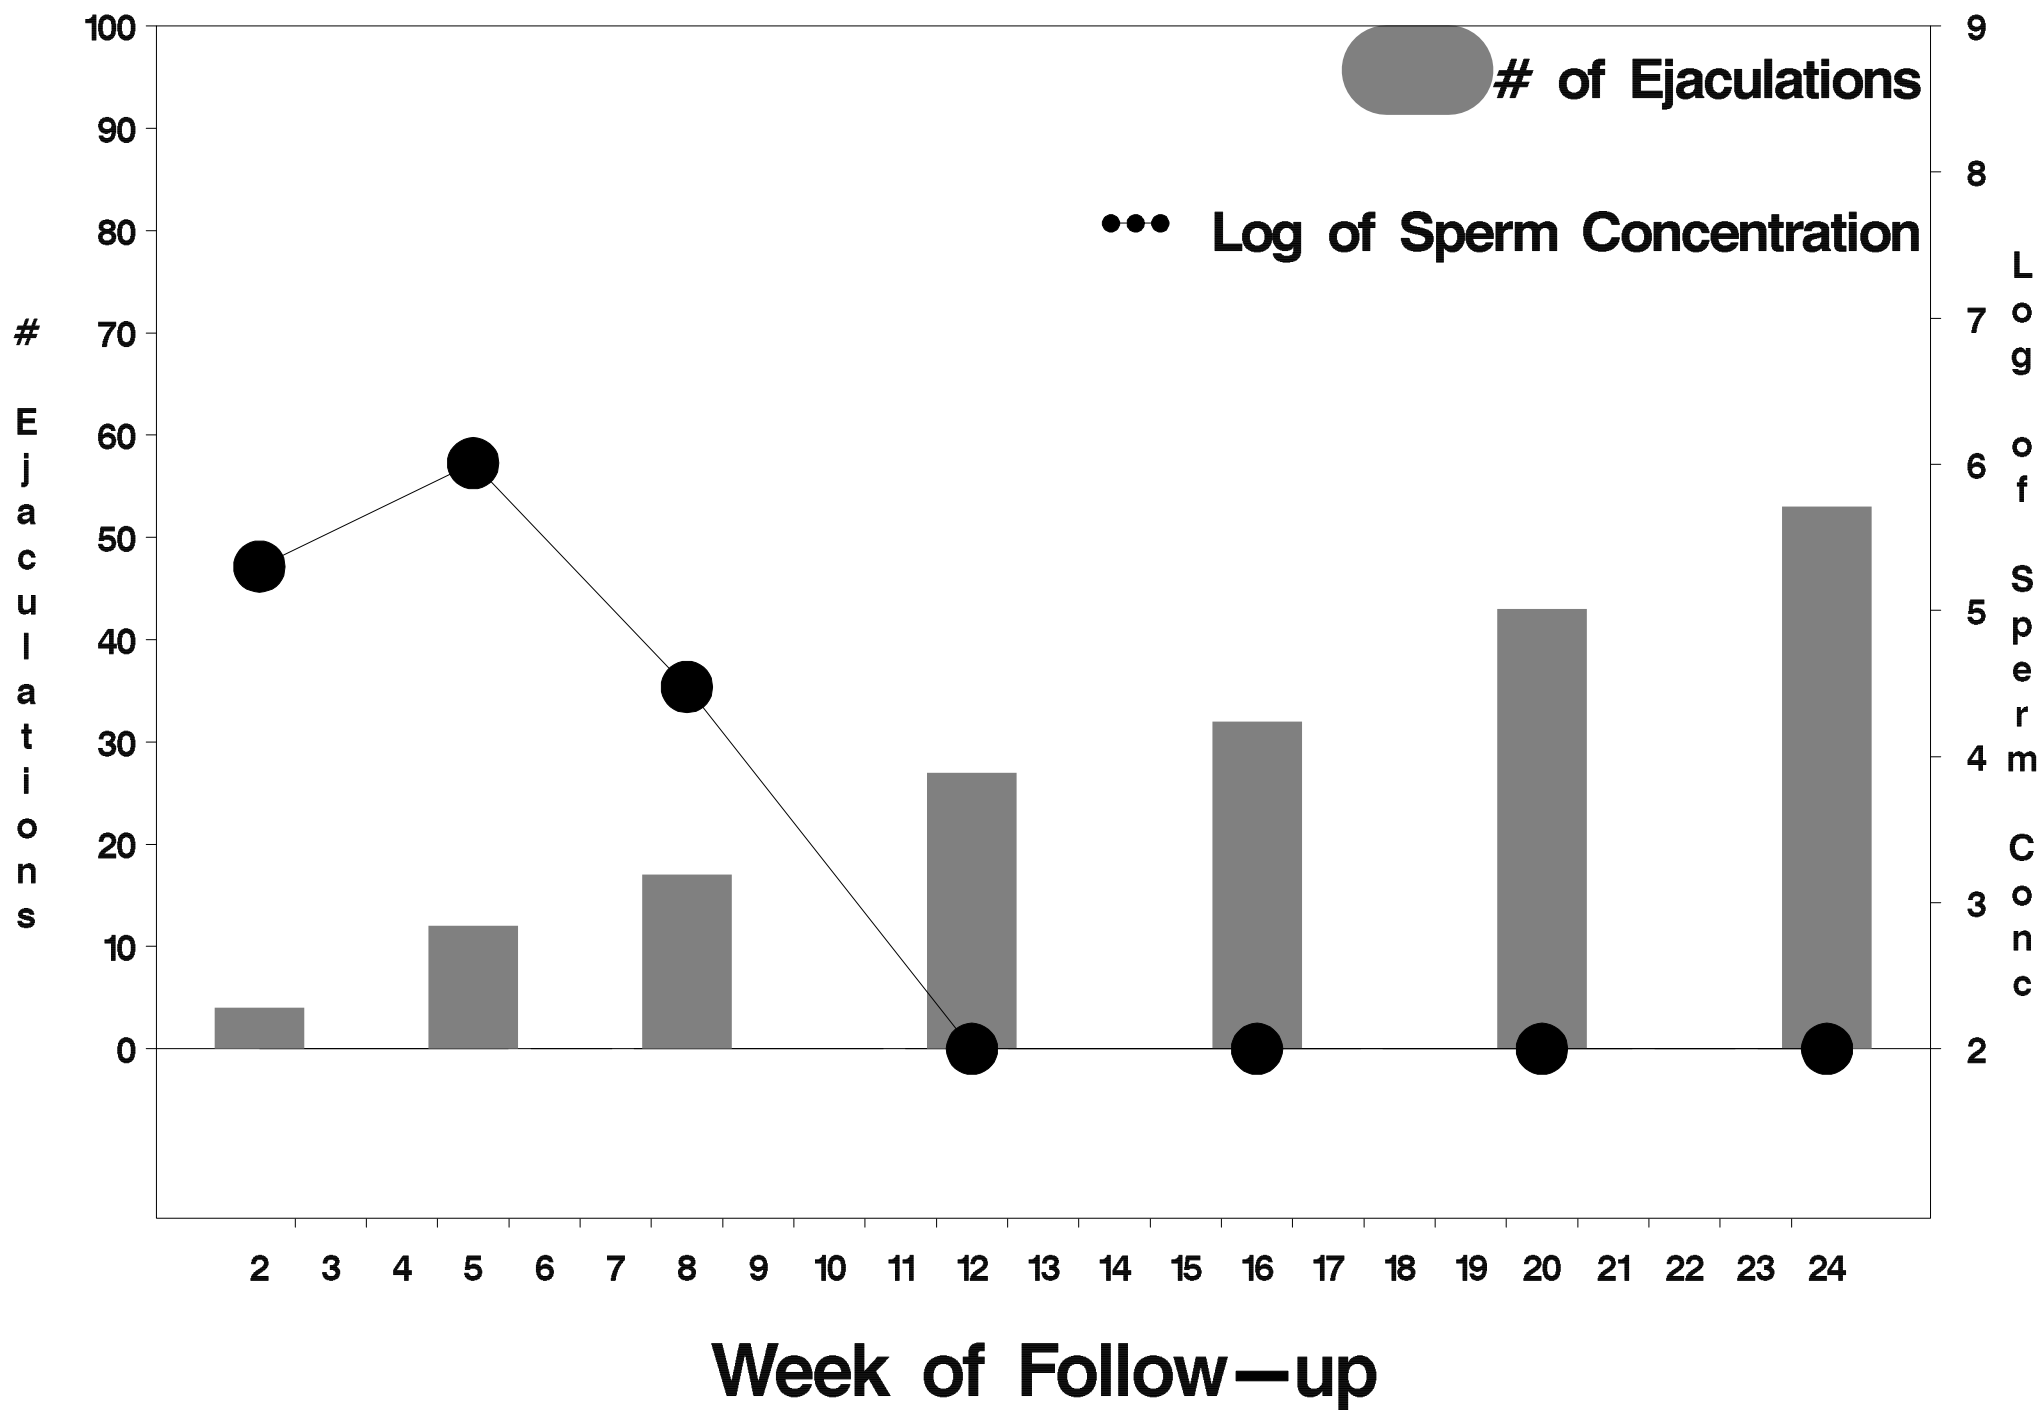

# Participant number= 128

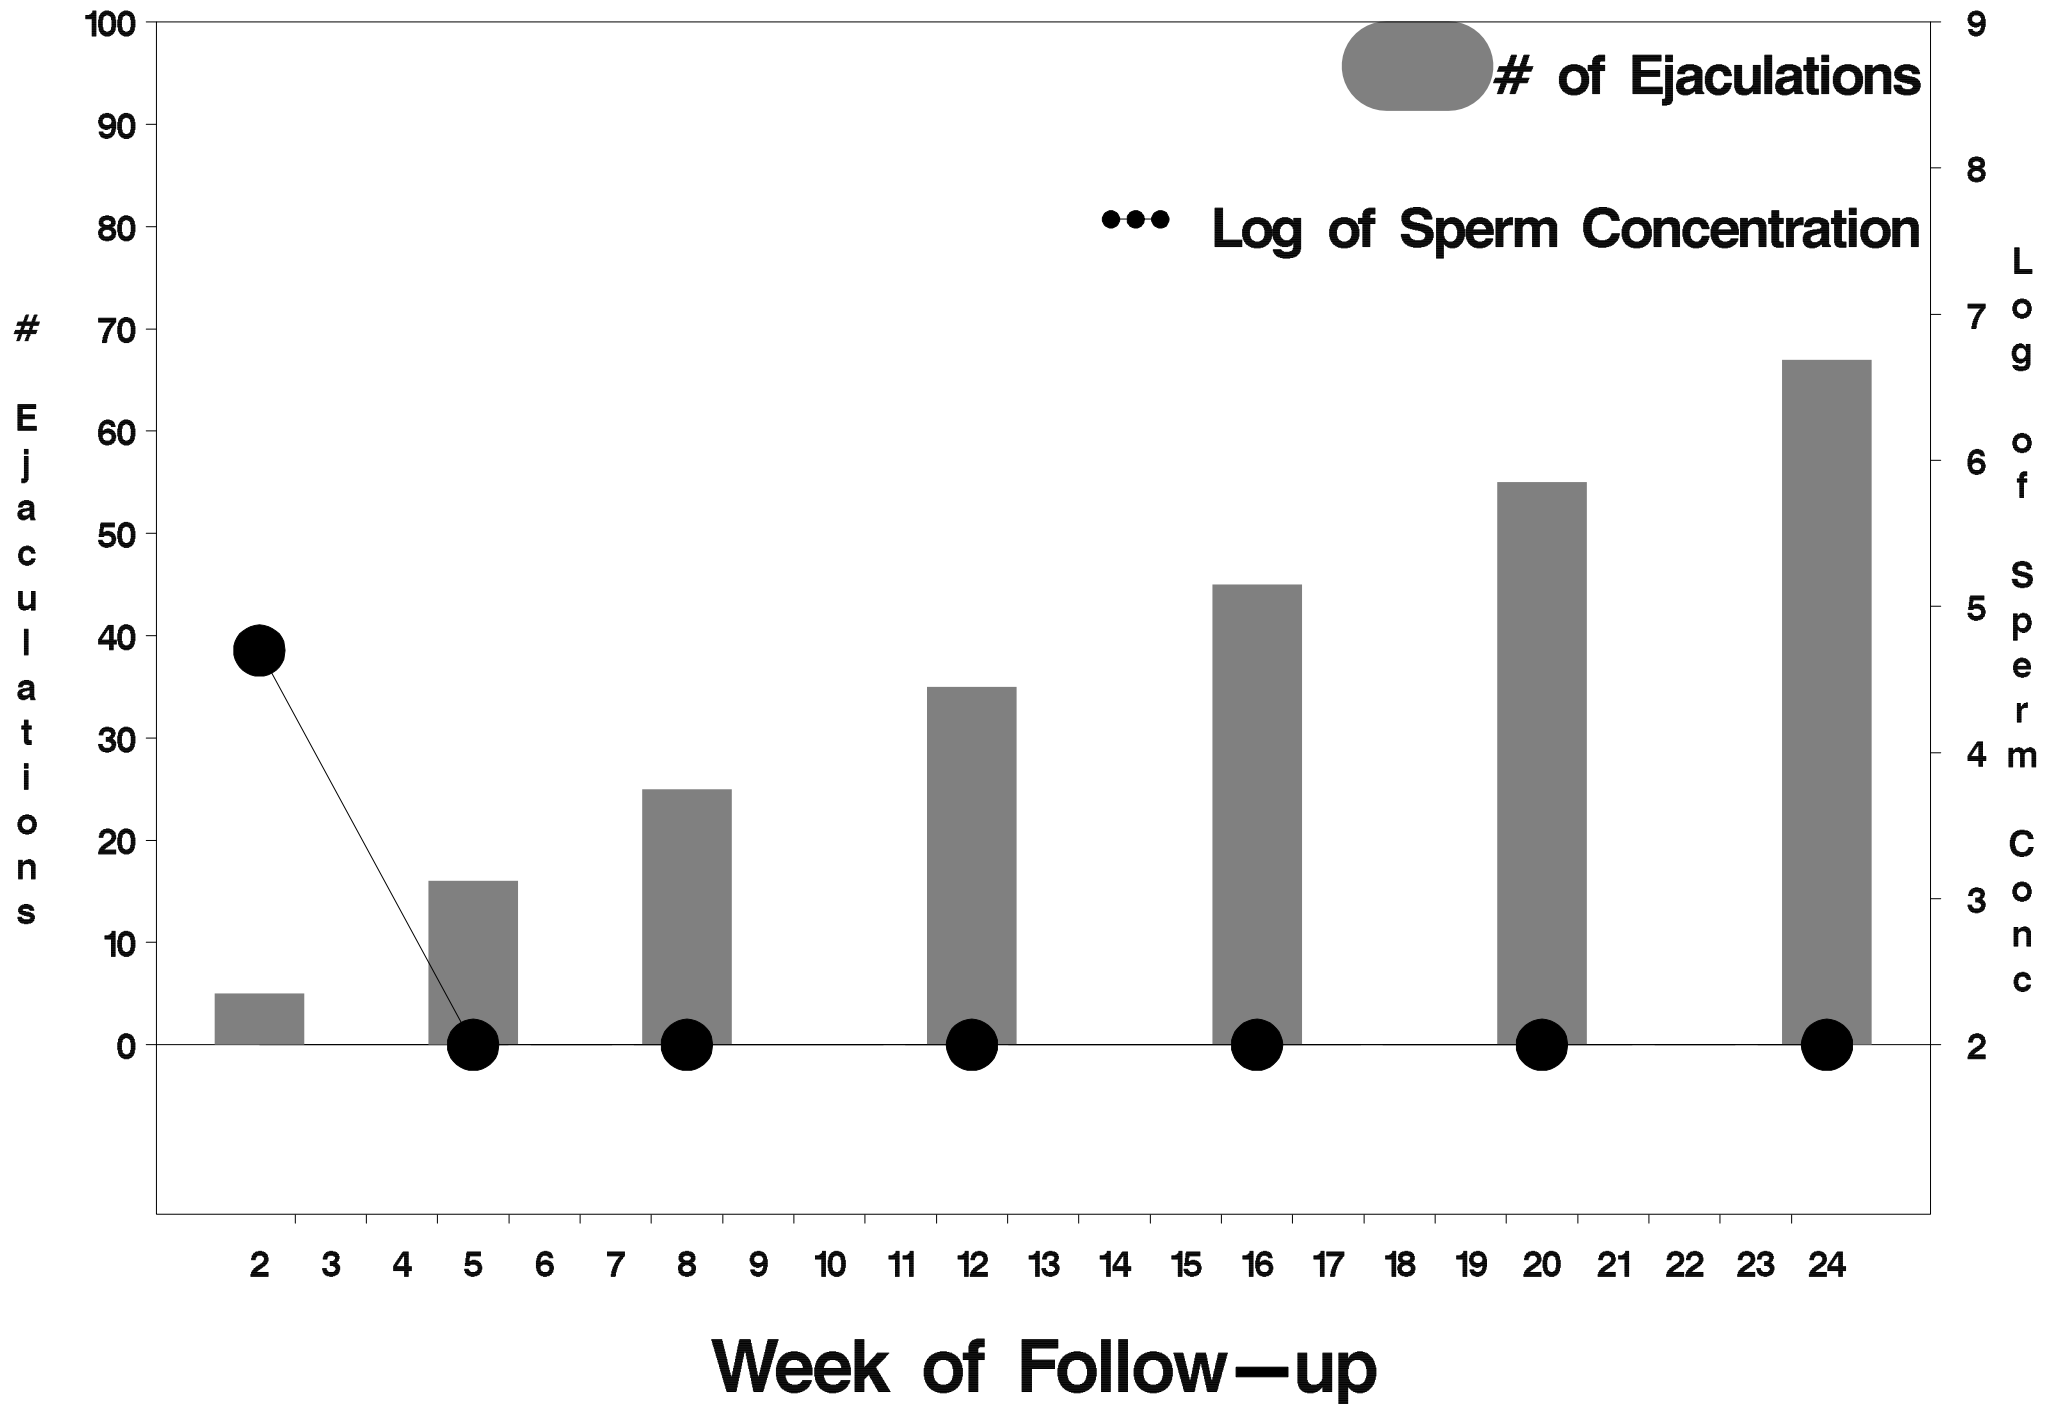

# Participant number= 129

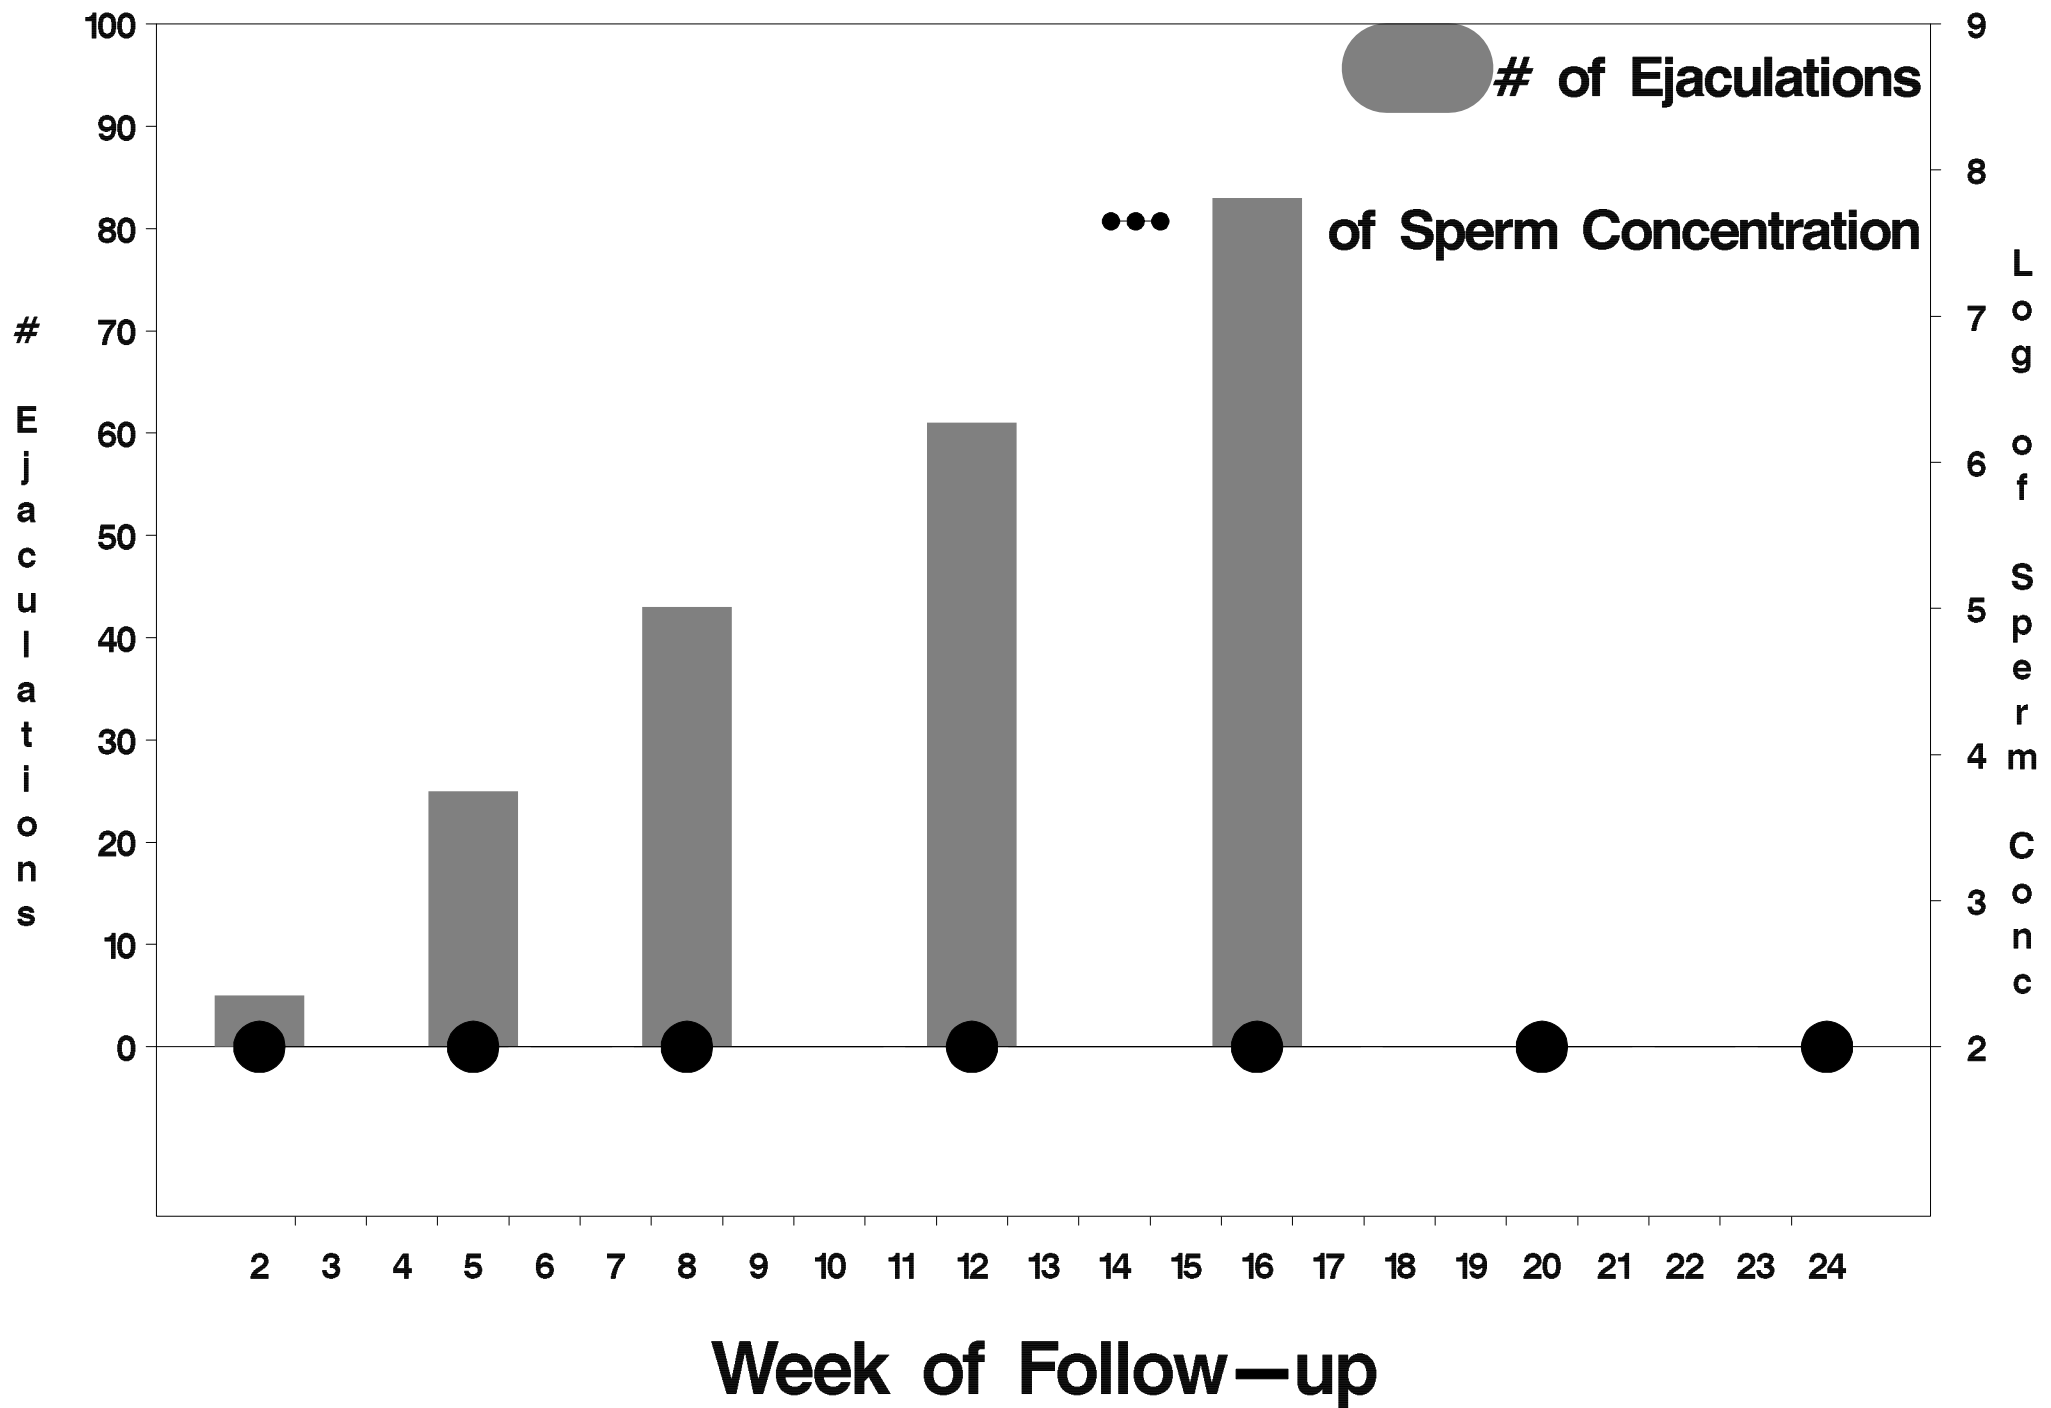

# Participant number= 130

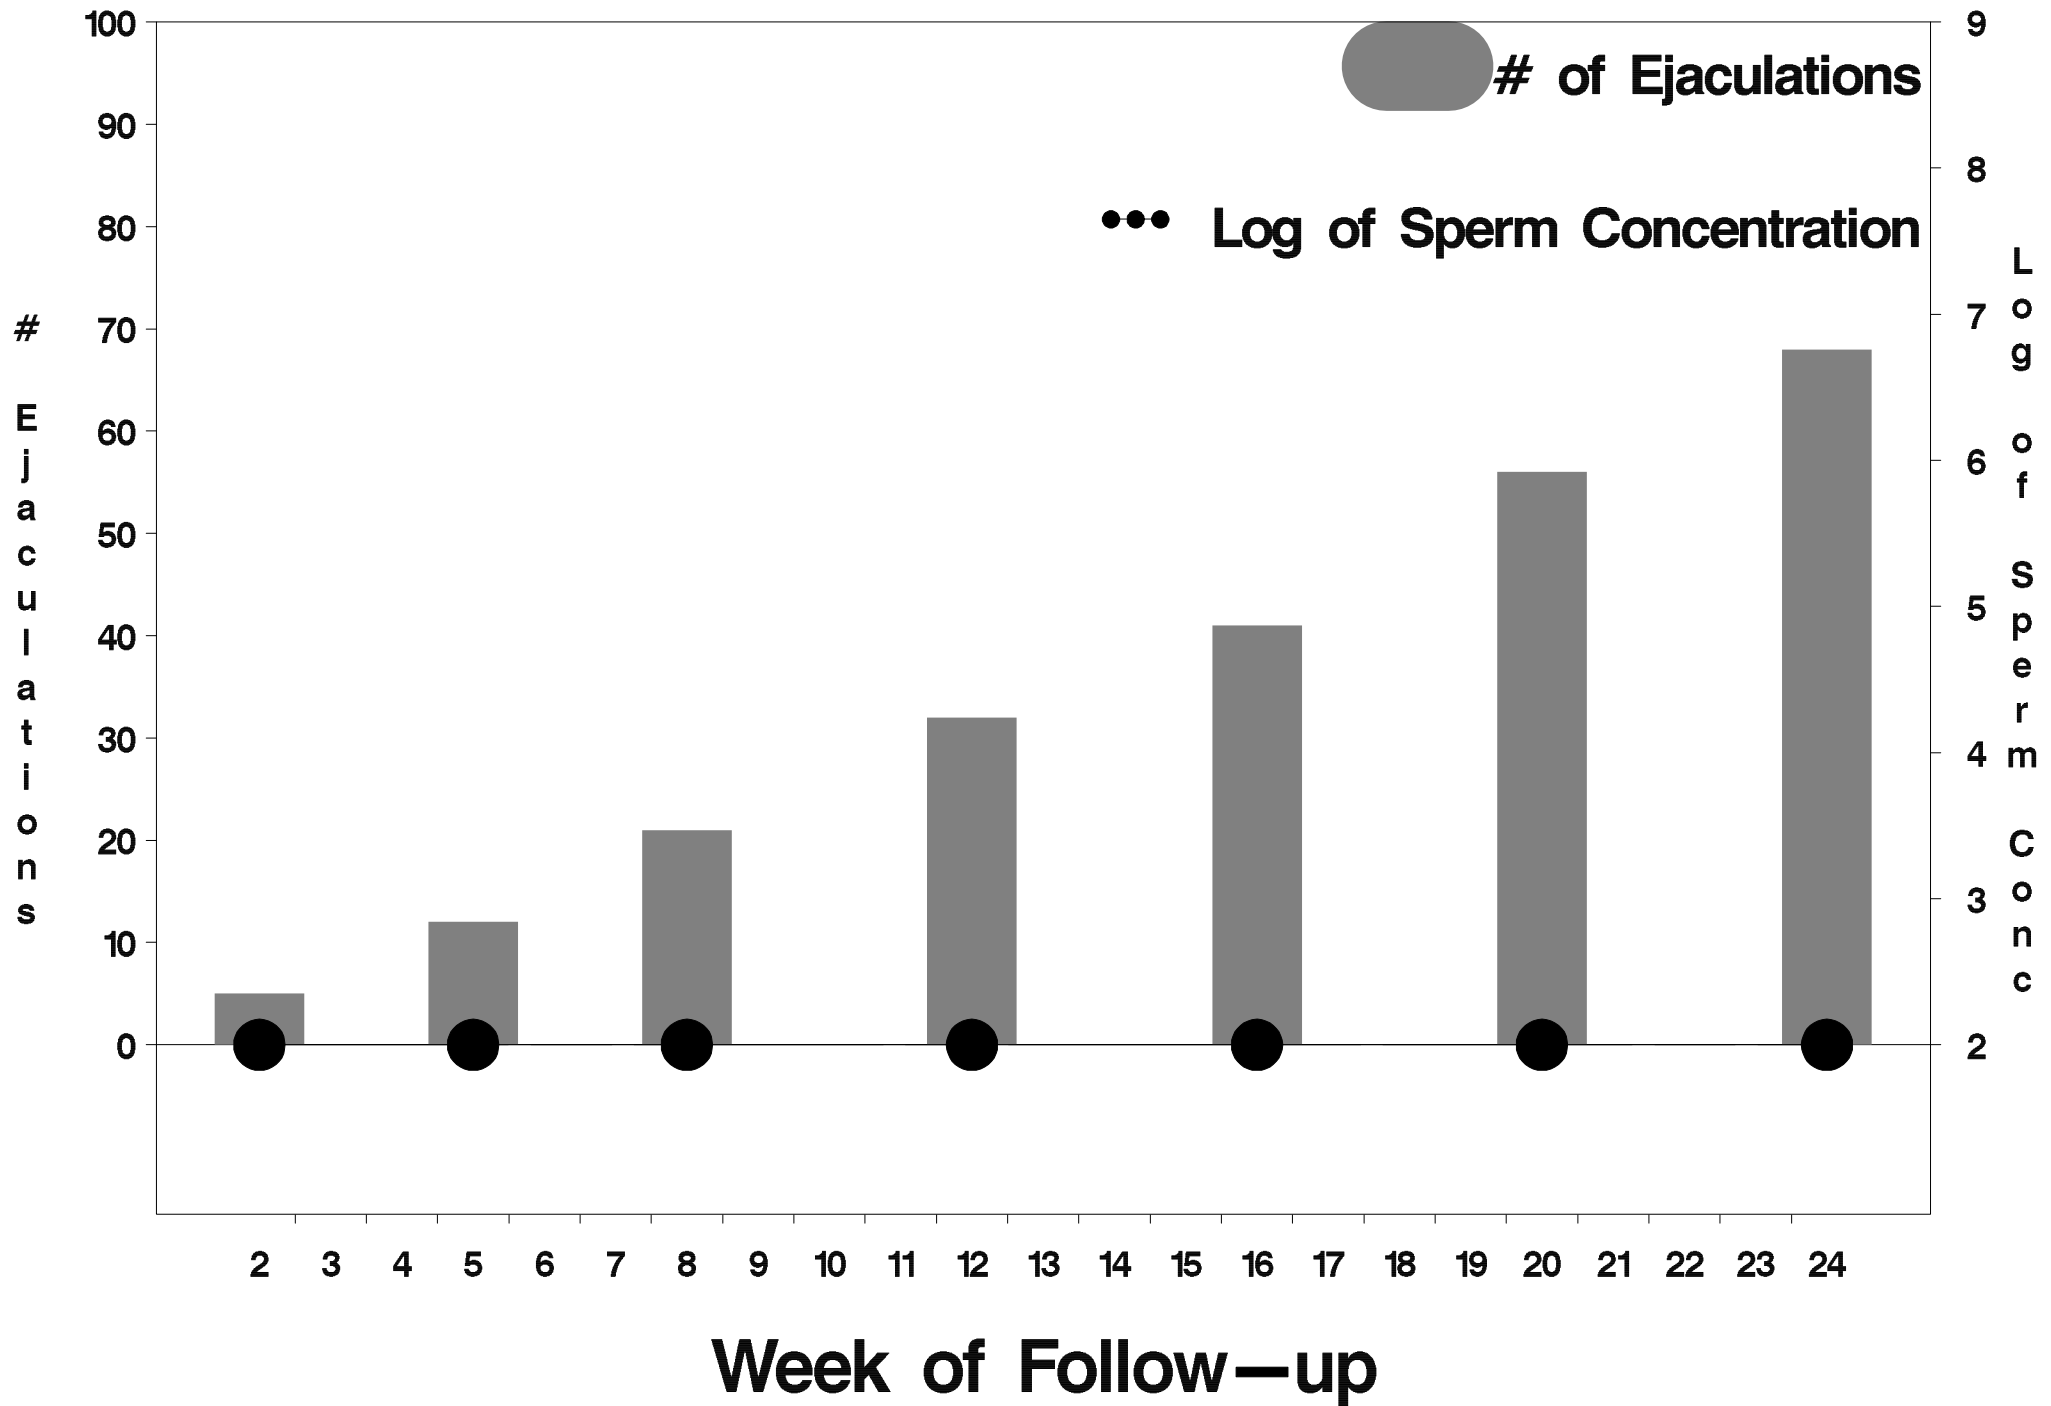

# Participant number= 131

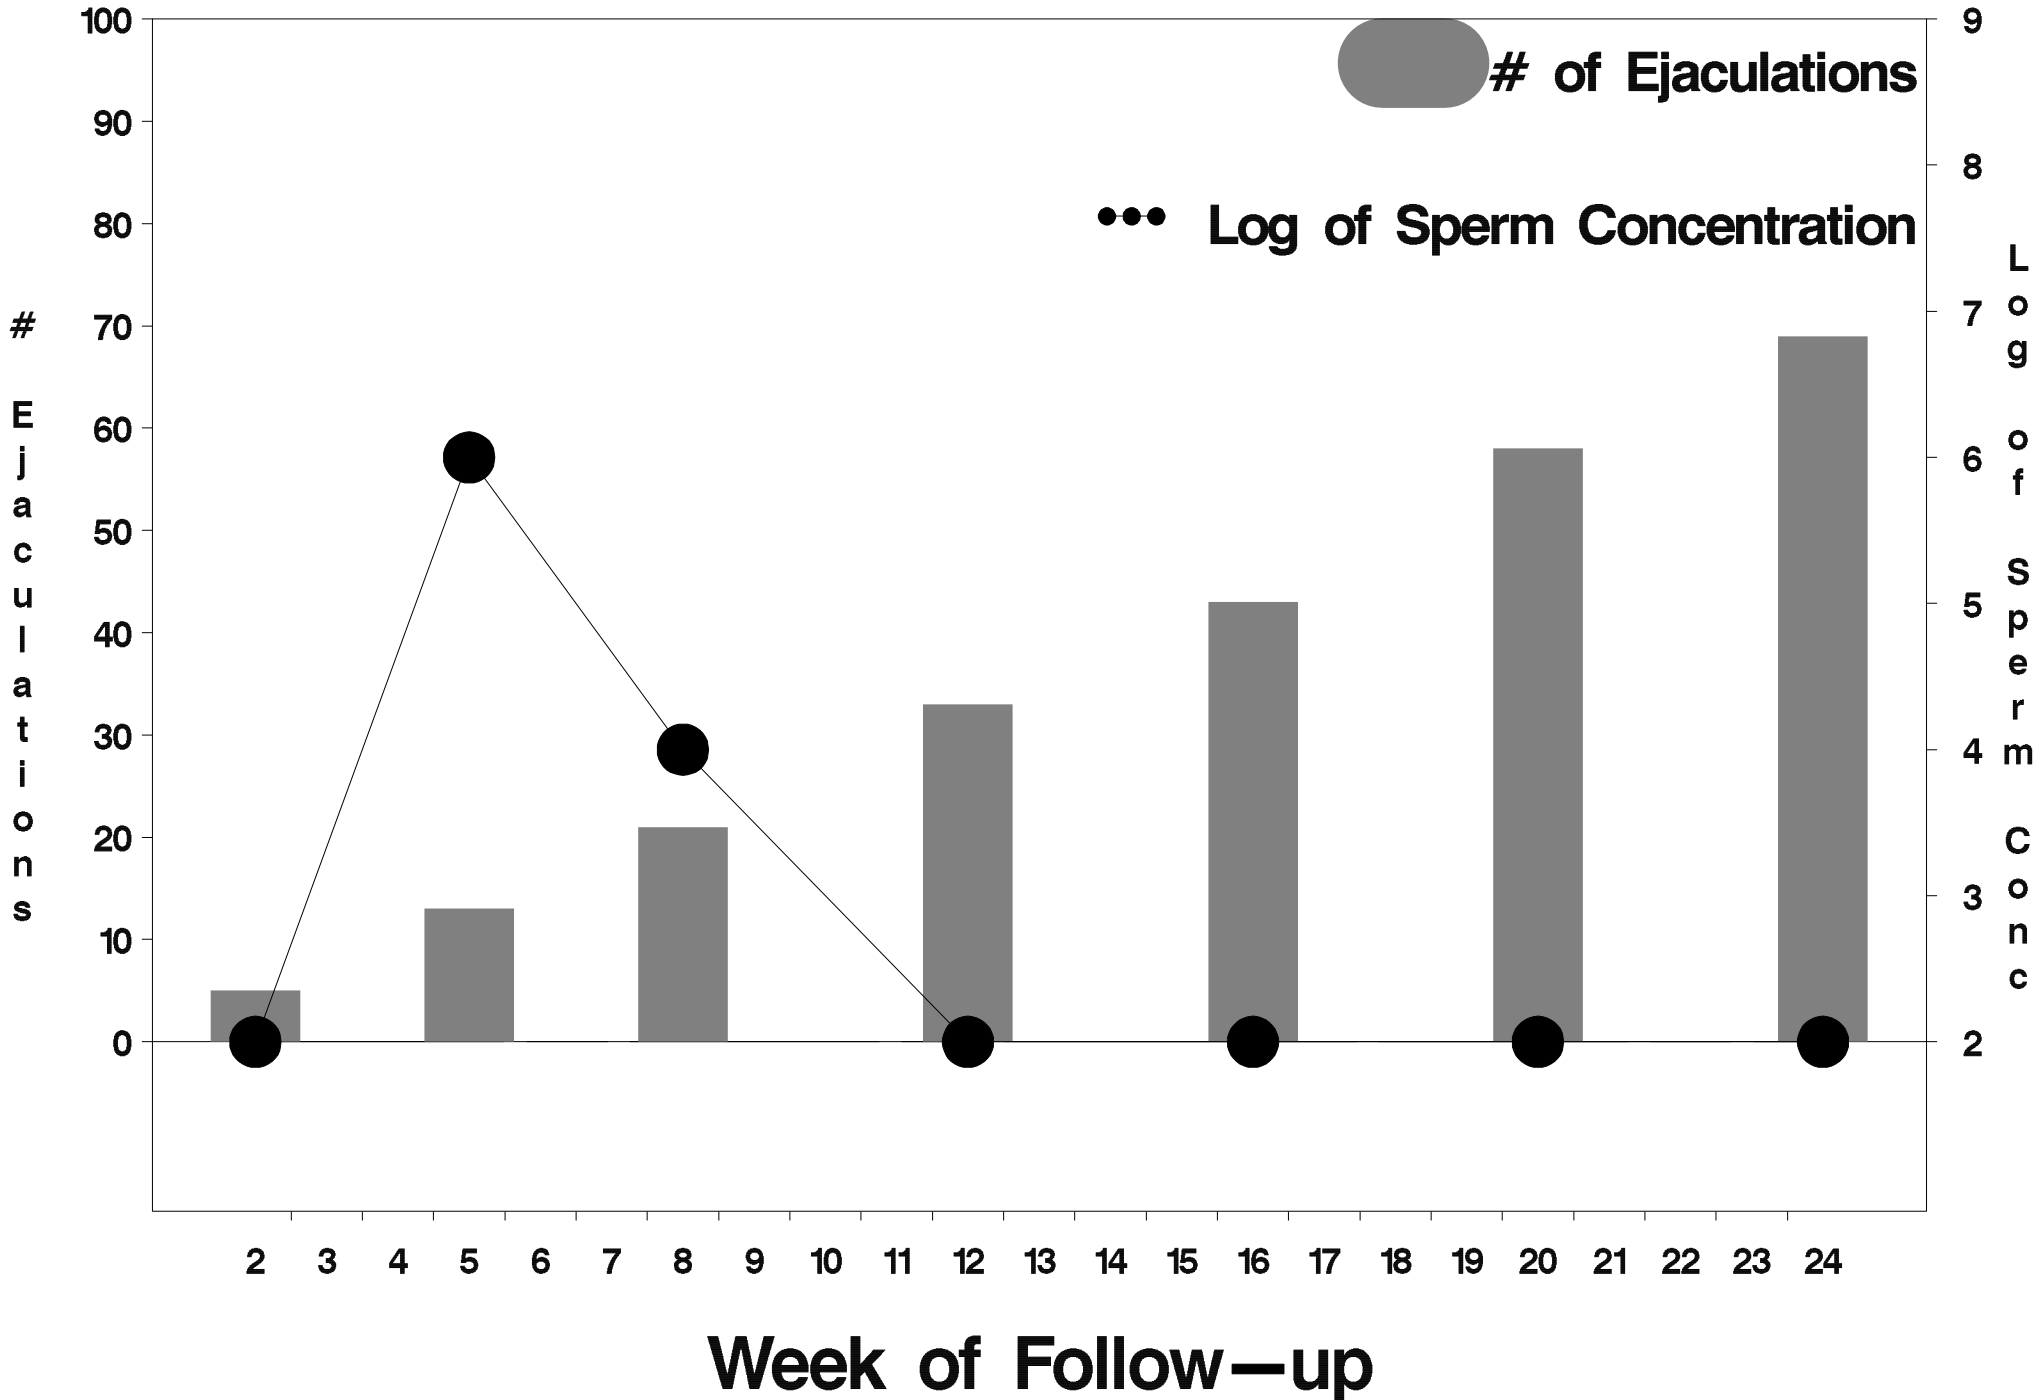

# Participant number= 132

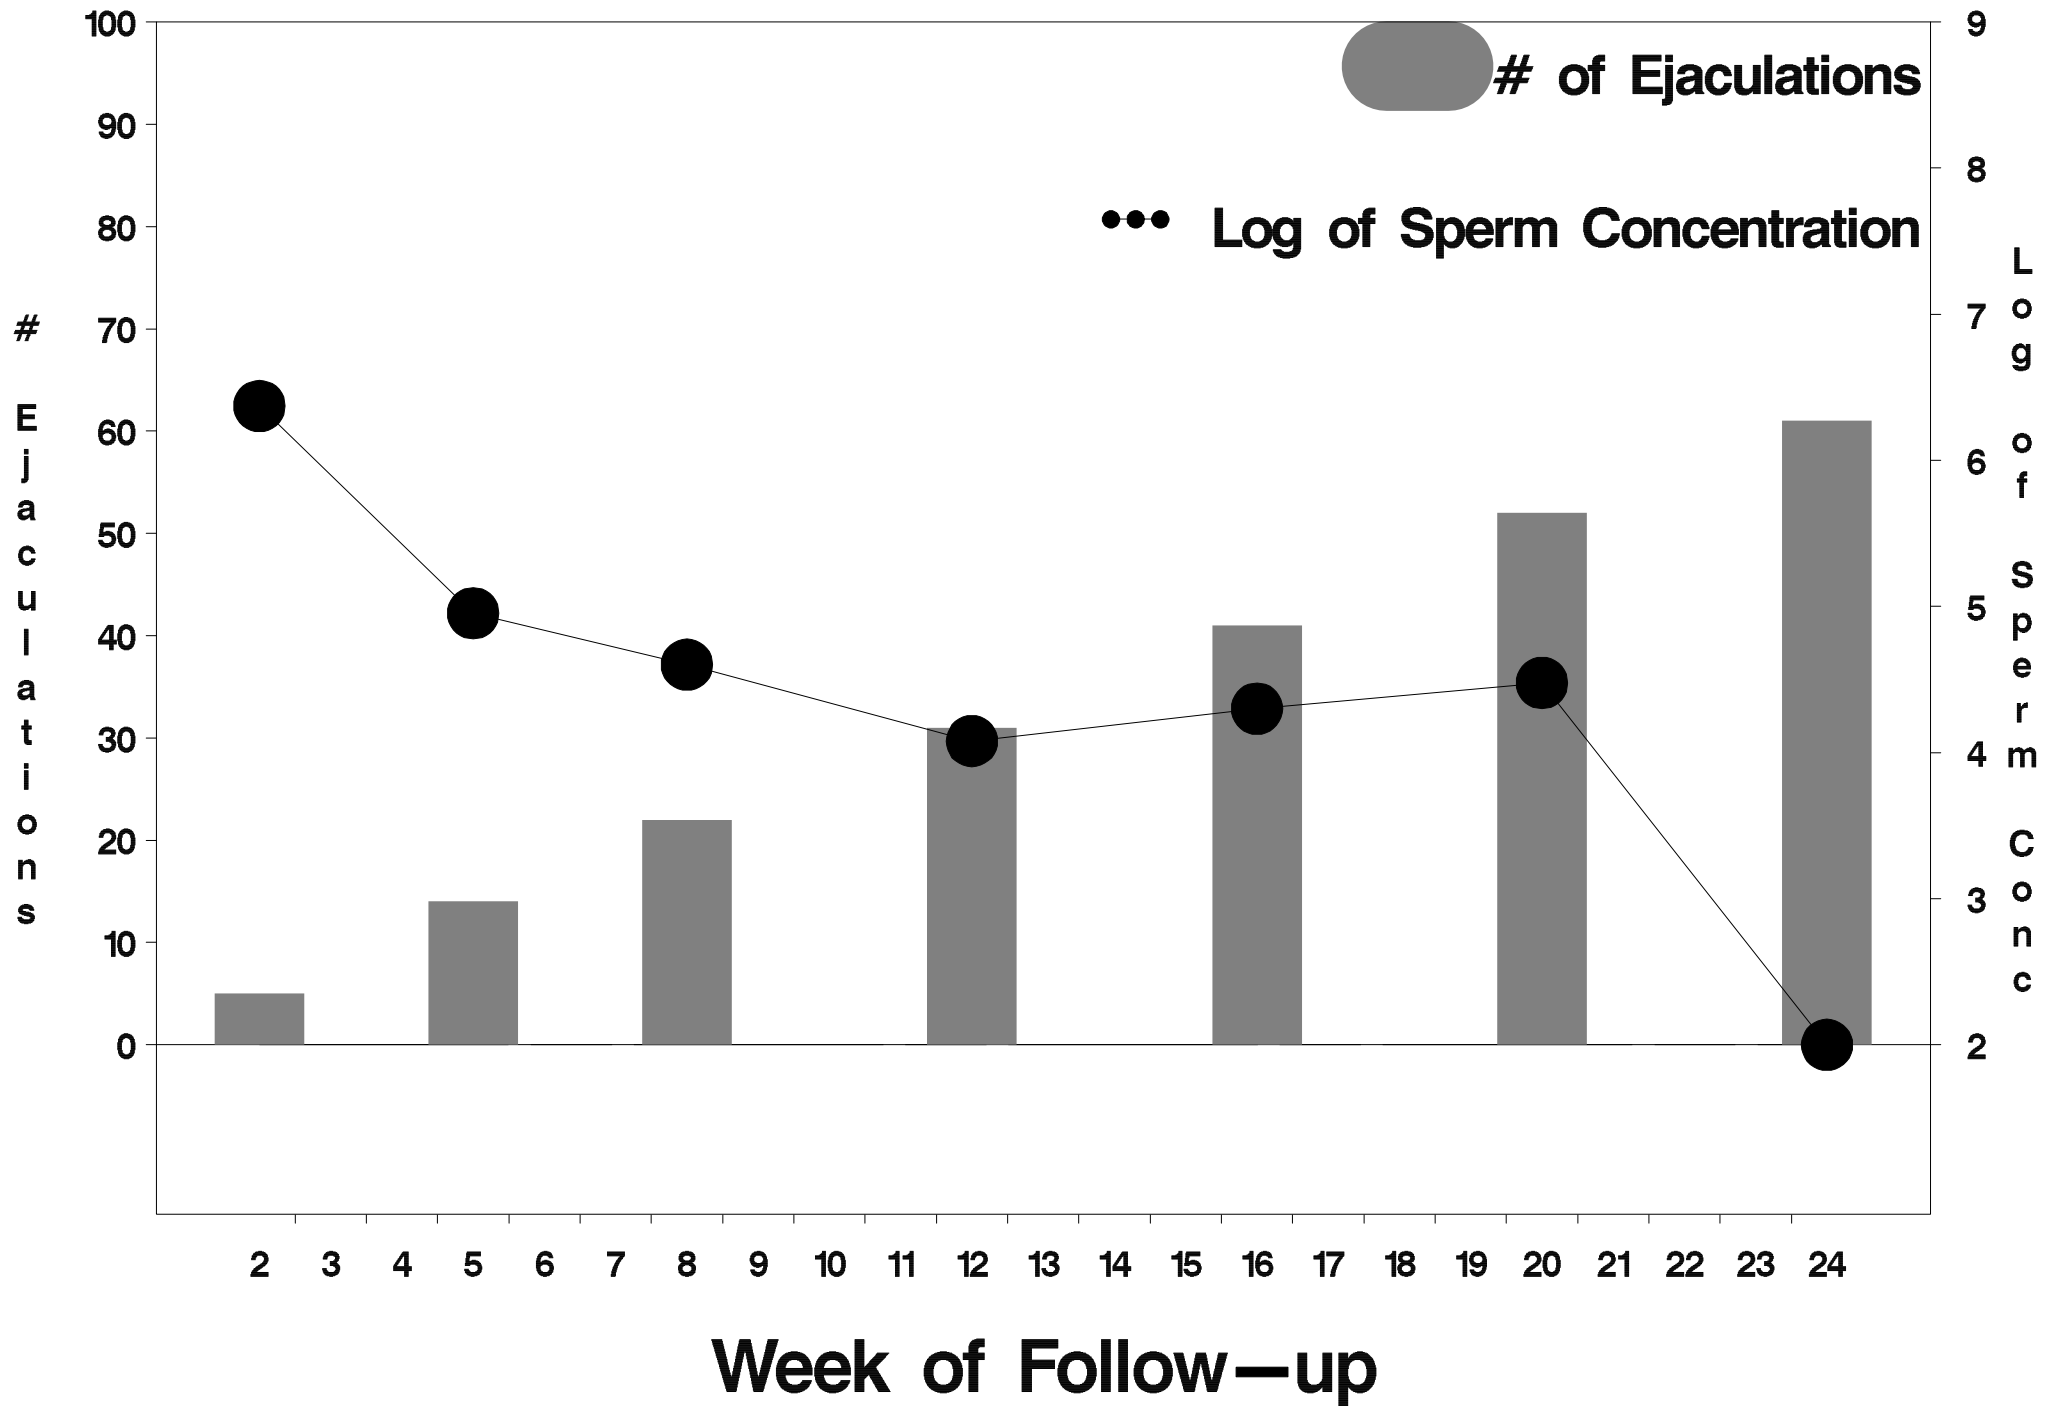



# Participant number= 133

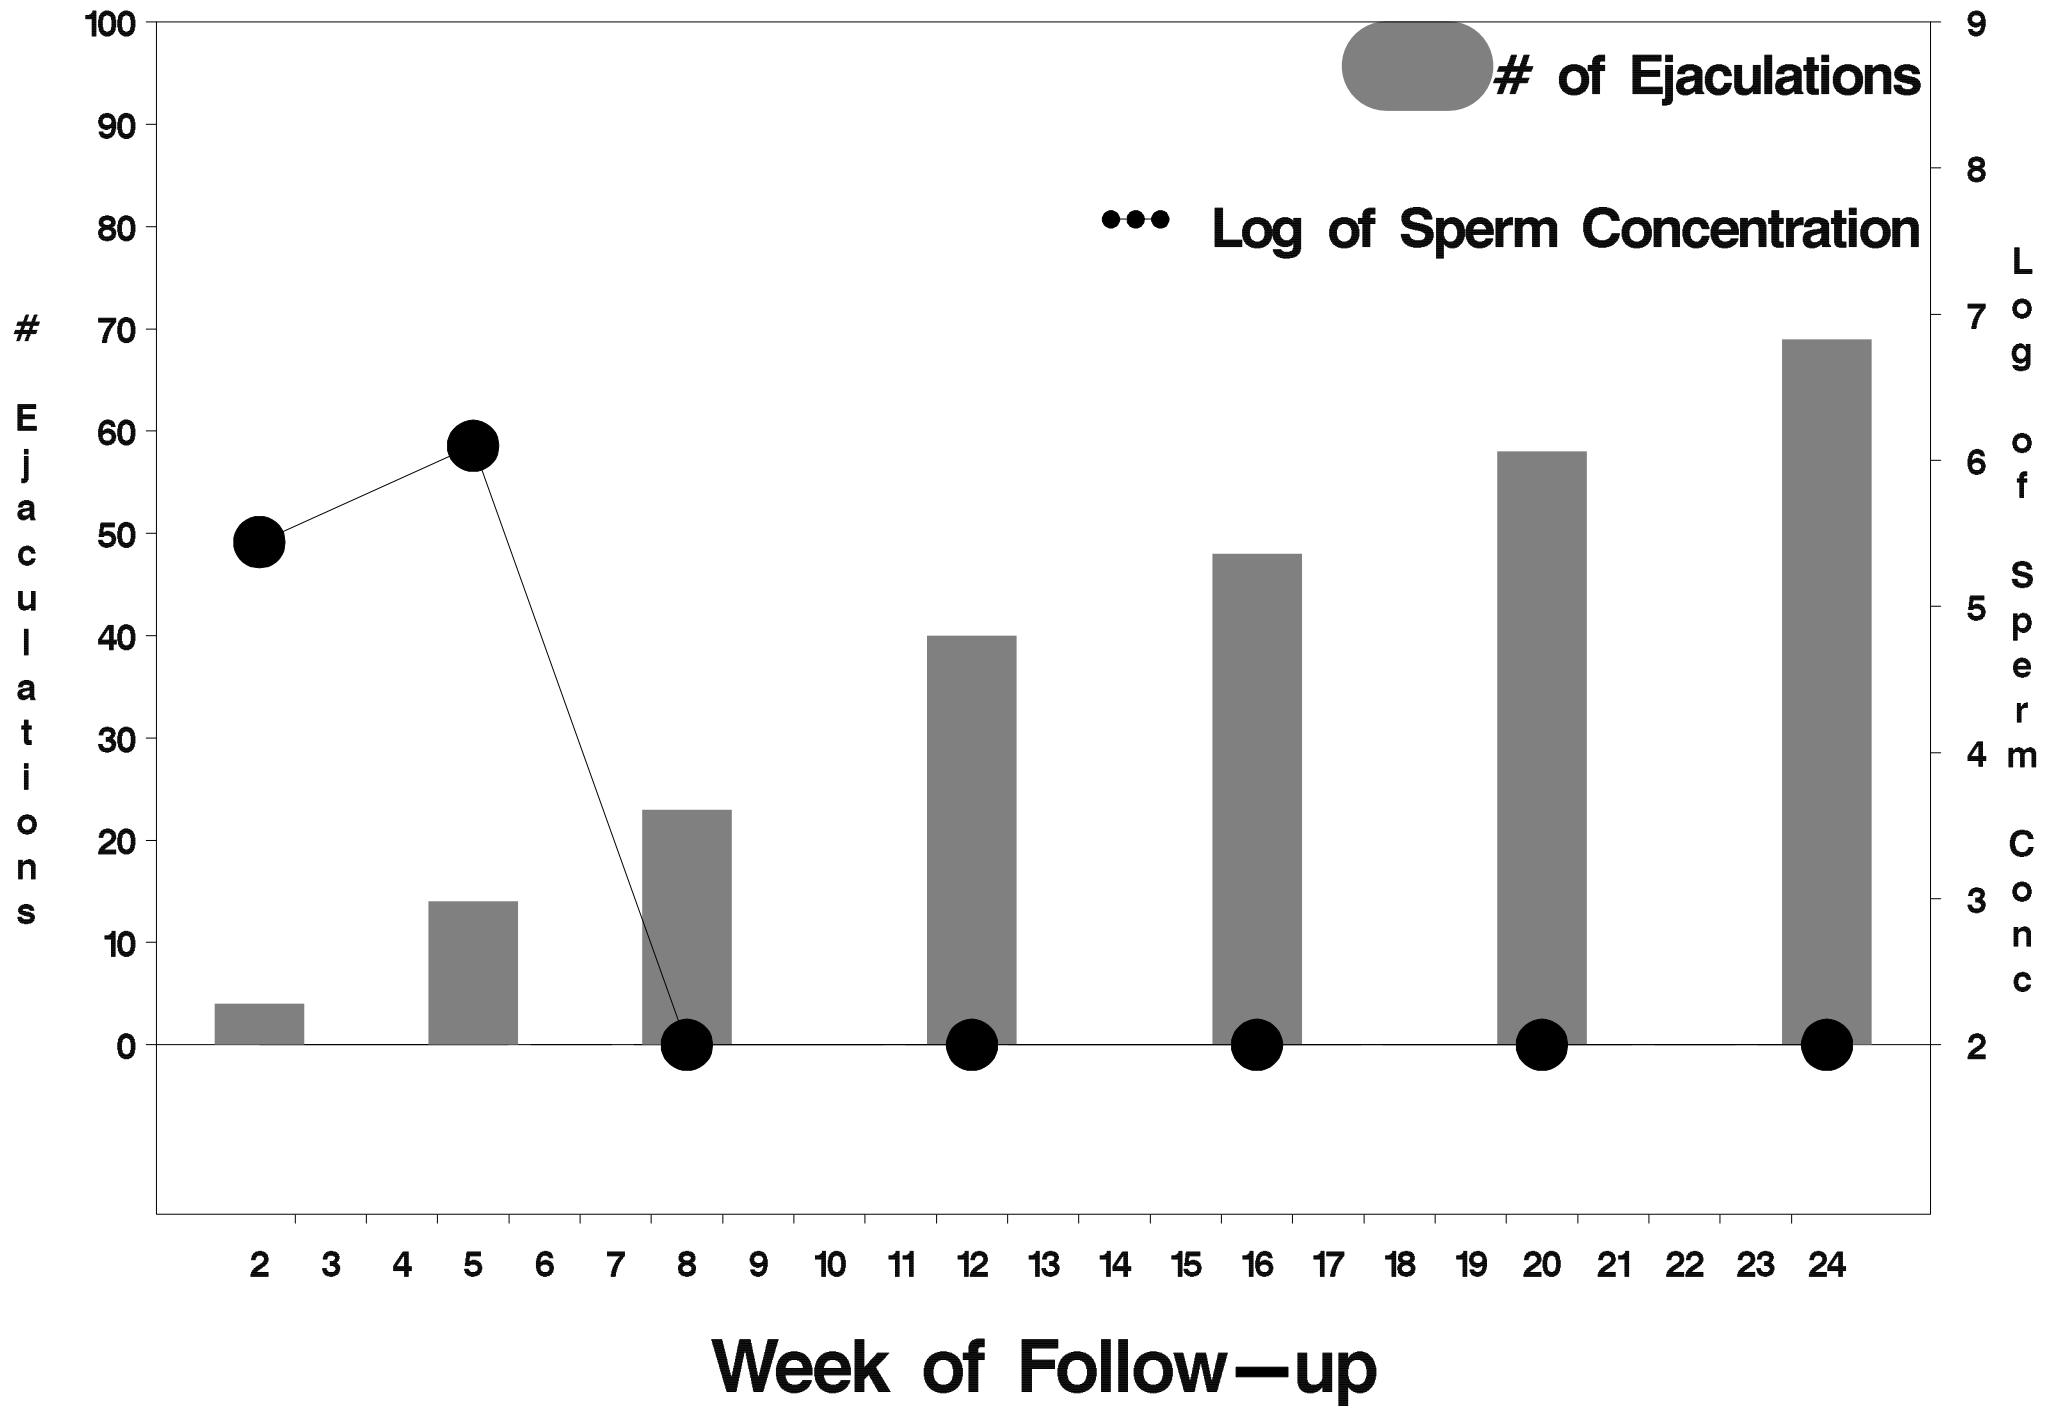

# Participant number= 134

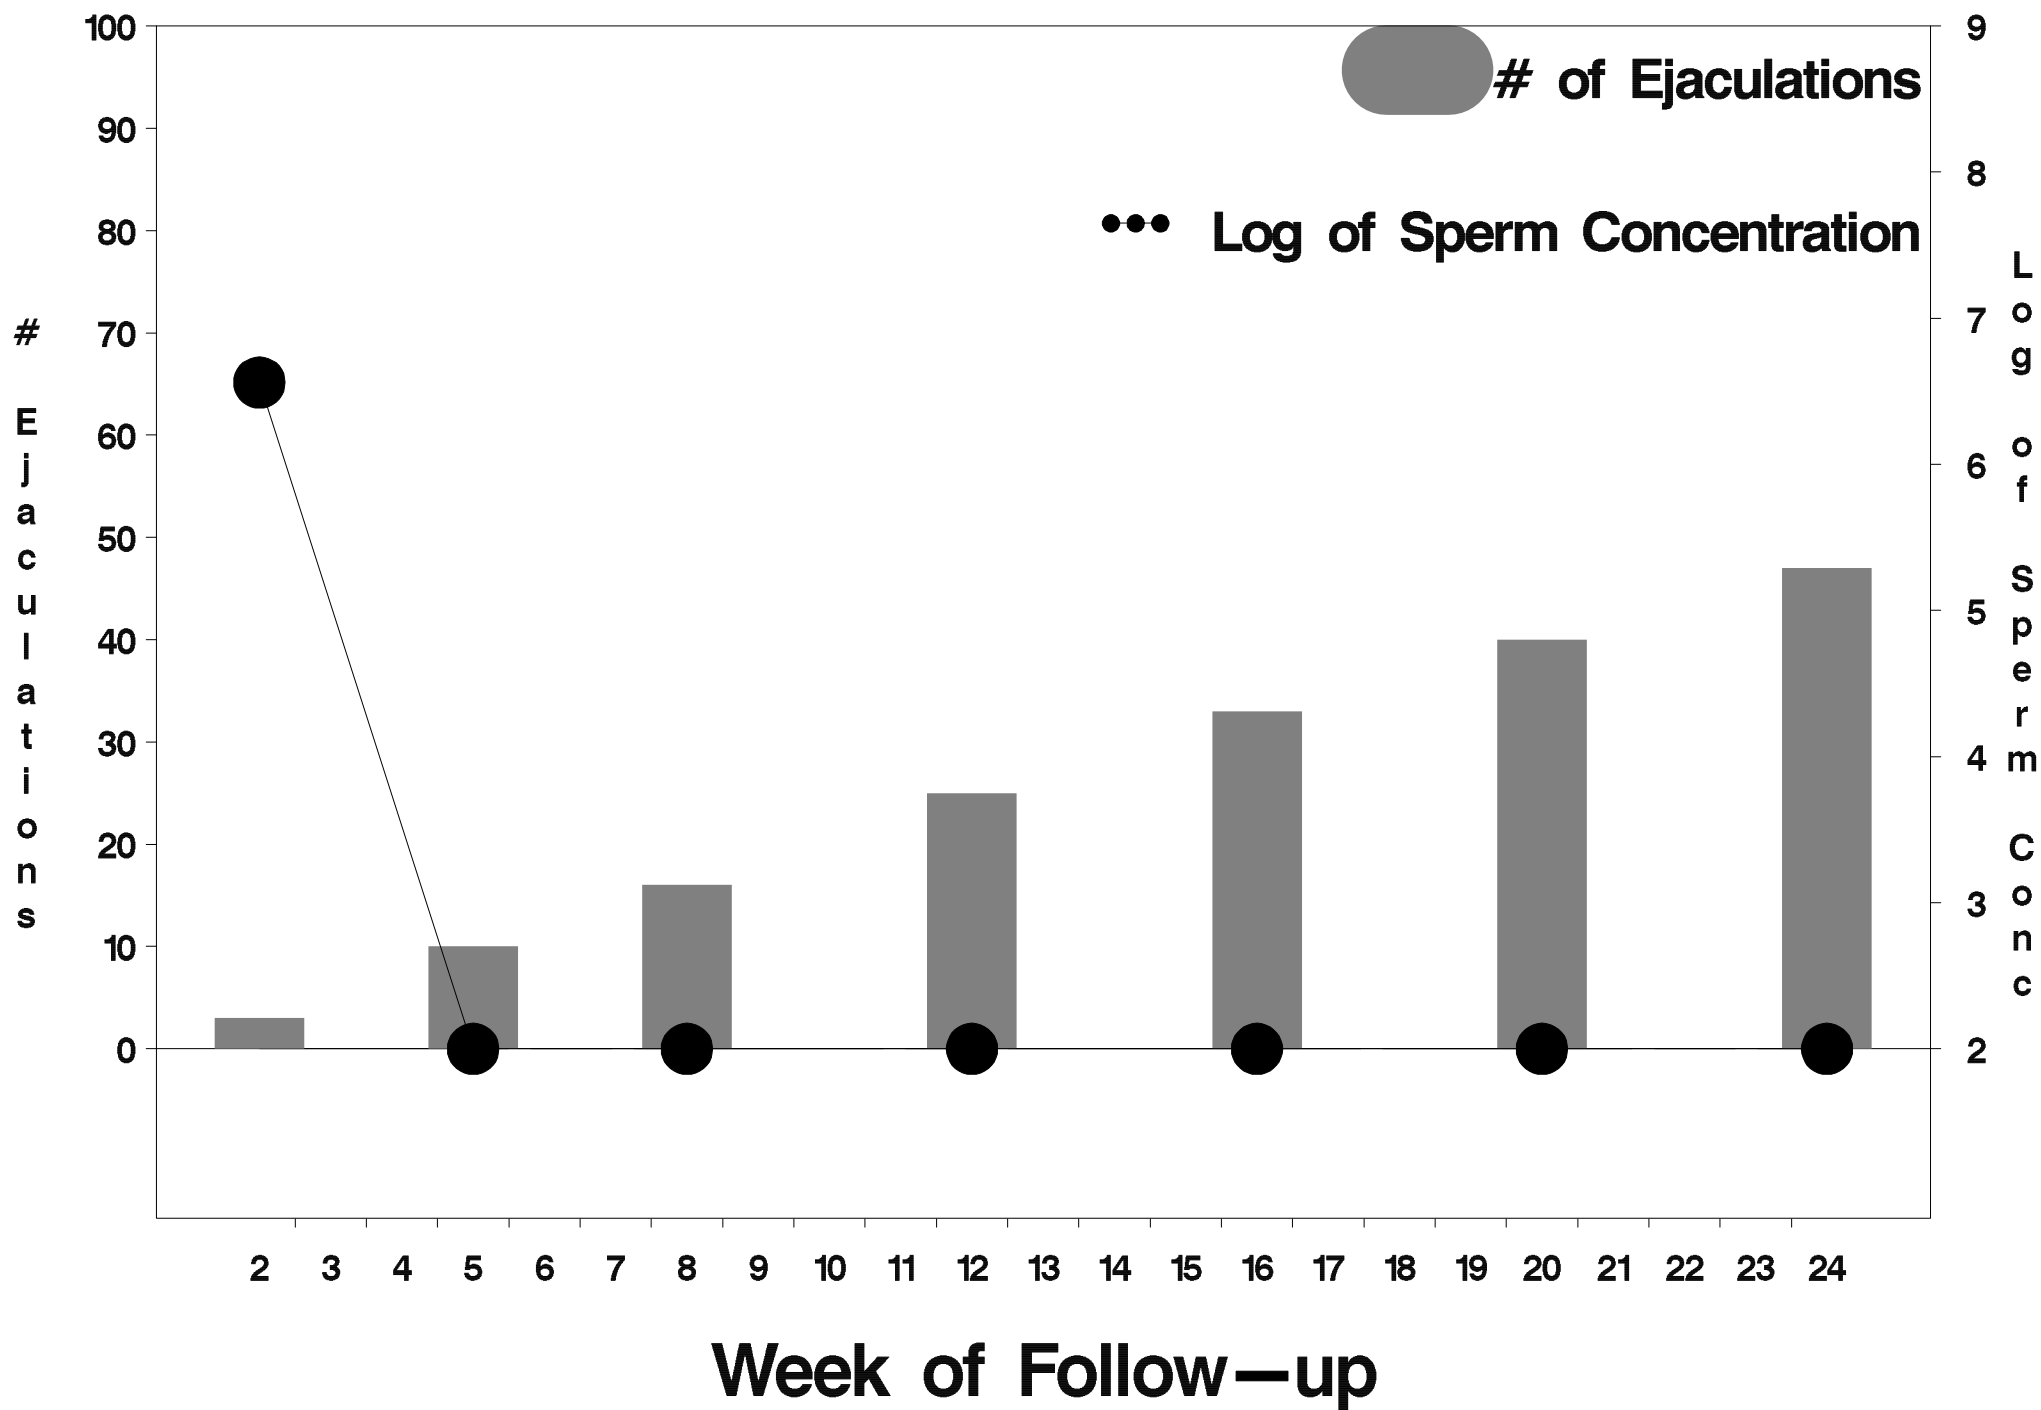

# Participant number= 135

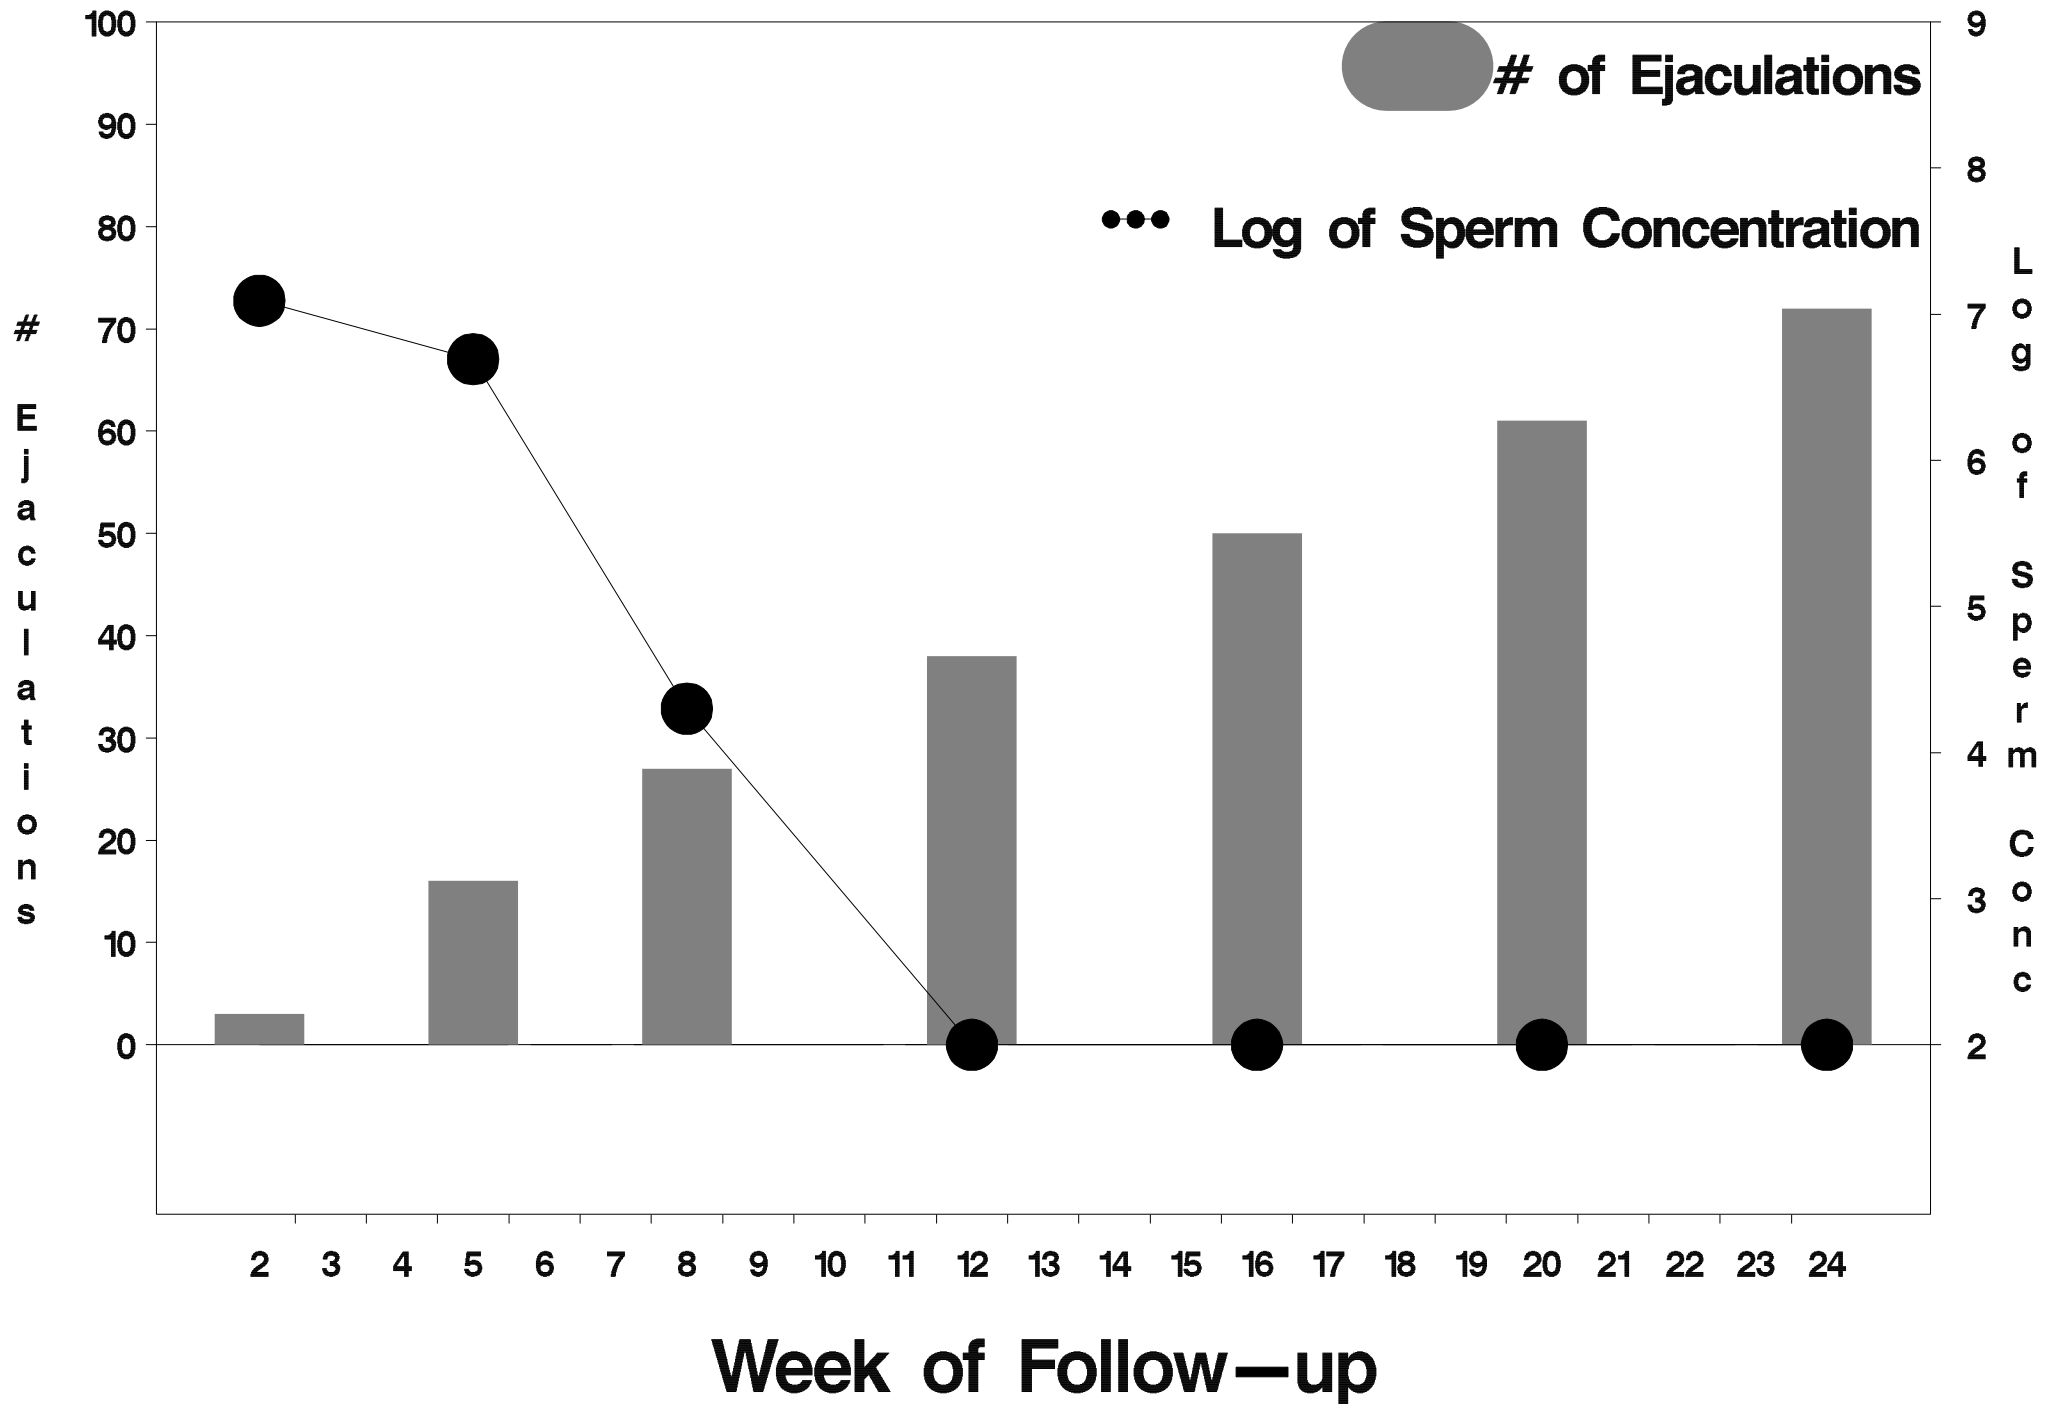

# Participant number= 136

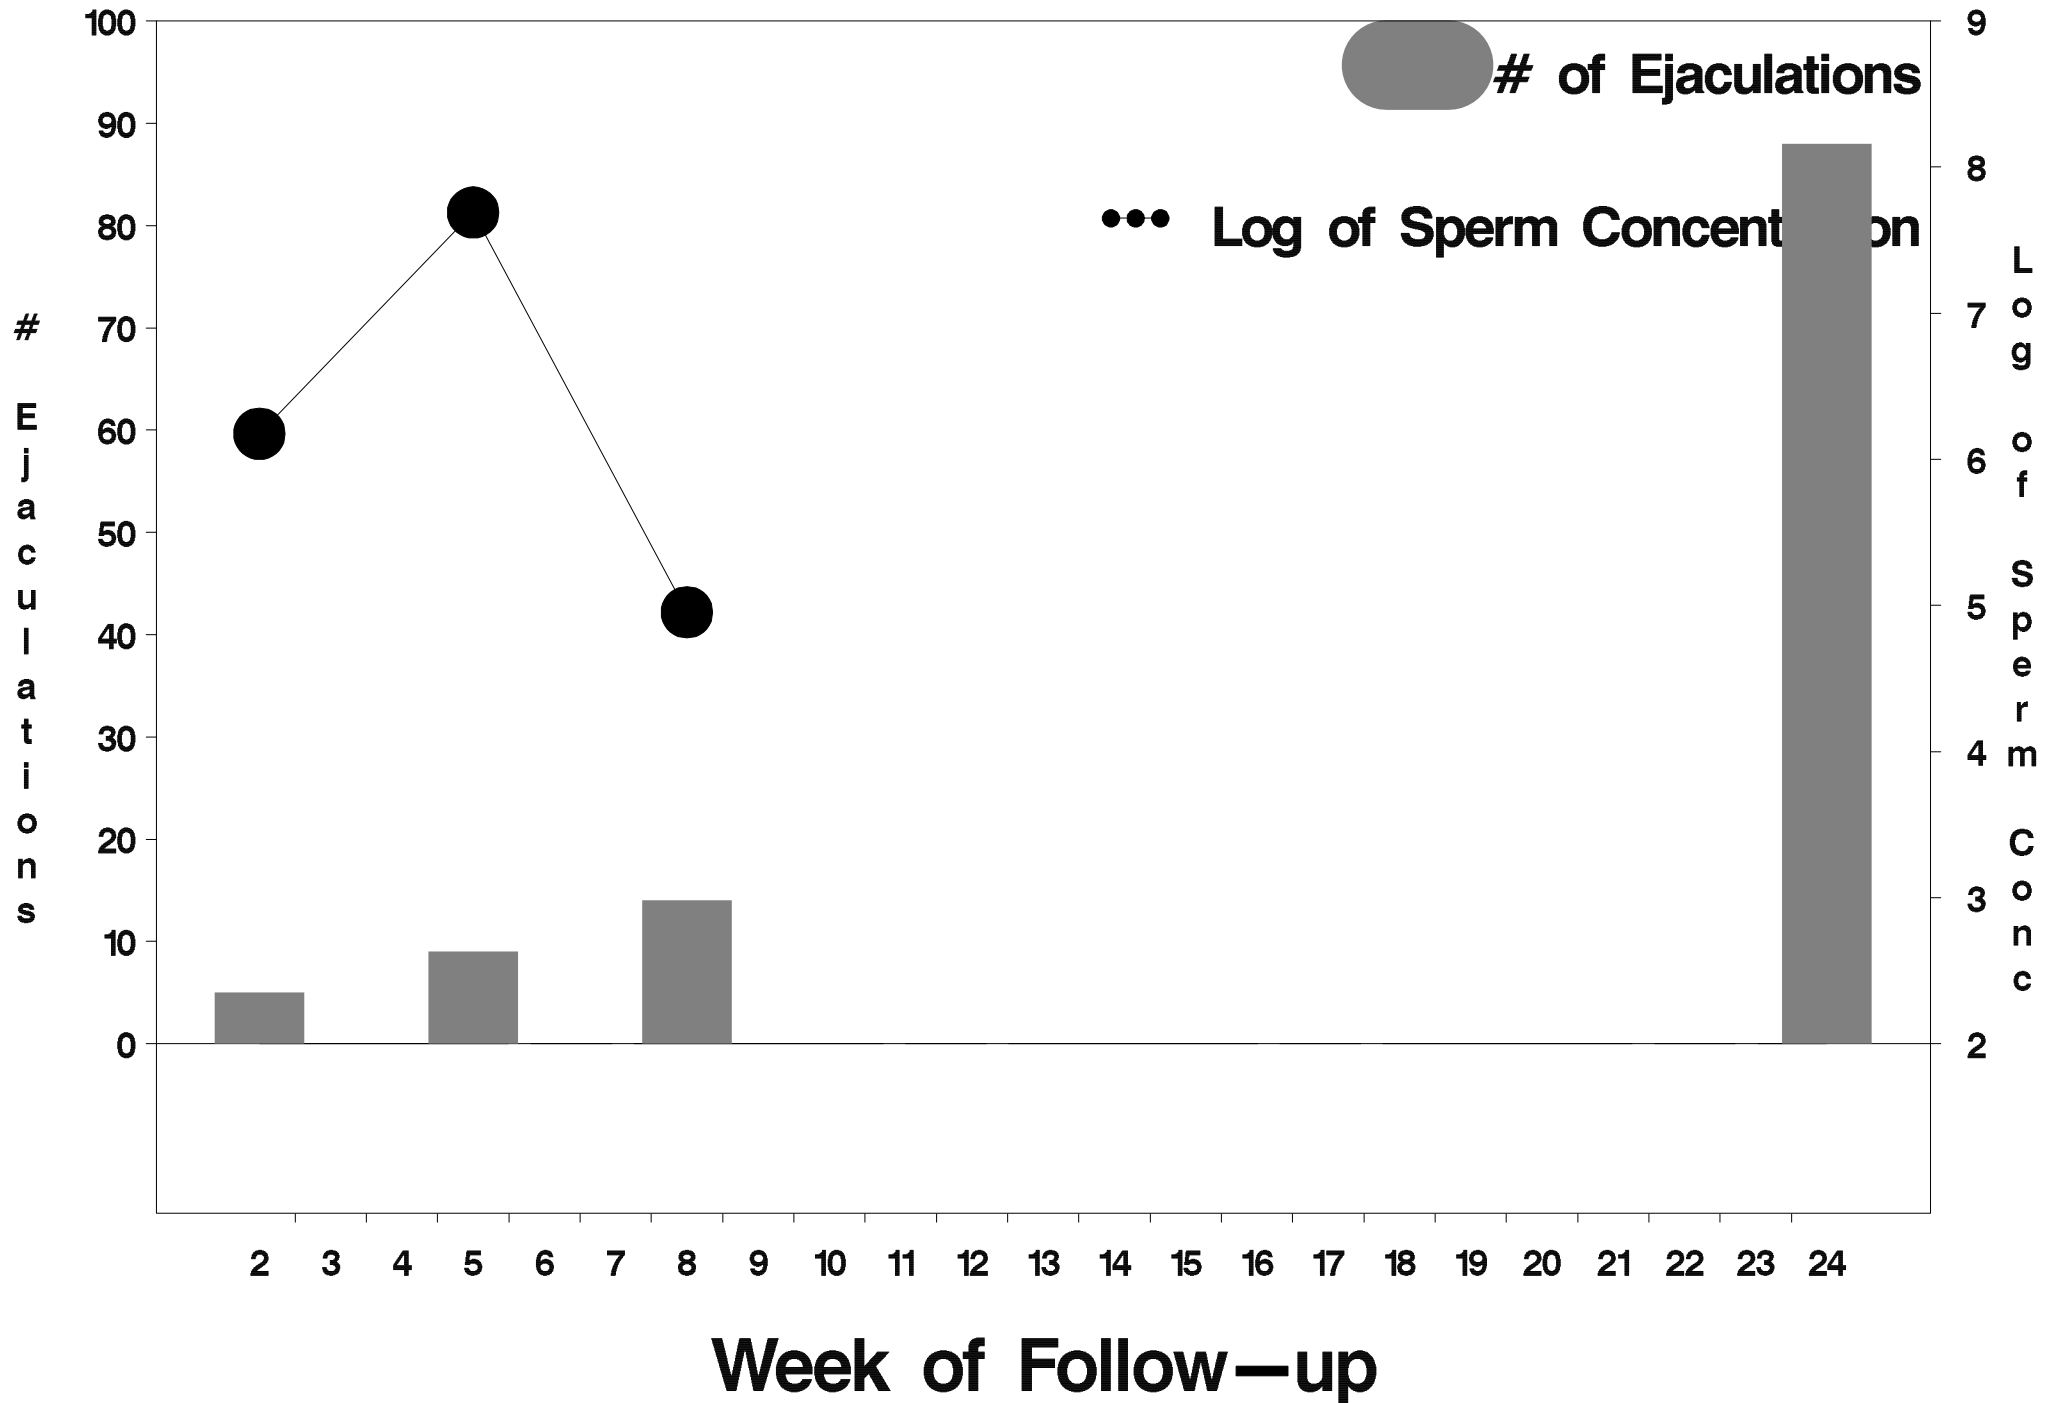

# Participant number= 137

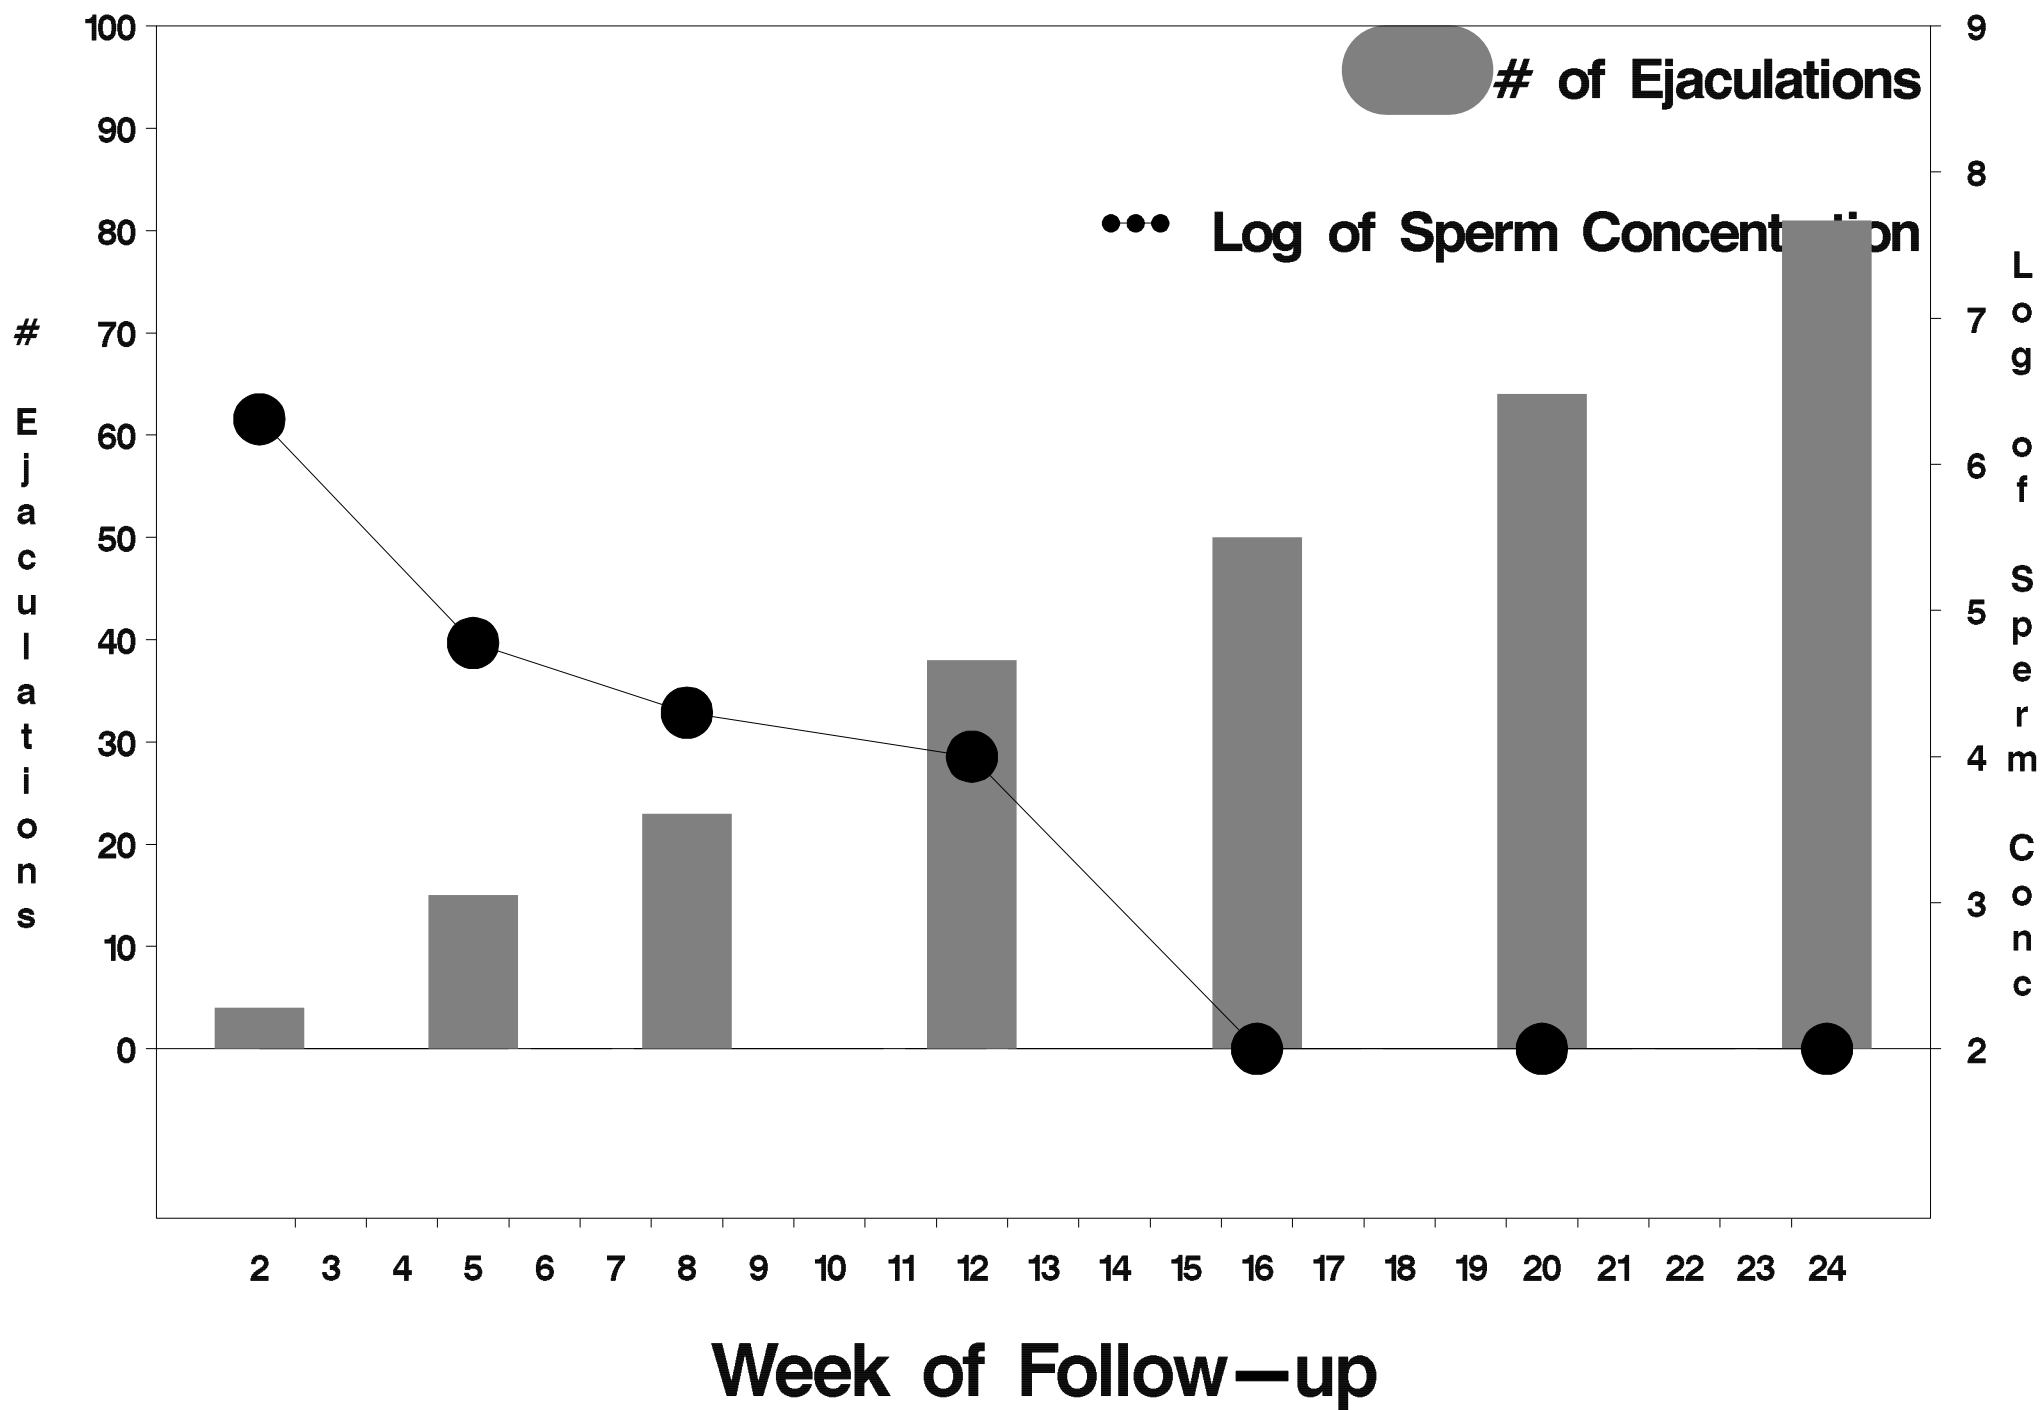

# Participant number= 138

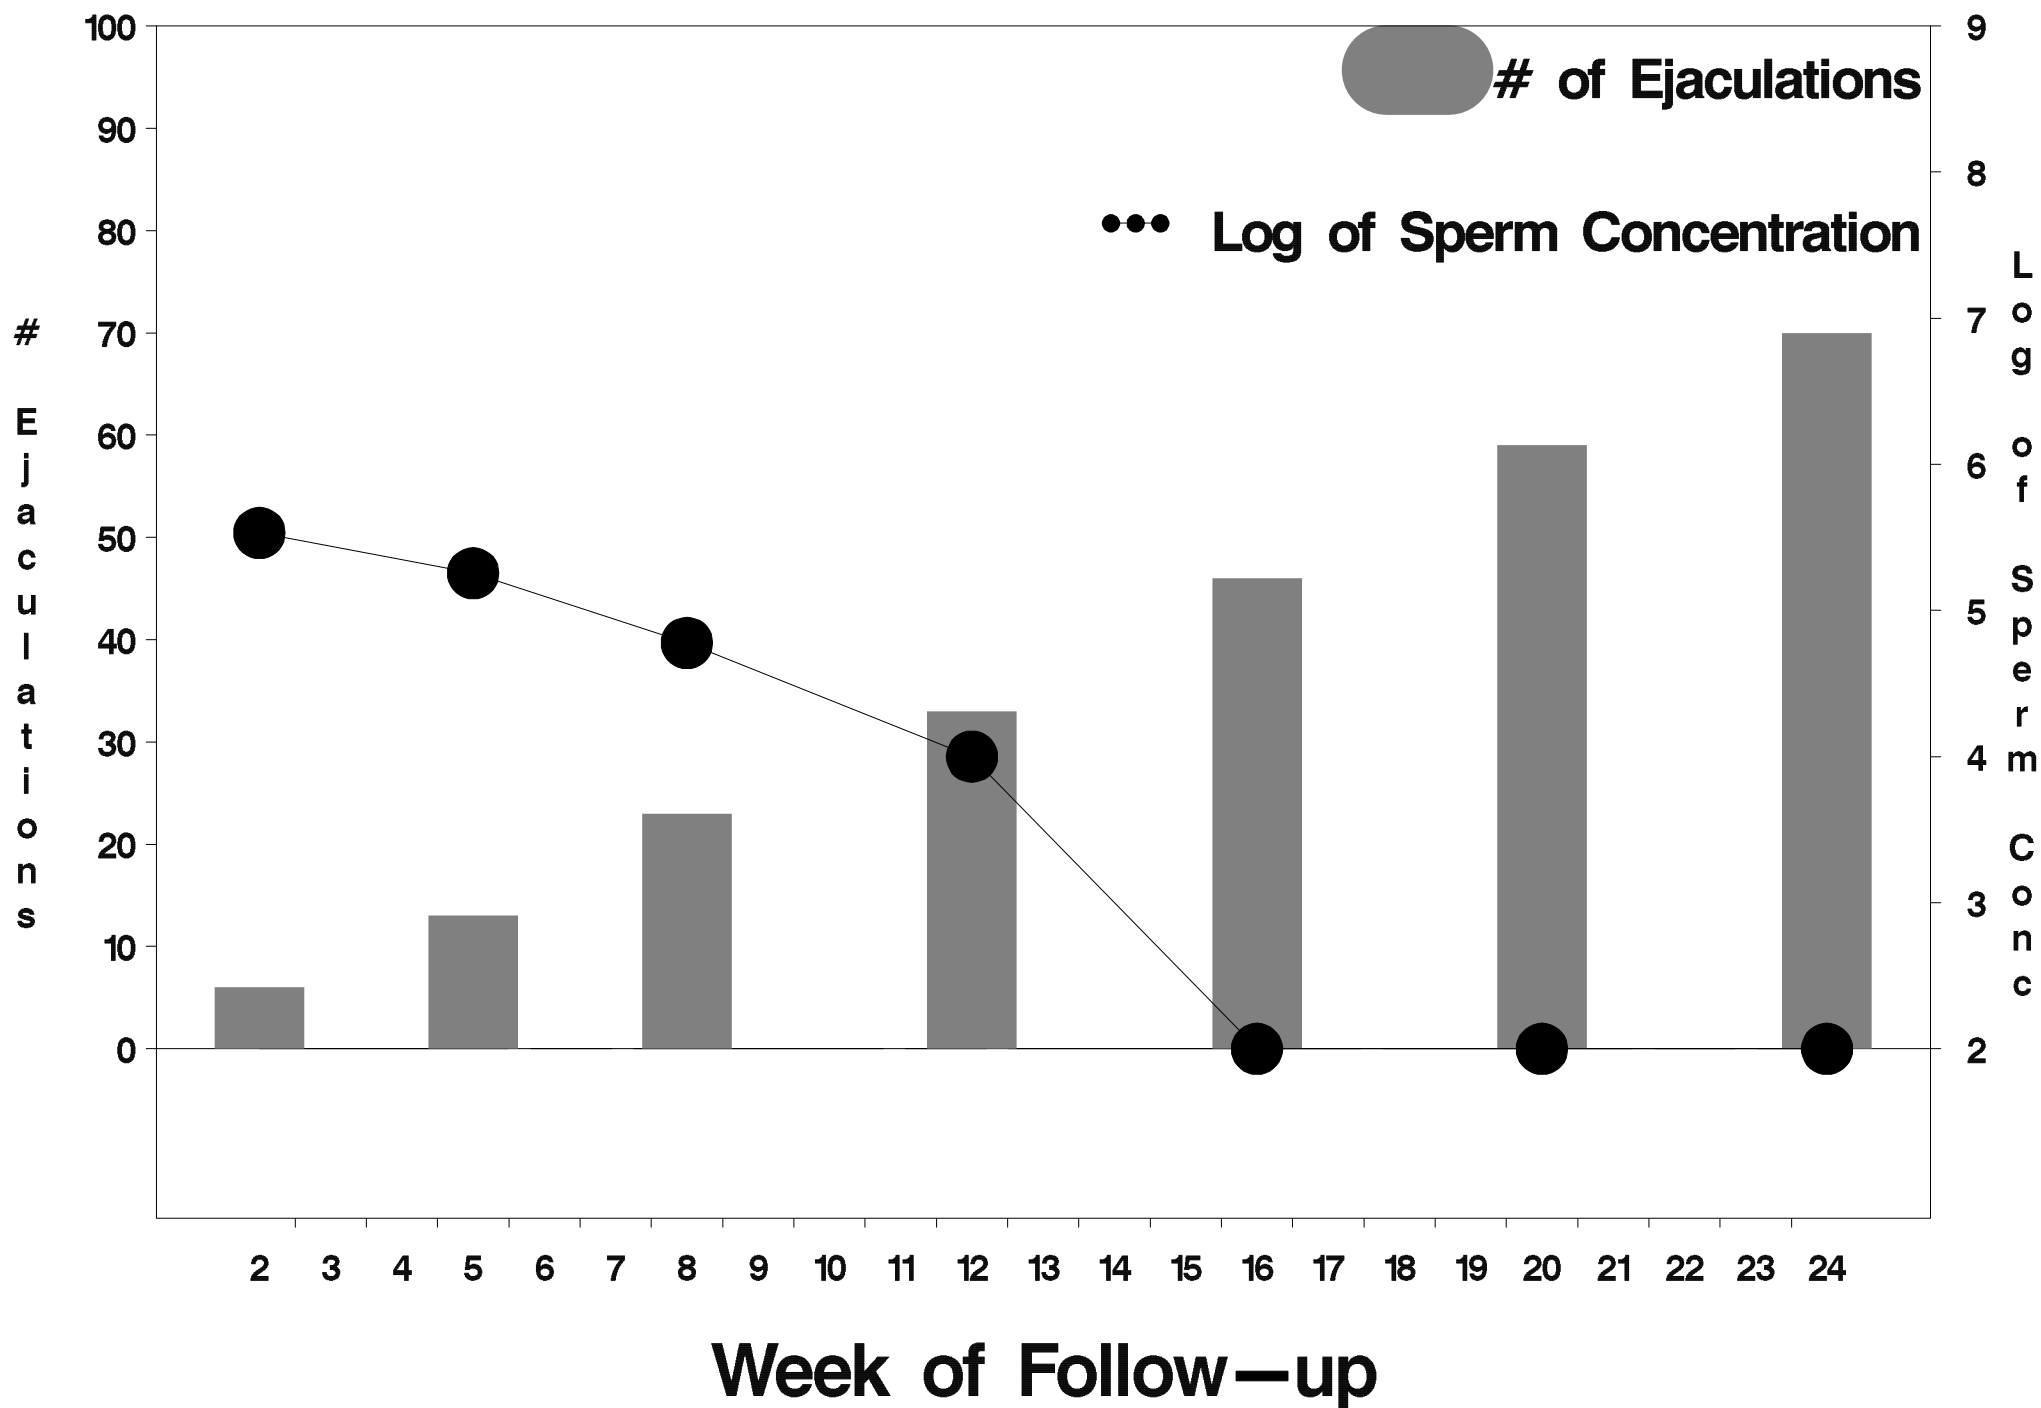

# Participant number= 139

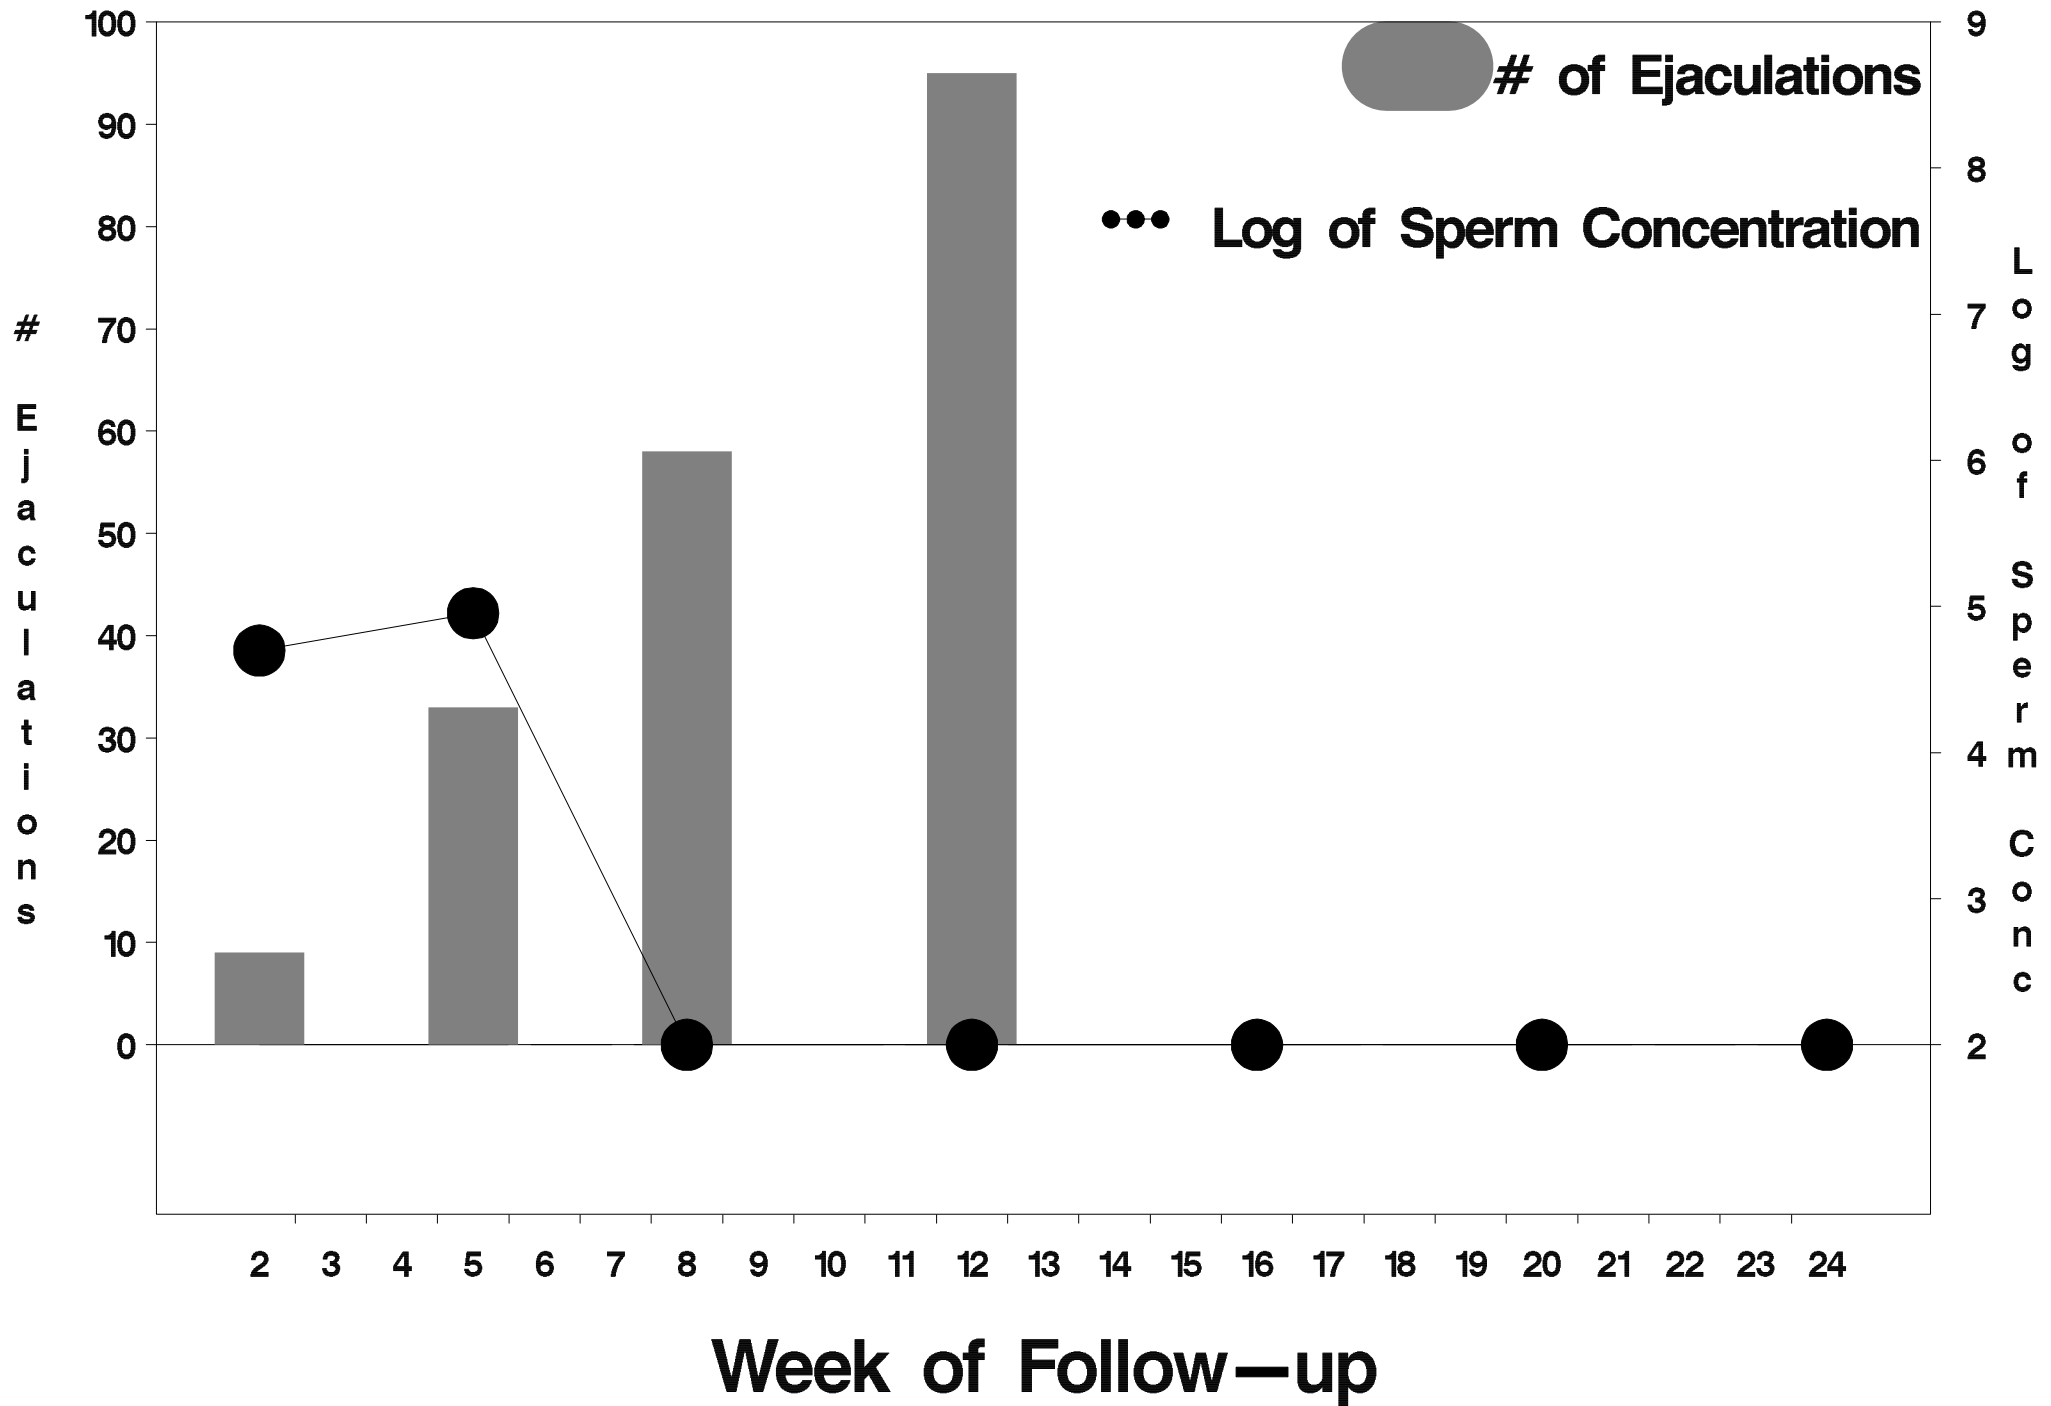

# Participant number= 140

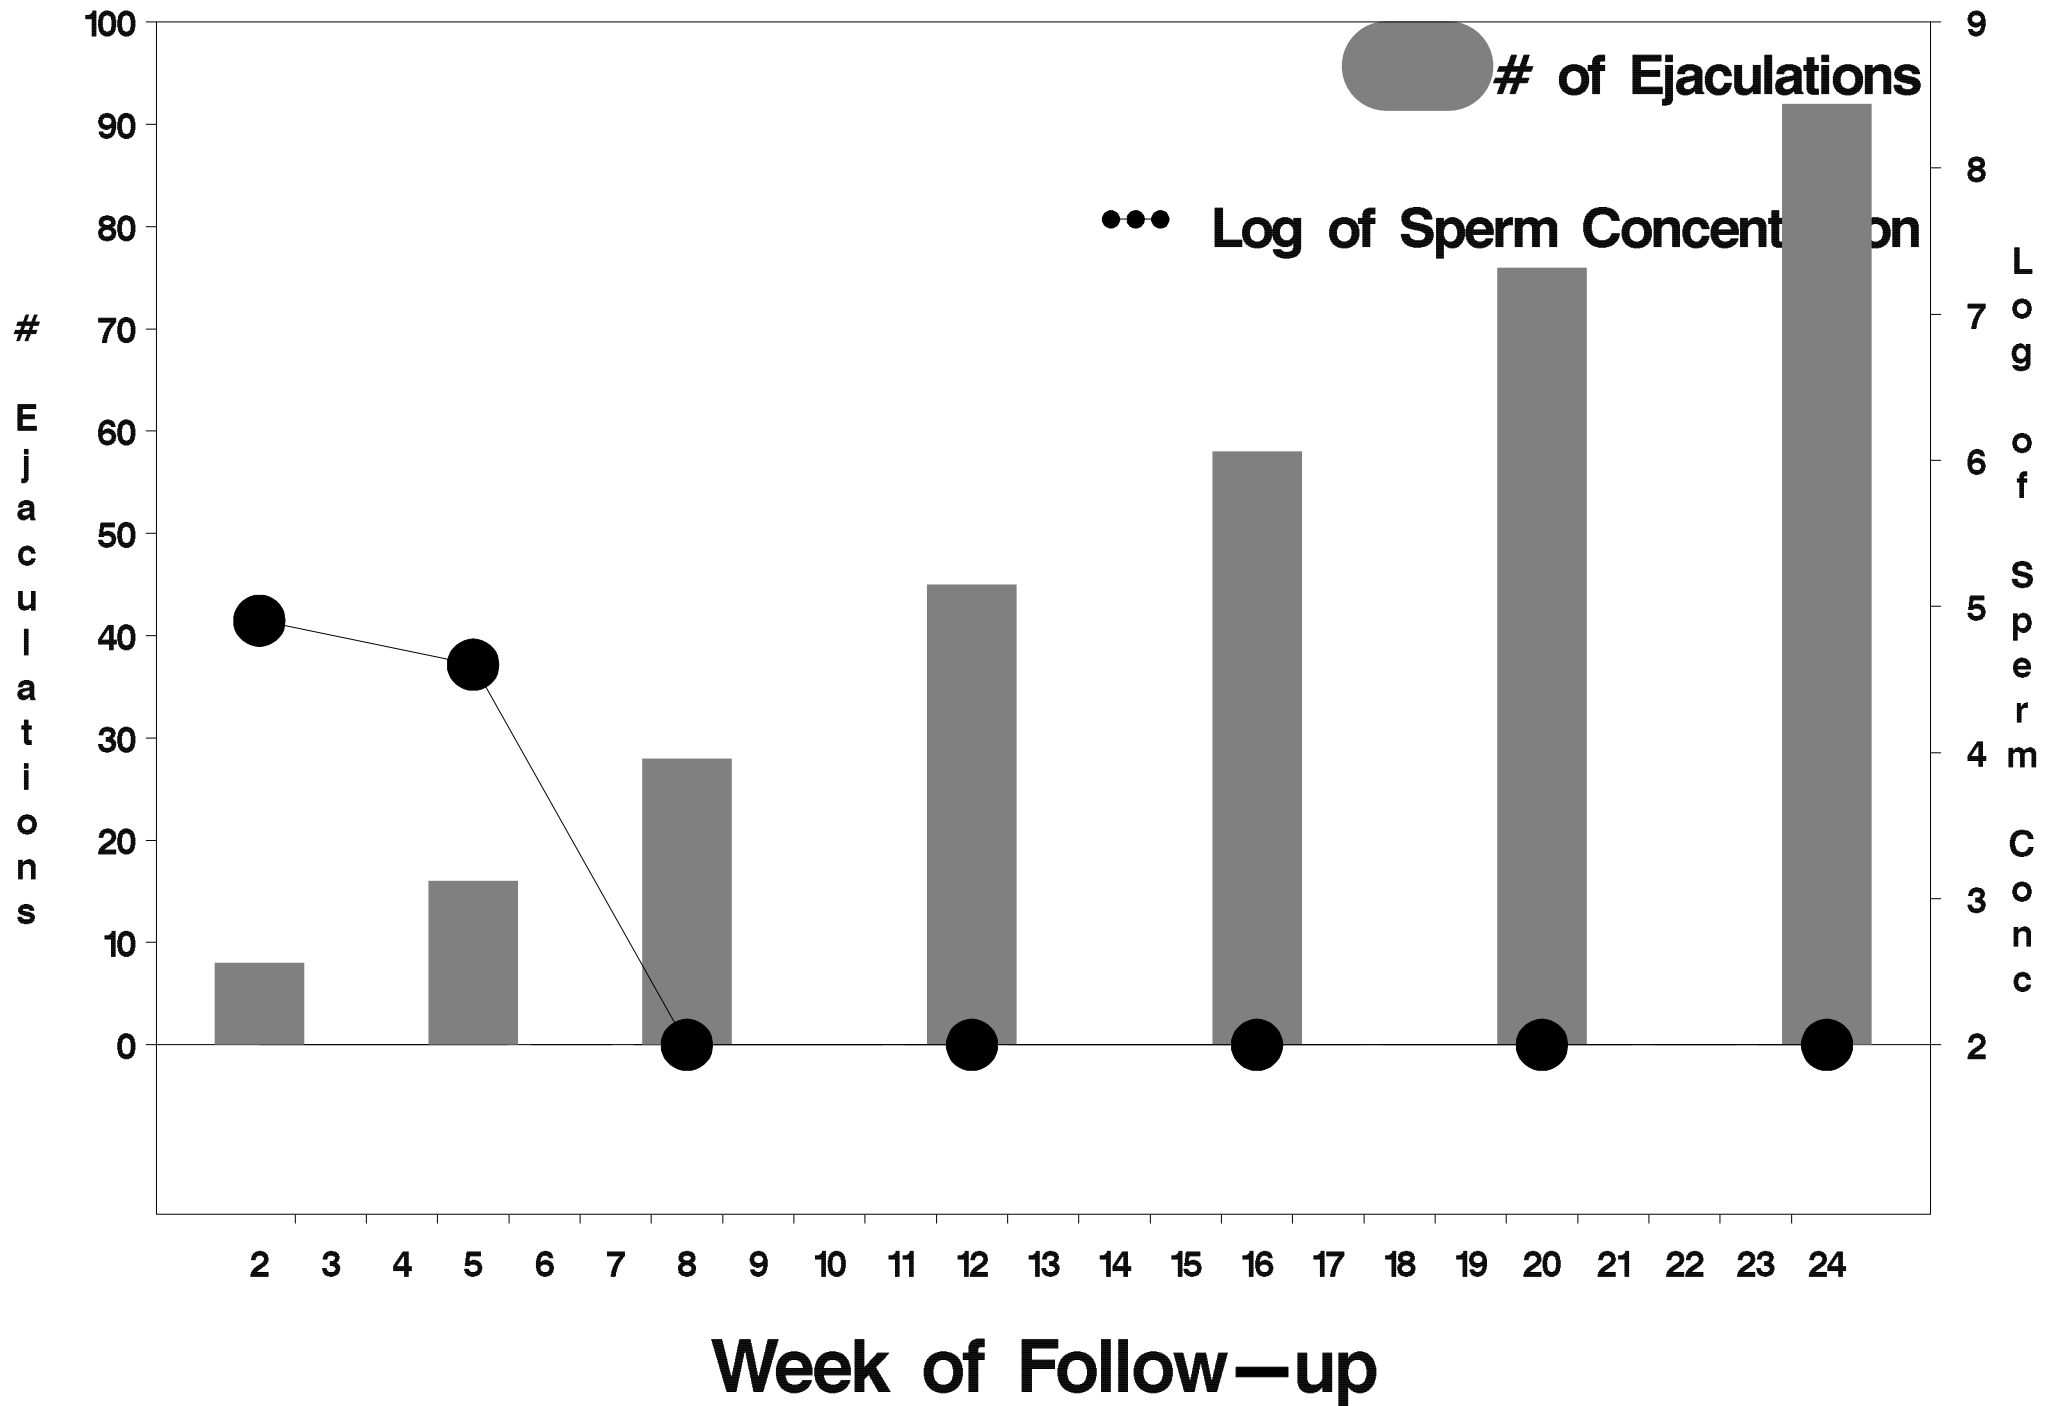



# Participant number= 141

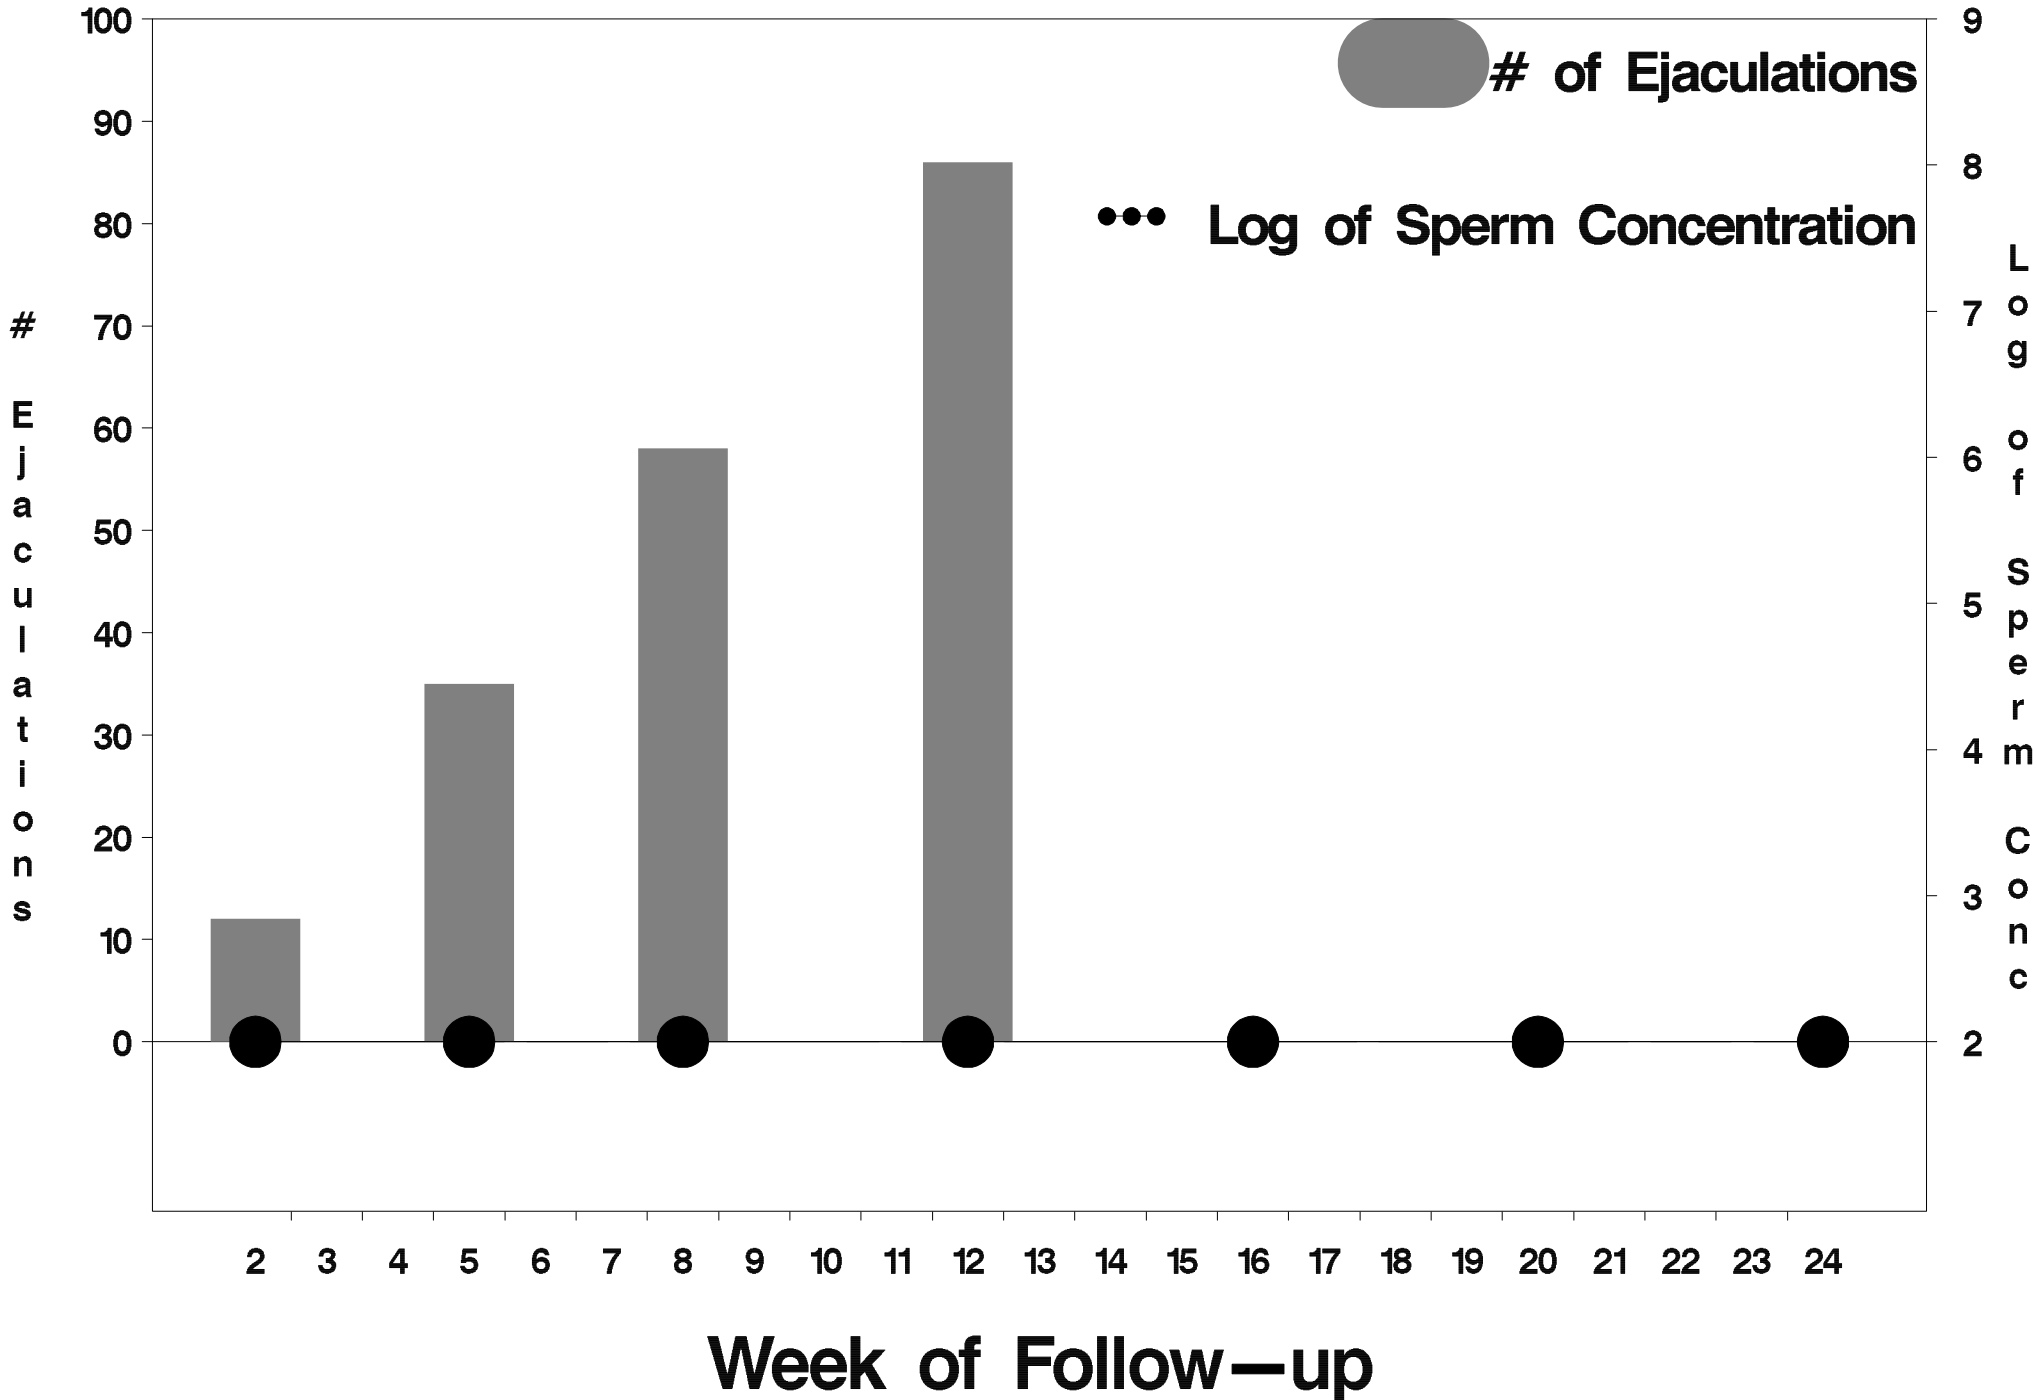

# Participant number= 142

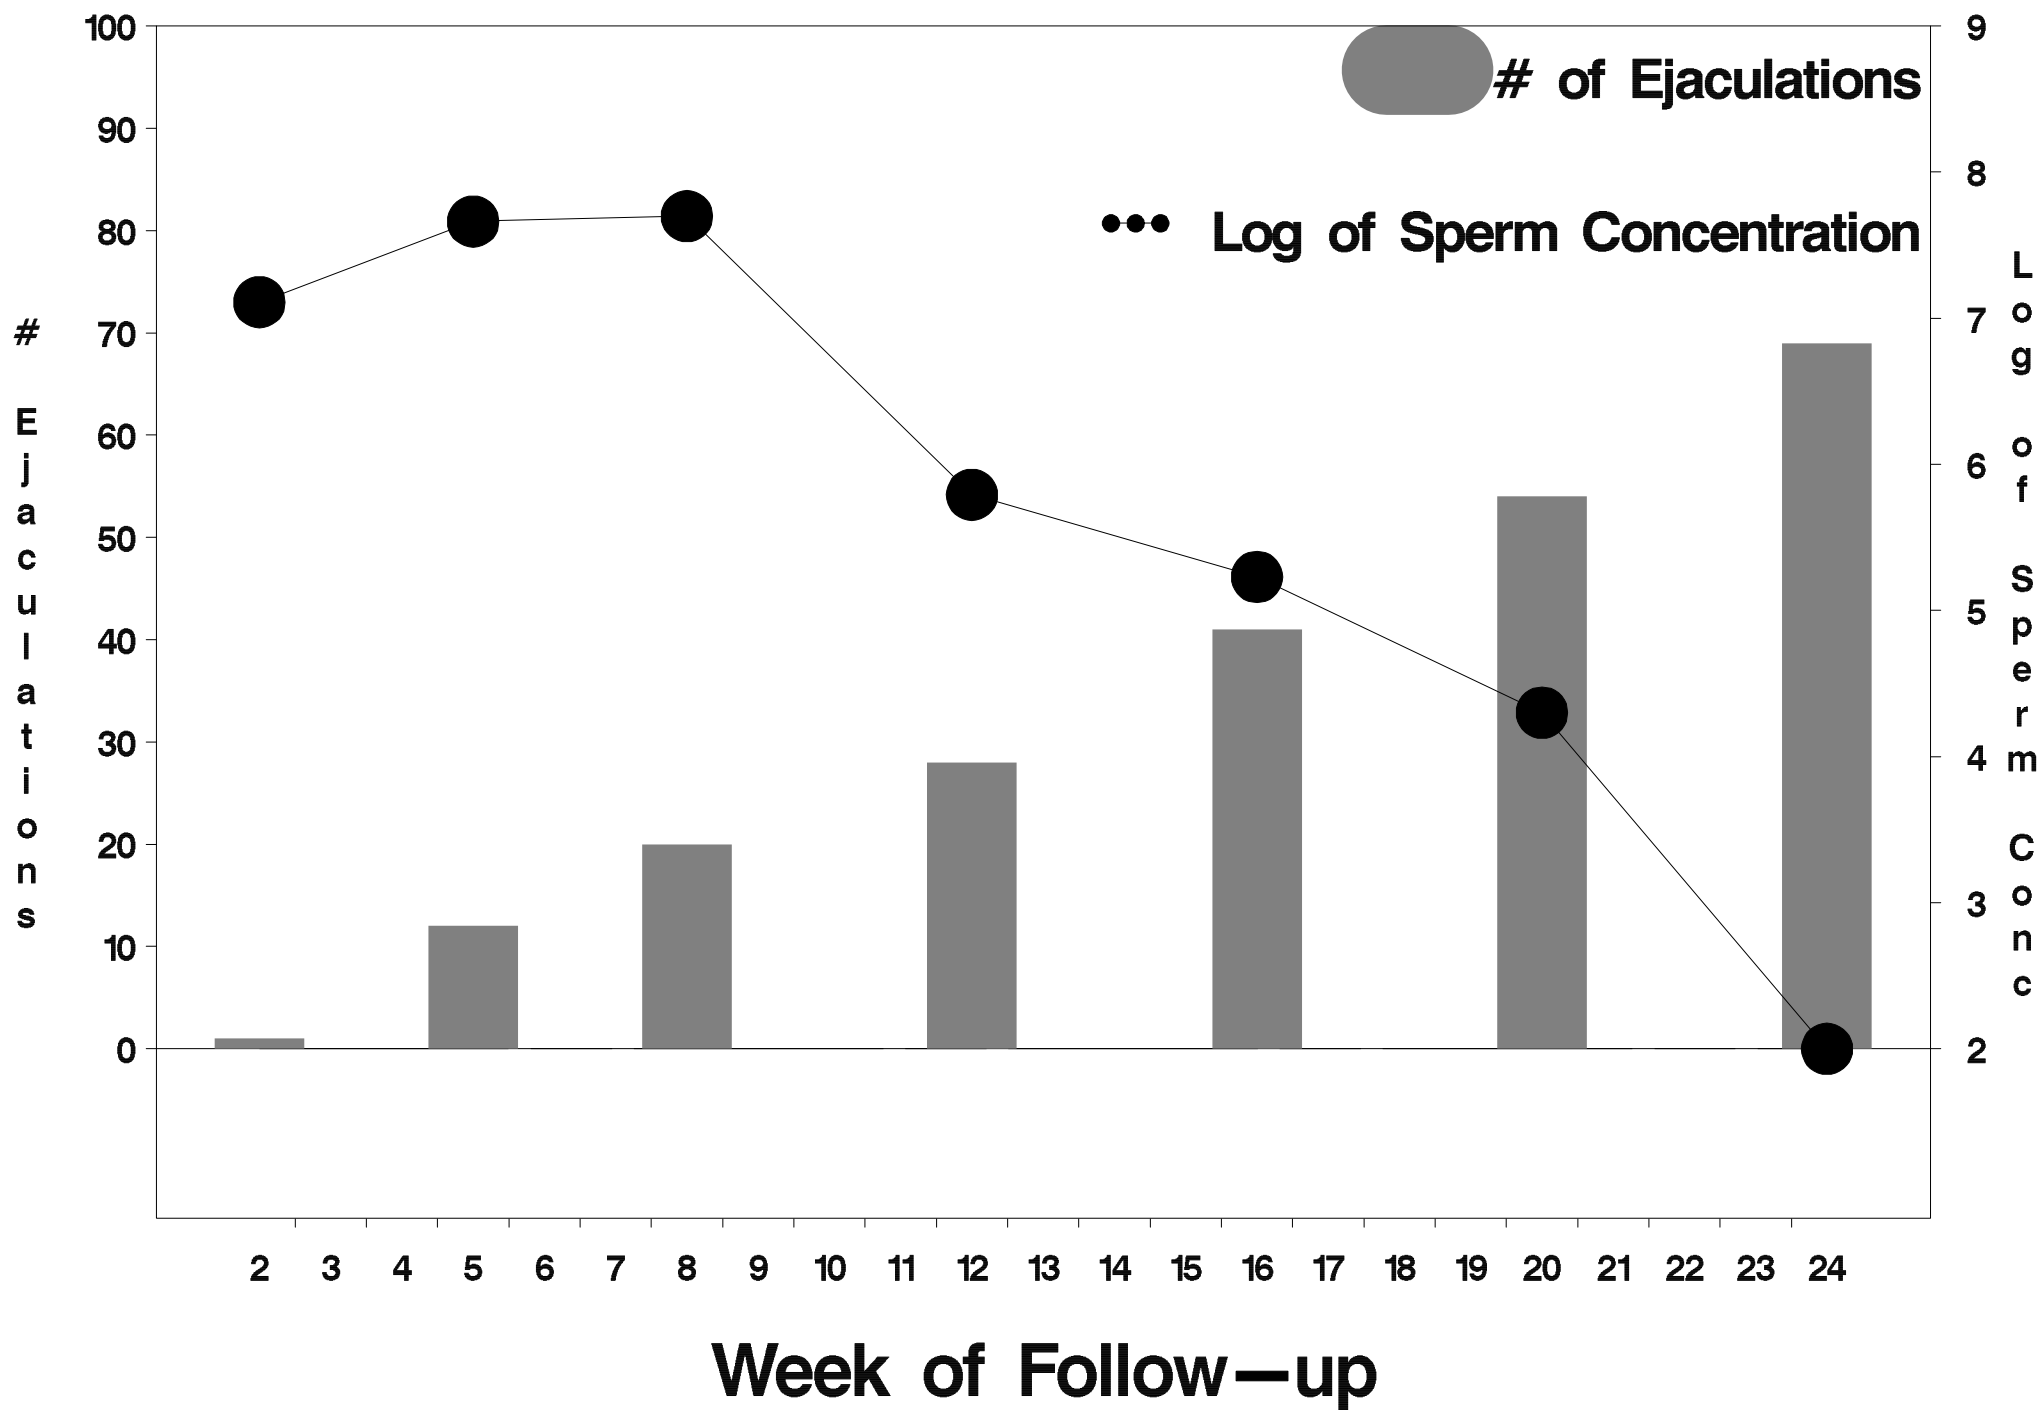

# Participant number= 143

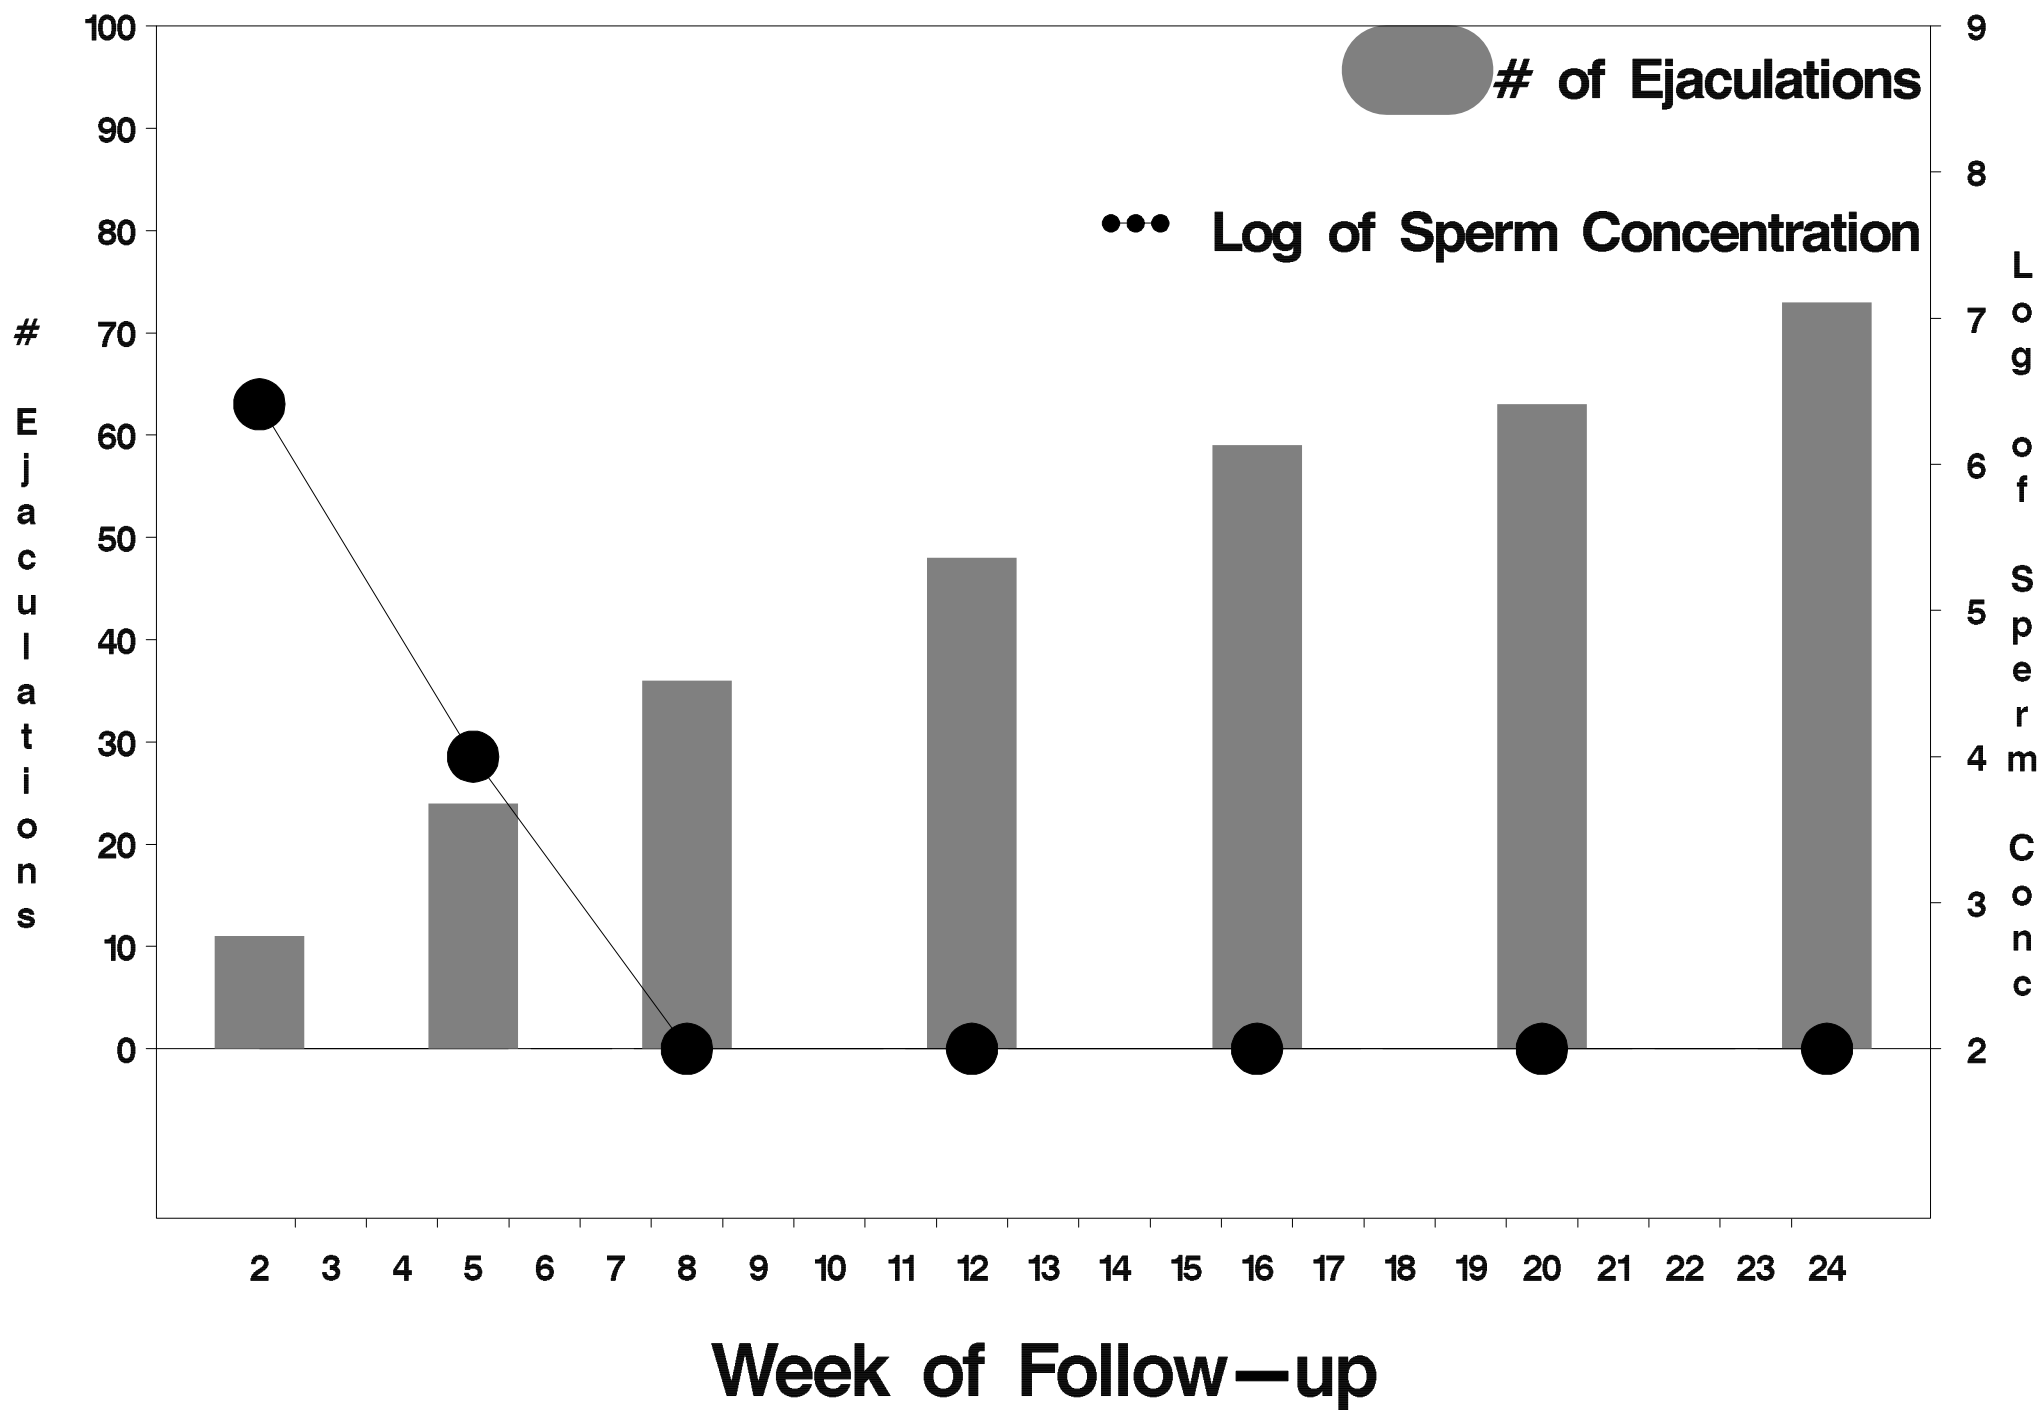

# Participant number= 144

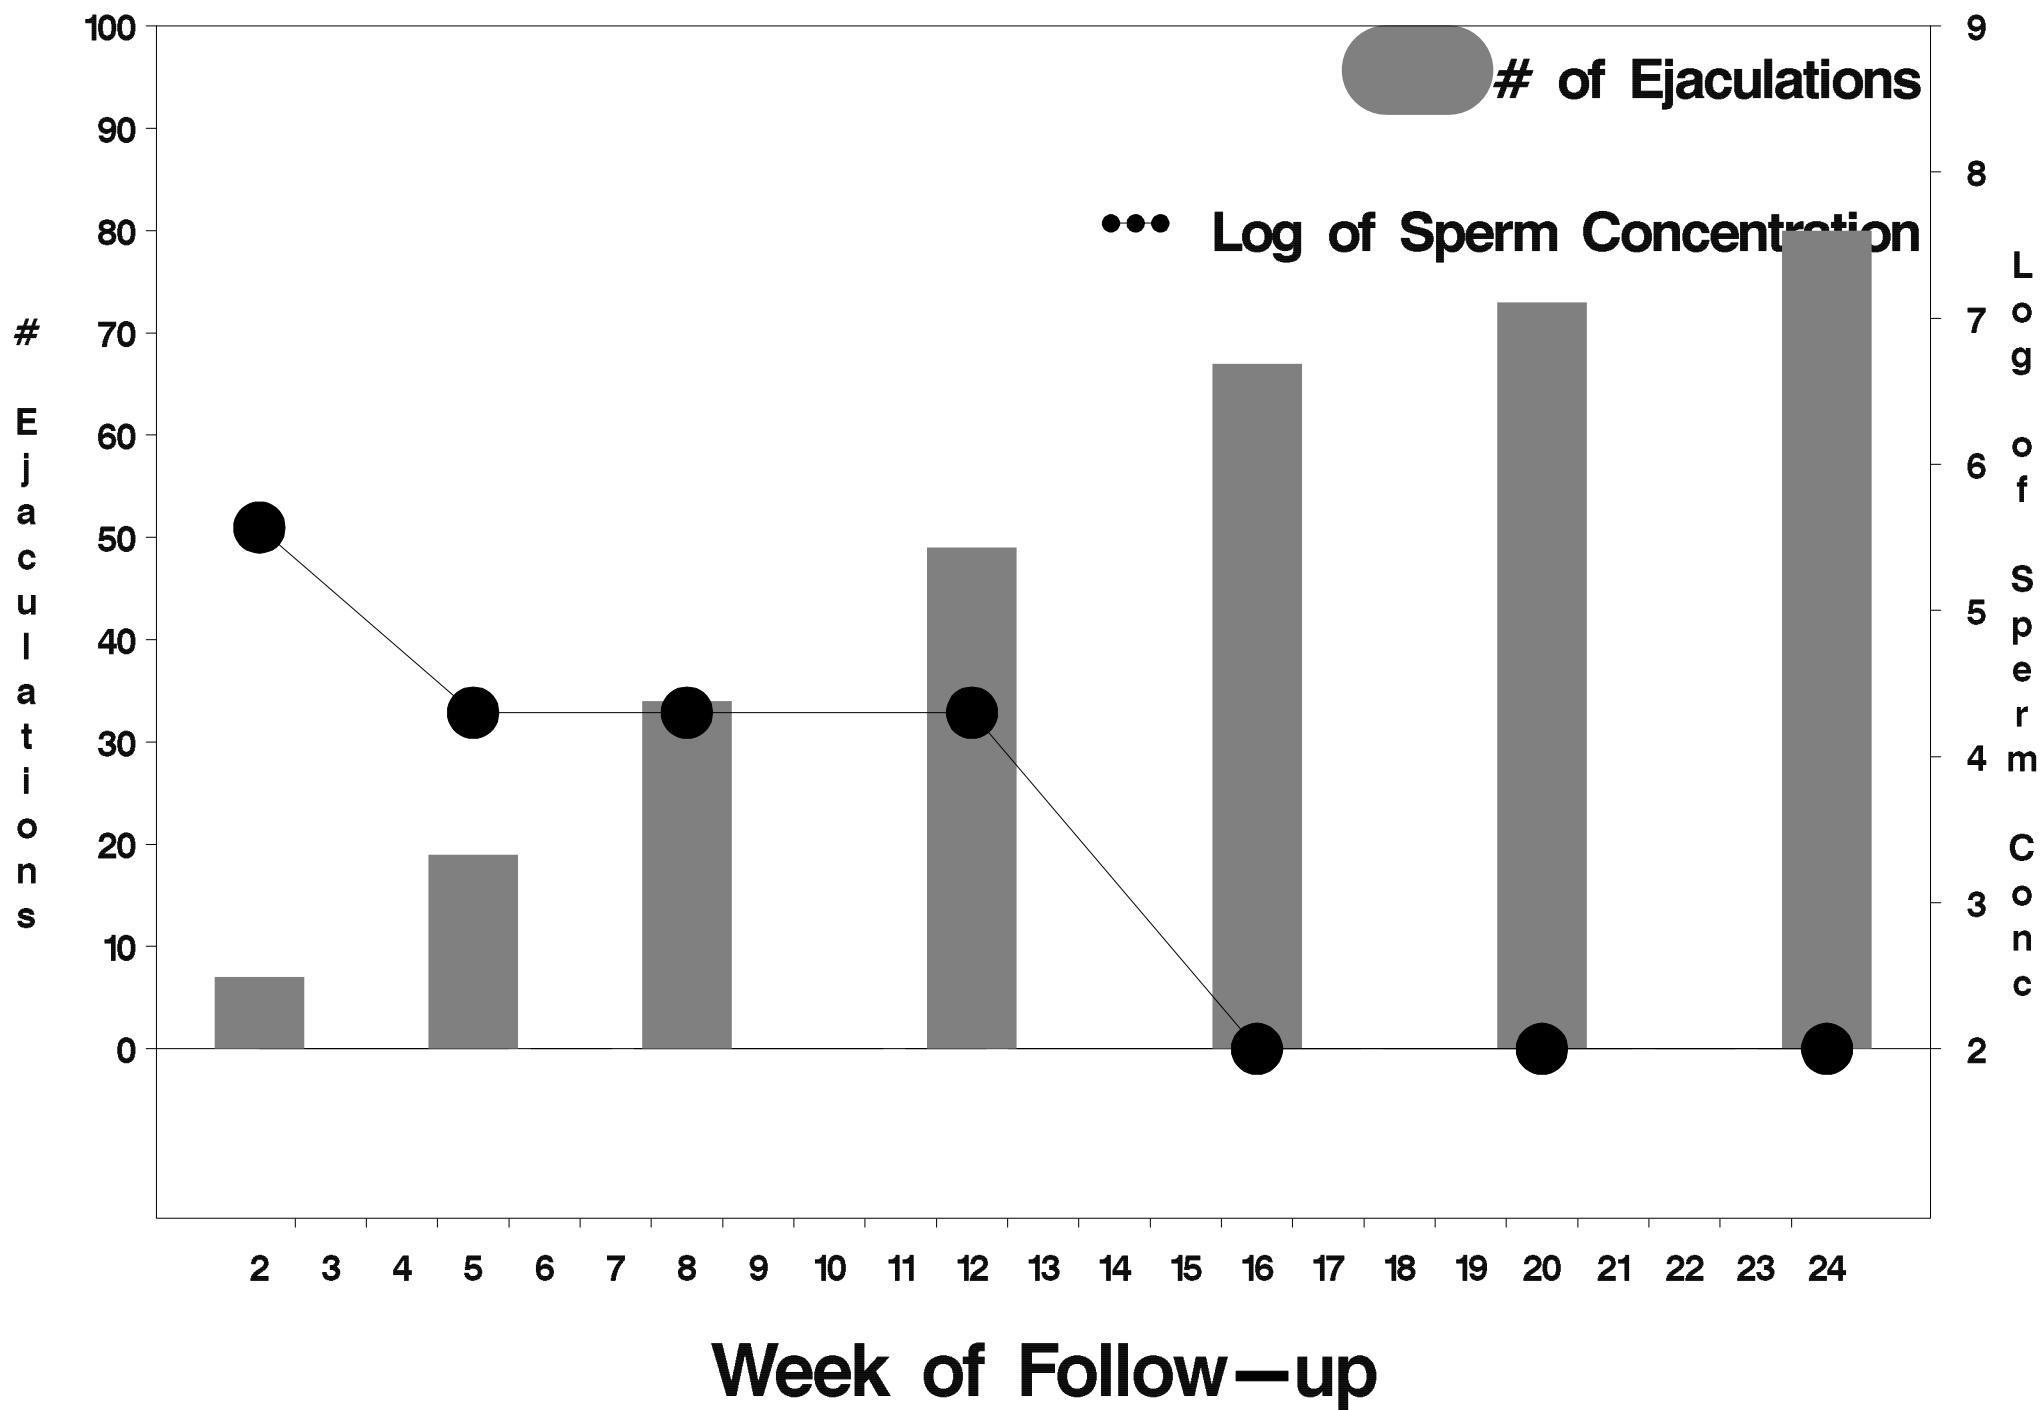

# Participant number= 145

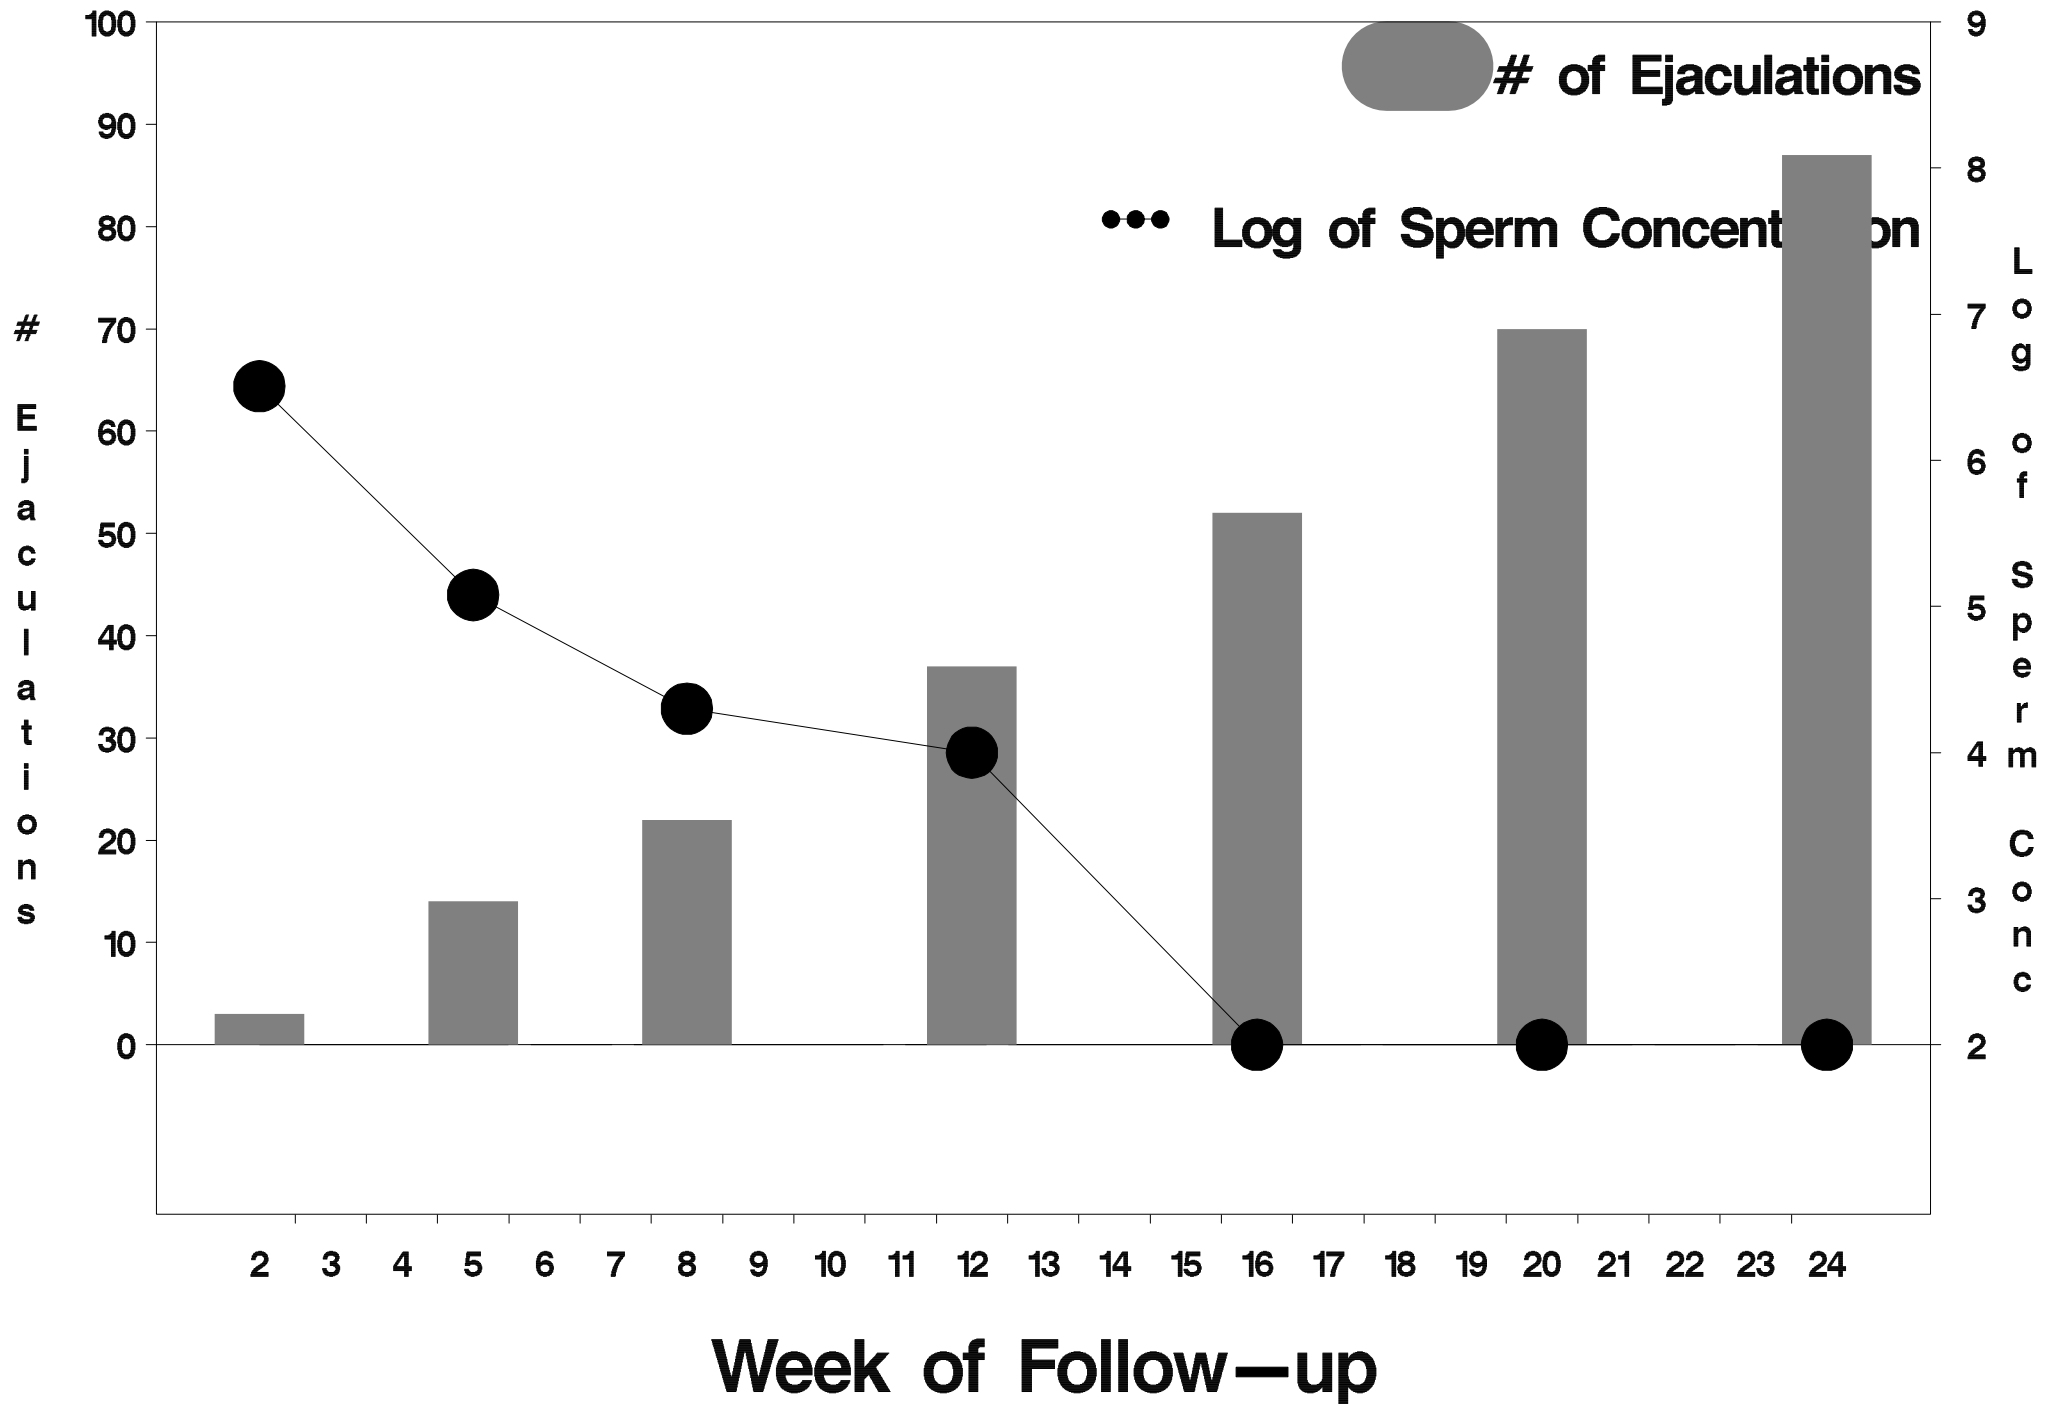

# Participant number= 146

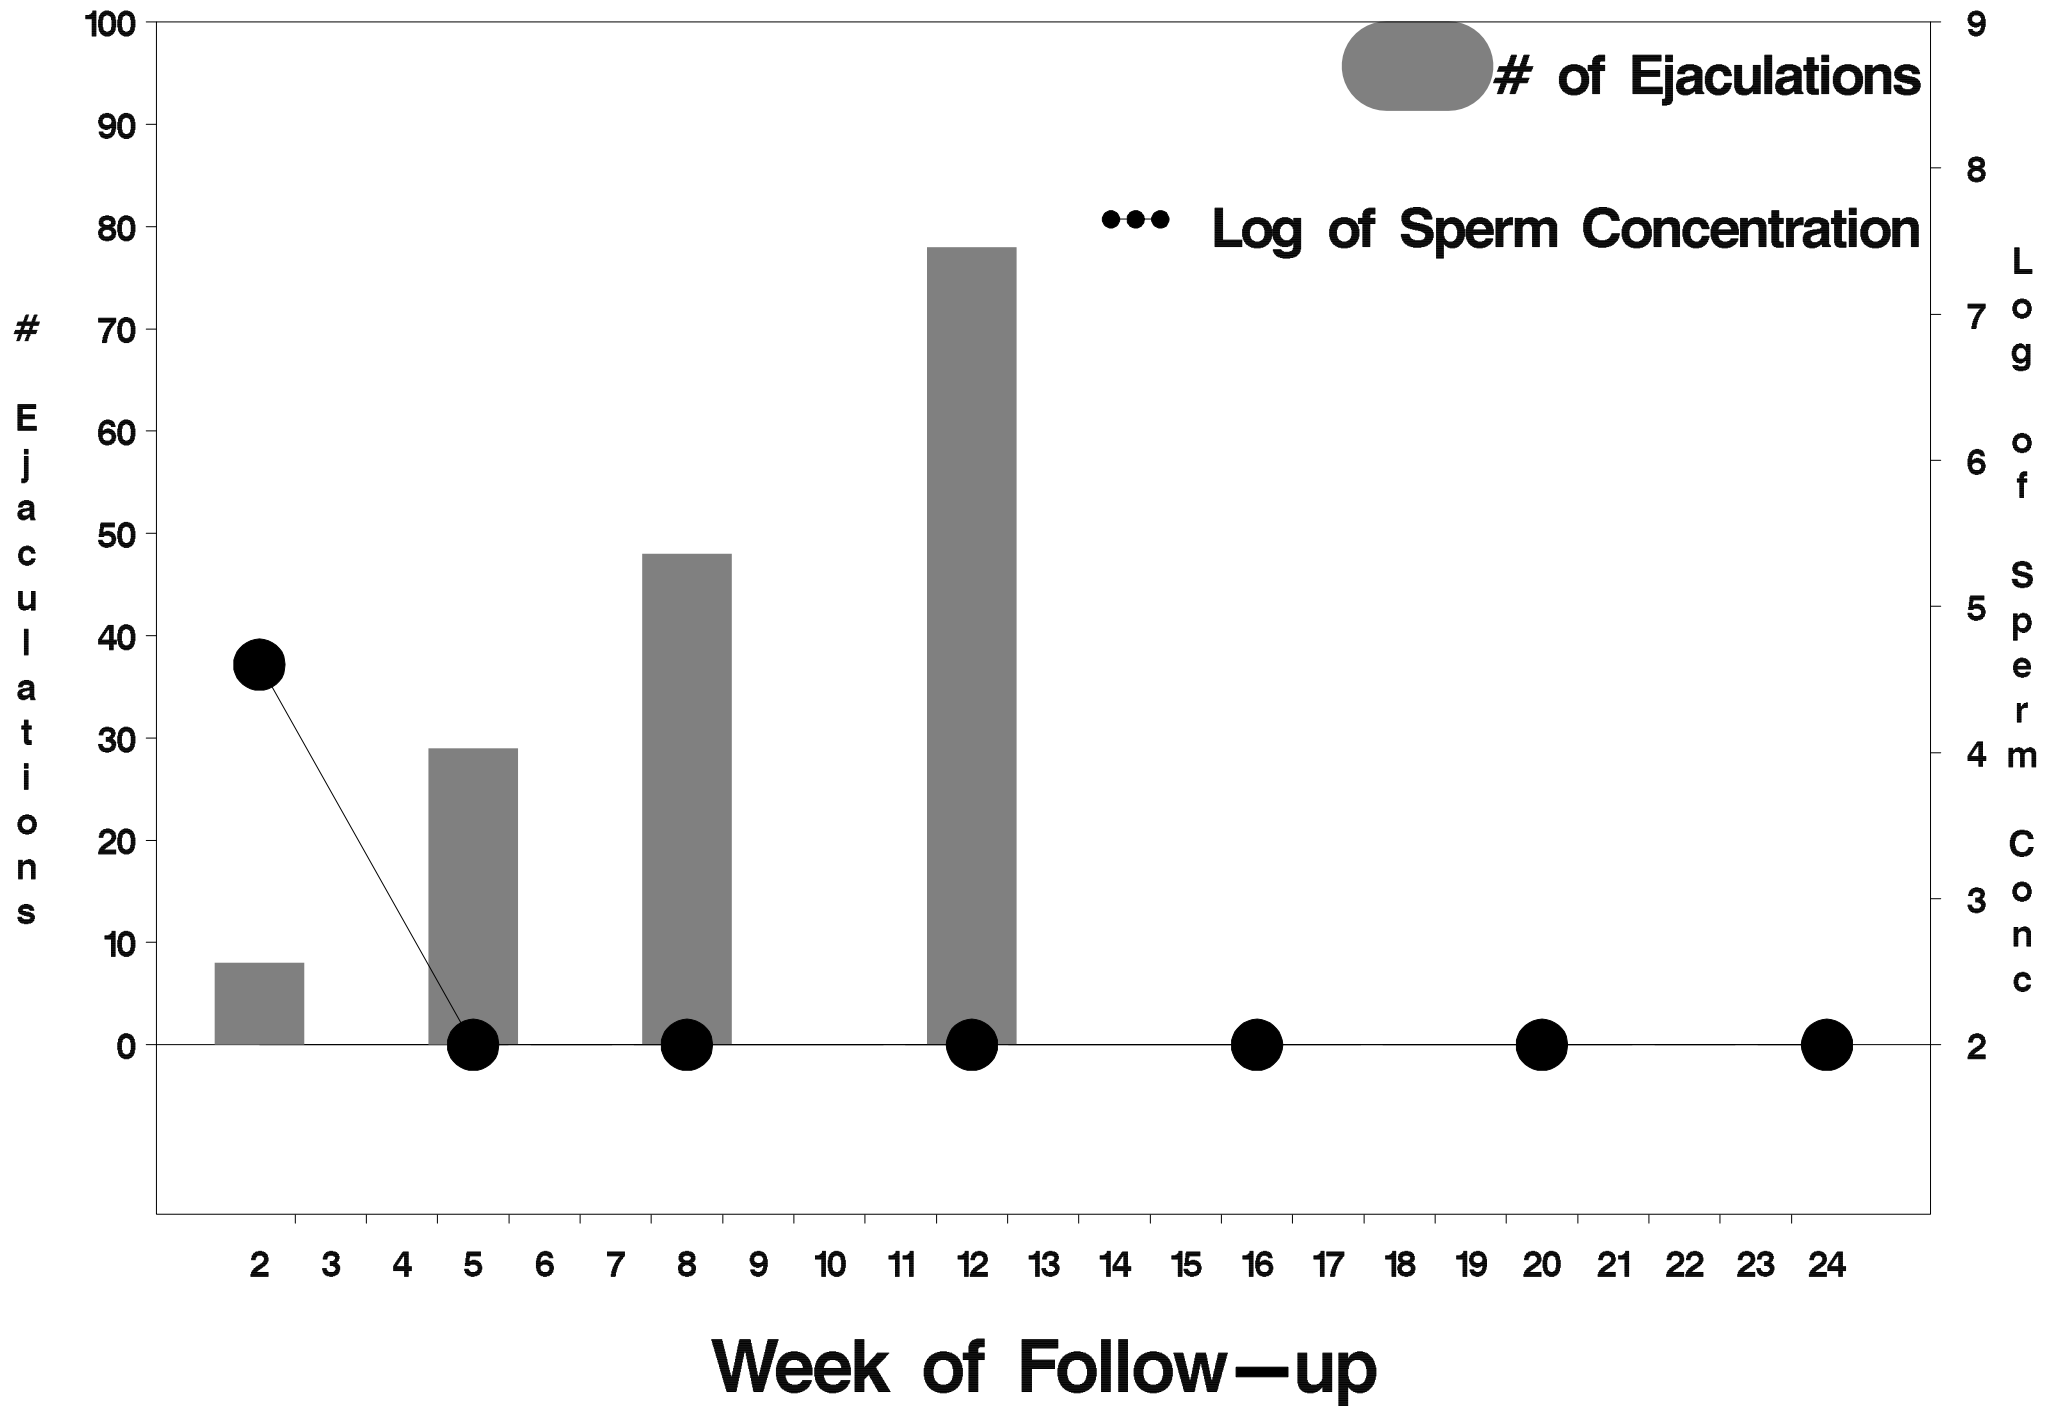

# Participant number= 147

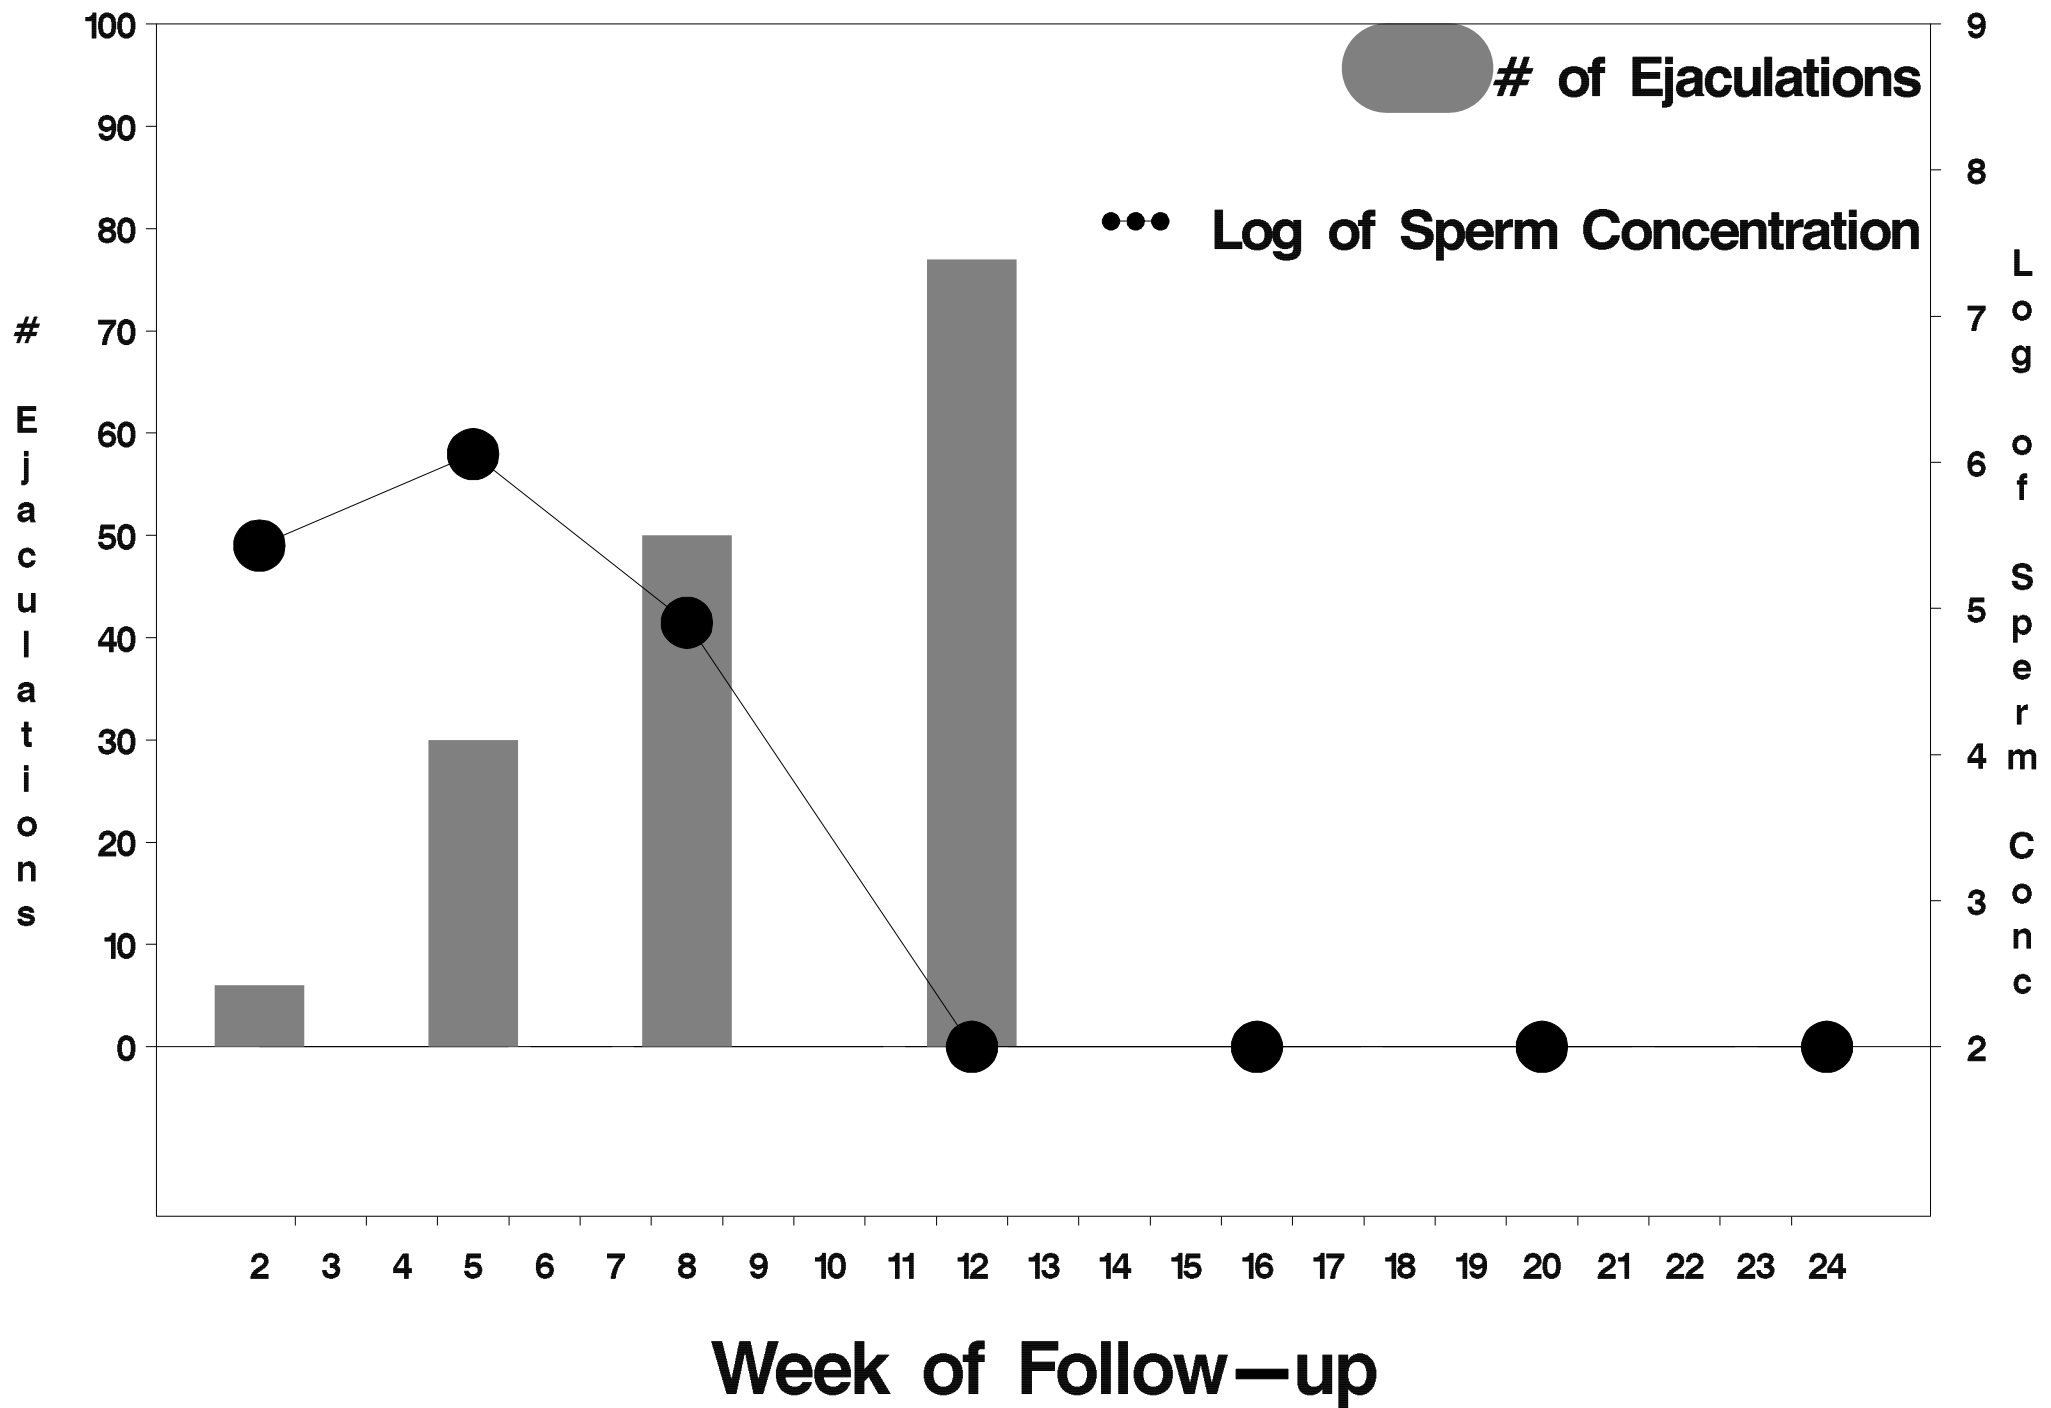

# Participant number= 148

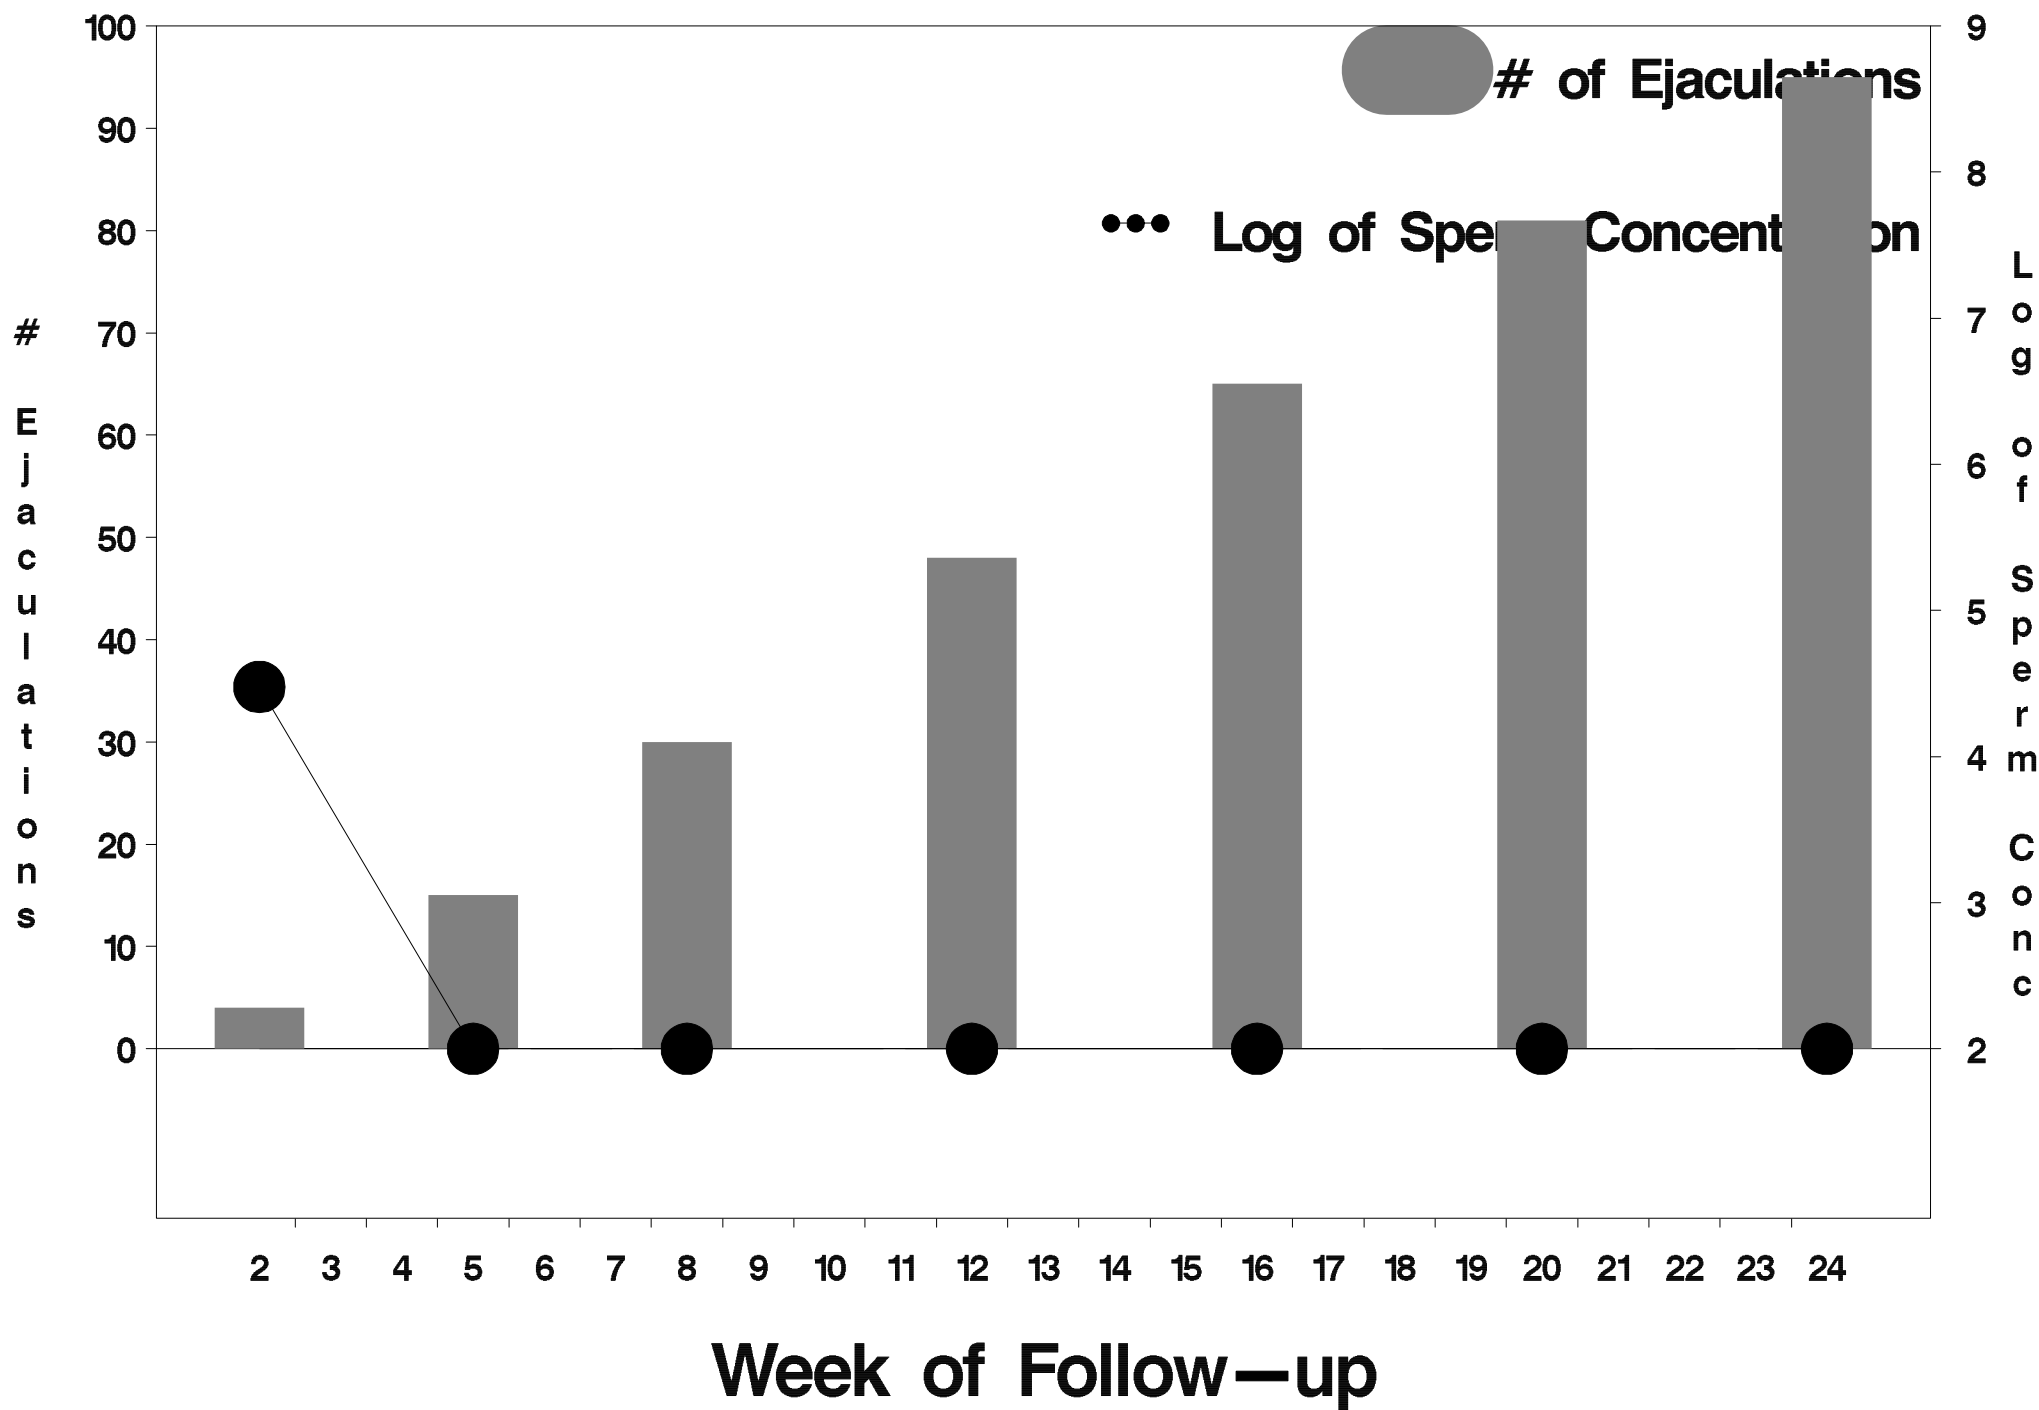



# Participant number= 149

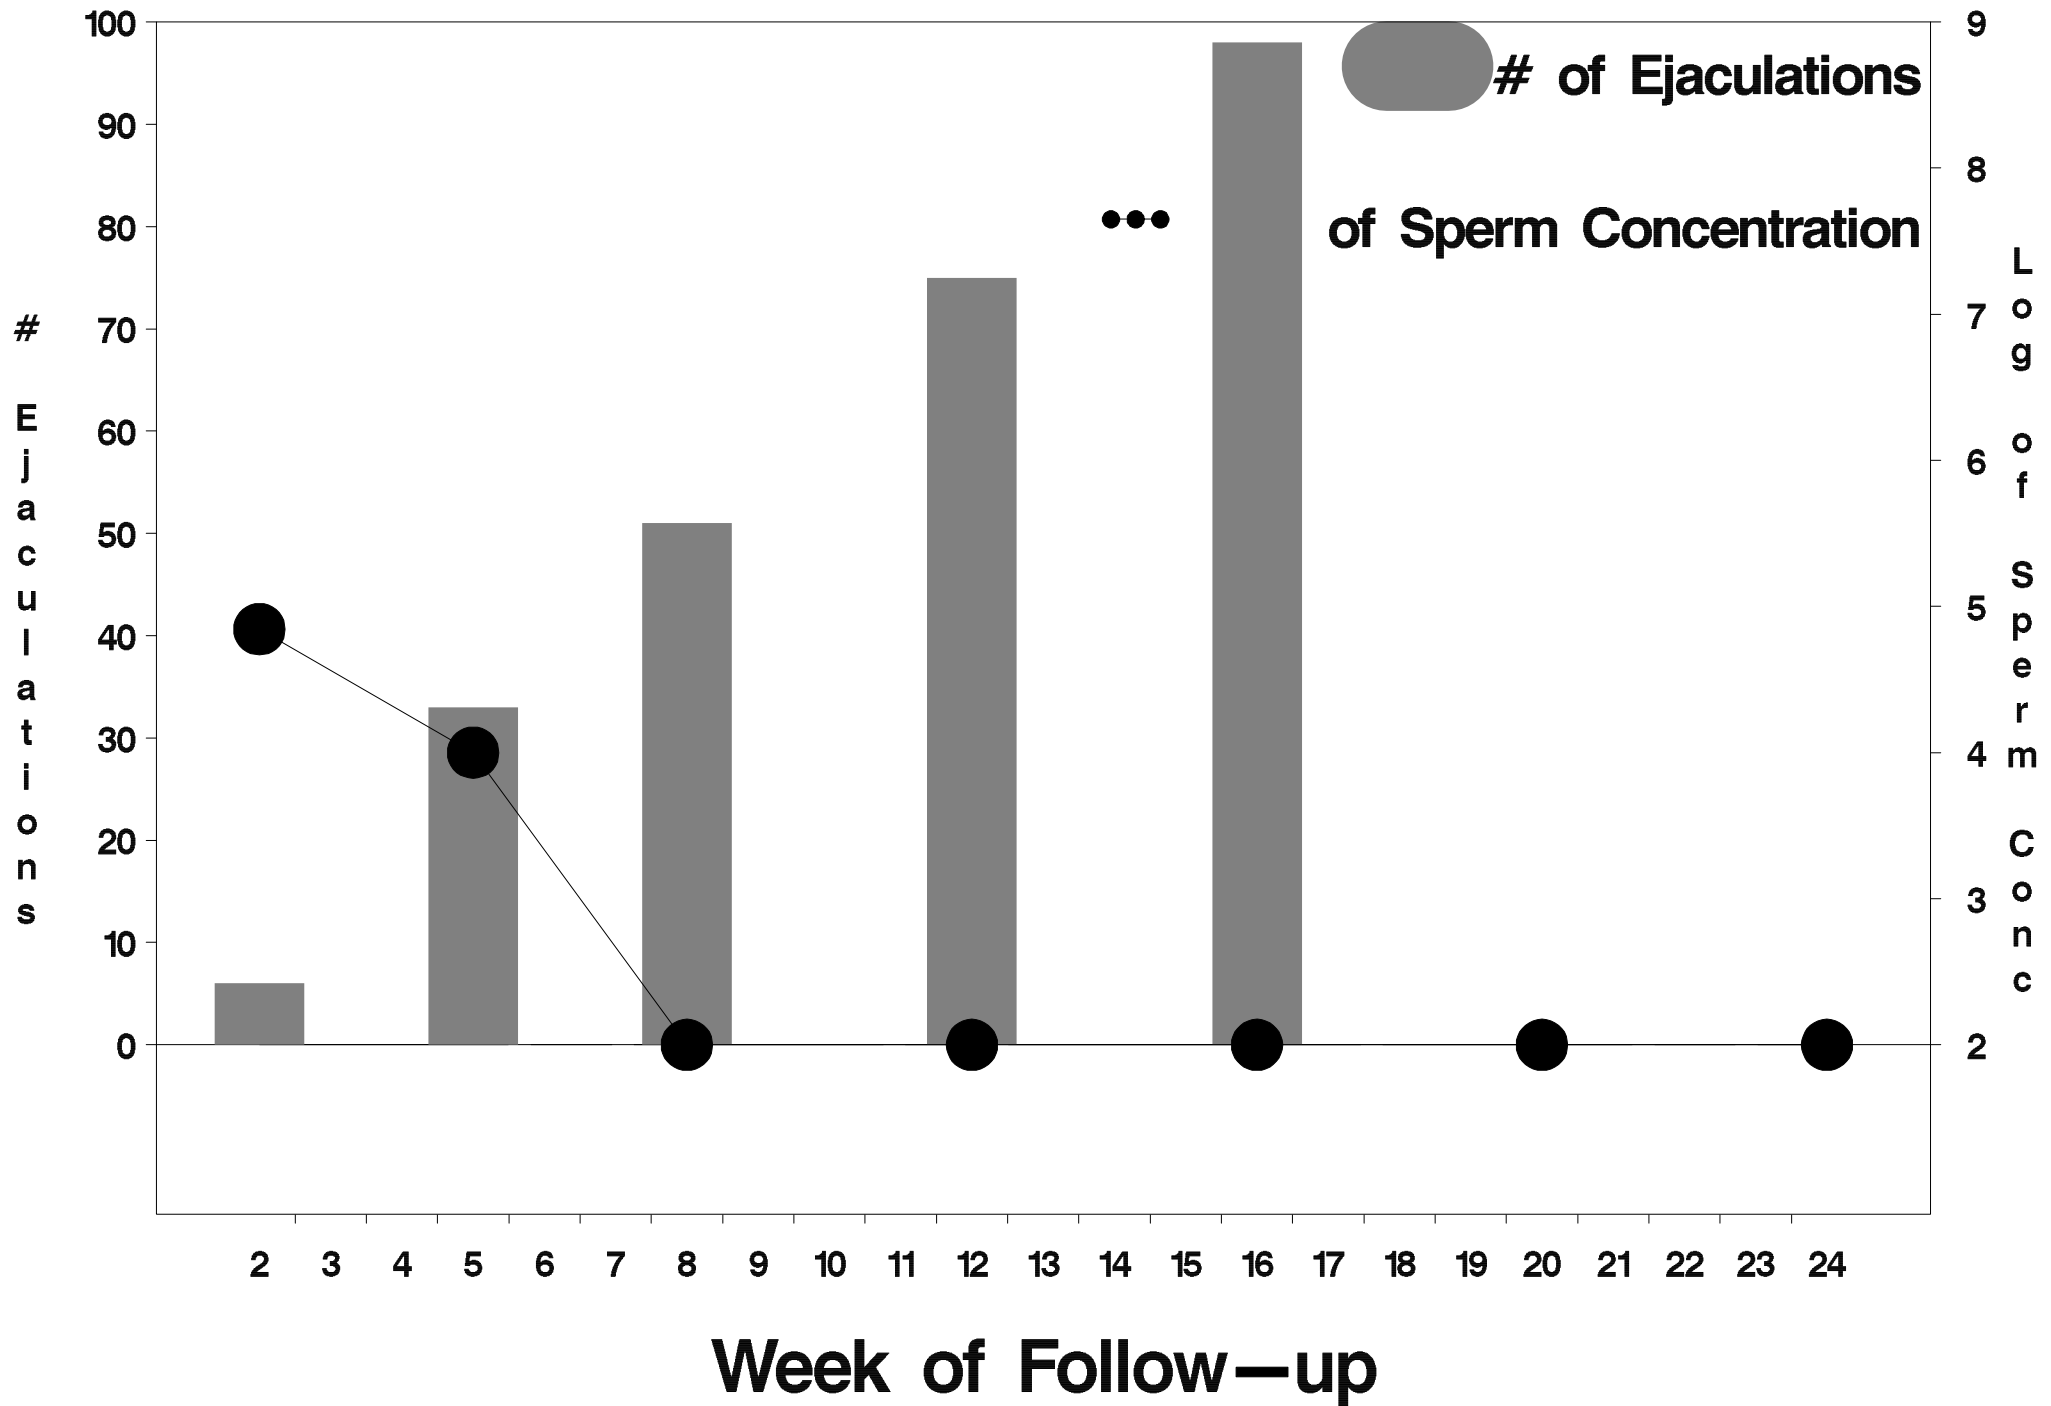

# Participant number= 150

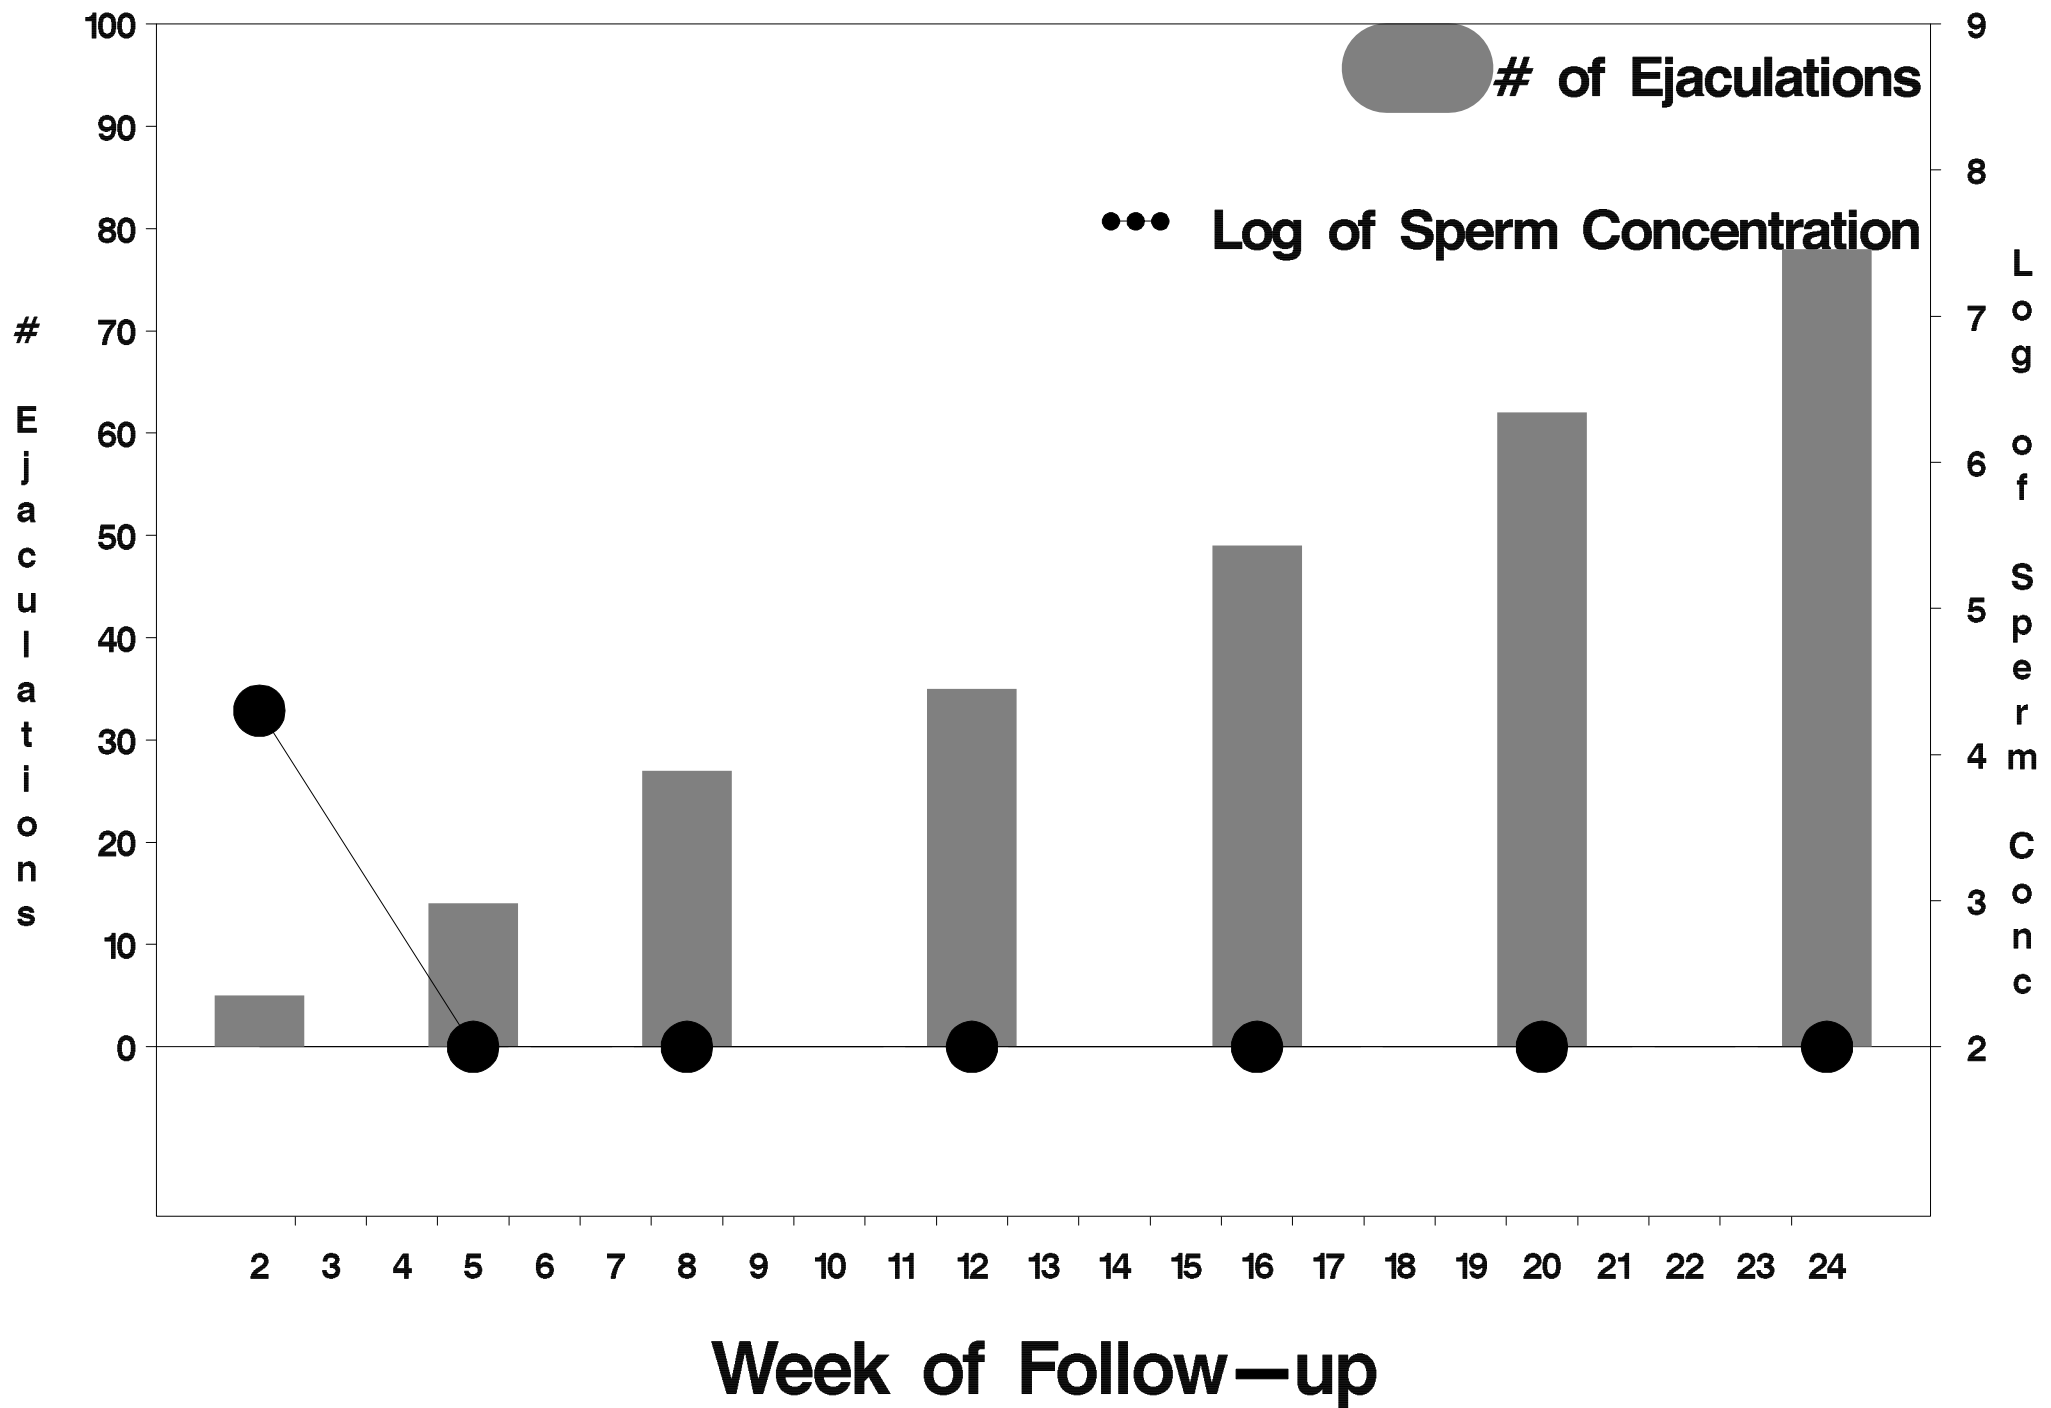

# Participant number= 151

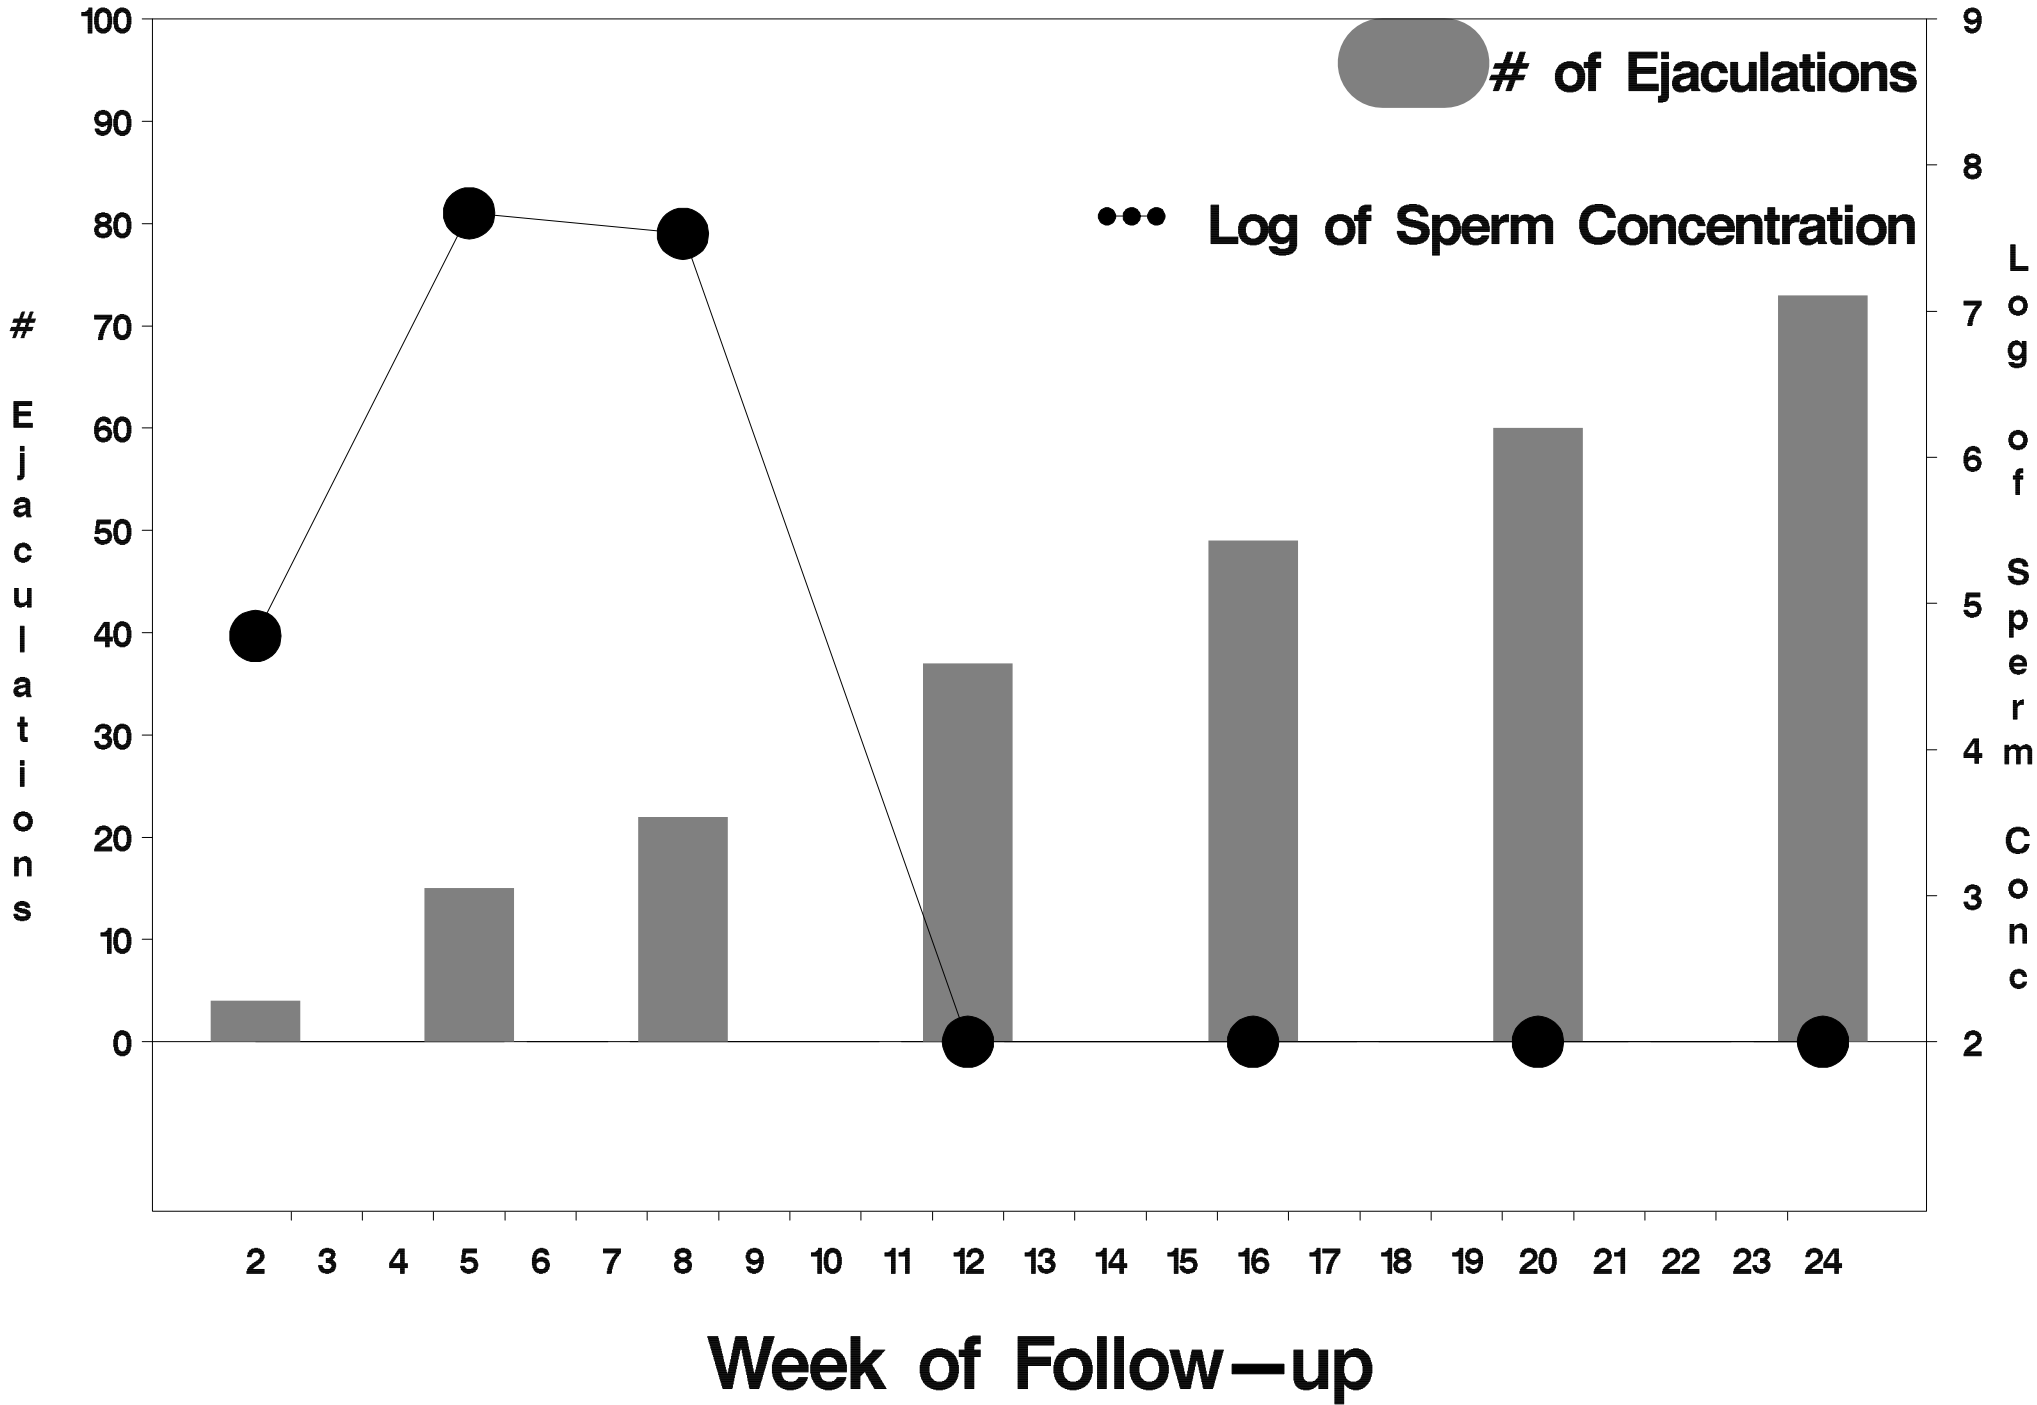

# Participant number= 152

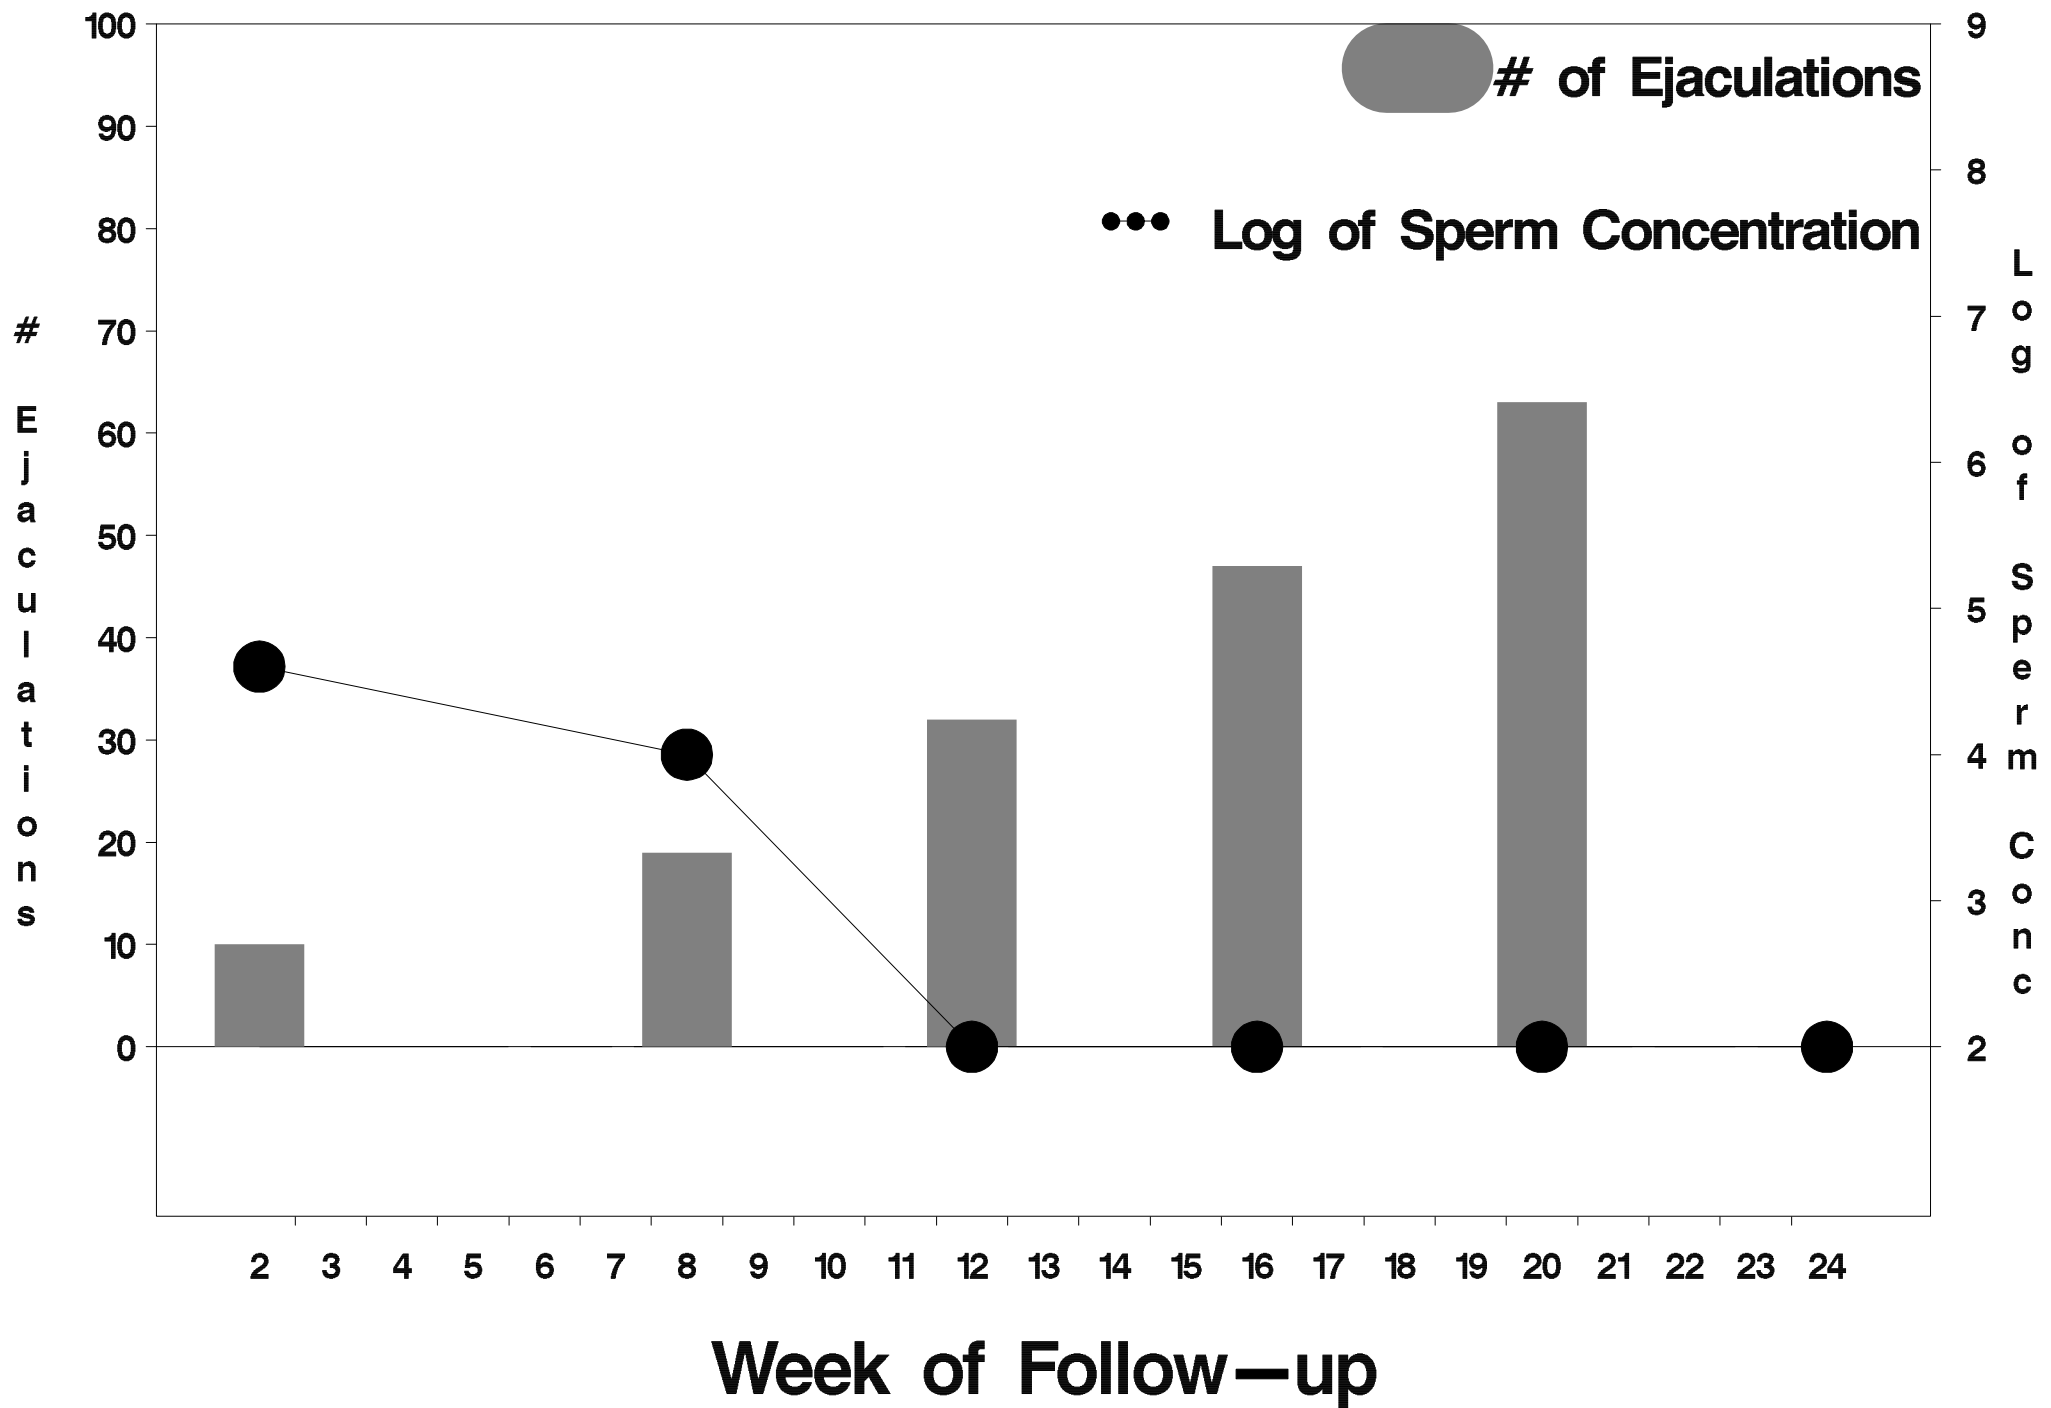

# Participant number= 153

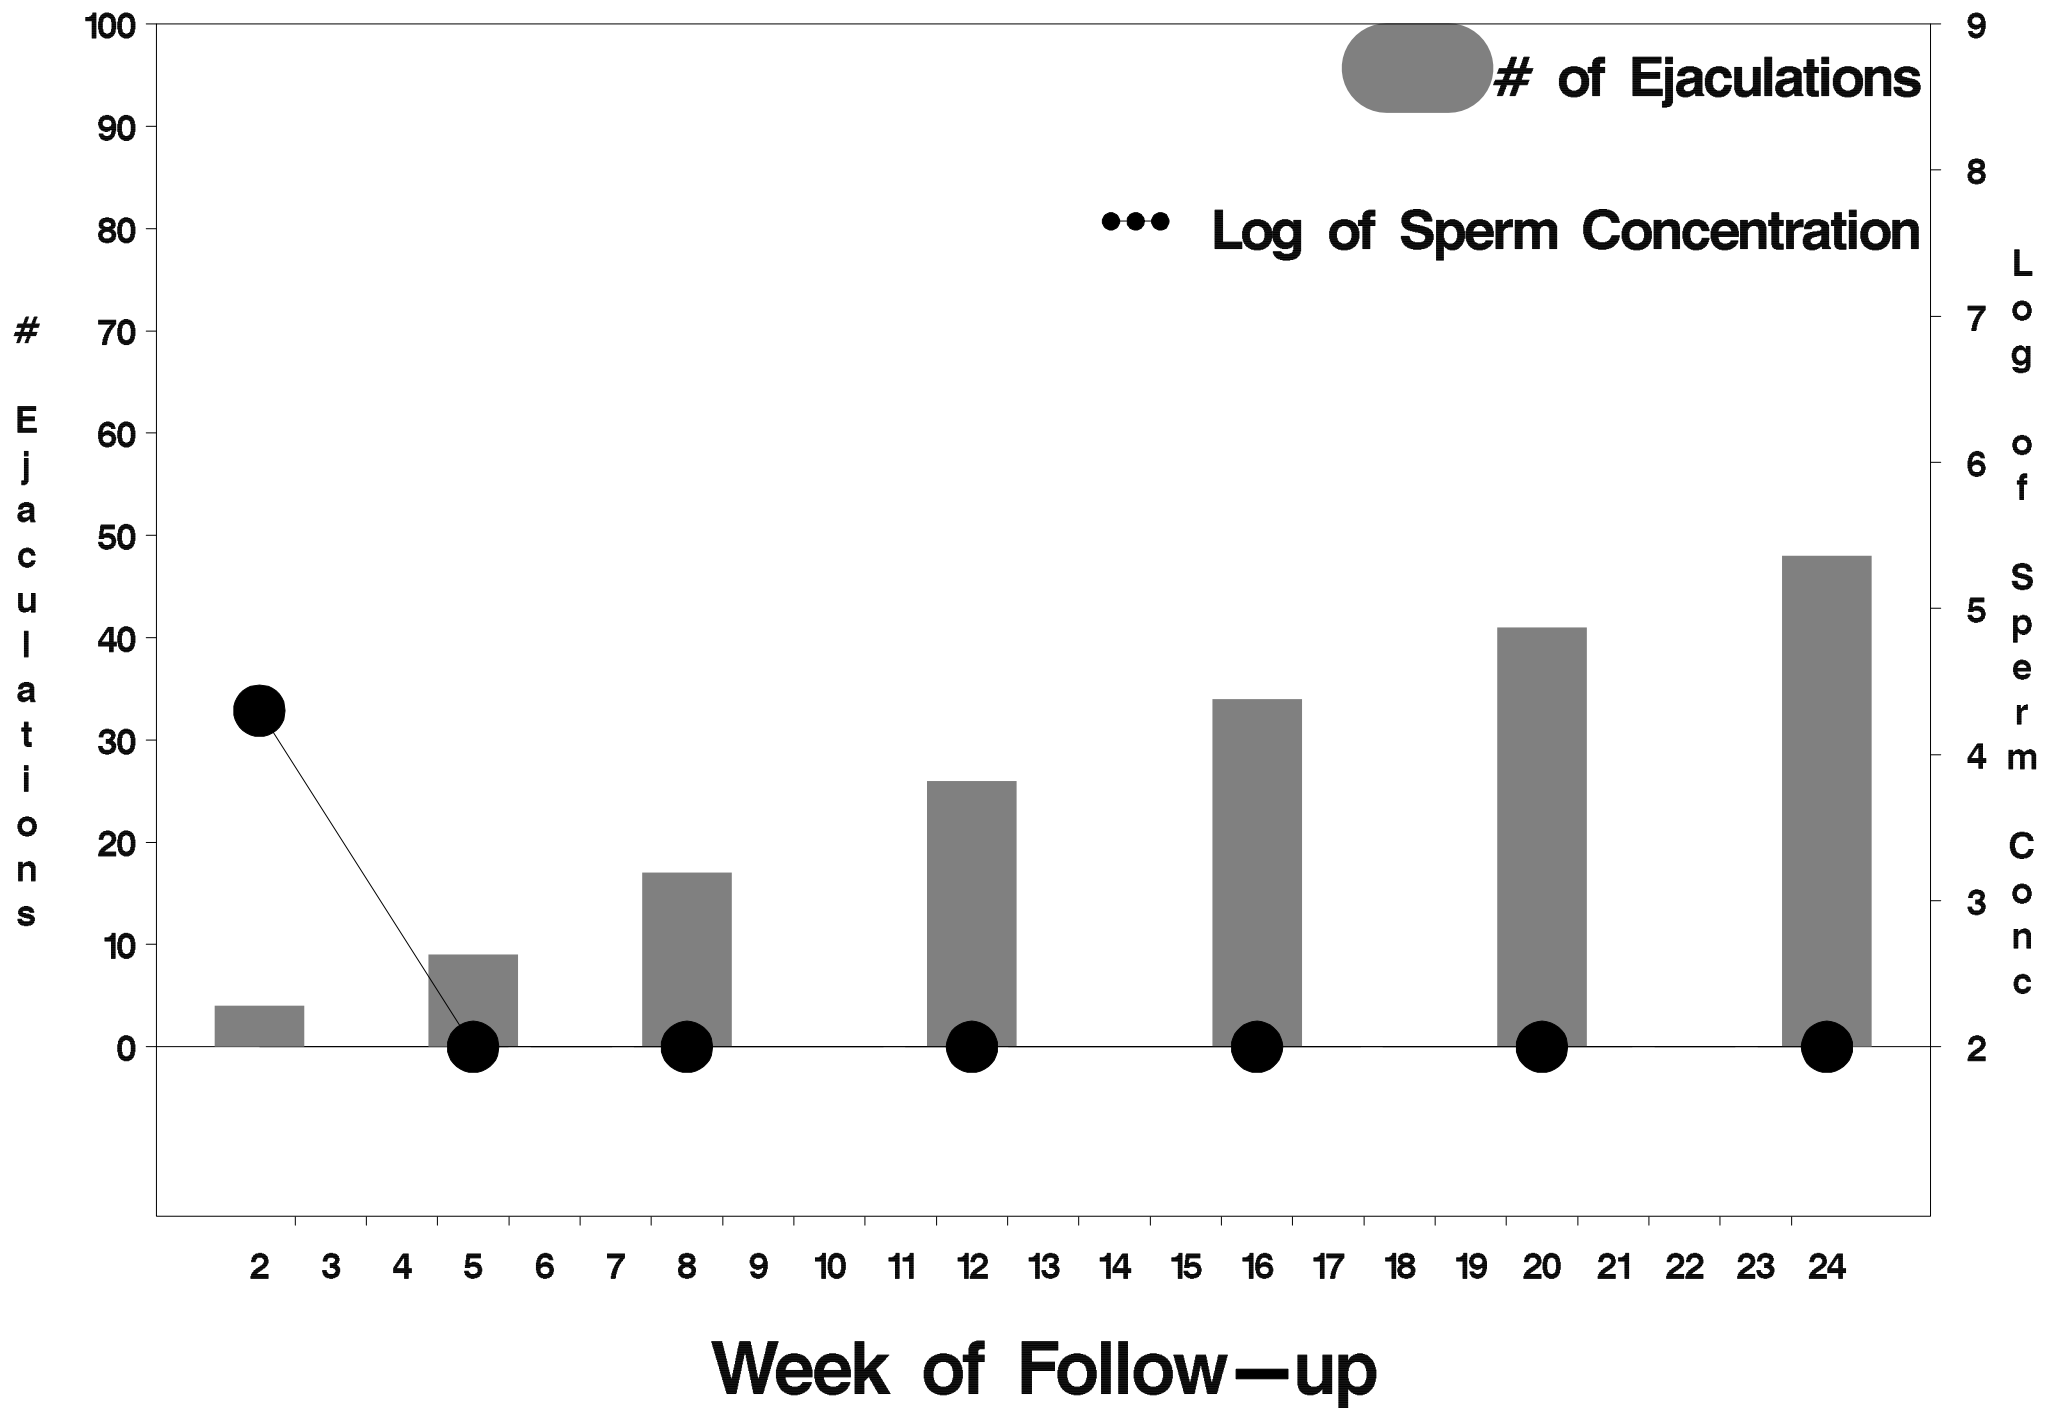

# Participant number= 154

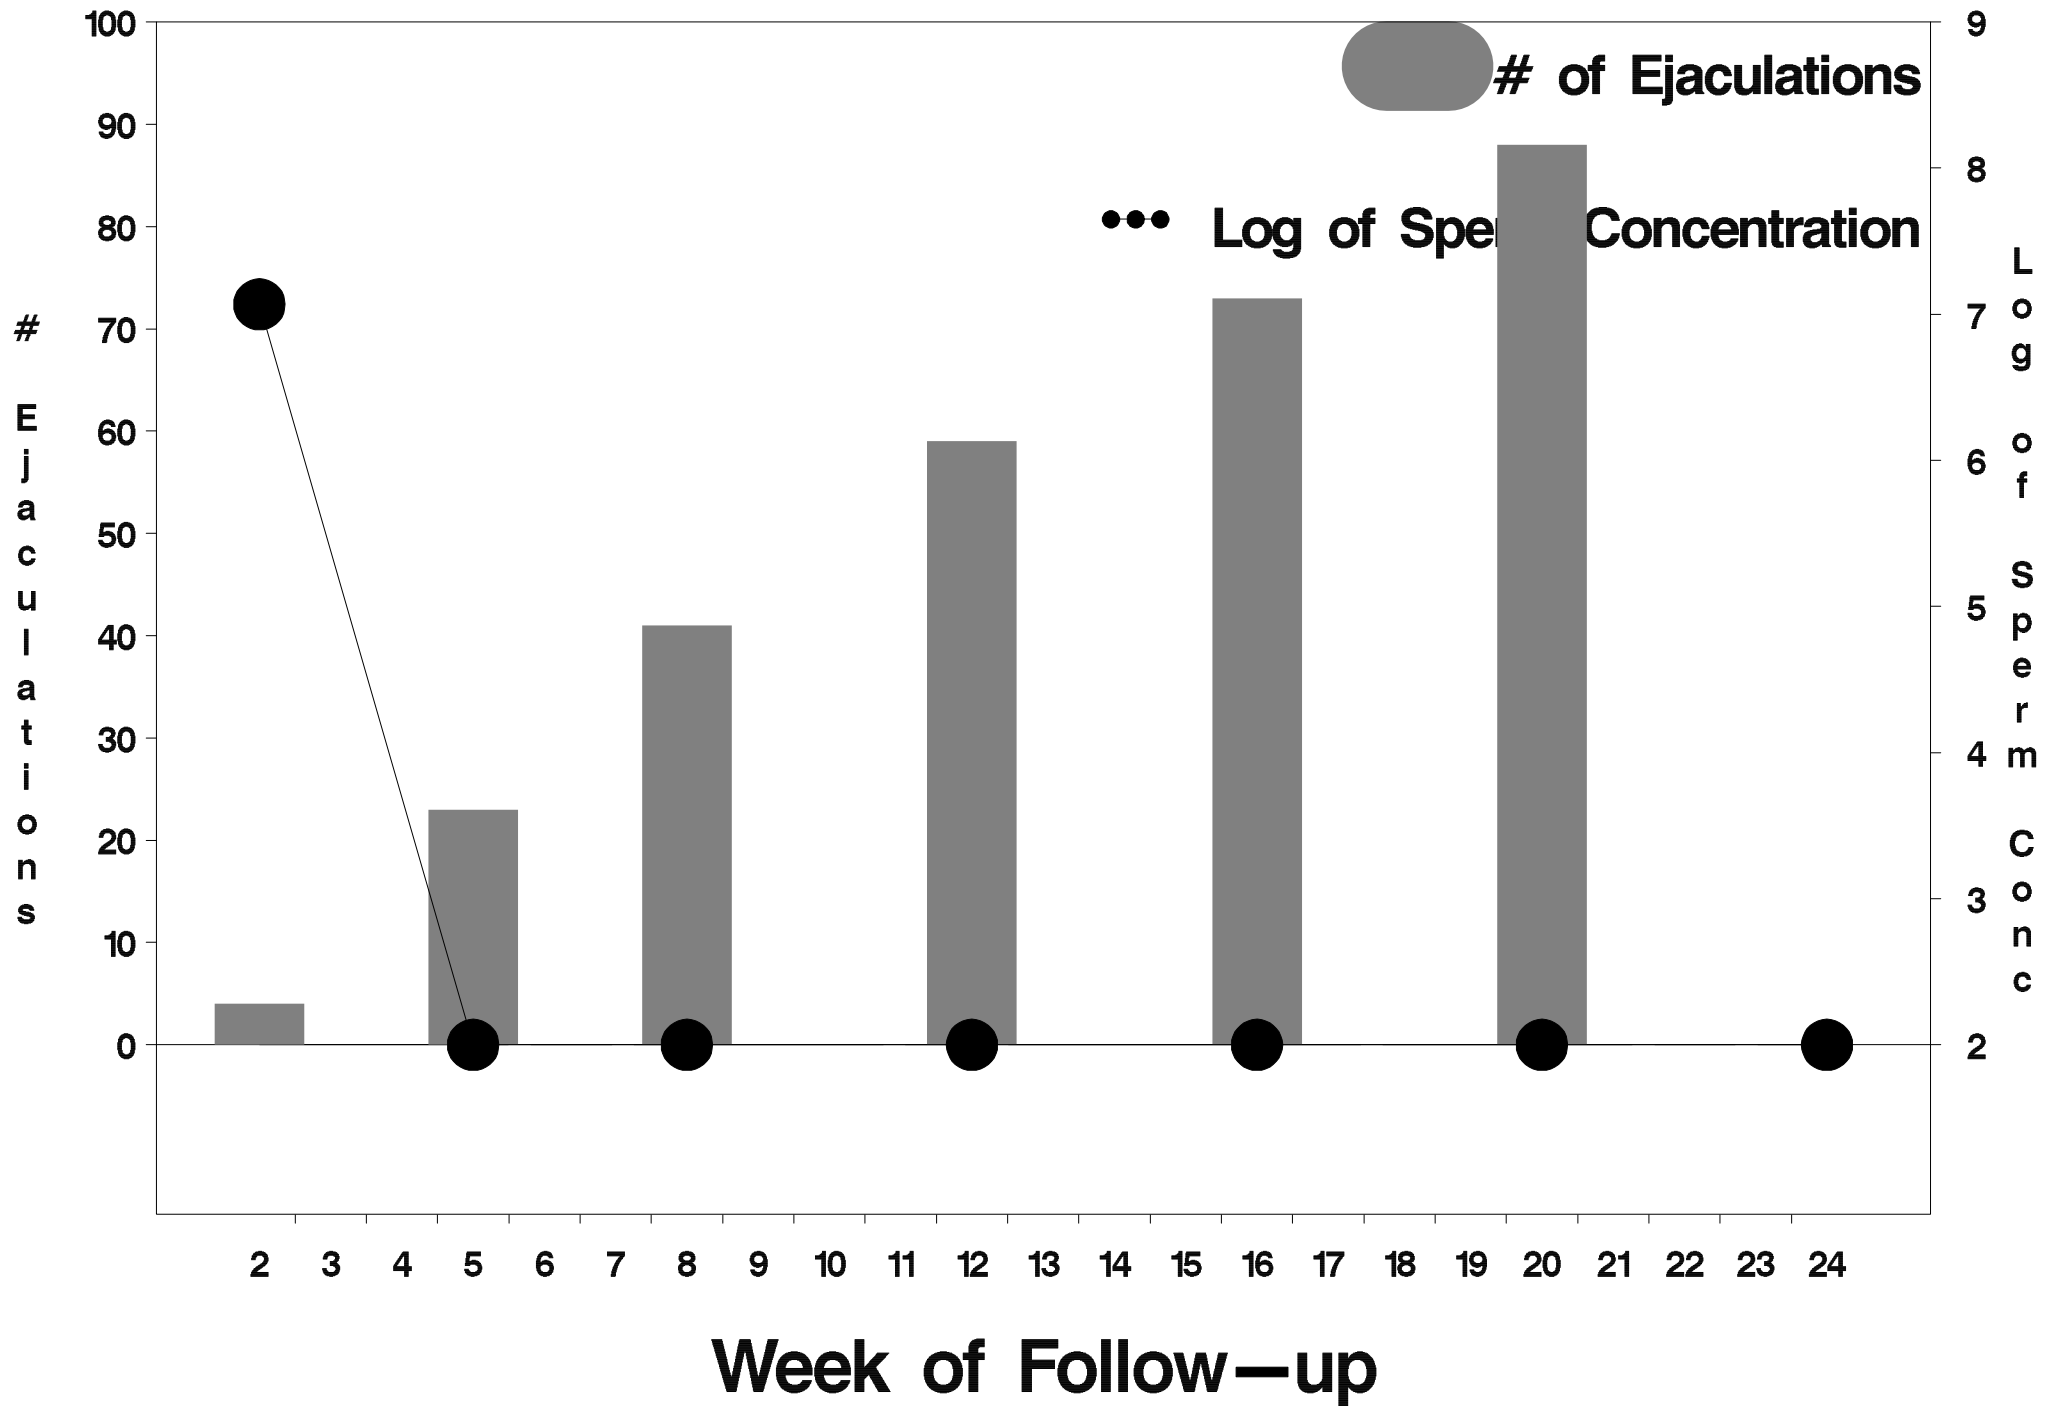

# Participant number= 155

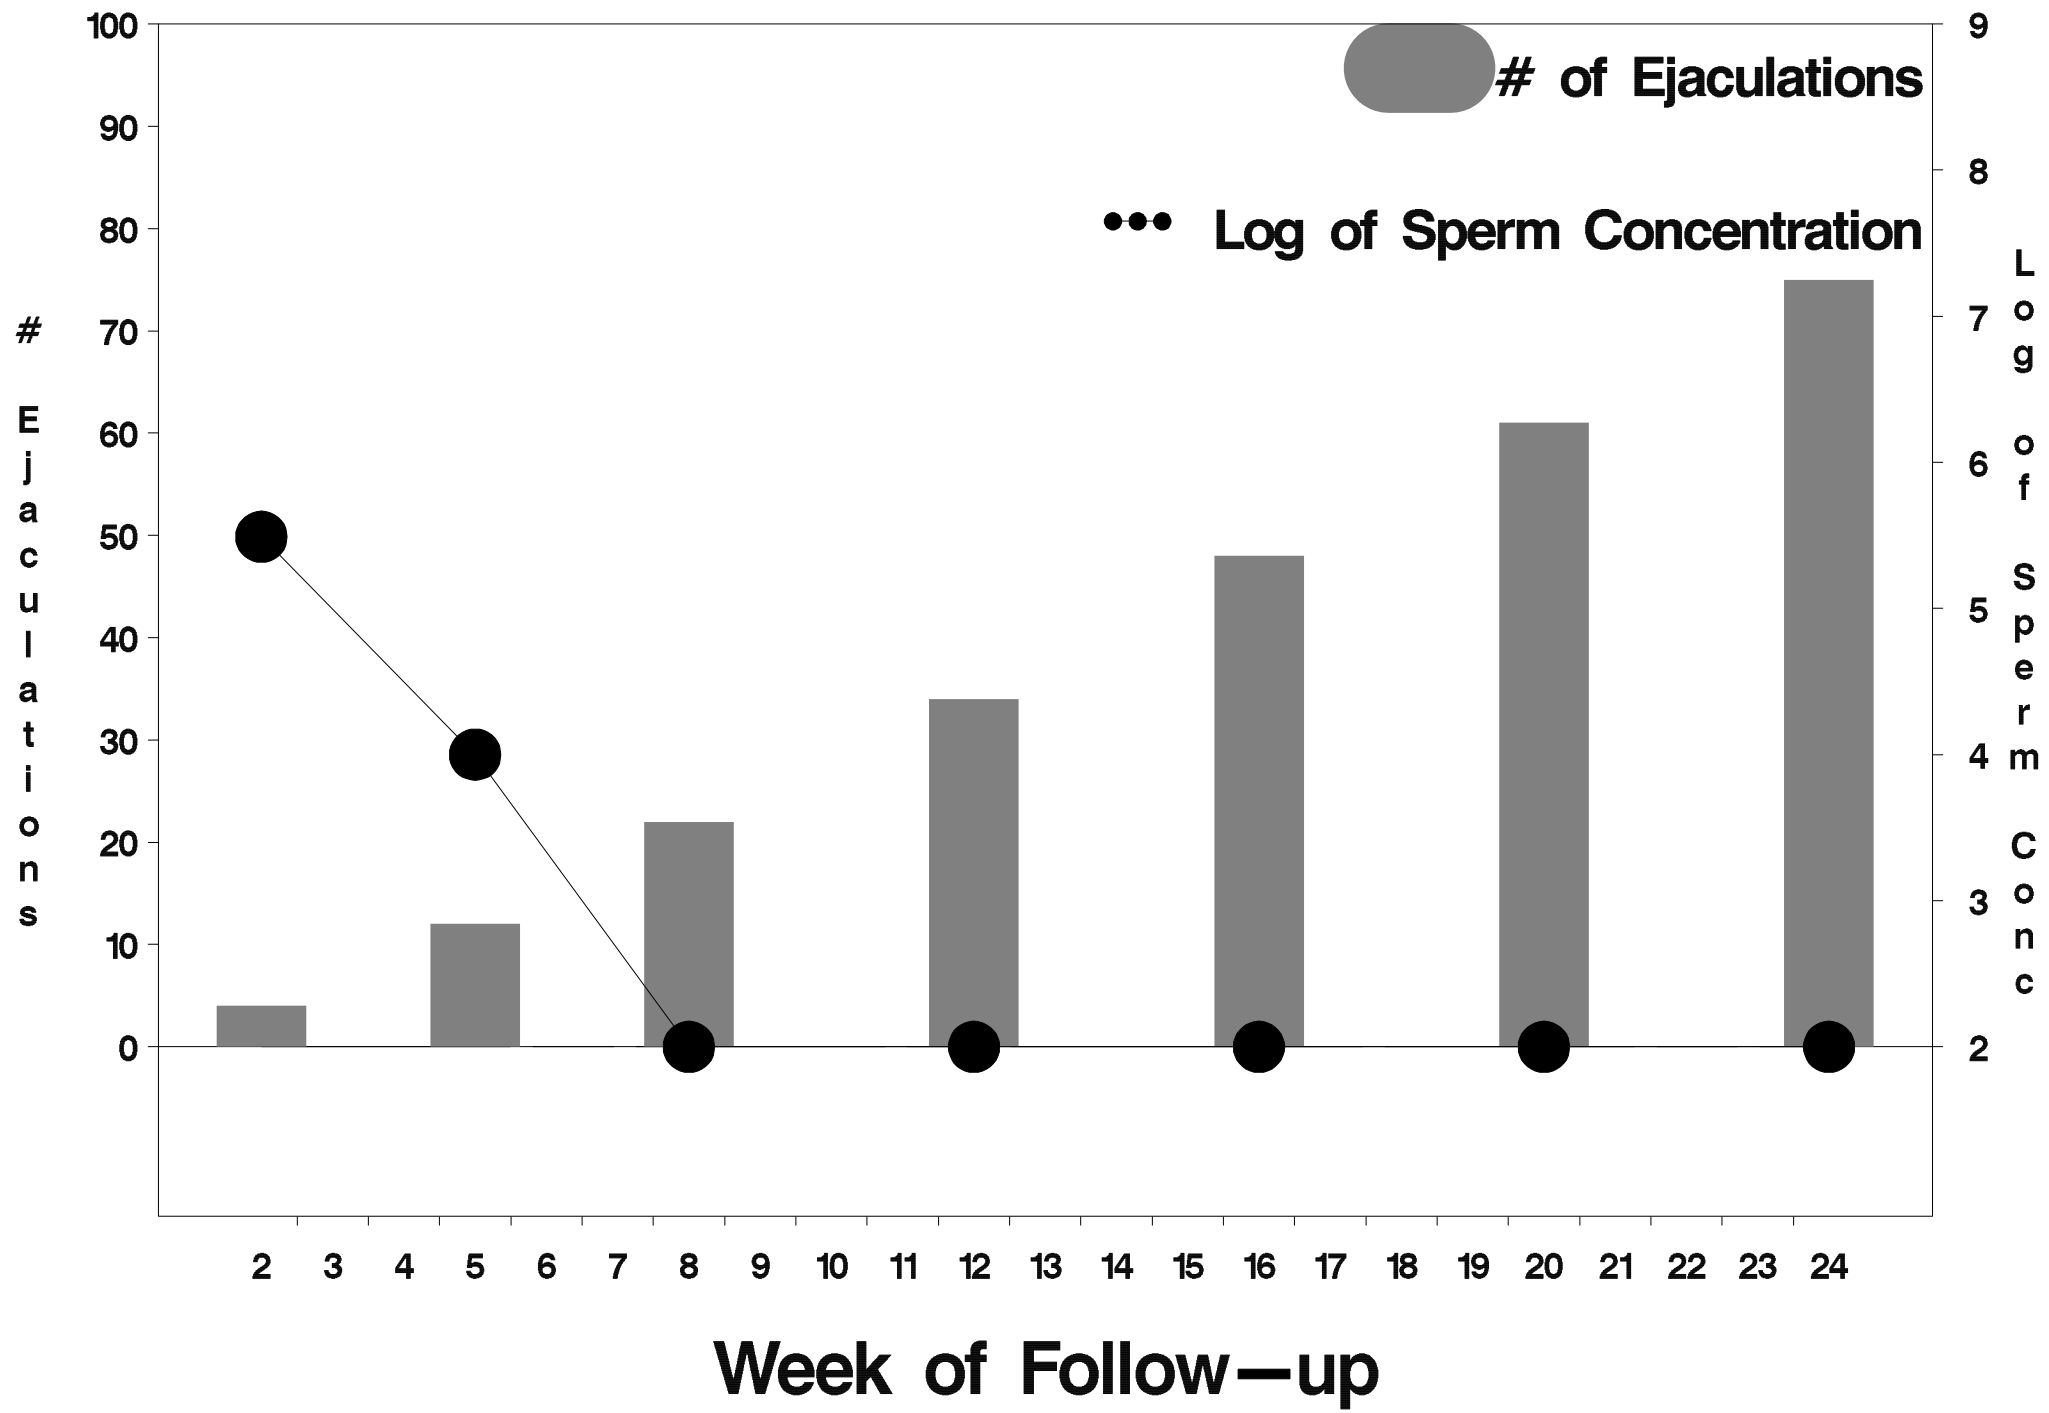

# Participant number= 156

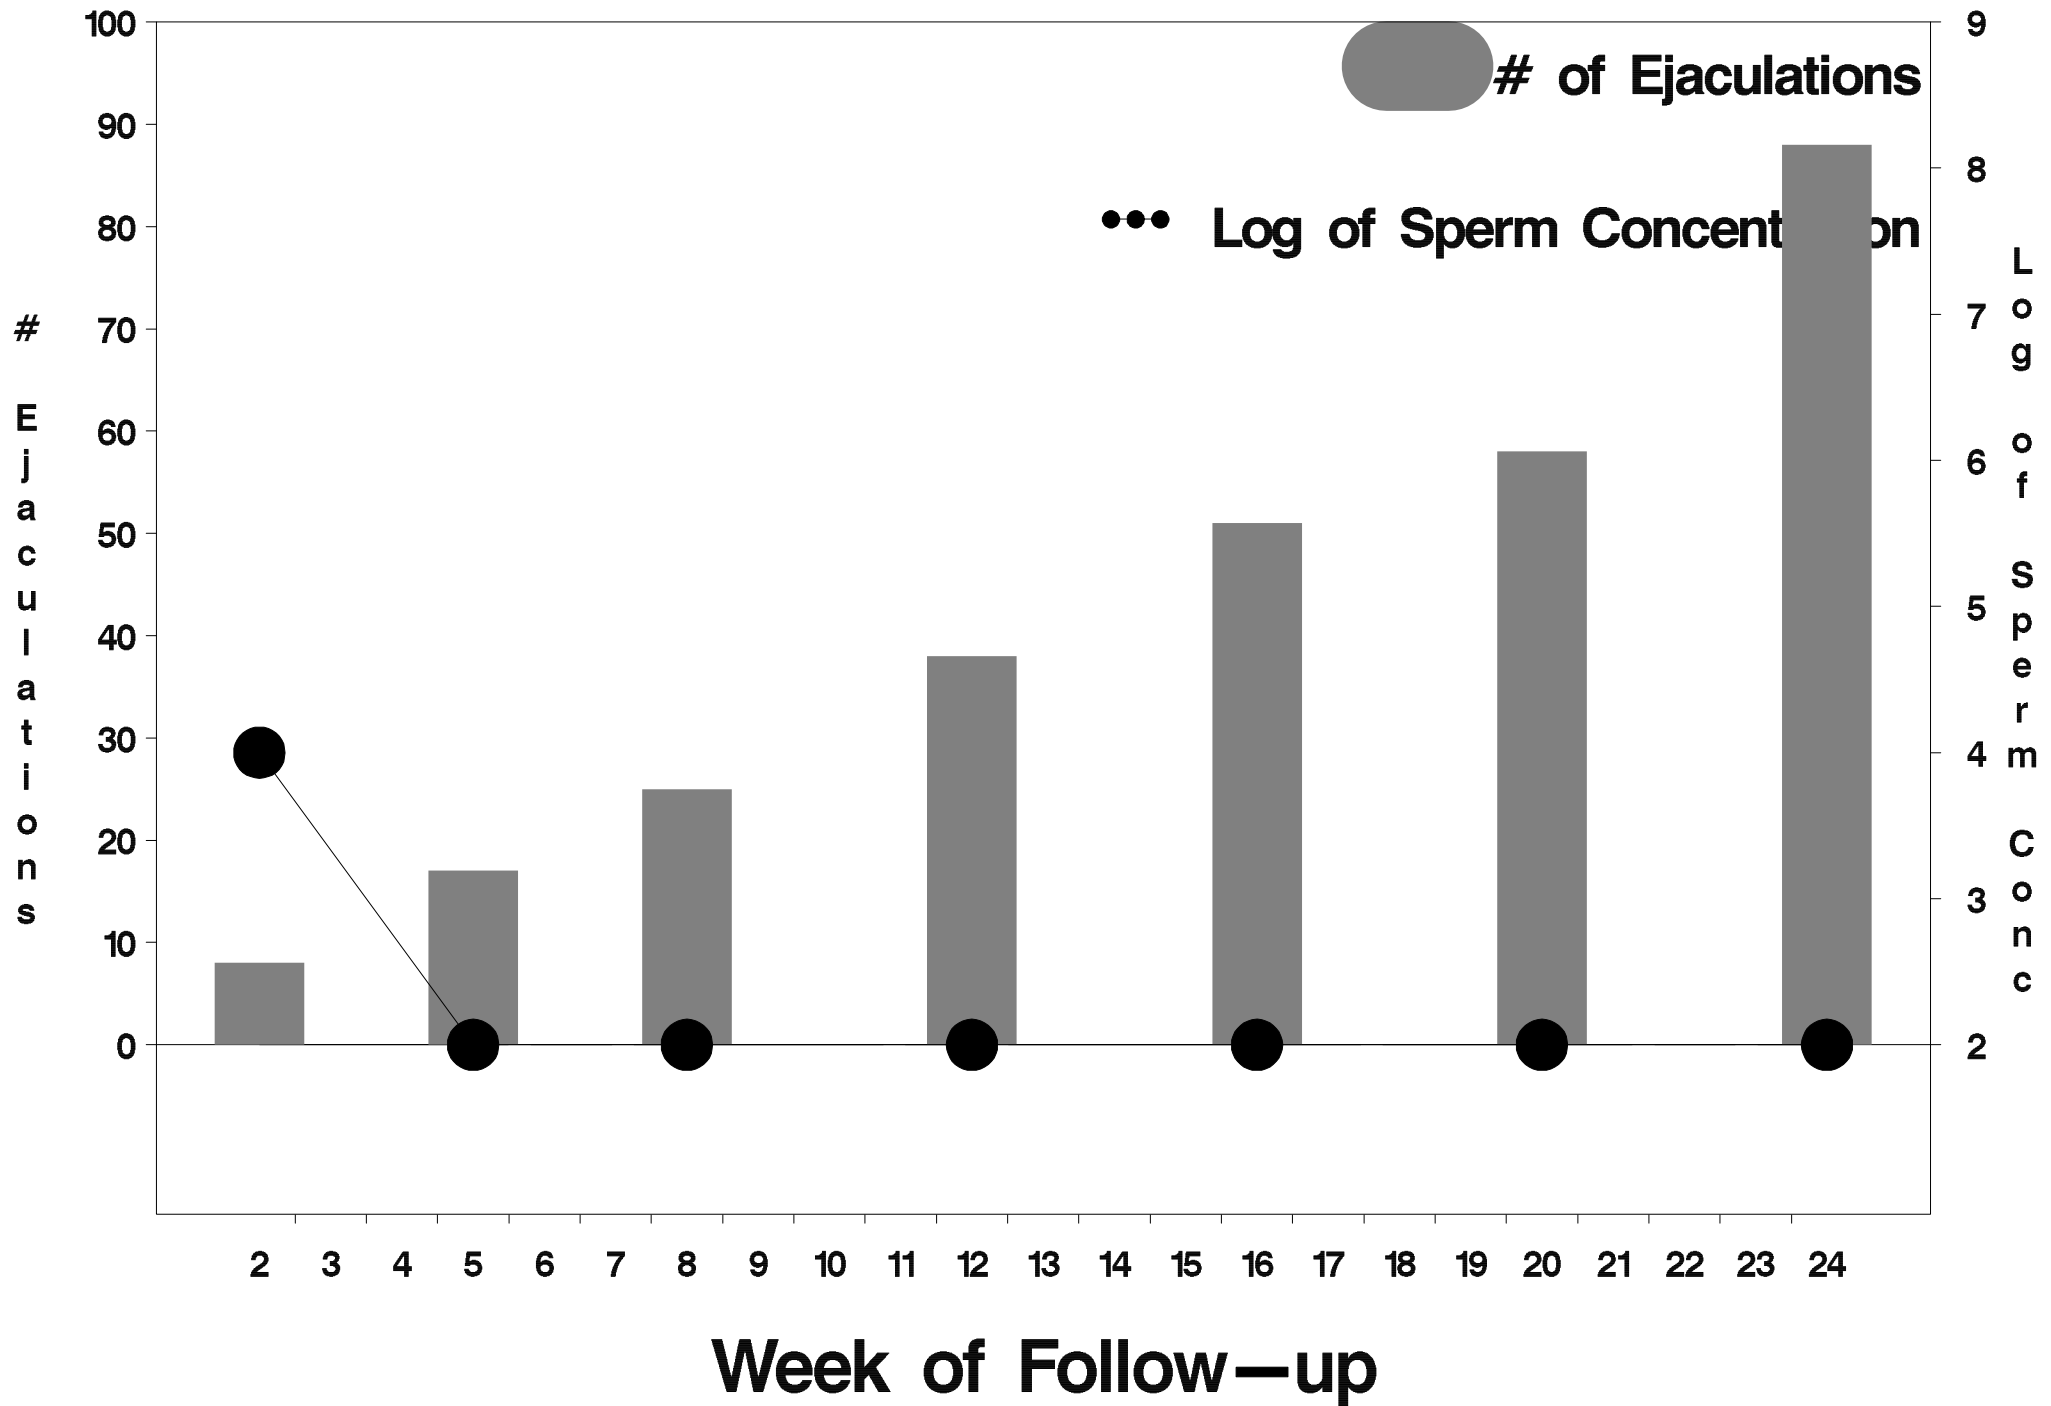



# Participant number= 157

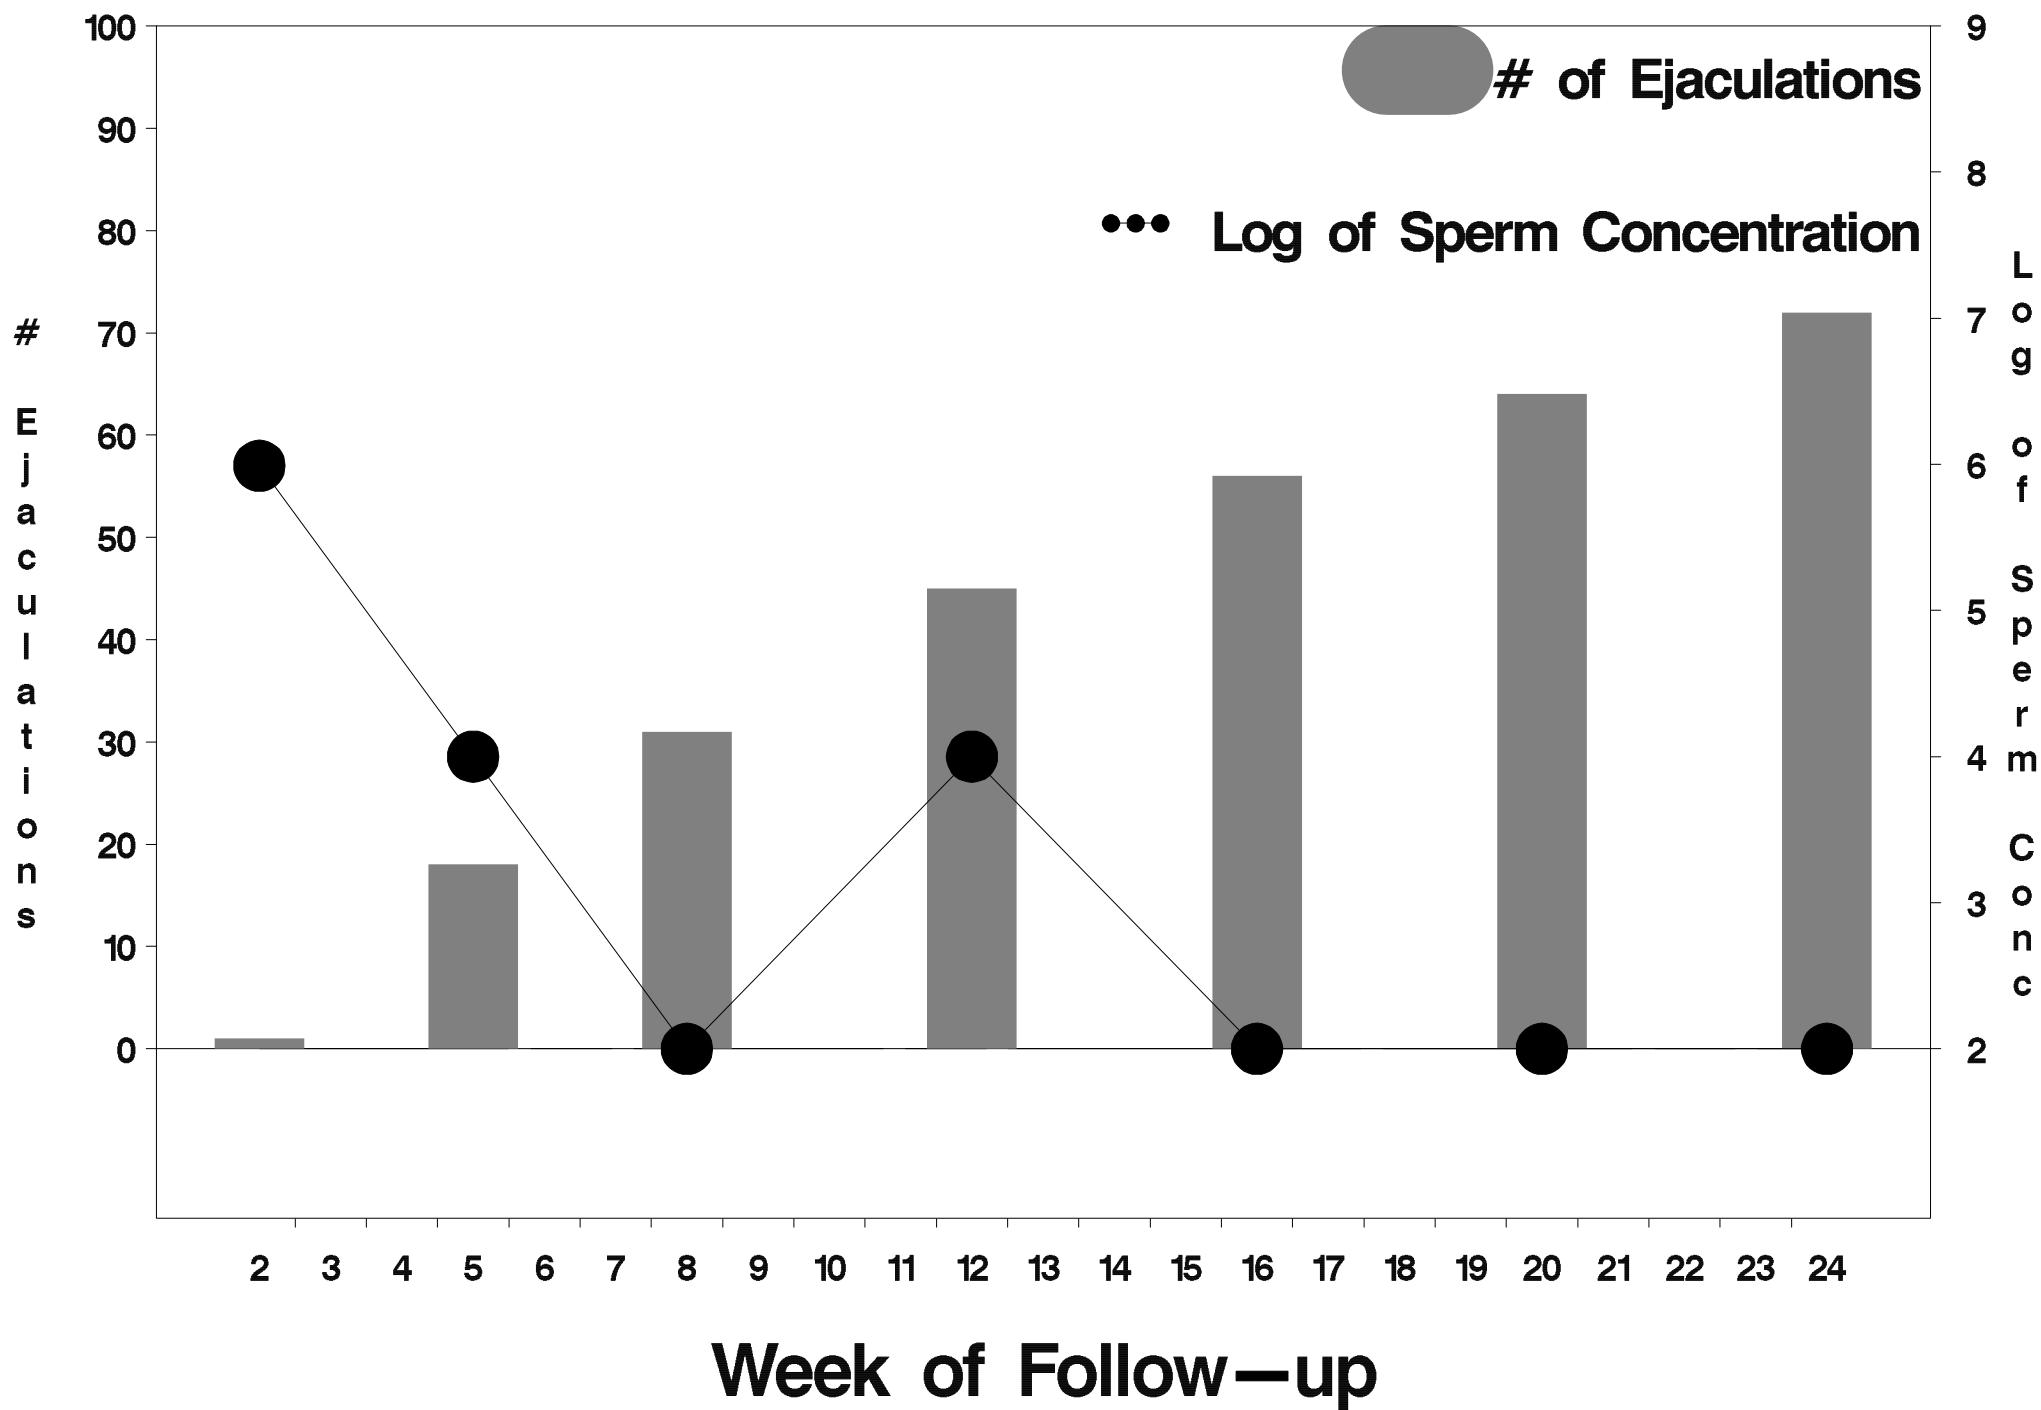

# Participant number= 158

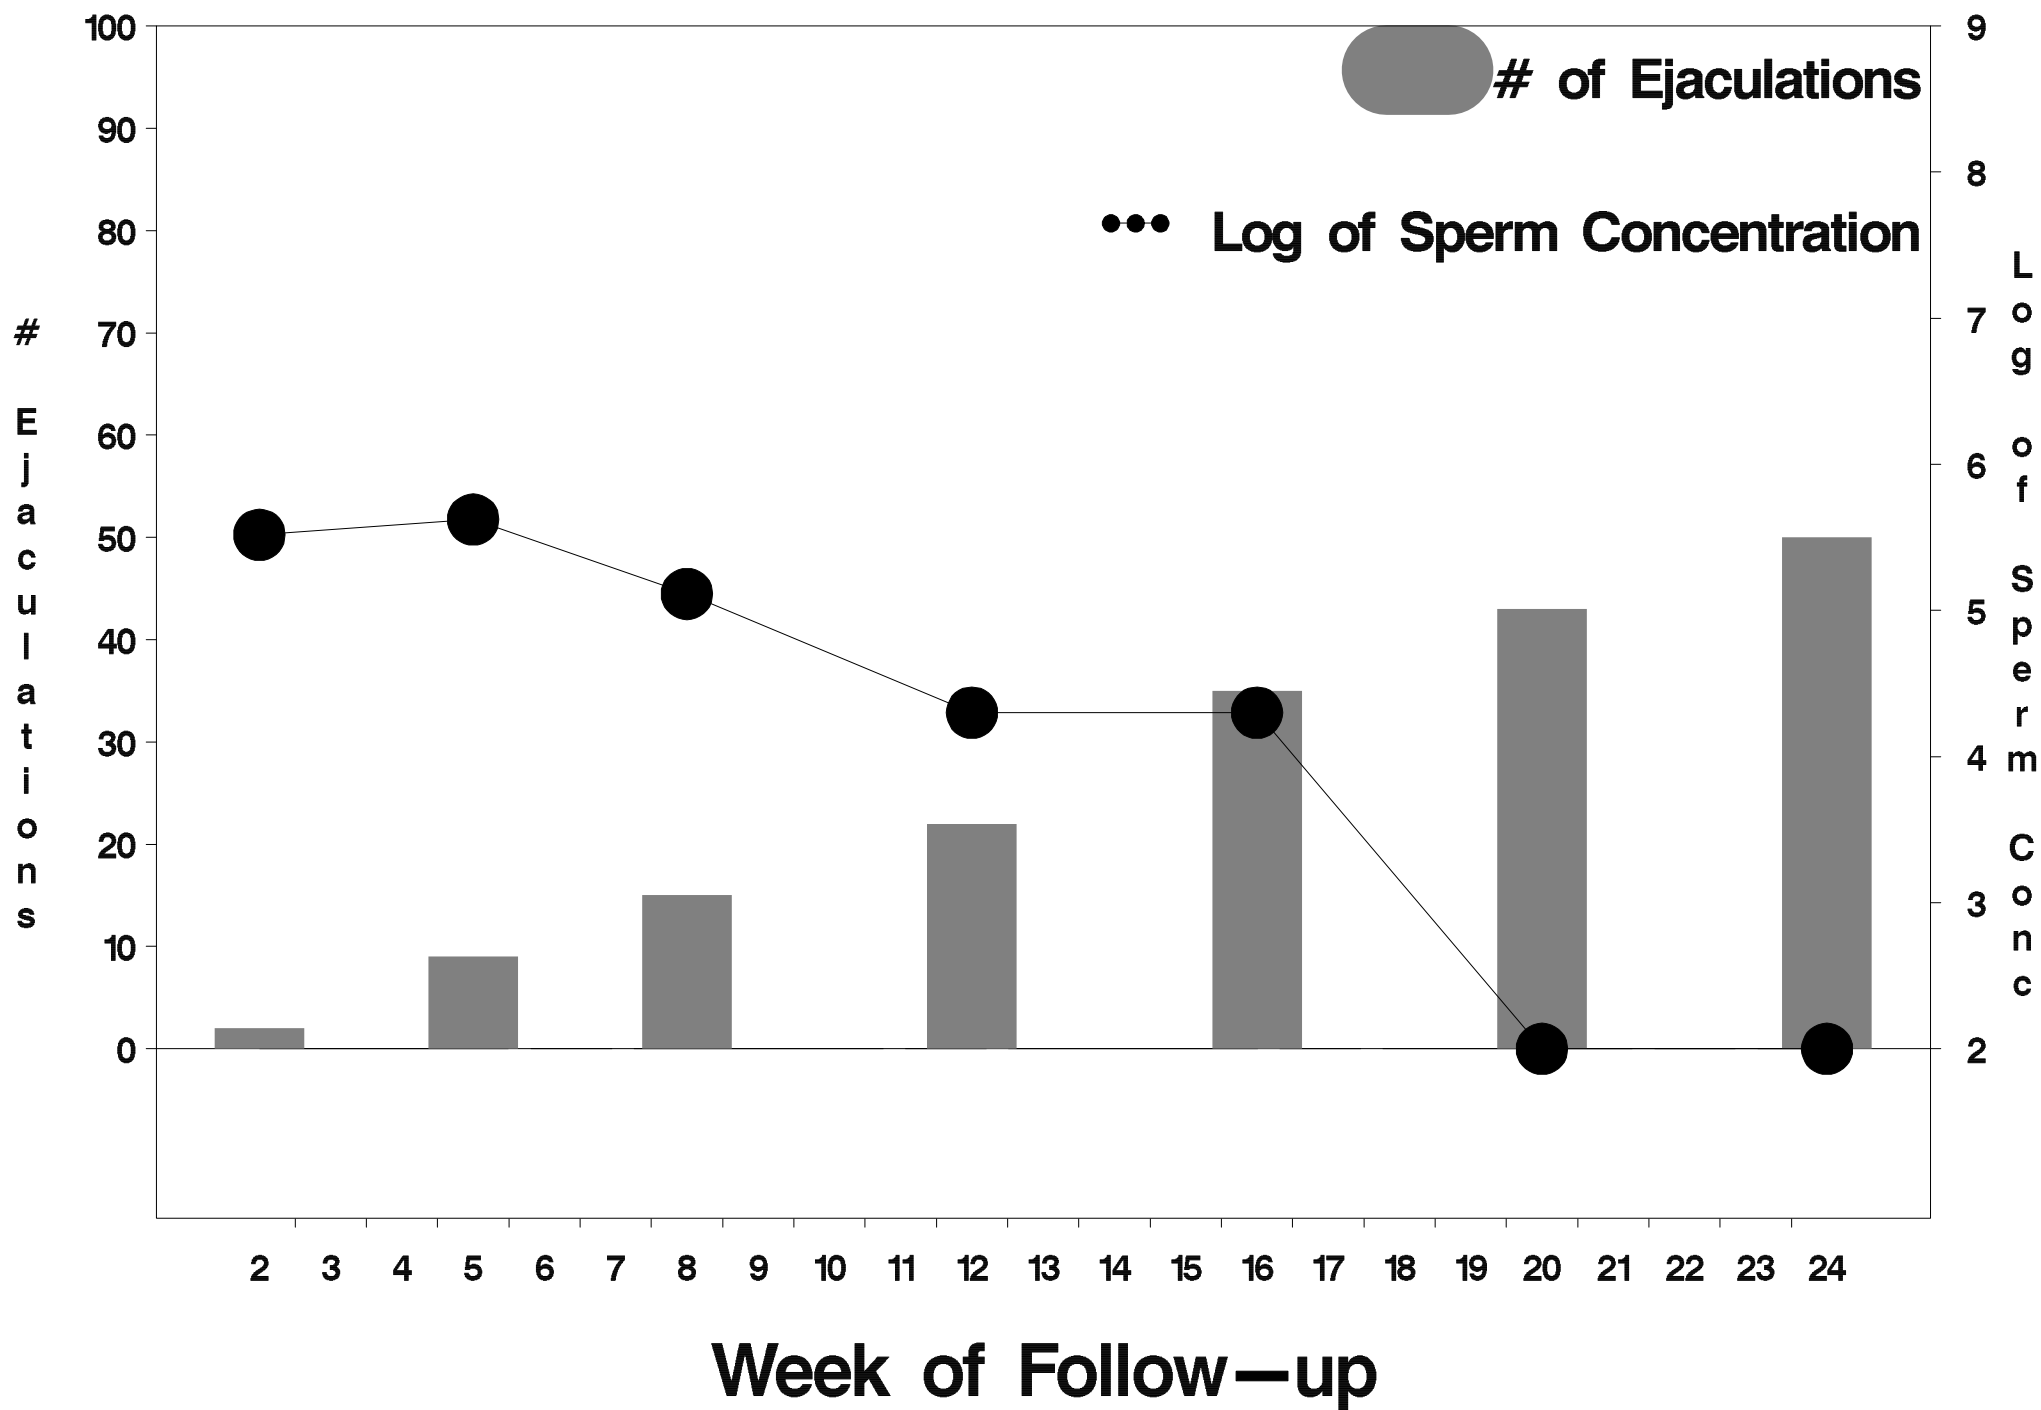

# Participant number= 159

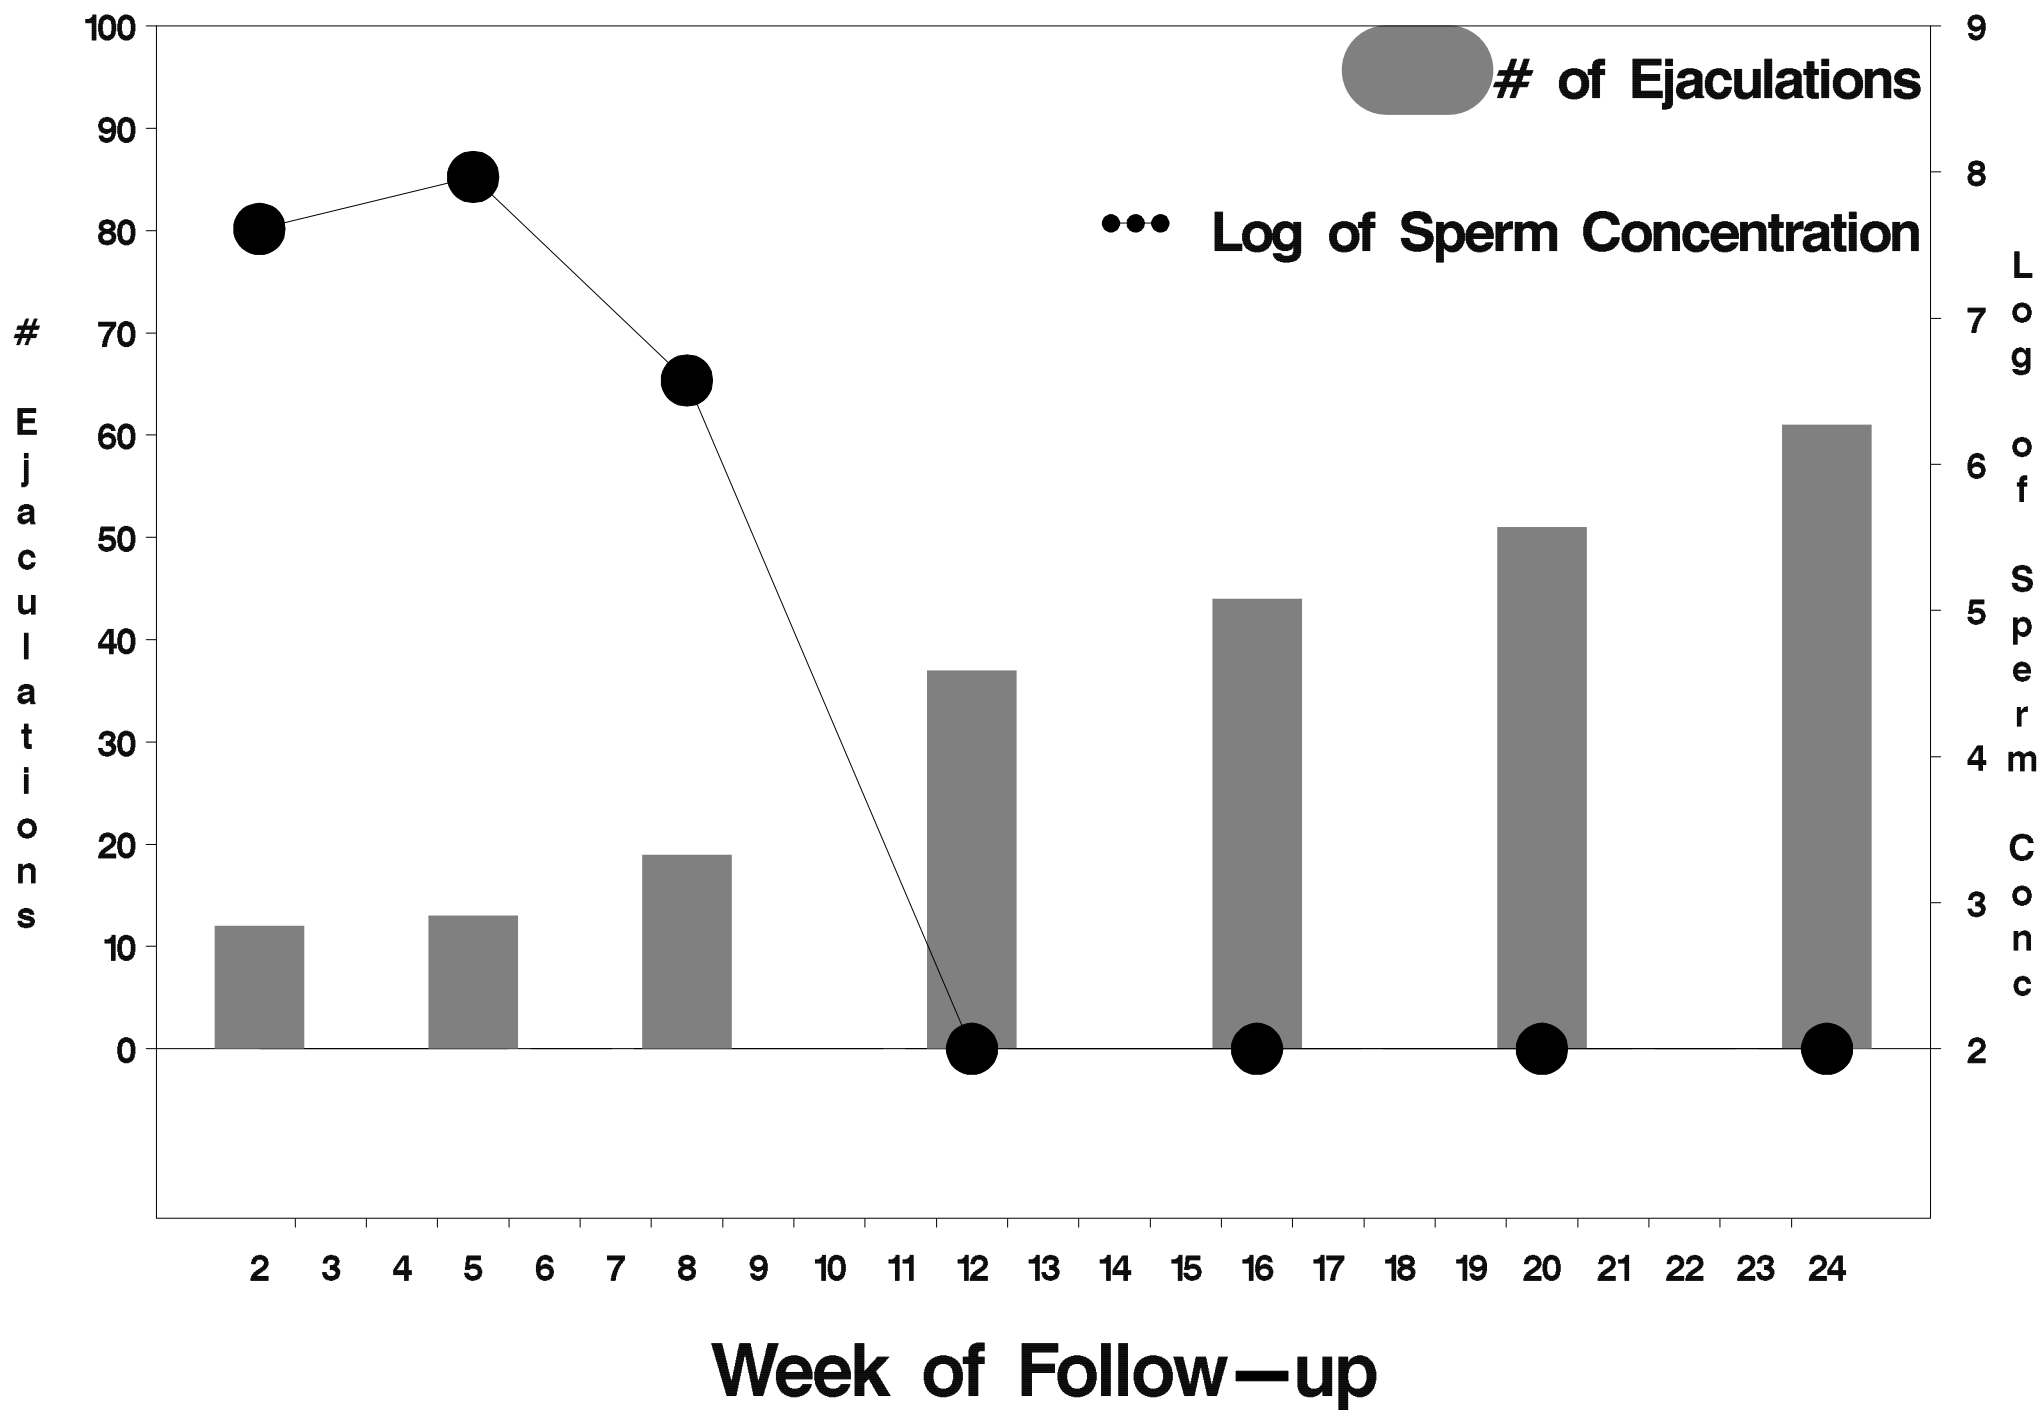

# Participant number= 160

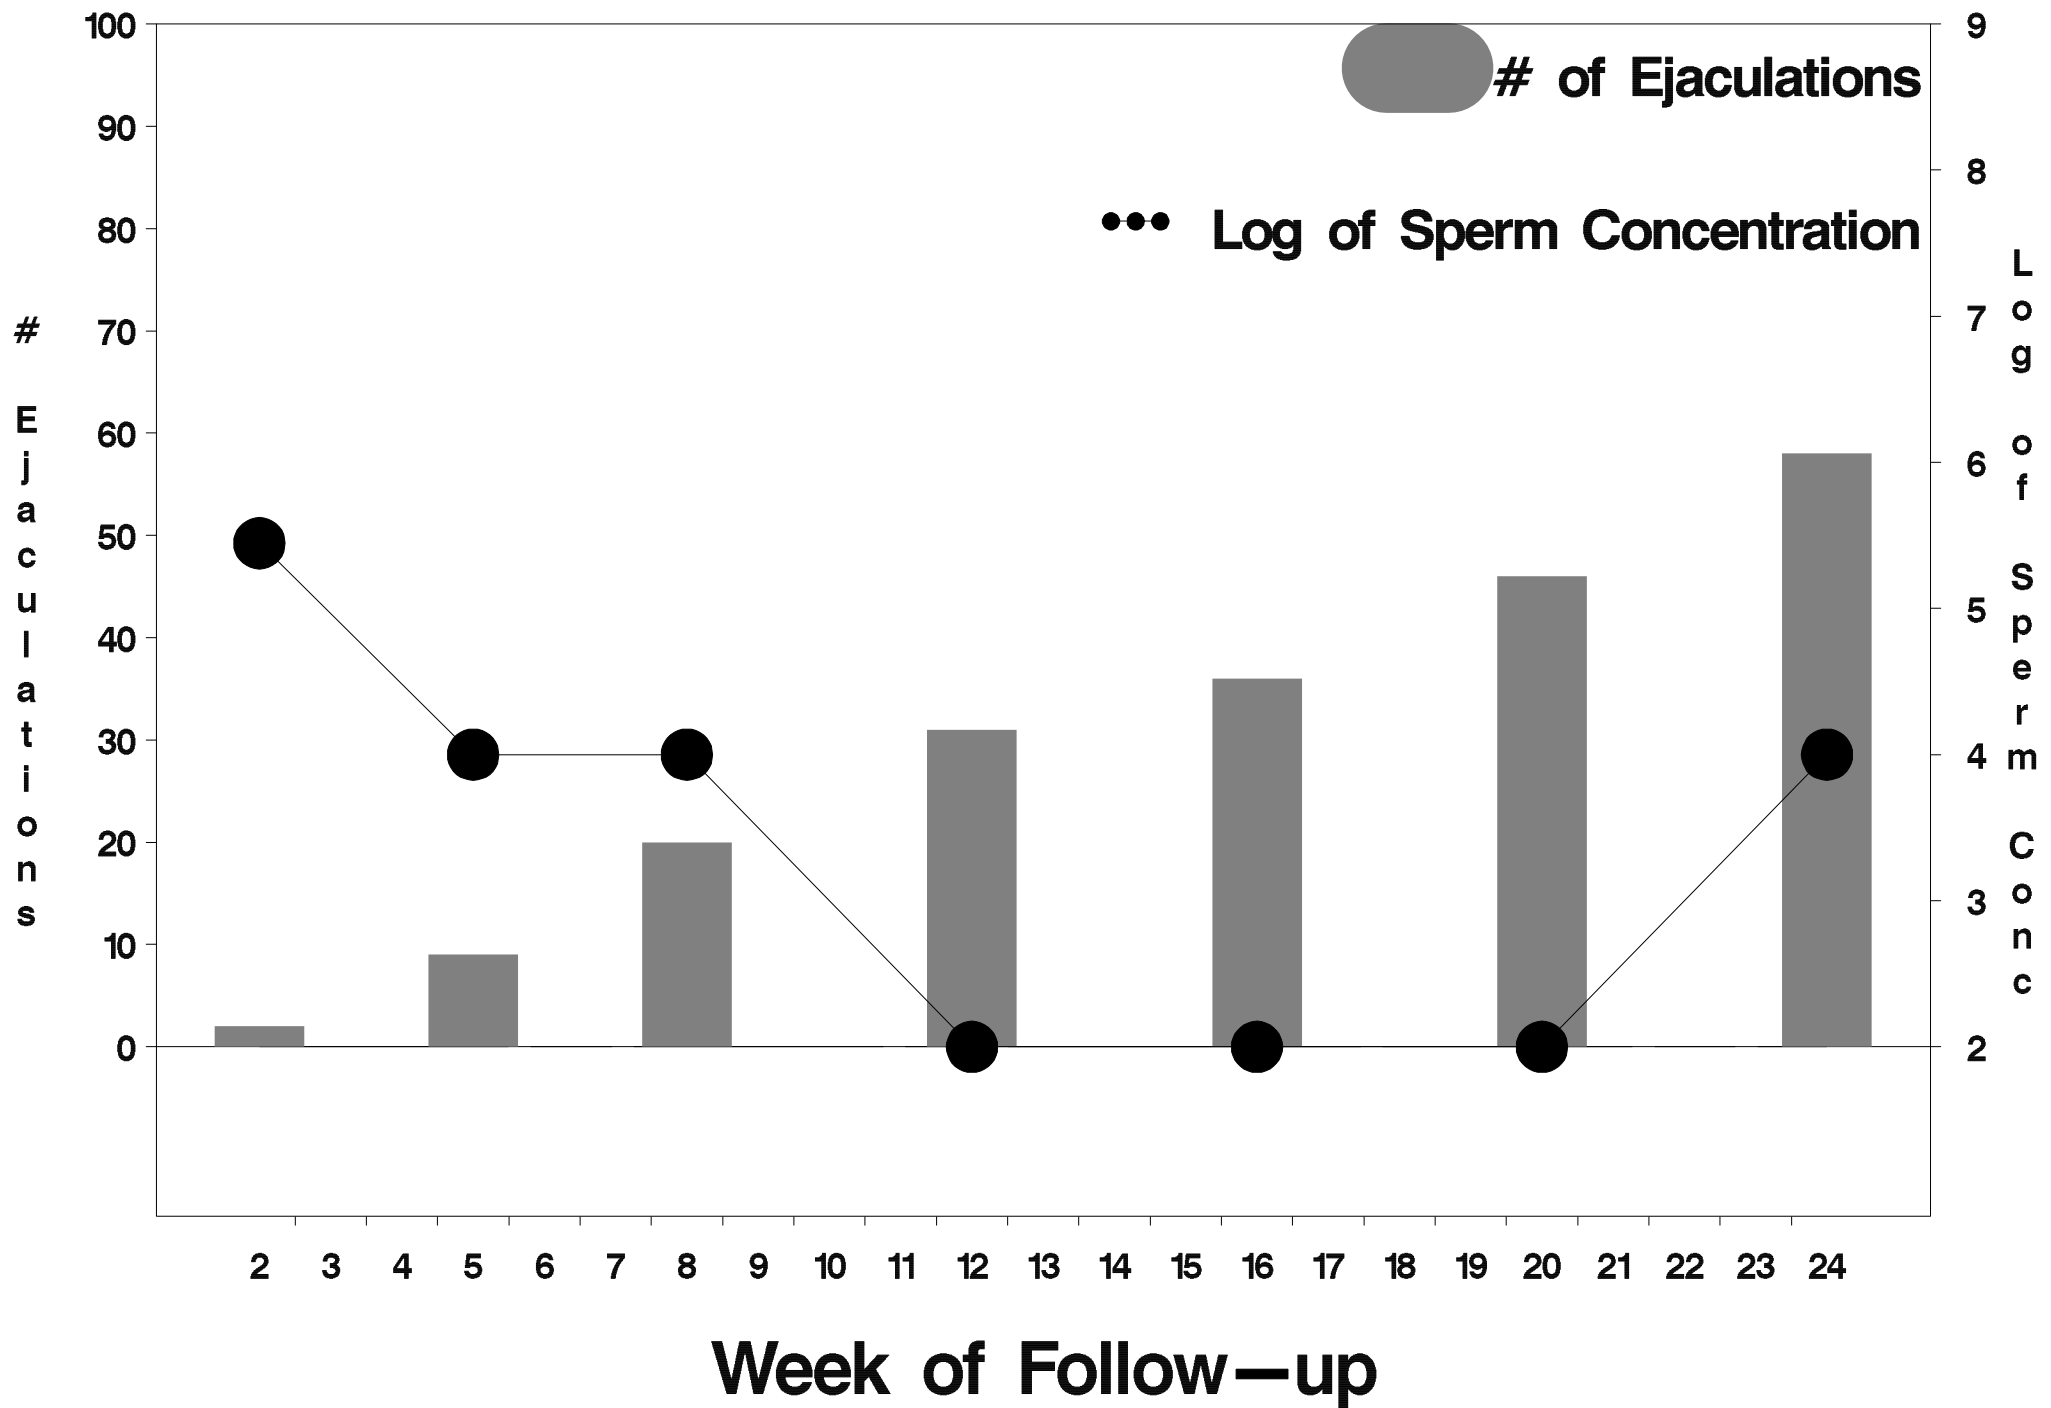

# Participant number= 161

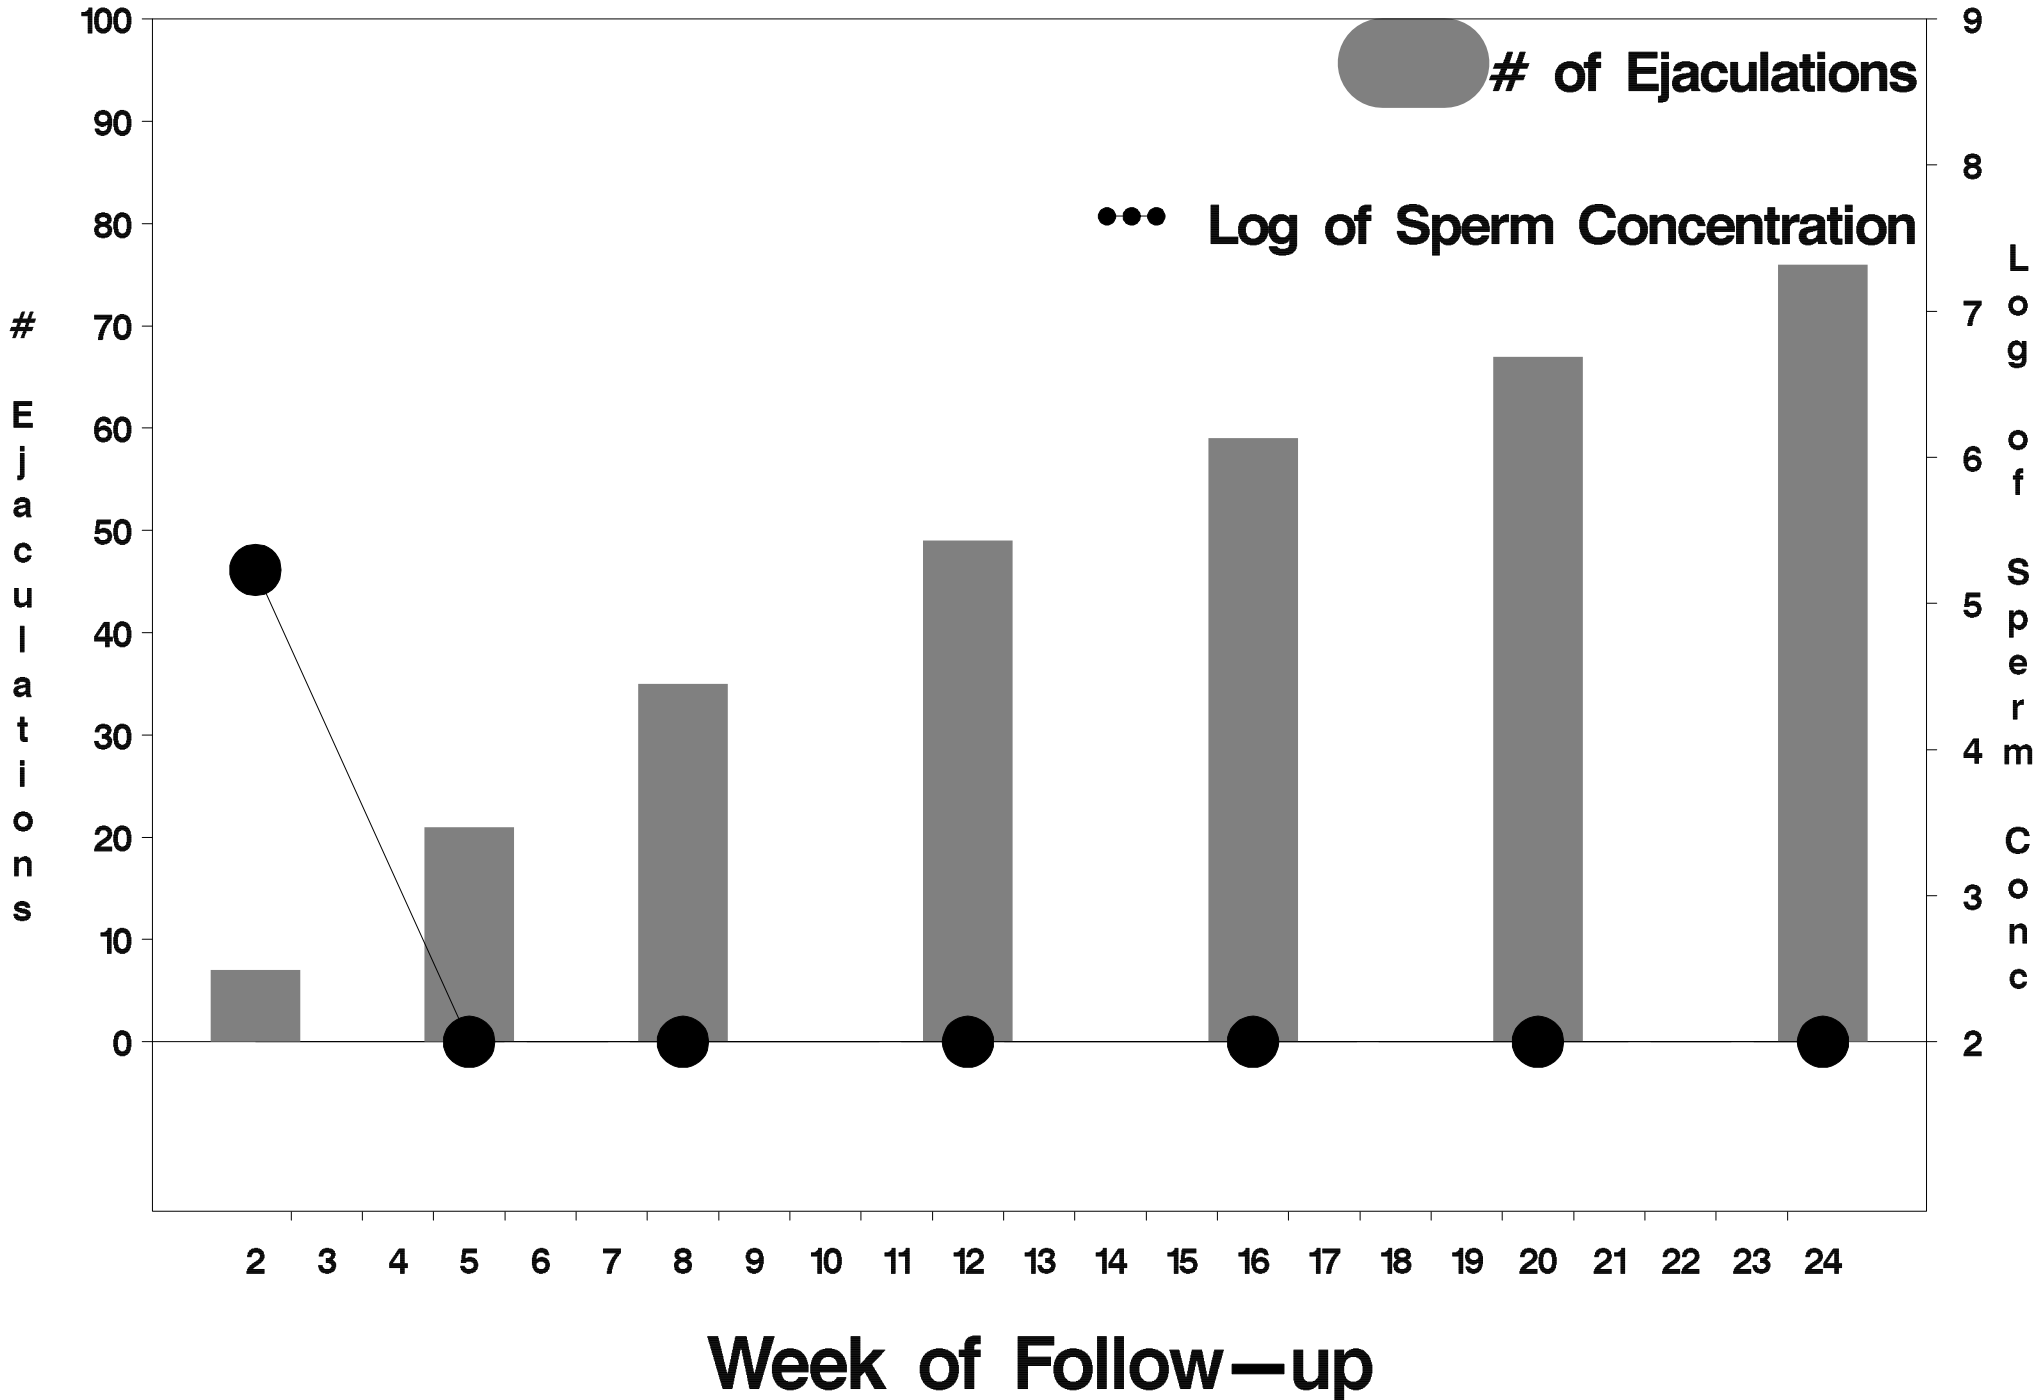

# Participant number= 162

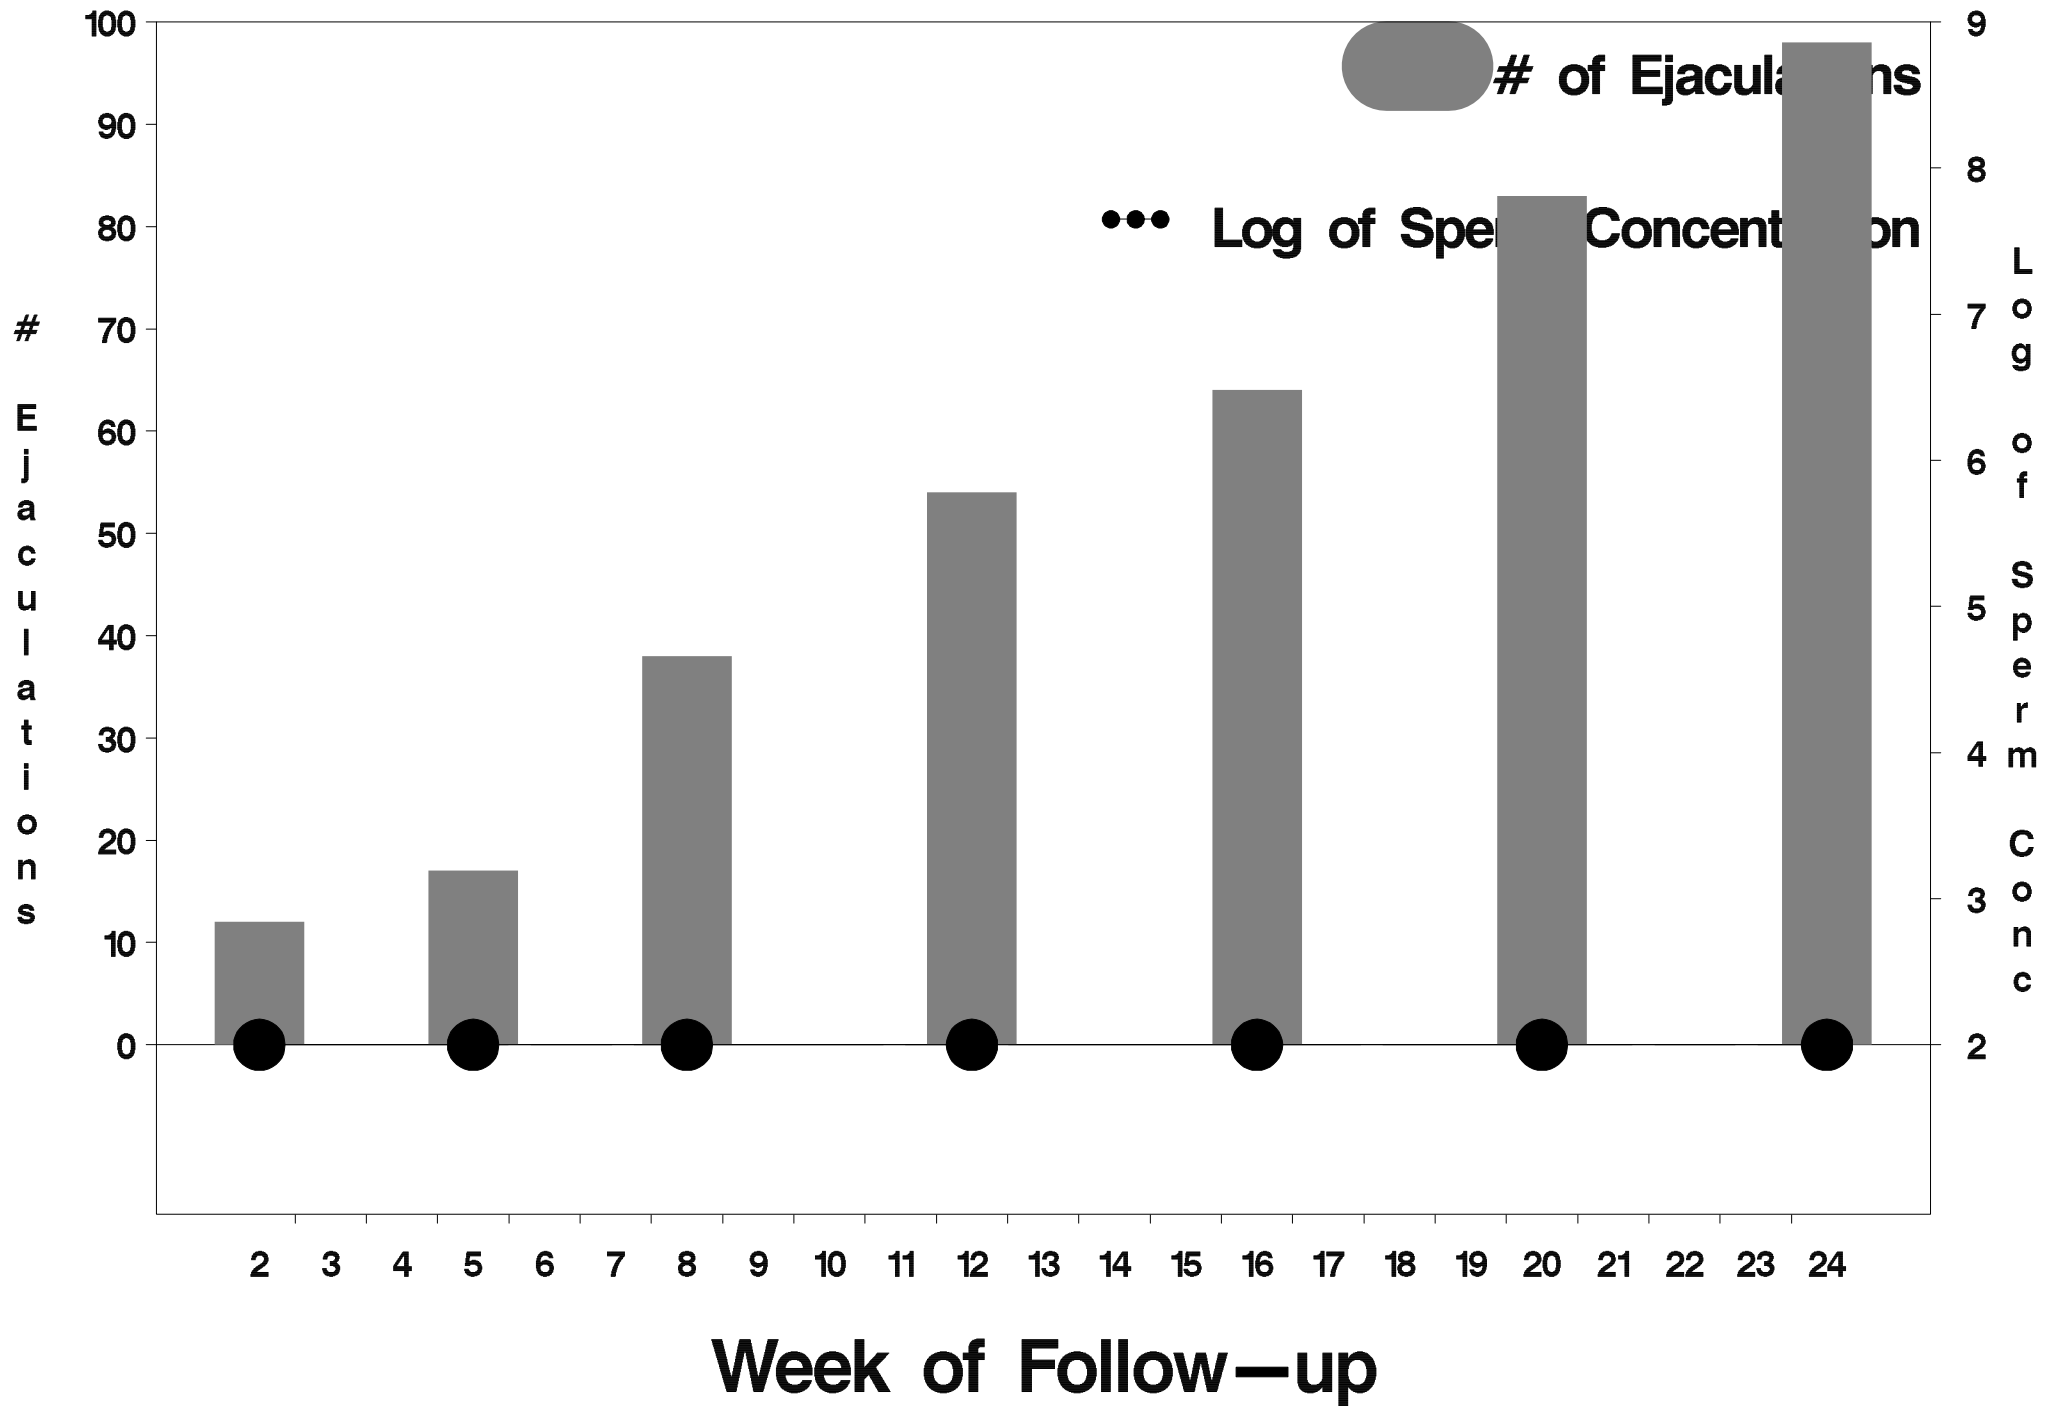

# Participant number= 163

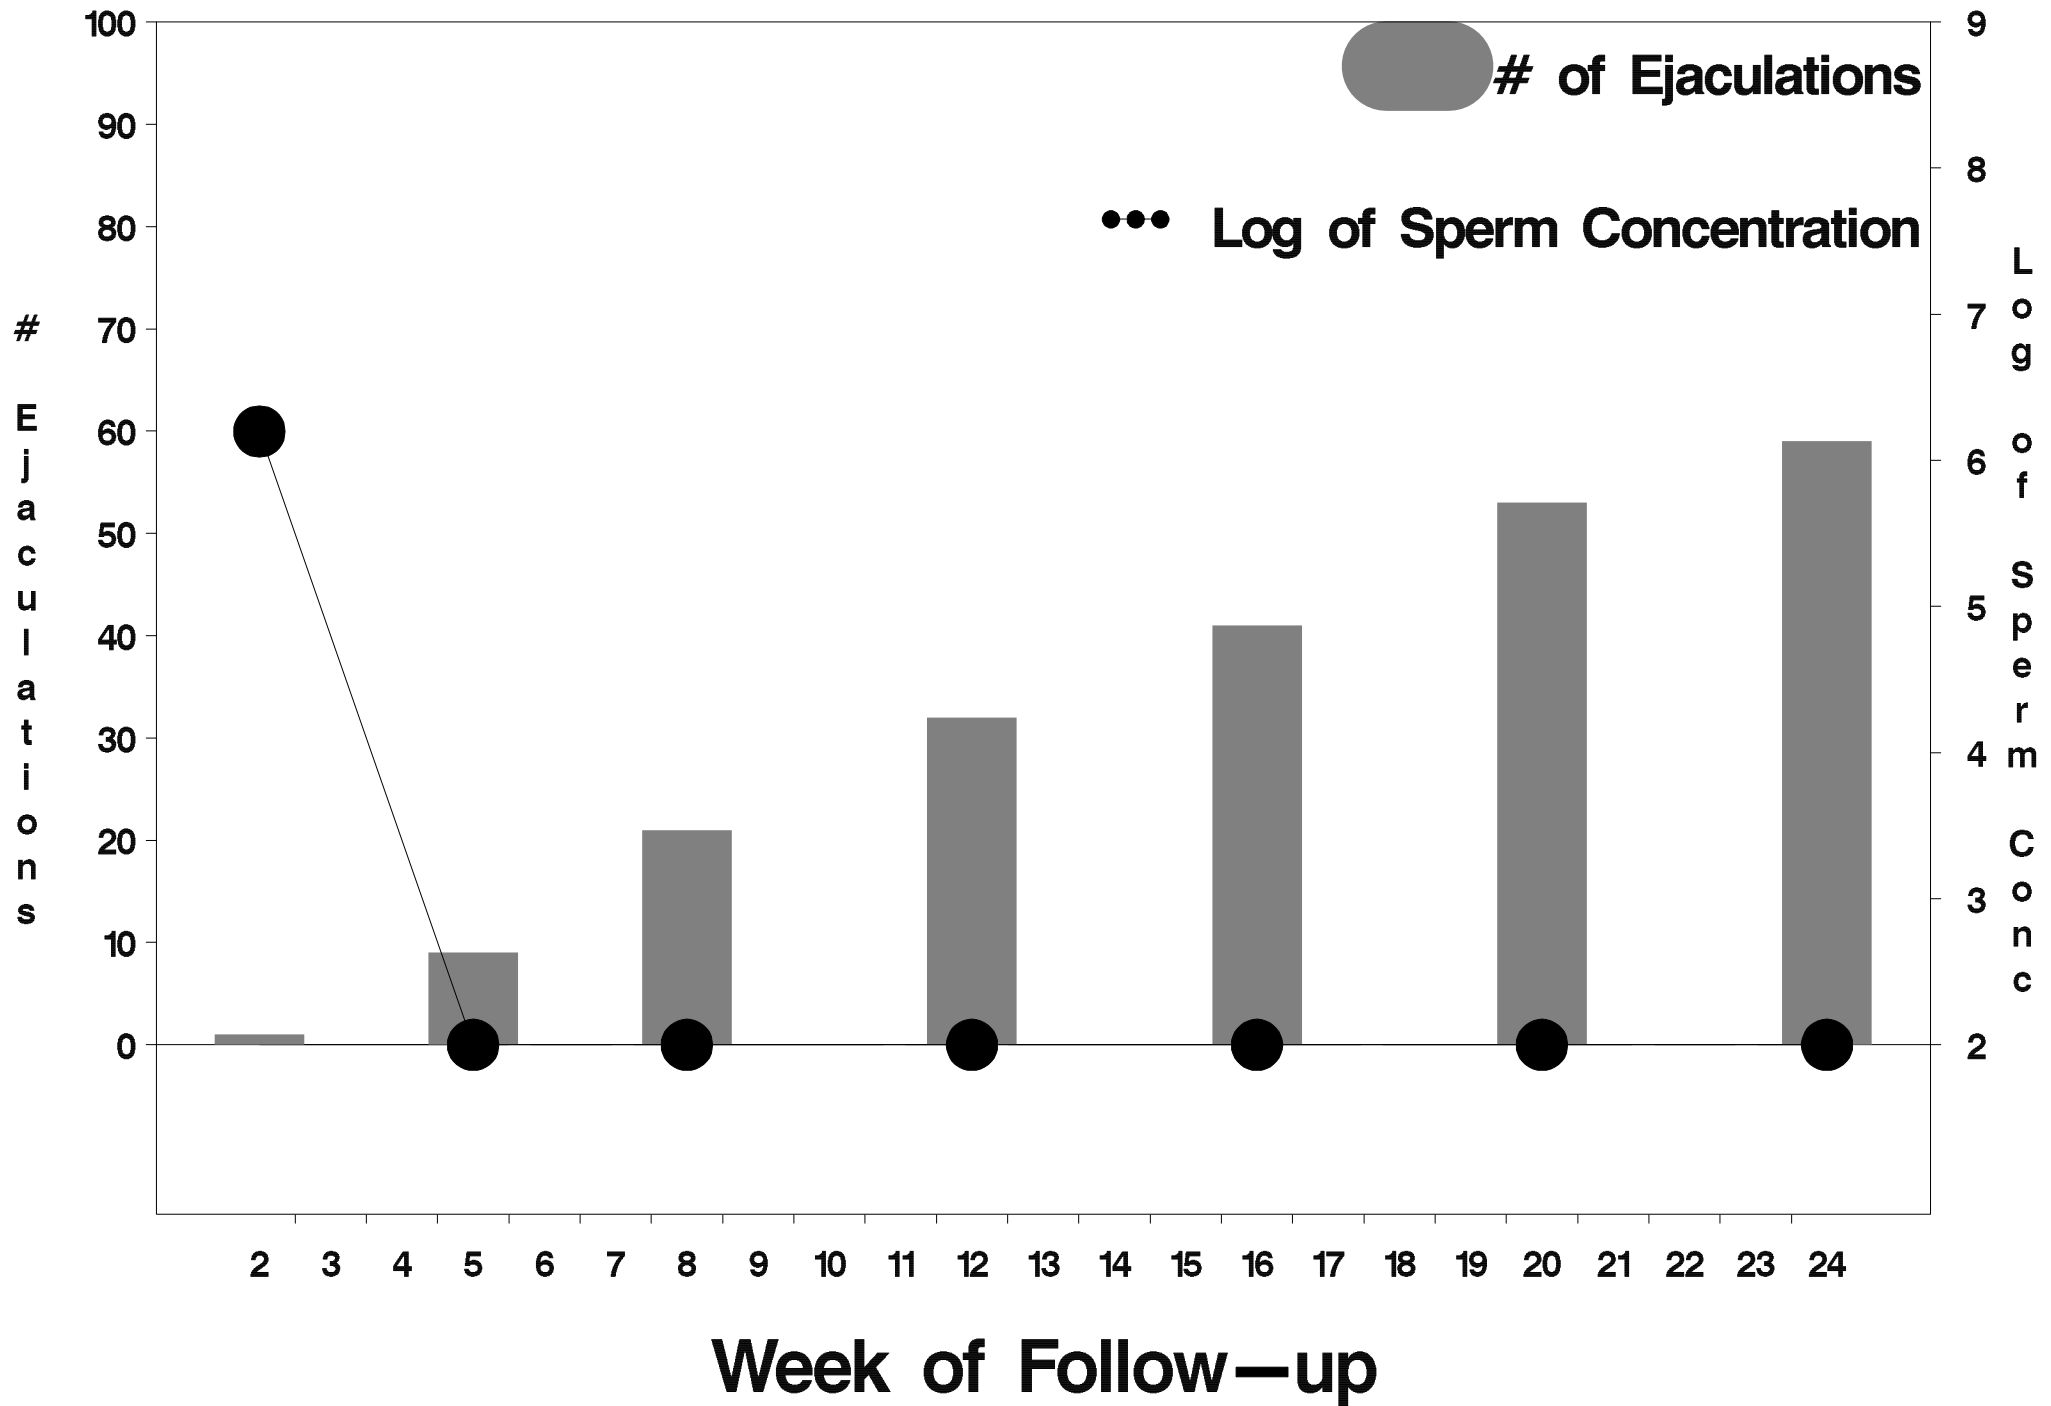

# Participant number= 164

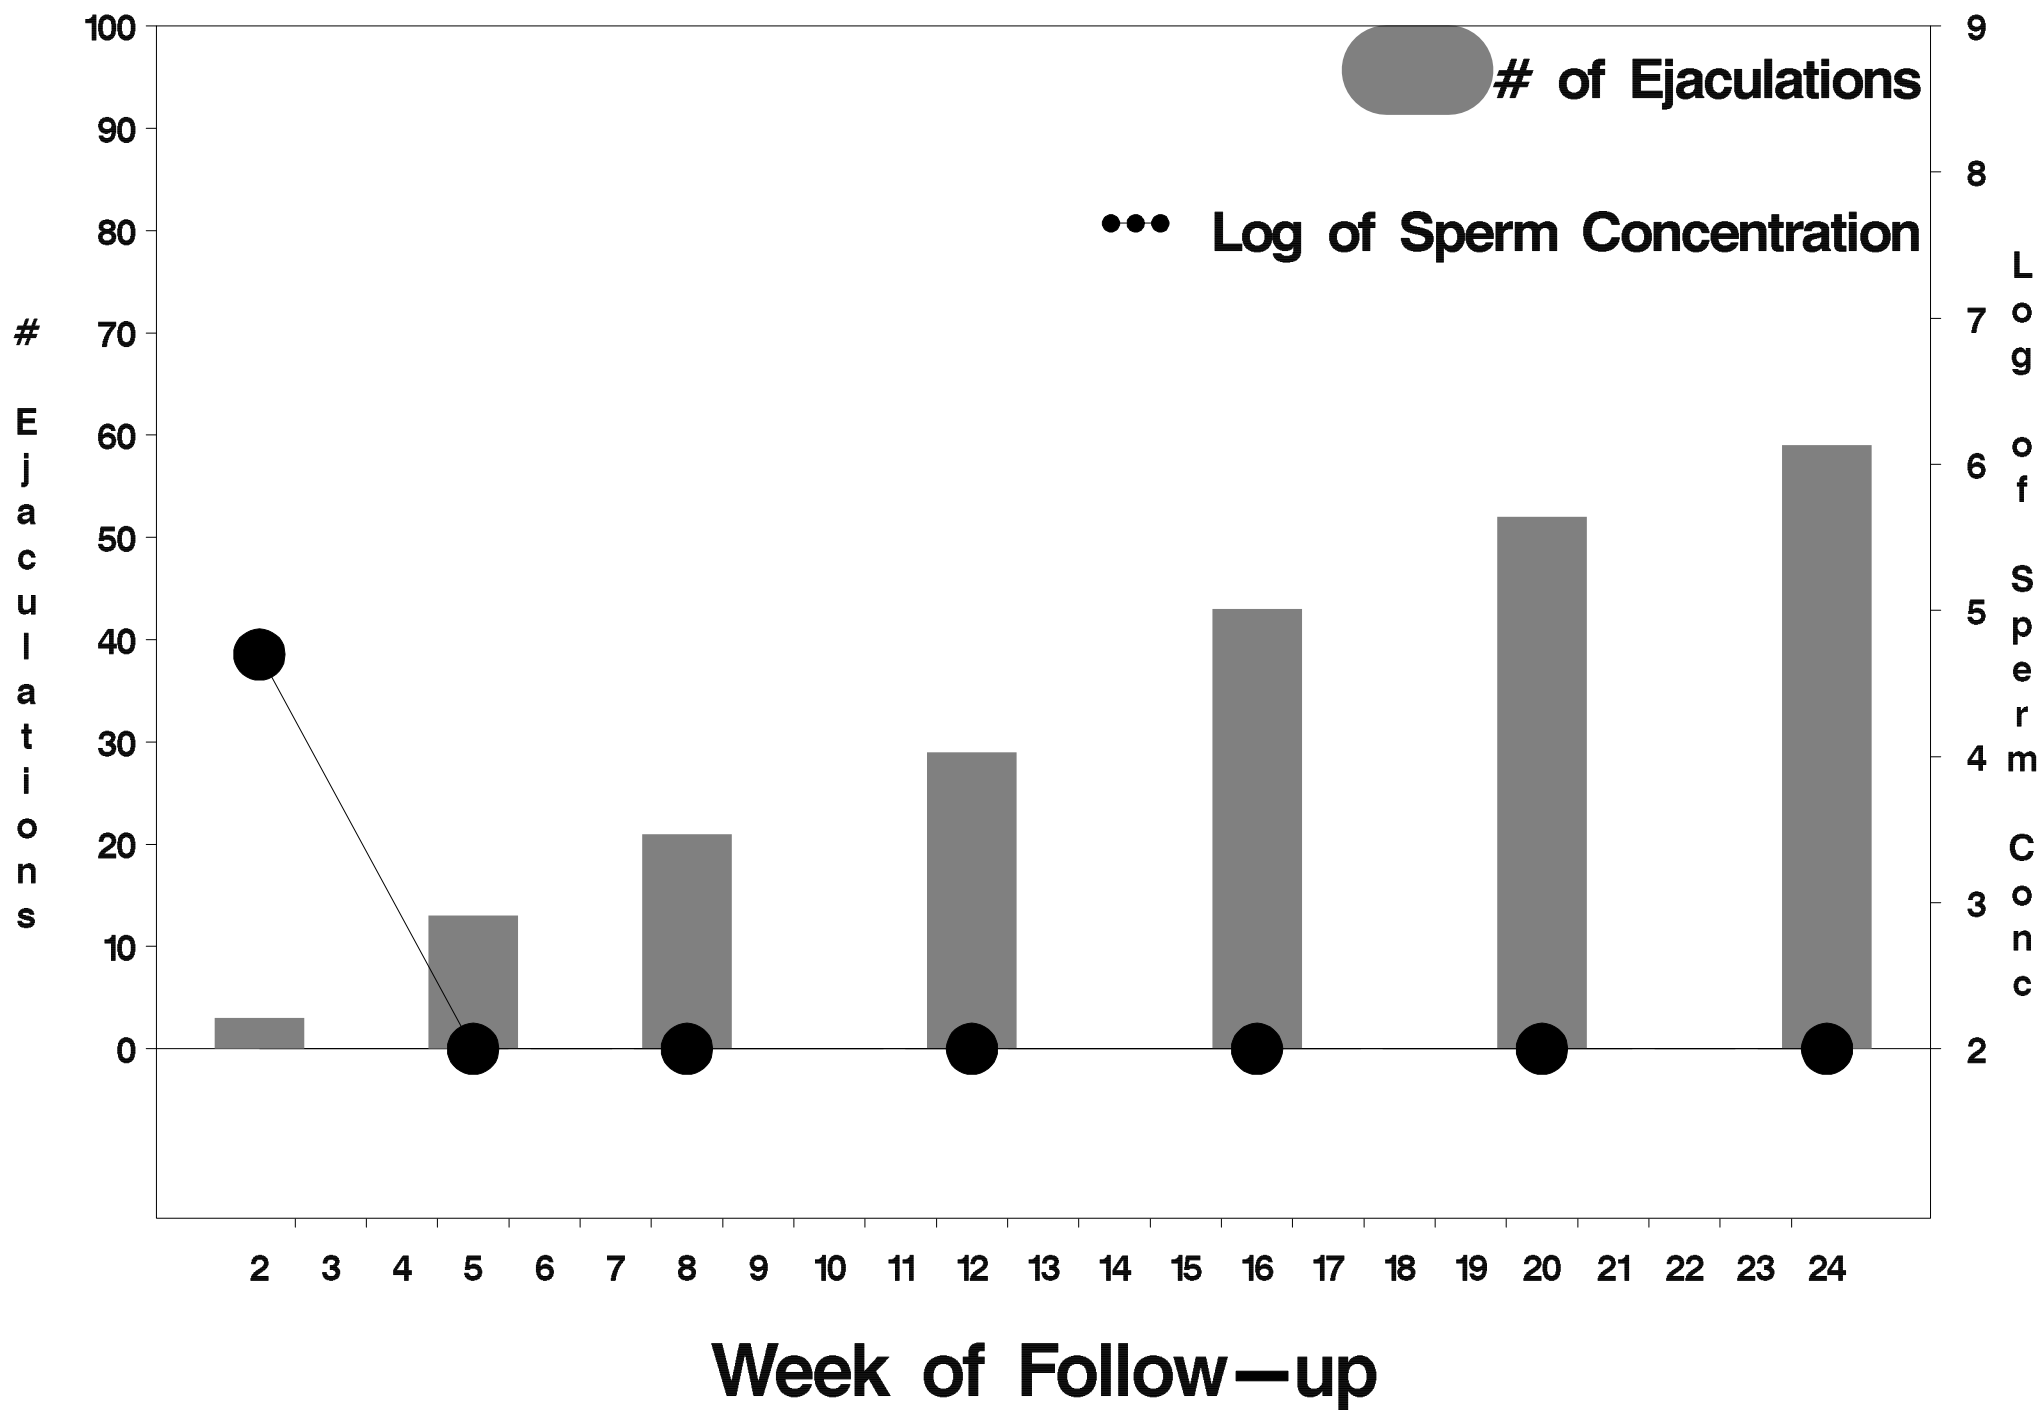



# Participant number= 165

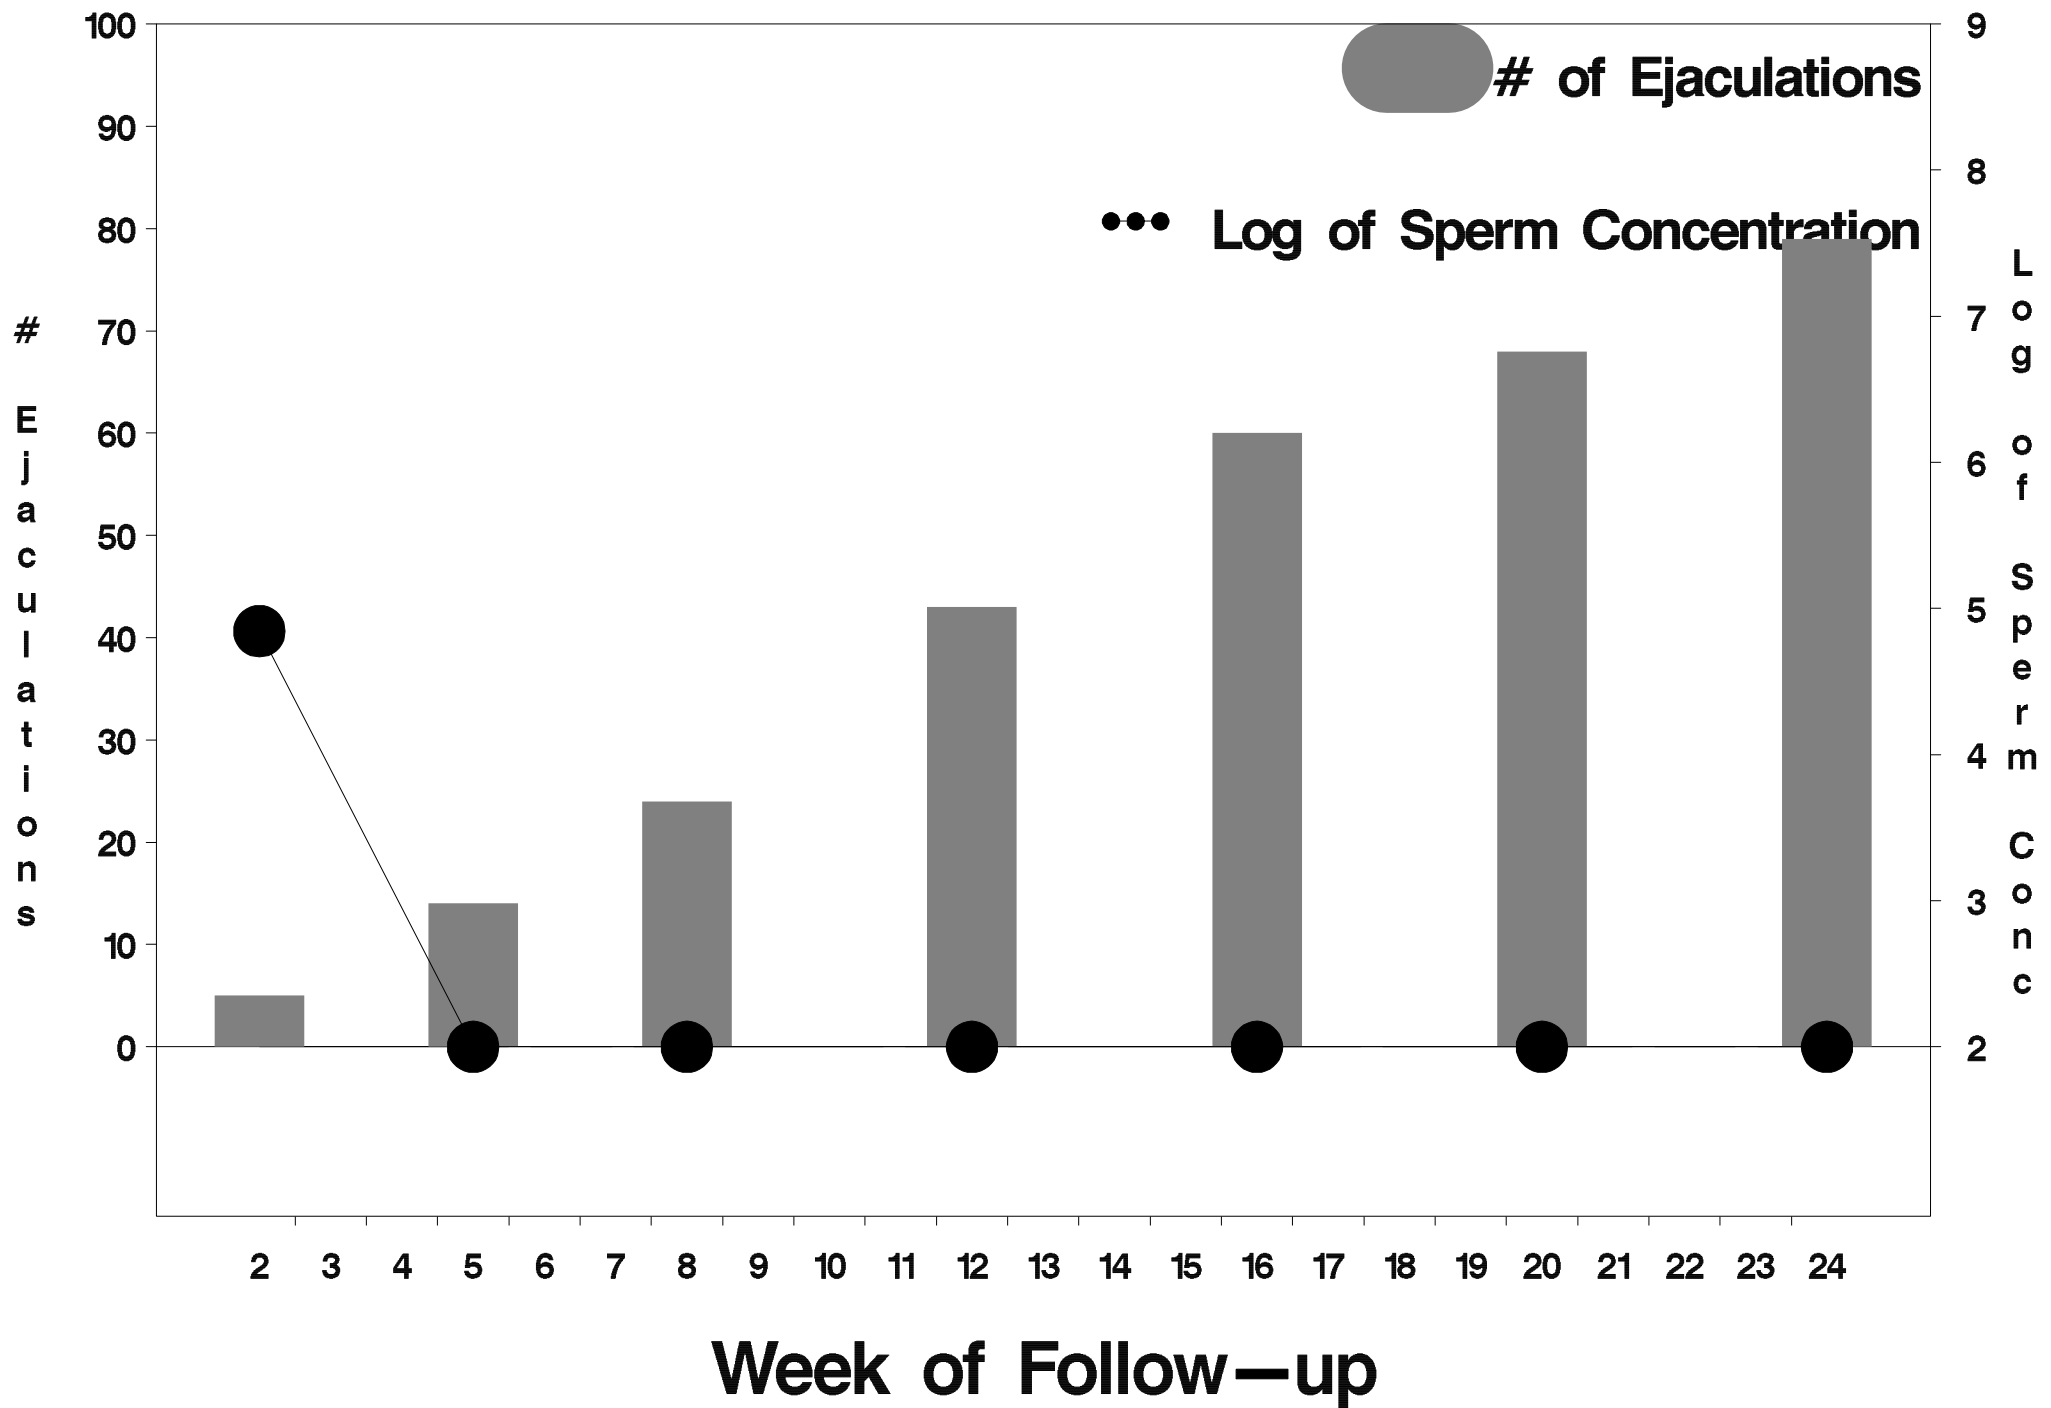

# Participant number= 166

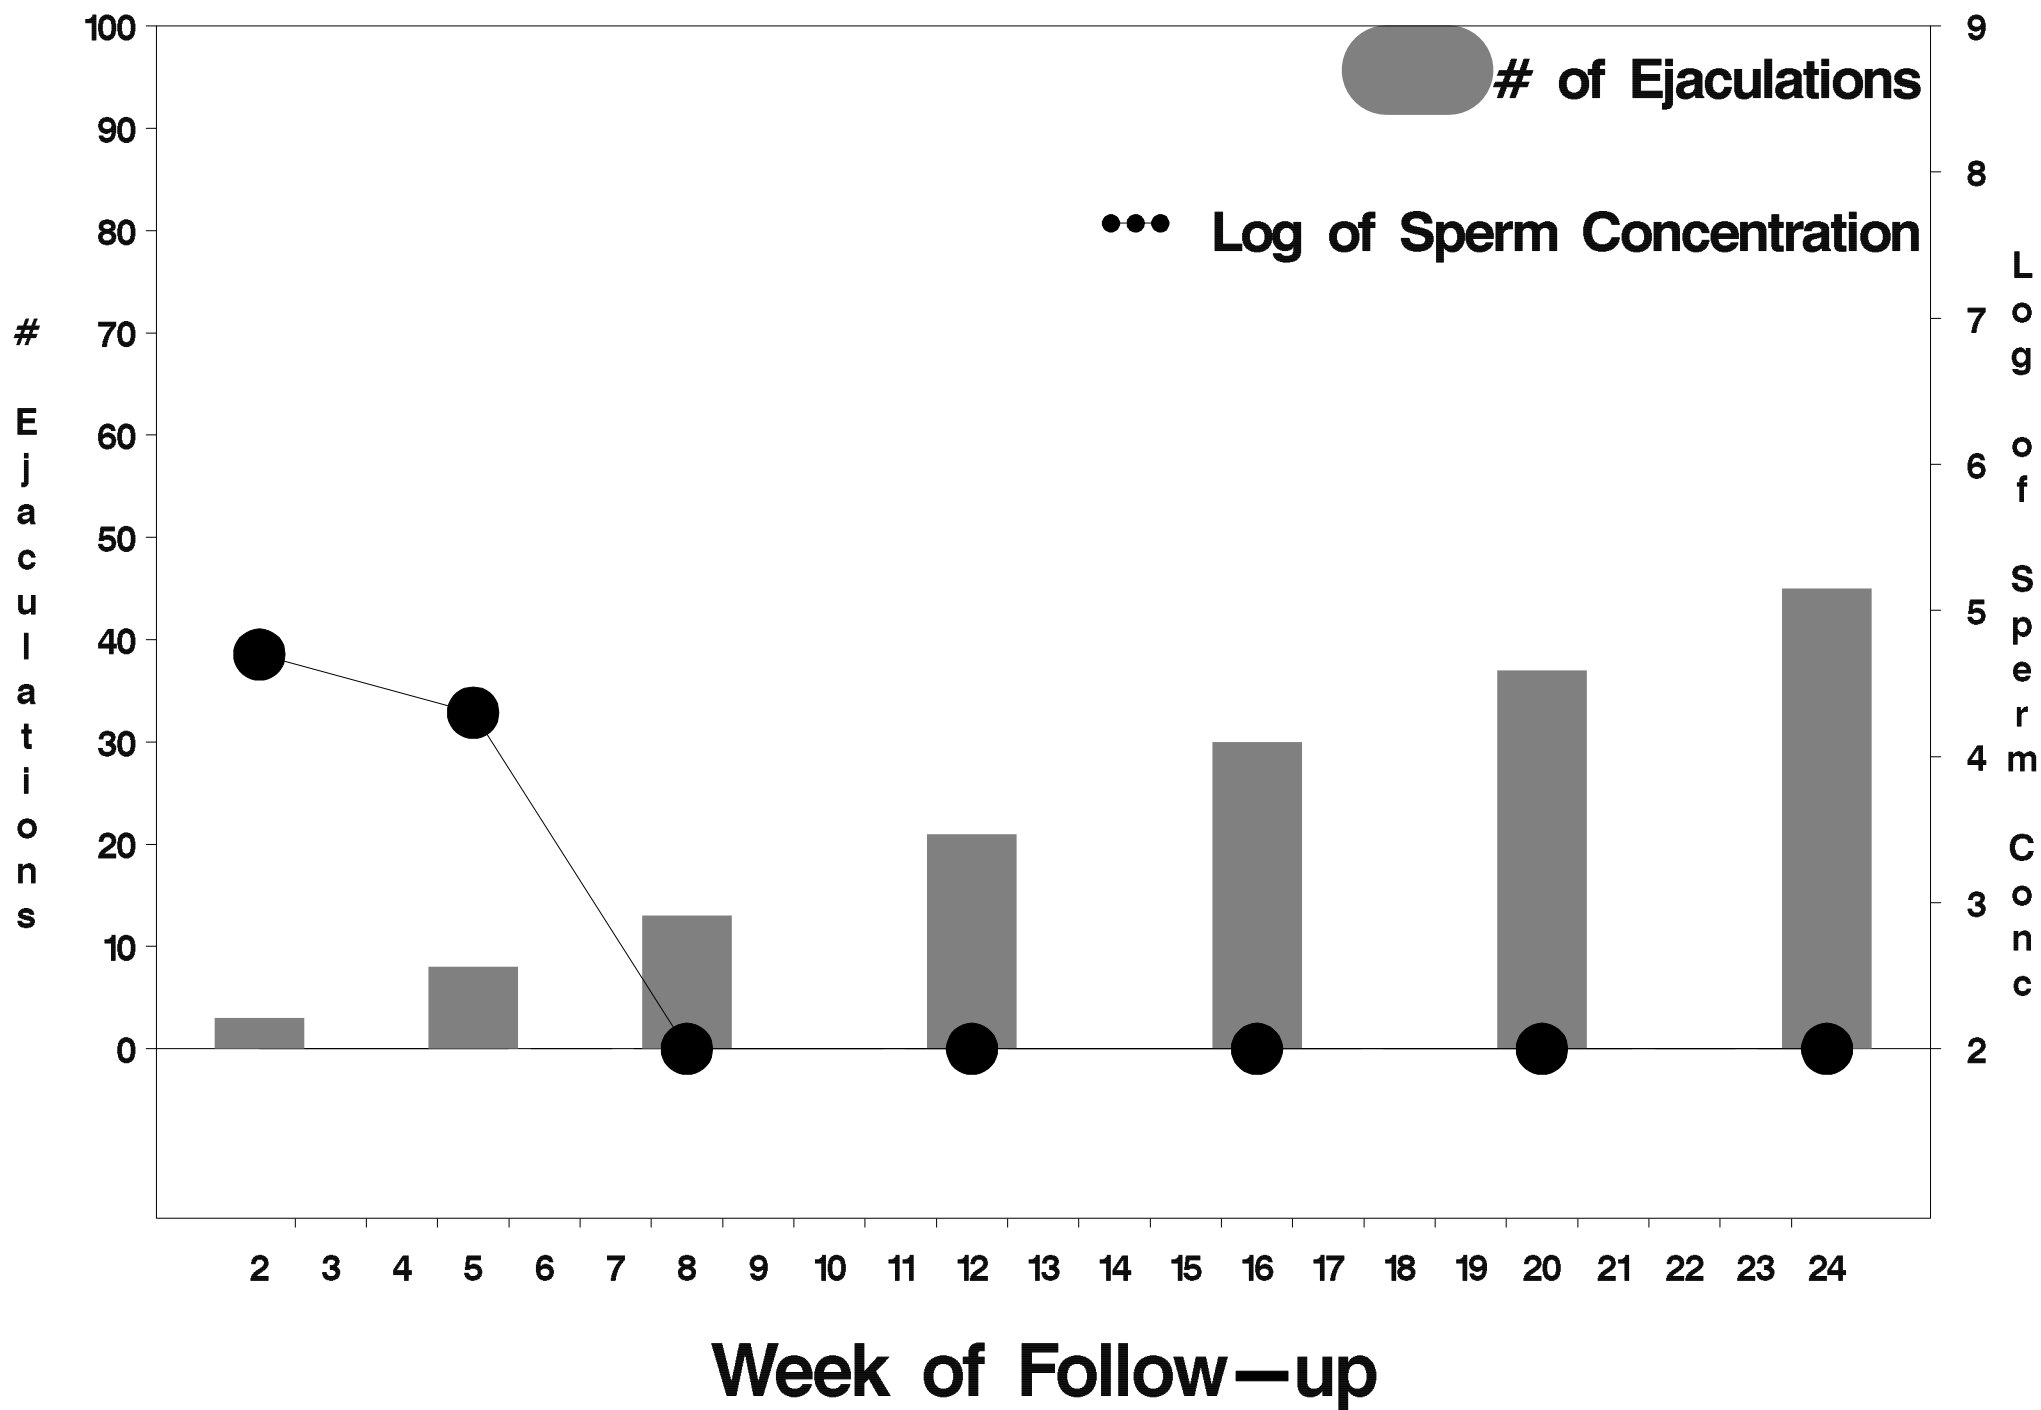

# Participant number= 167

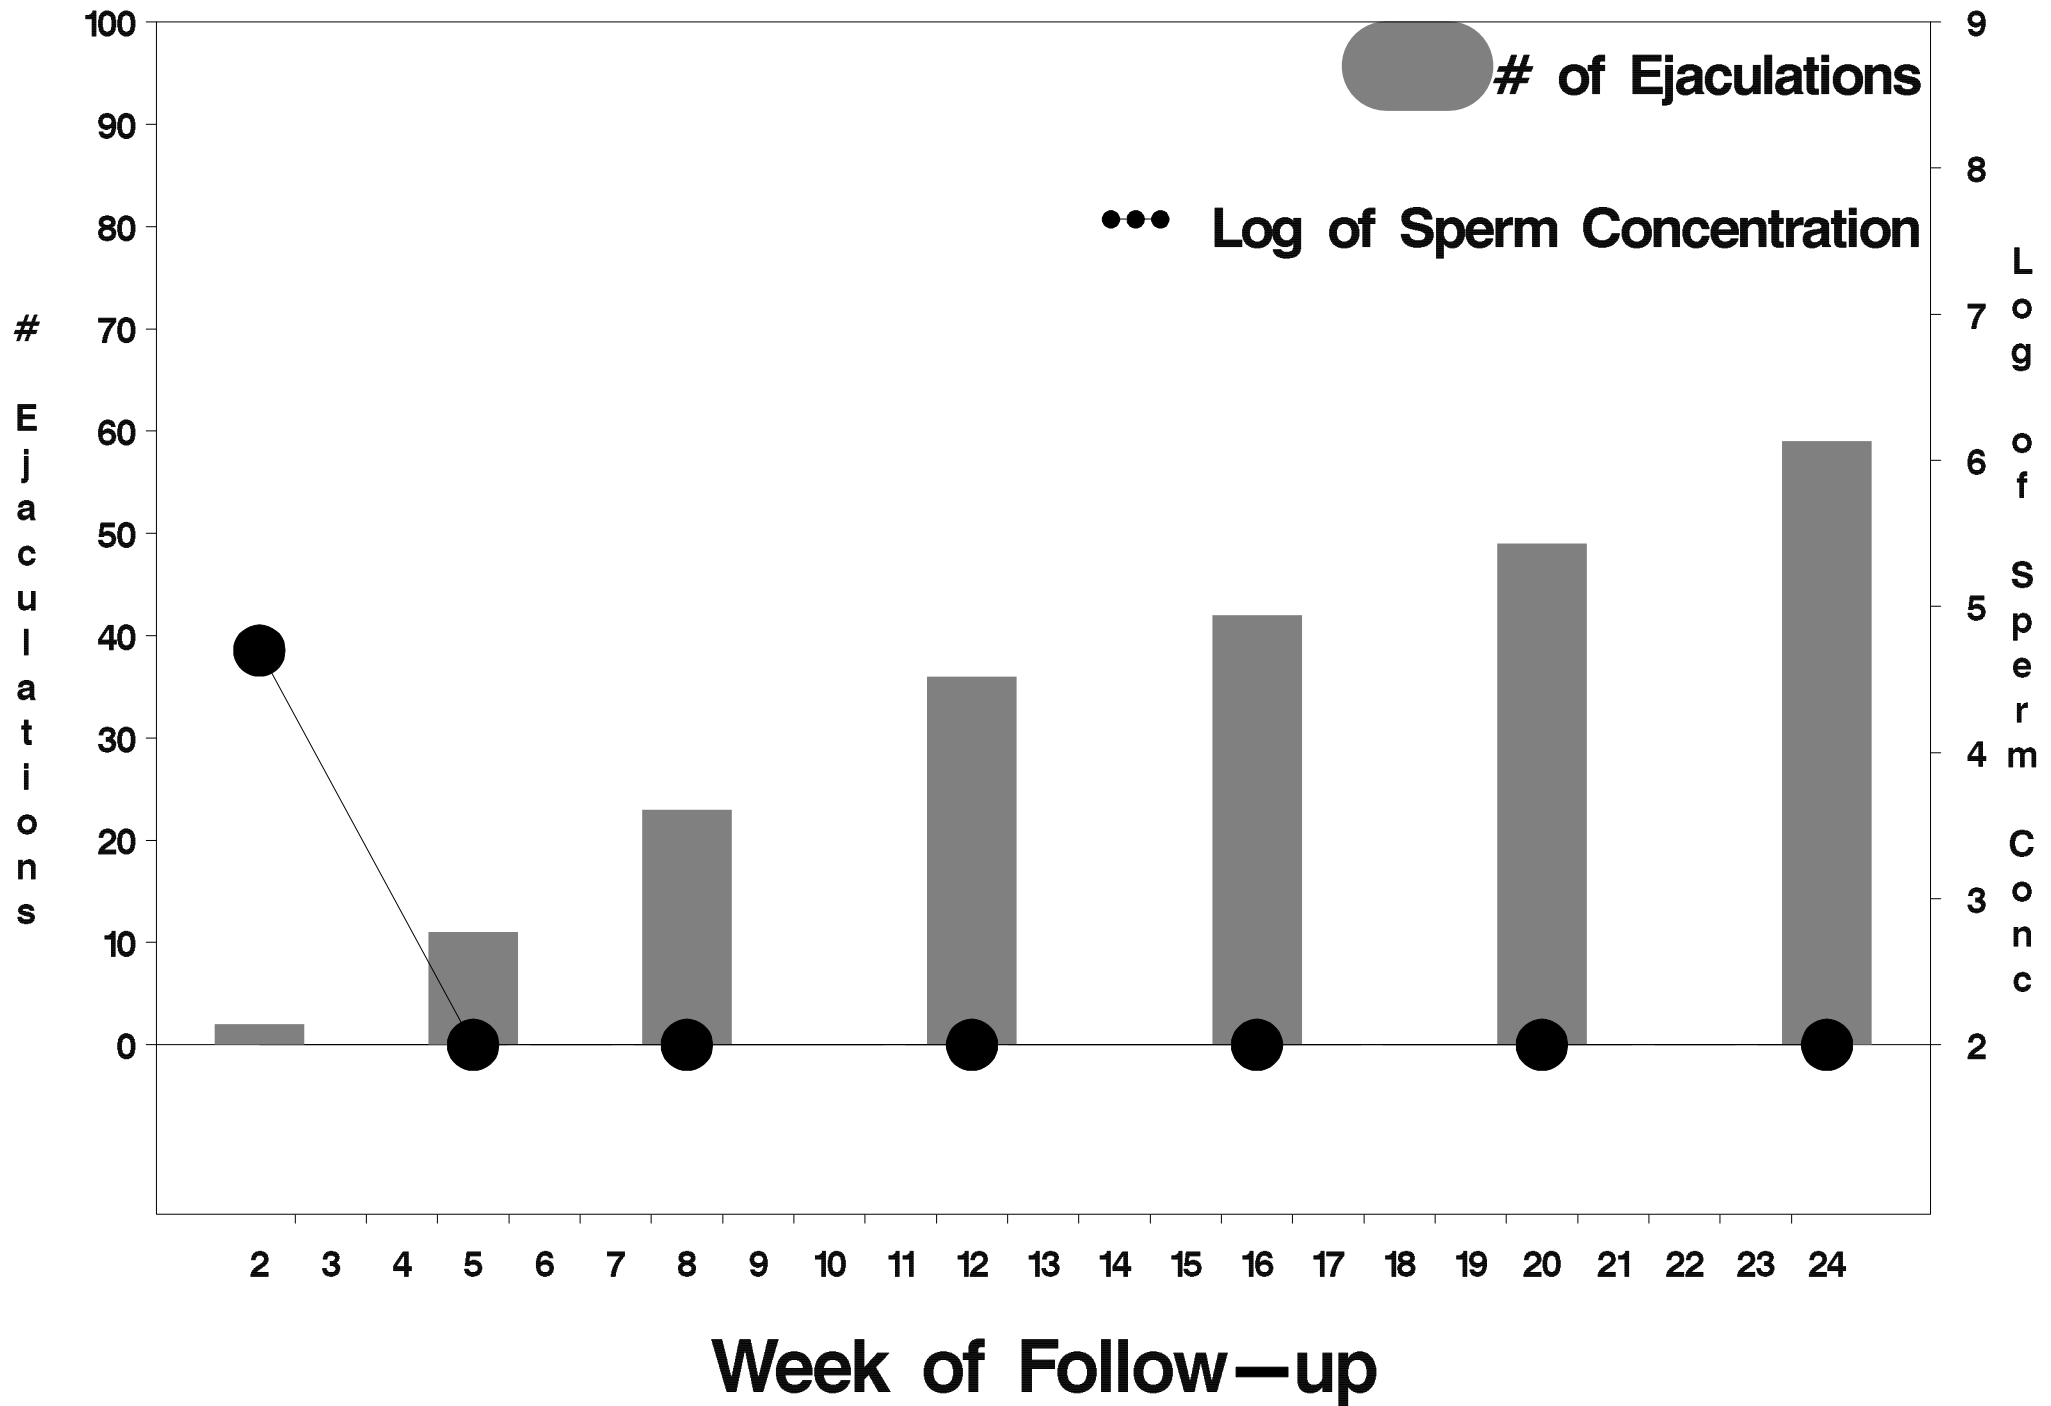

# Participant number= 168

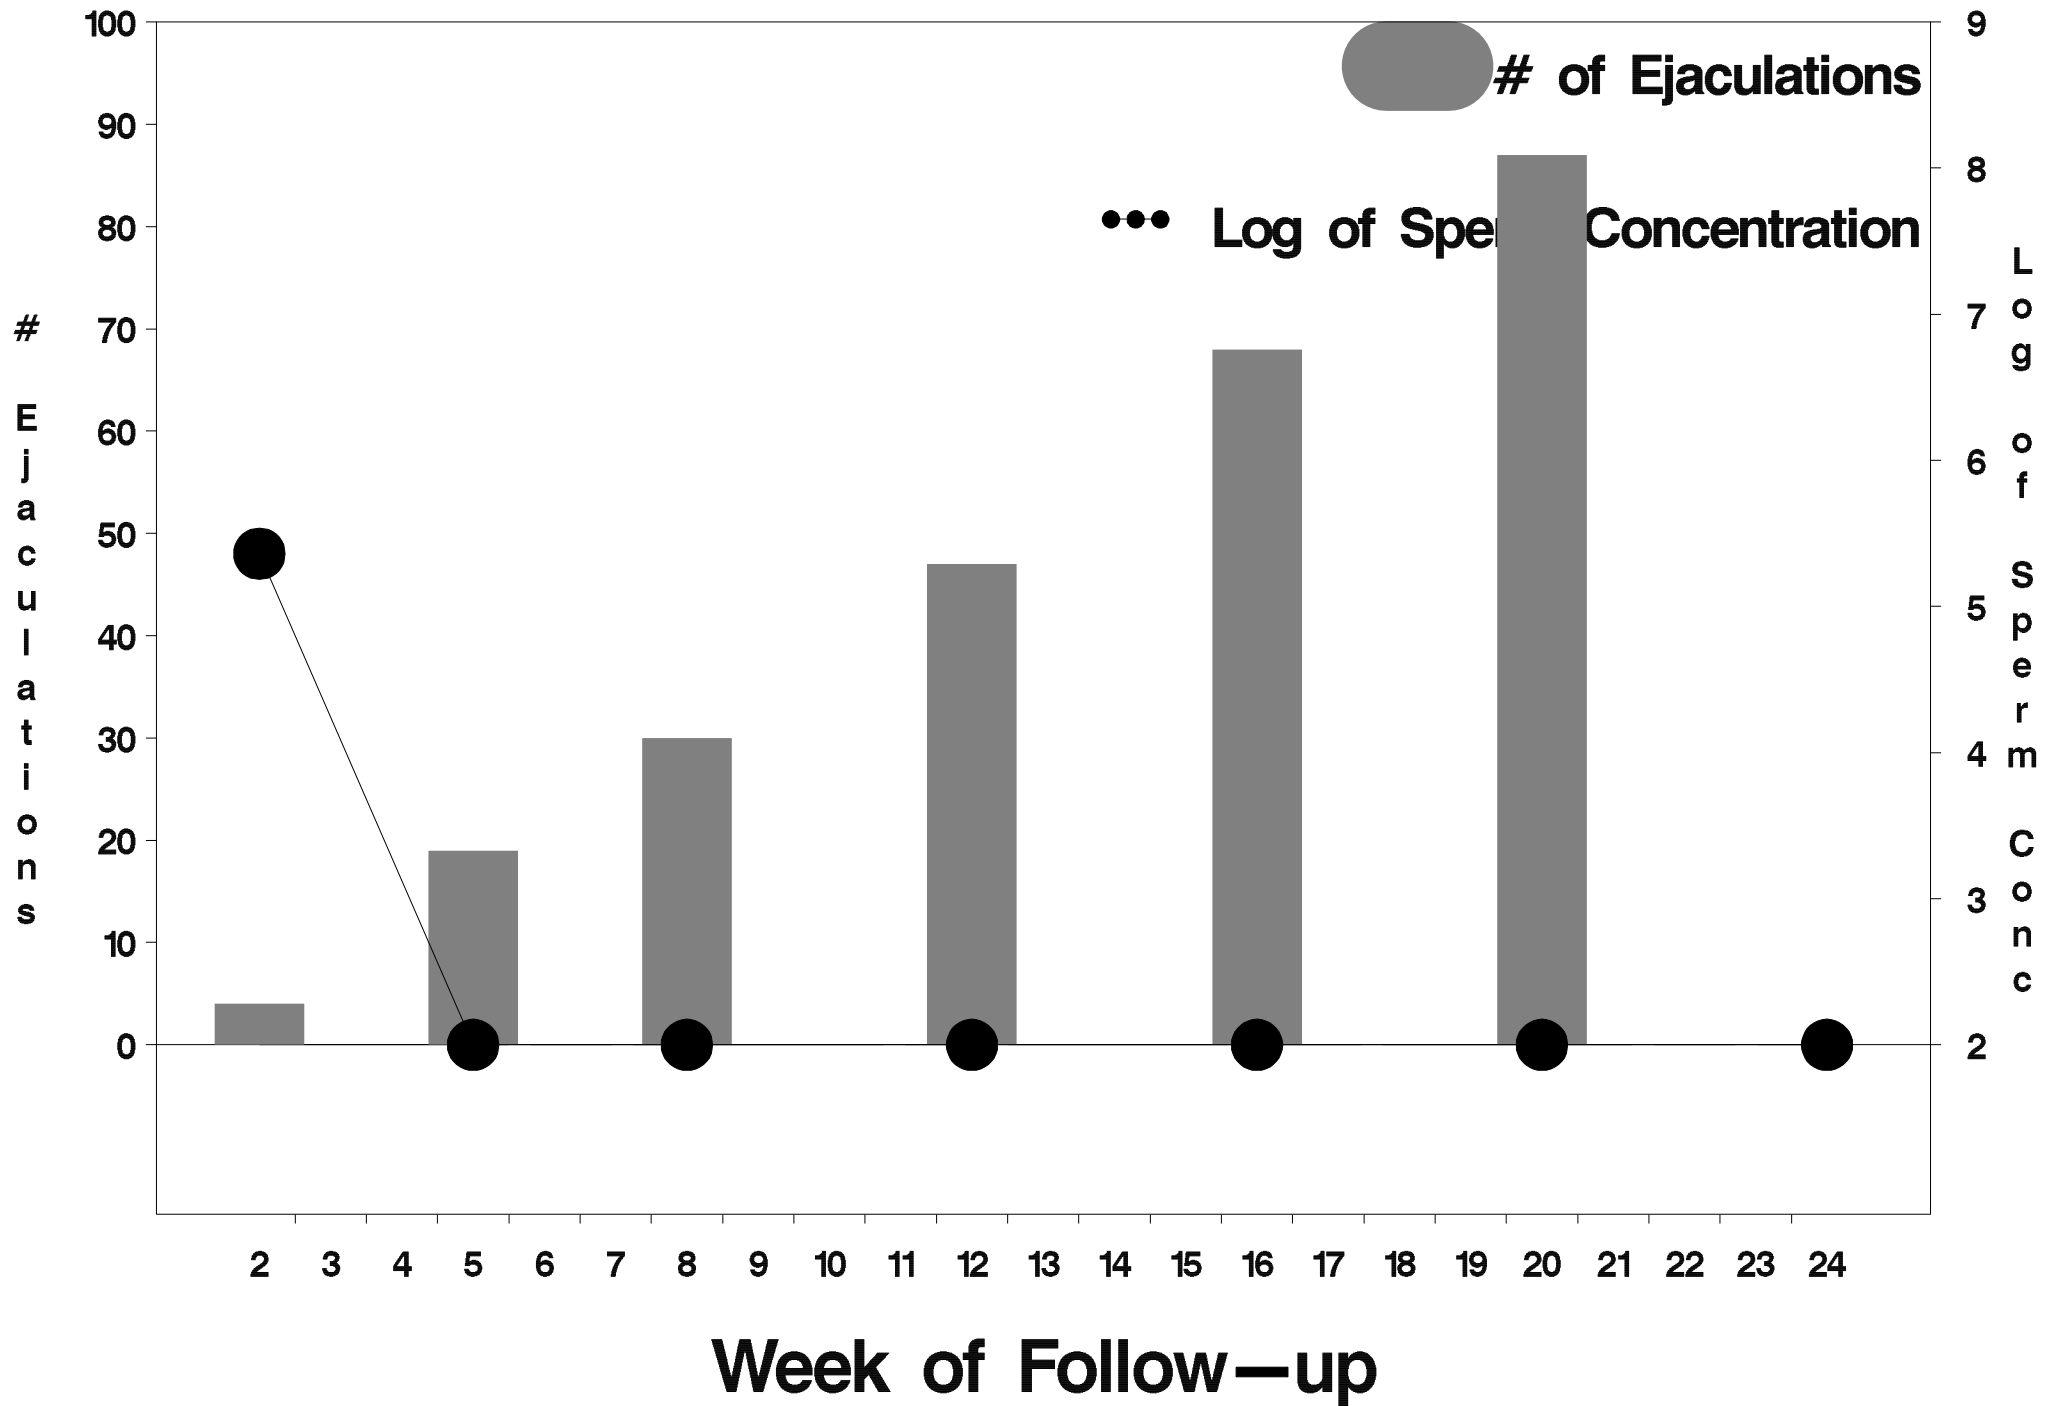

# Participant number= 169

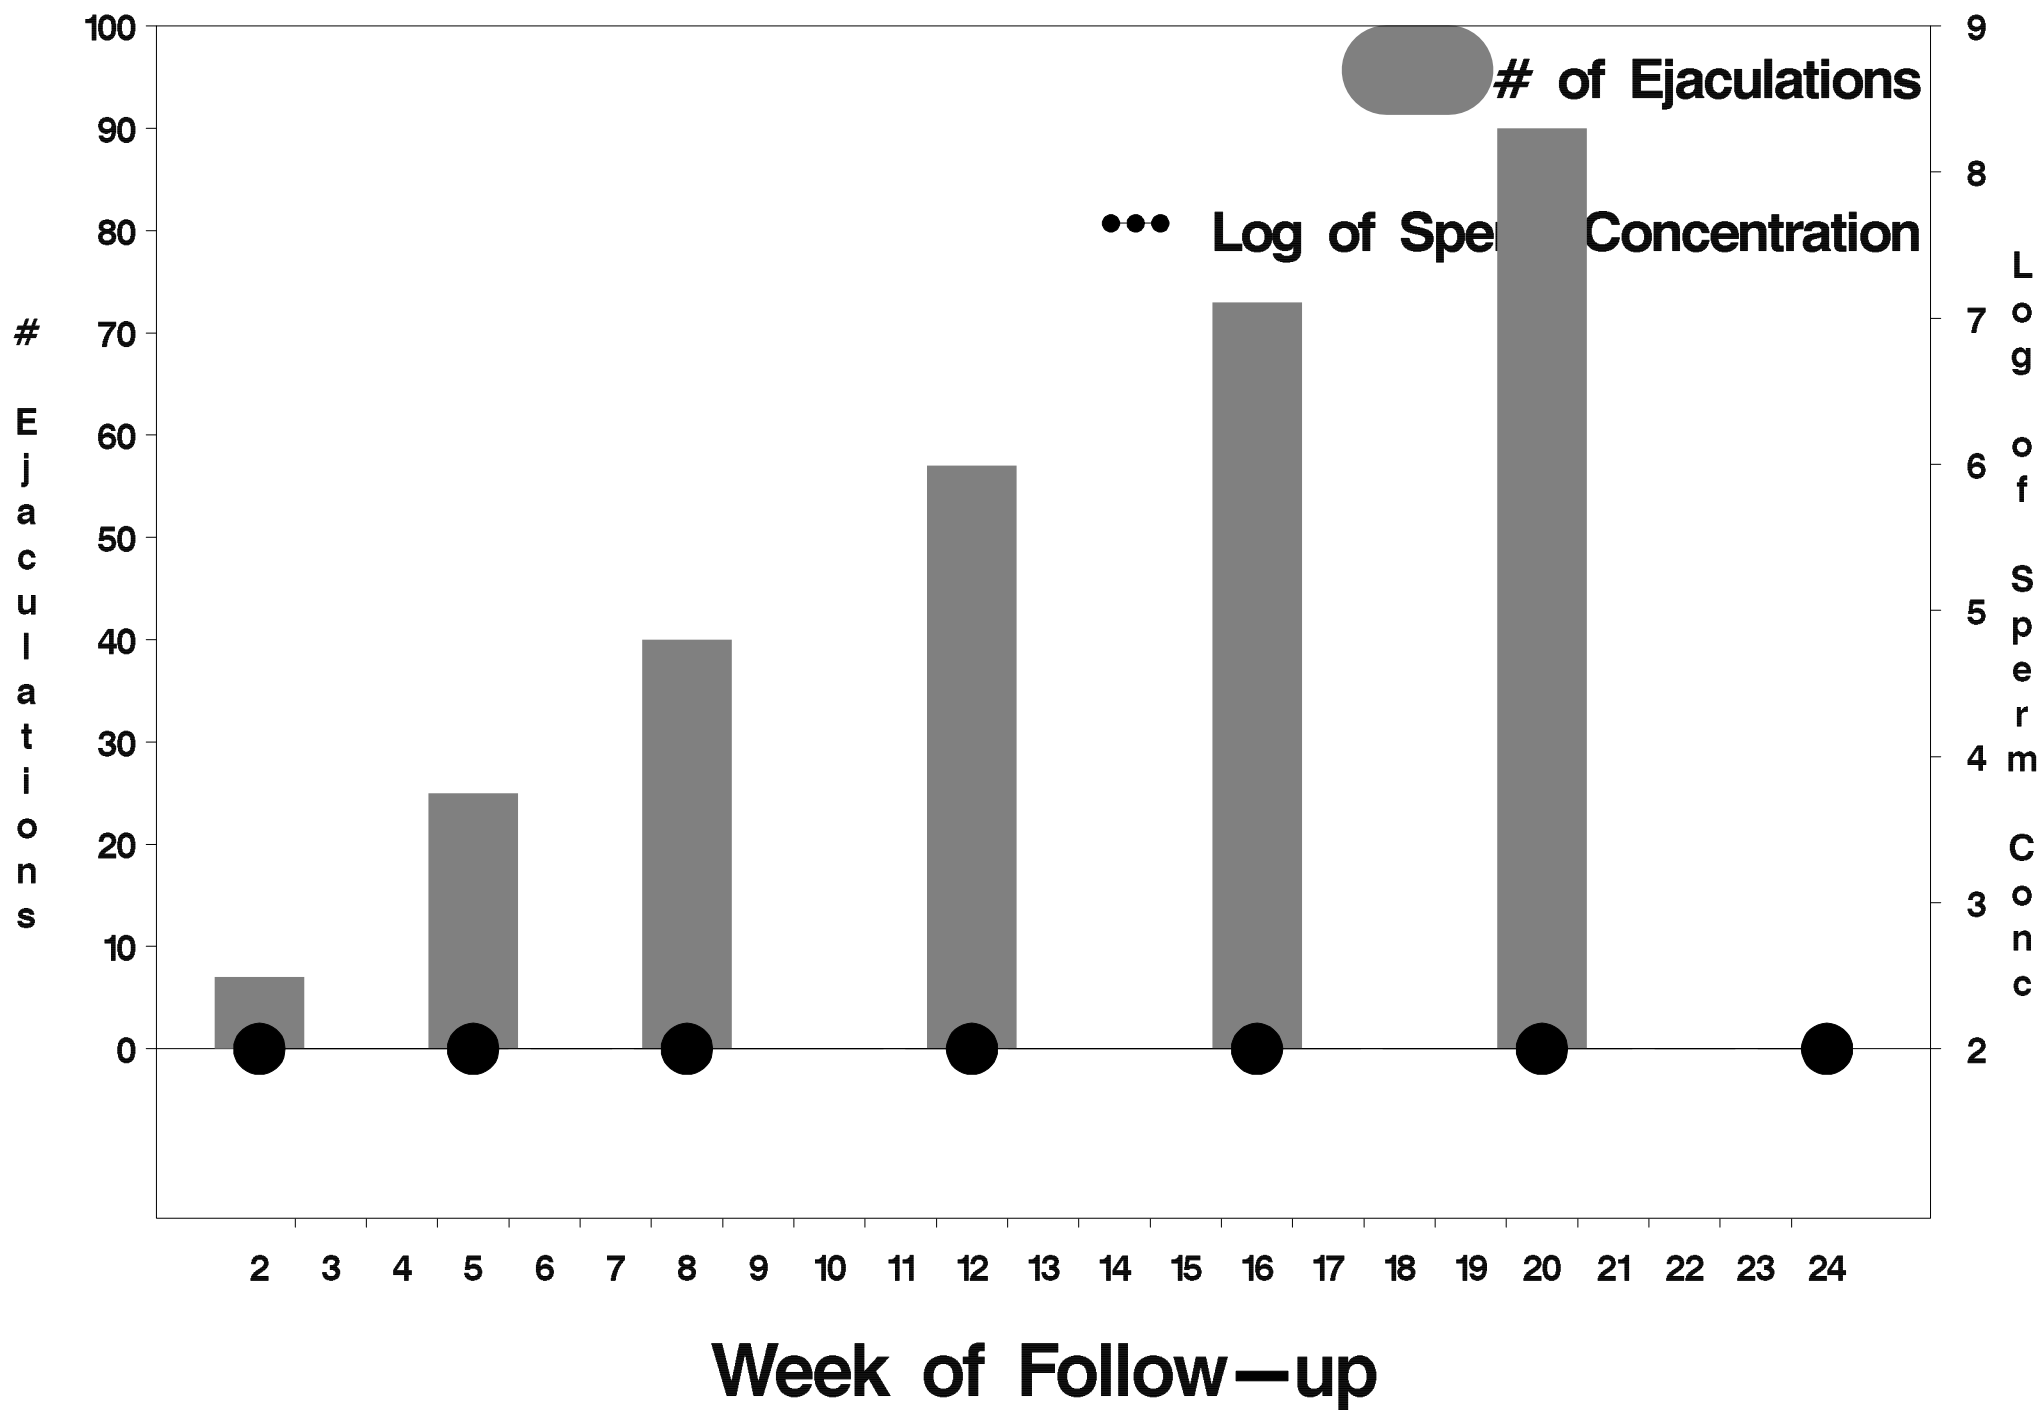

# Participant number= 170

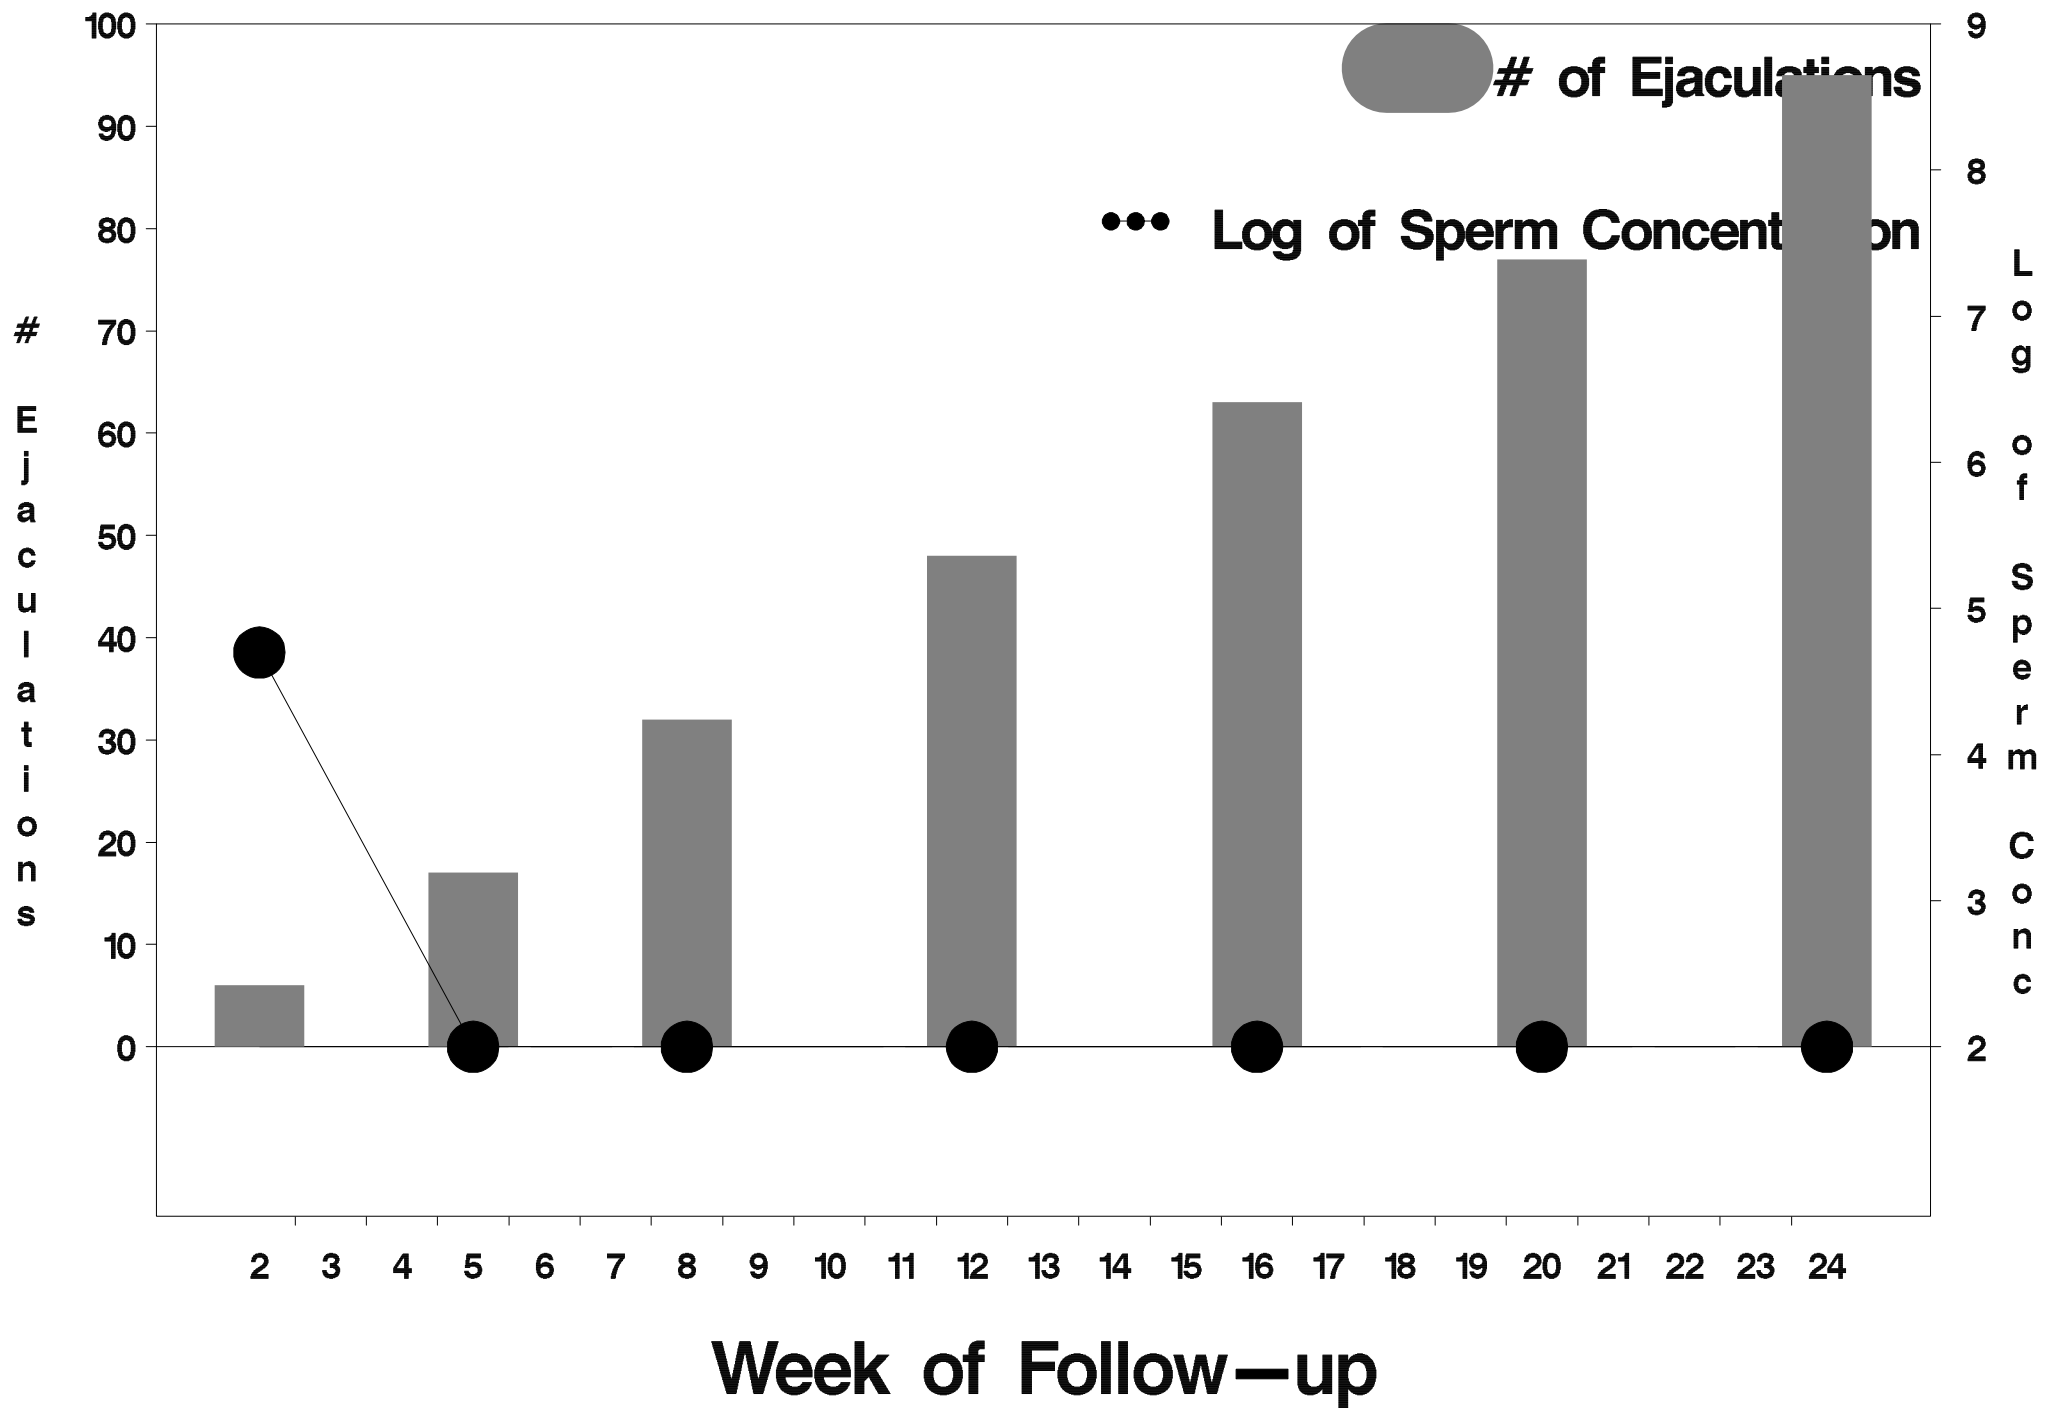

# Participant number= 171

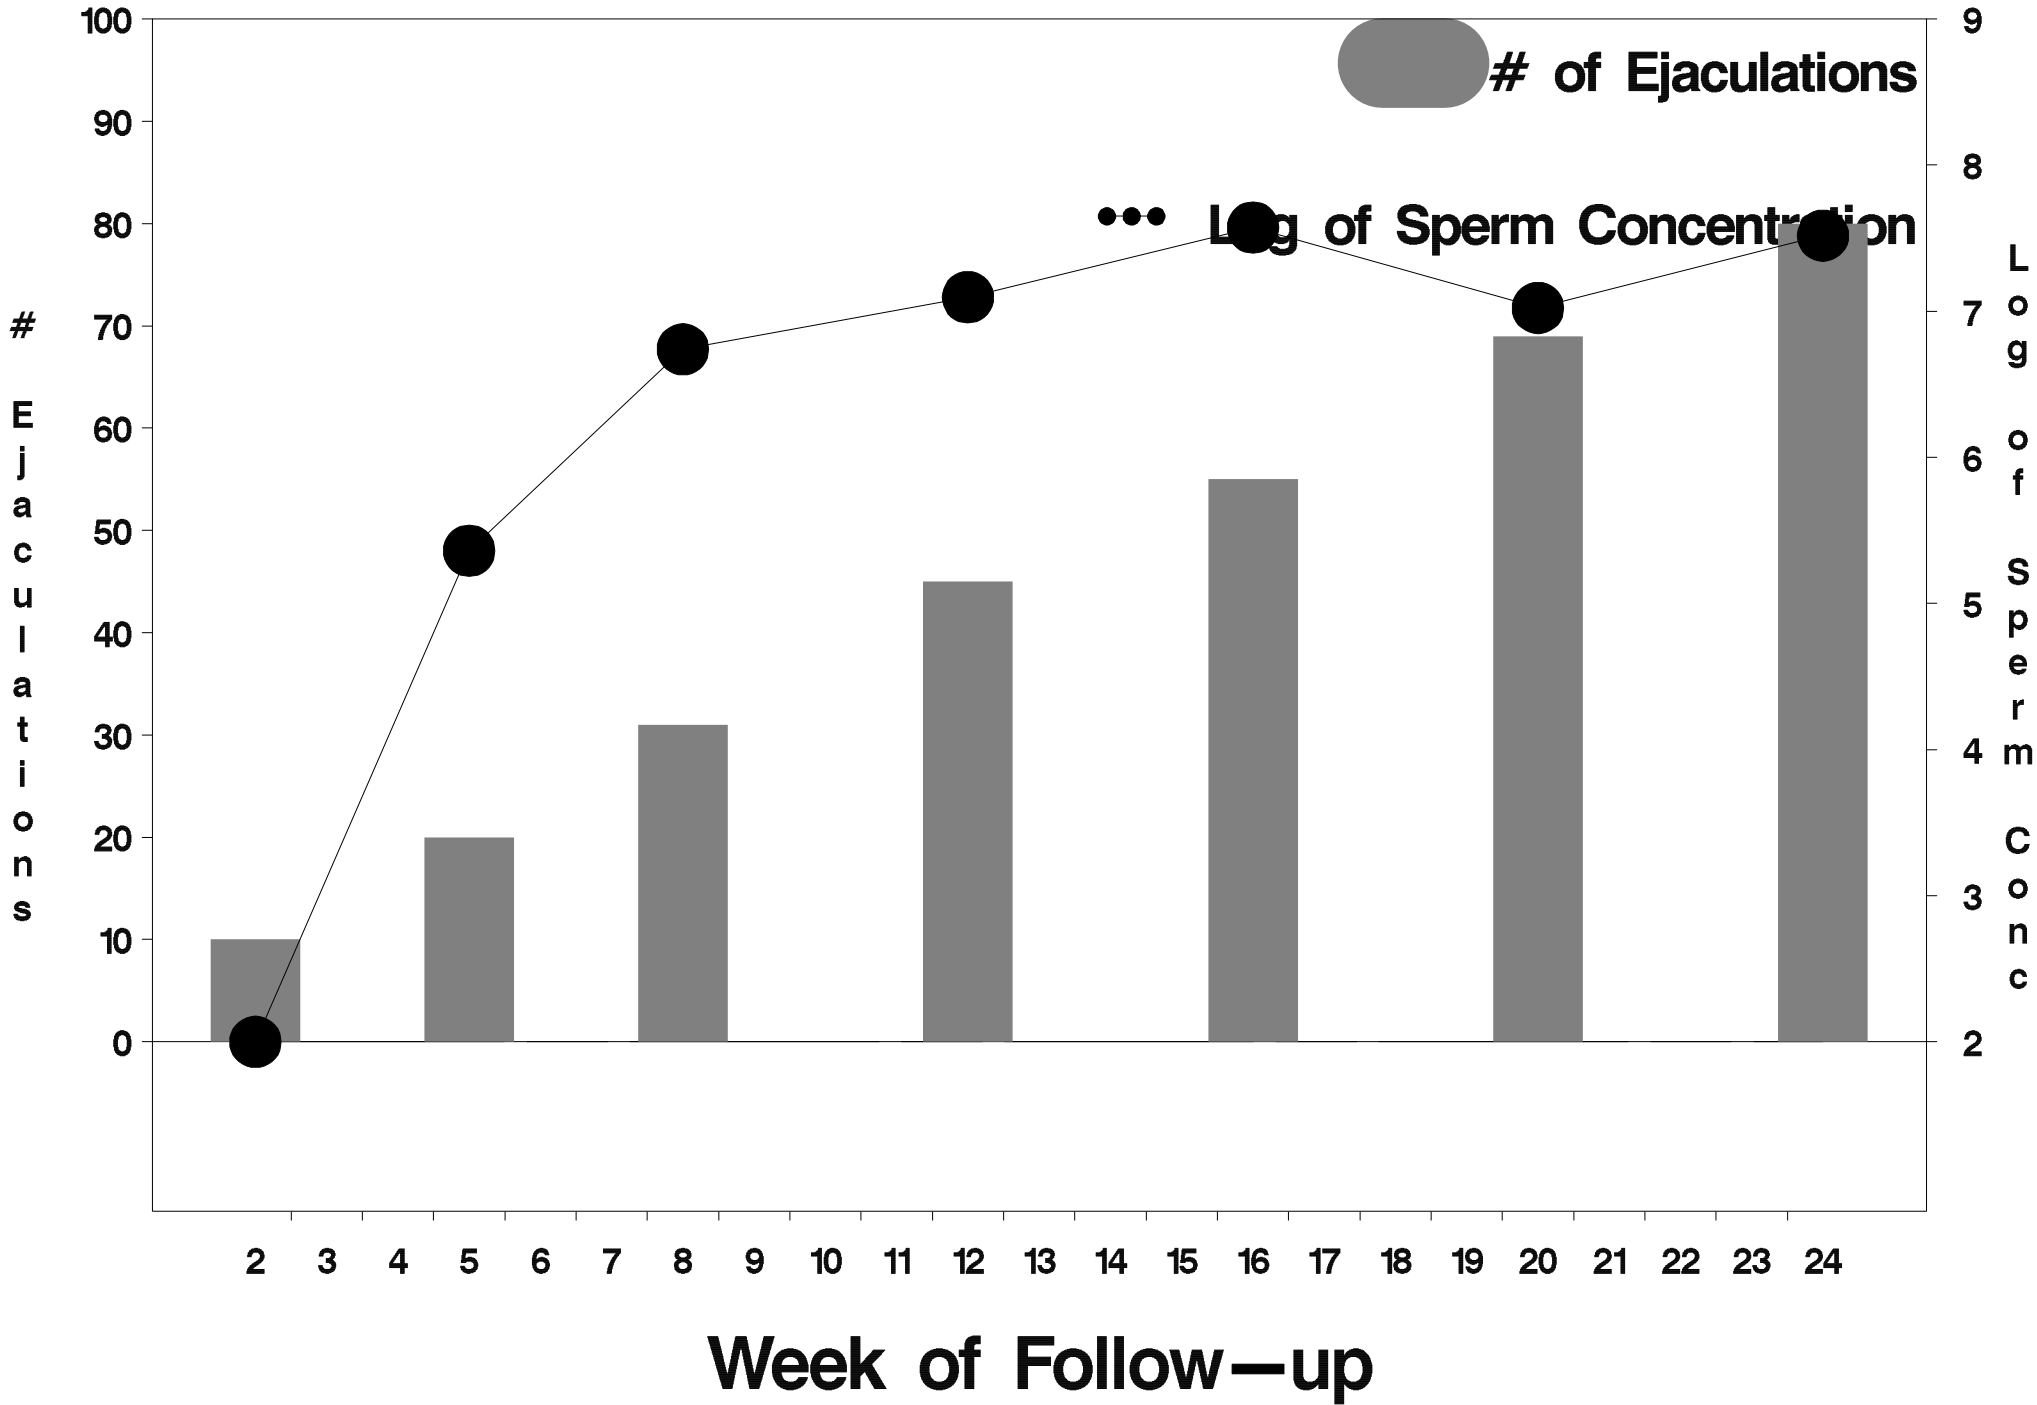

# Participant number= 172

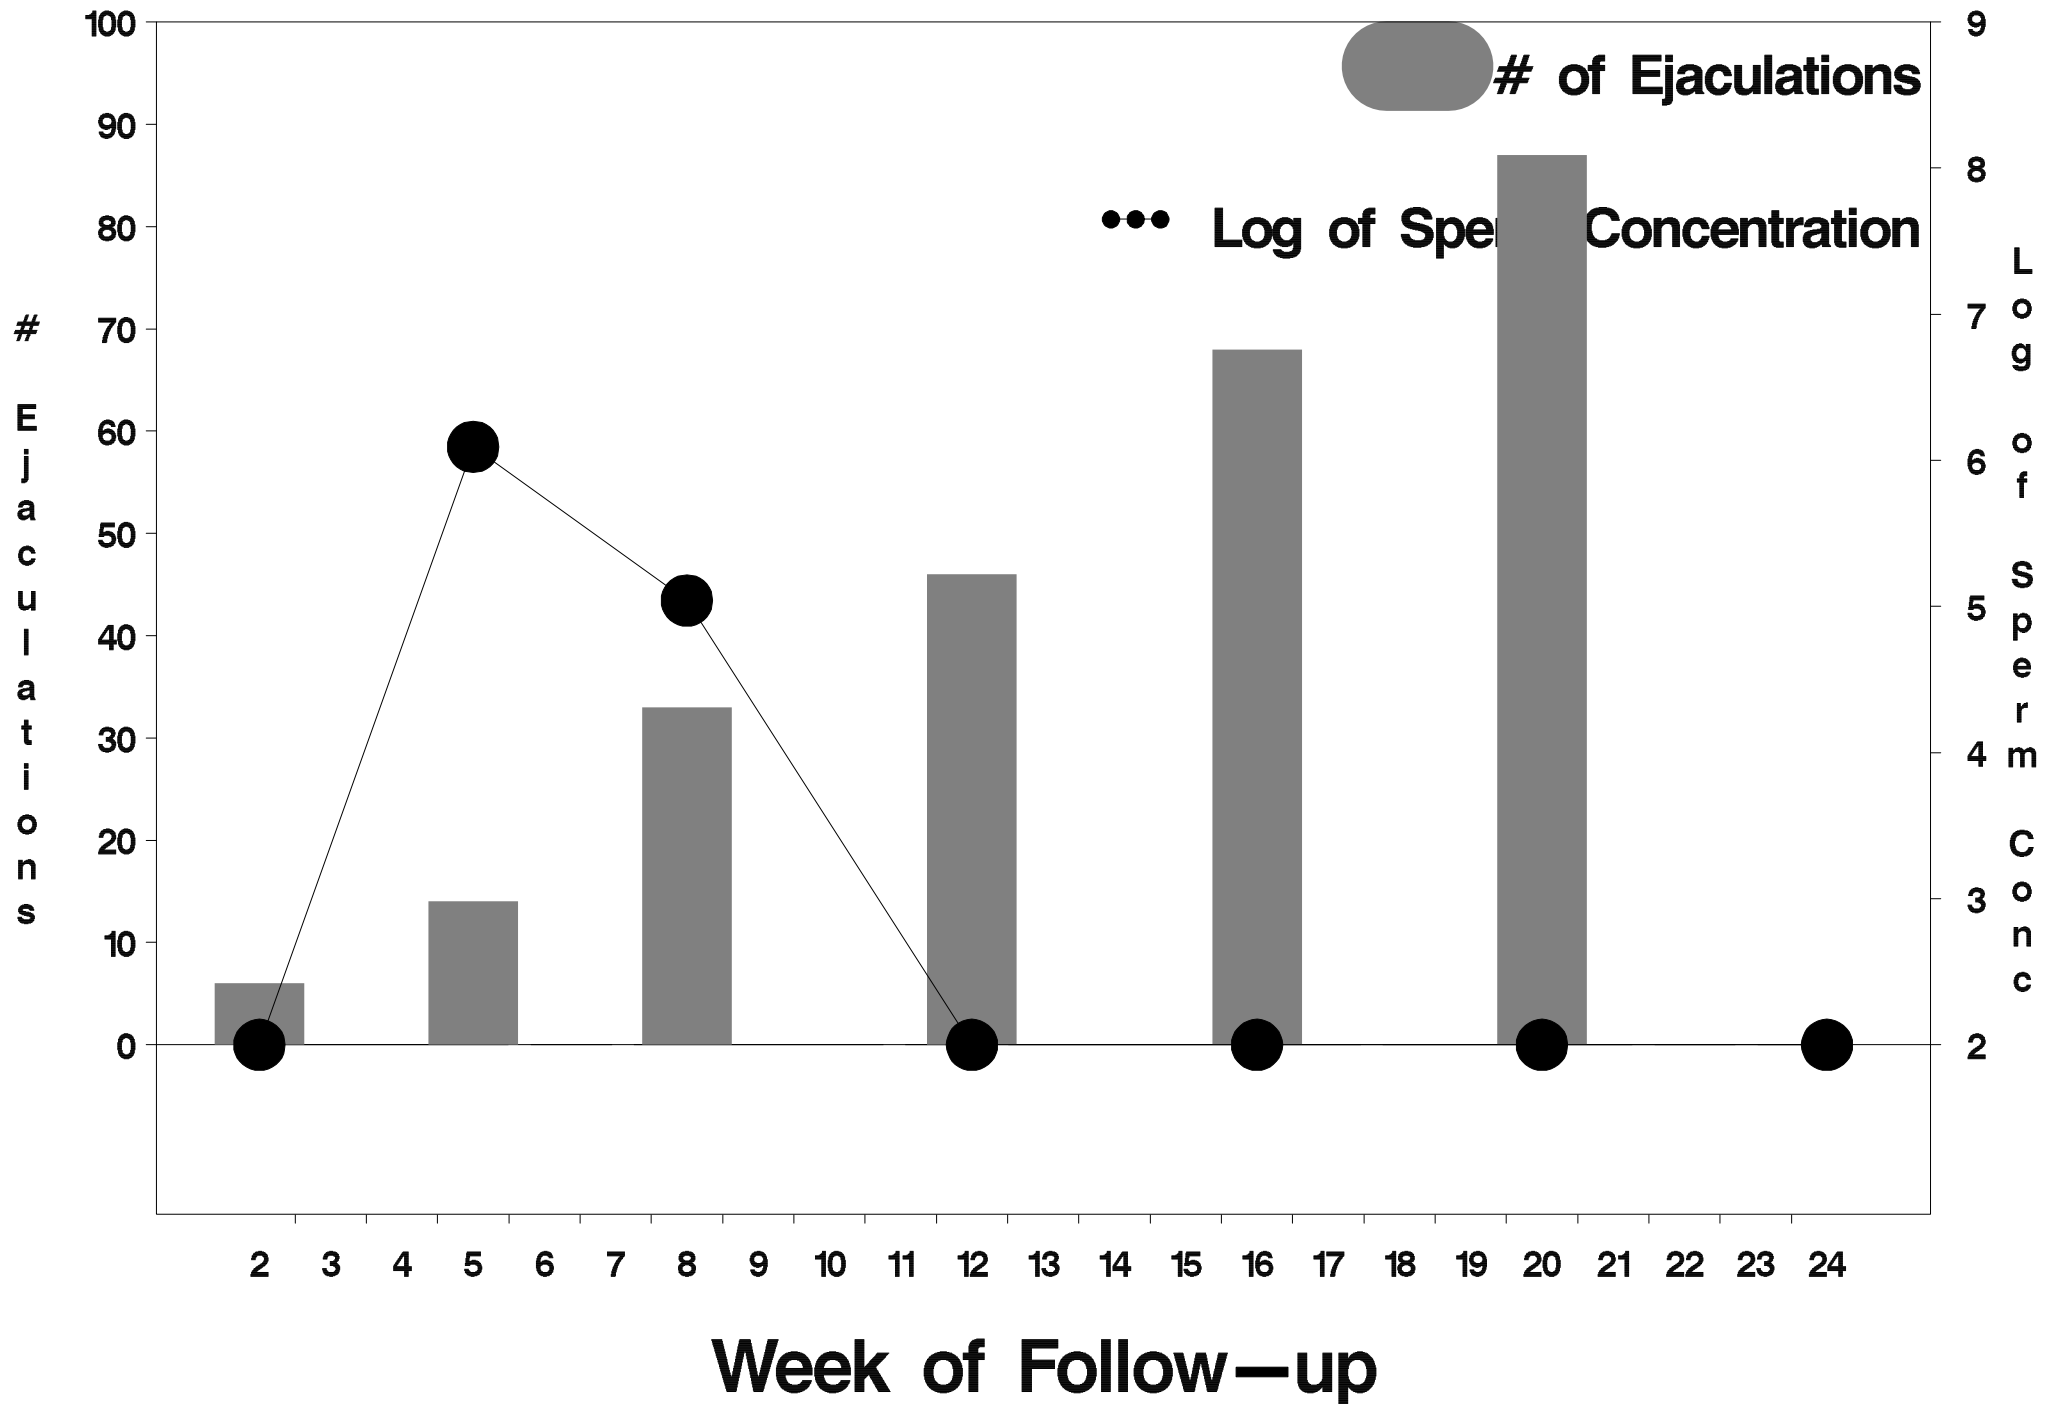



# Participant number= 173

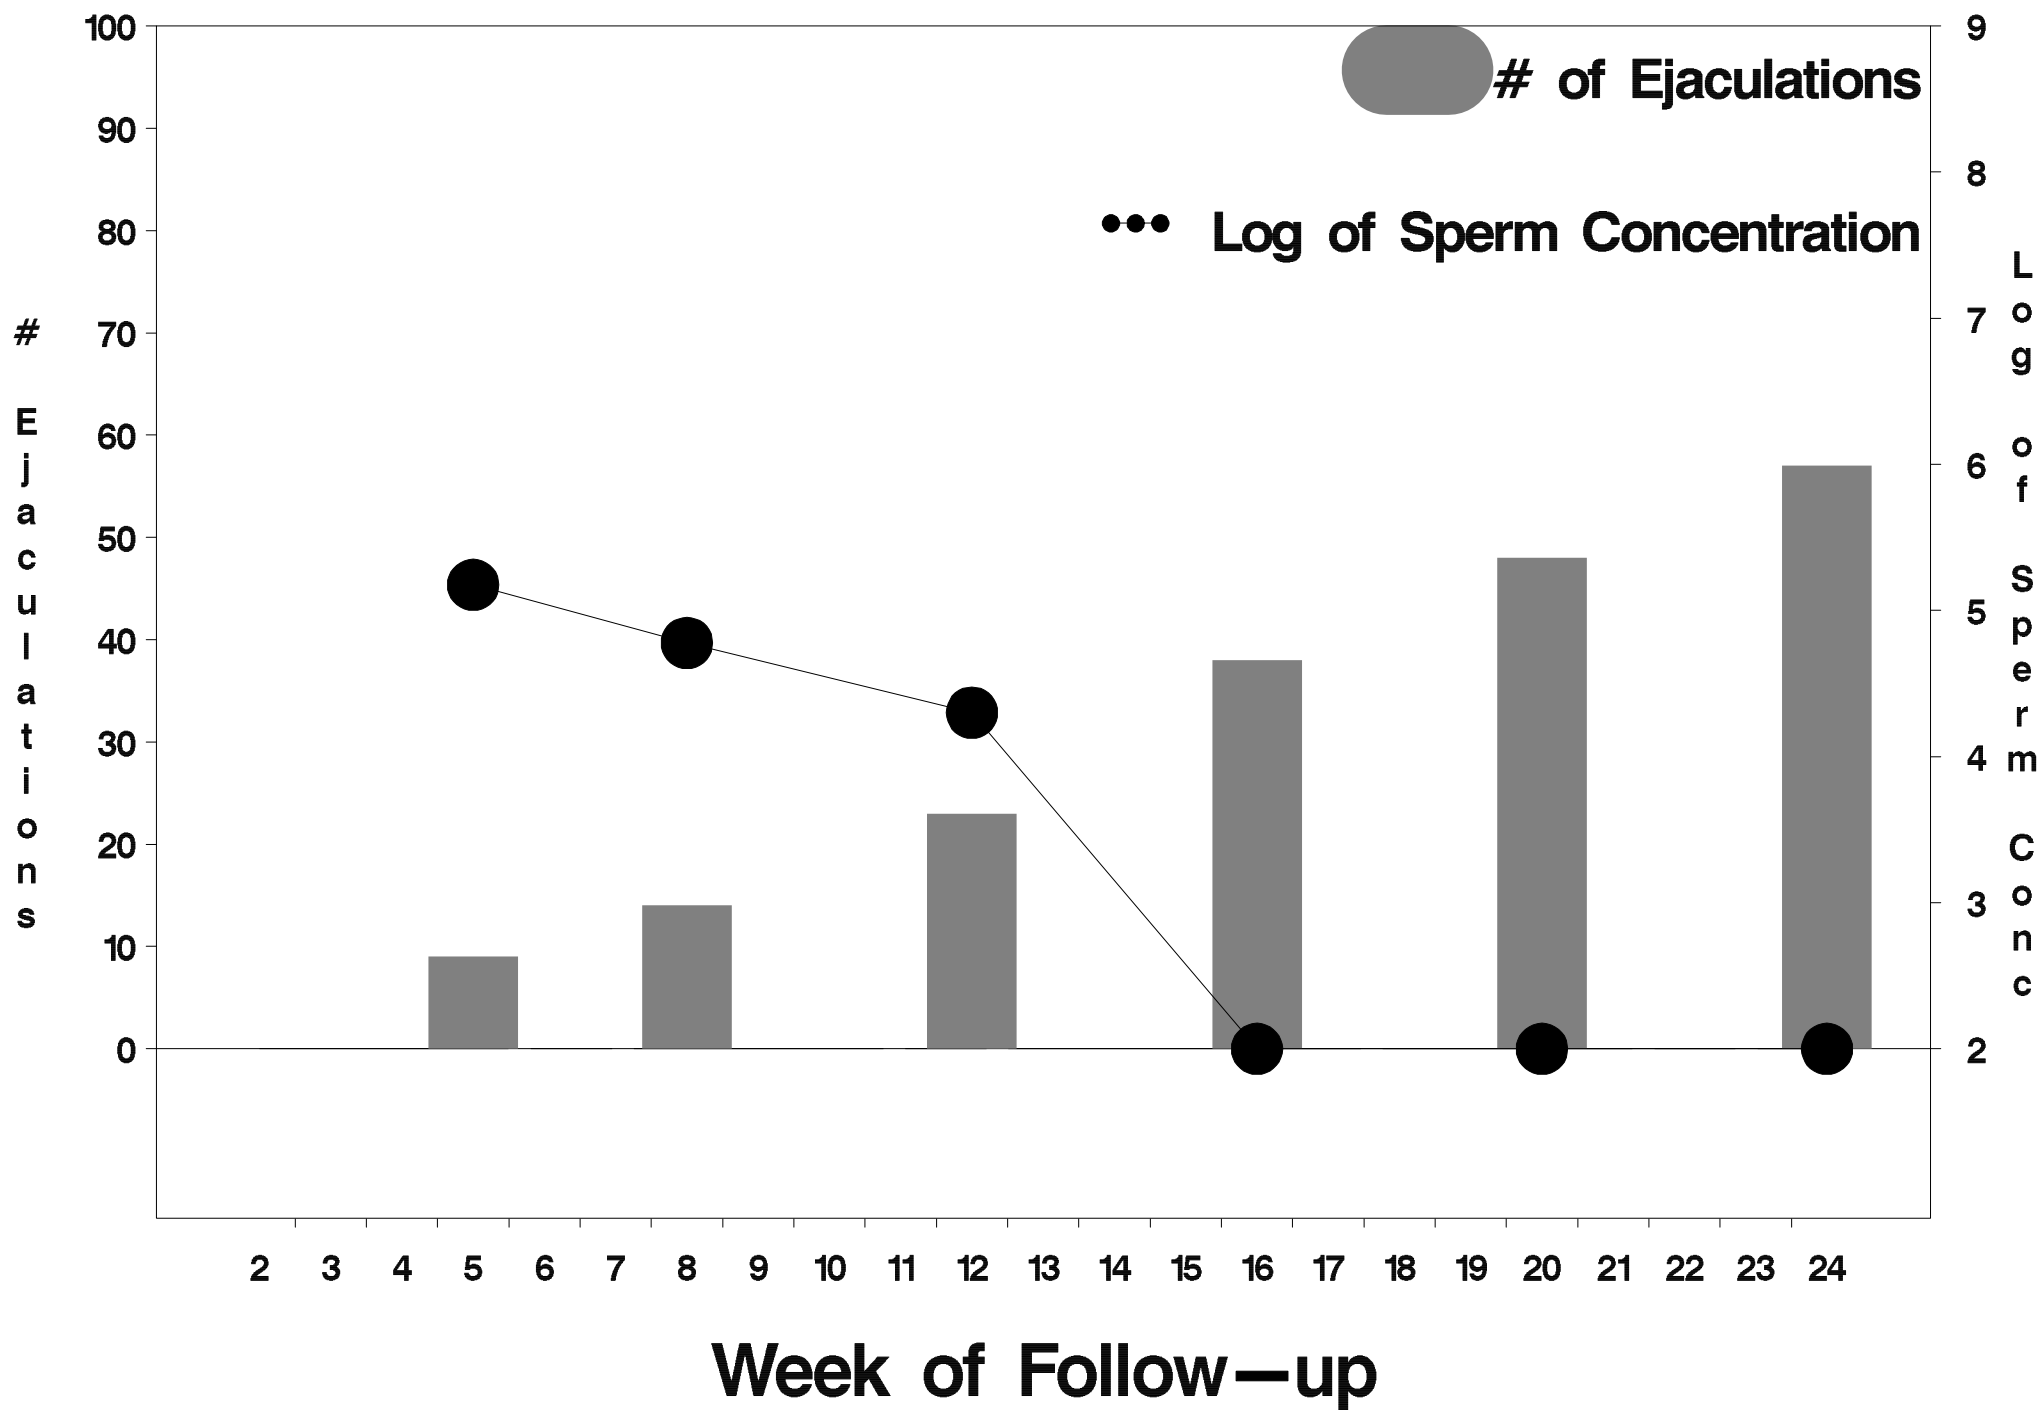

# Participant number= 174

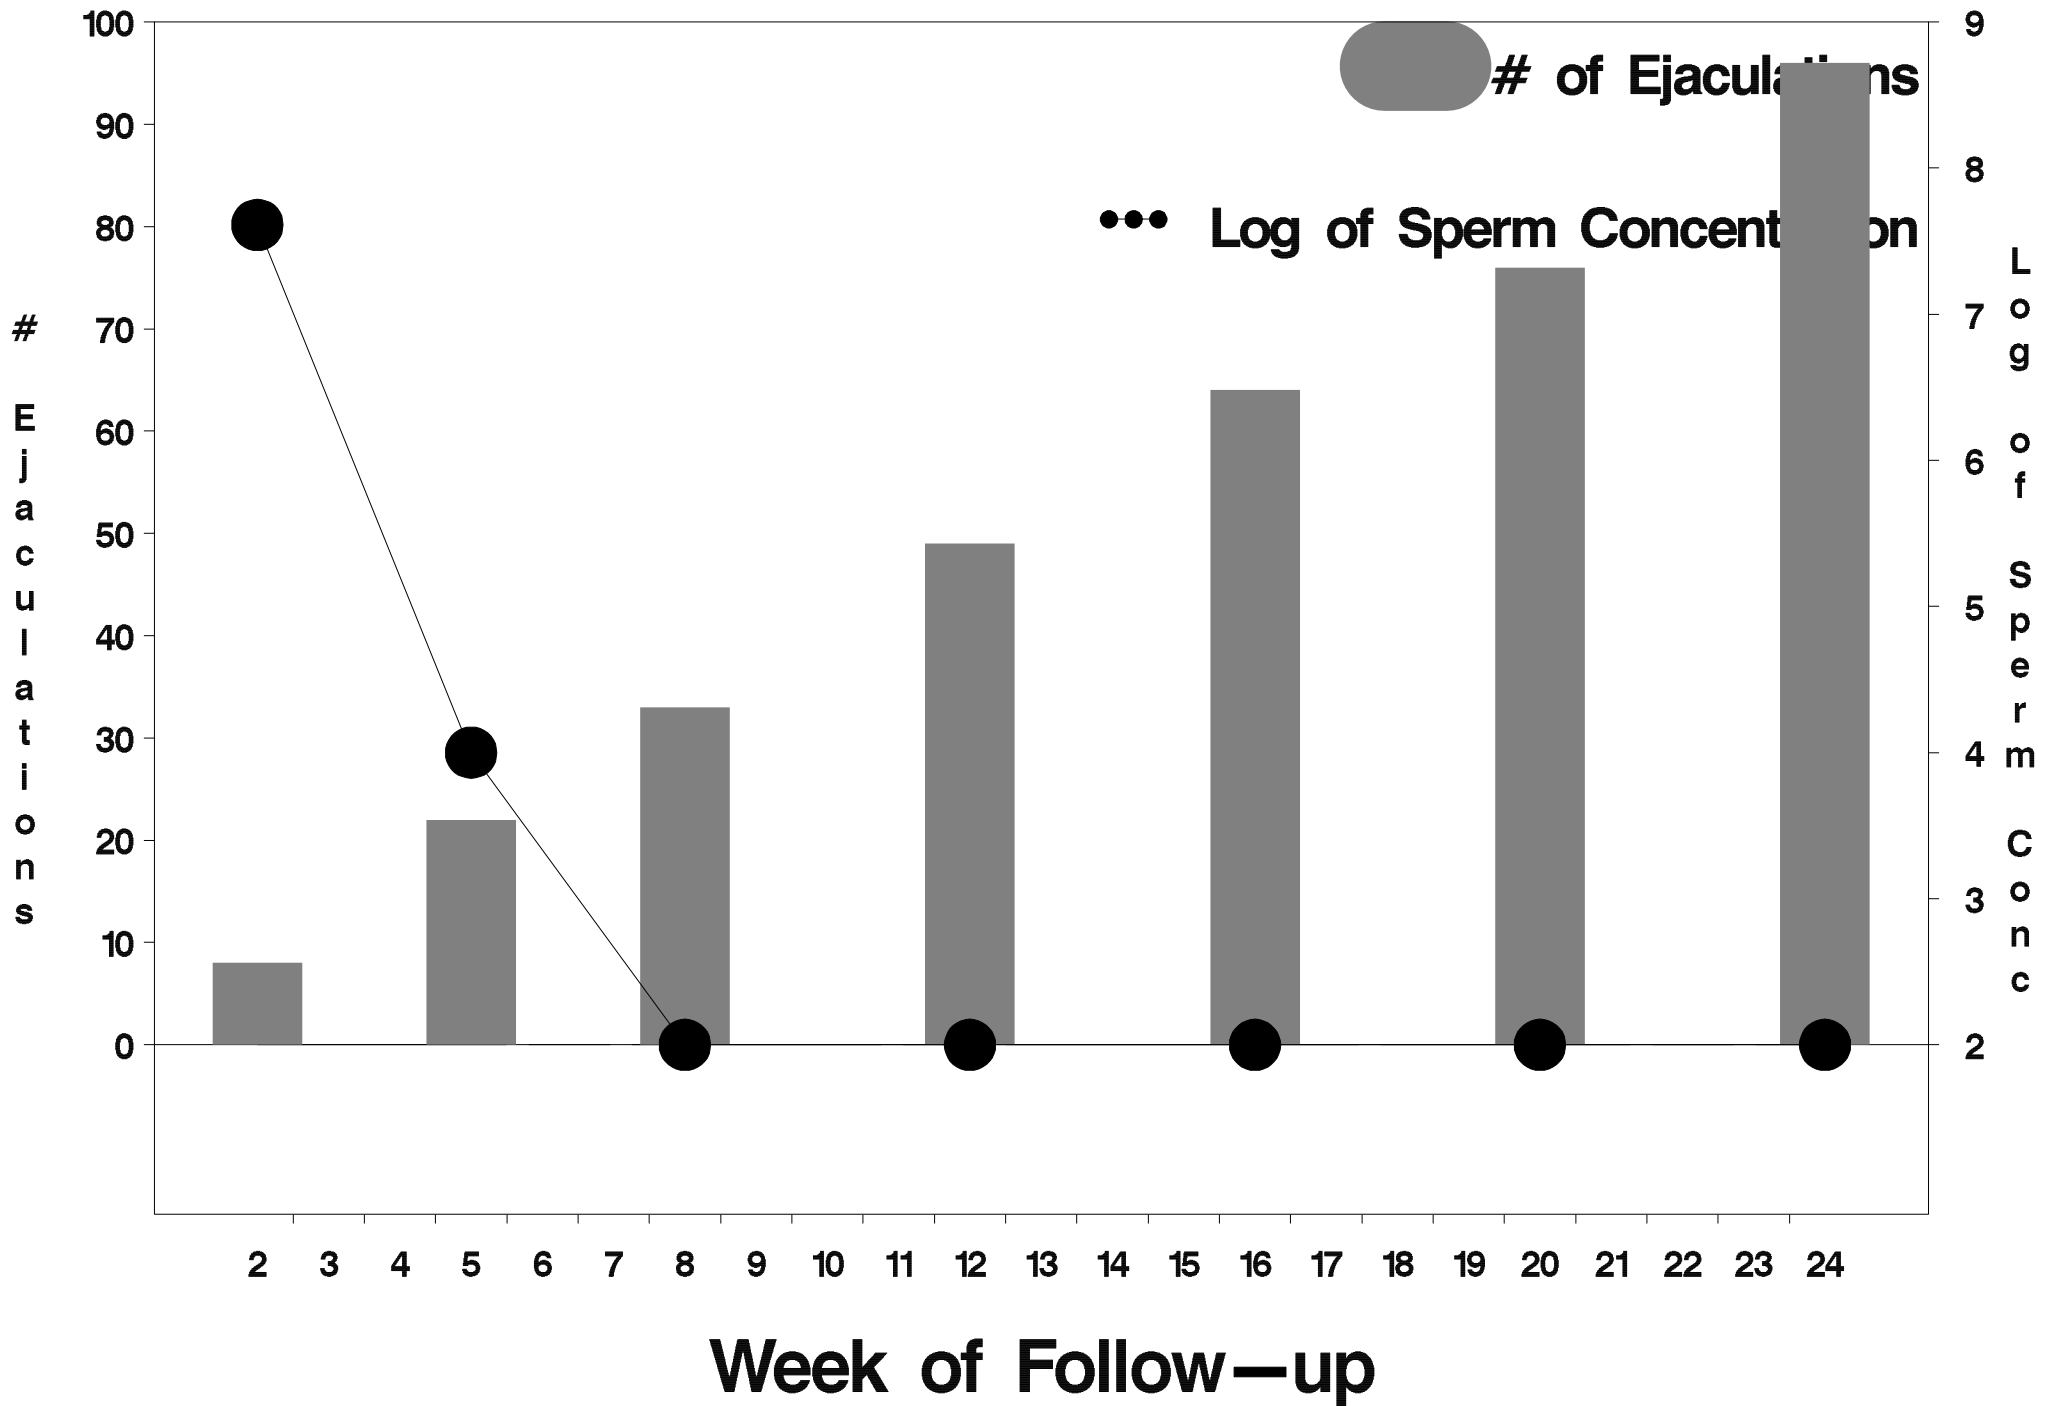

# Participant number= 175

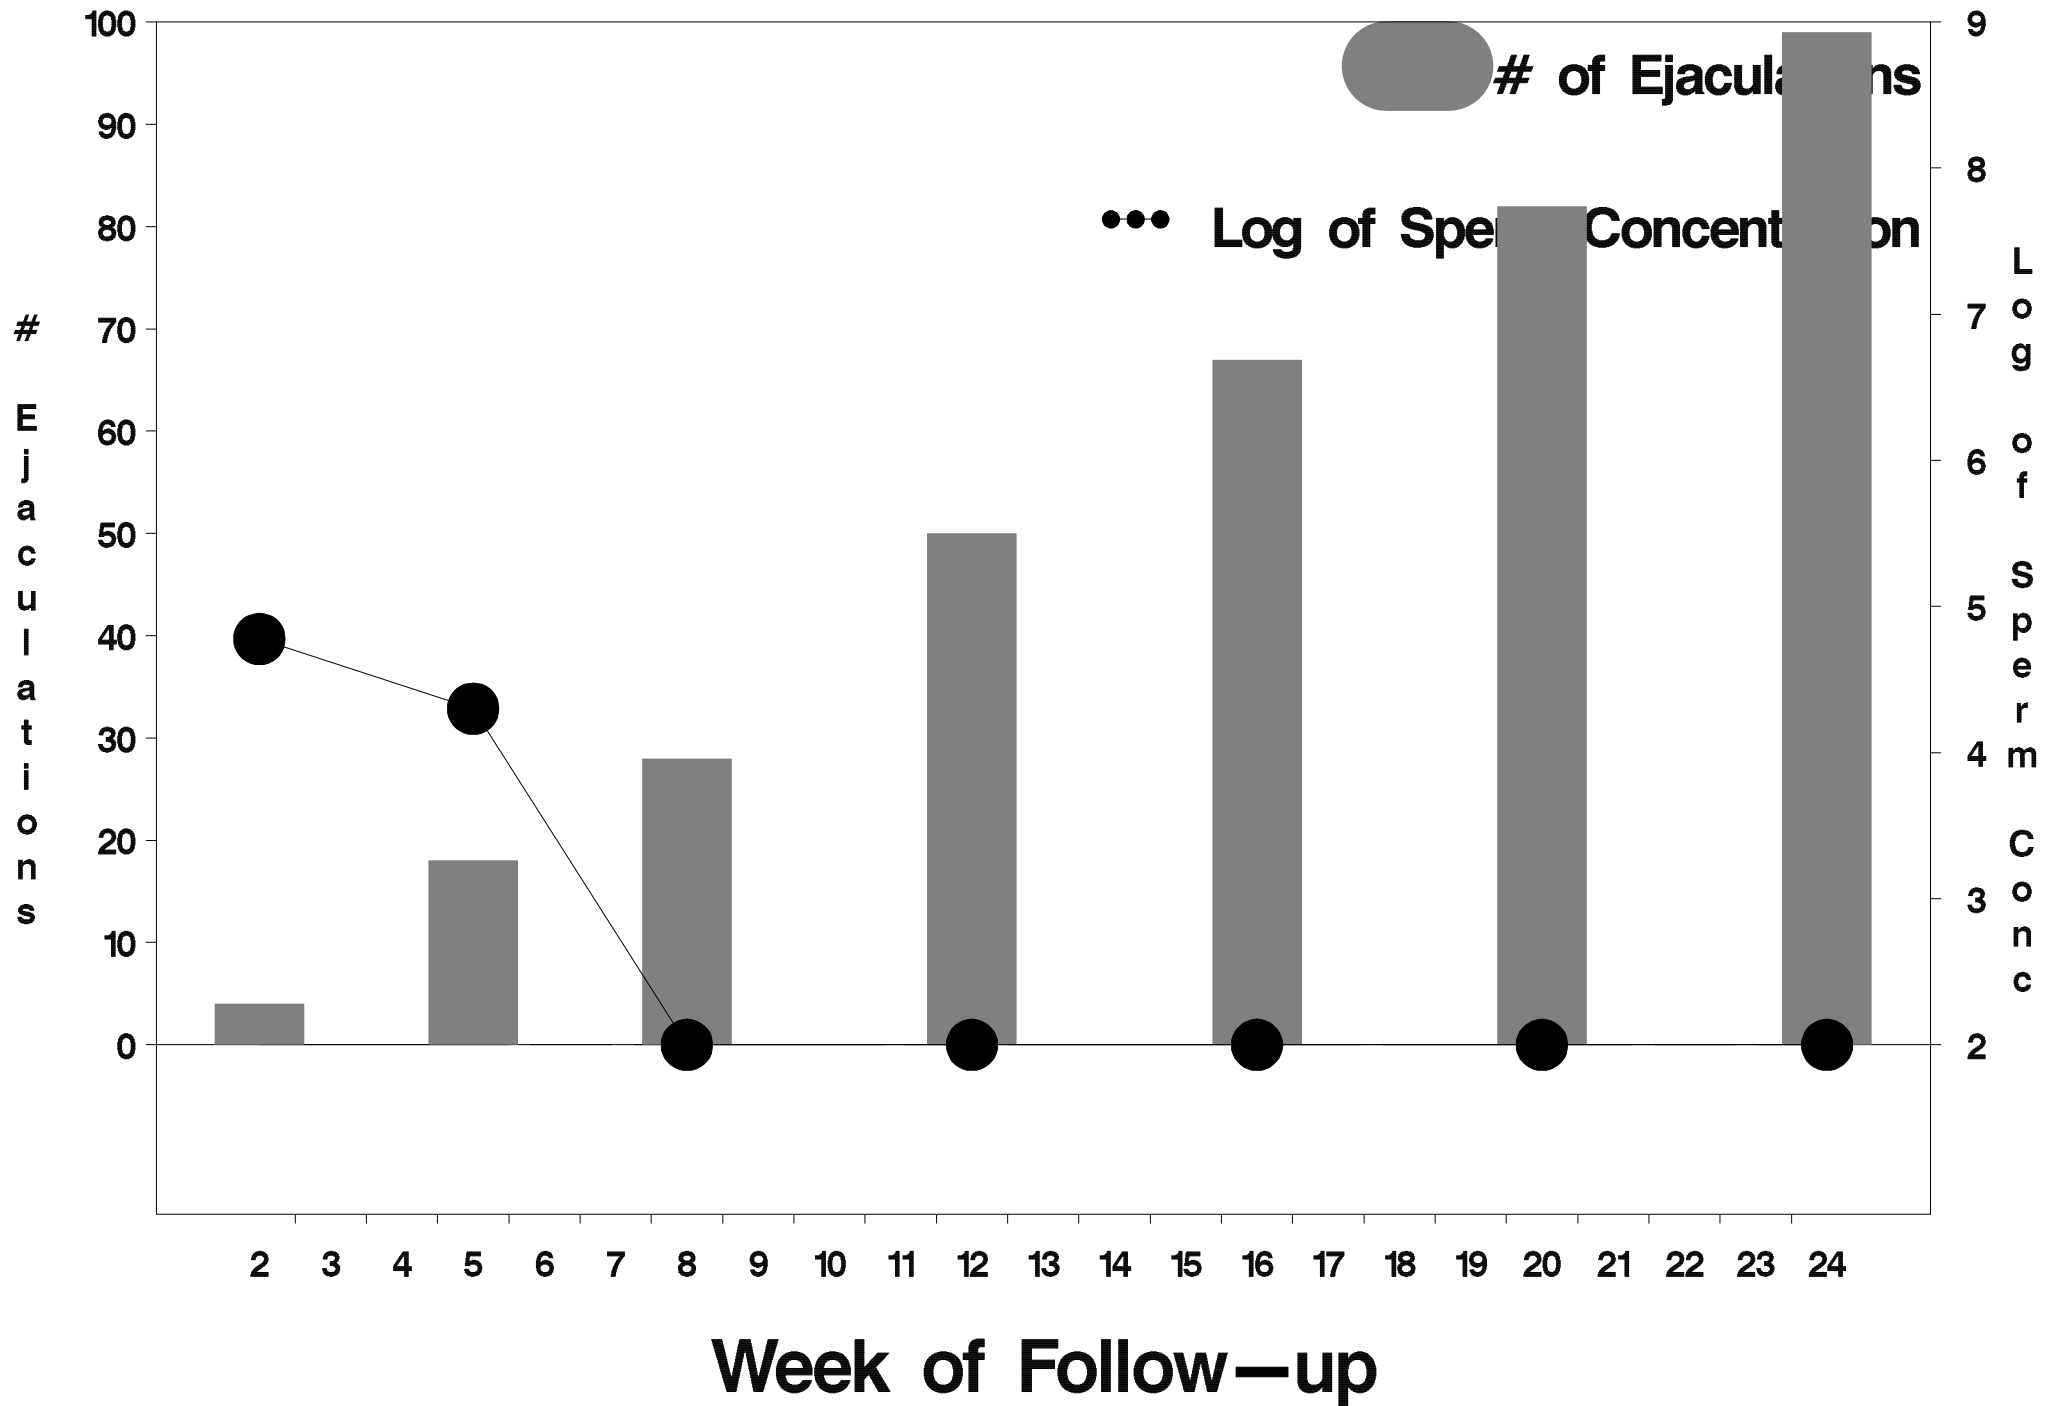

# Participant number= 176

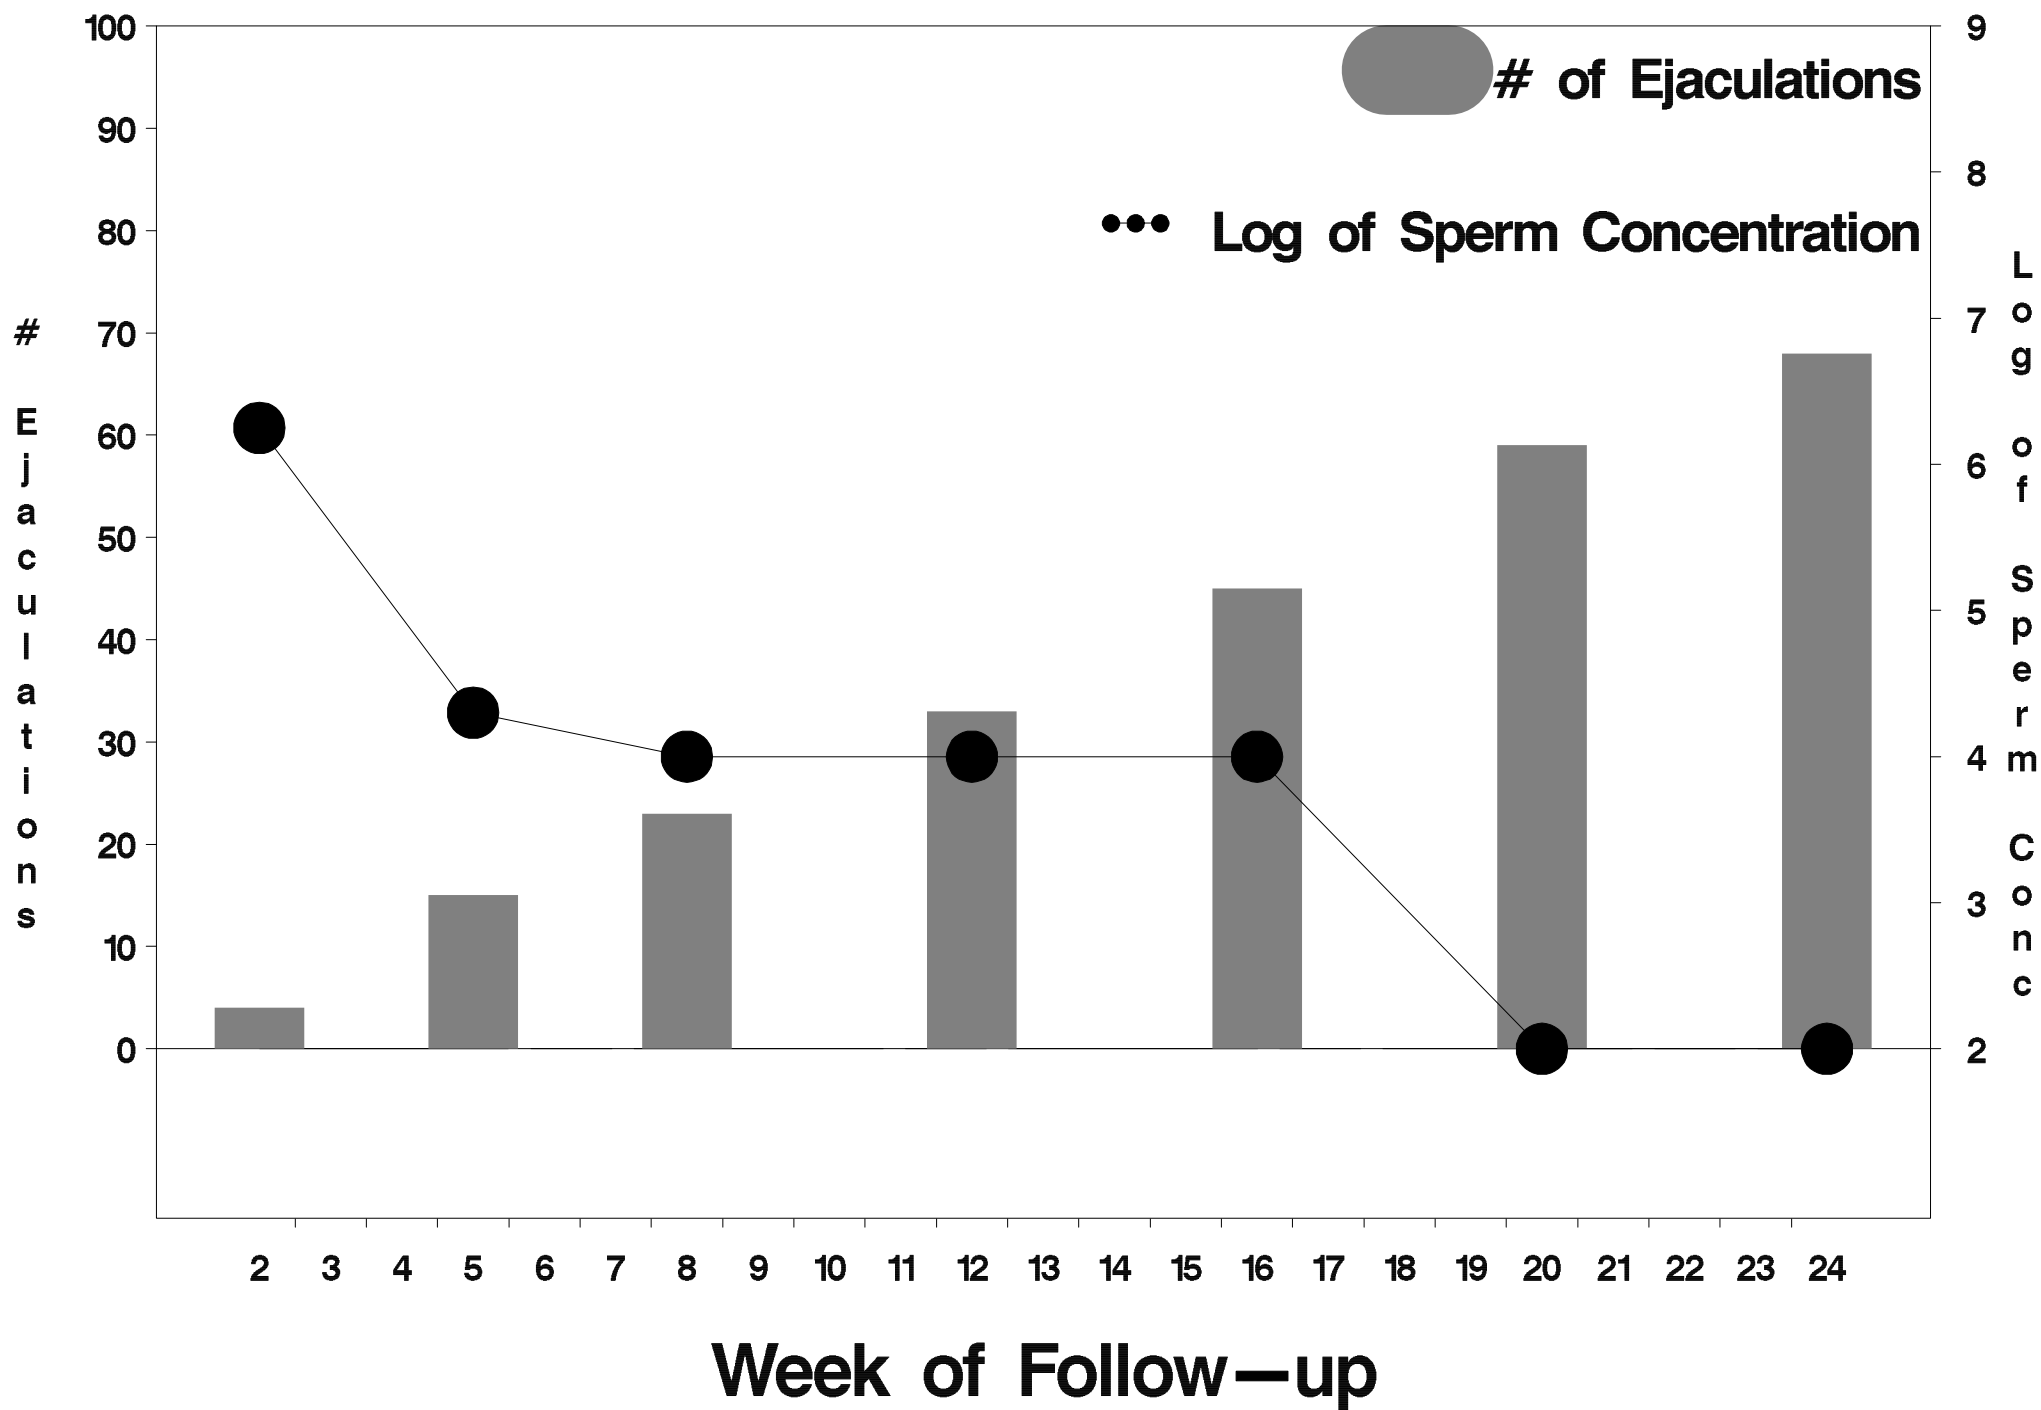

# Participant number= 177

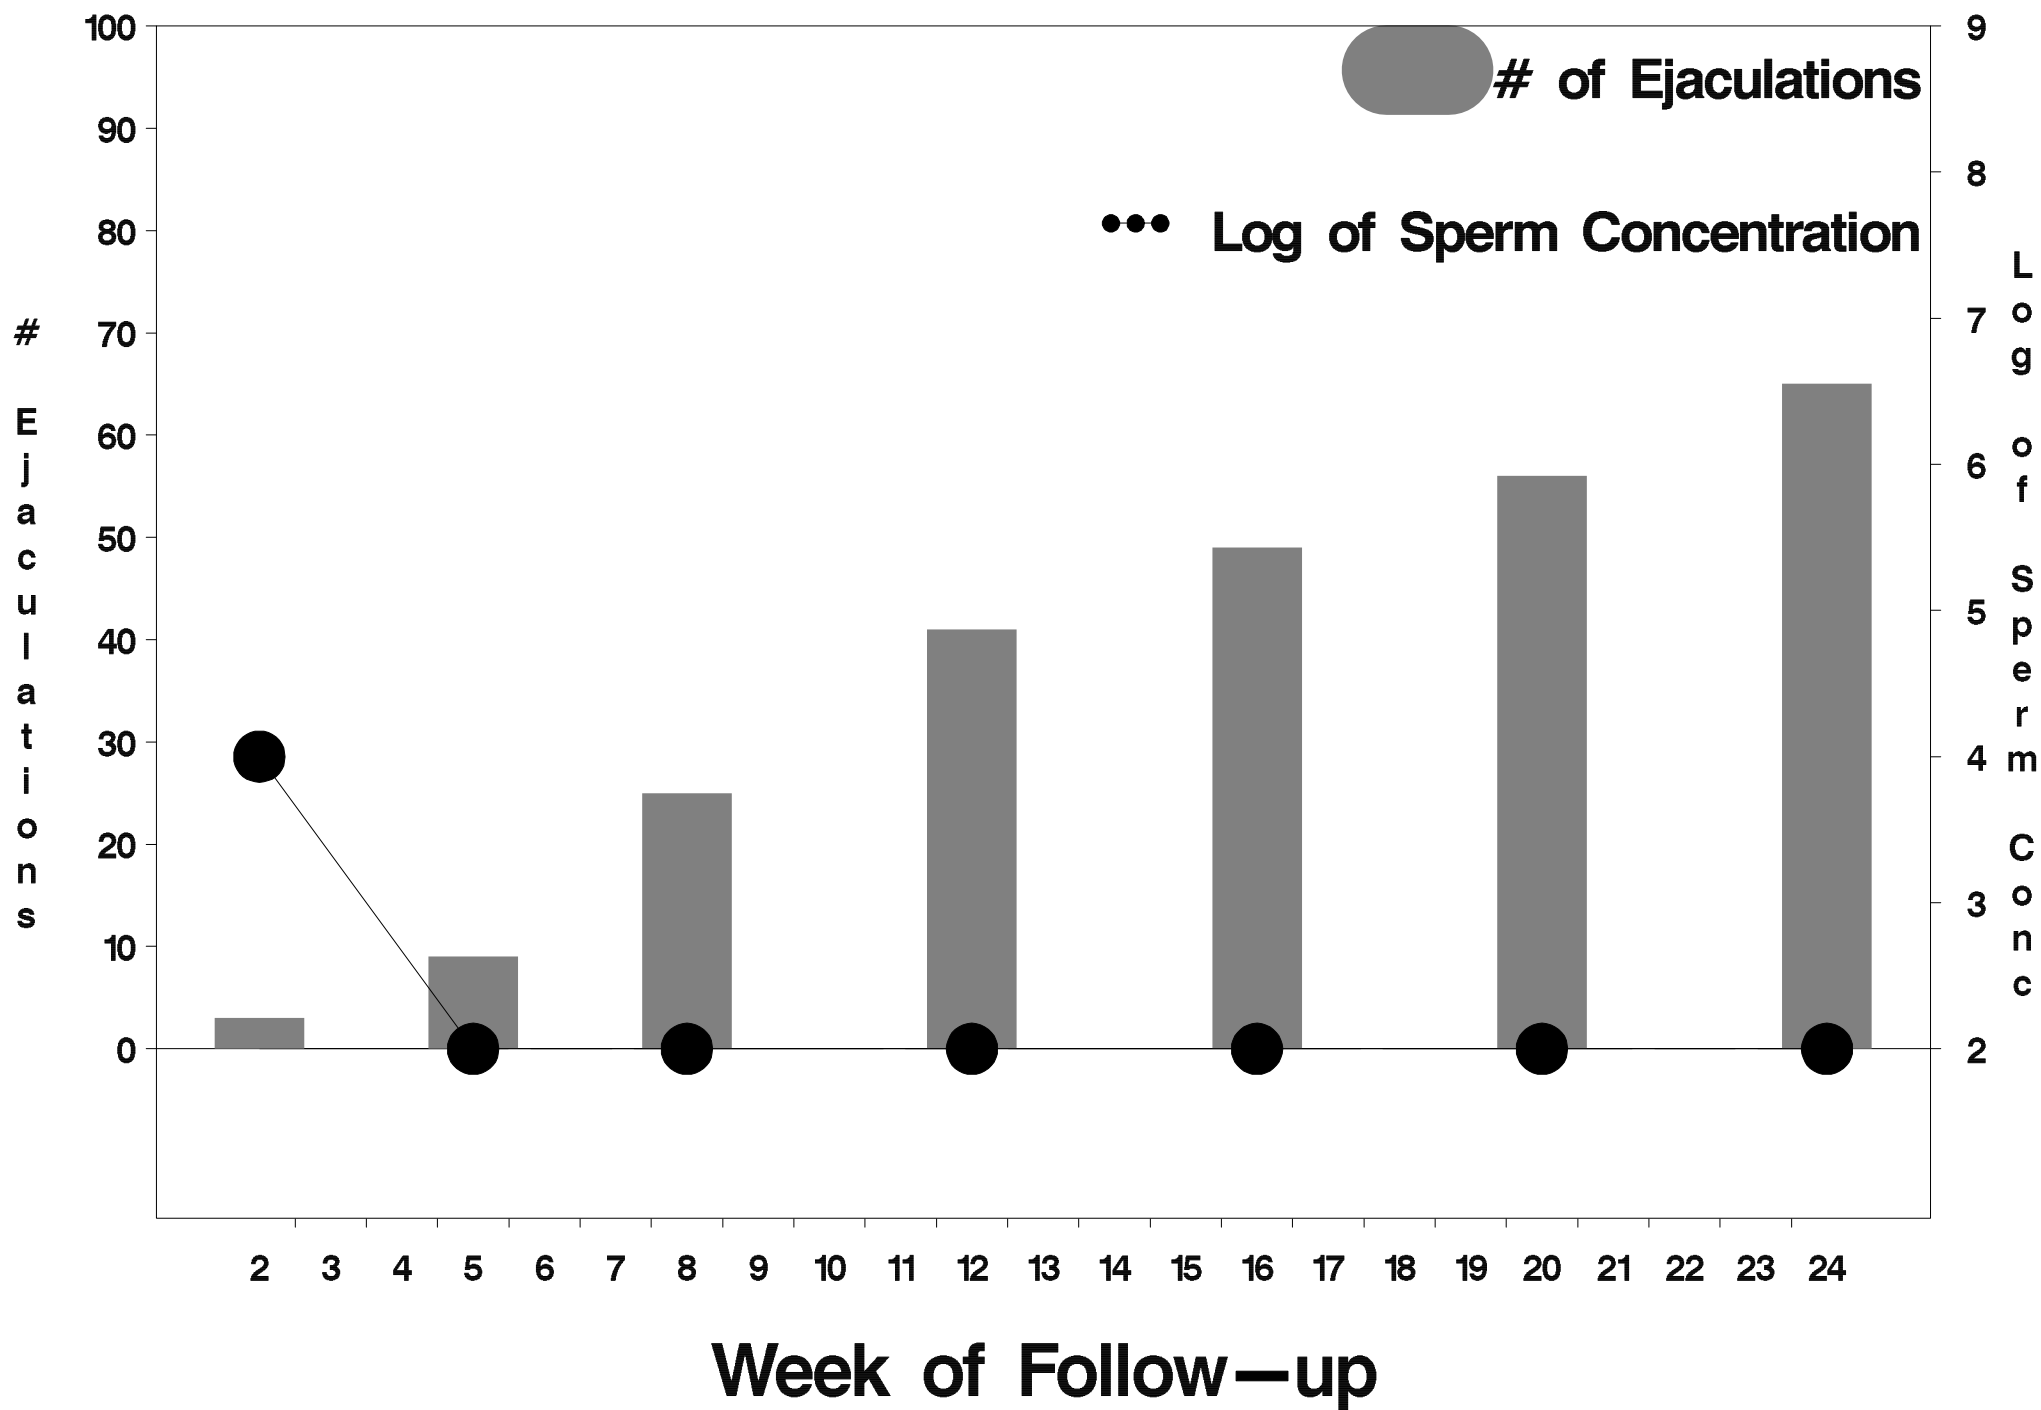

# Participant number= 178

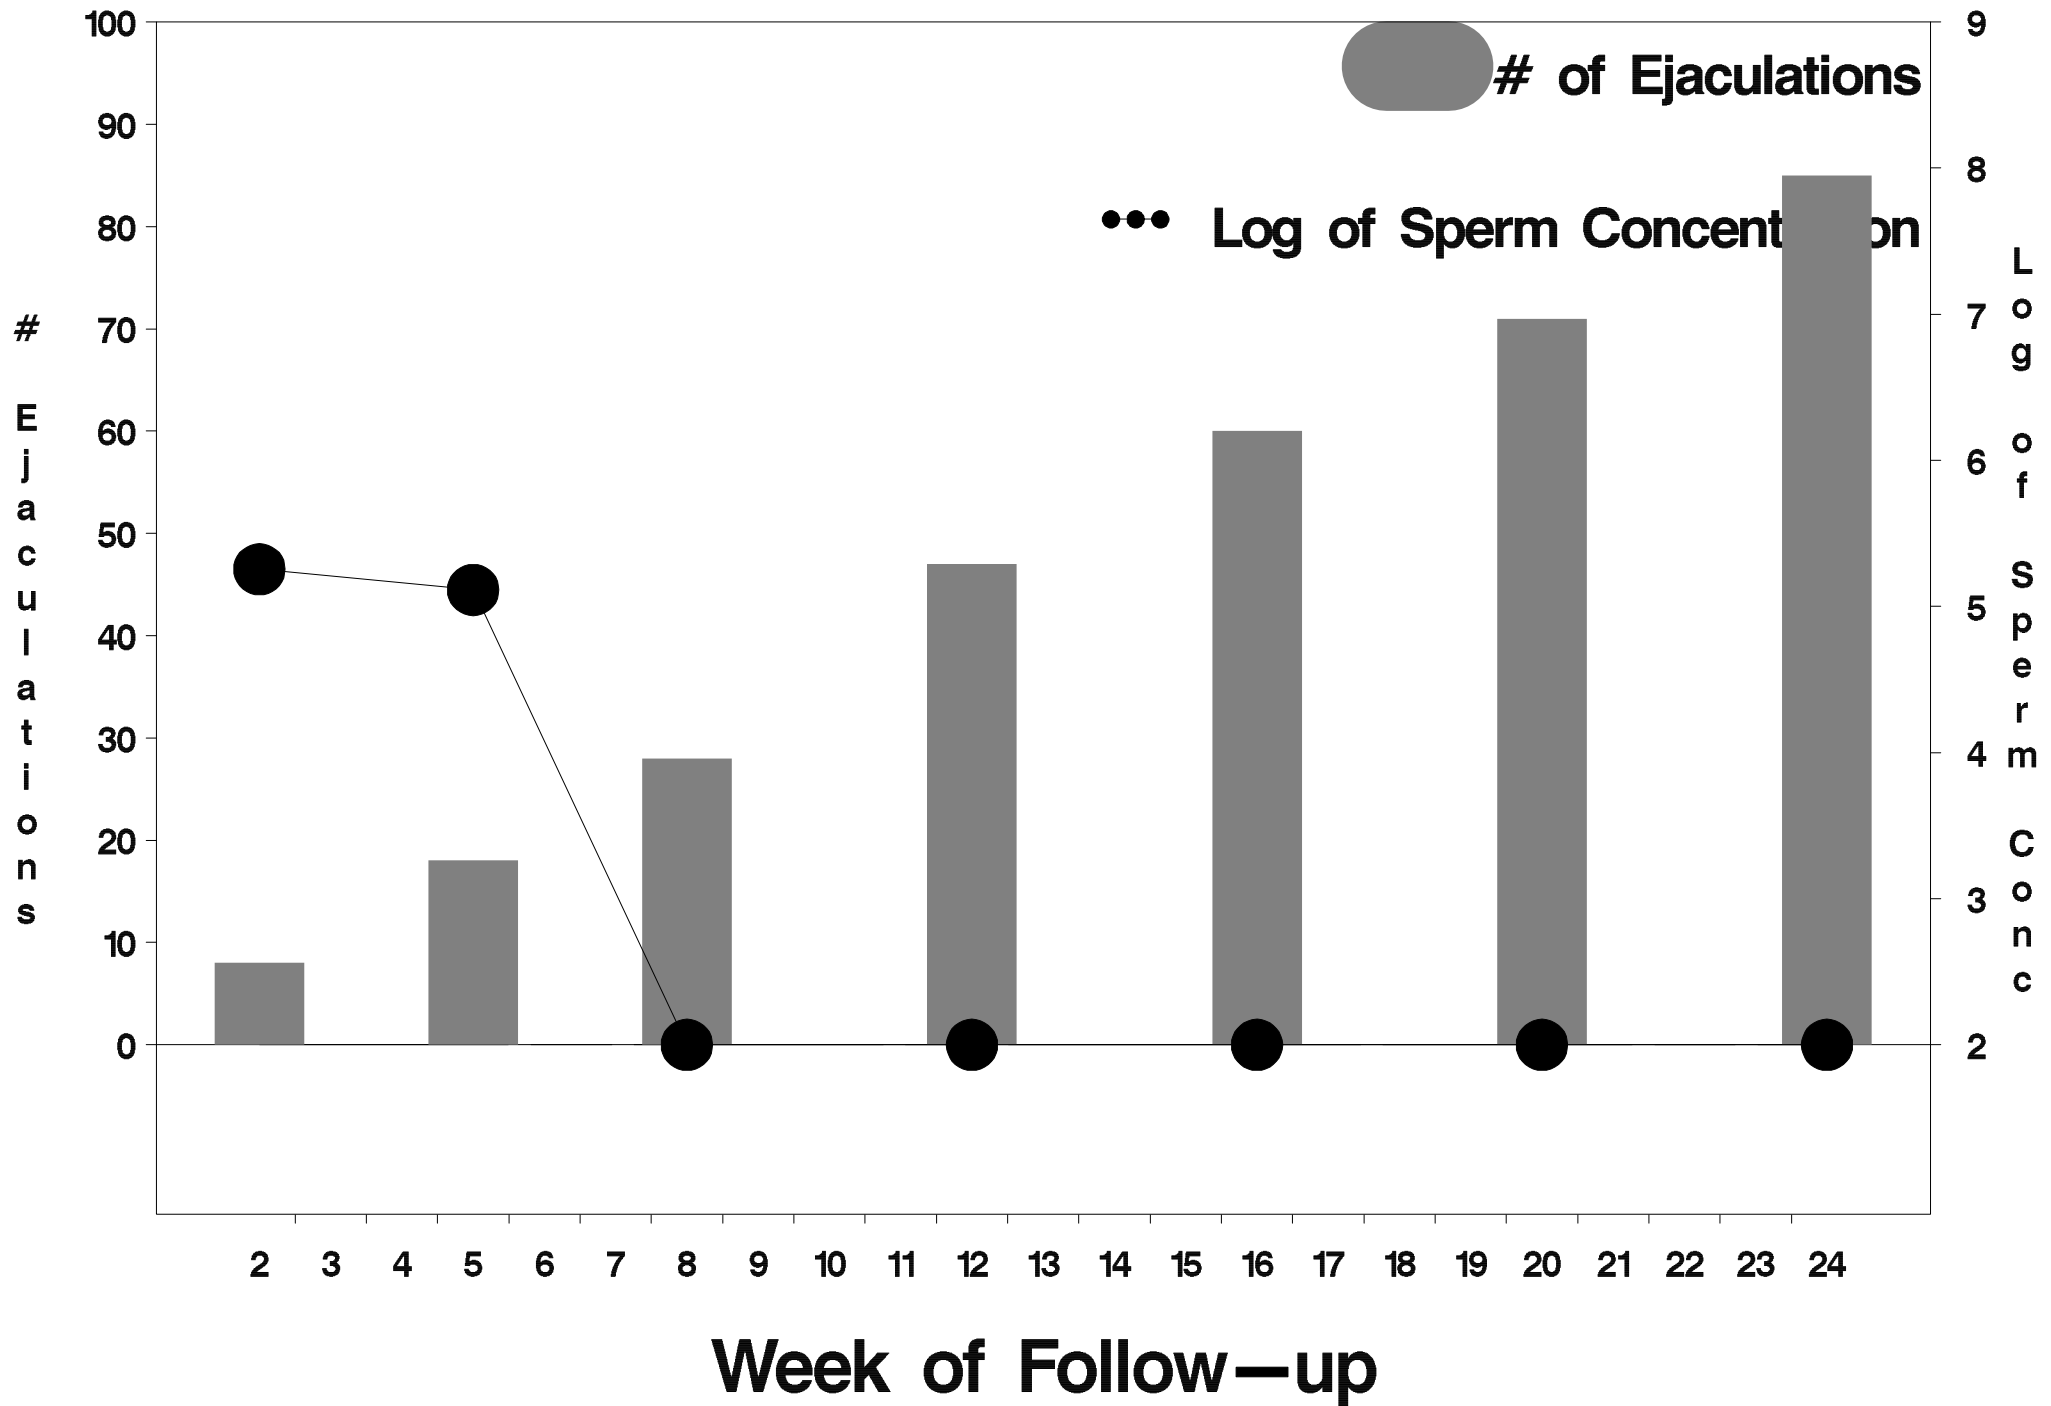

# Participant number= 179

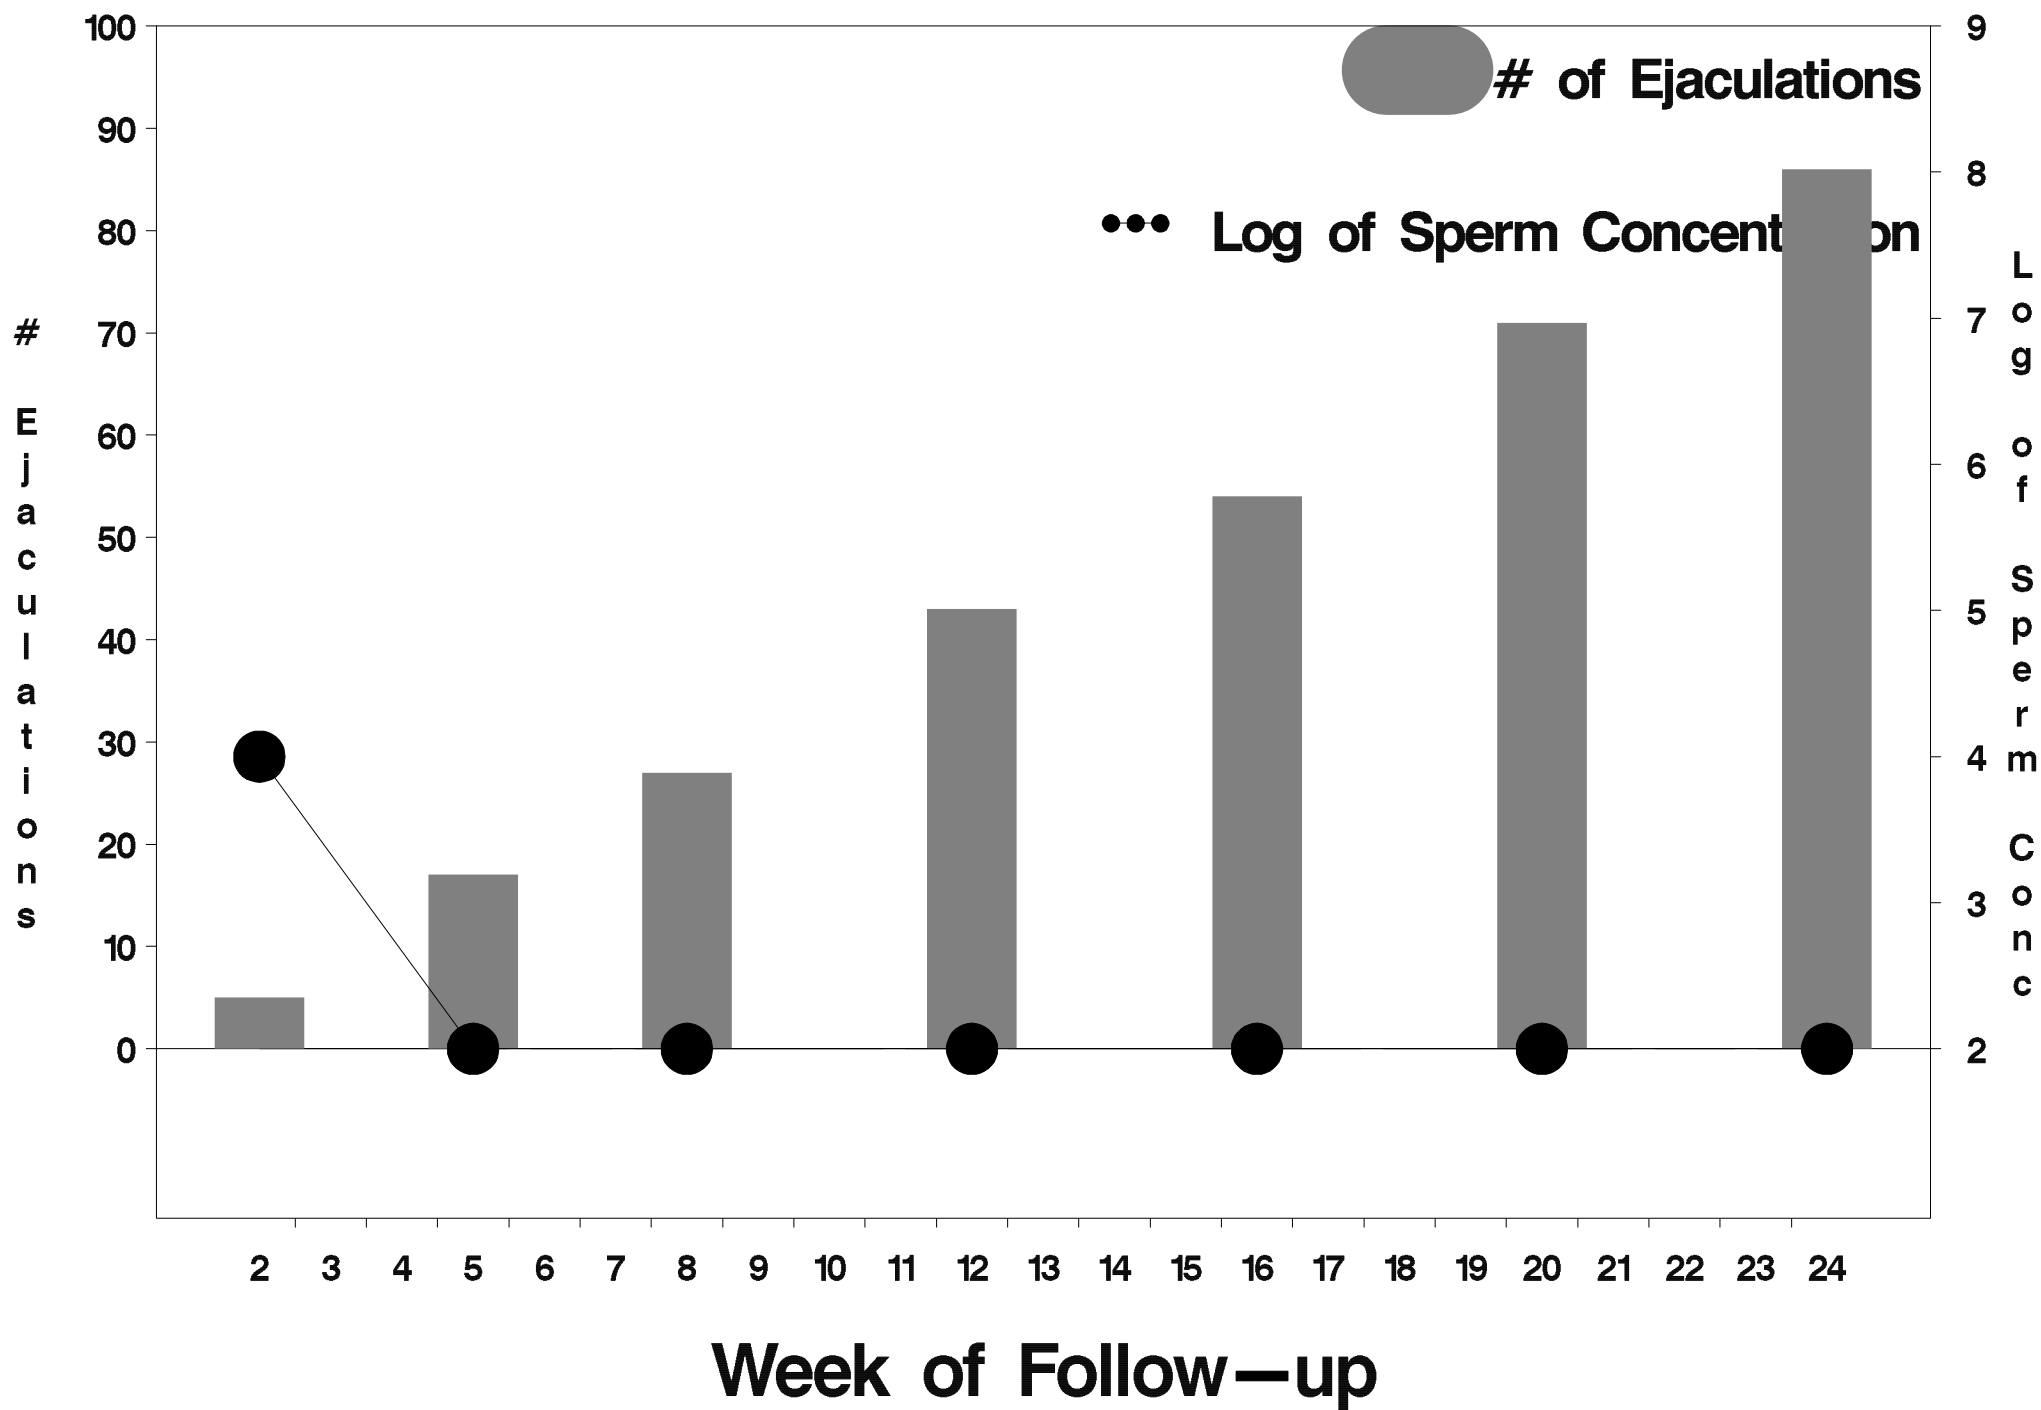

# Participant number= 180

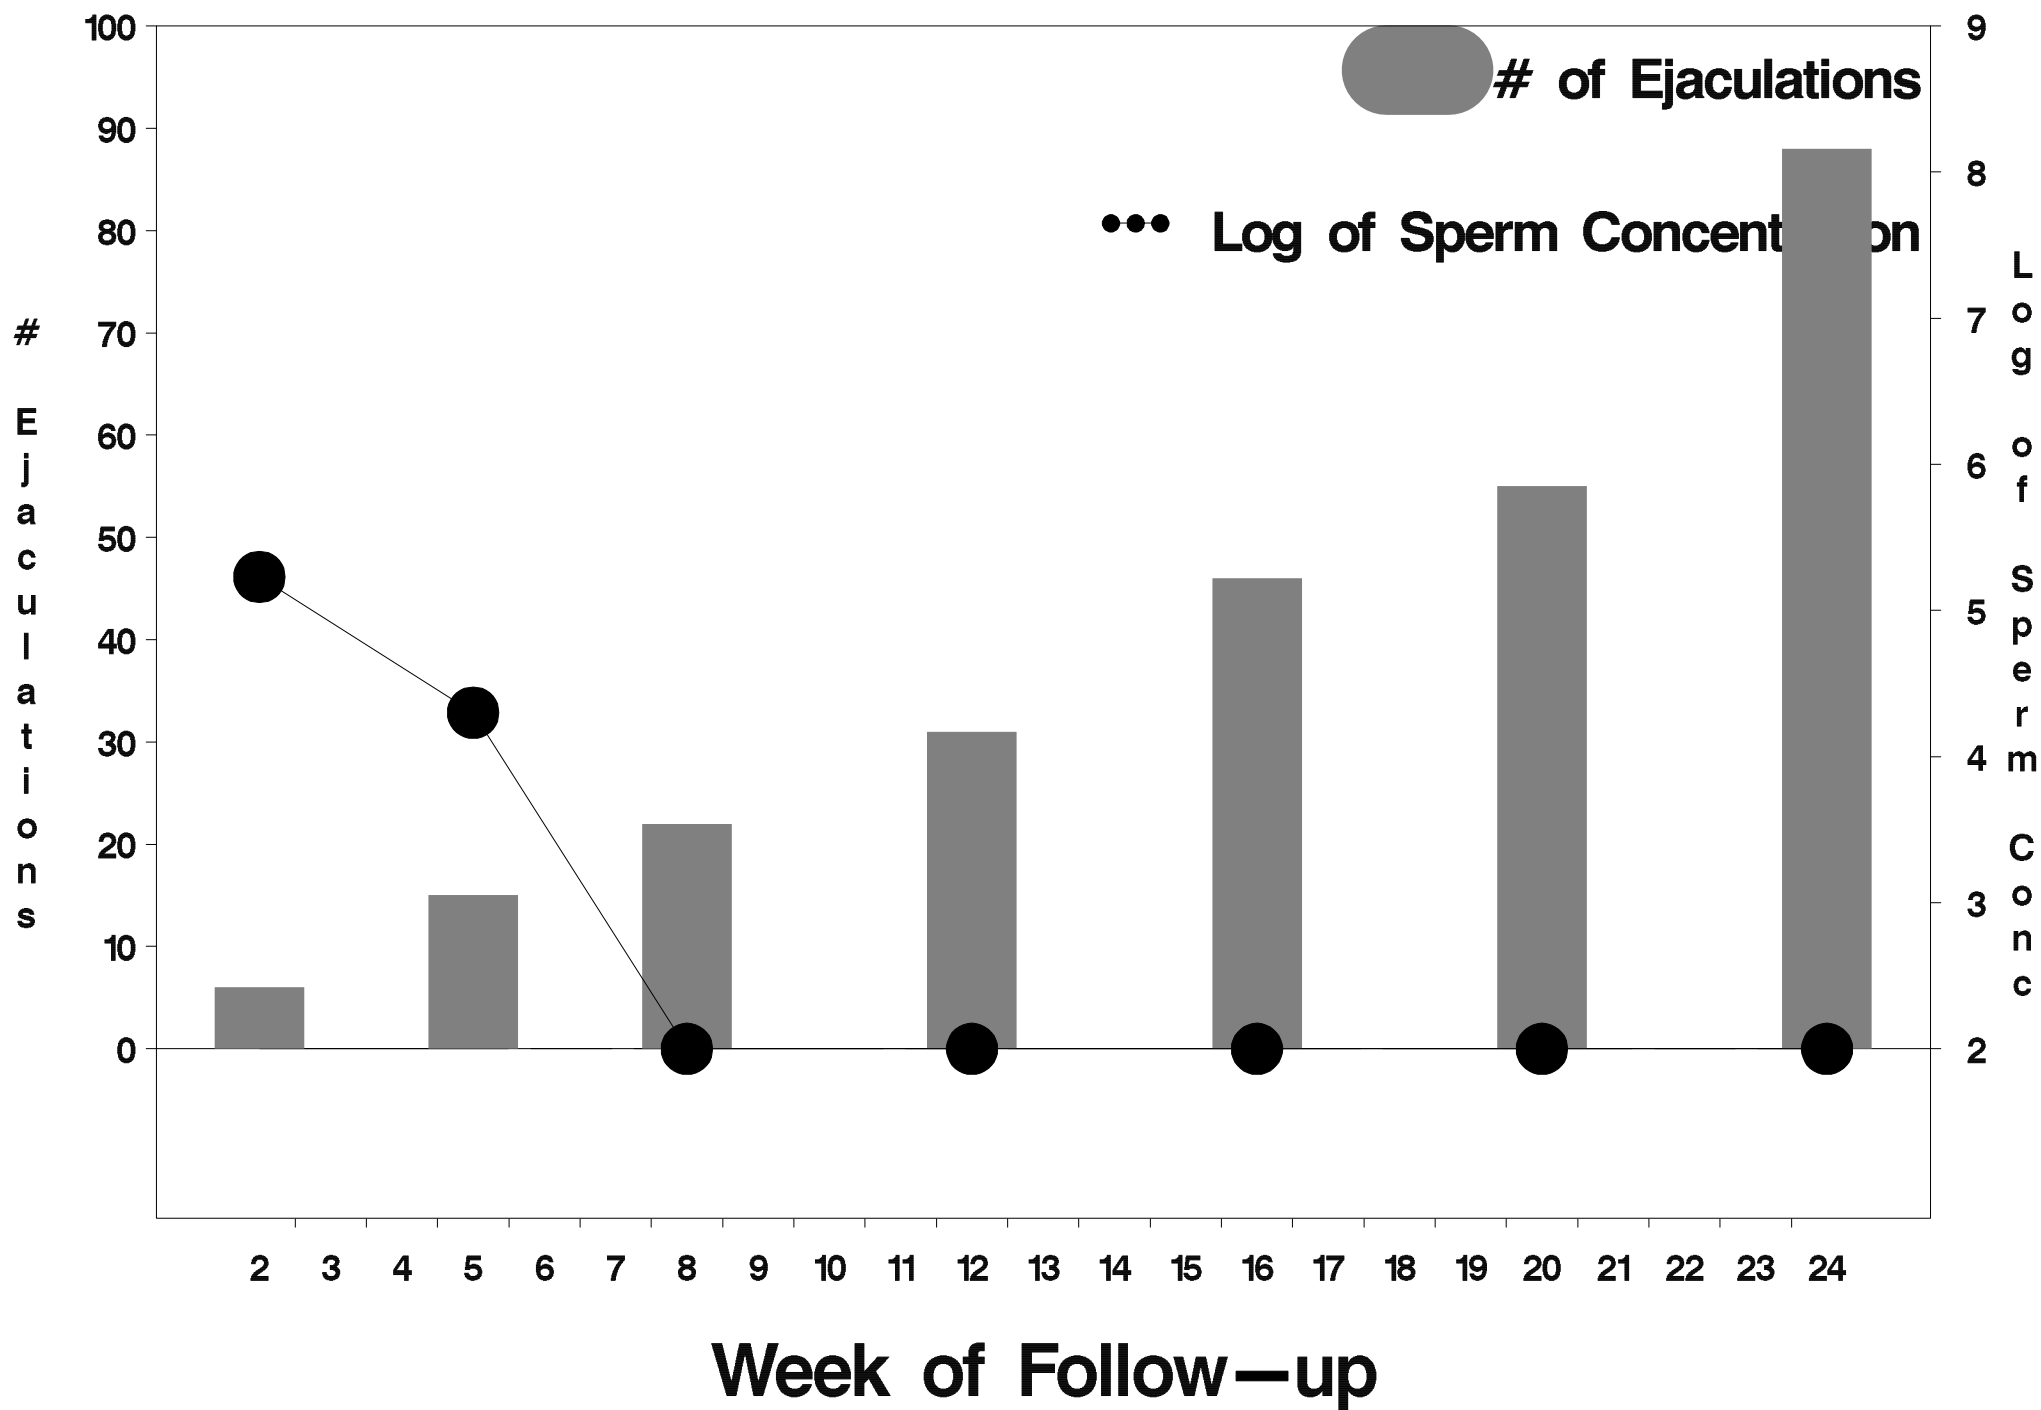



# Participant number= 181

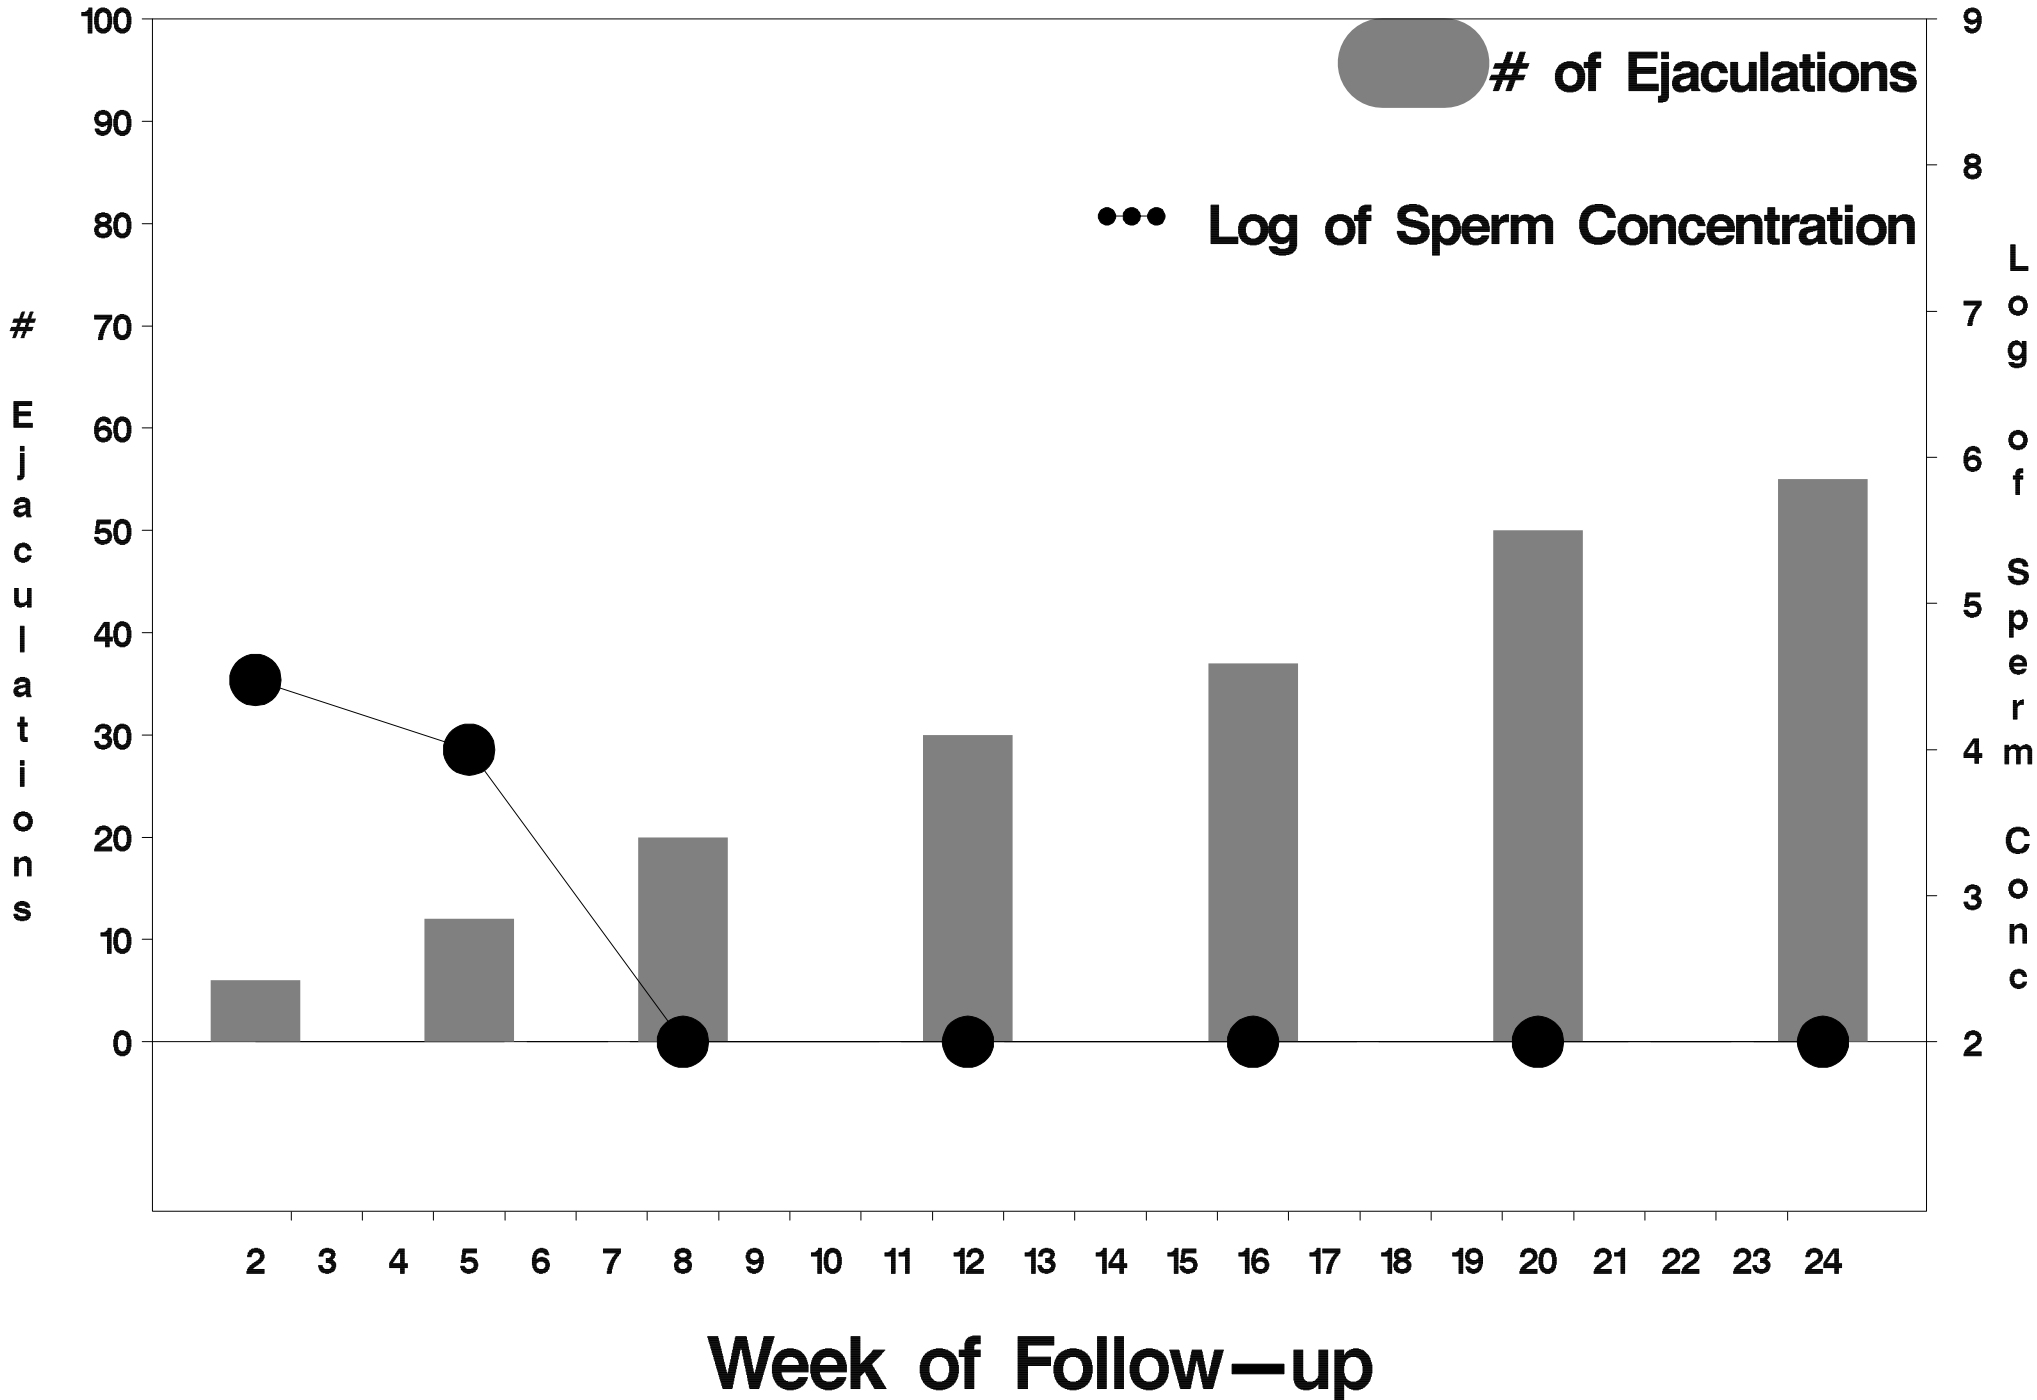

# Participant number= 182

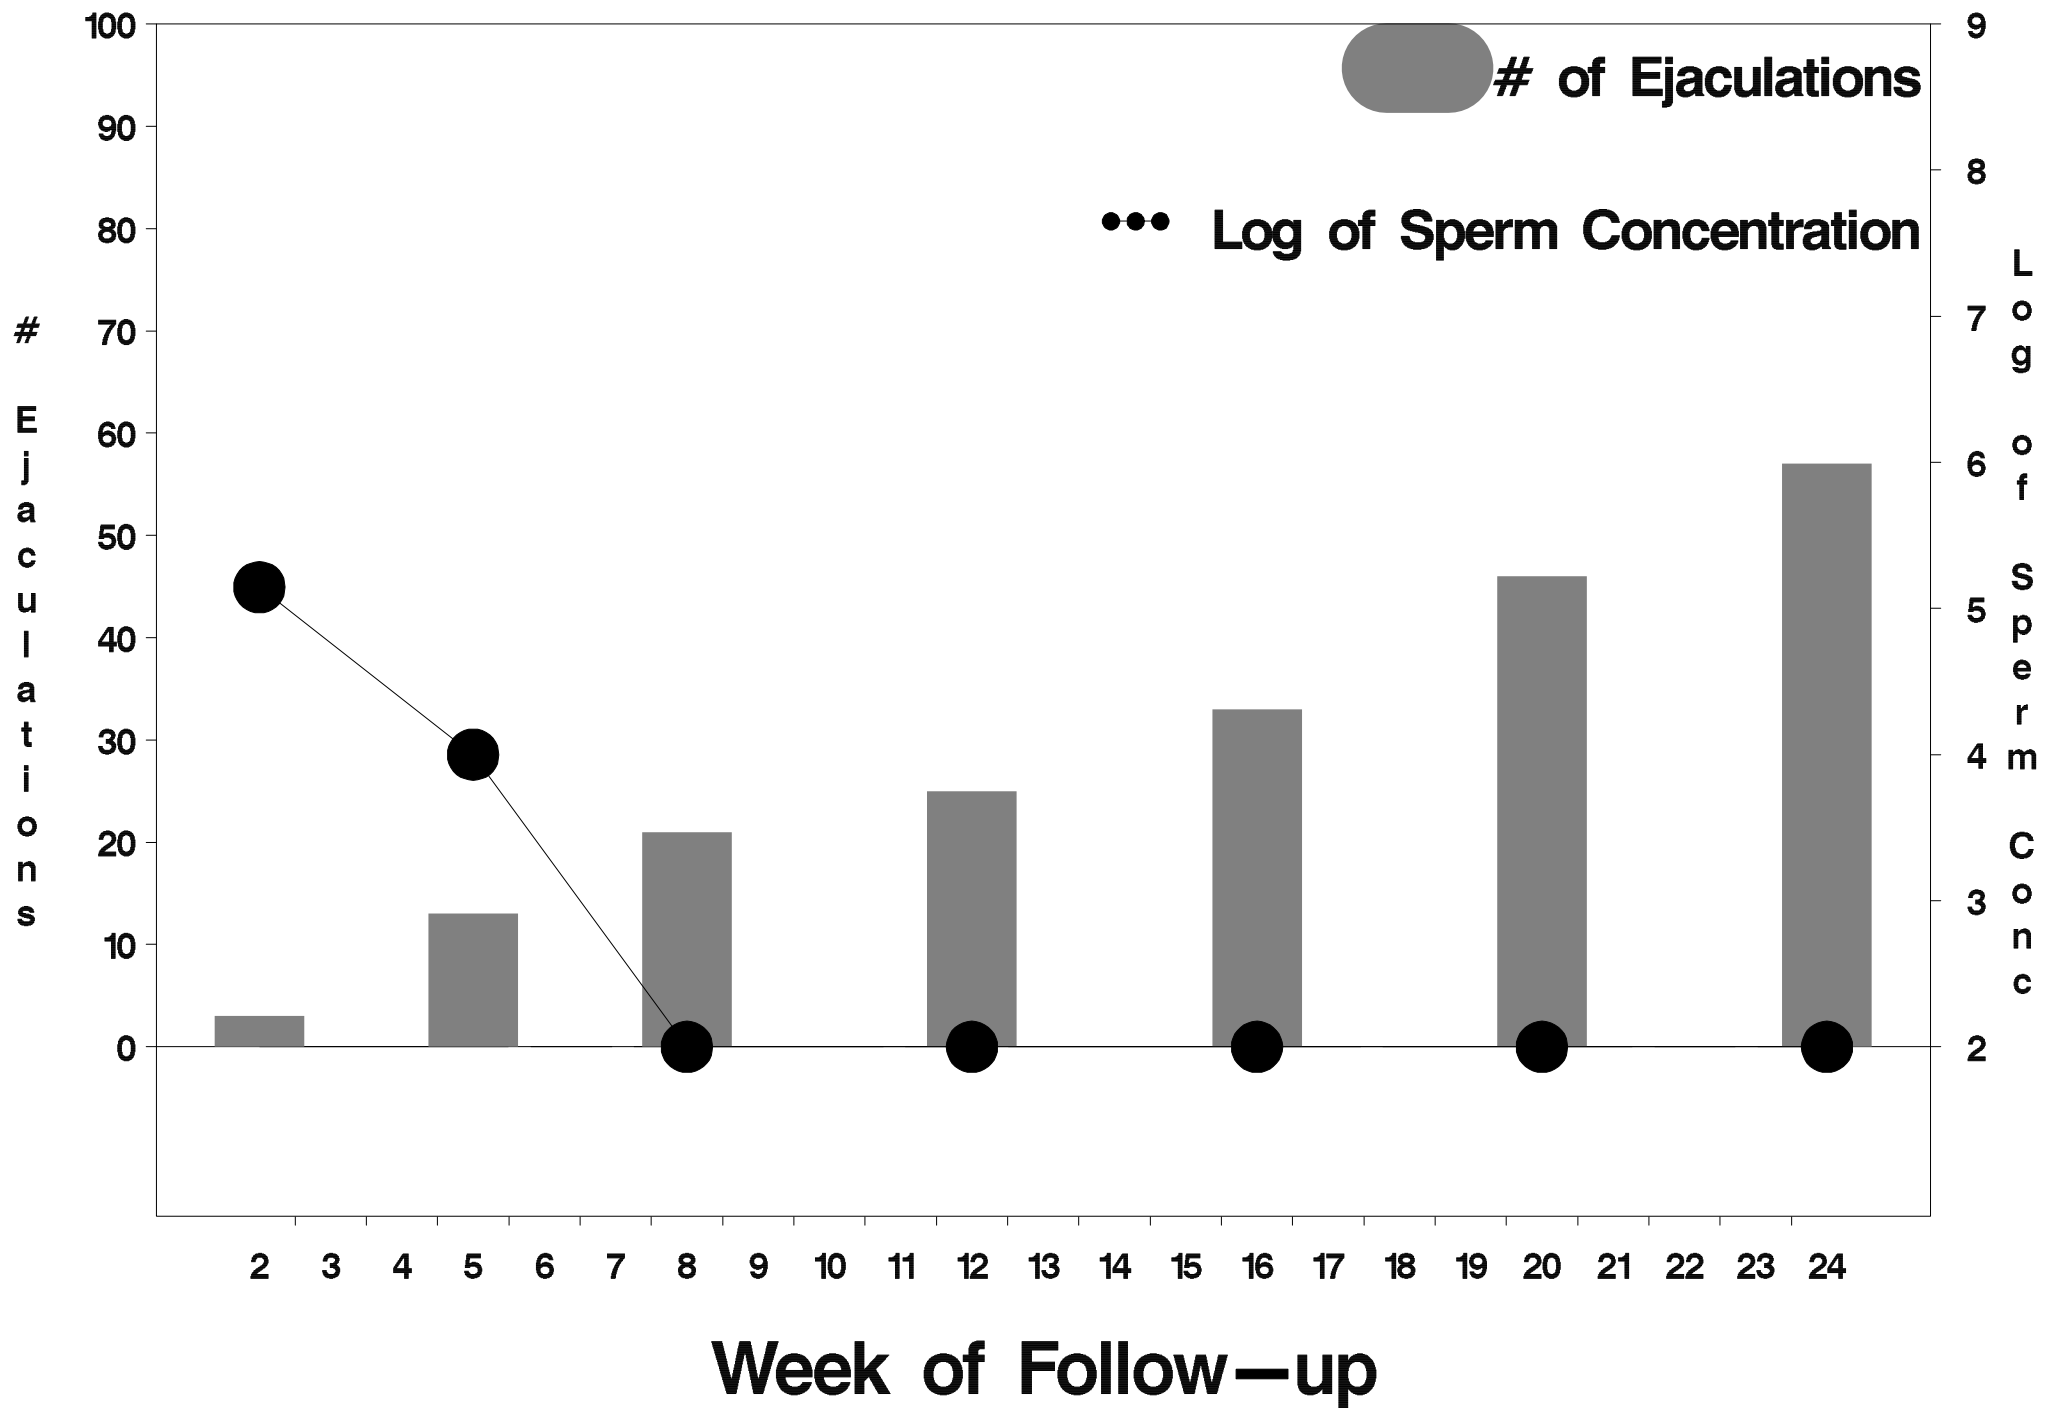

# Participant number= 183

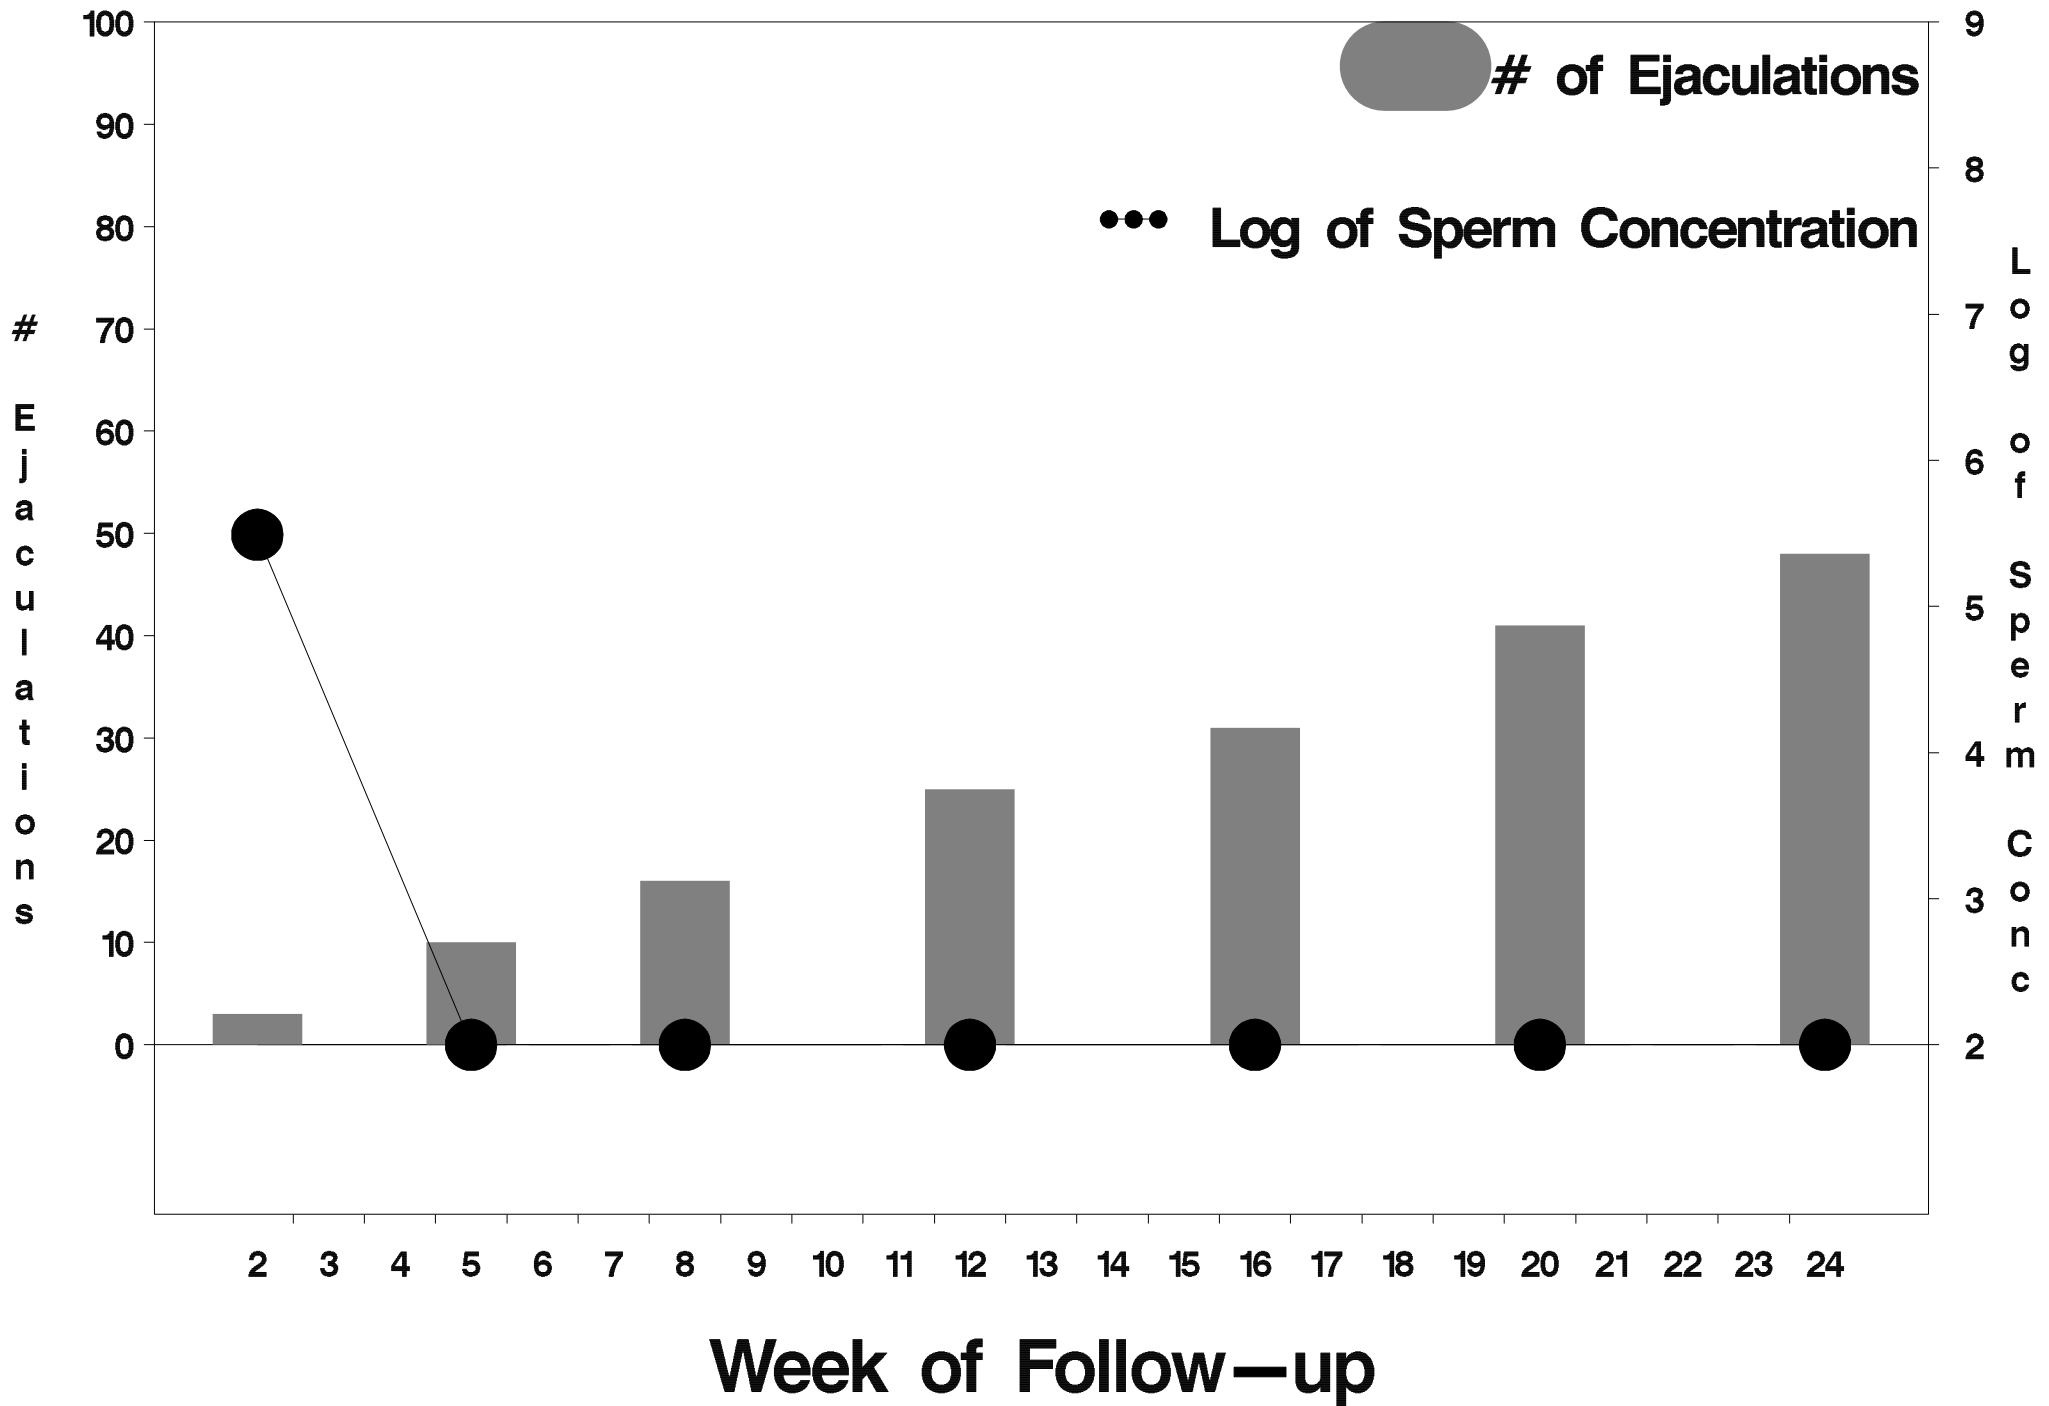

# Participant number= 184

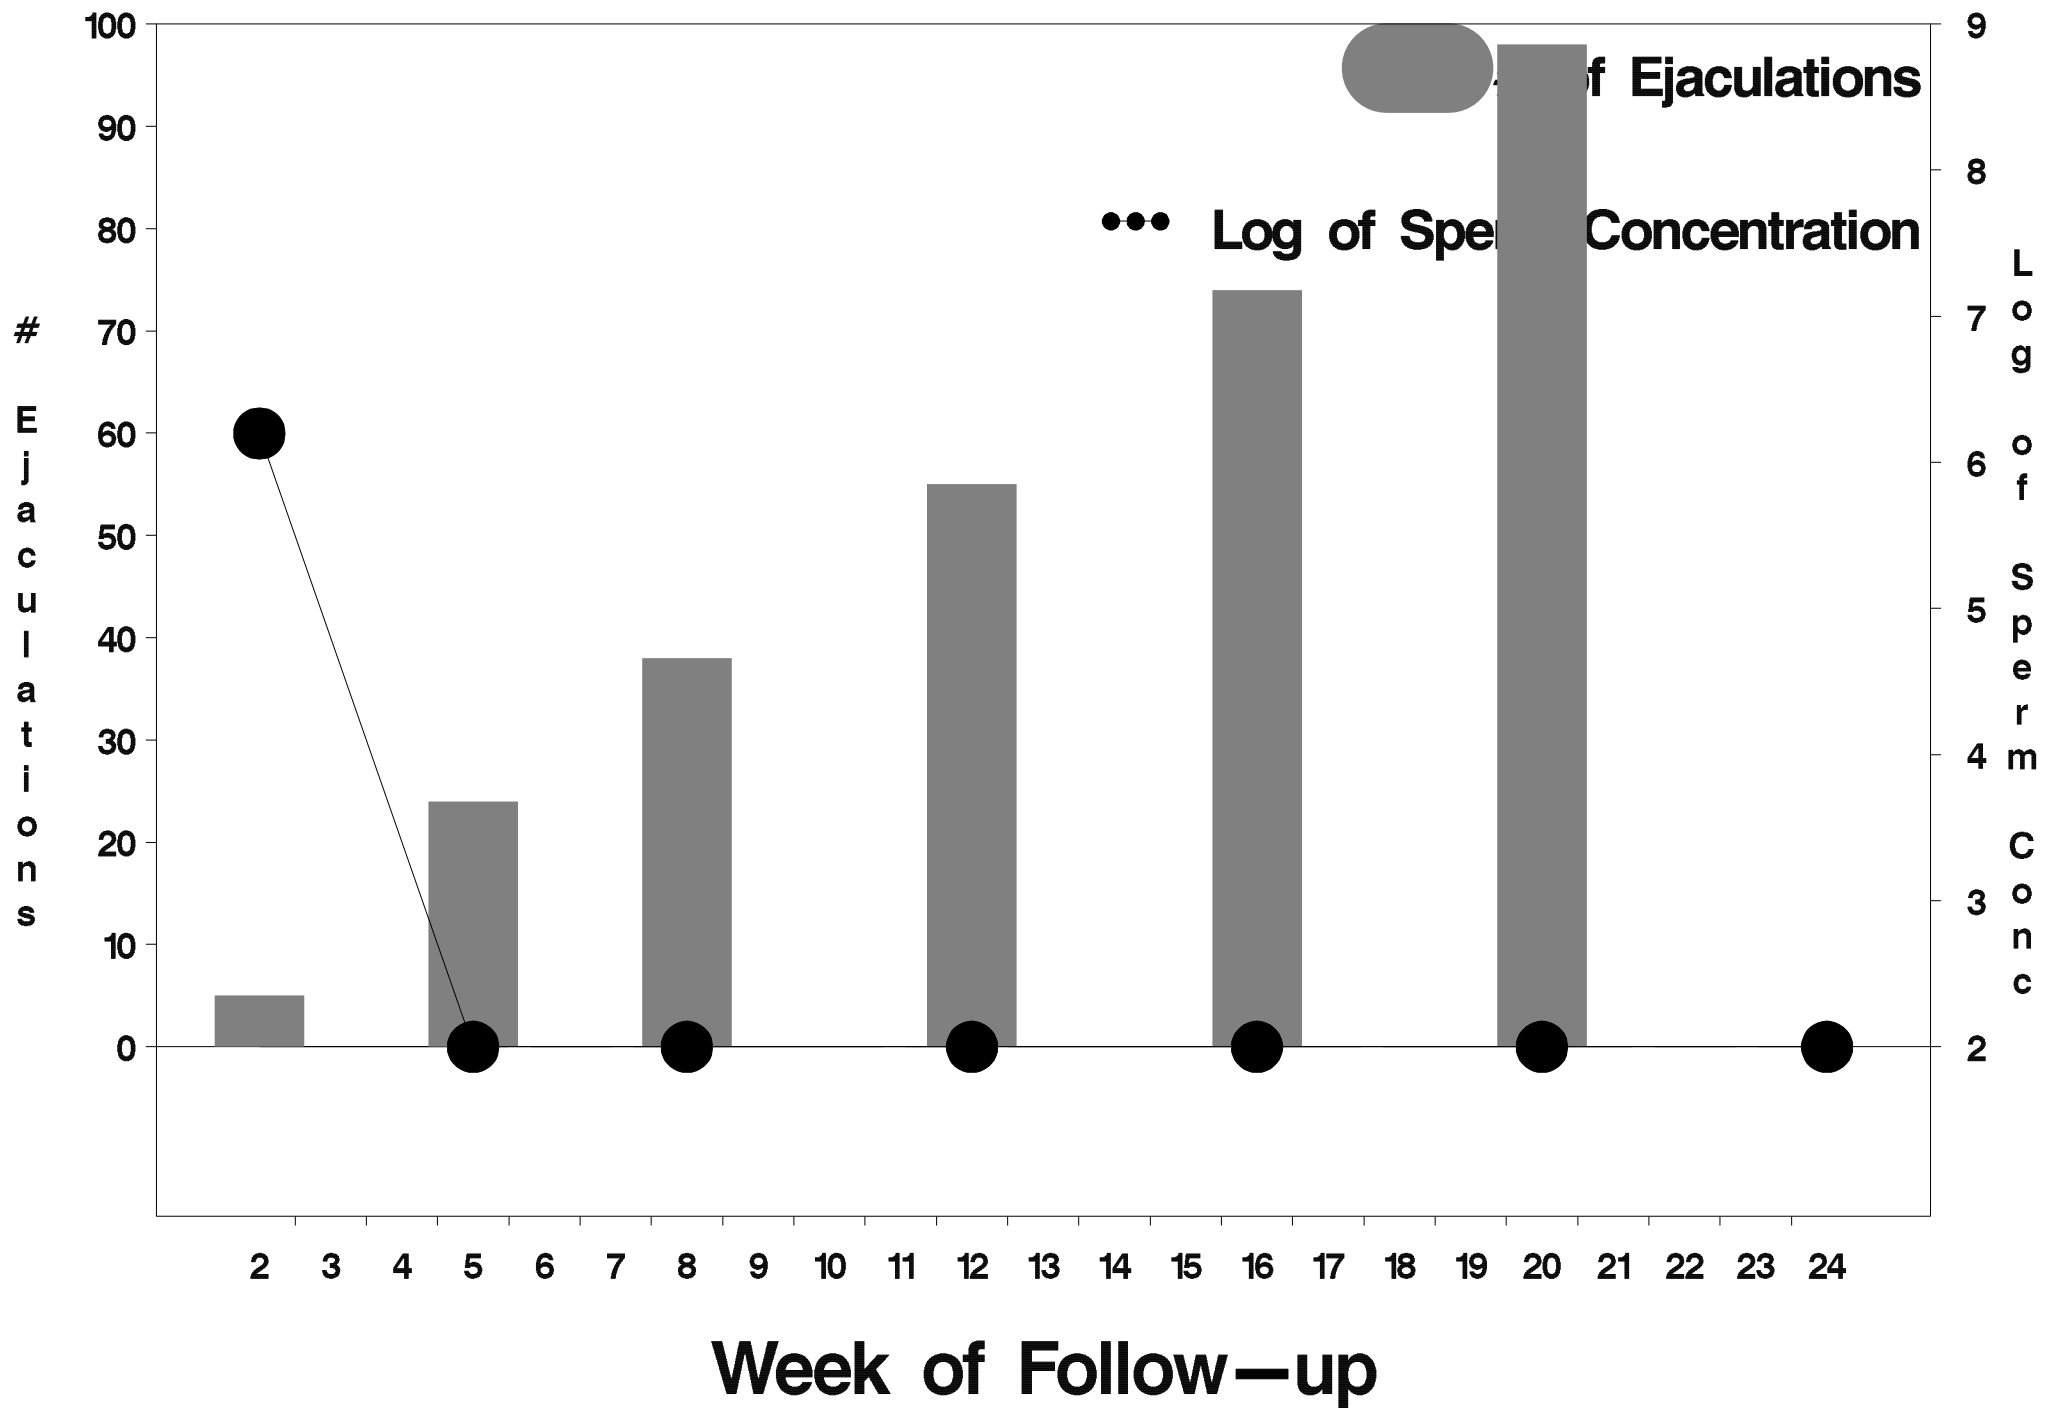

# Participant number= 185

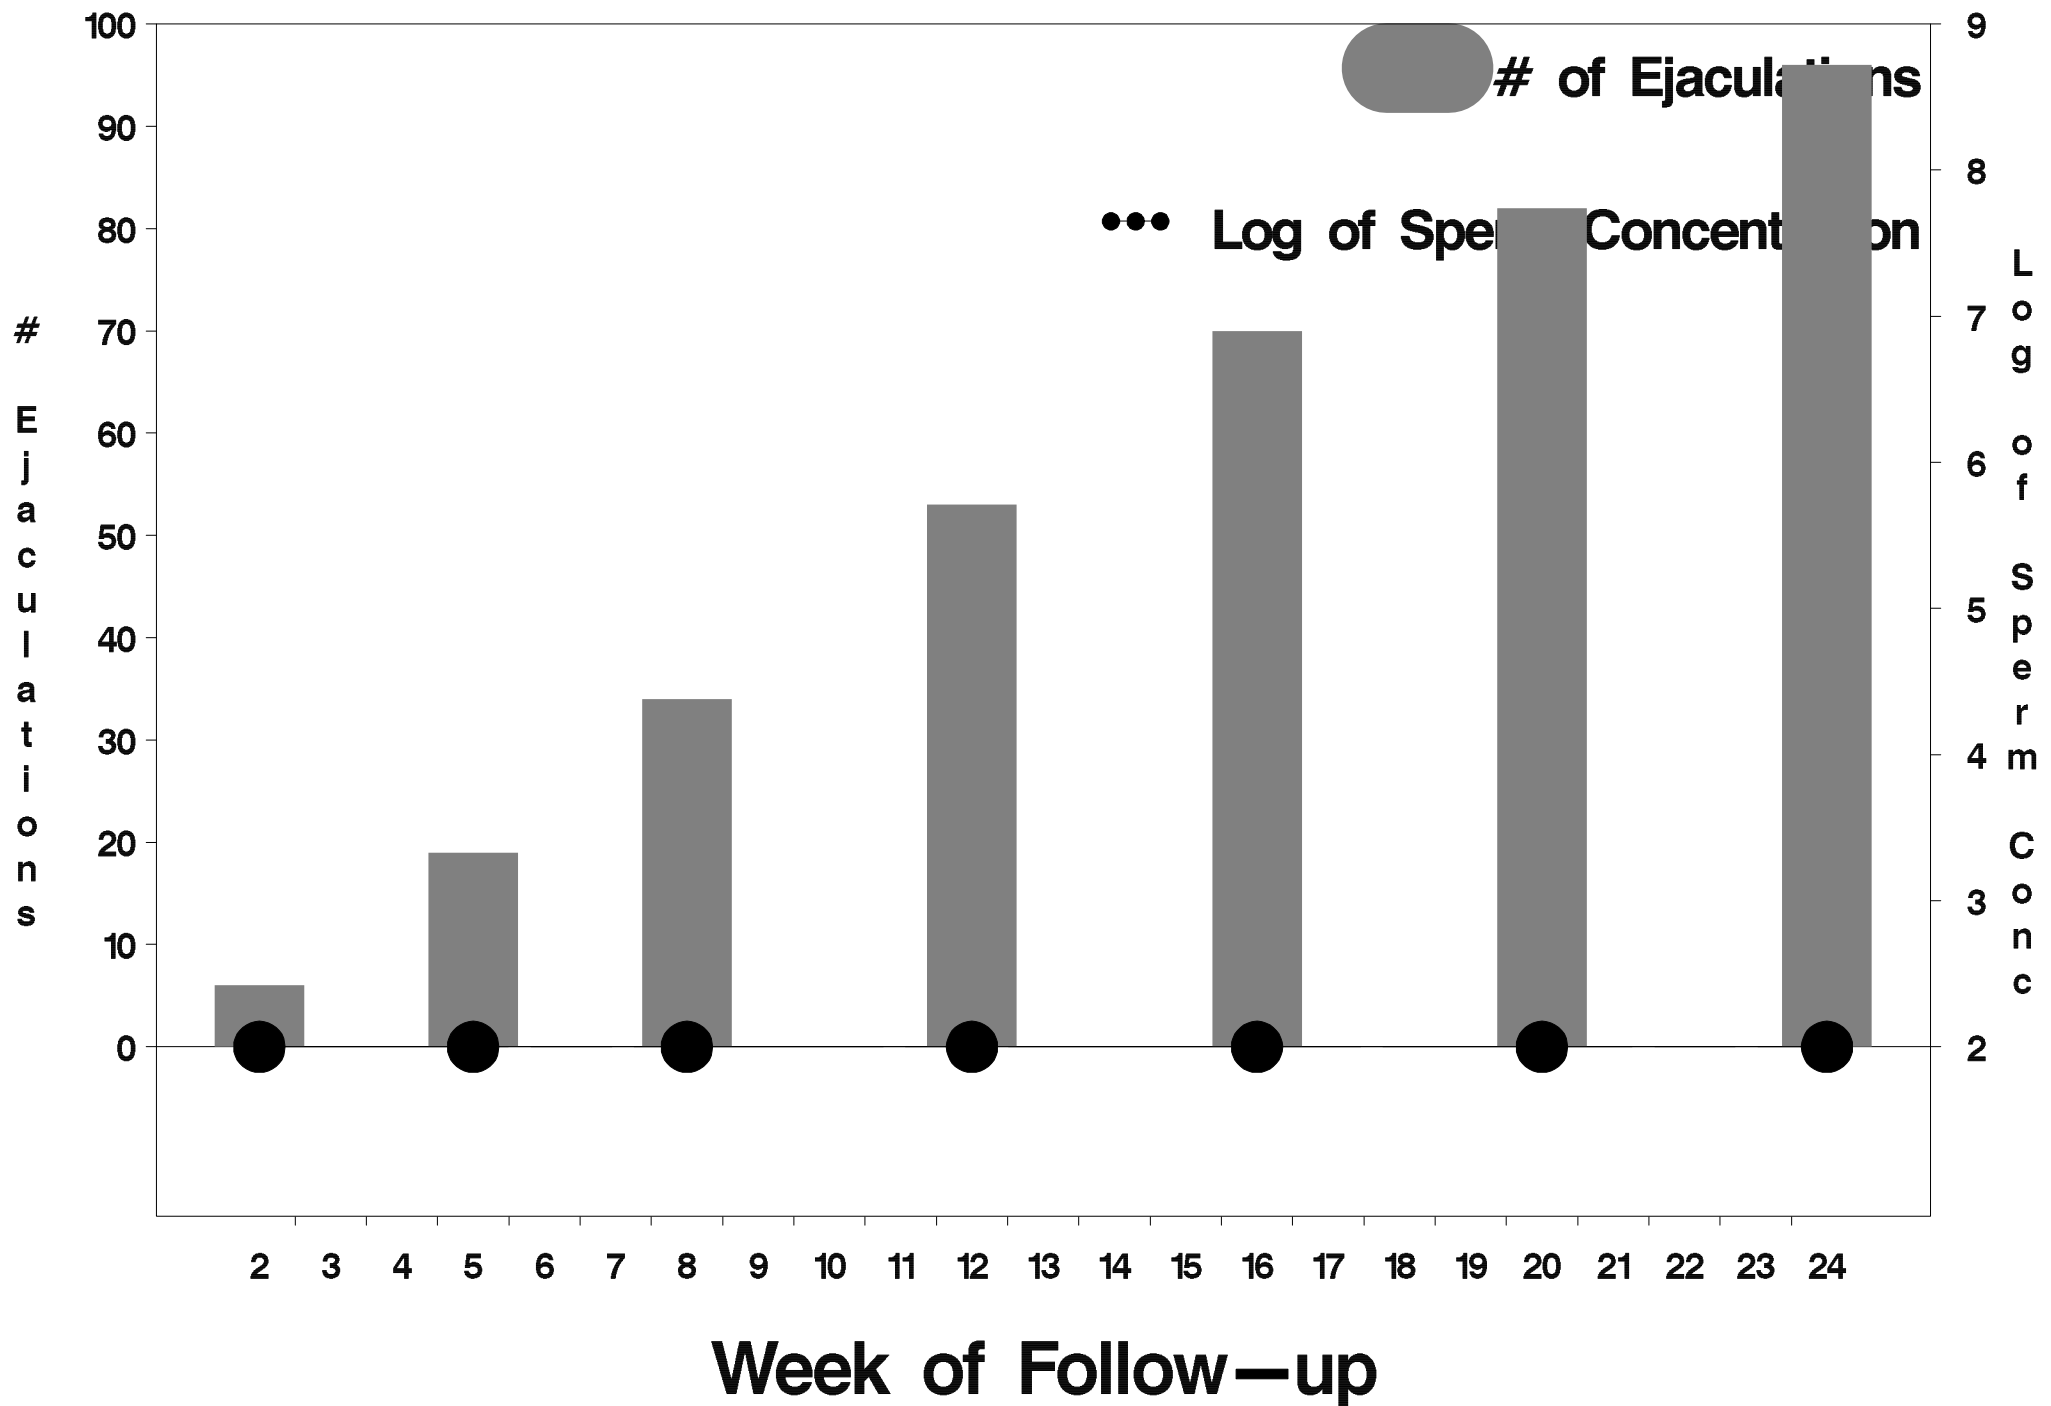

# Participant number= 186

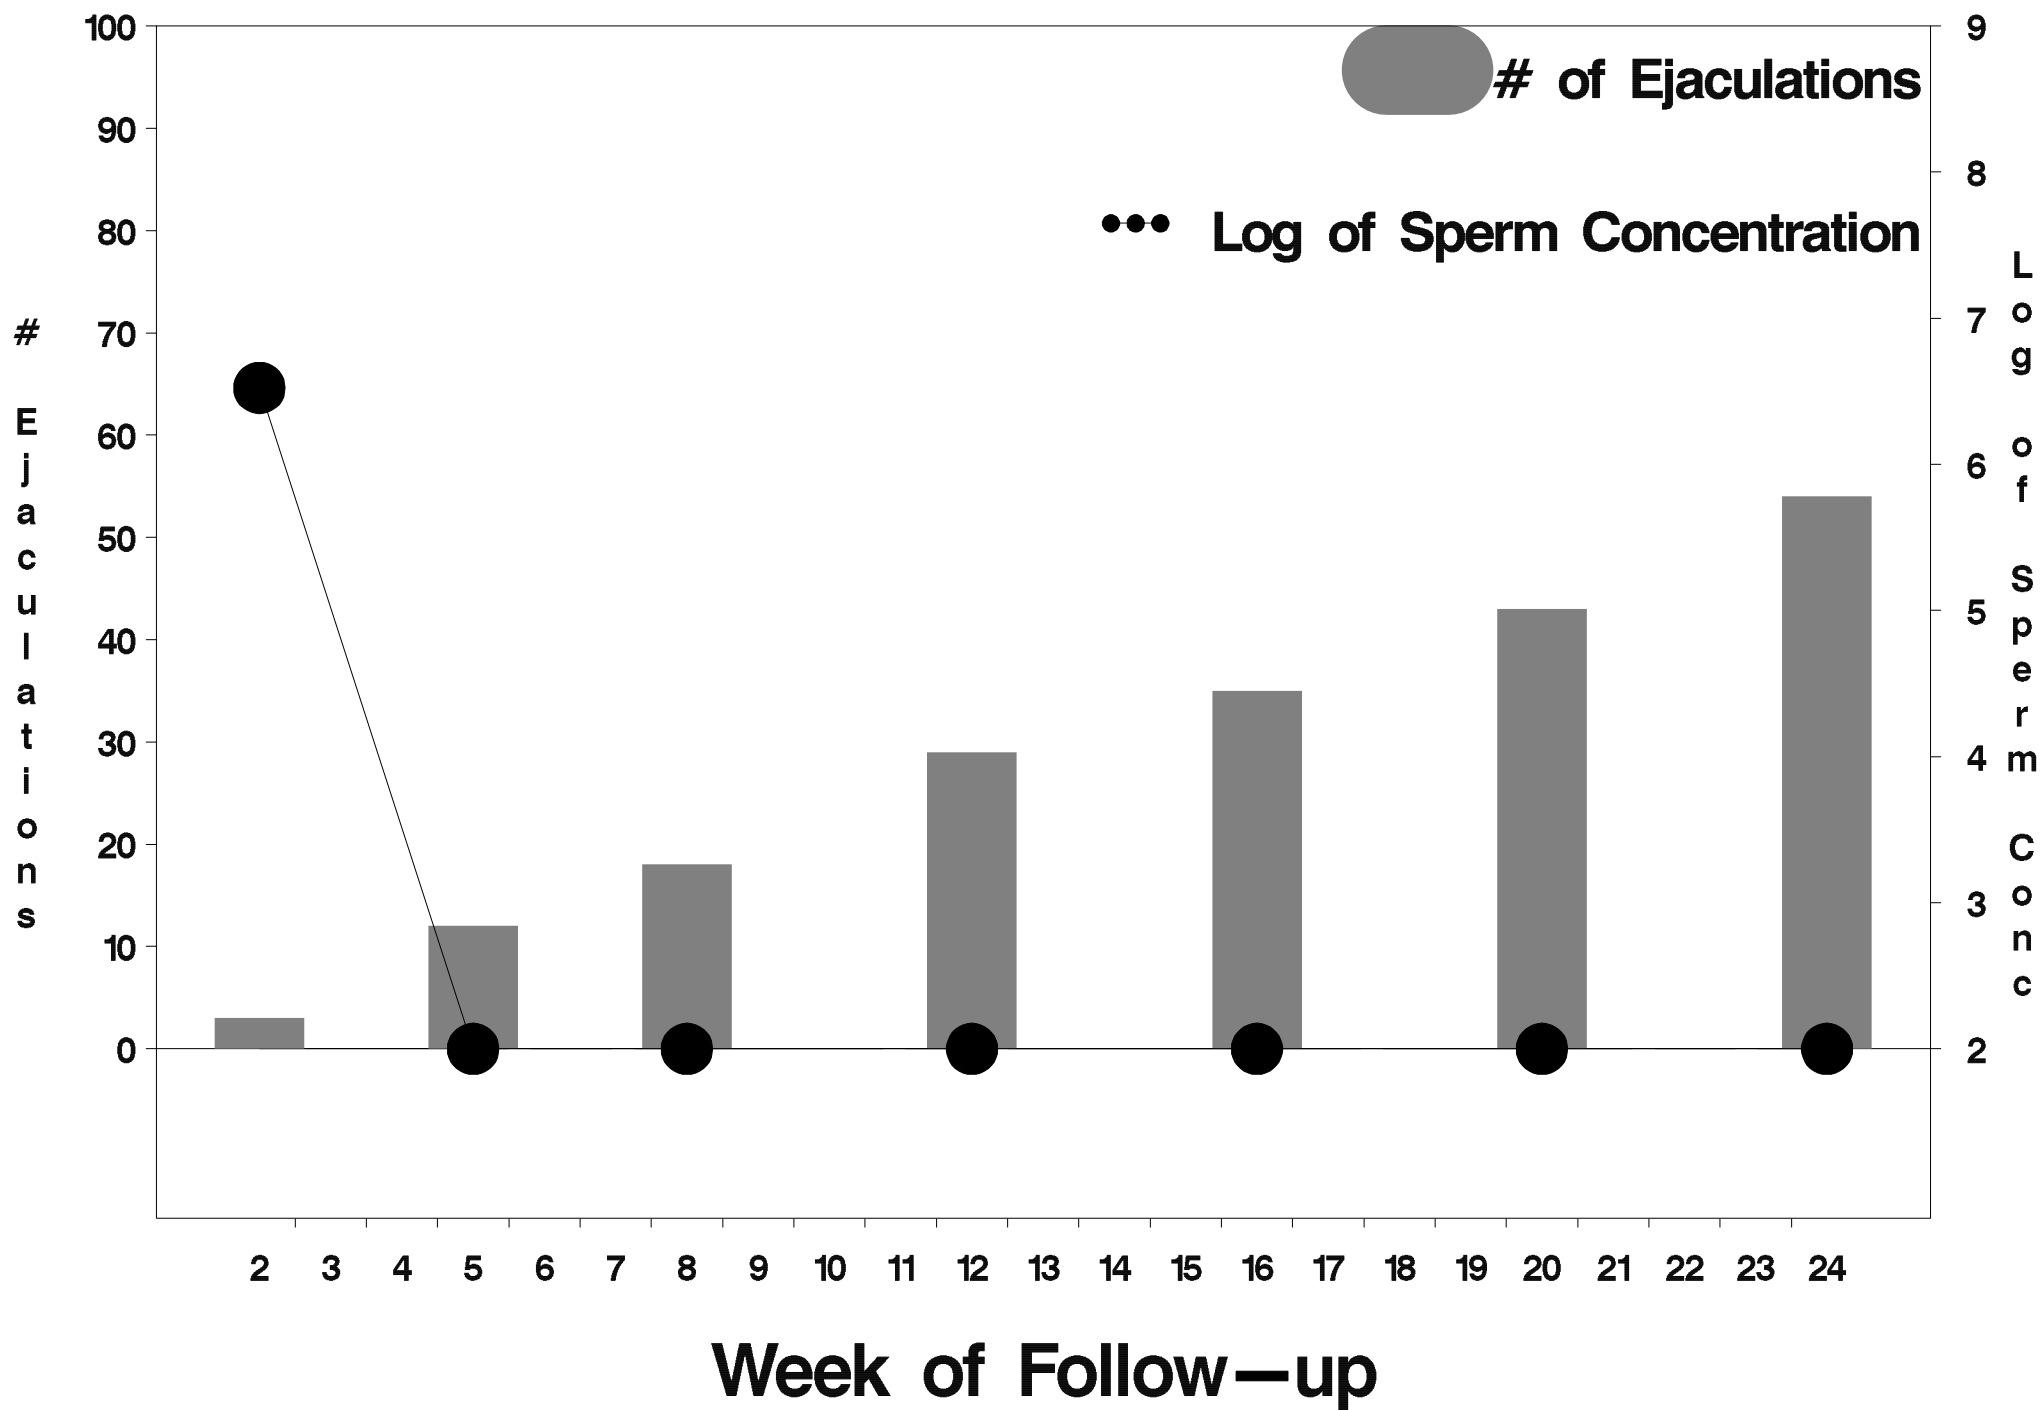

# Participant number= 187

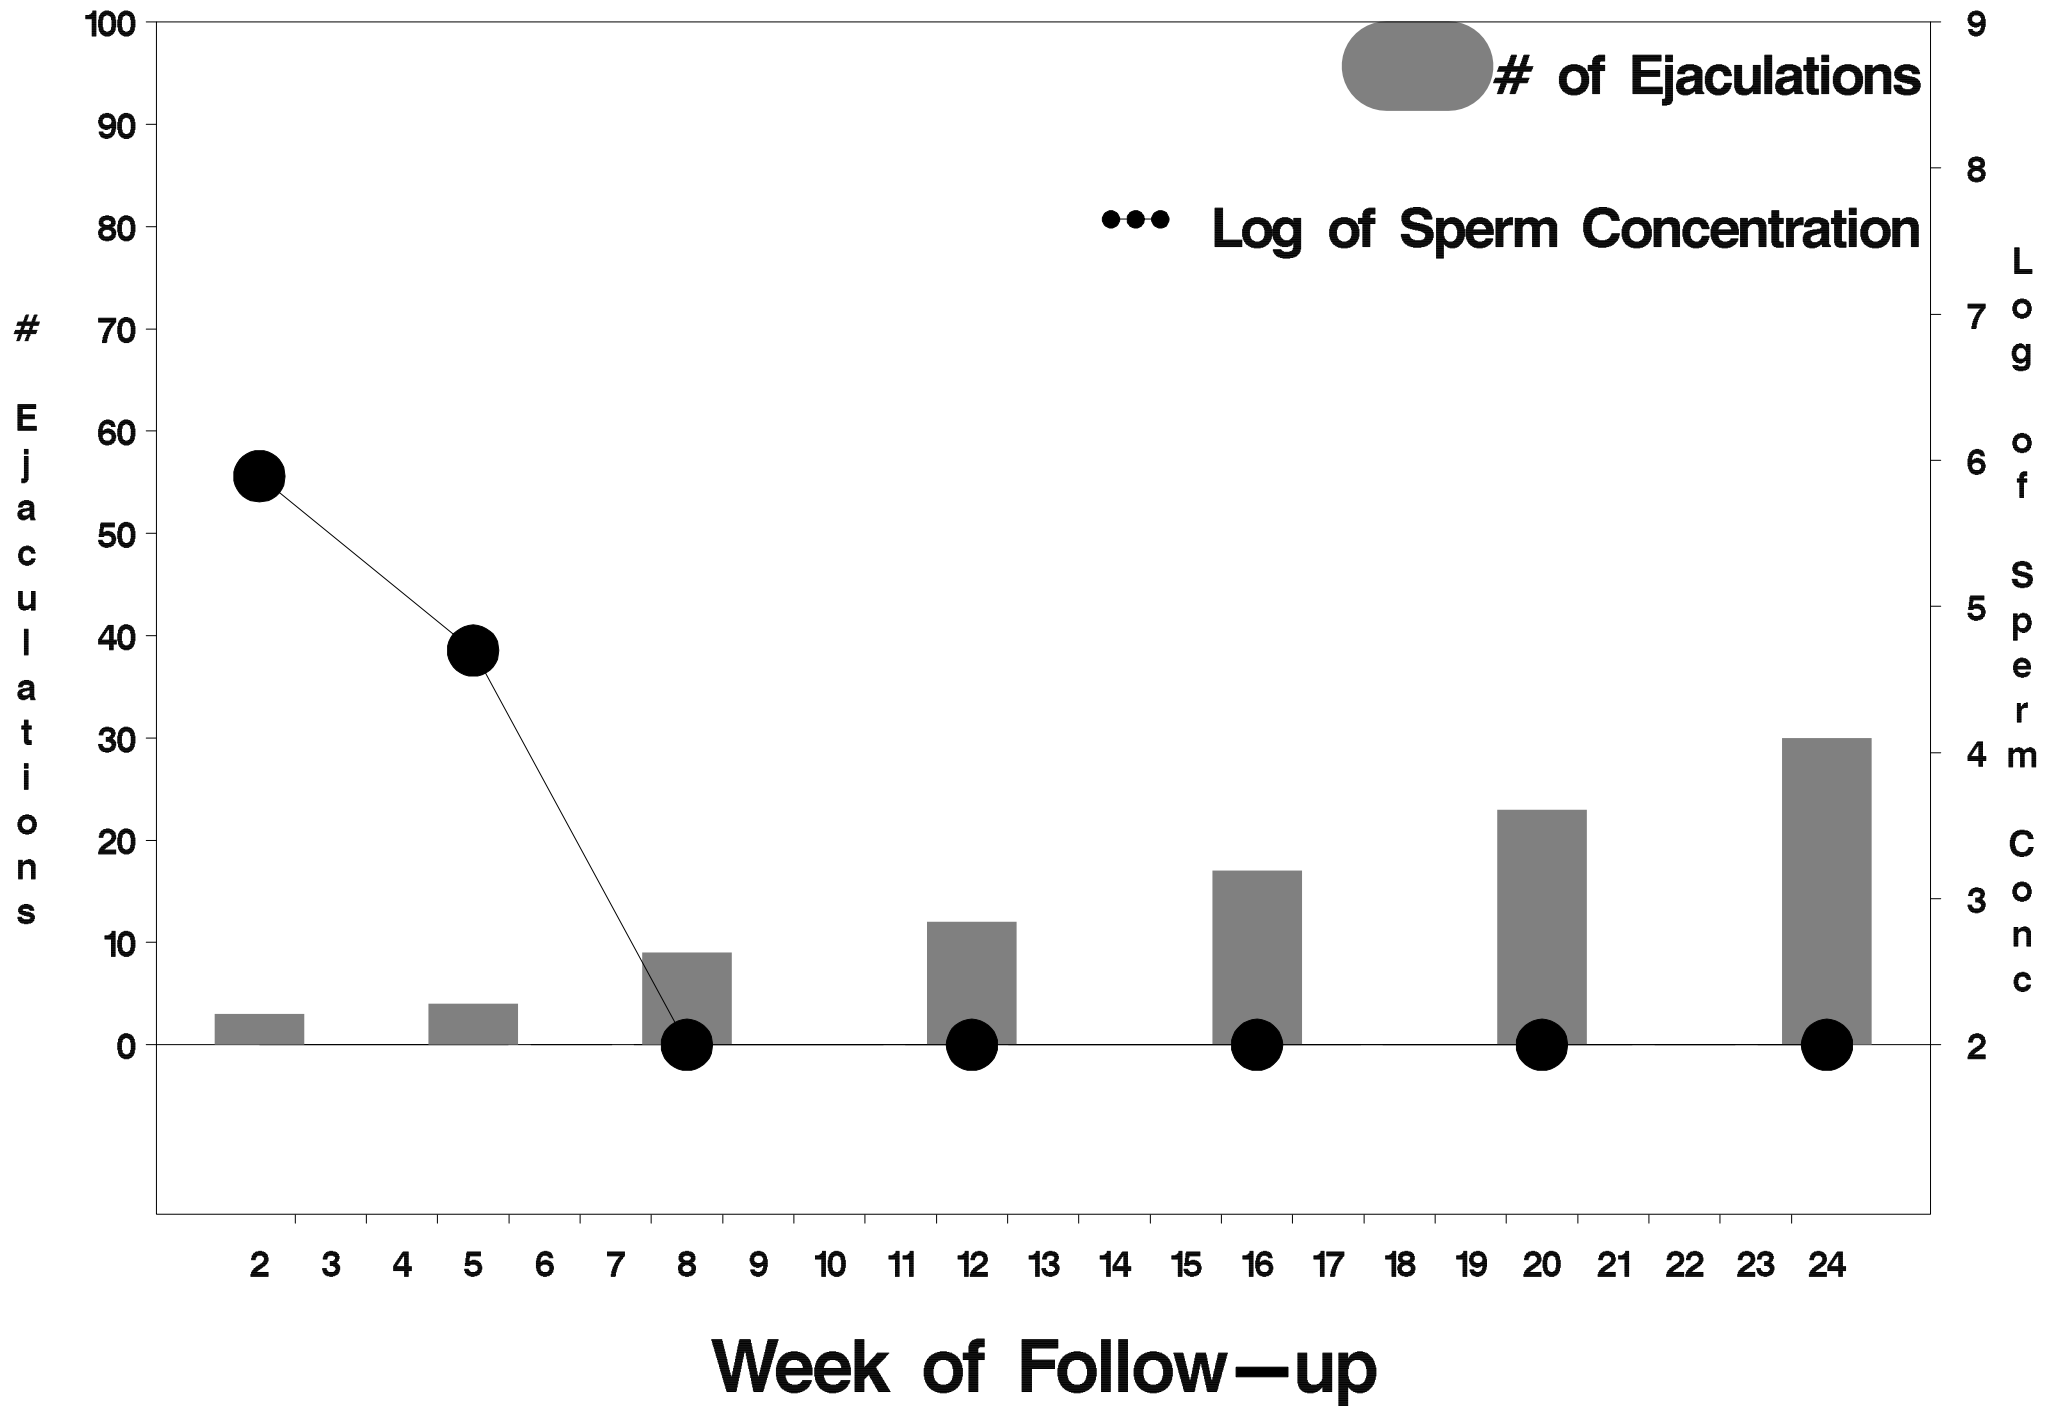

# Participant number= 188

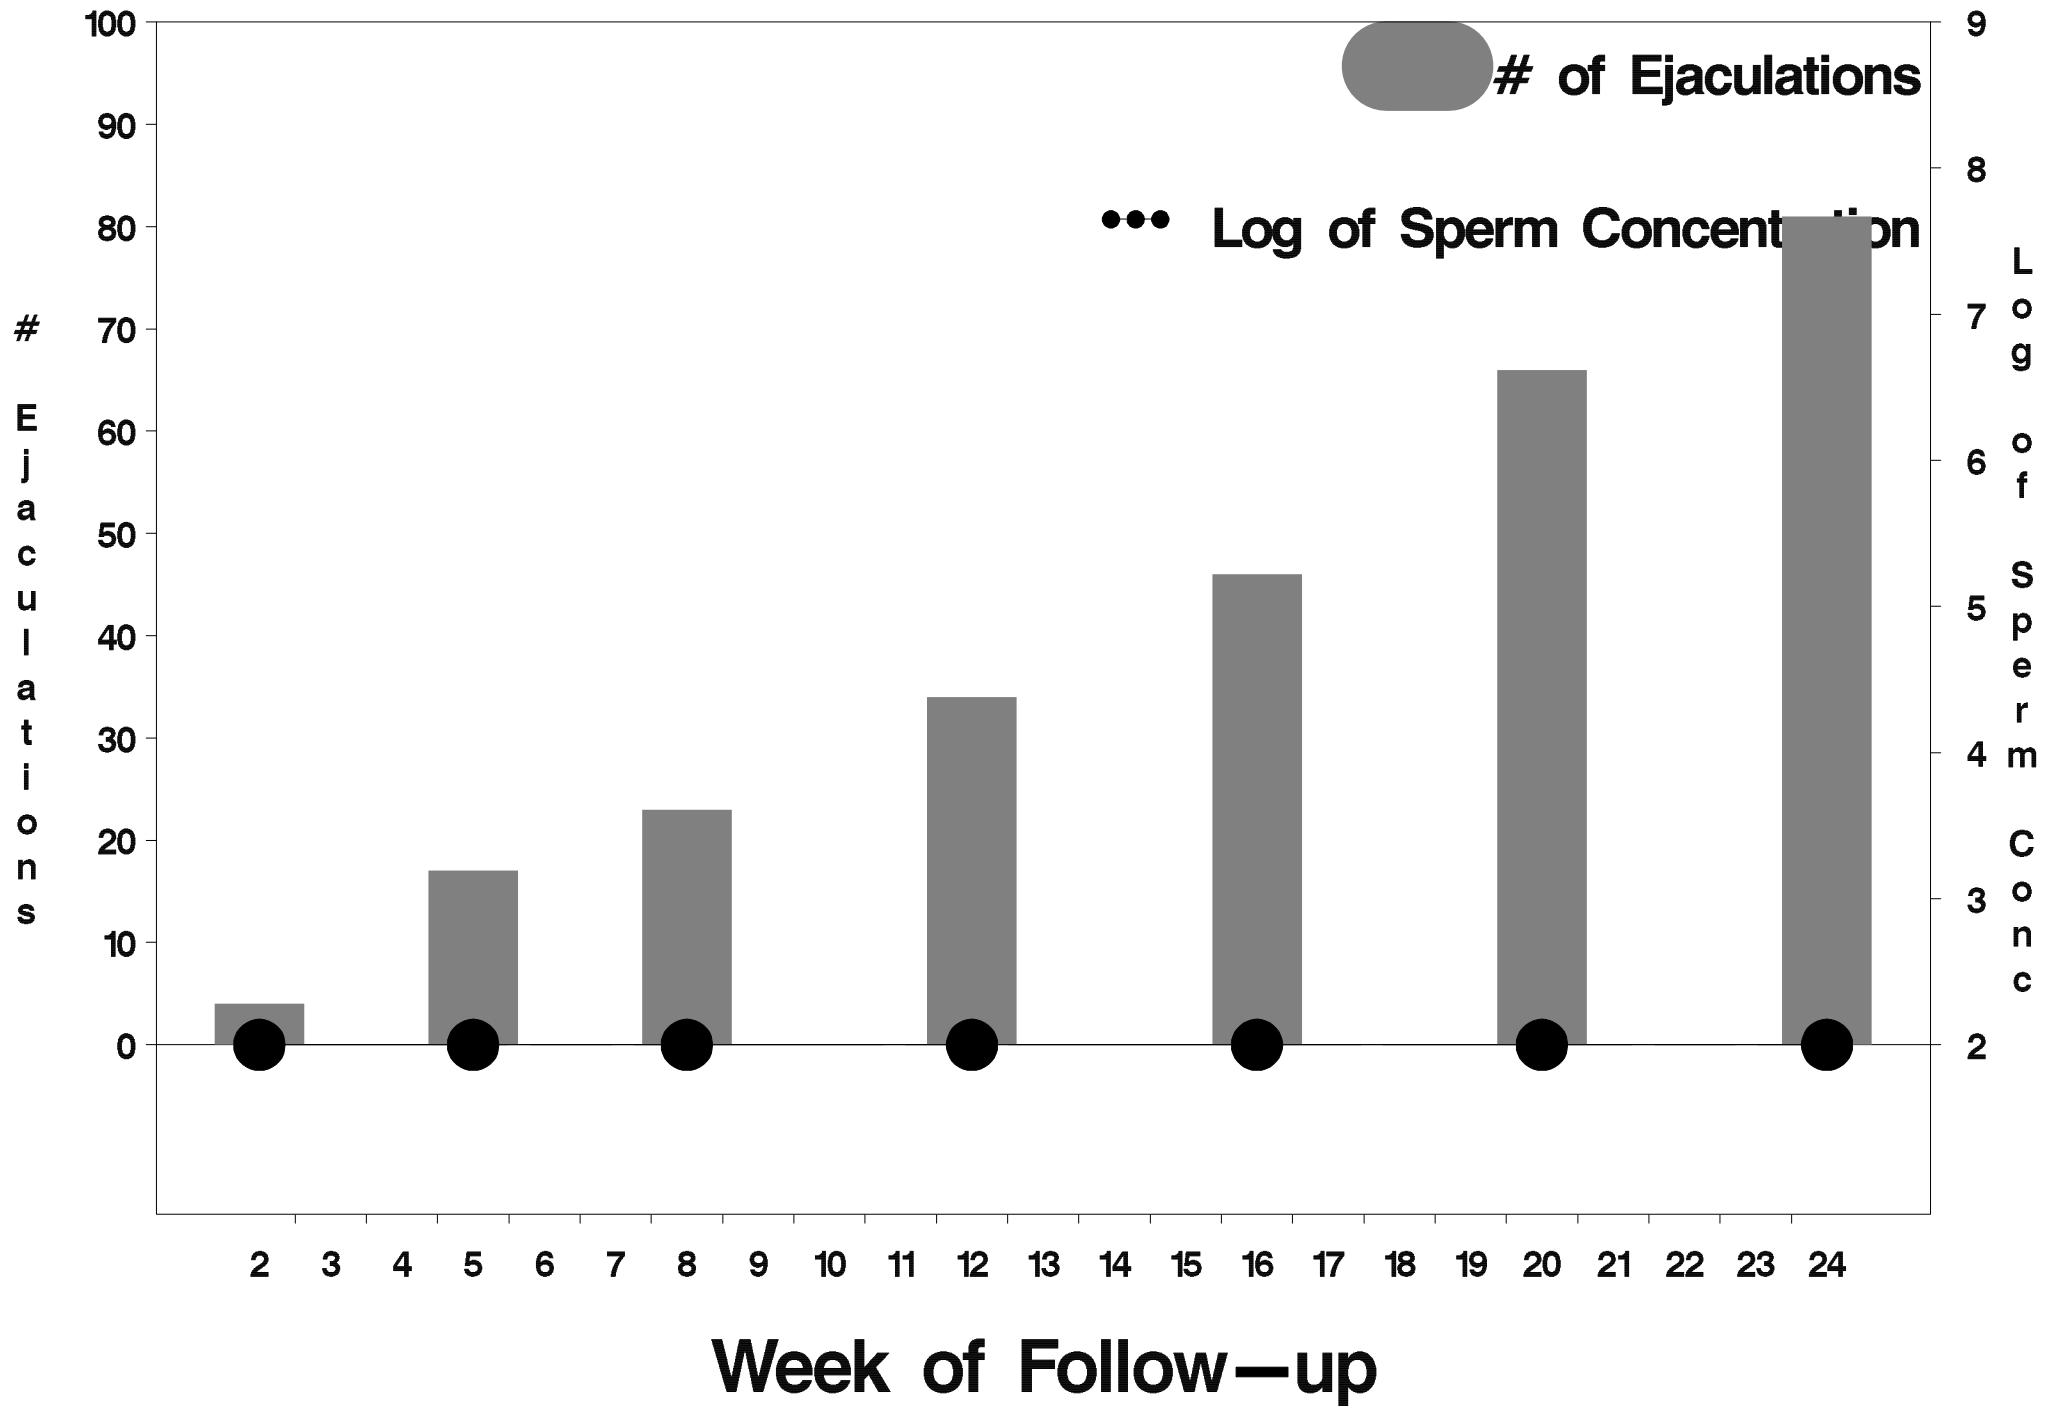



# Participant number= 189

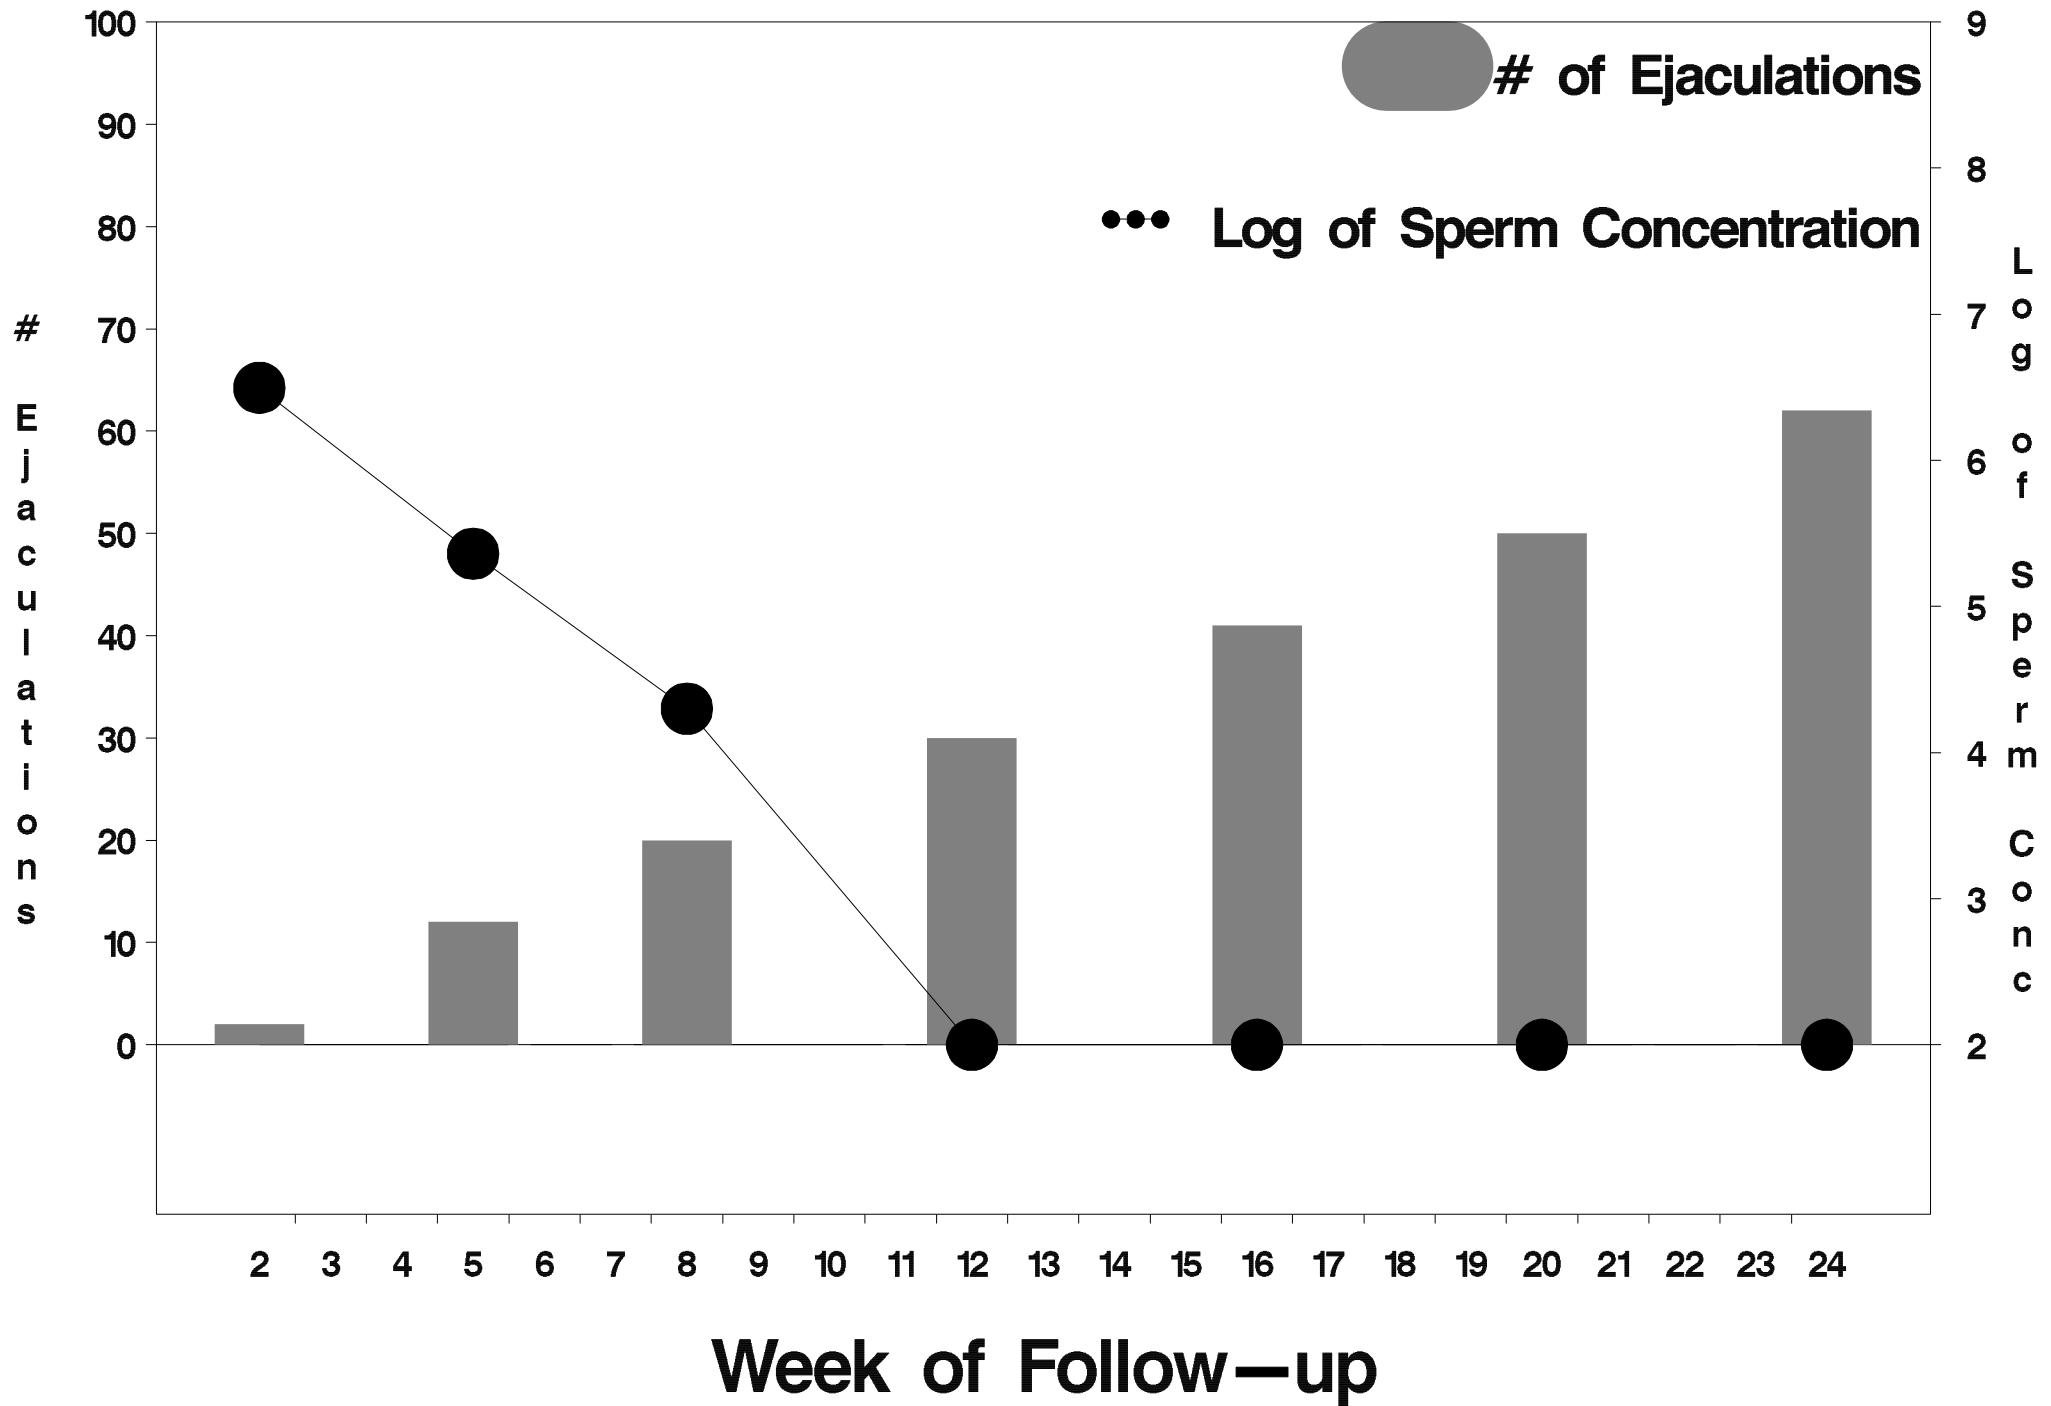

# Participant number= 190

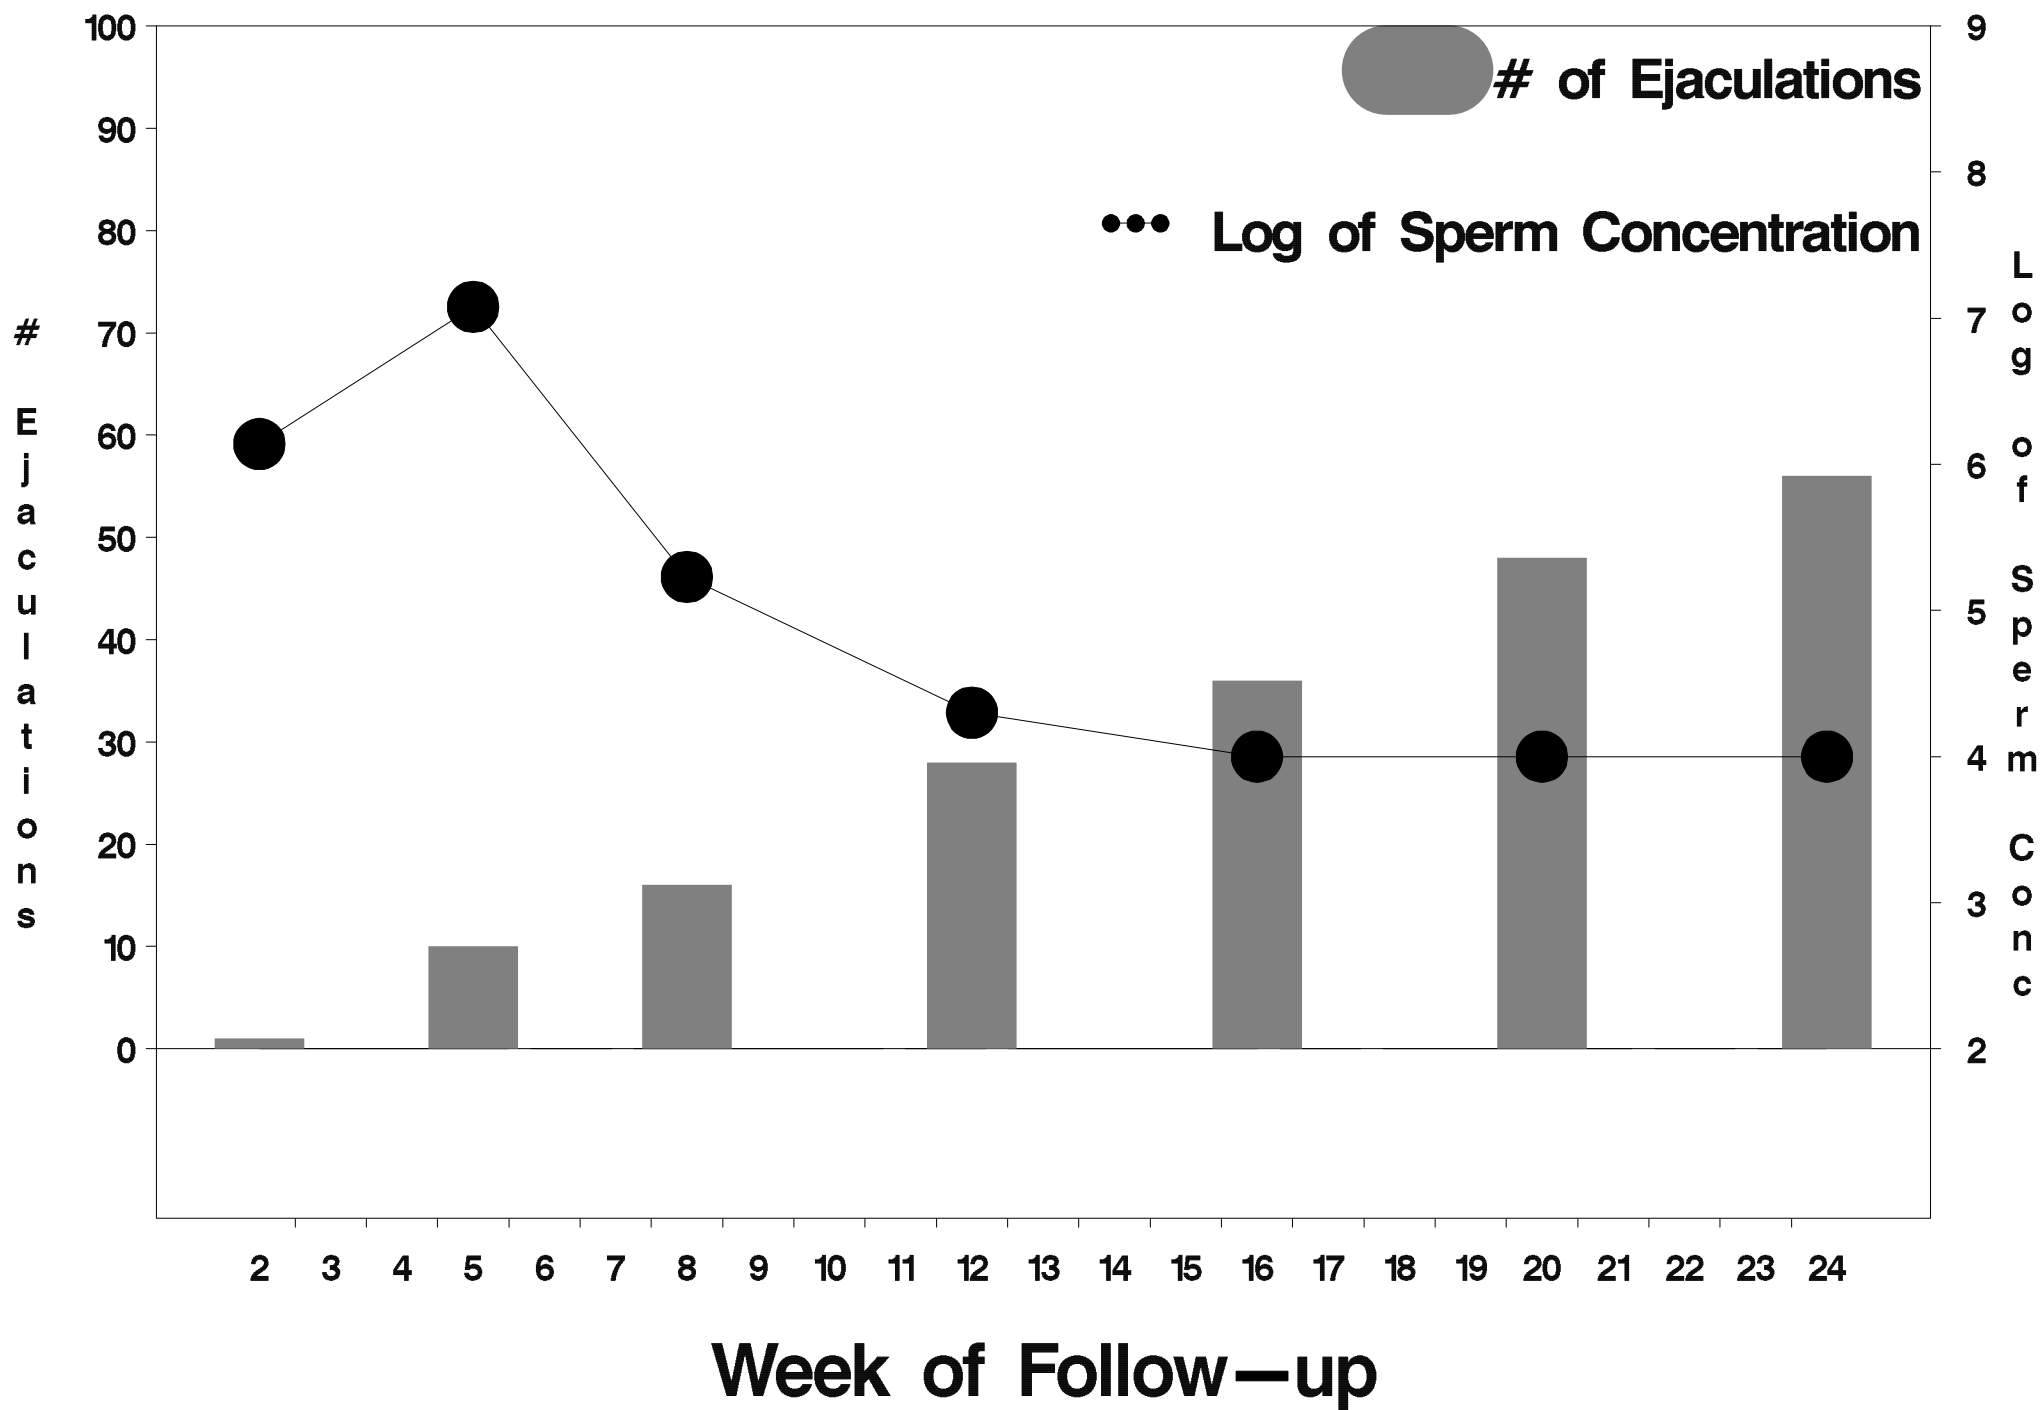

# Participant number= 191

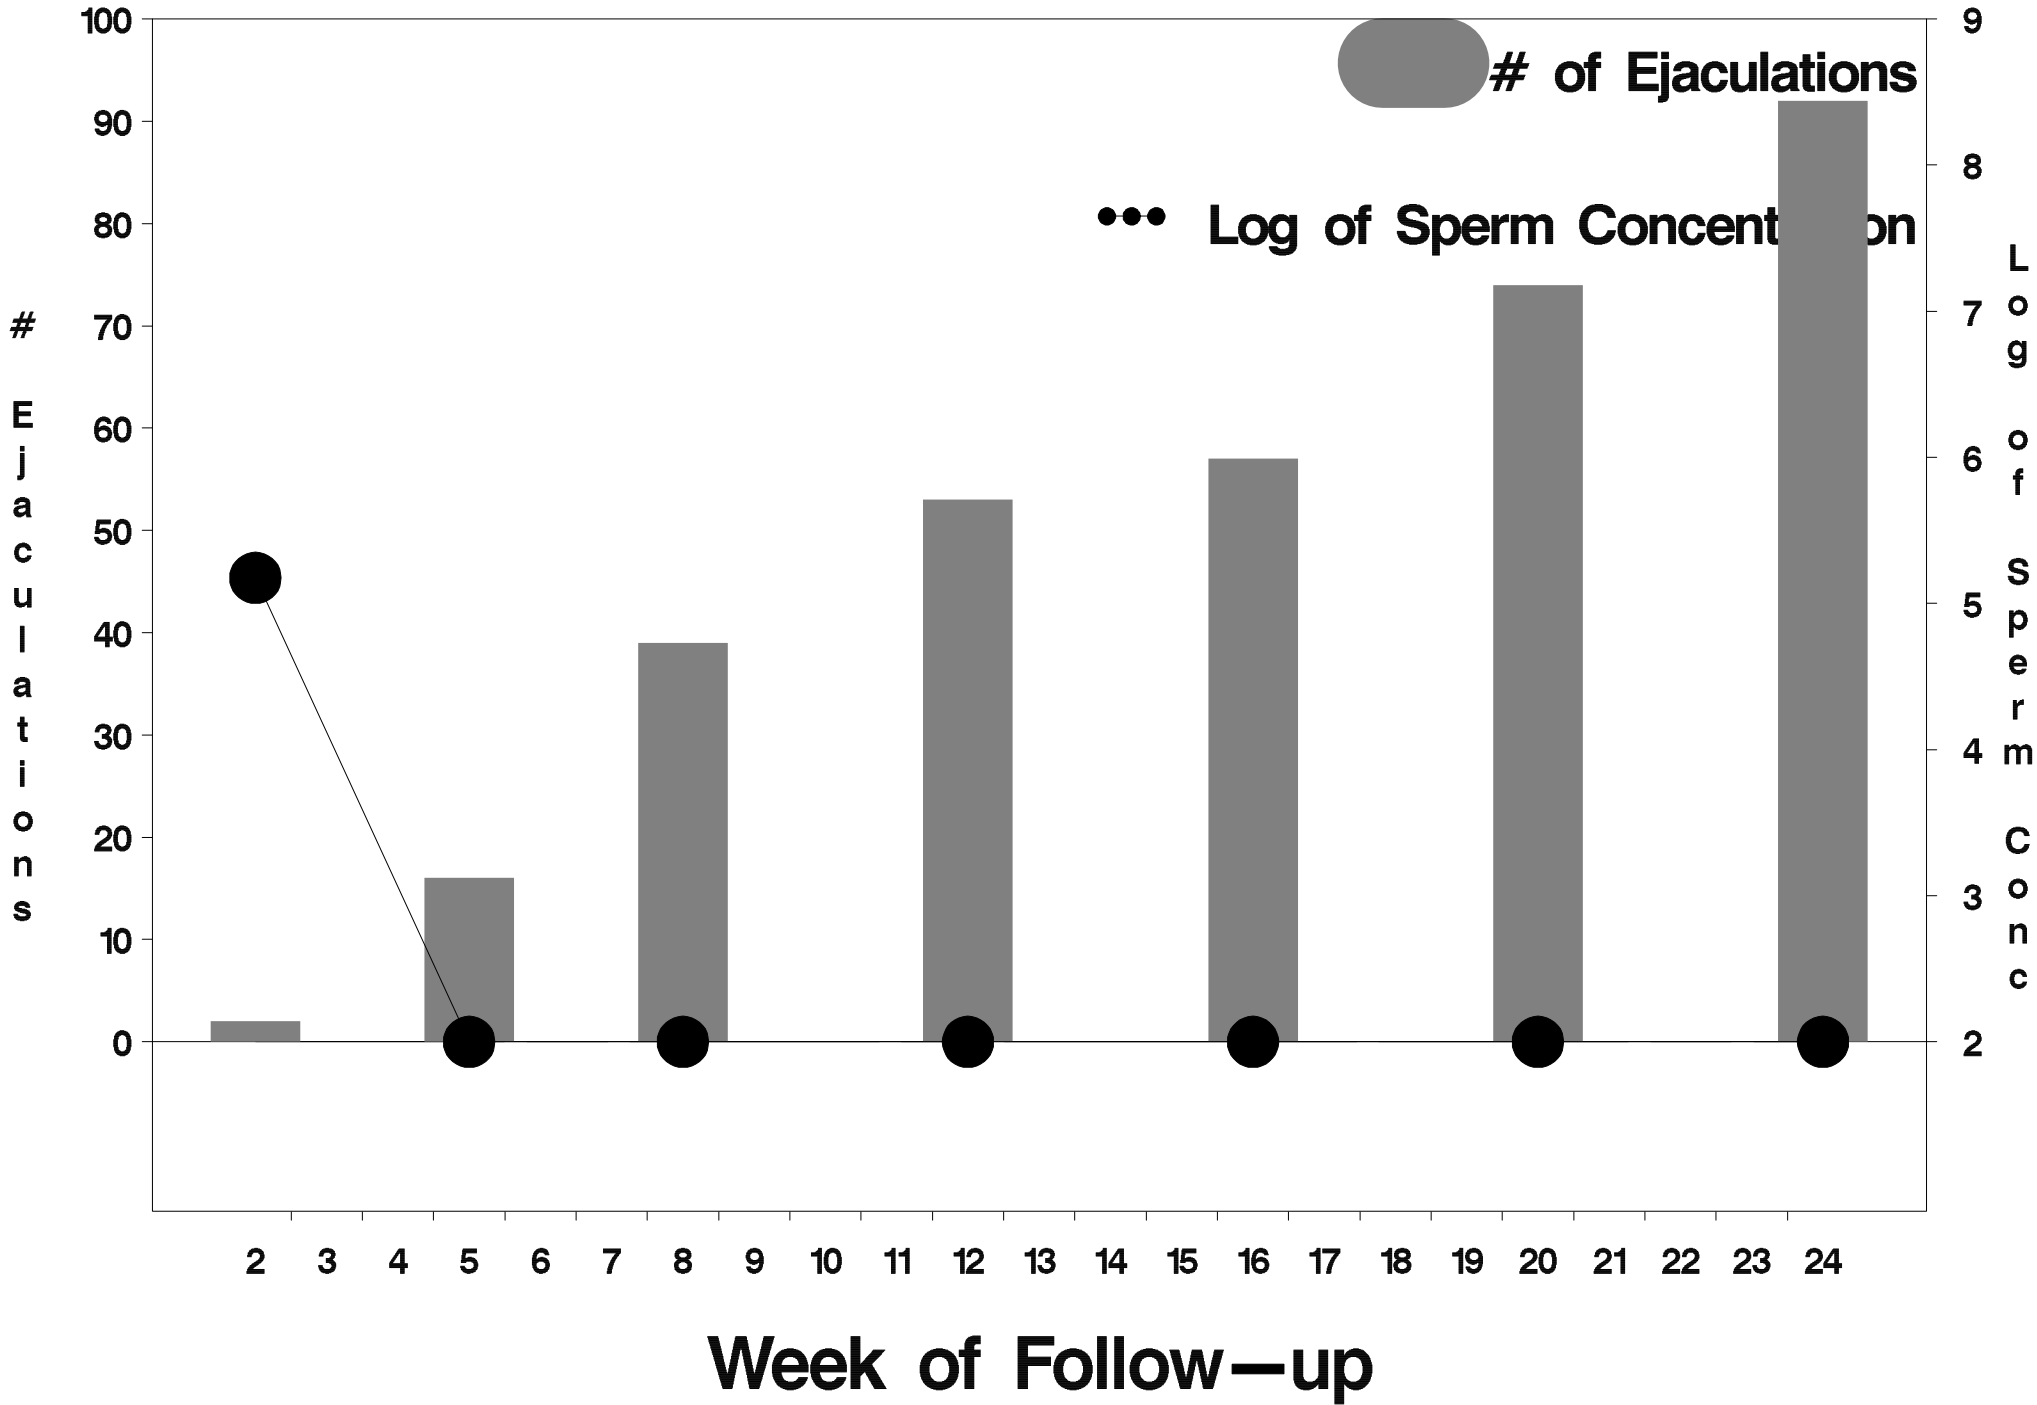

# Participant number= 192

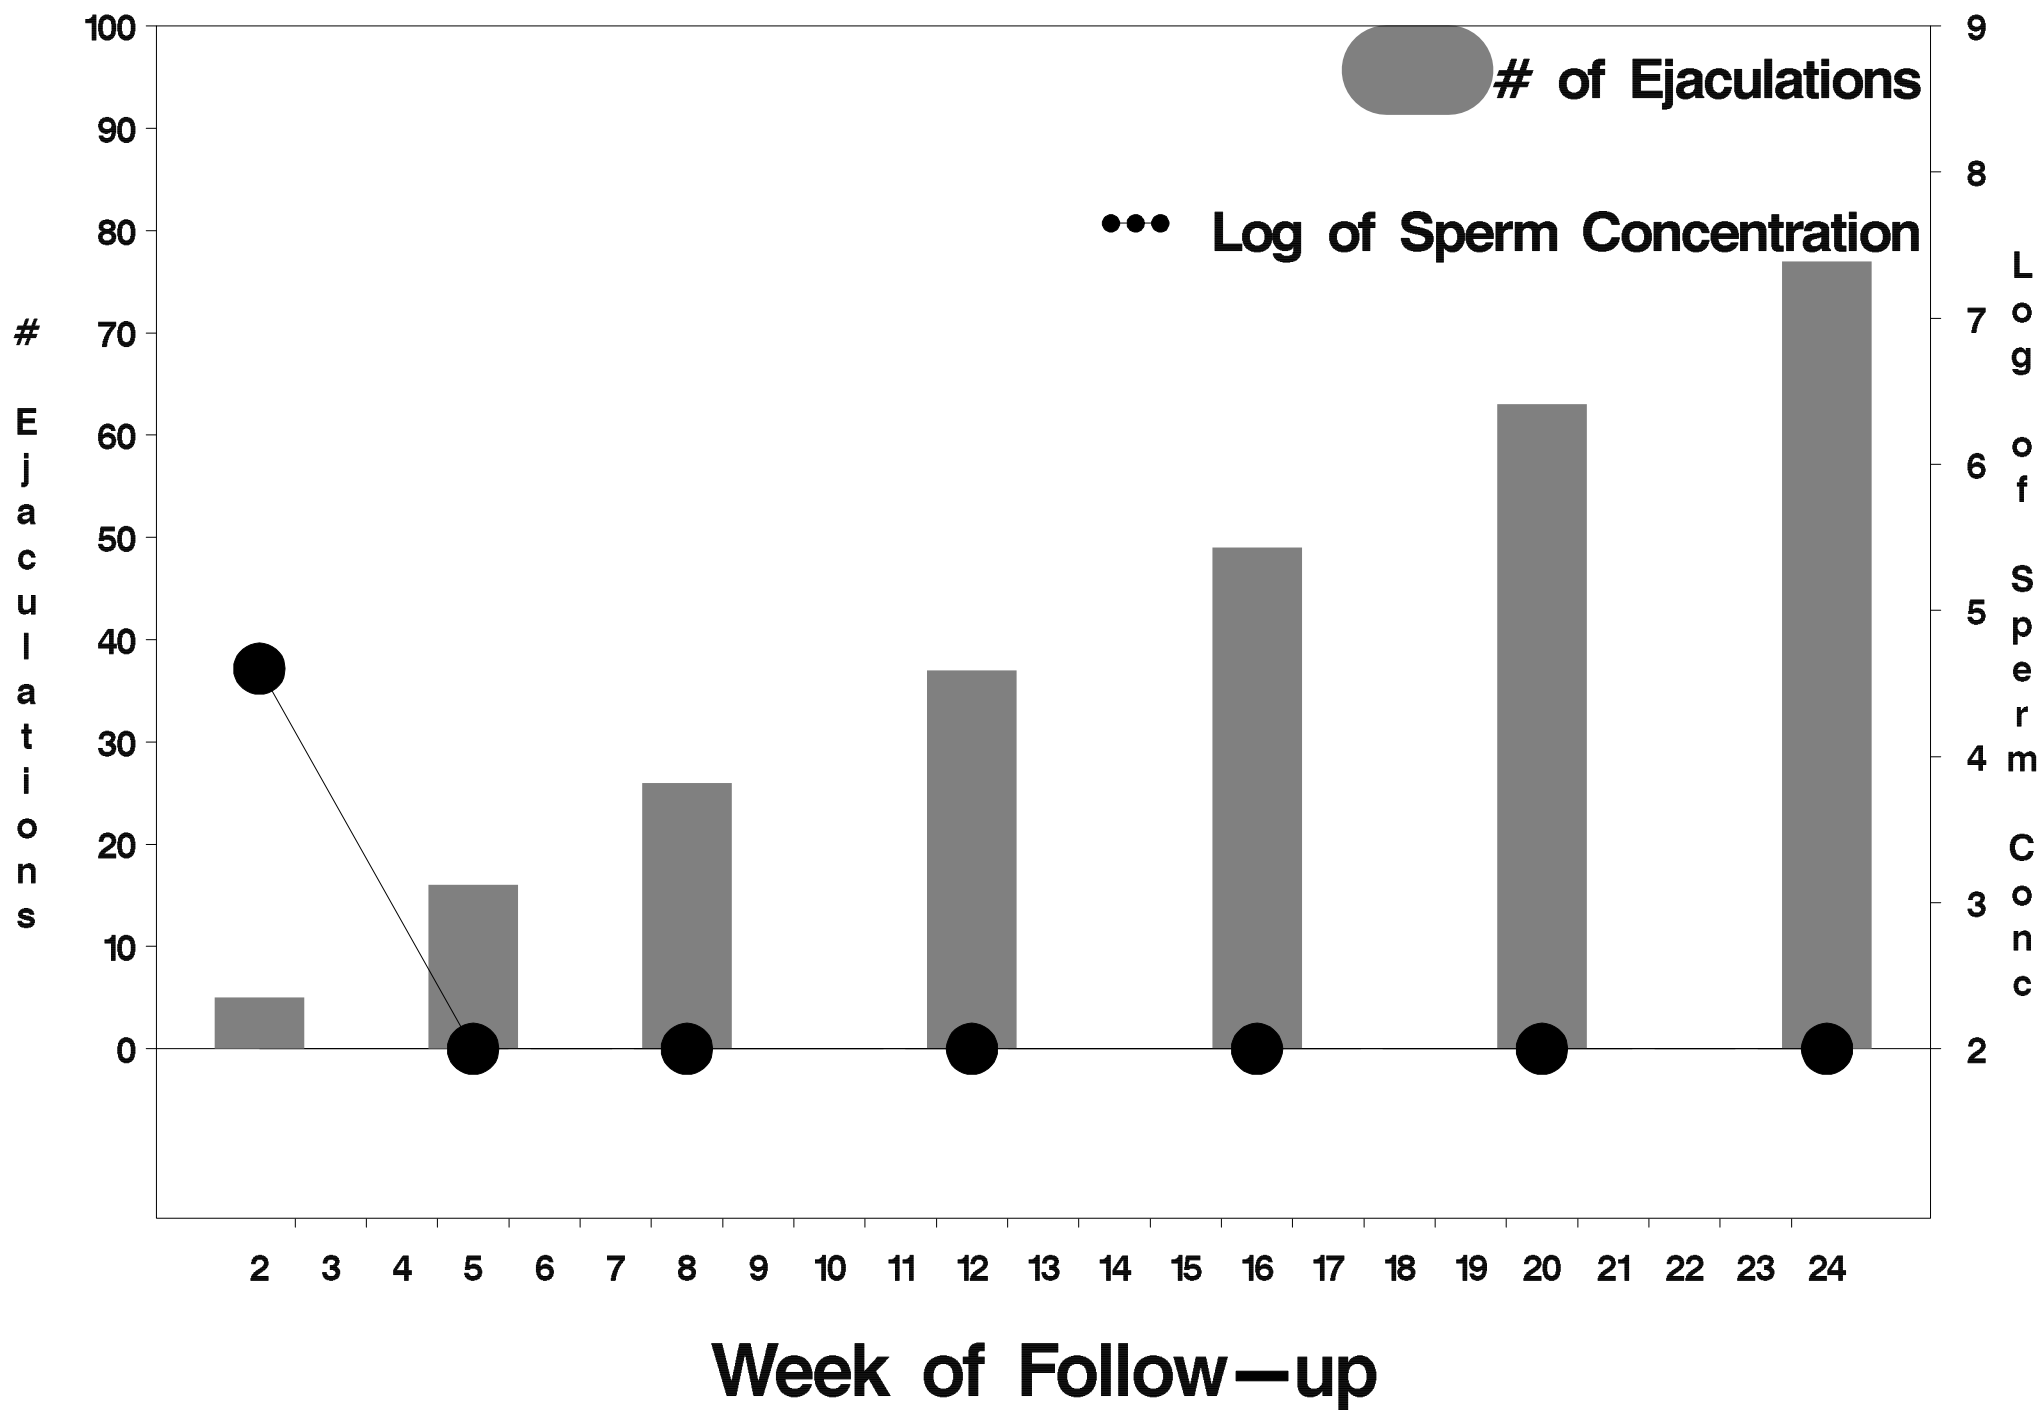

# Participant number= 193

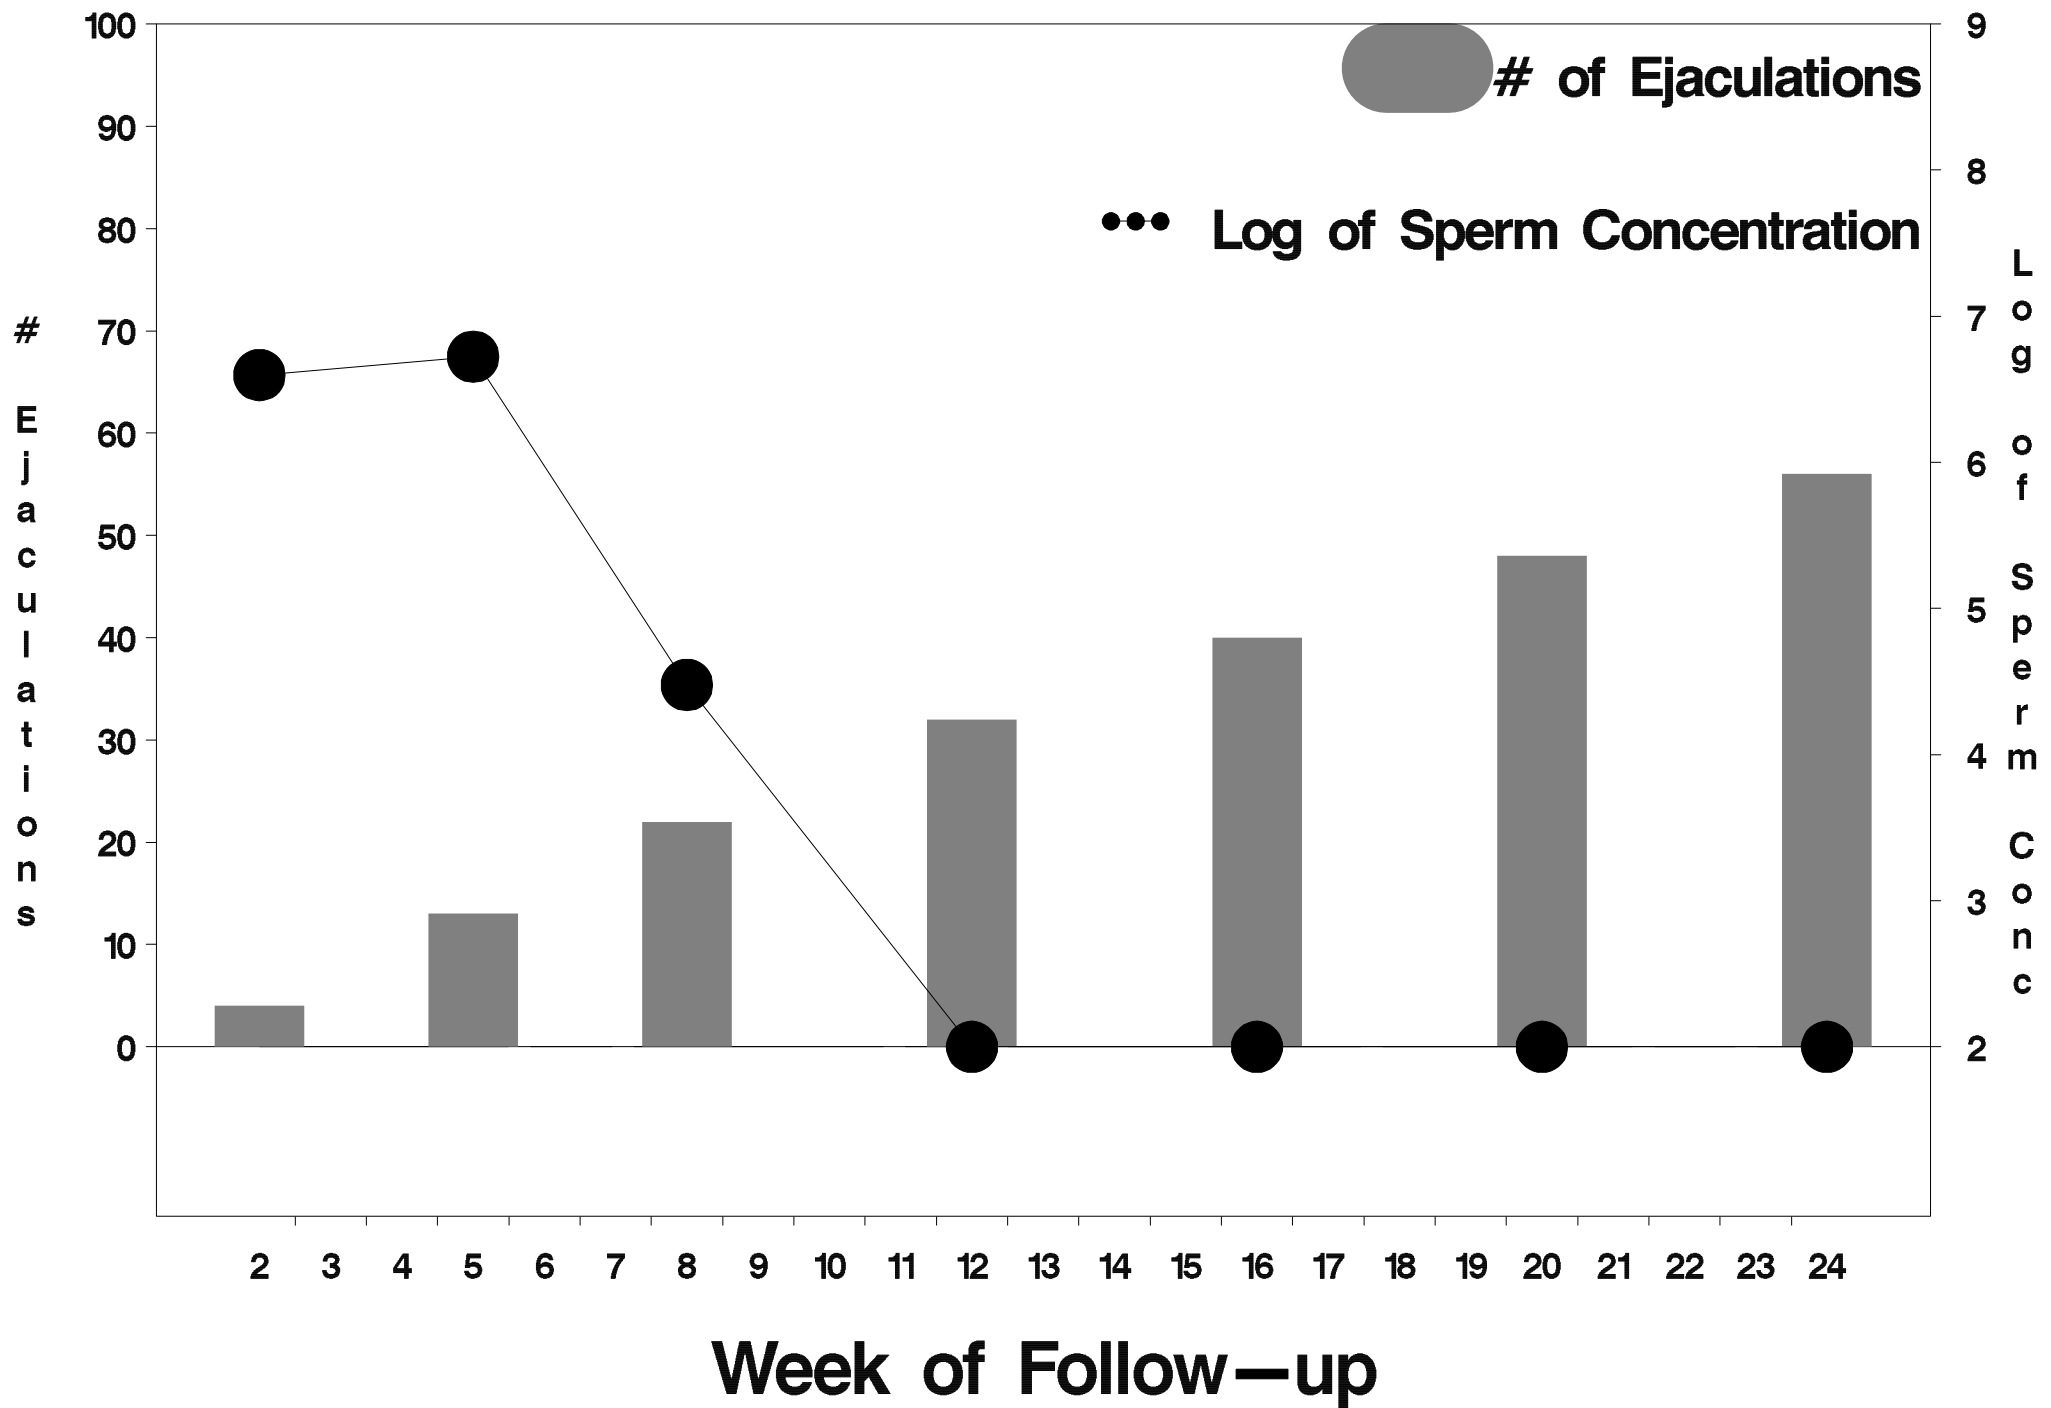

# Participant number= 194

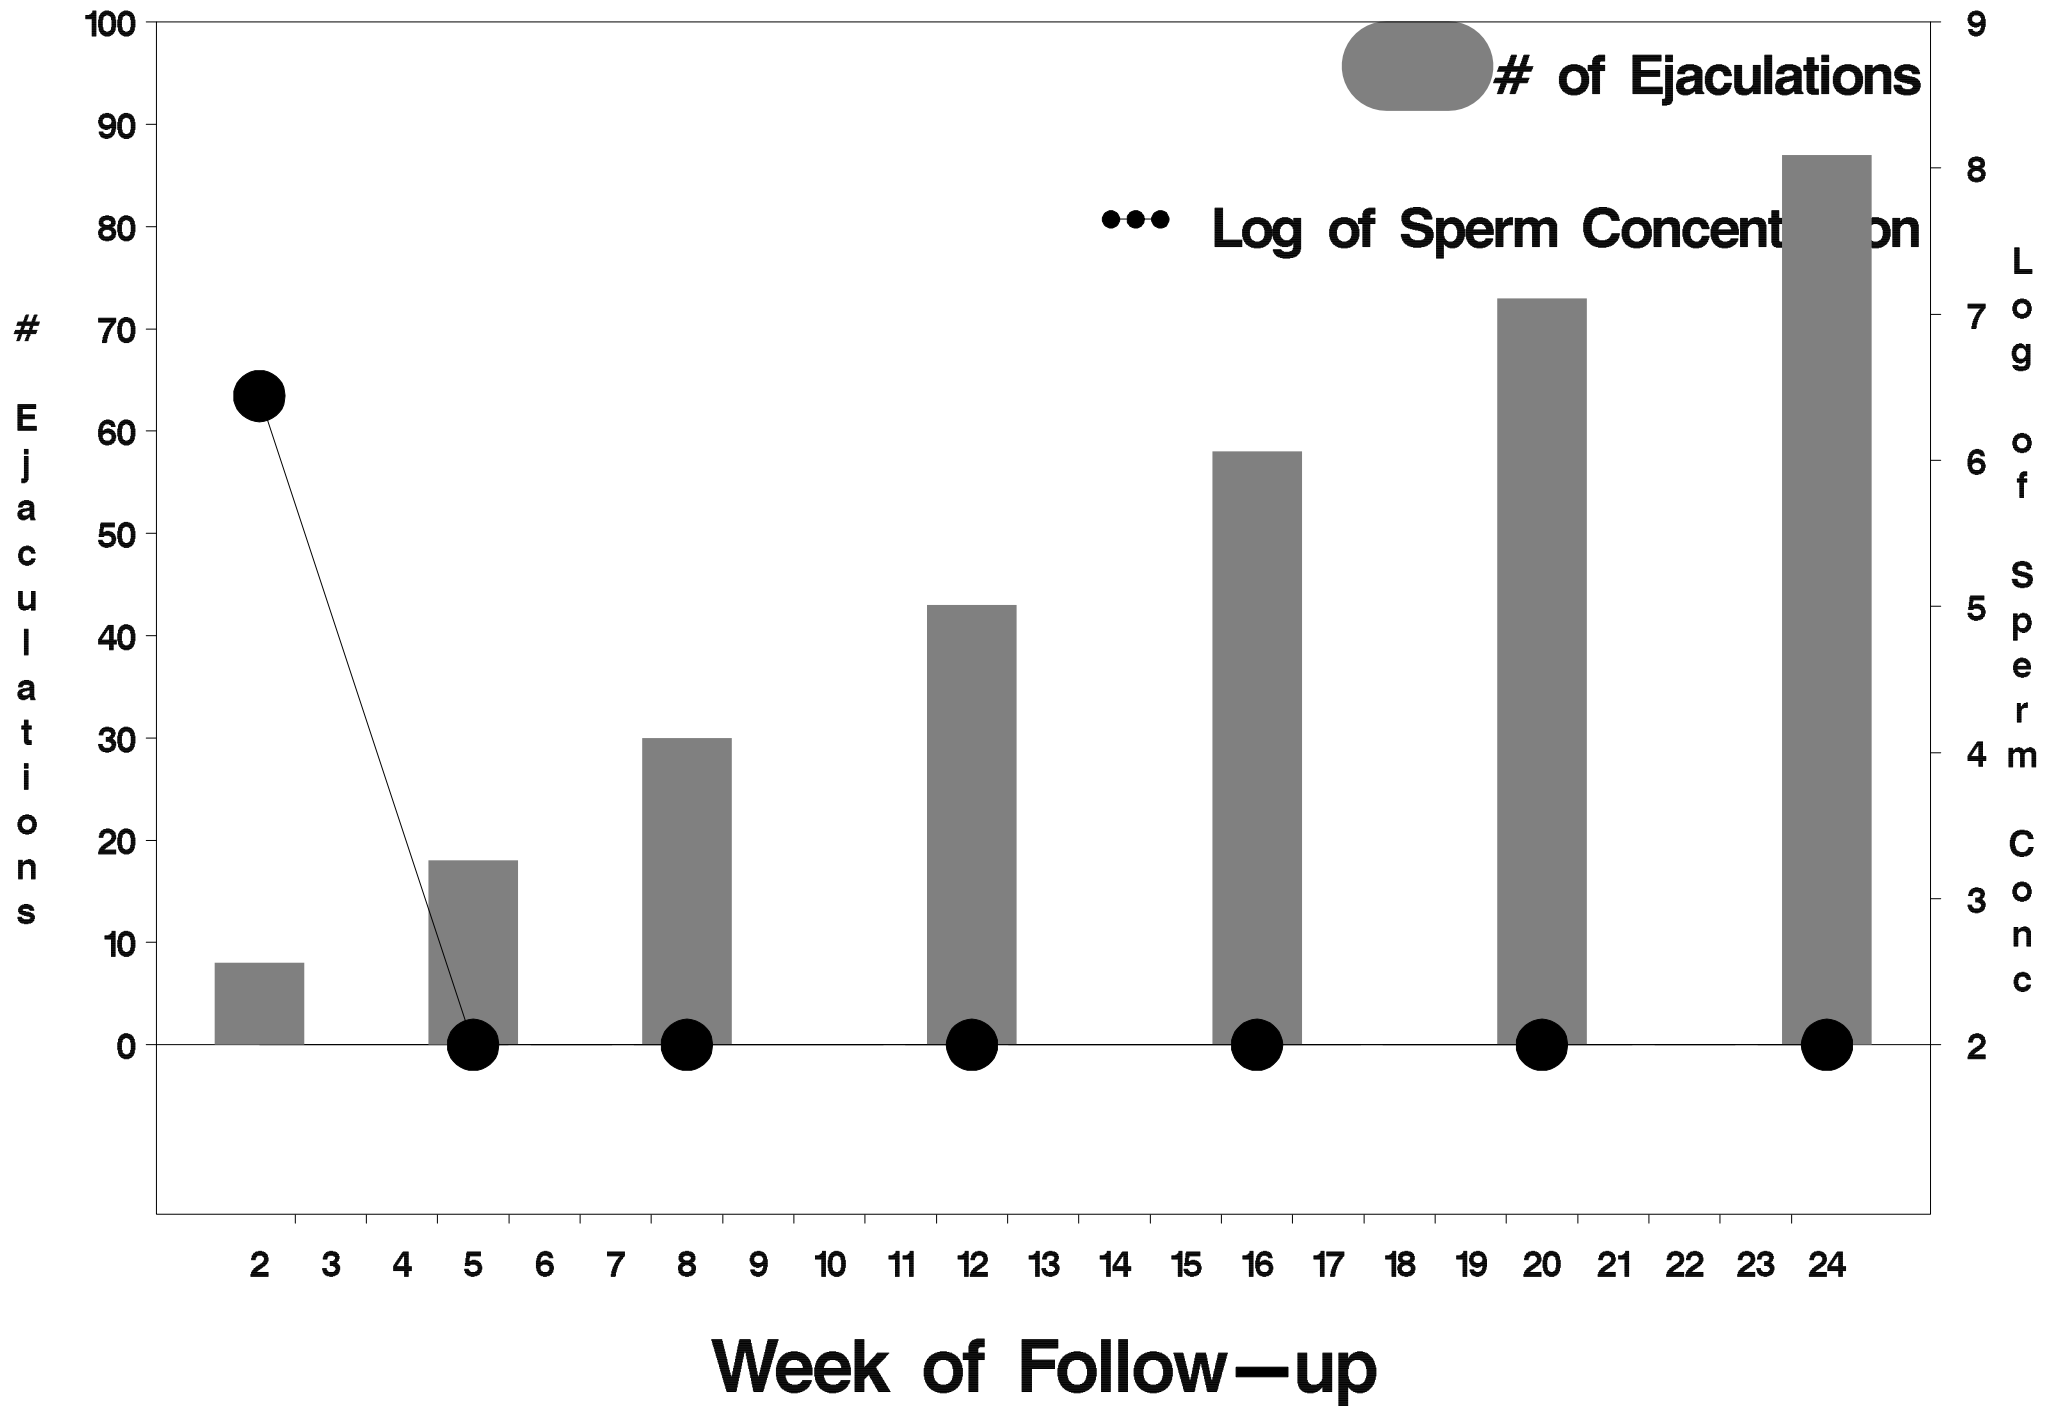

# Participant number= 195

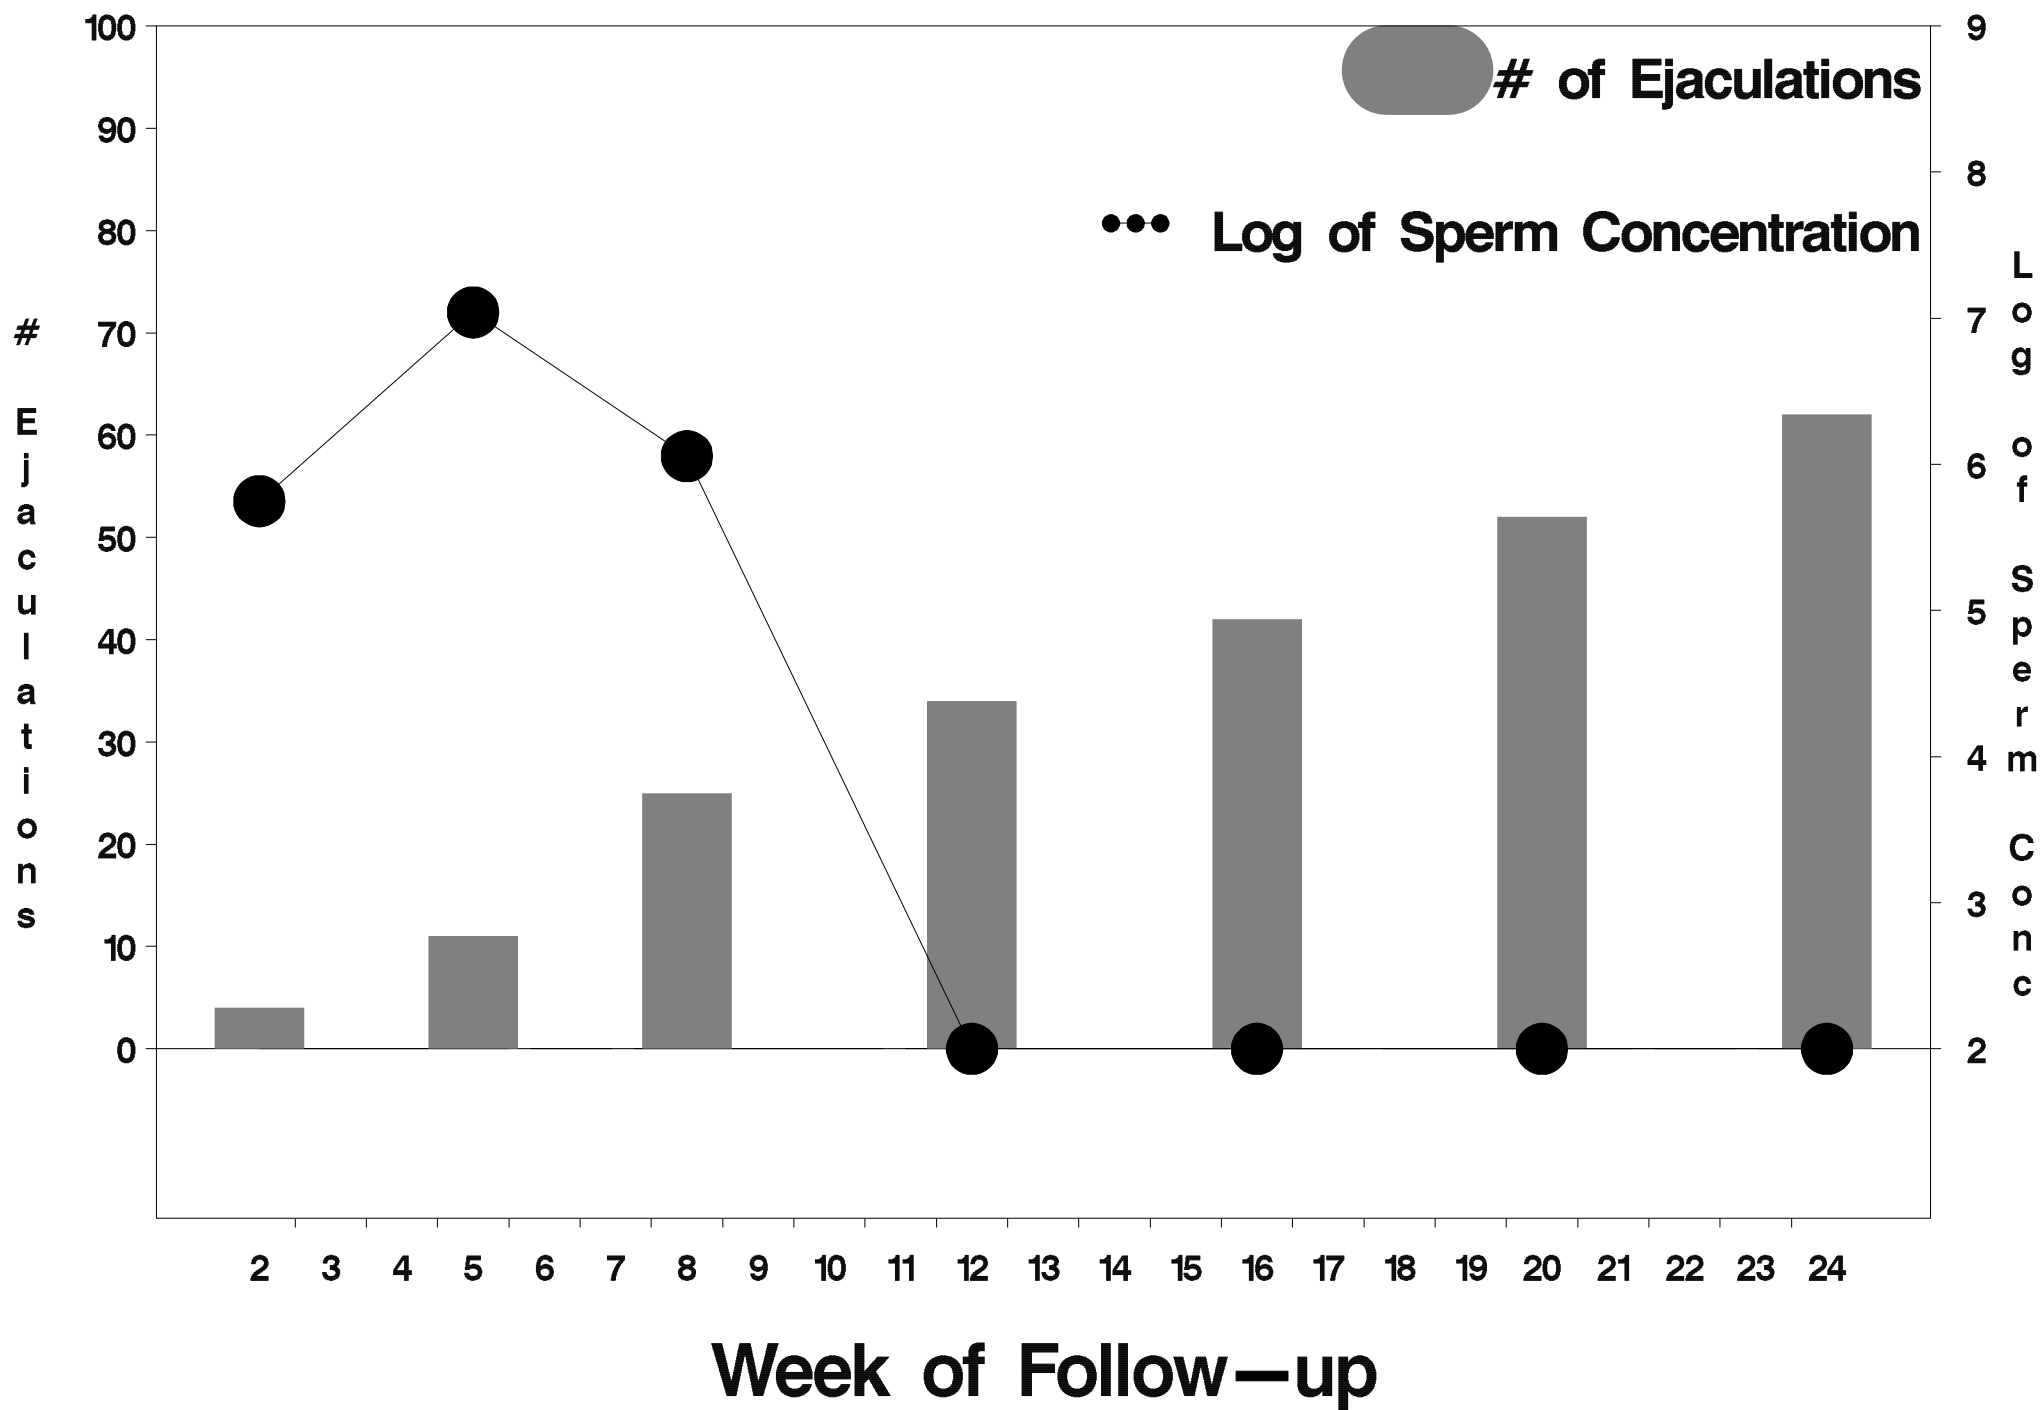

# Participant number= 196

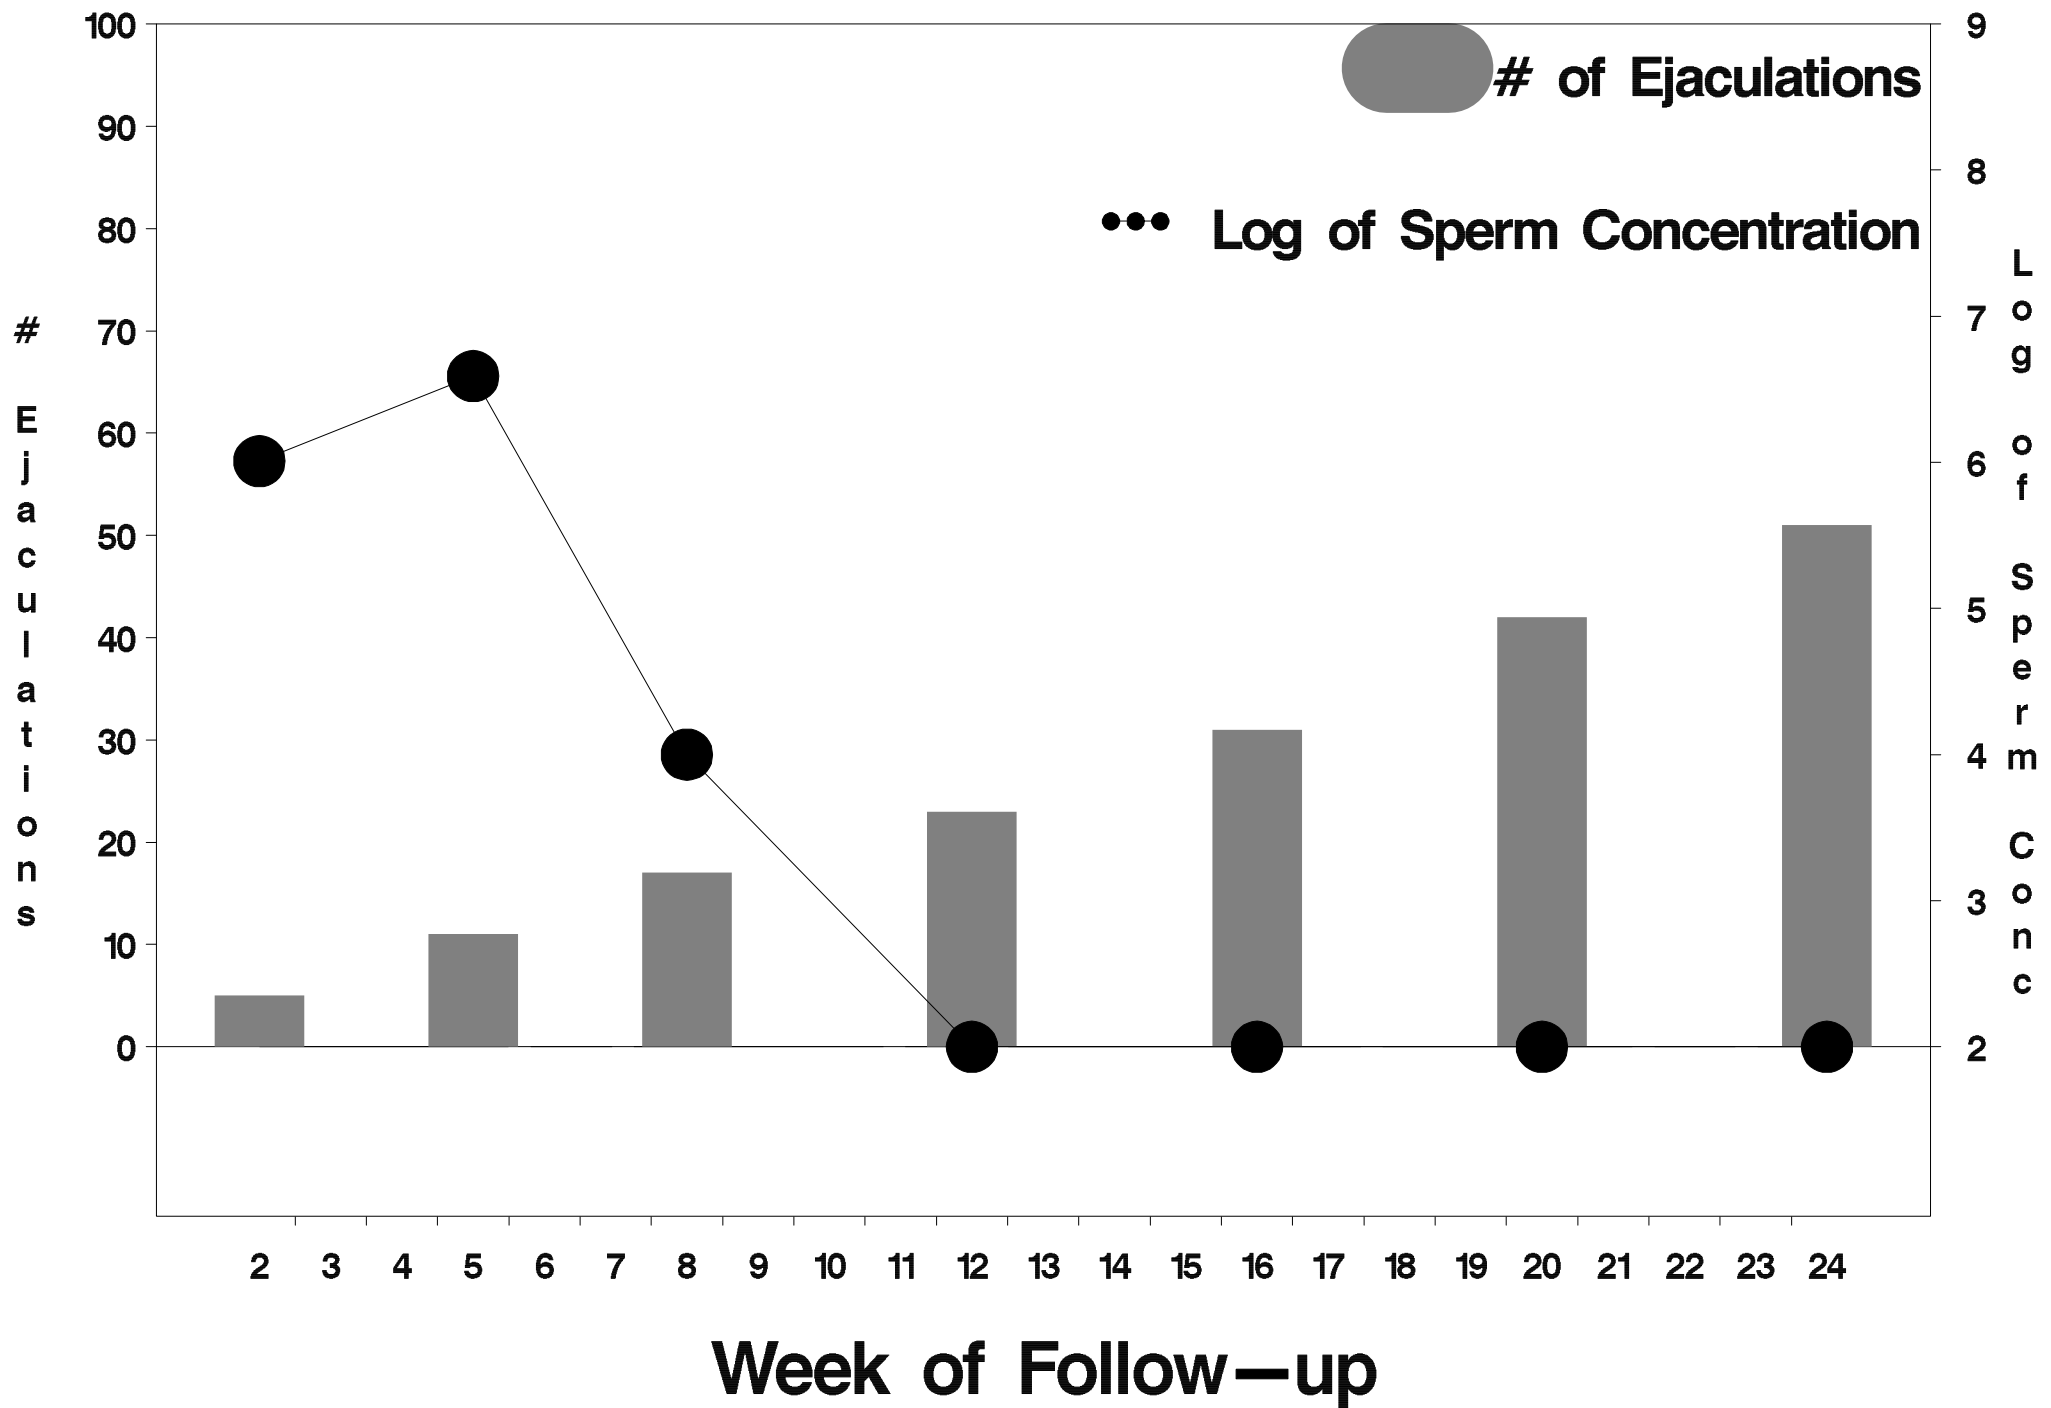



# Participant number= 197

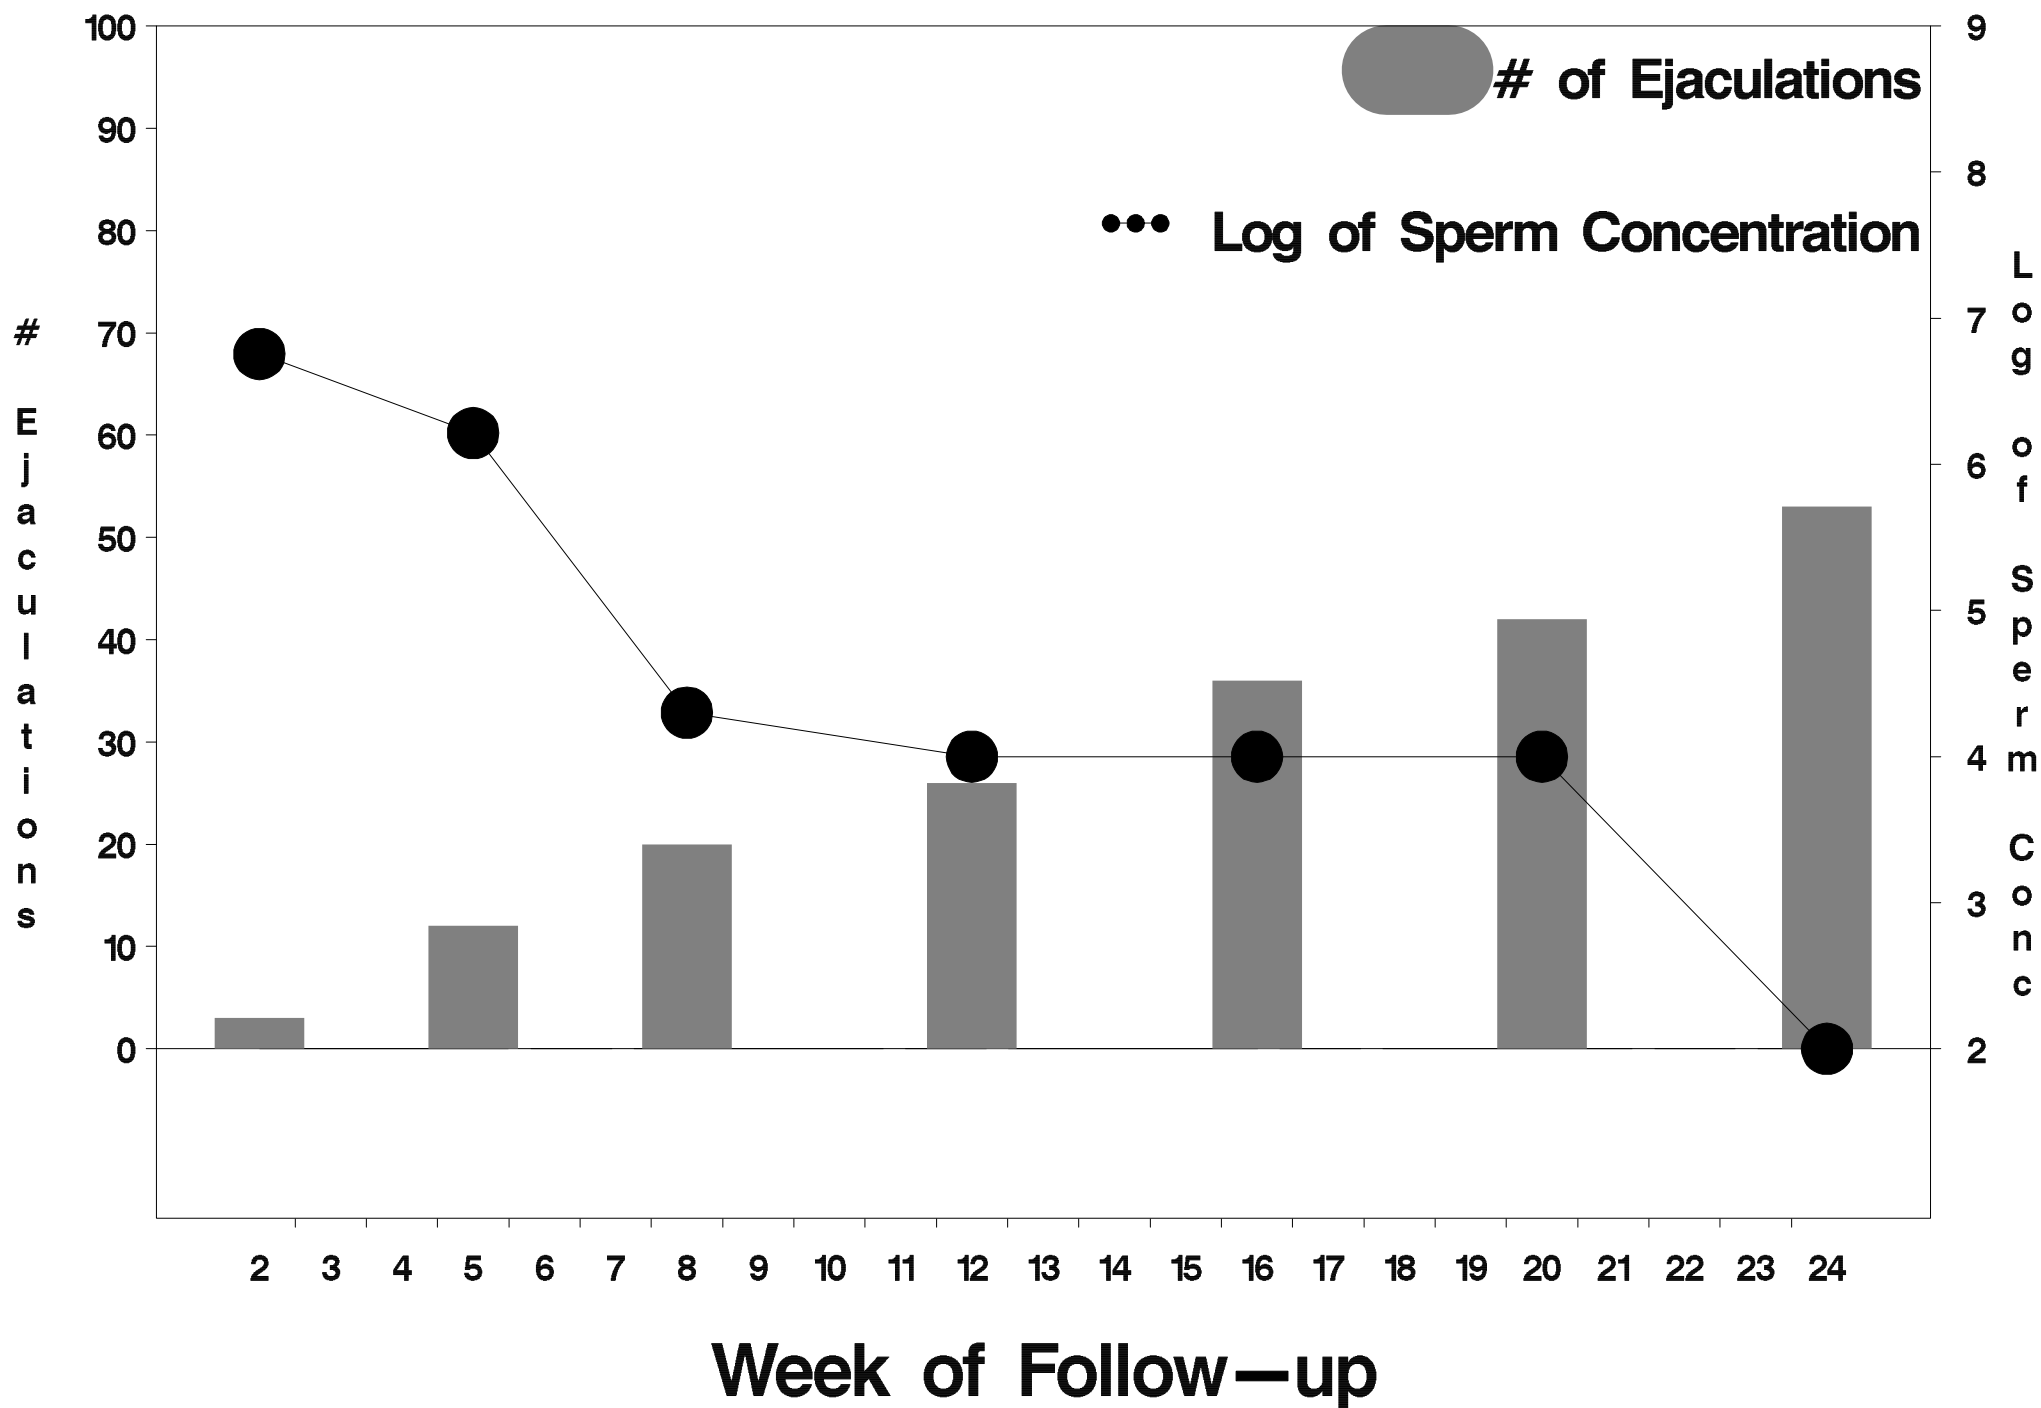

# Participant number= 198

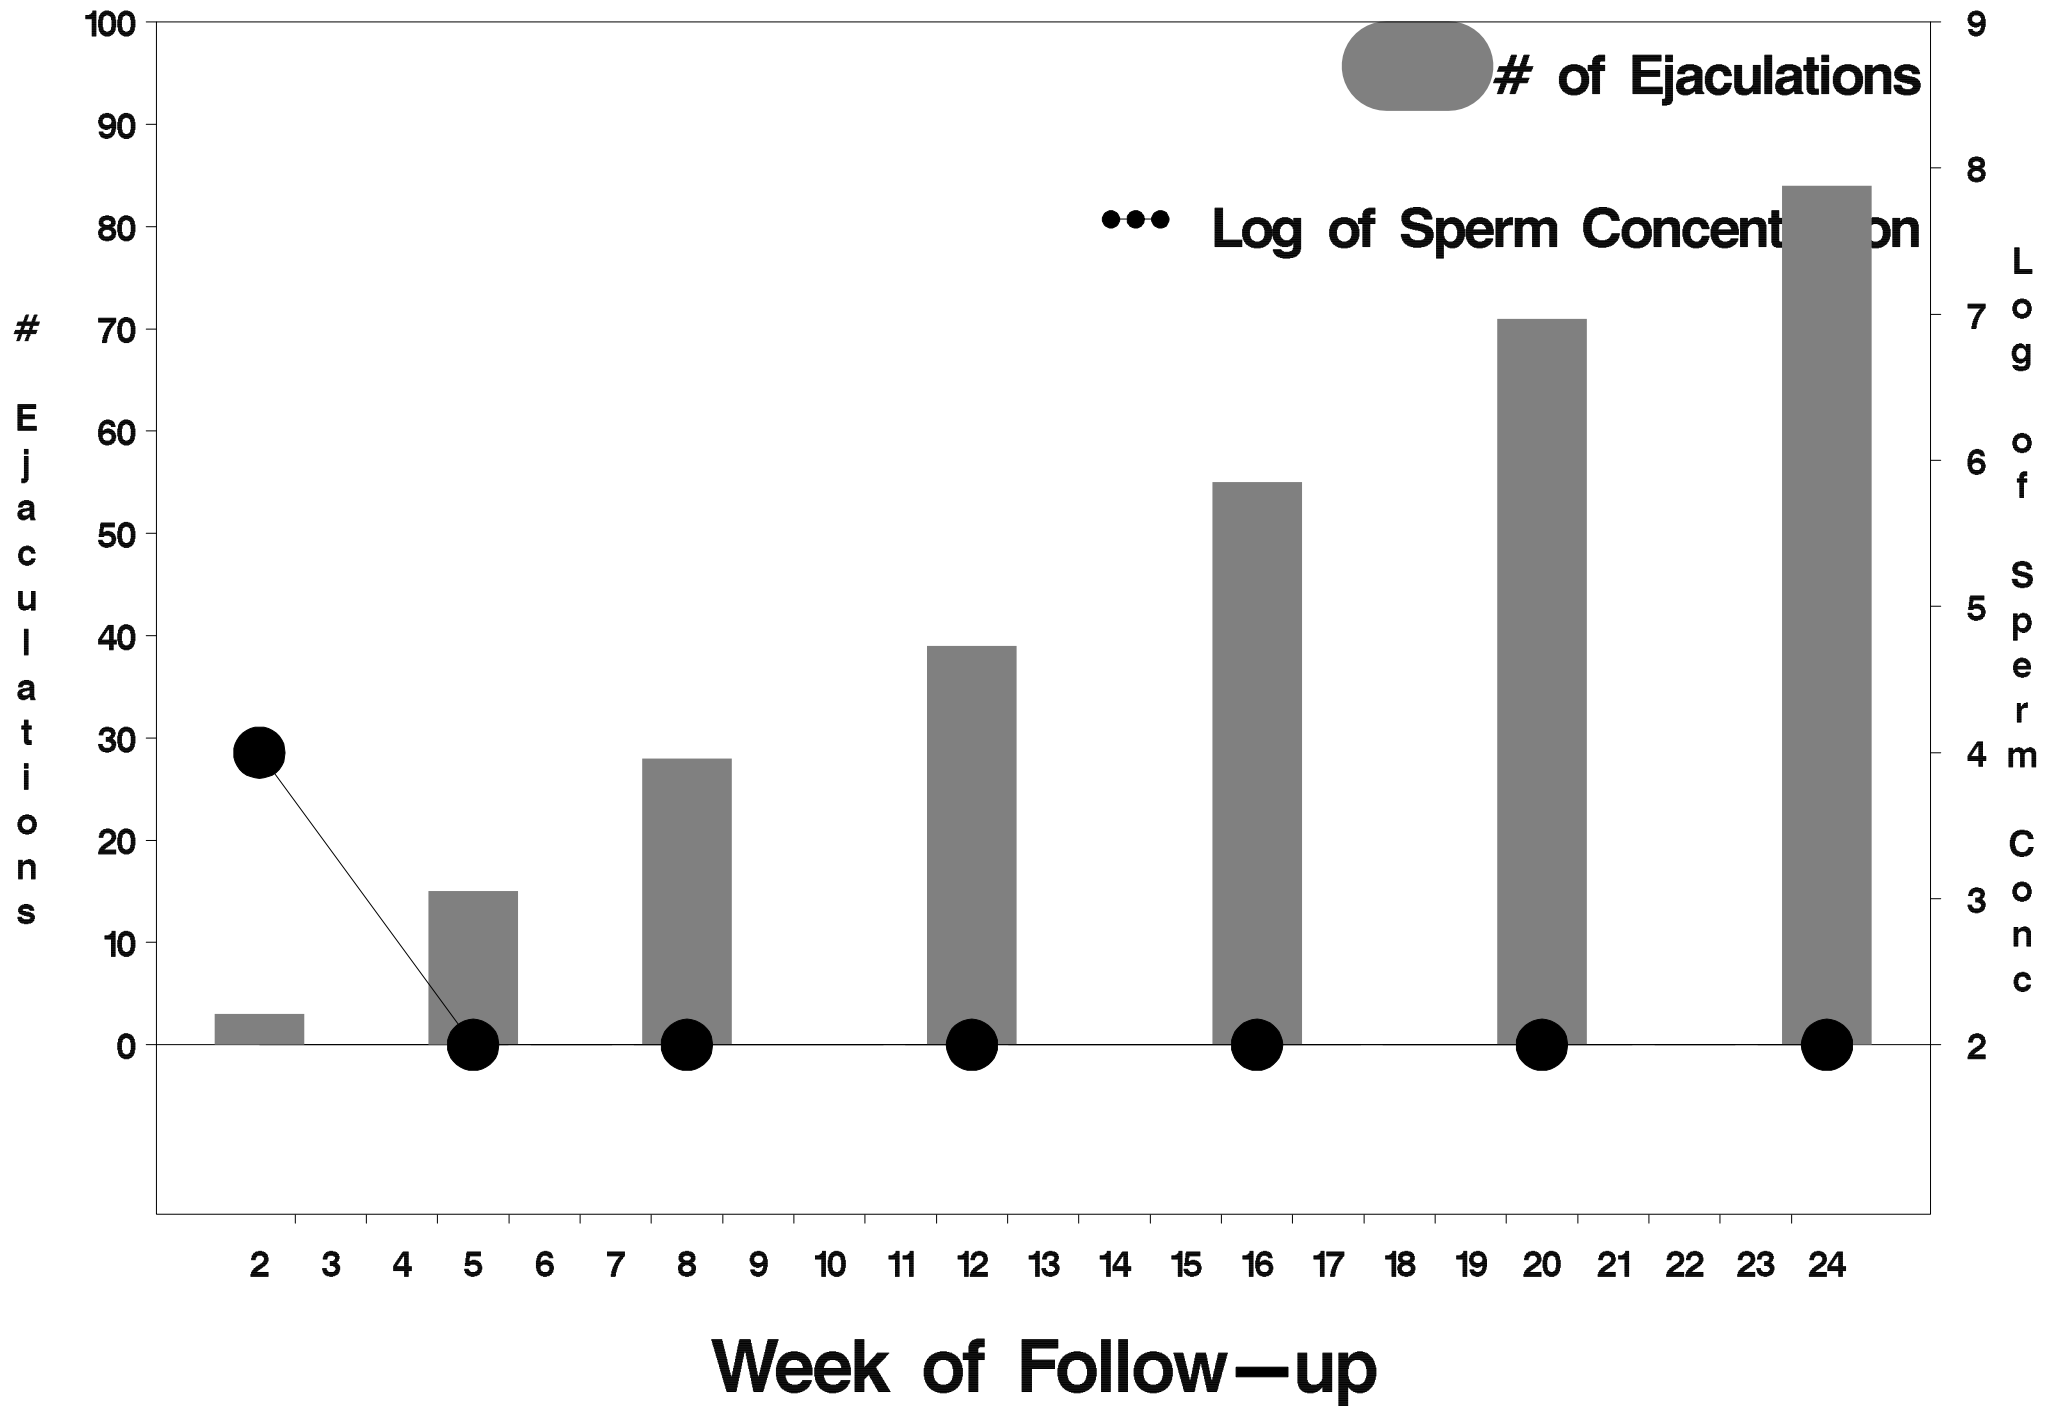

# Participant number= 199

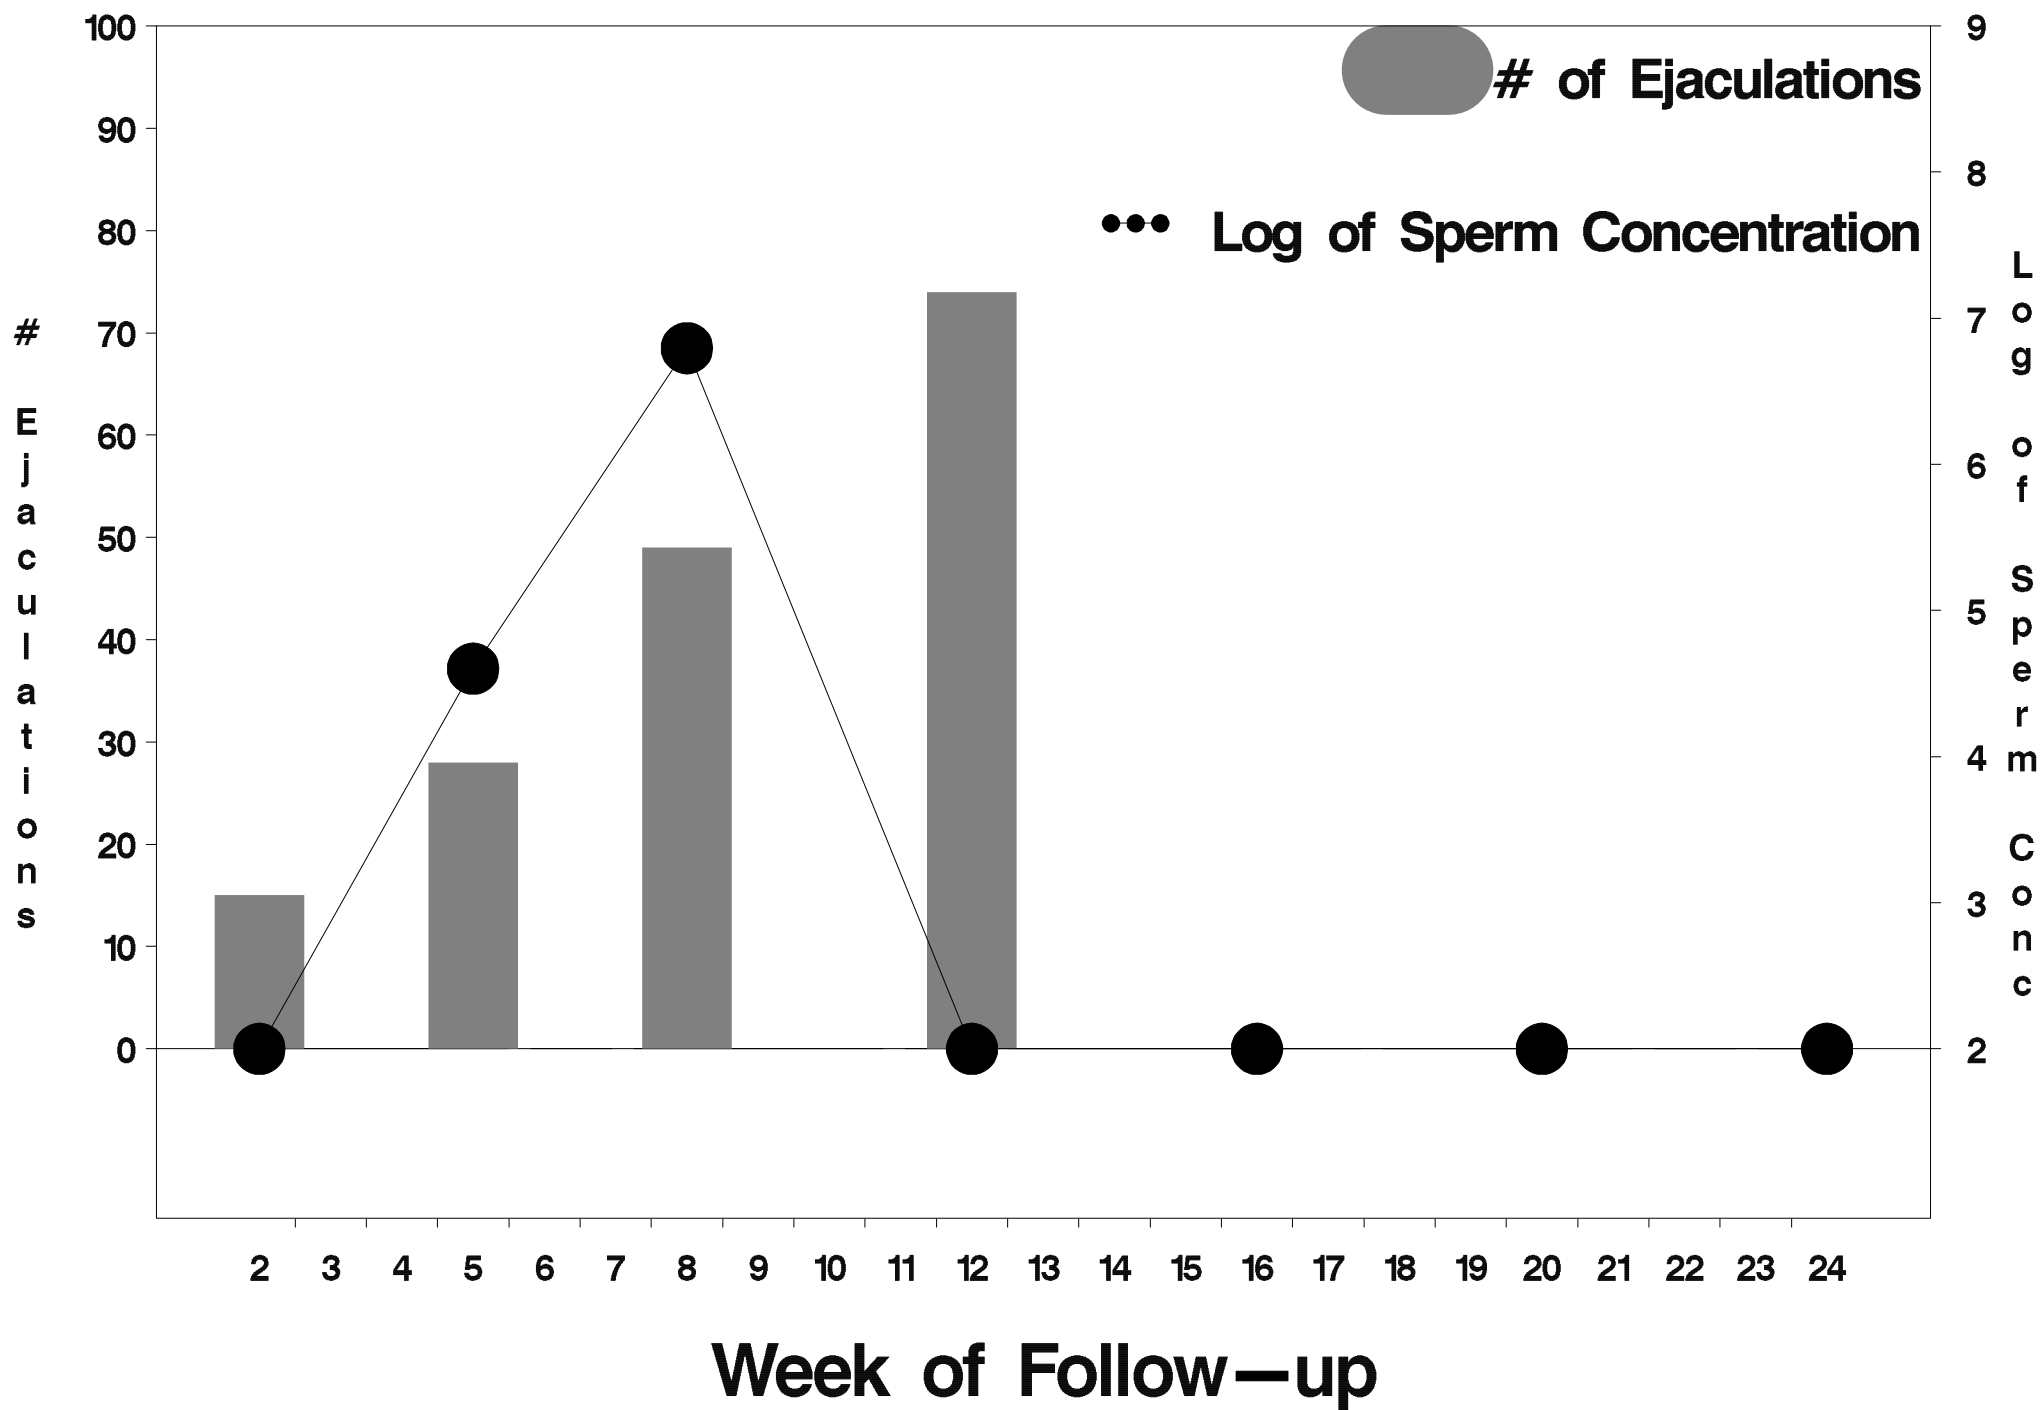

# Participant number= 200

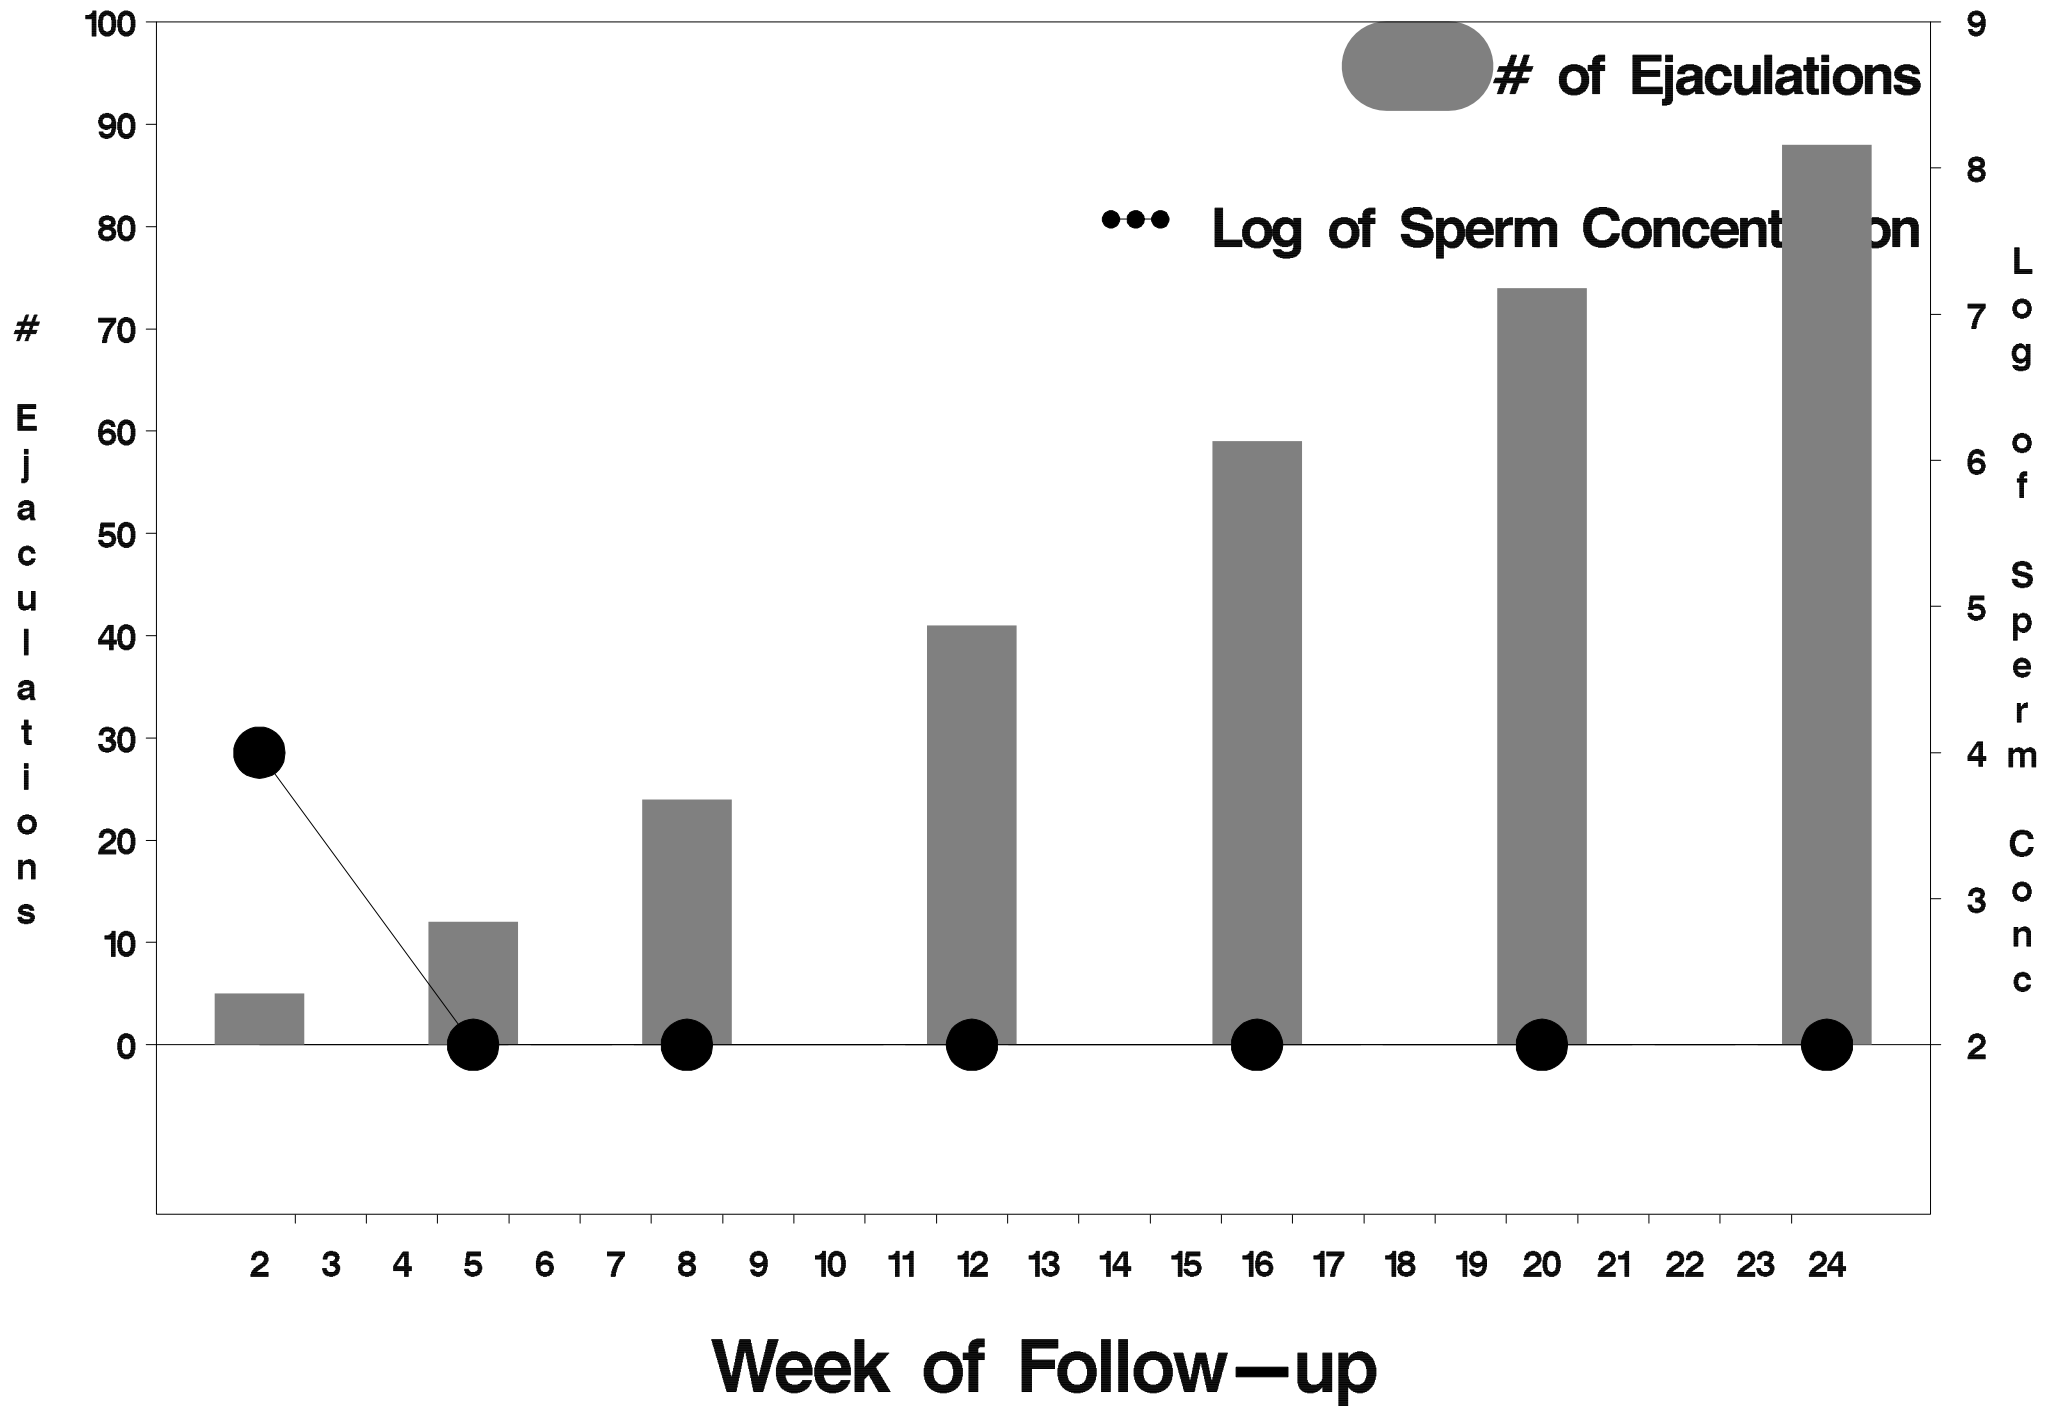

# Participant number= 301

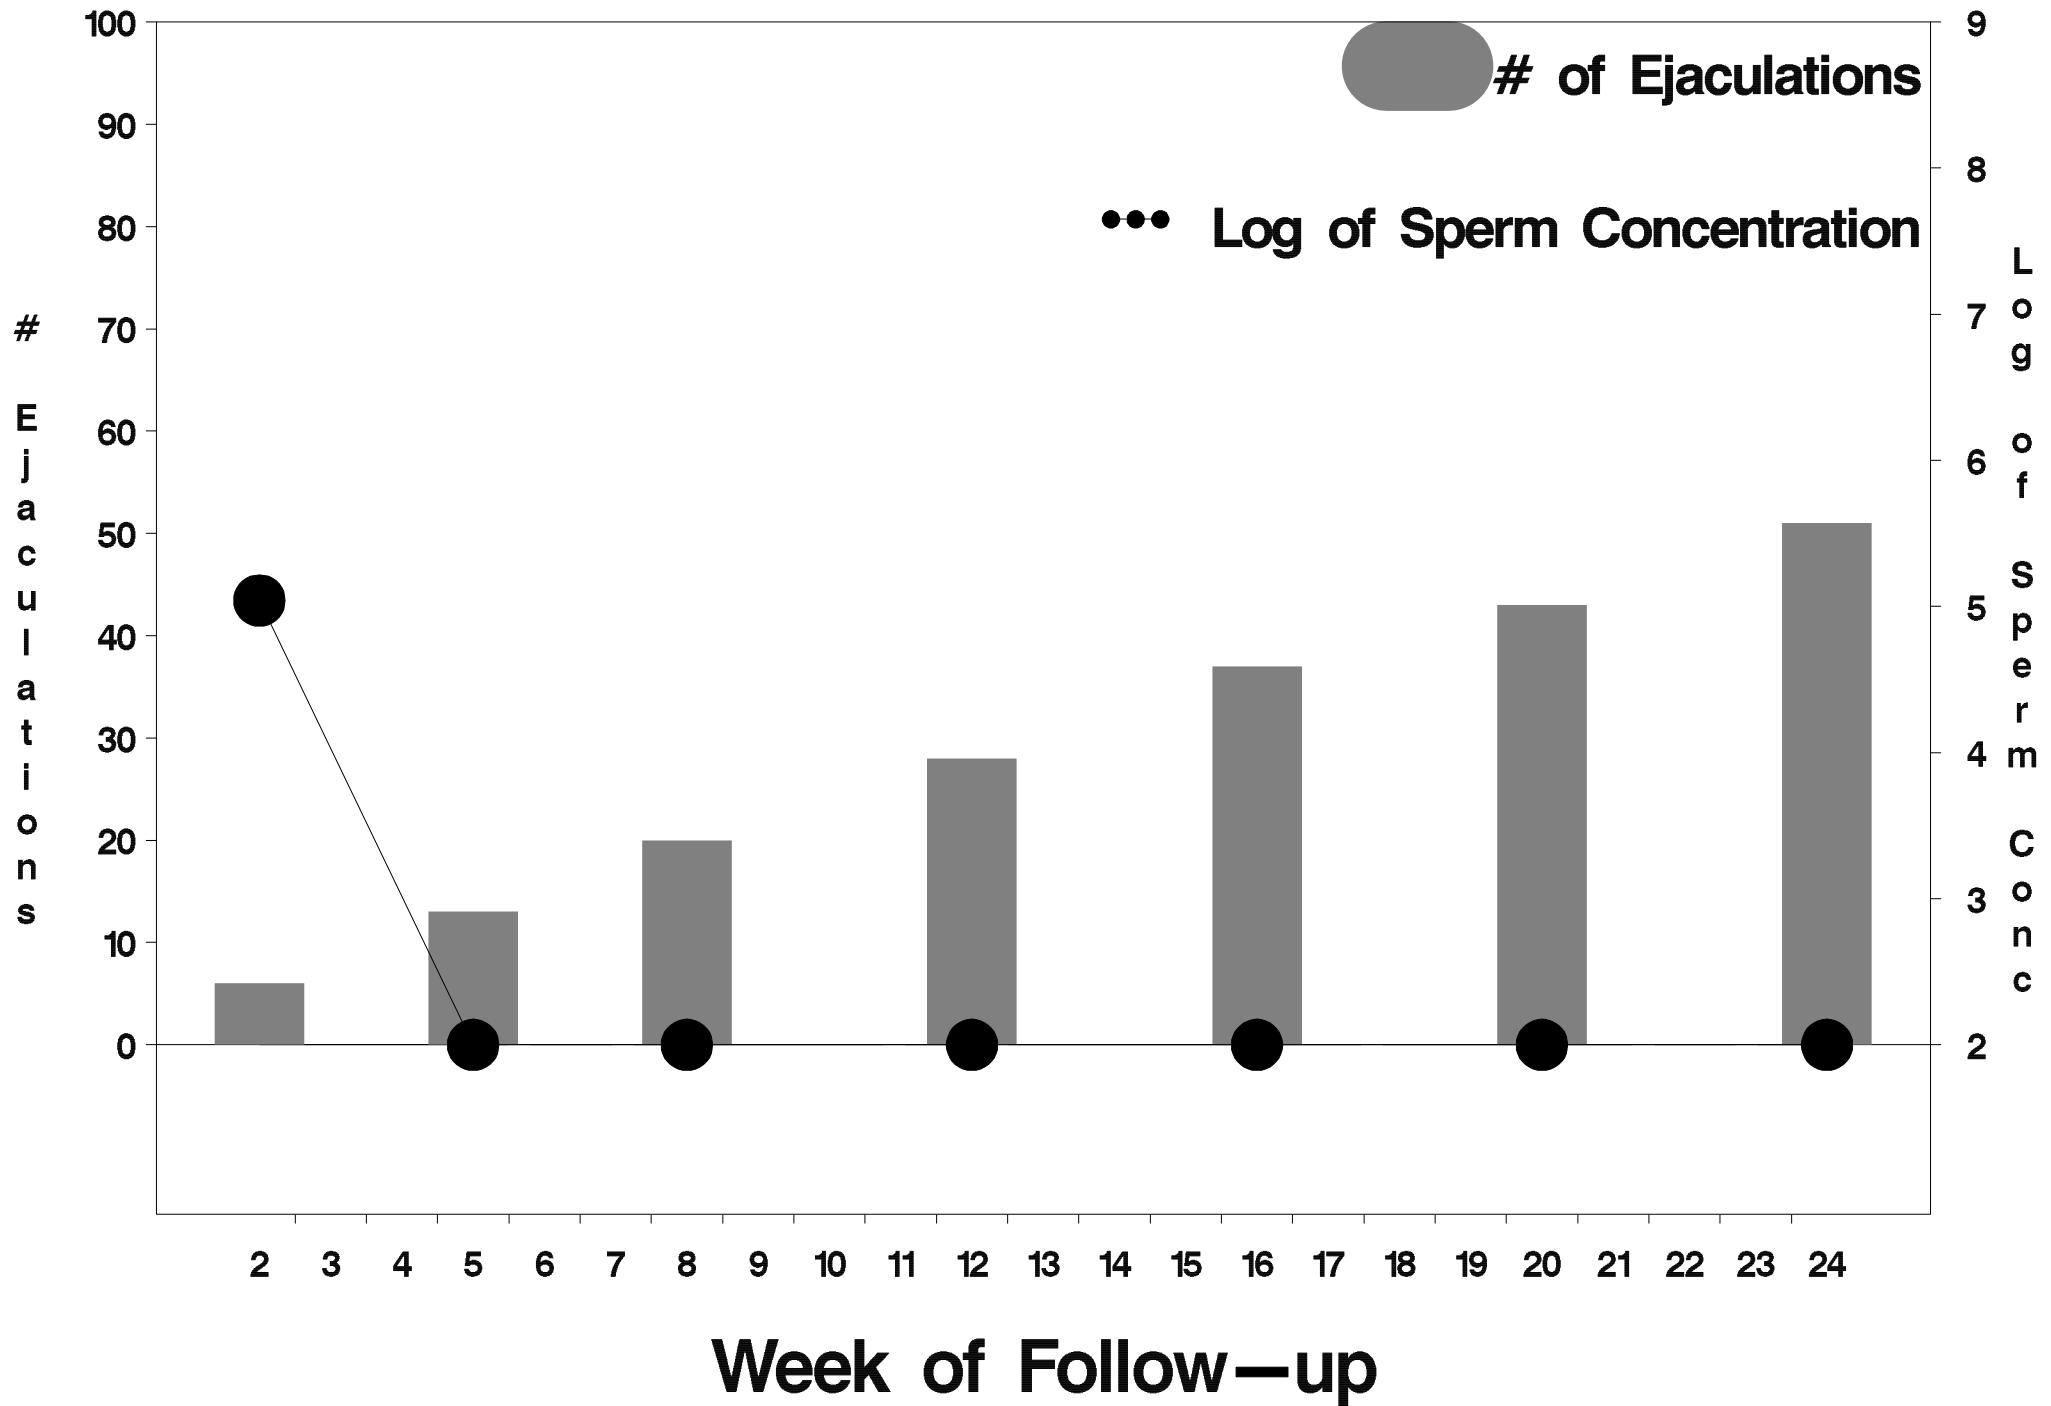

# Participant number= 302

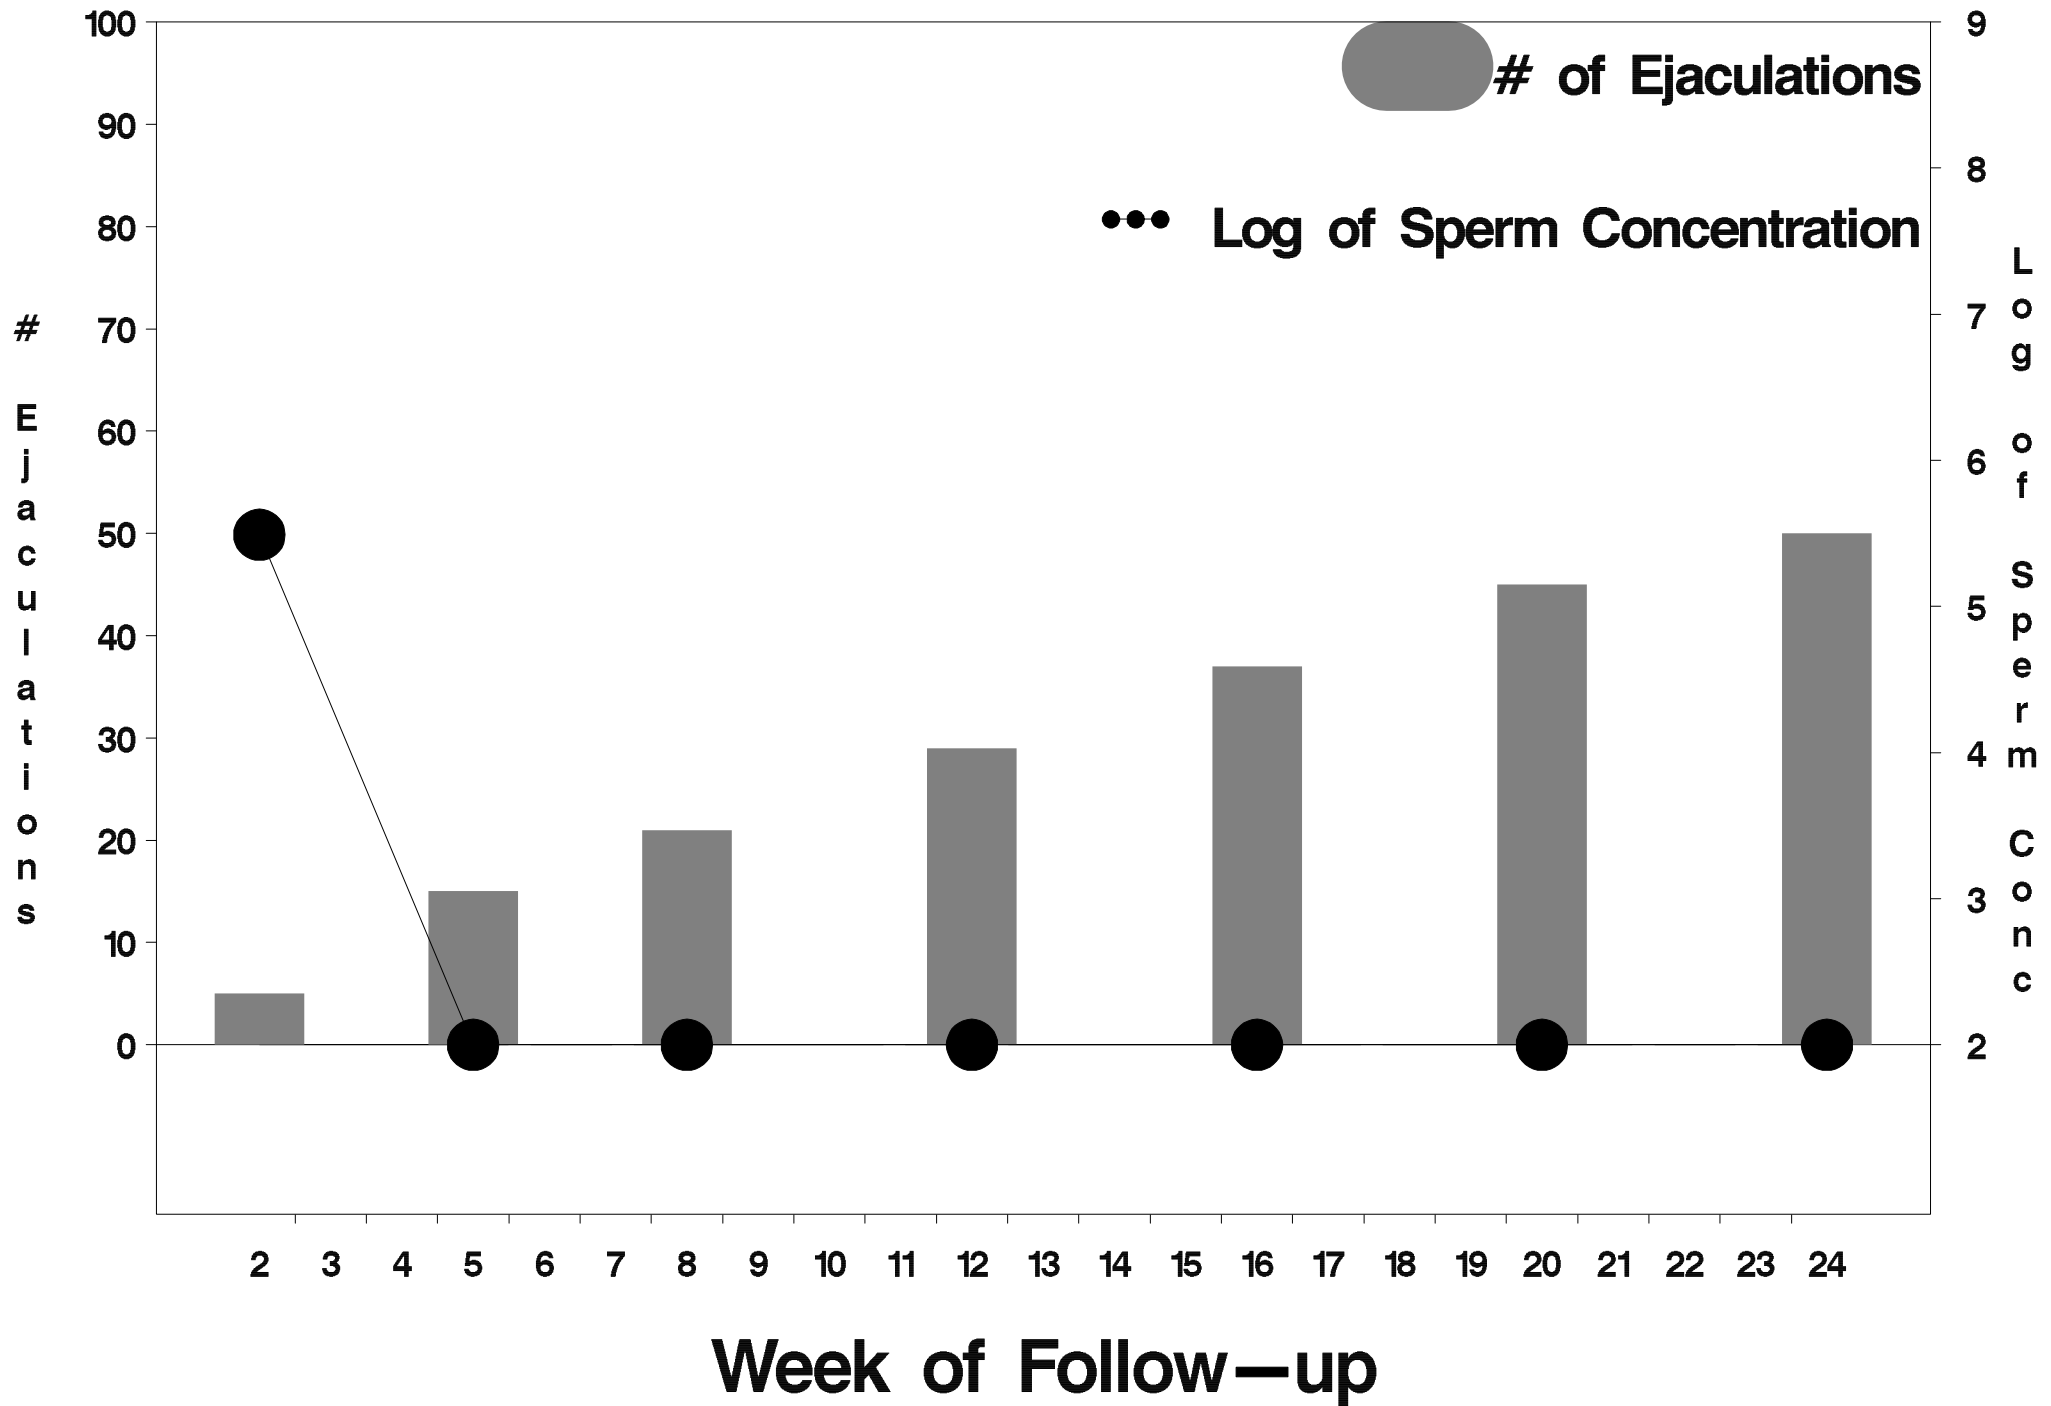

# Participant number= 303

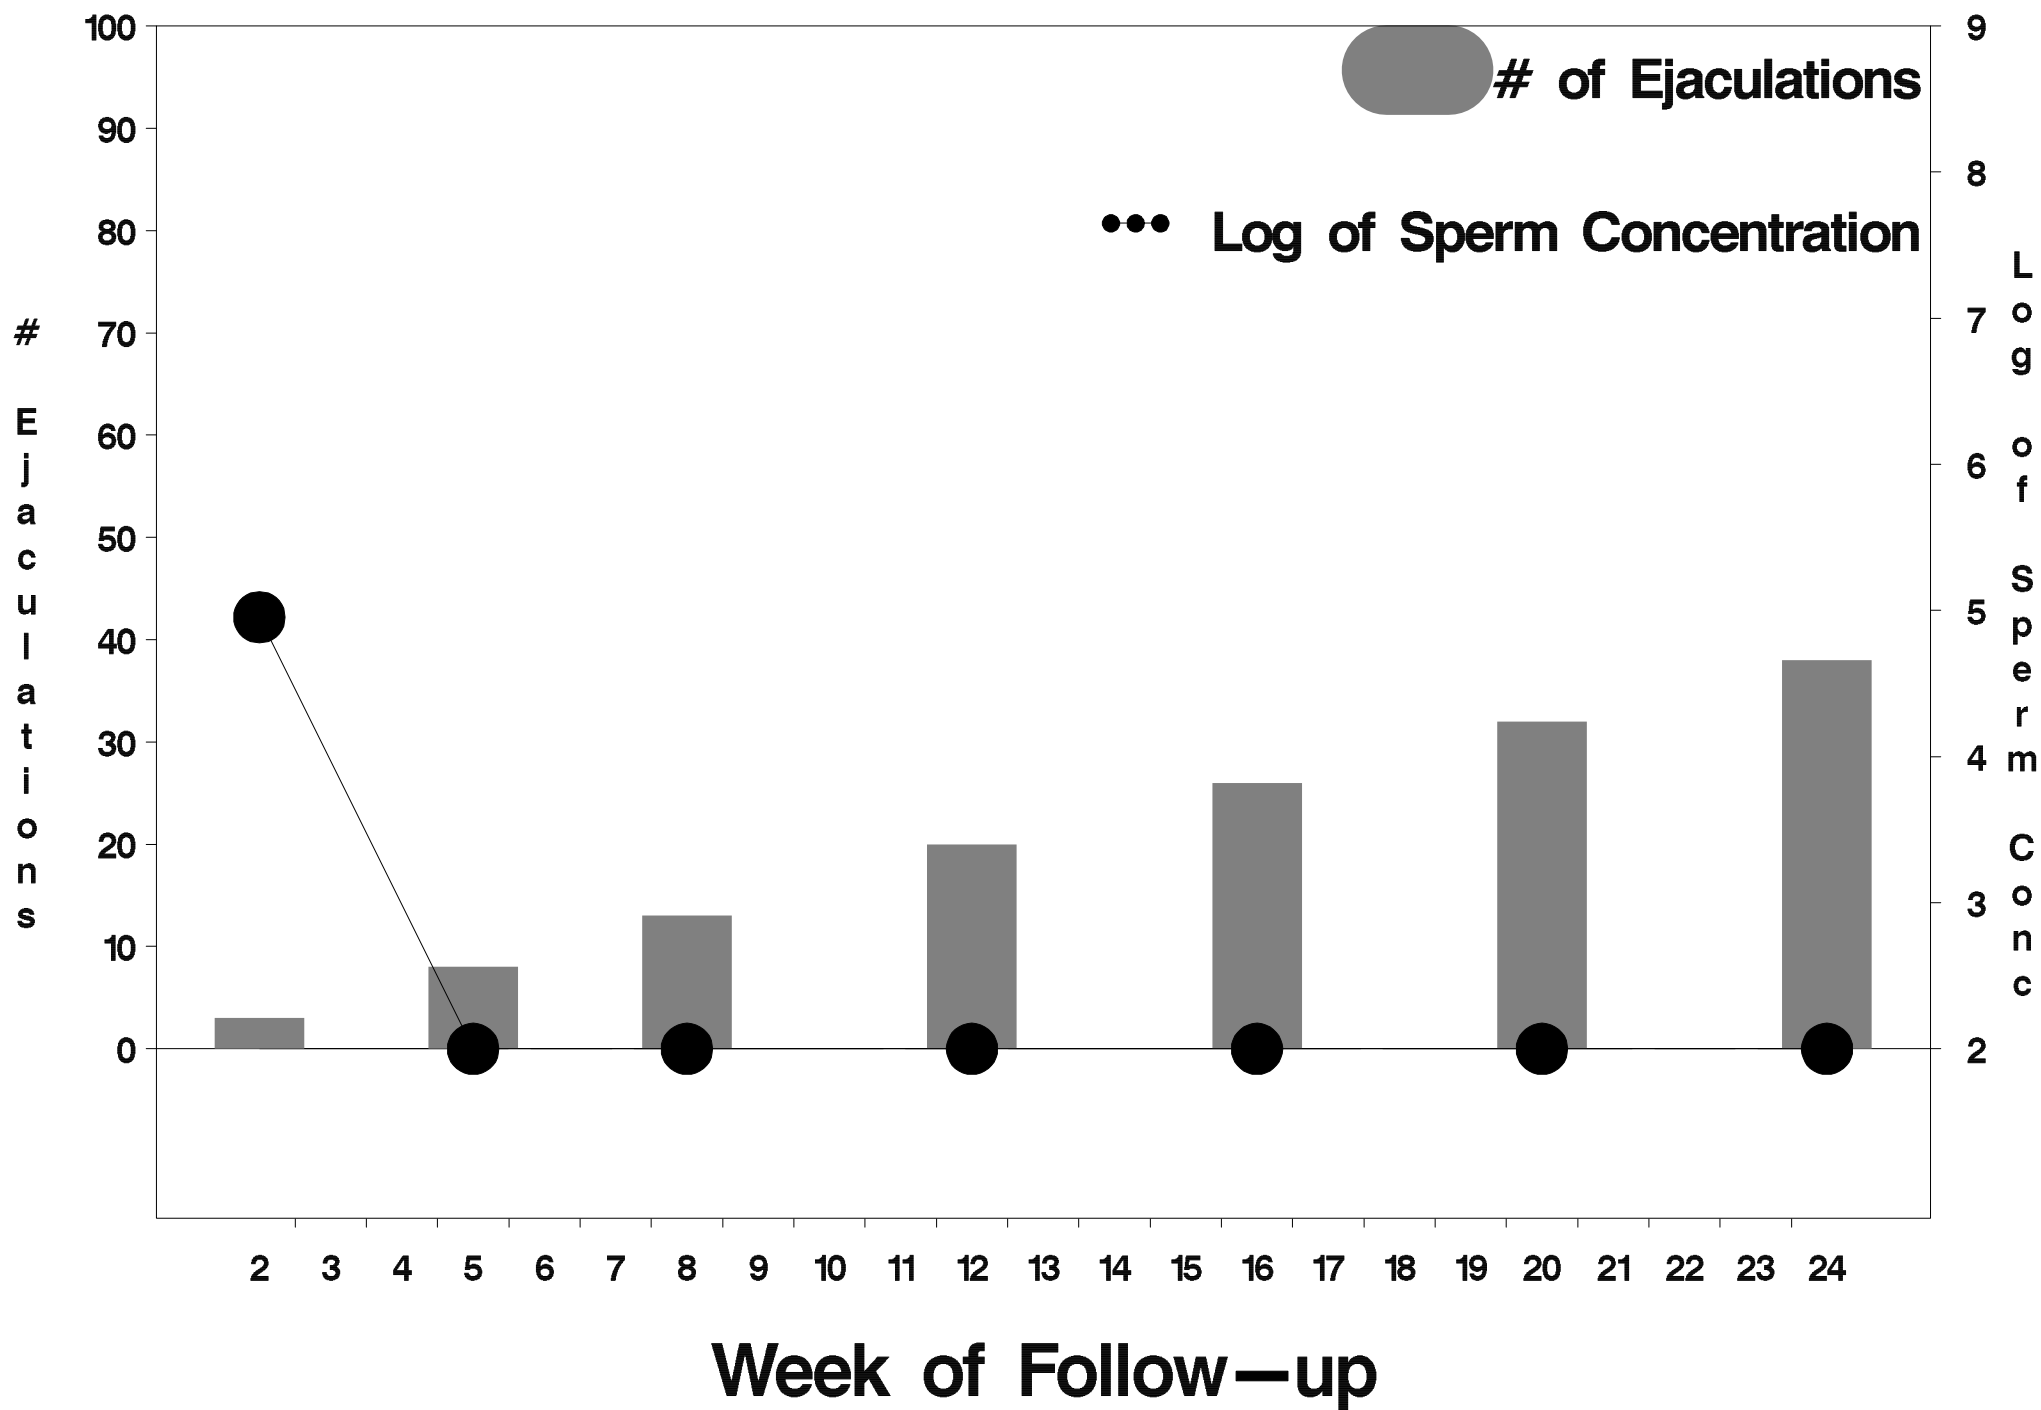

# Participant number= 305

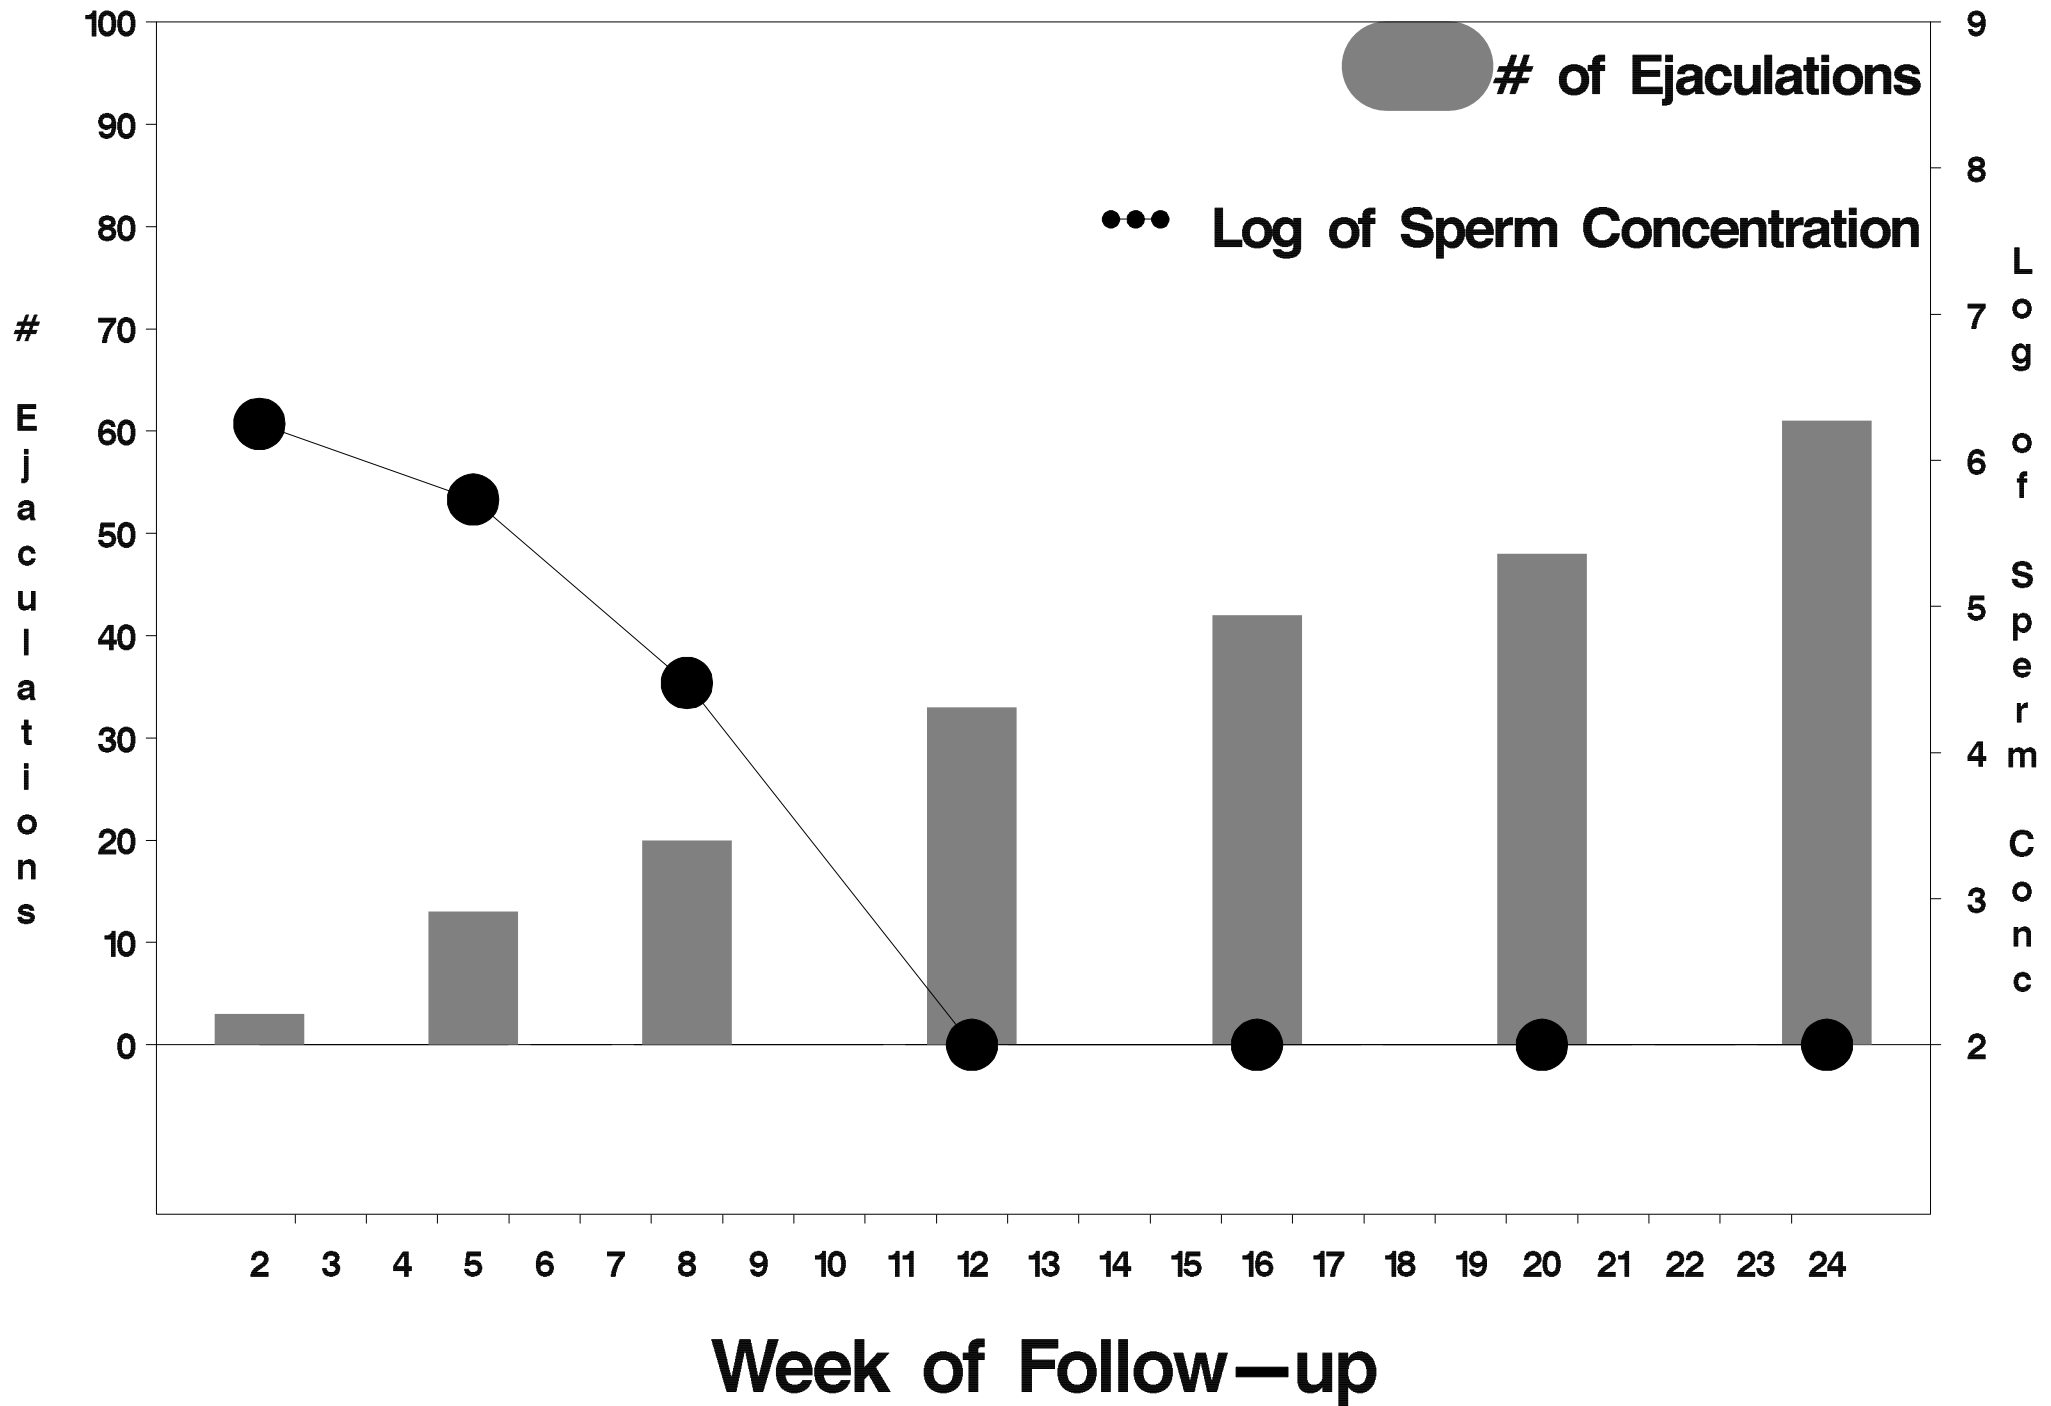



# Participant number= 306

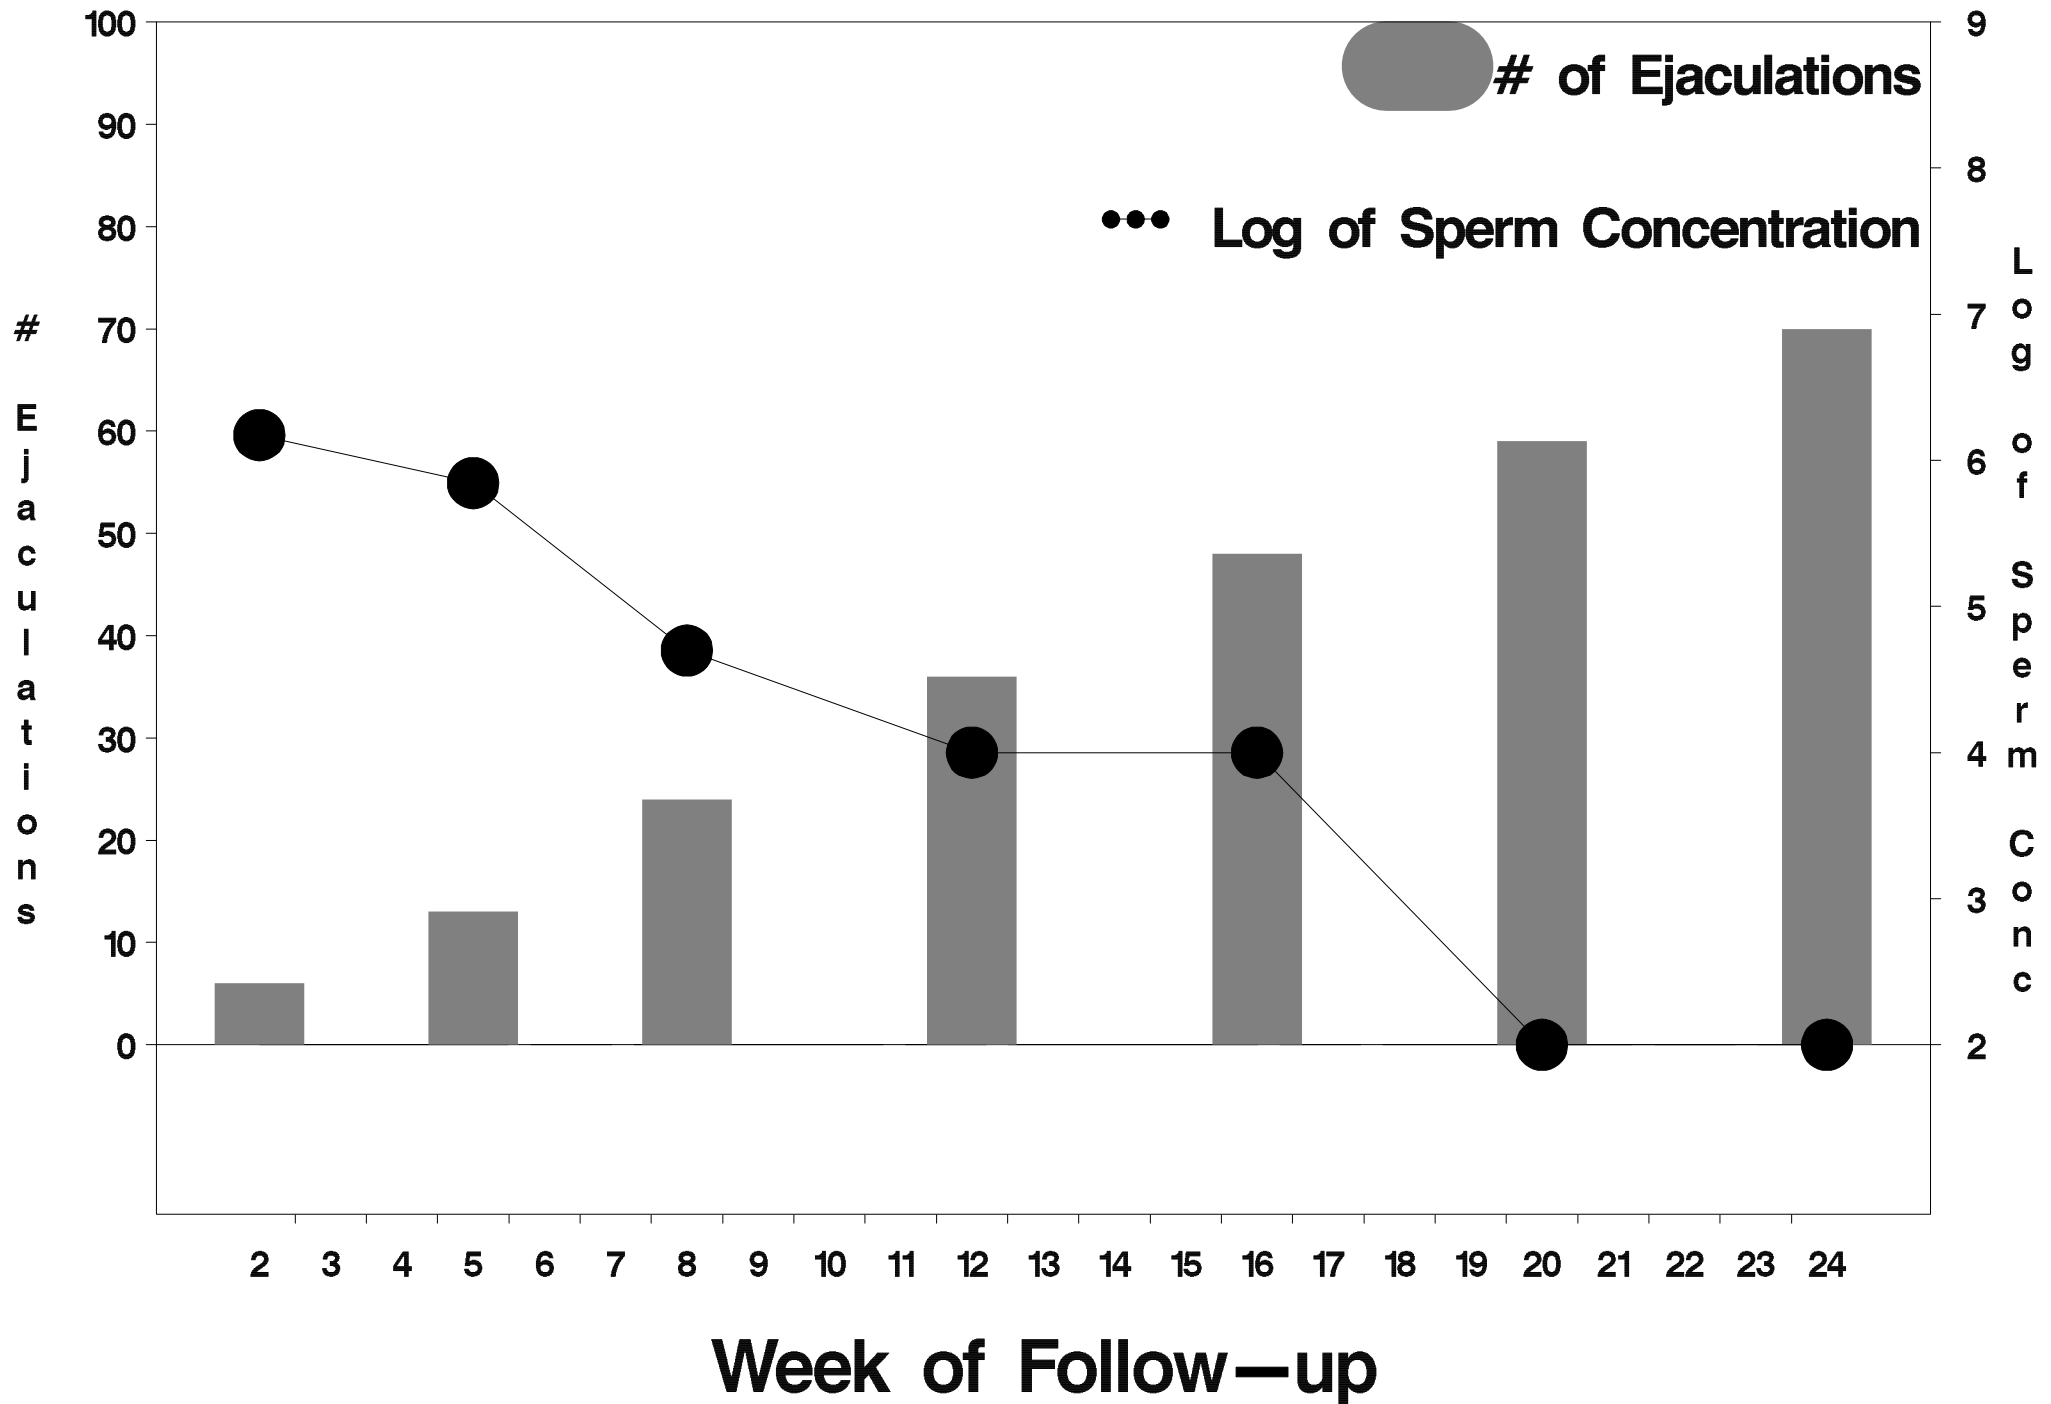

# Participant number= 307

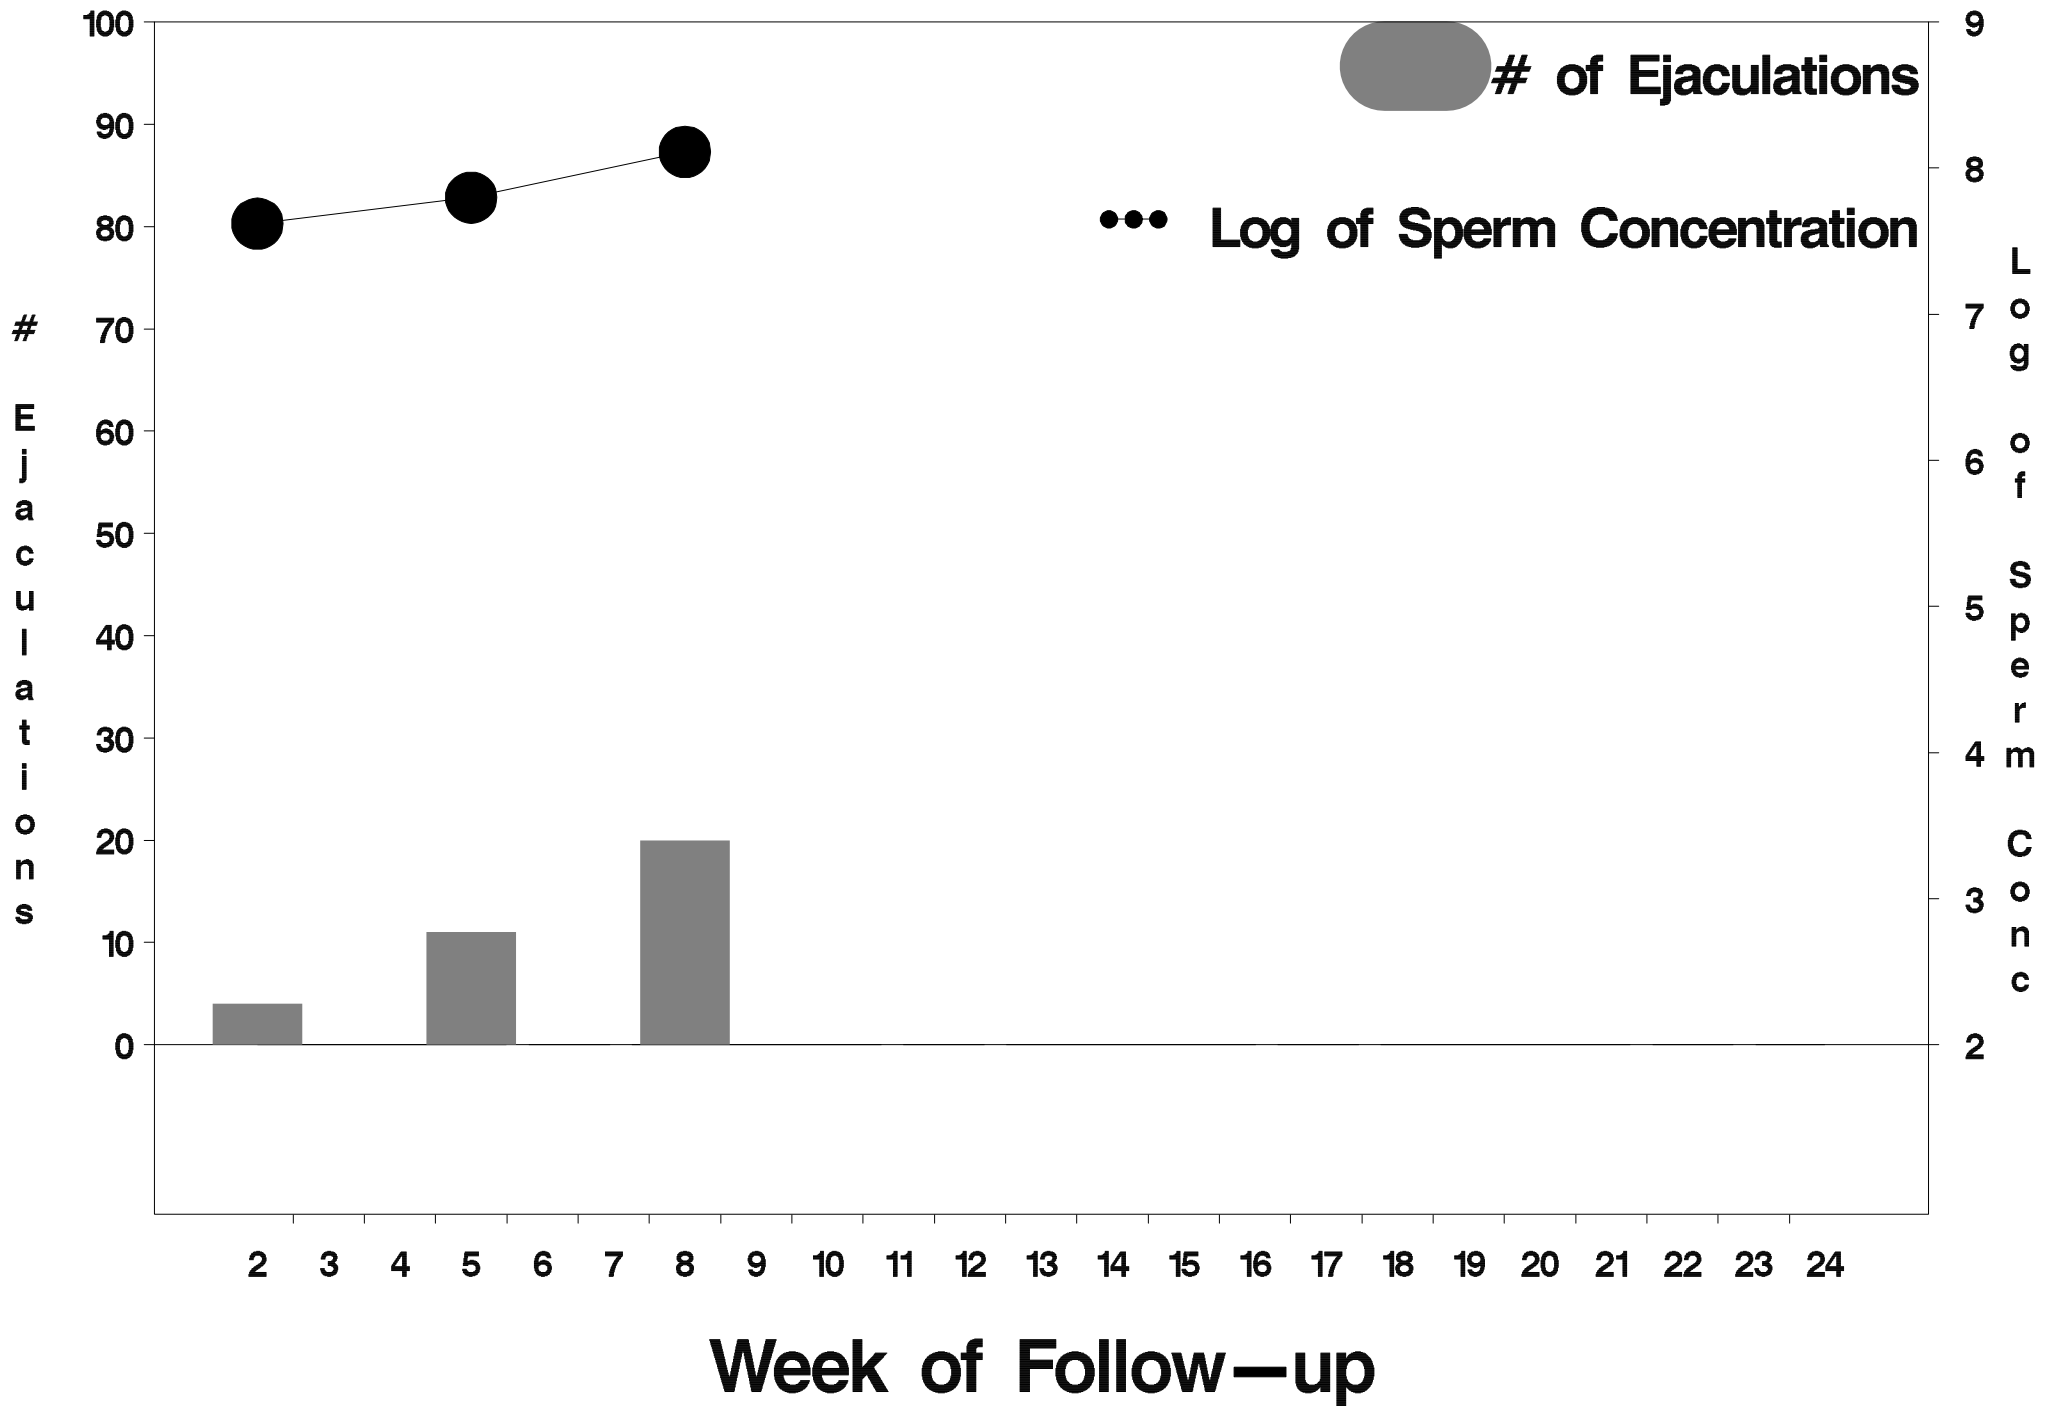

# Participant number= 308

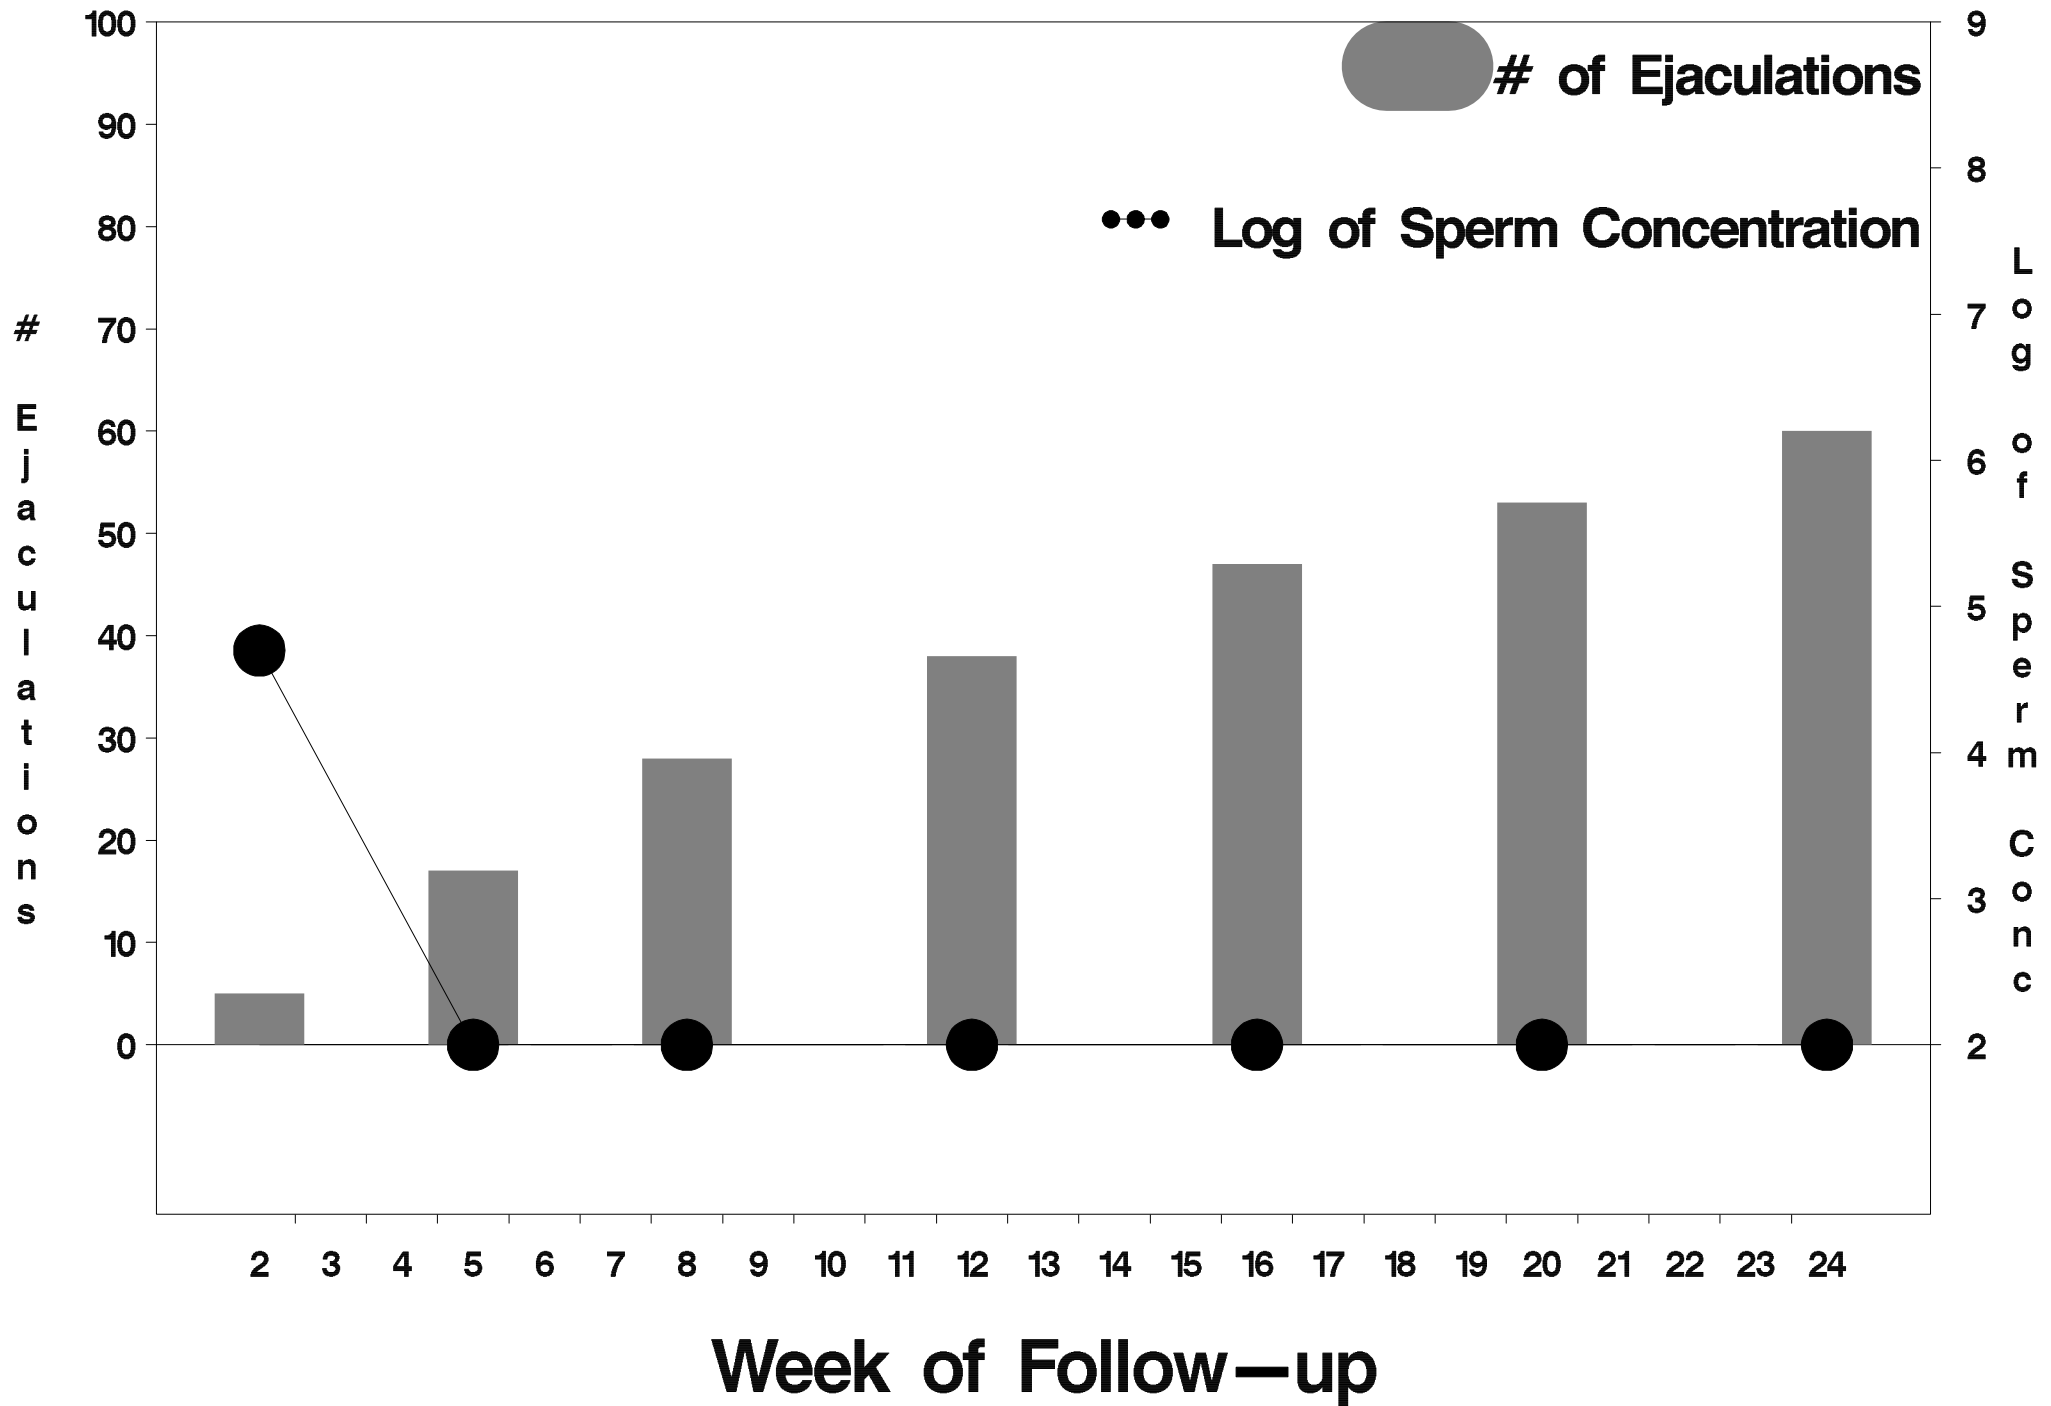

# Participant number= 309

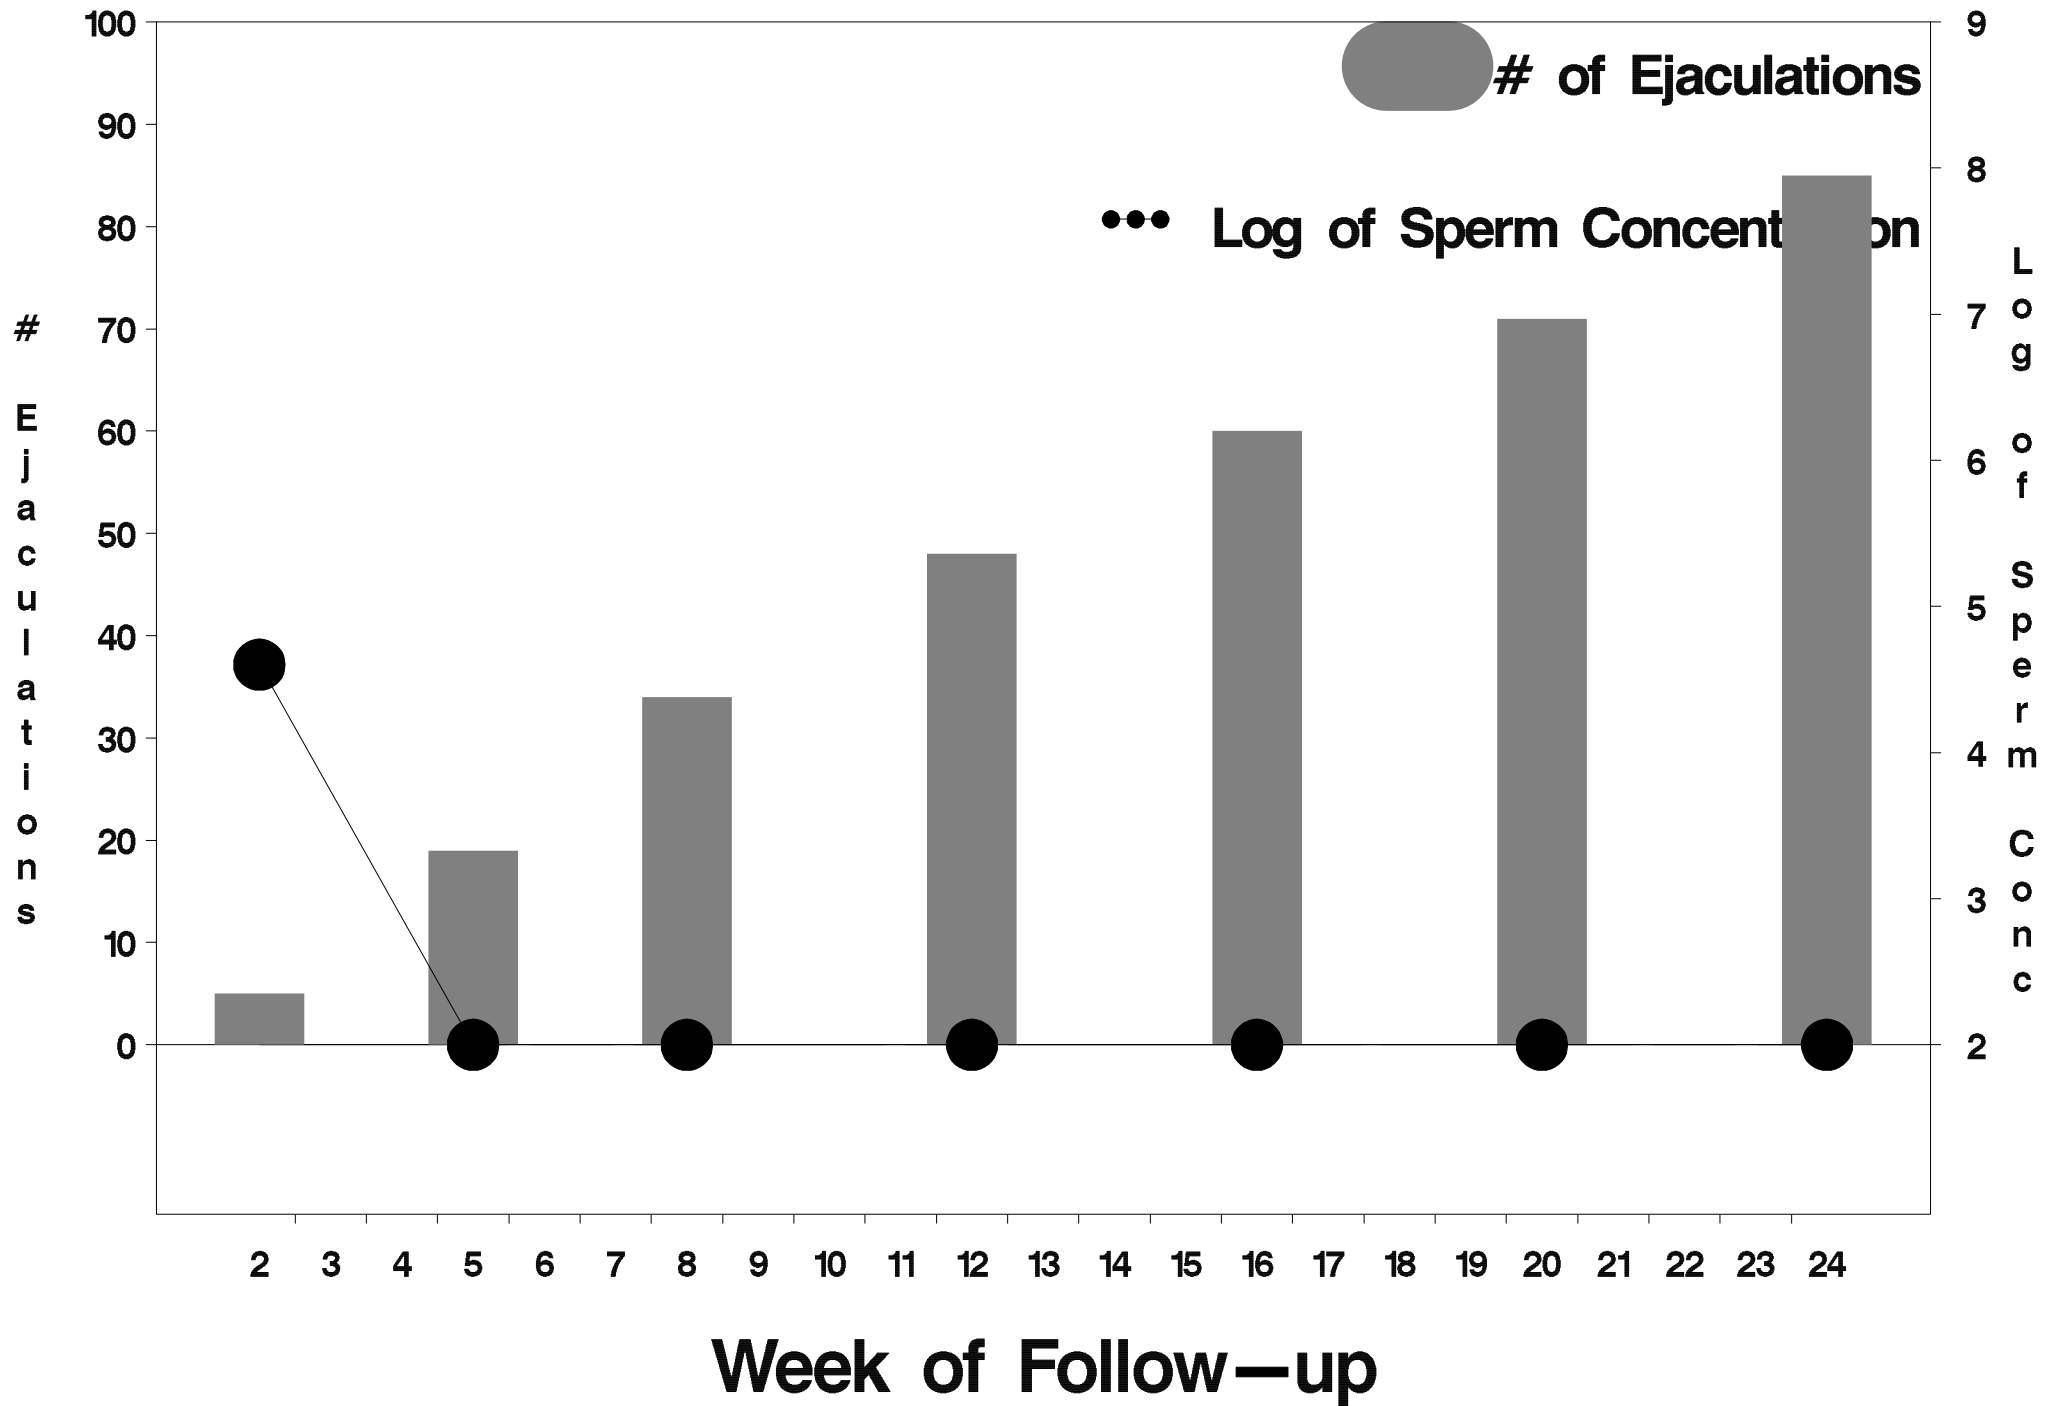

# Participant number= 310

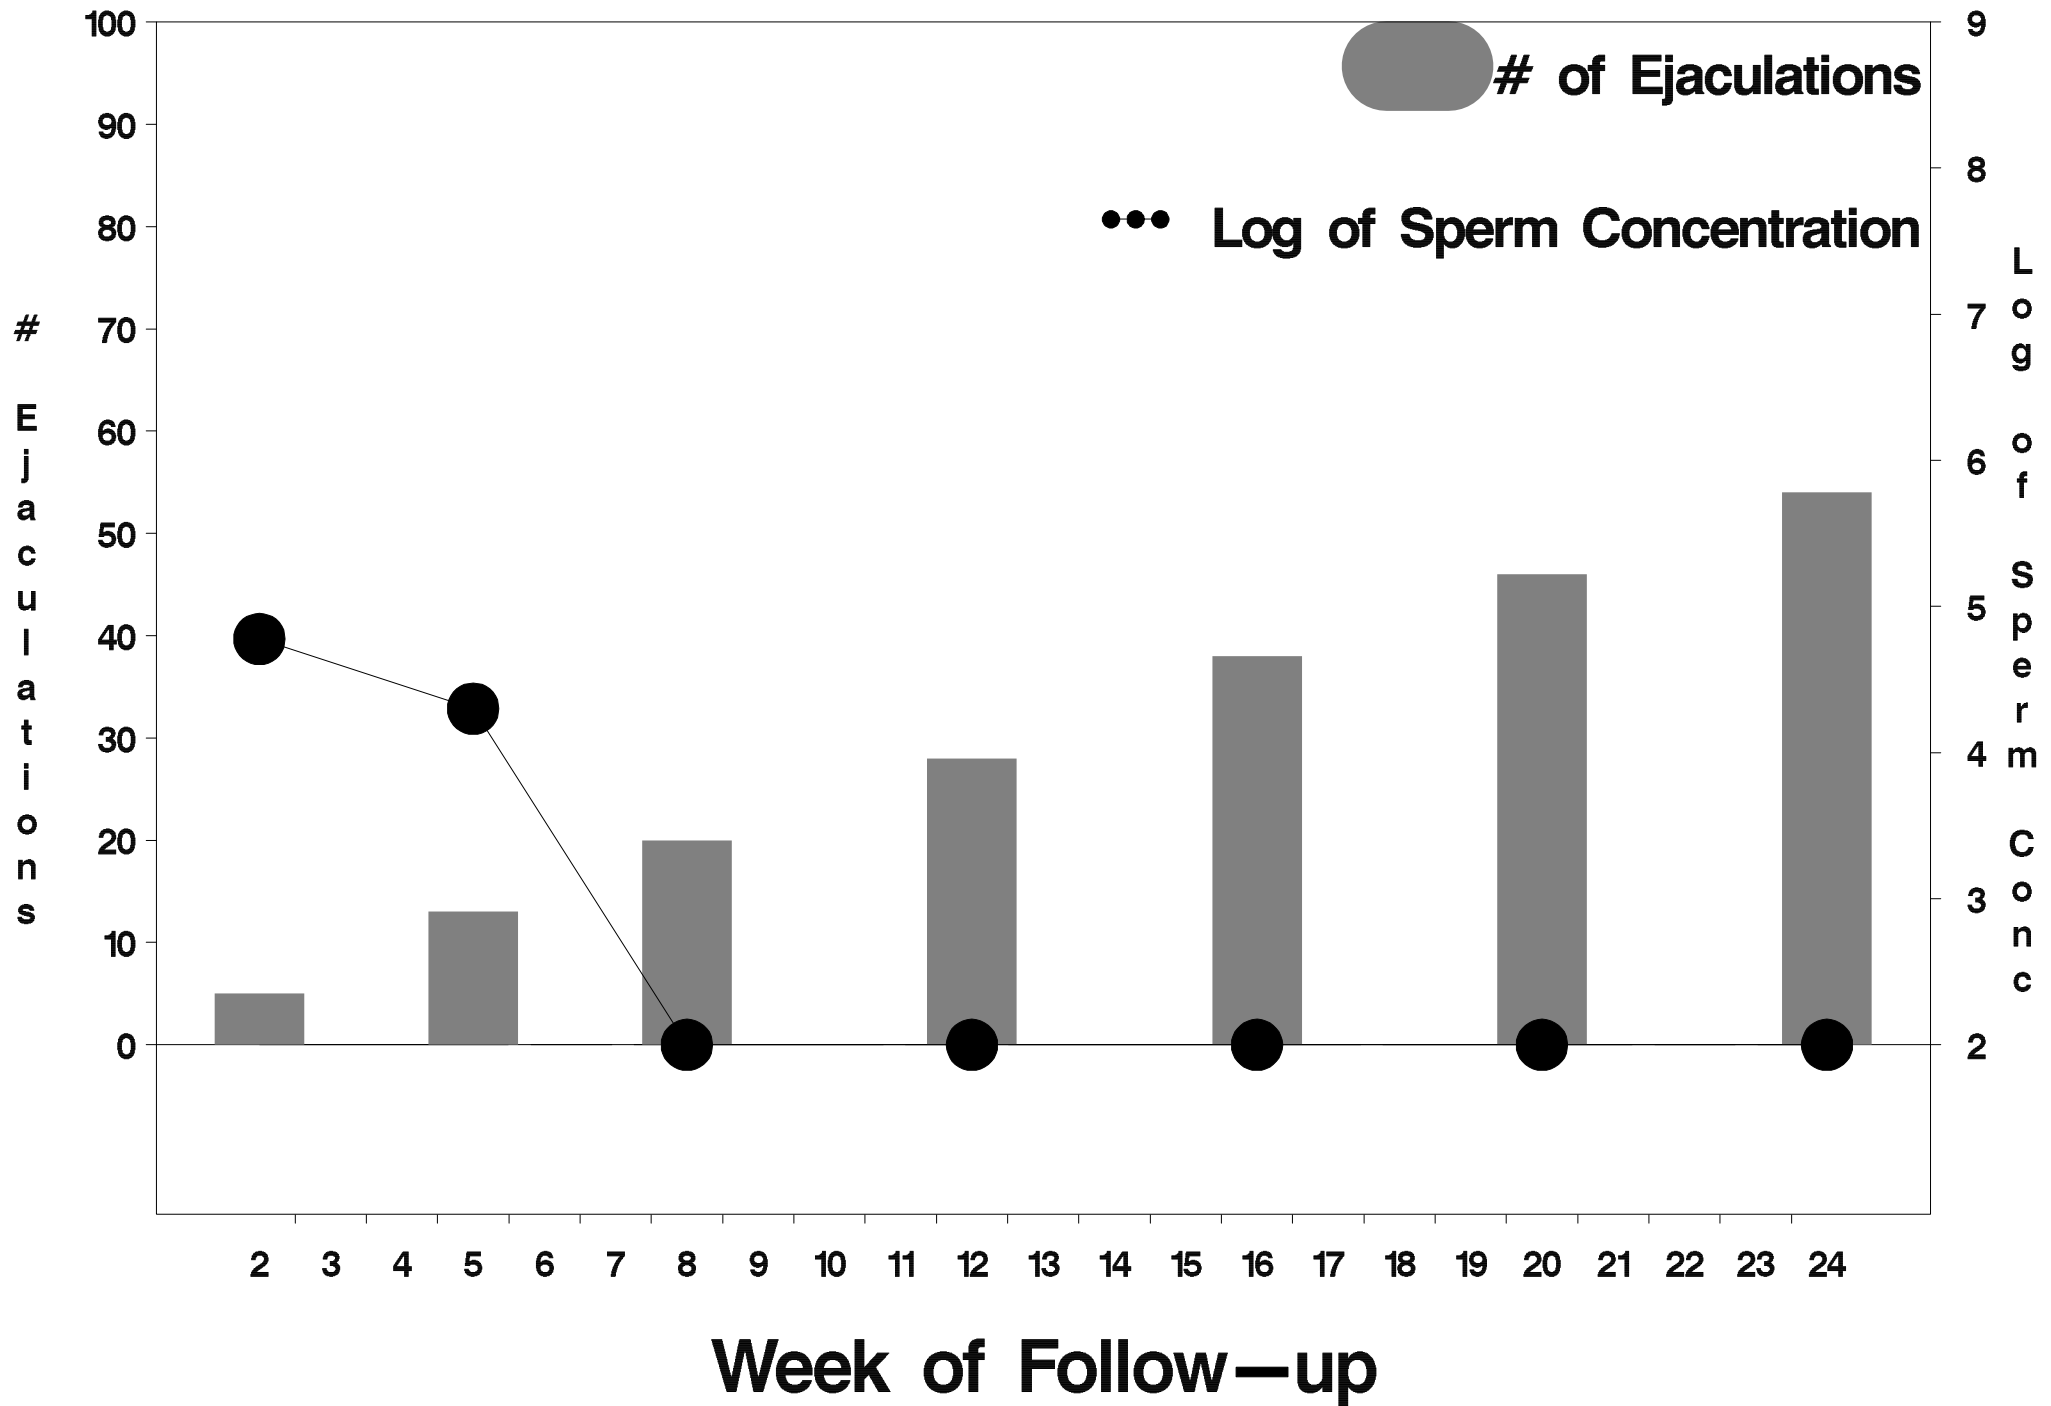

# Participant number= 311

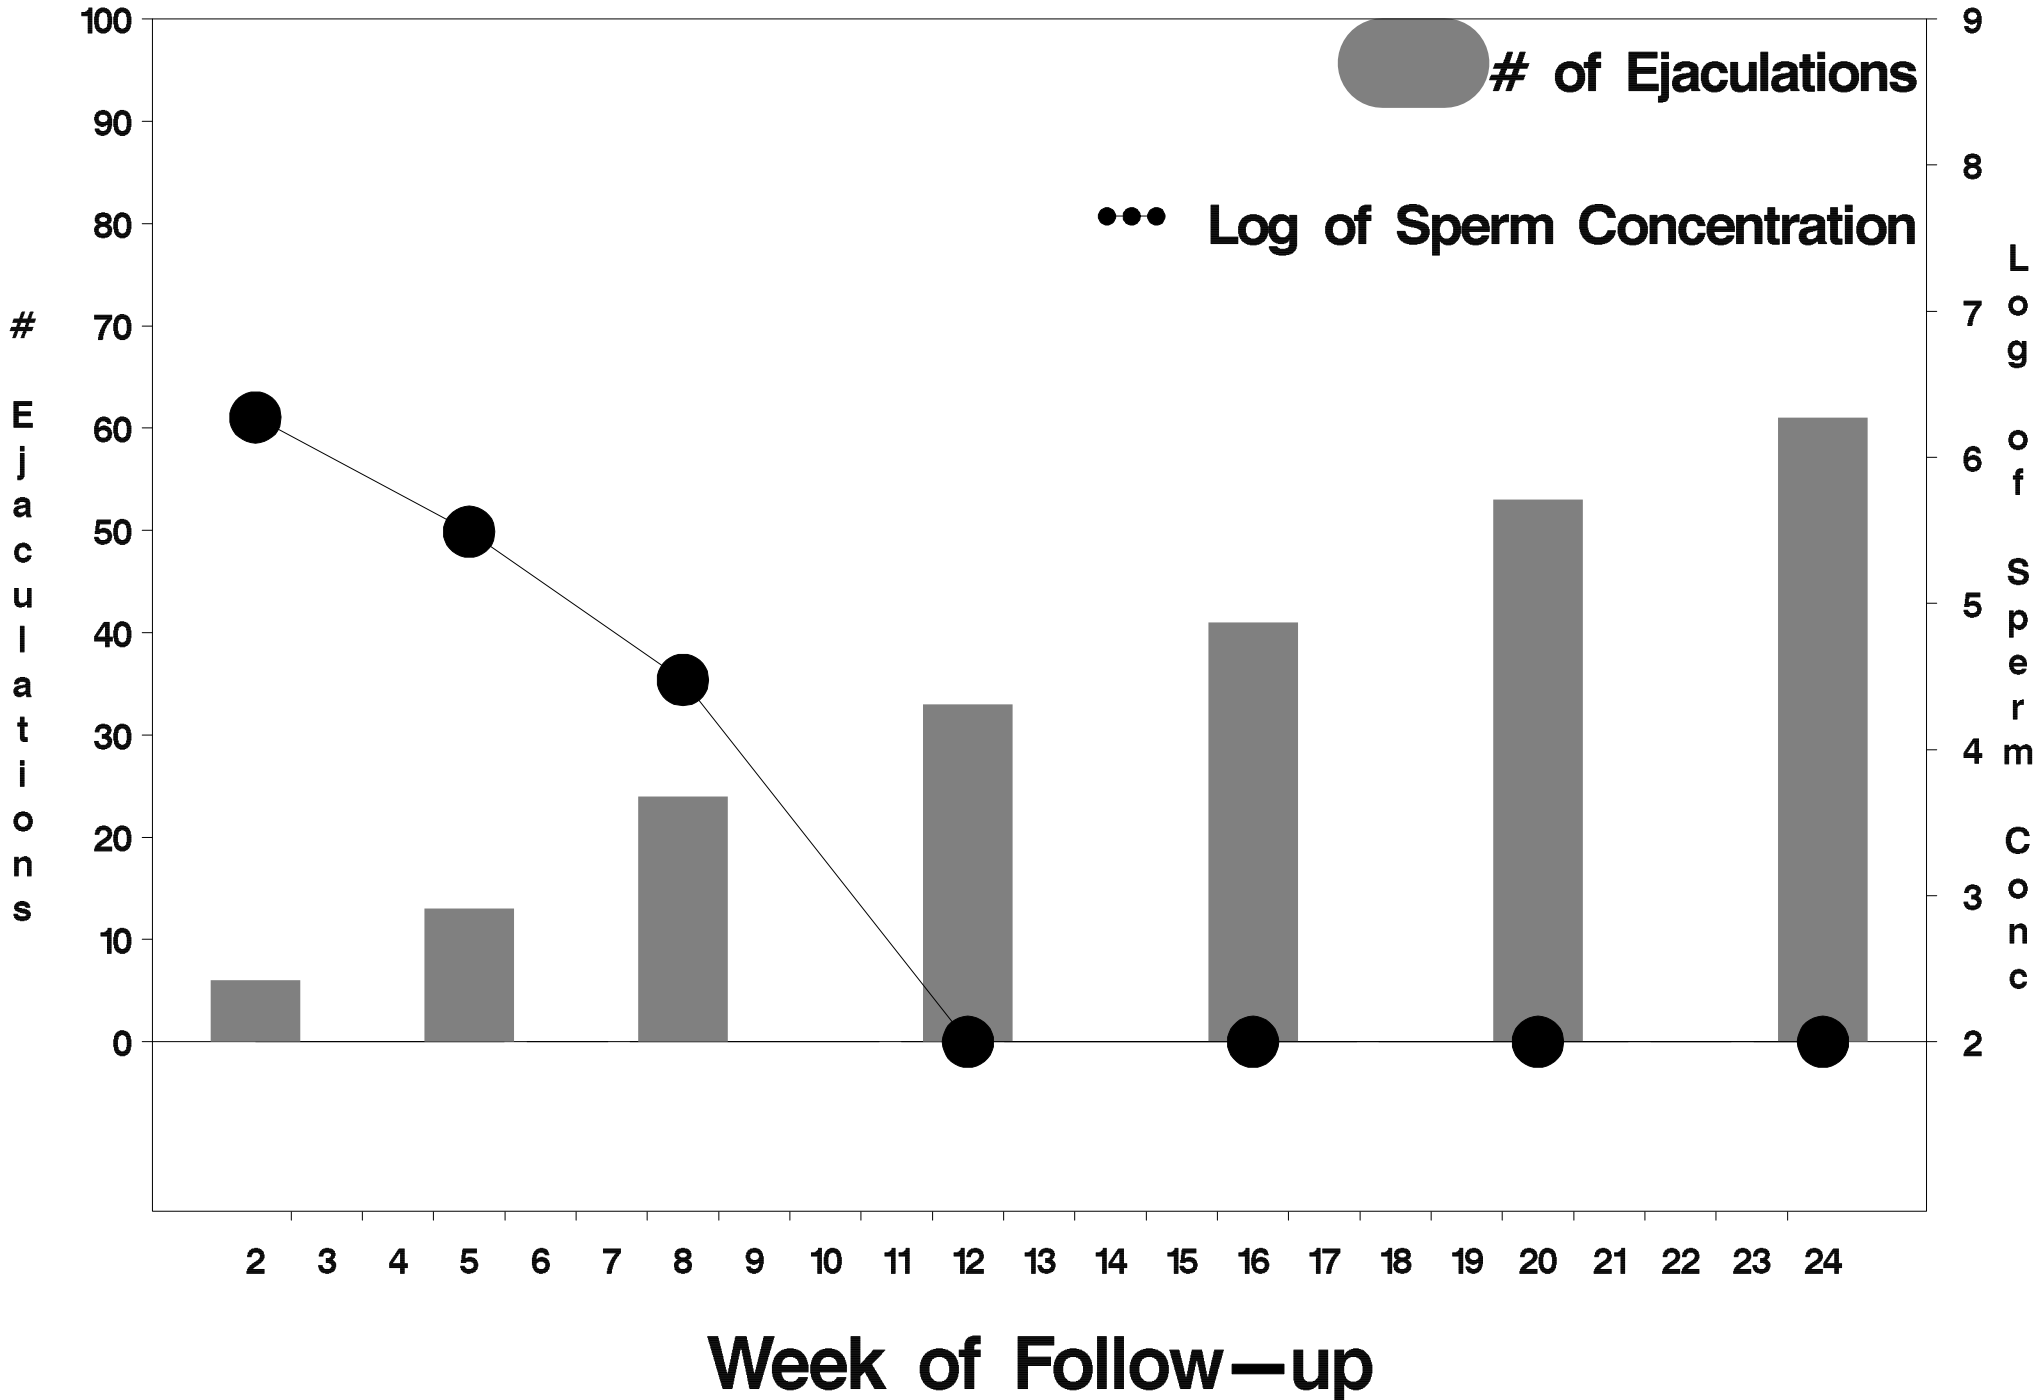

# Participant number= 312

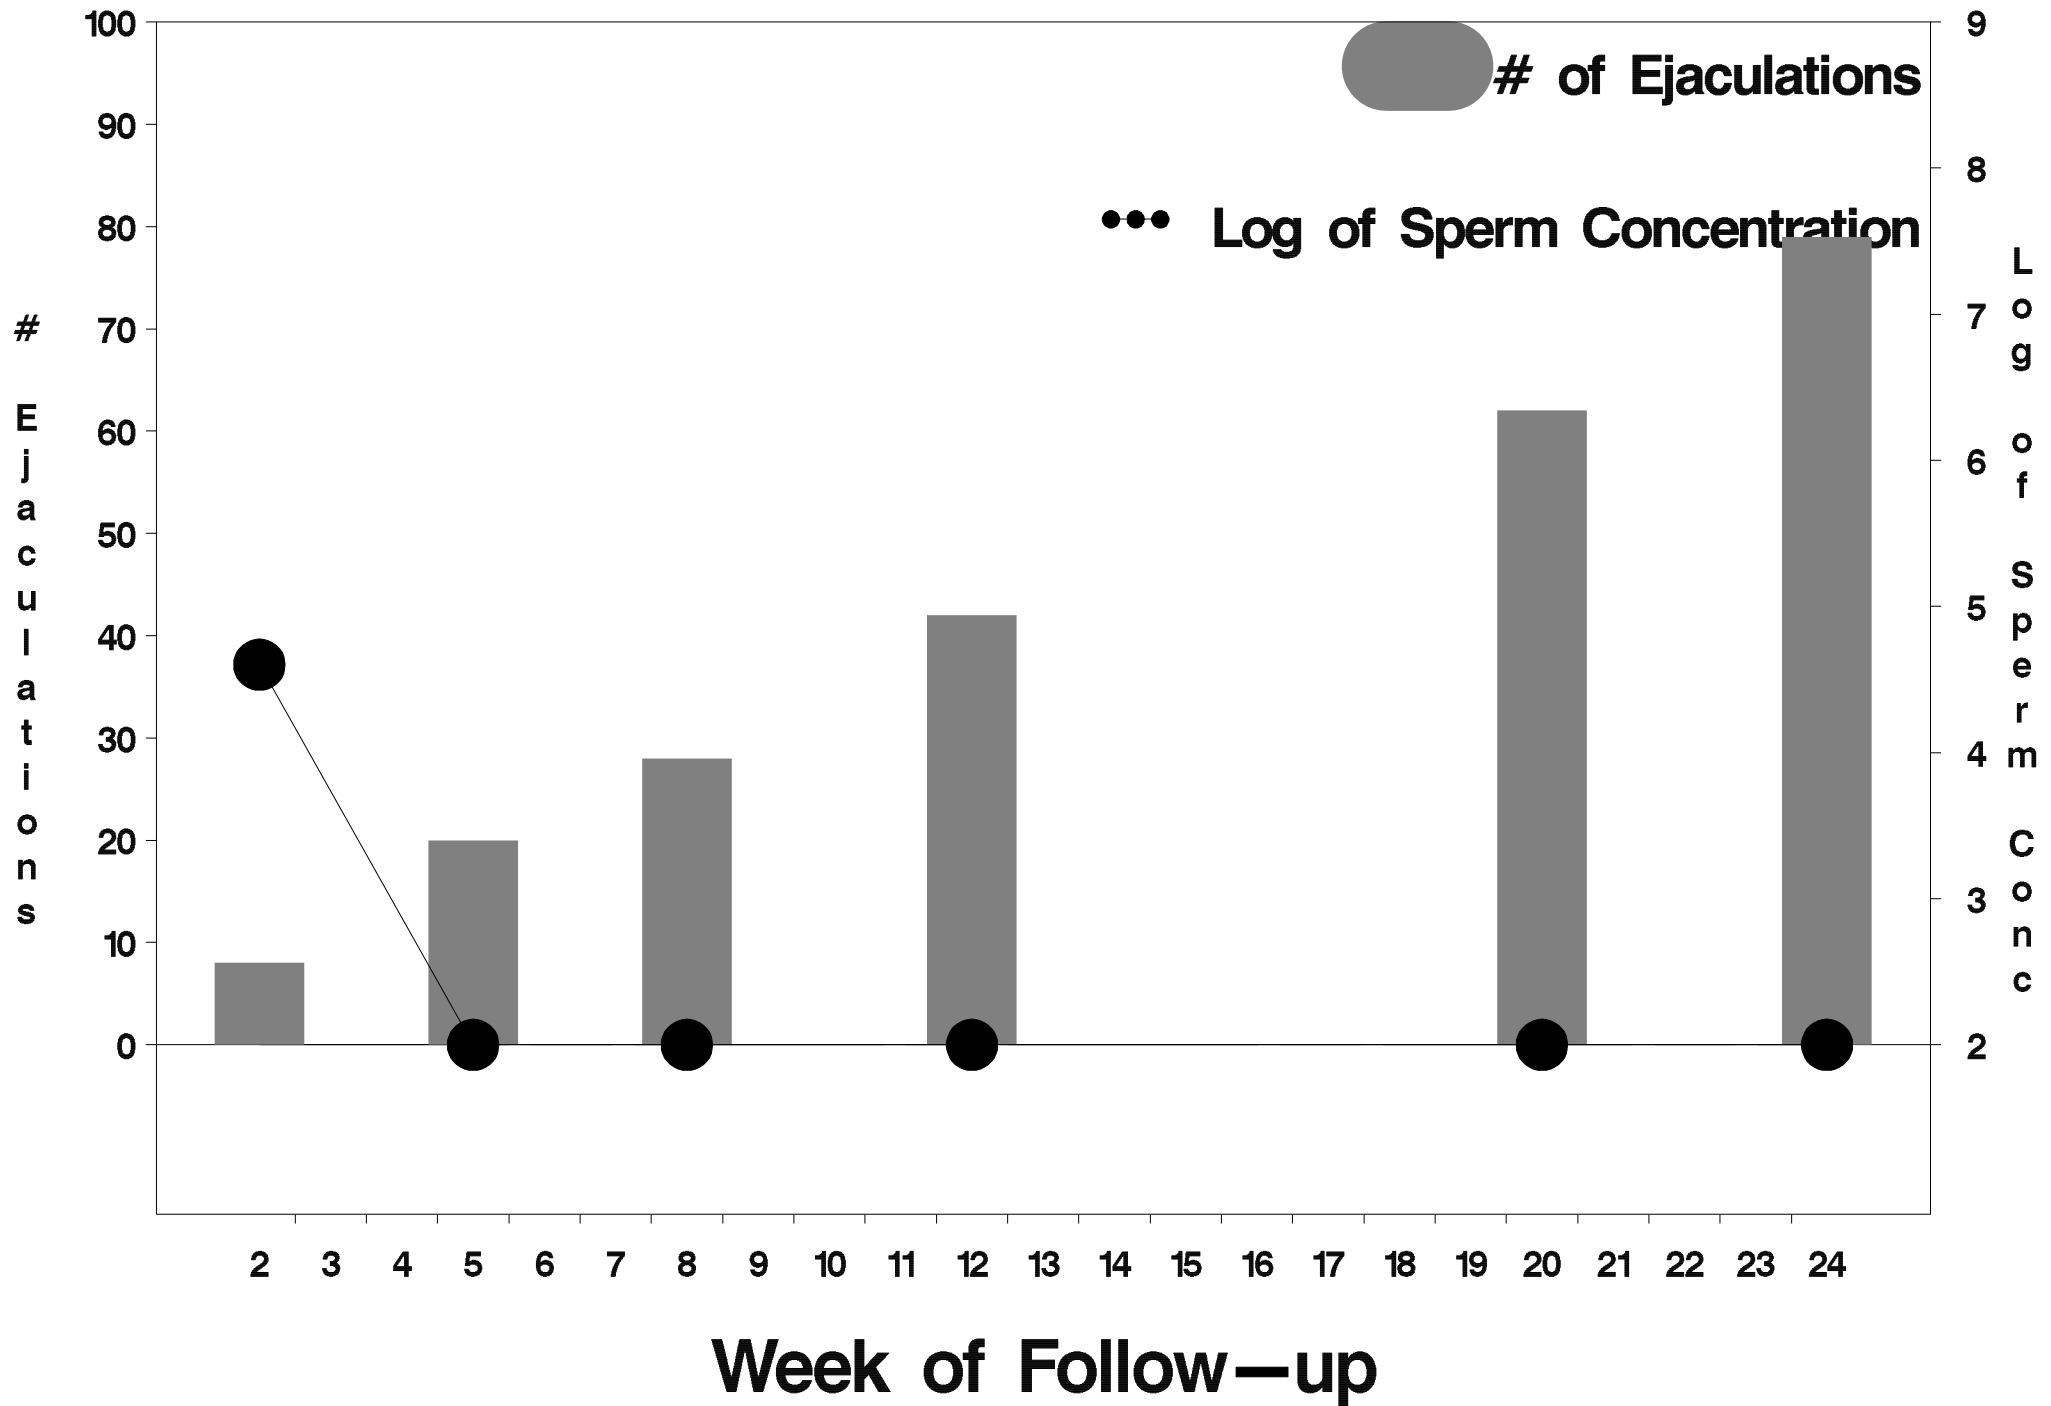

# Participant number= 313

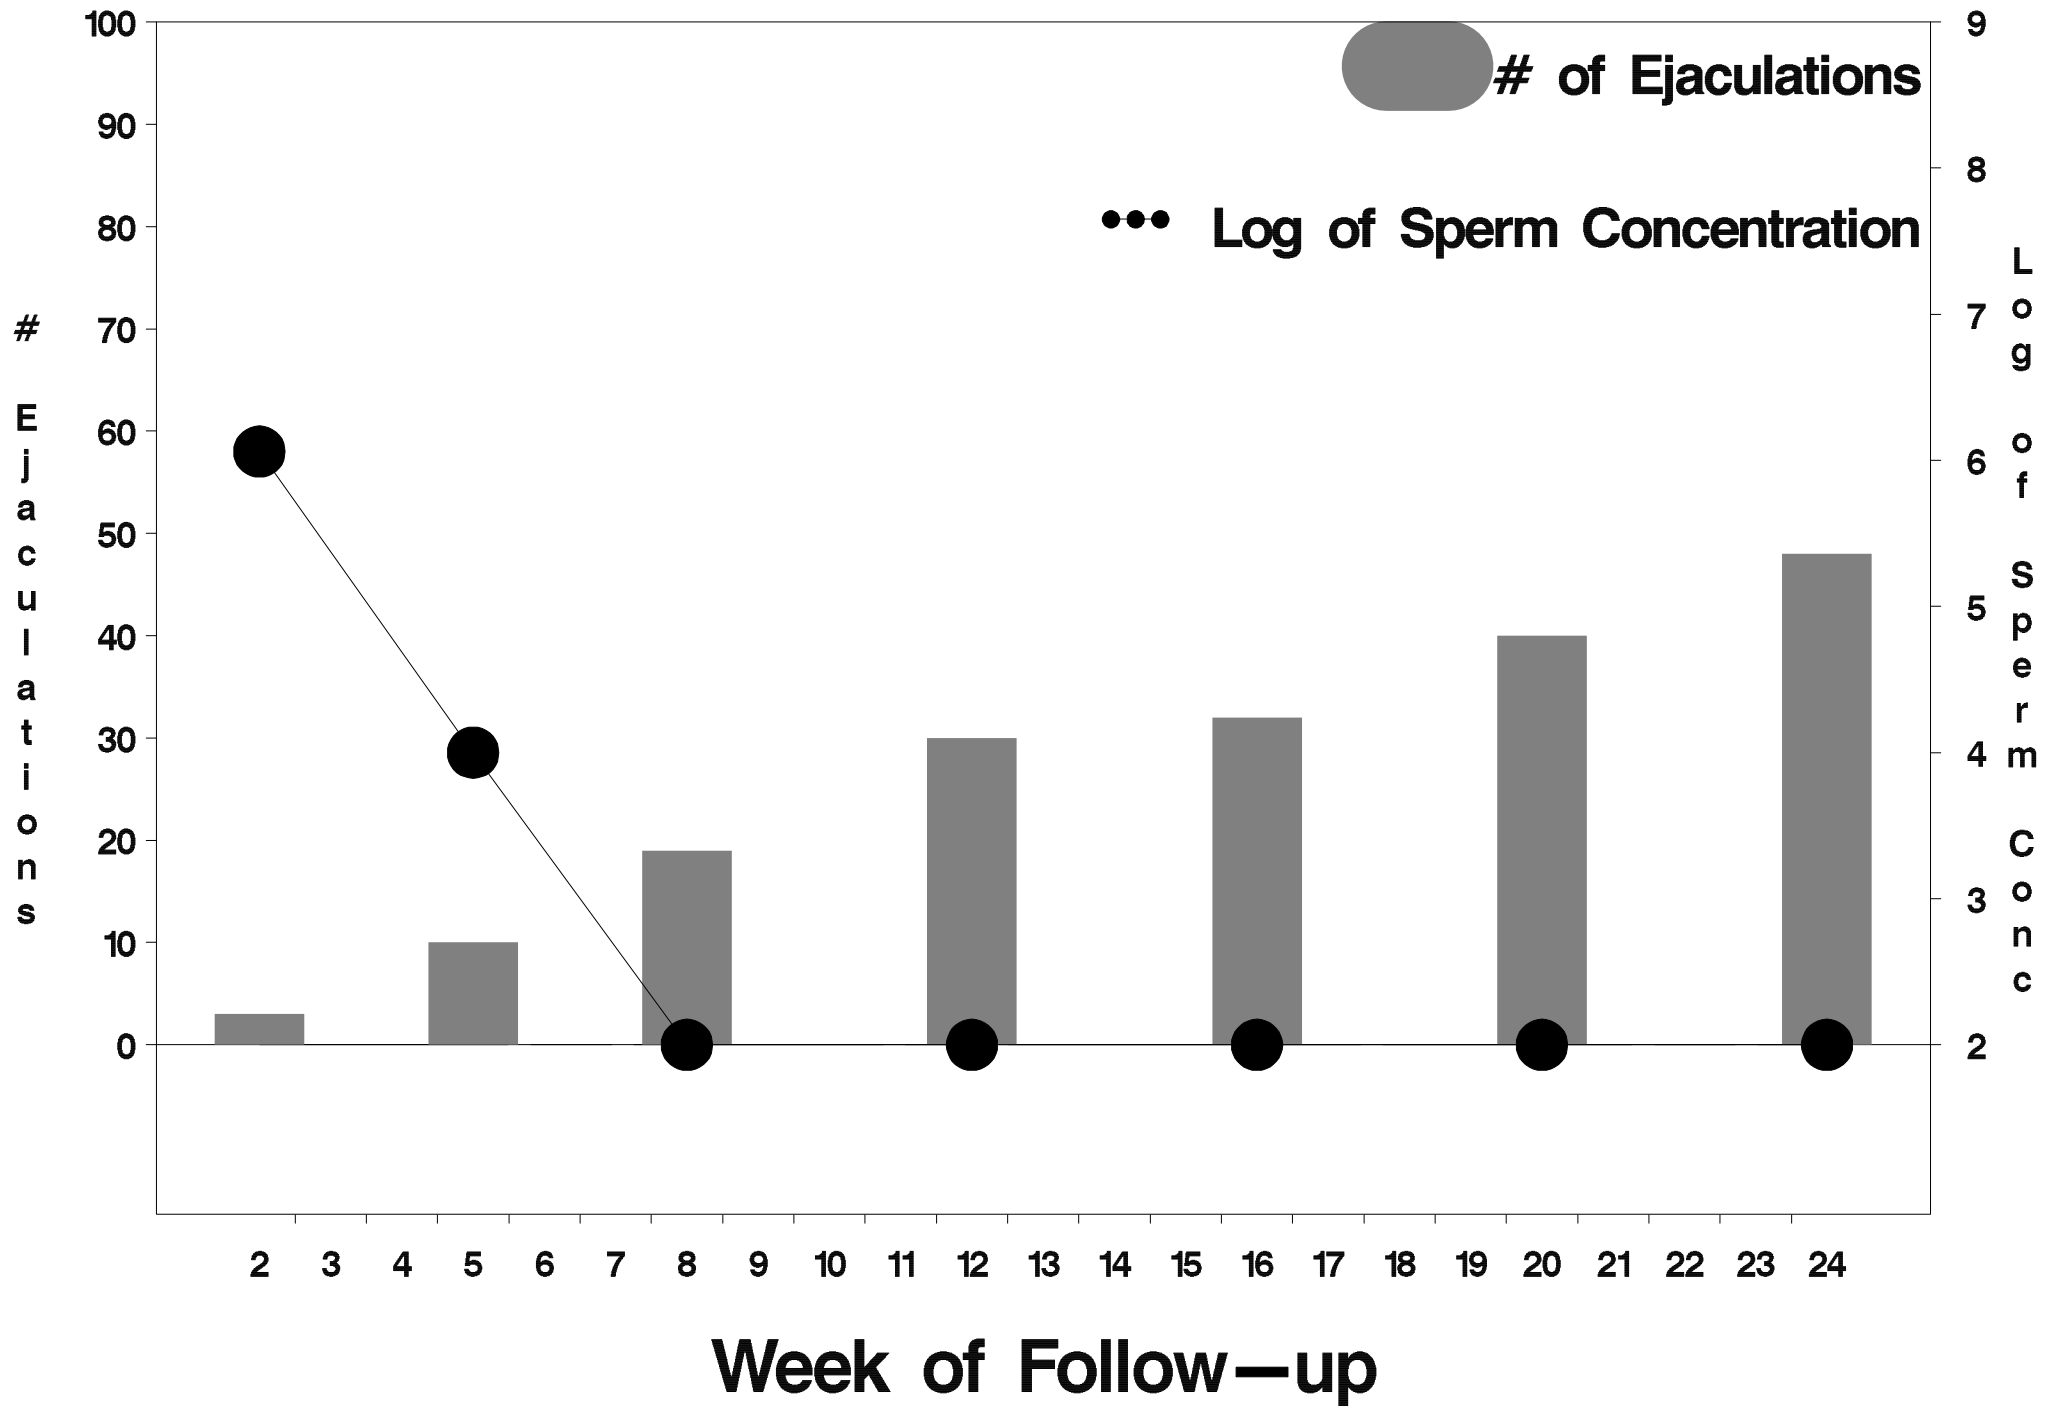



# Participant number= 314

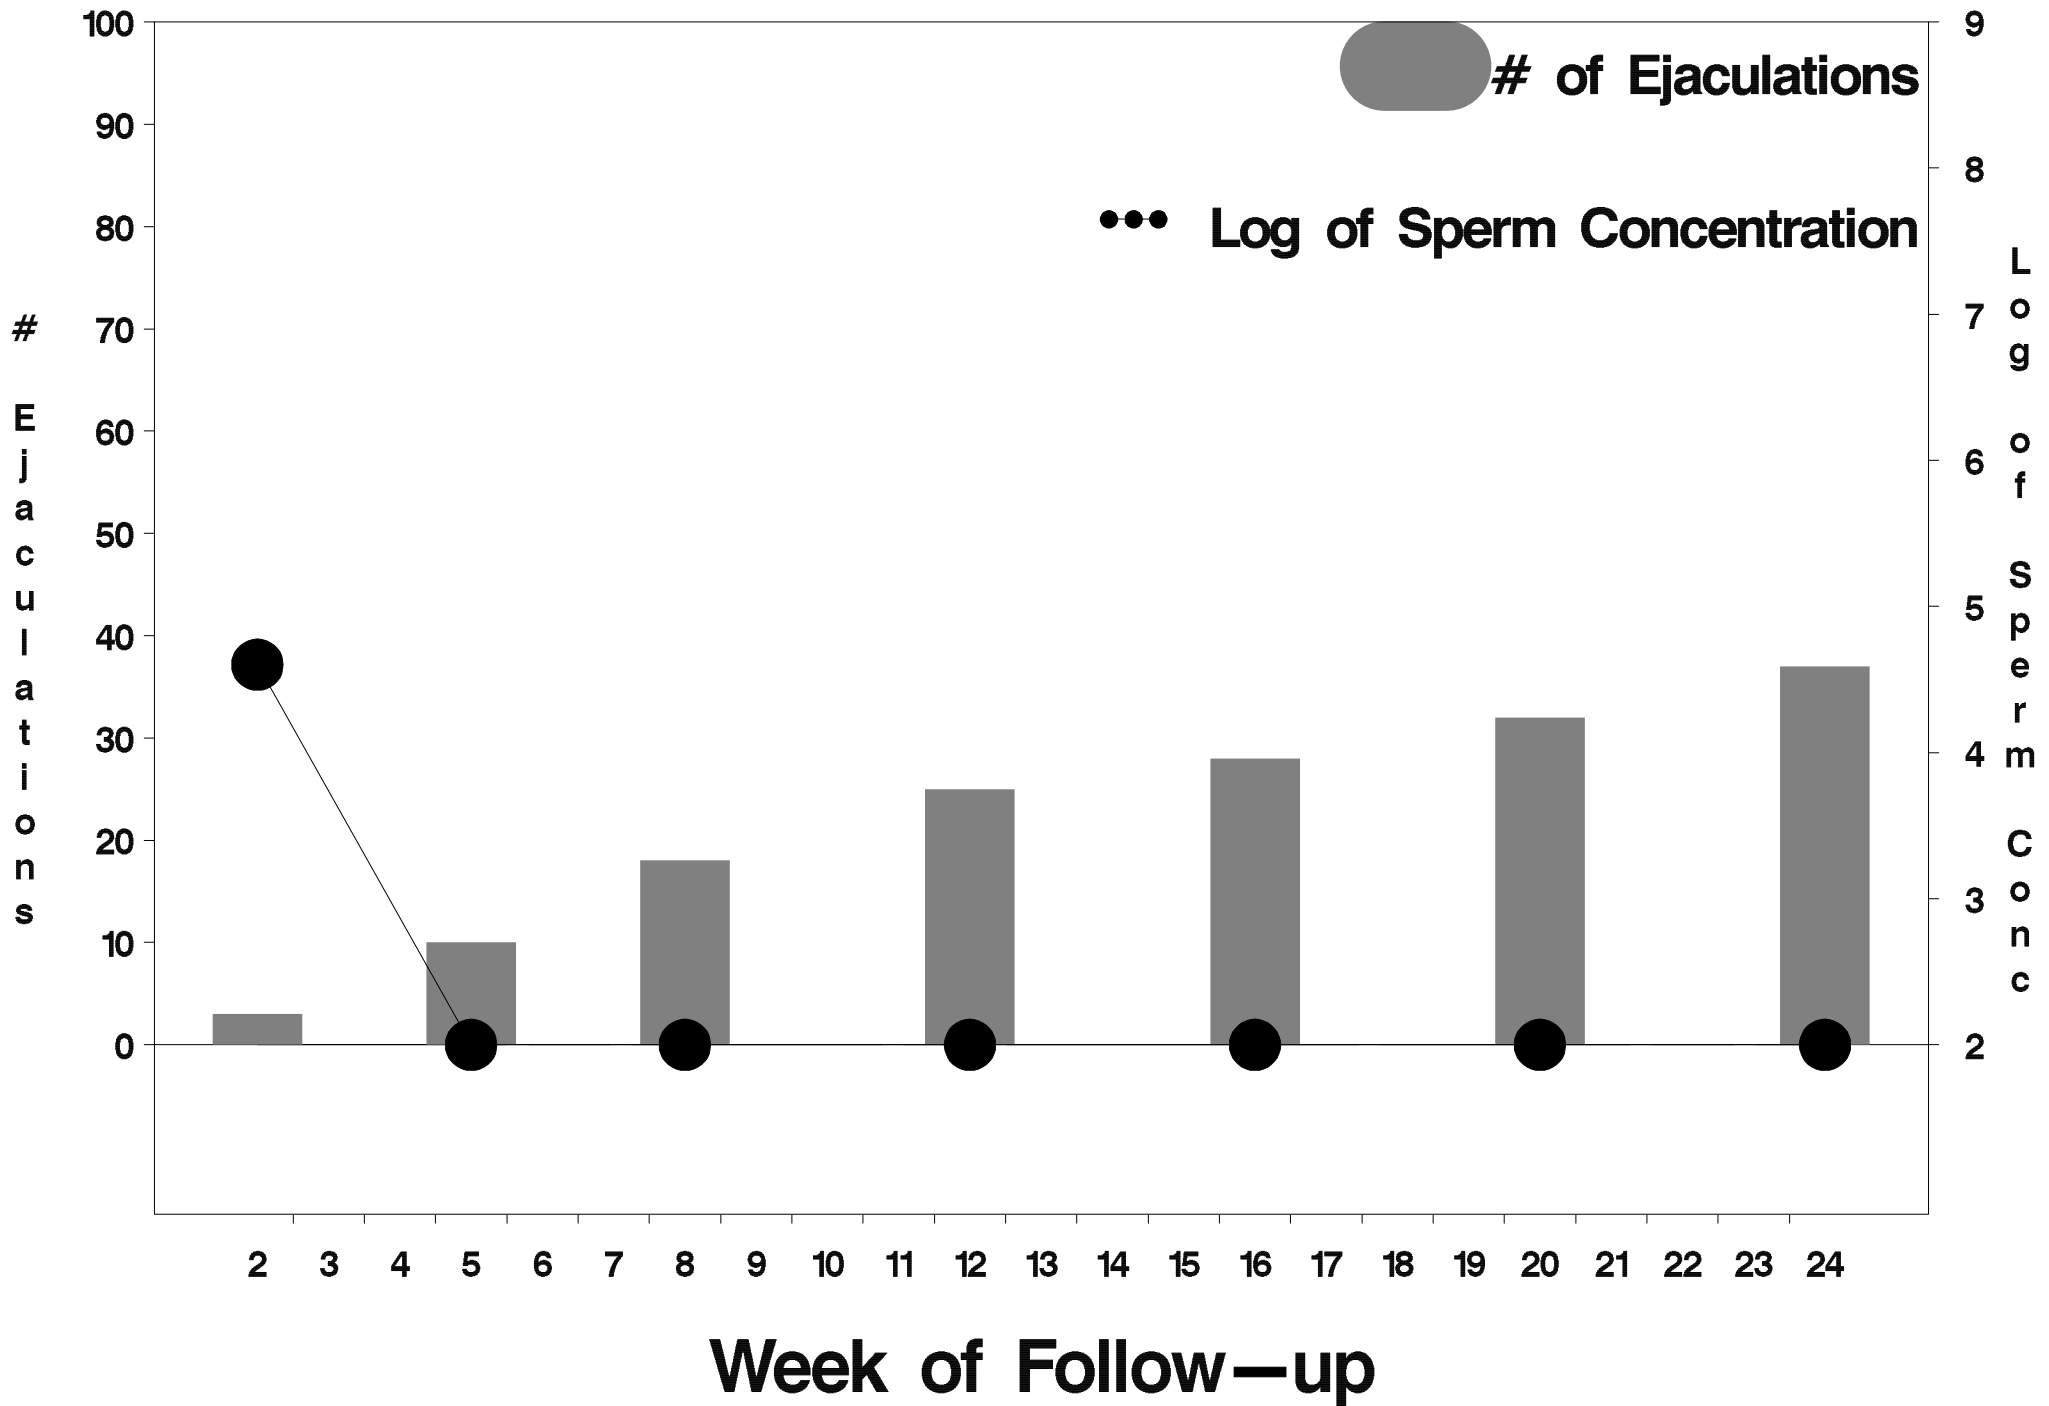

# Participant number= 315

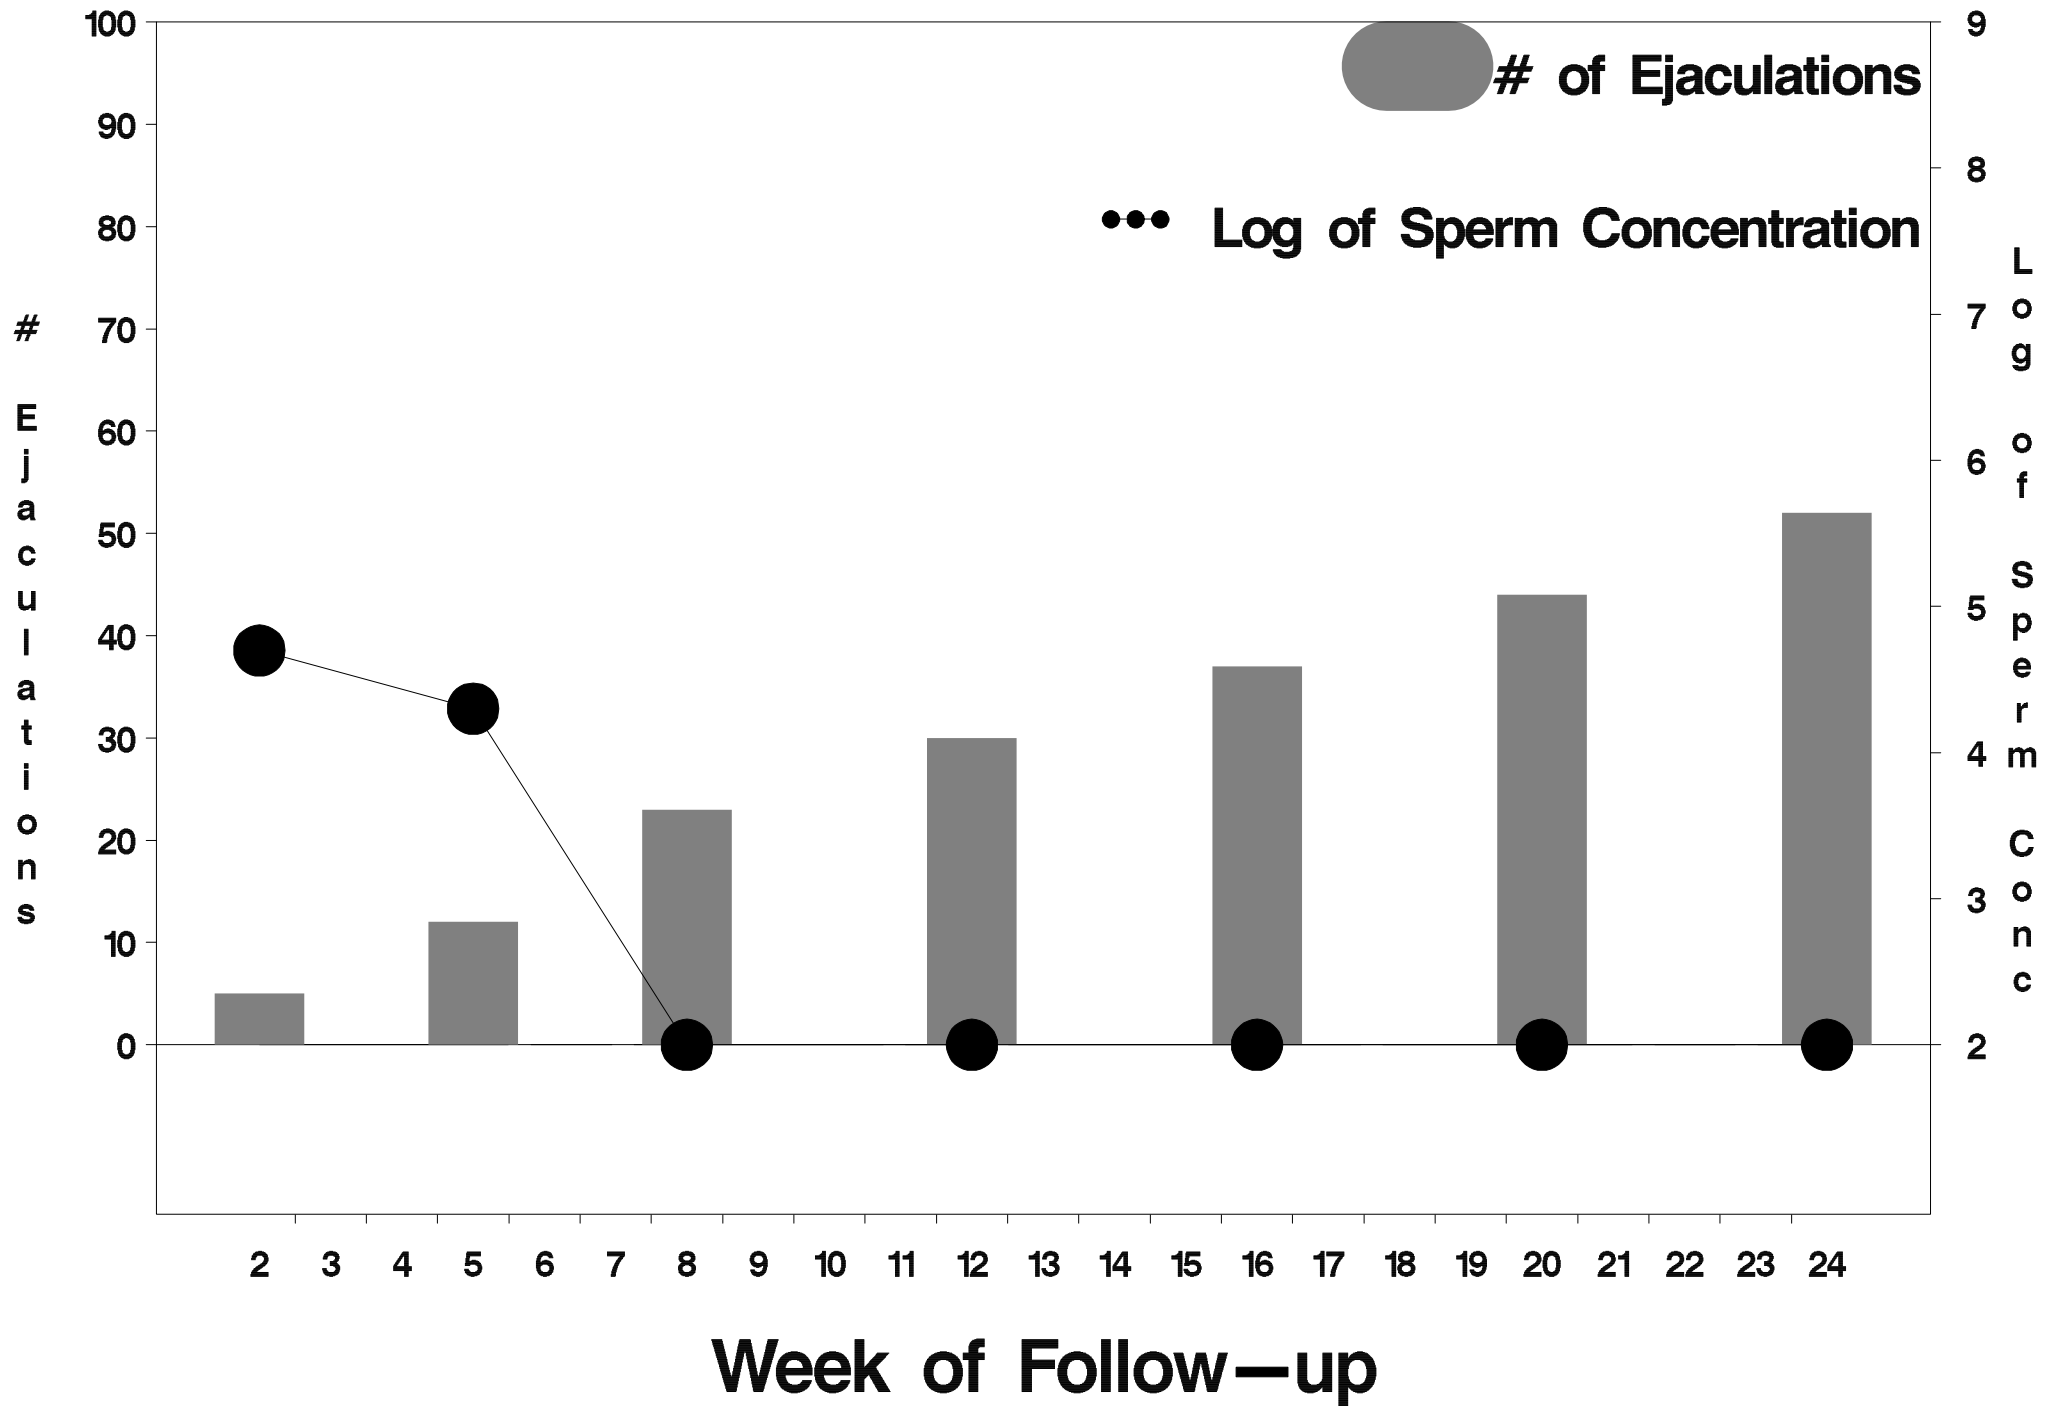

# Participant number= 316

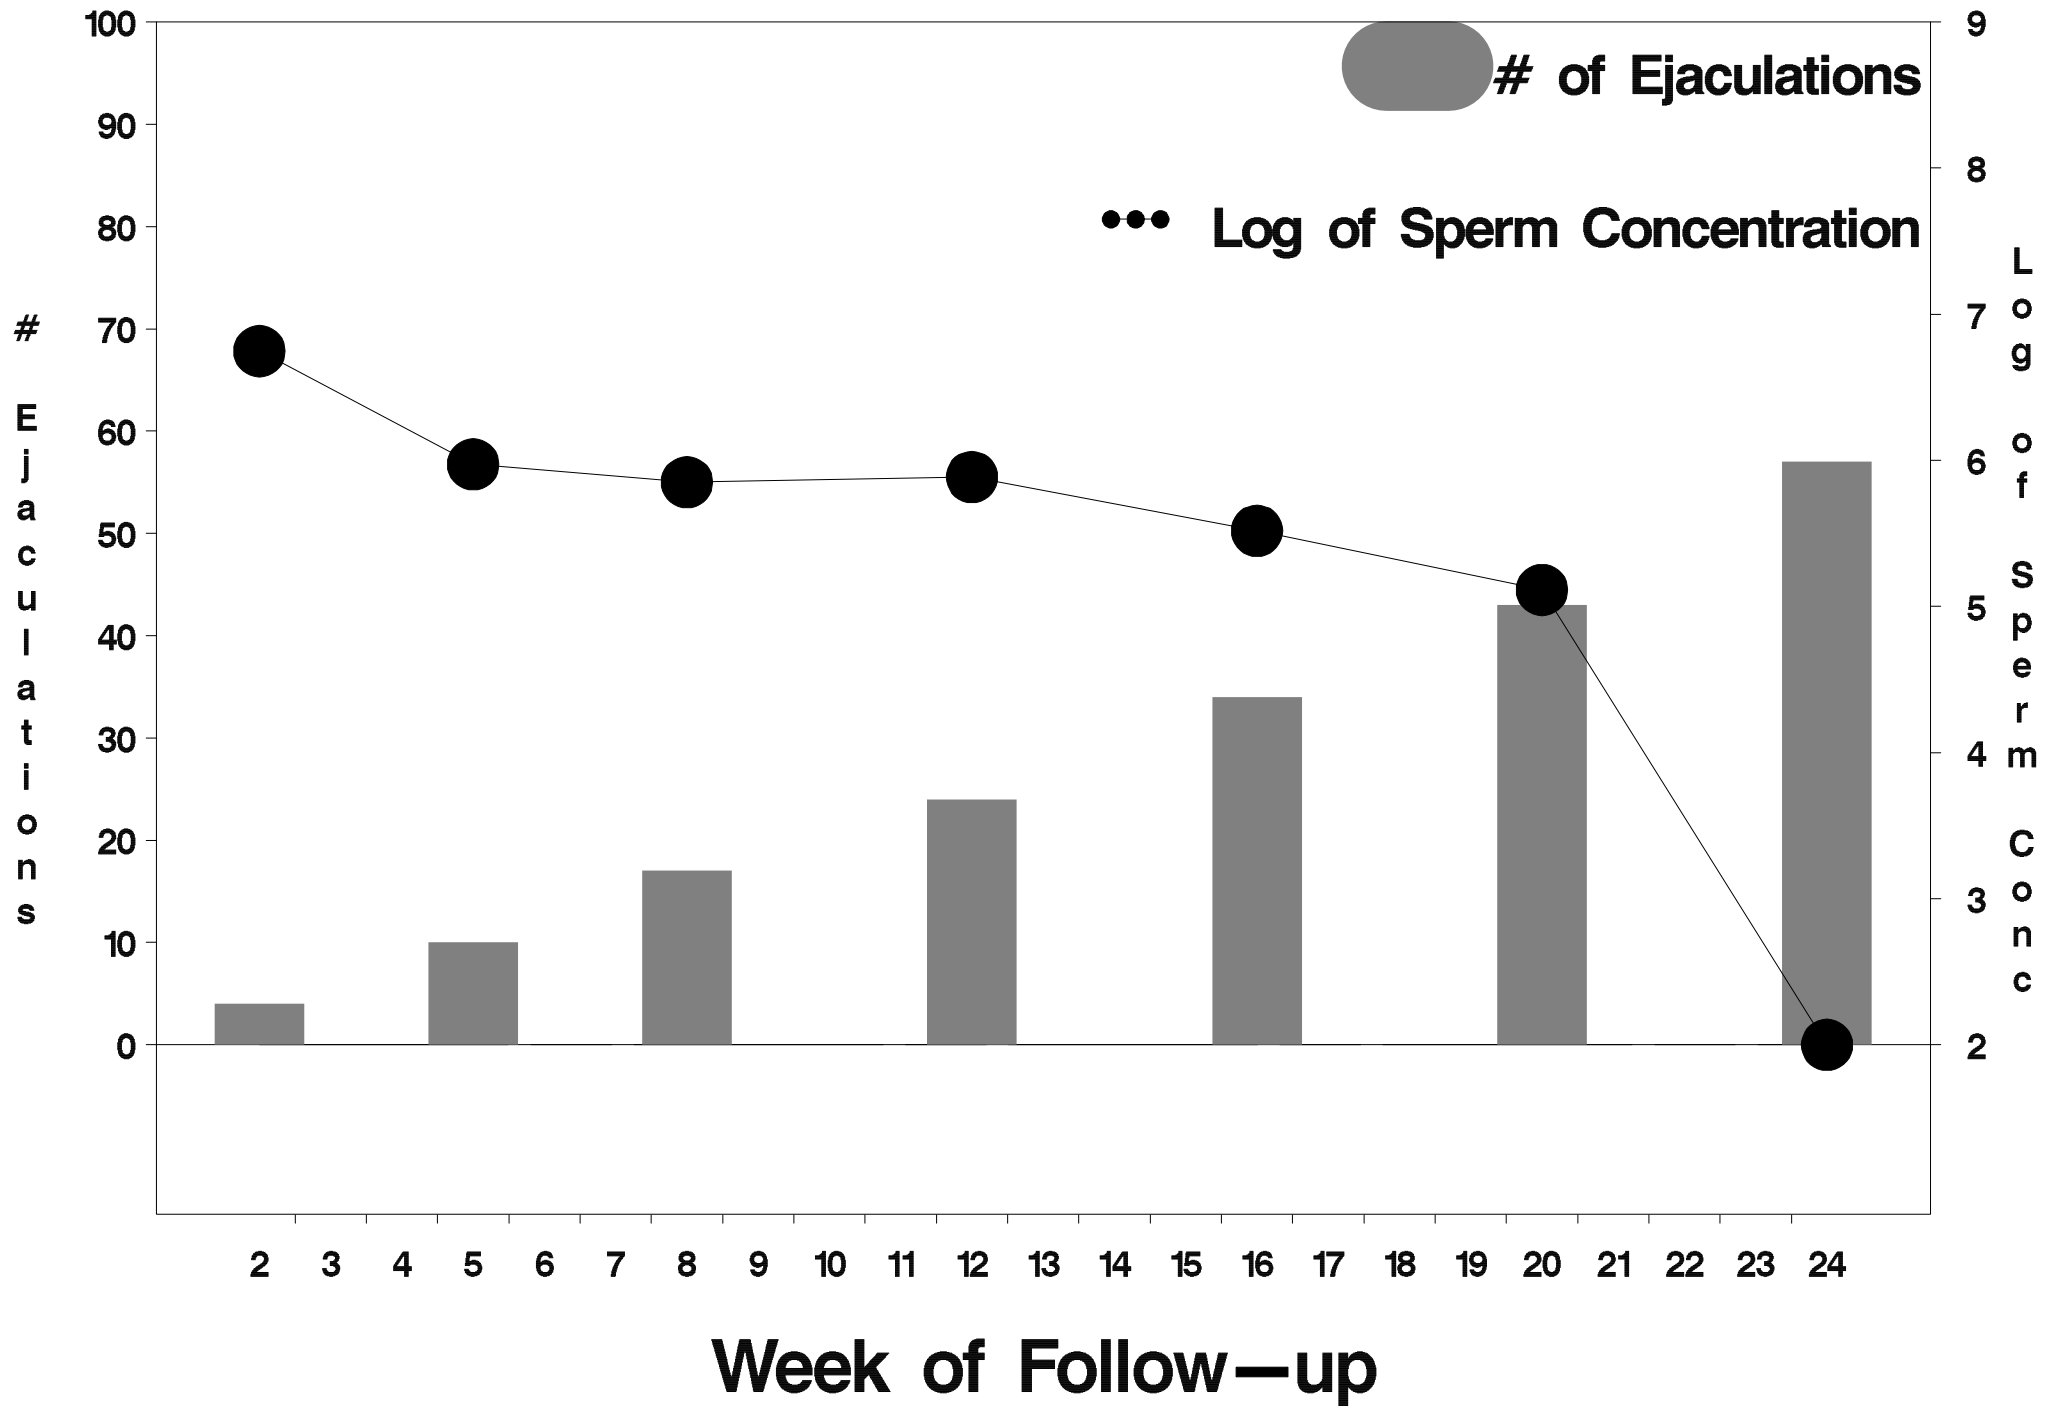

# Participant number= 317

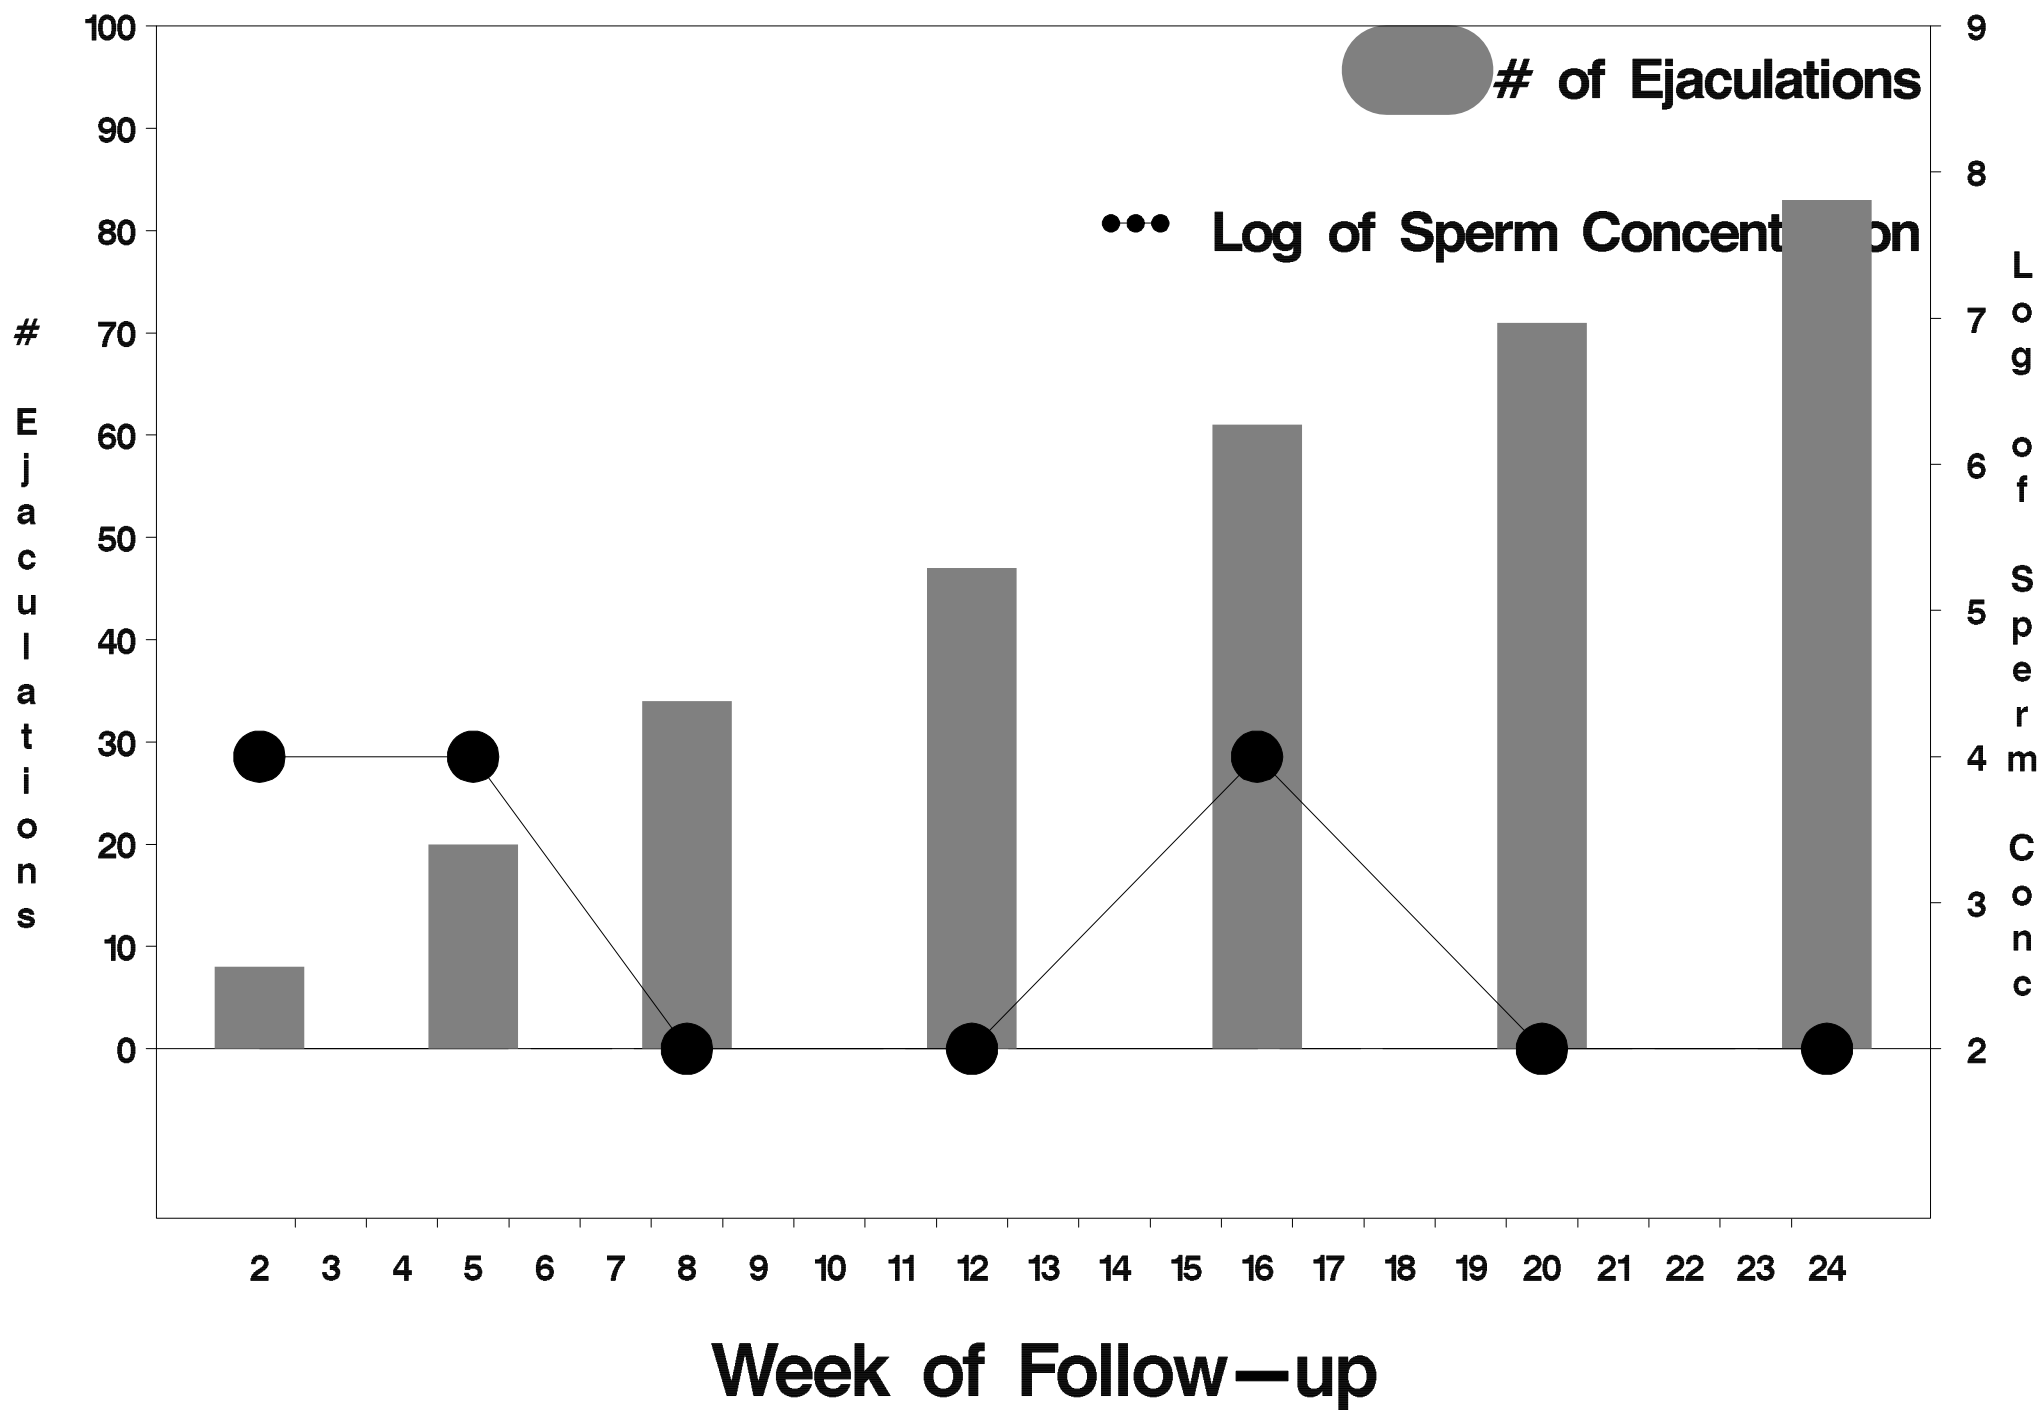

# Participant number= 318

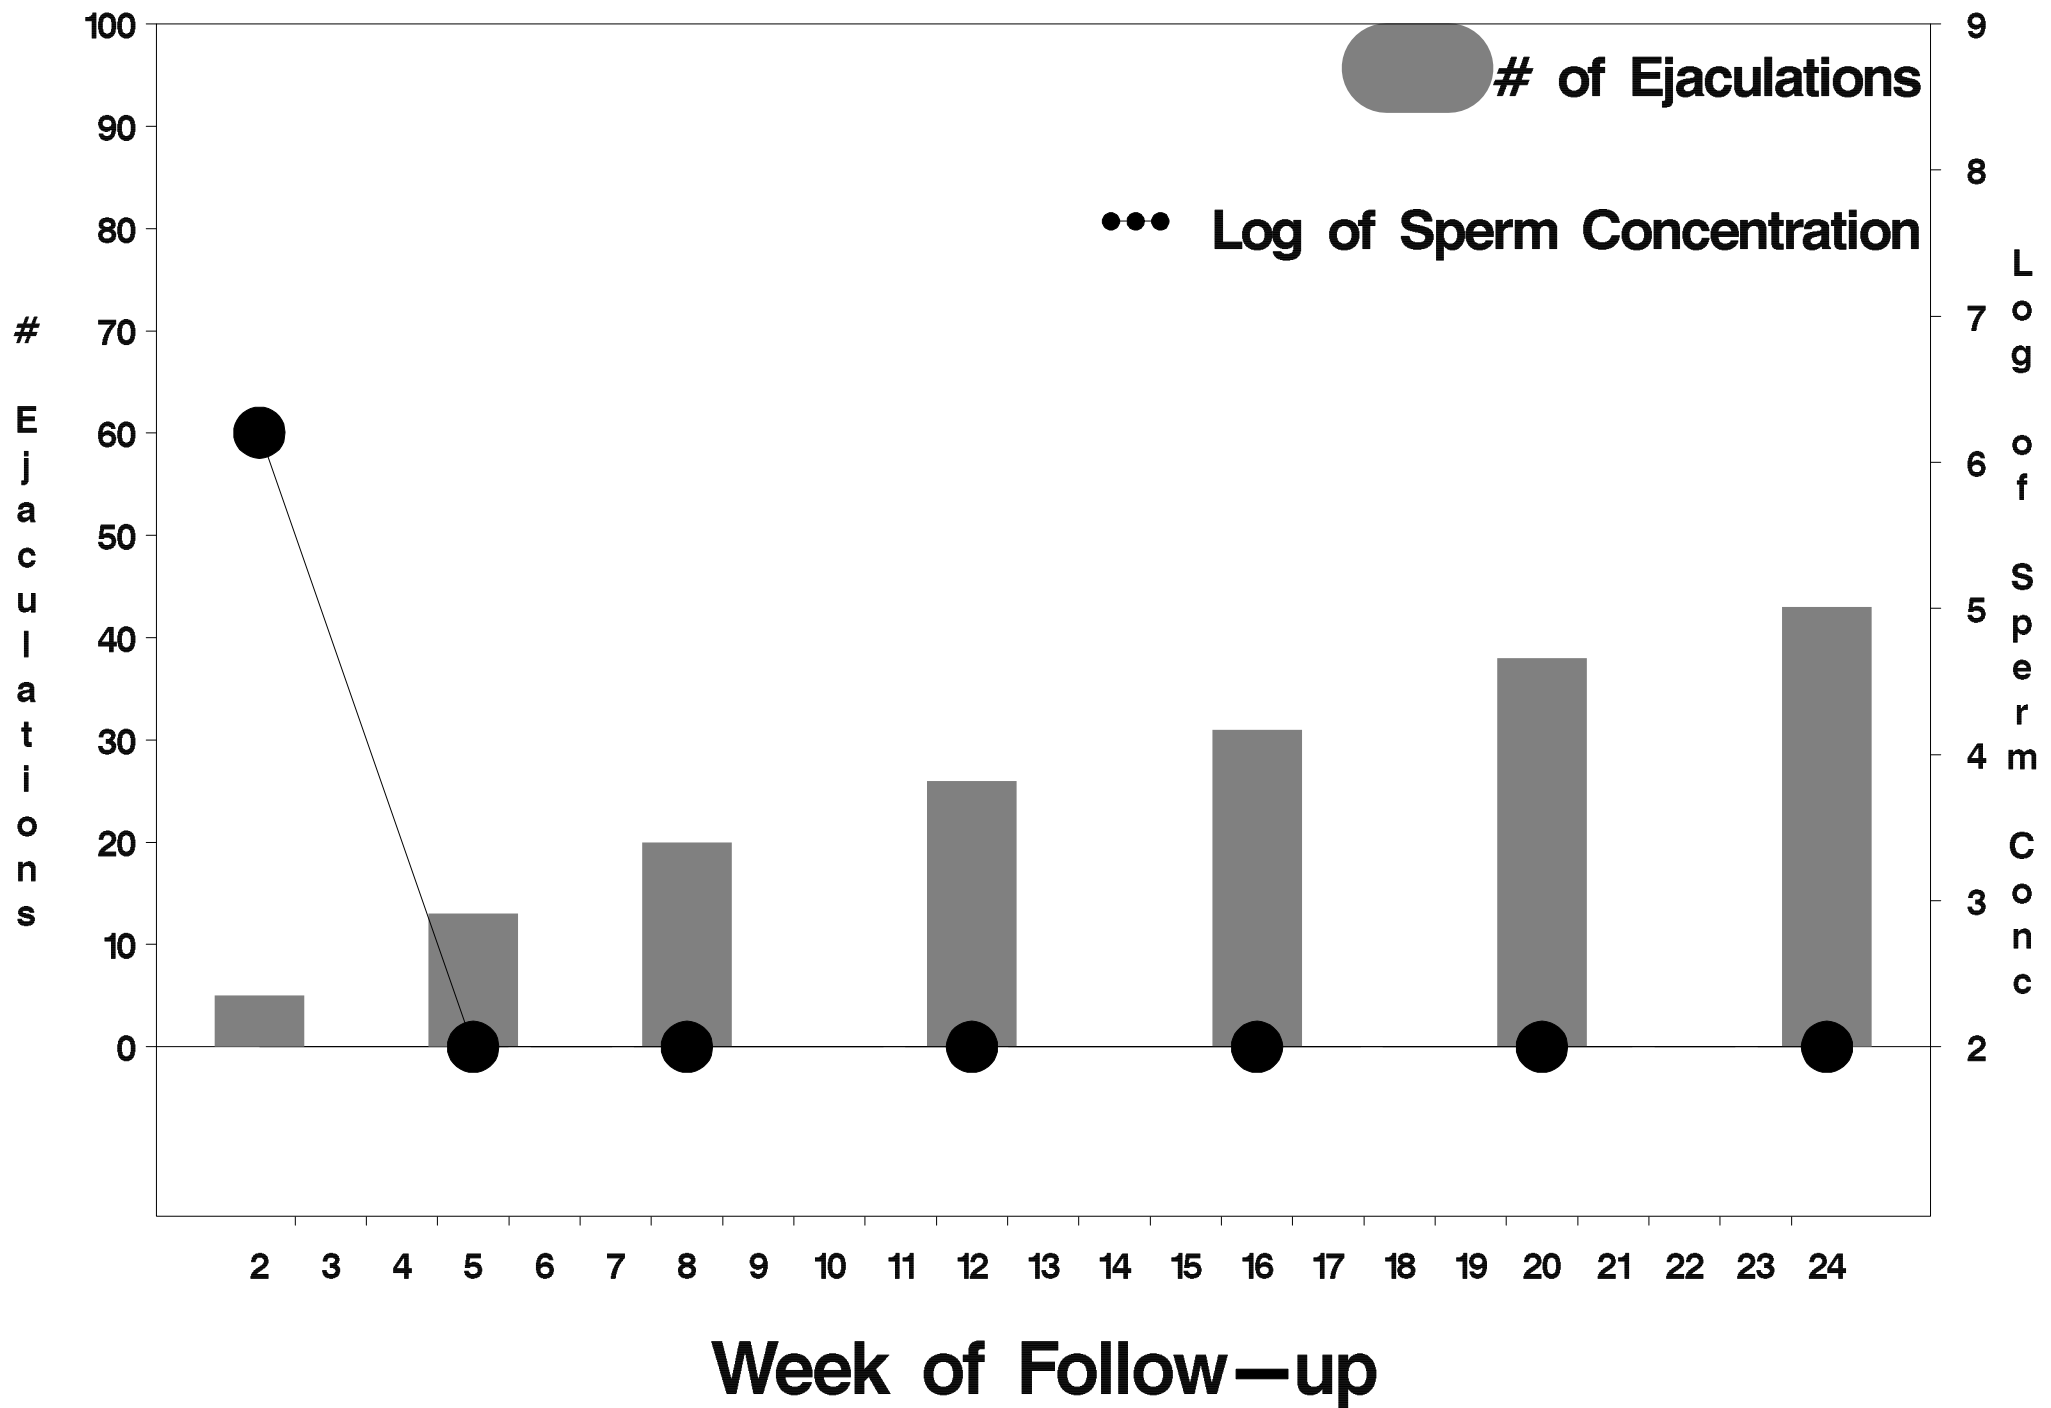

# Participant number= 319

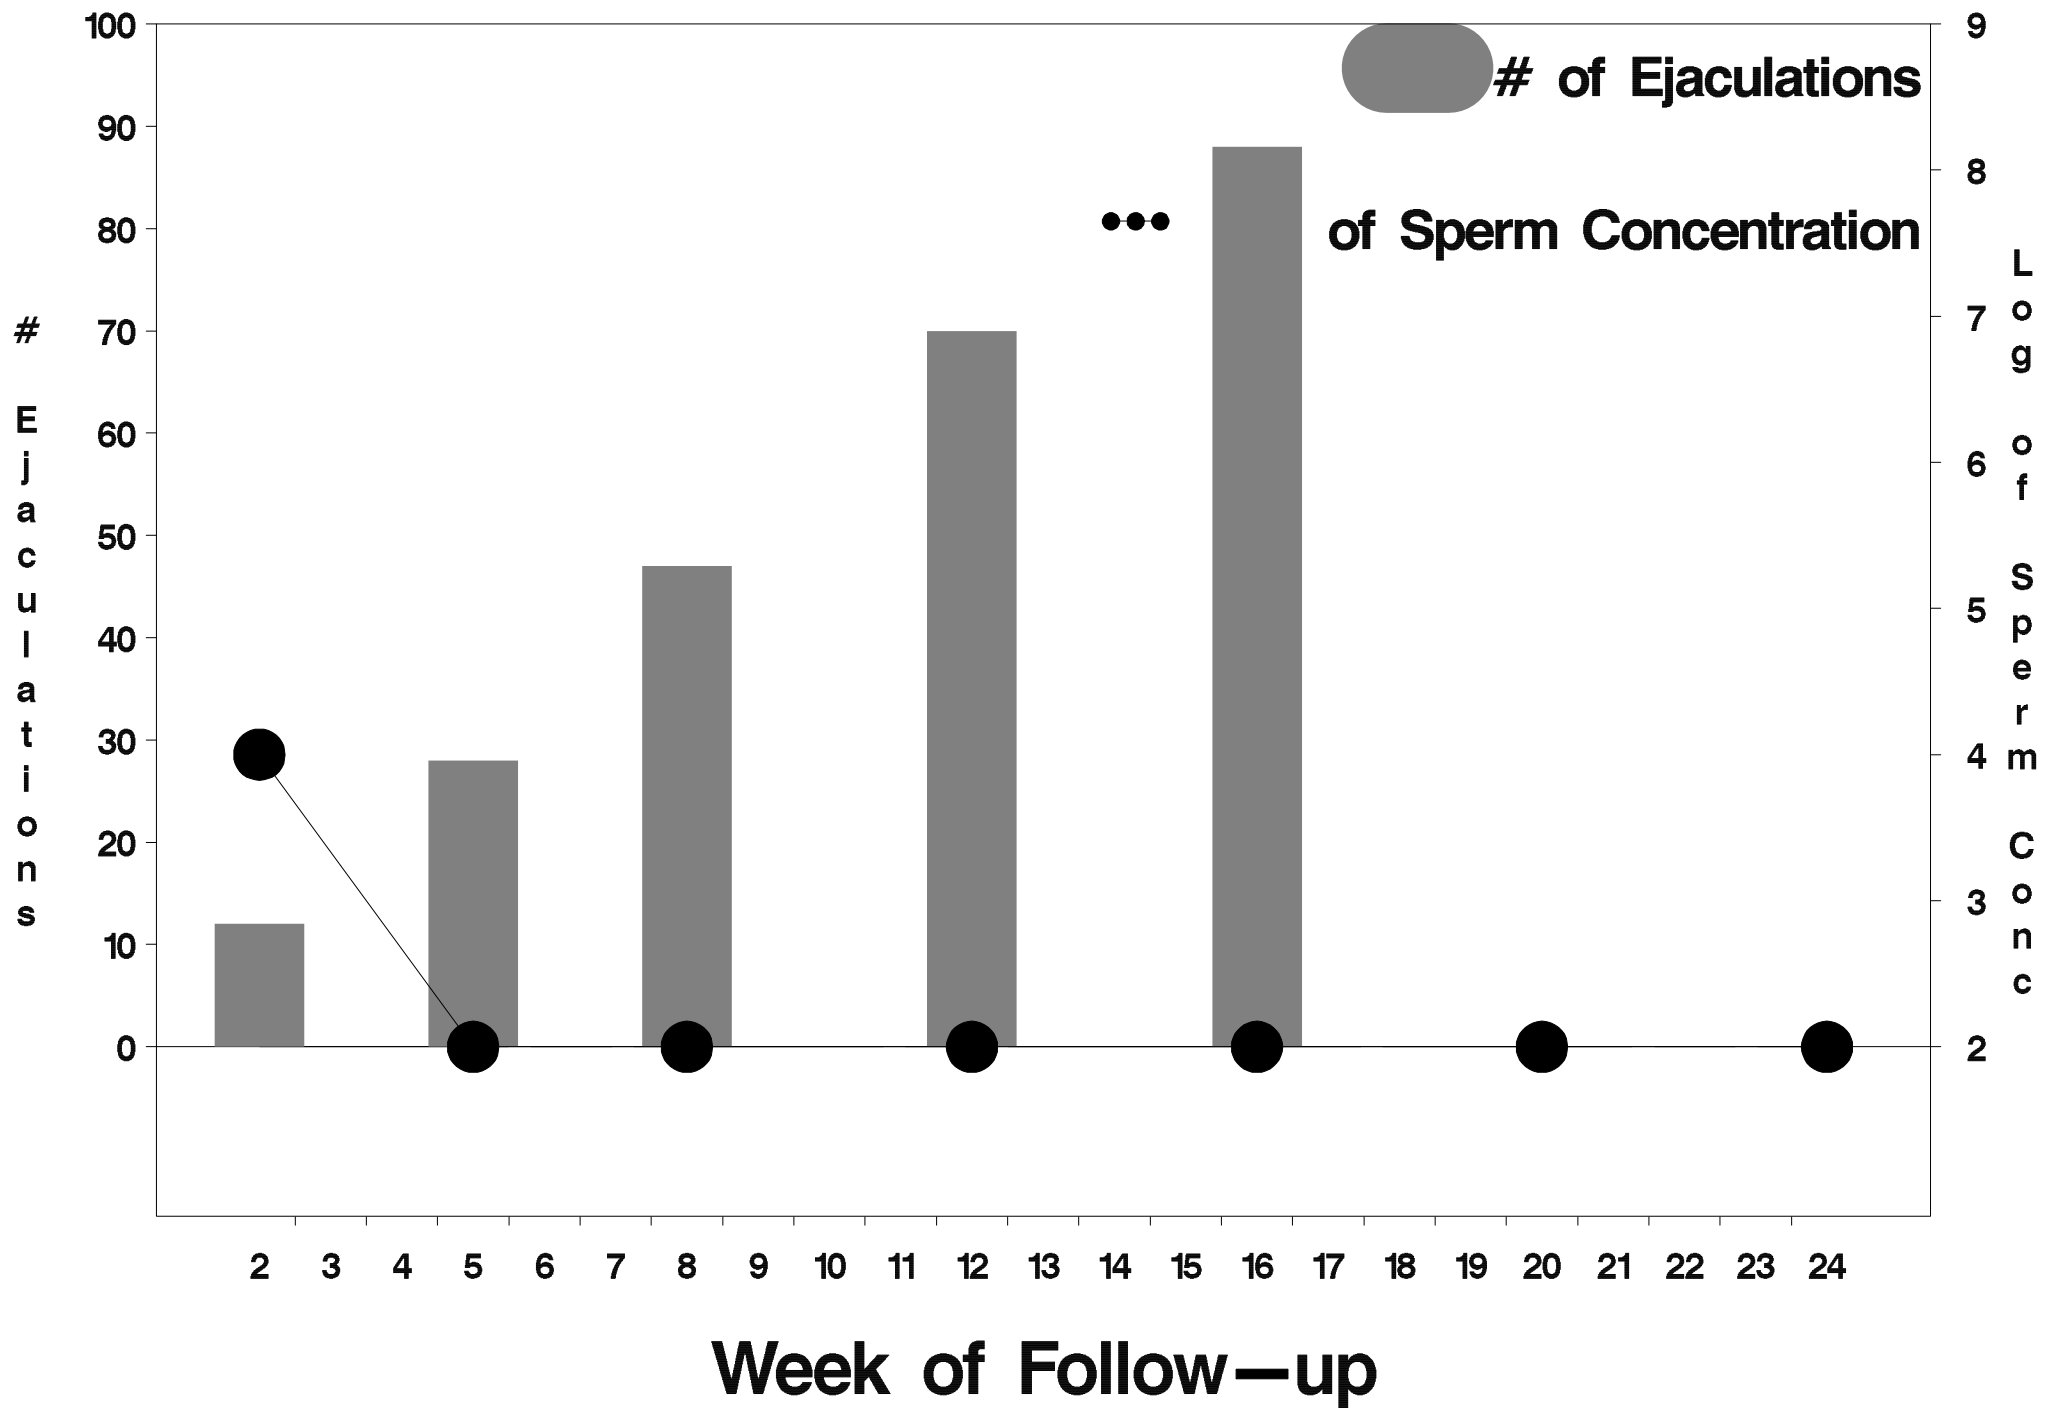

# Participant number= 320

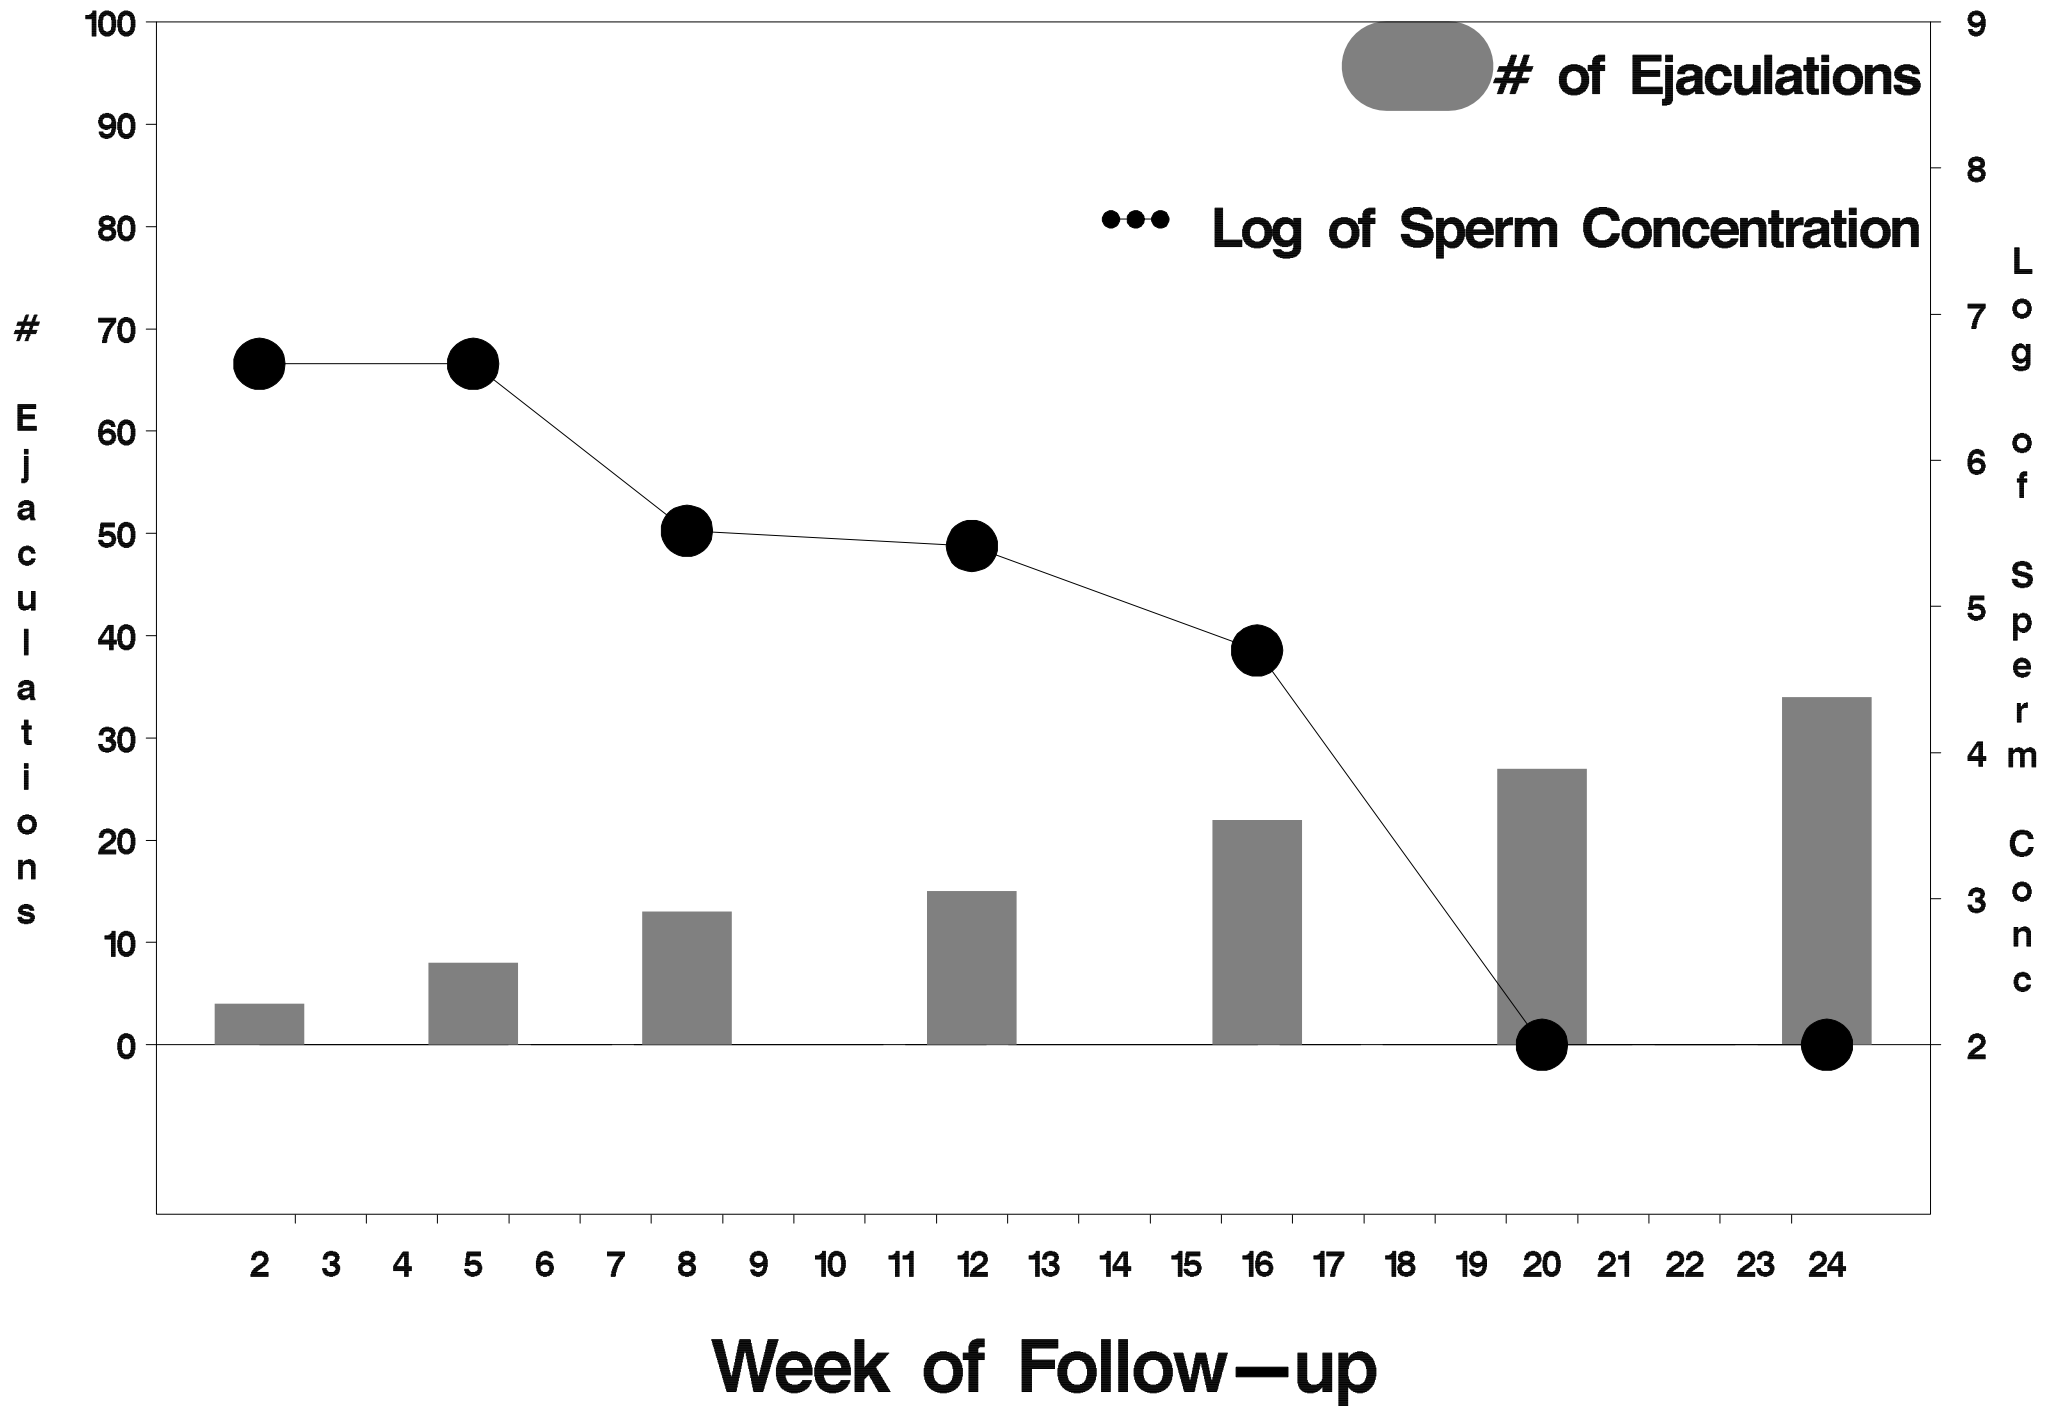

# Participant number= 321

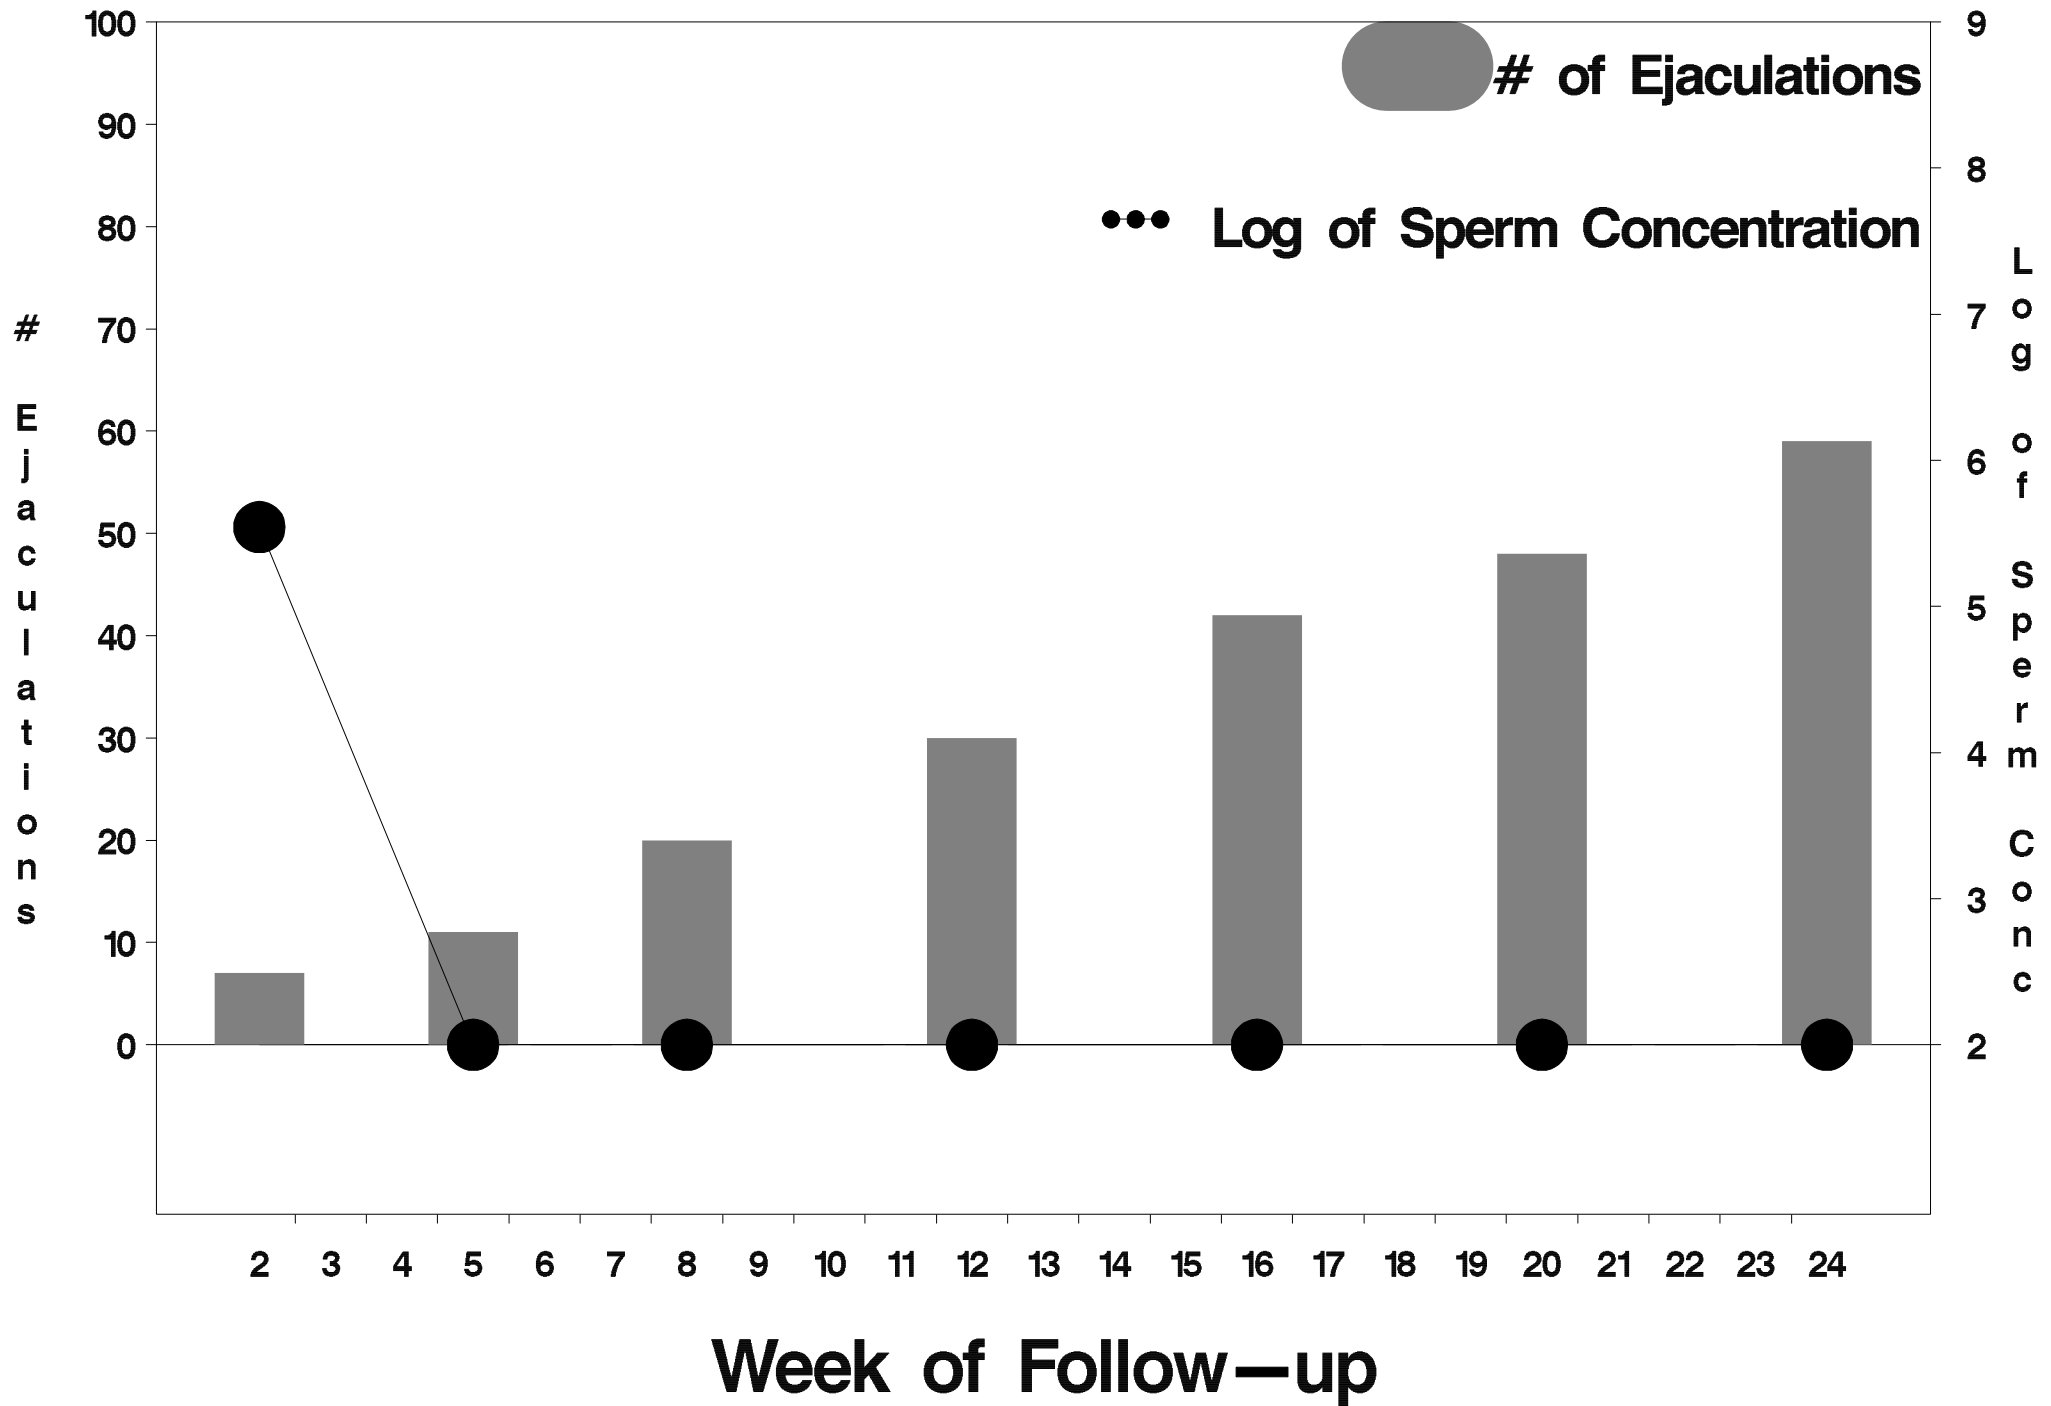



# Participant number= 322

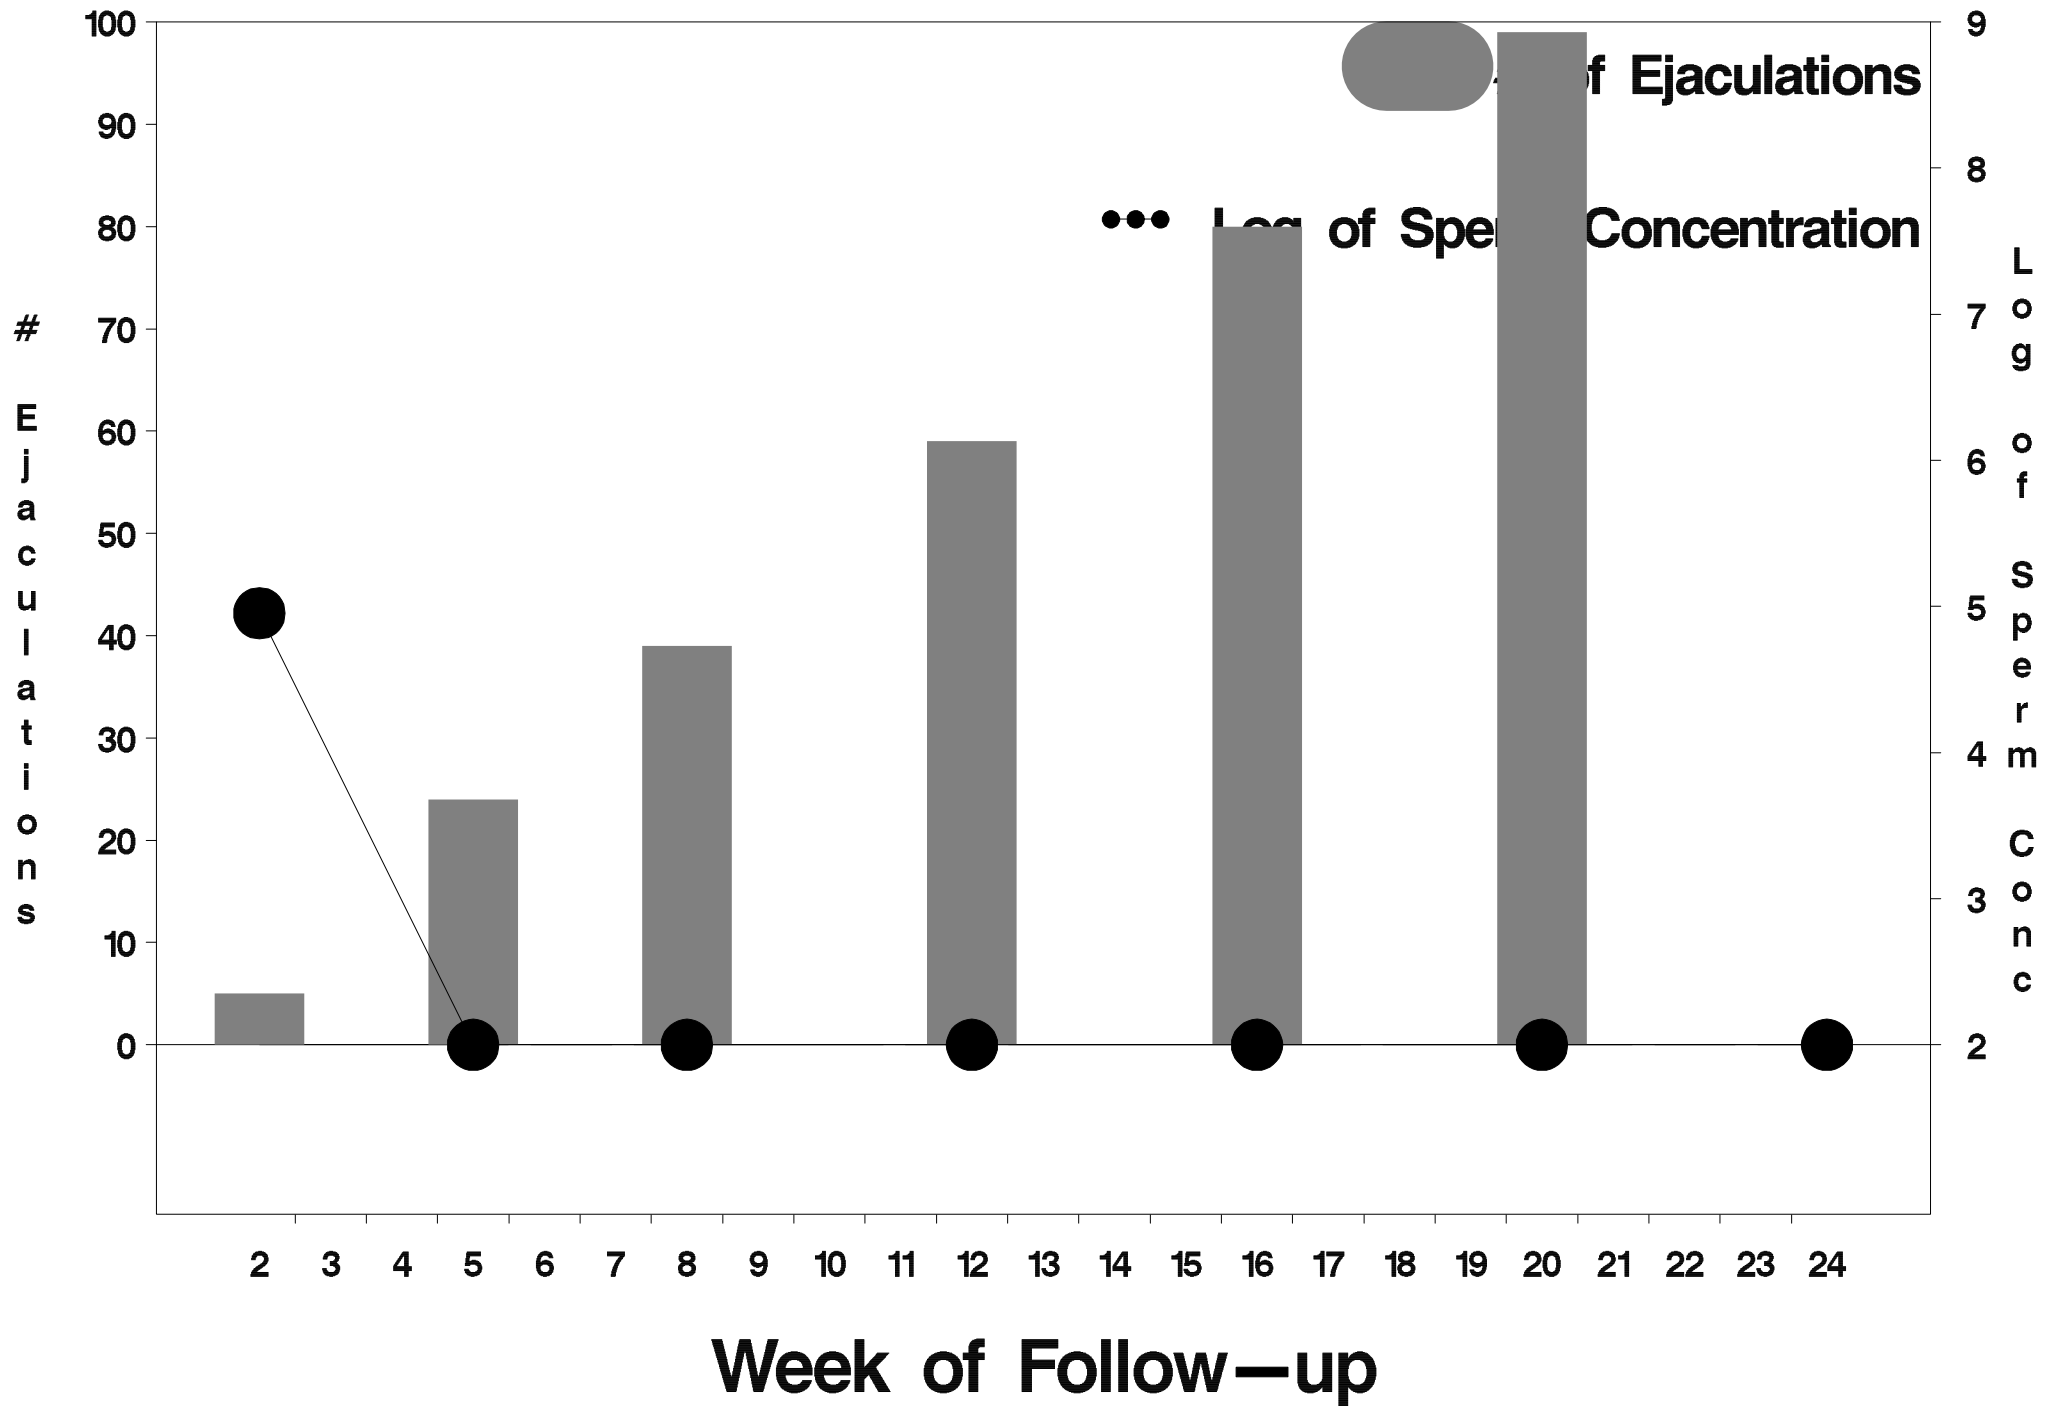

# Participant number= 323

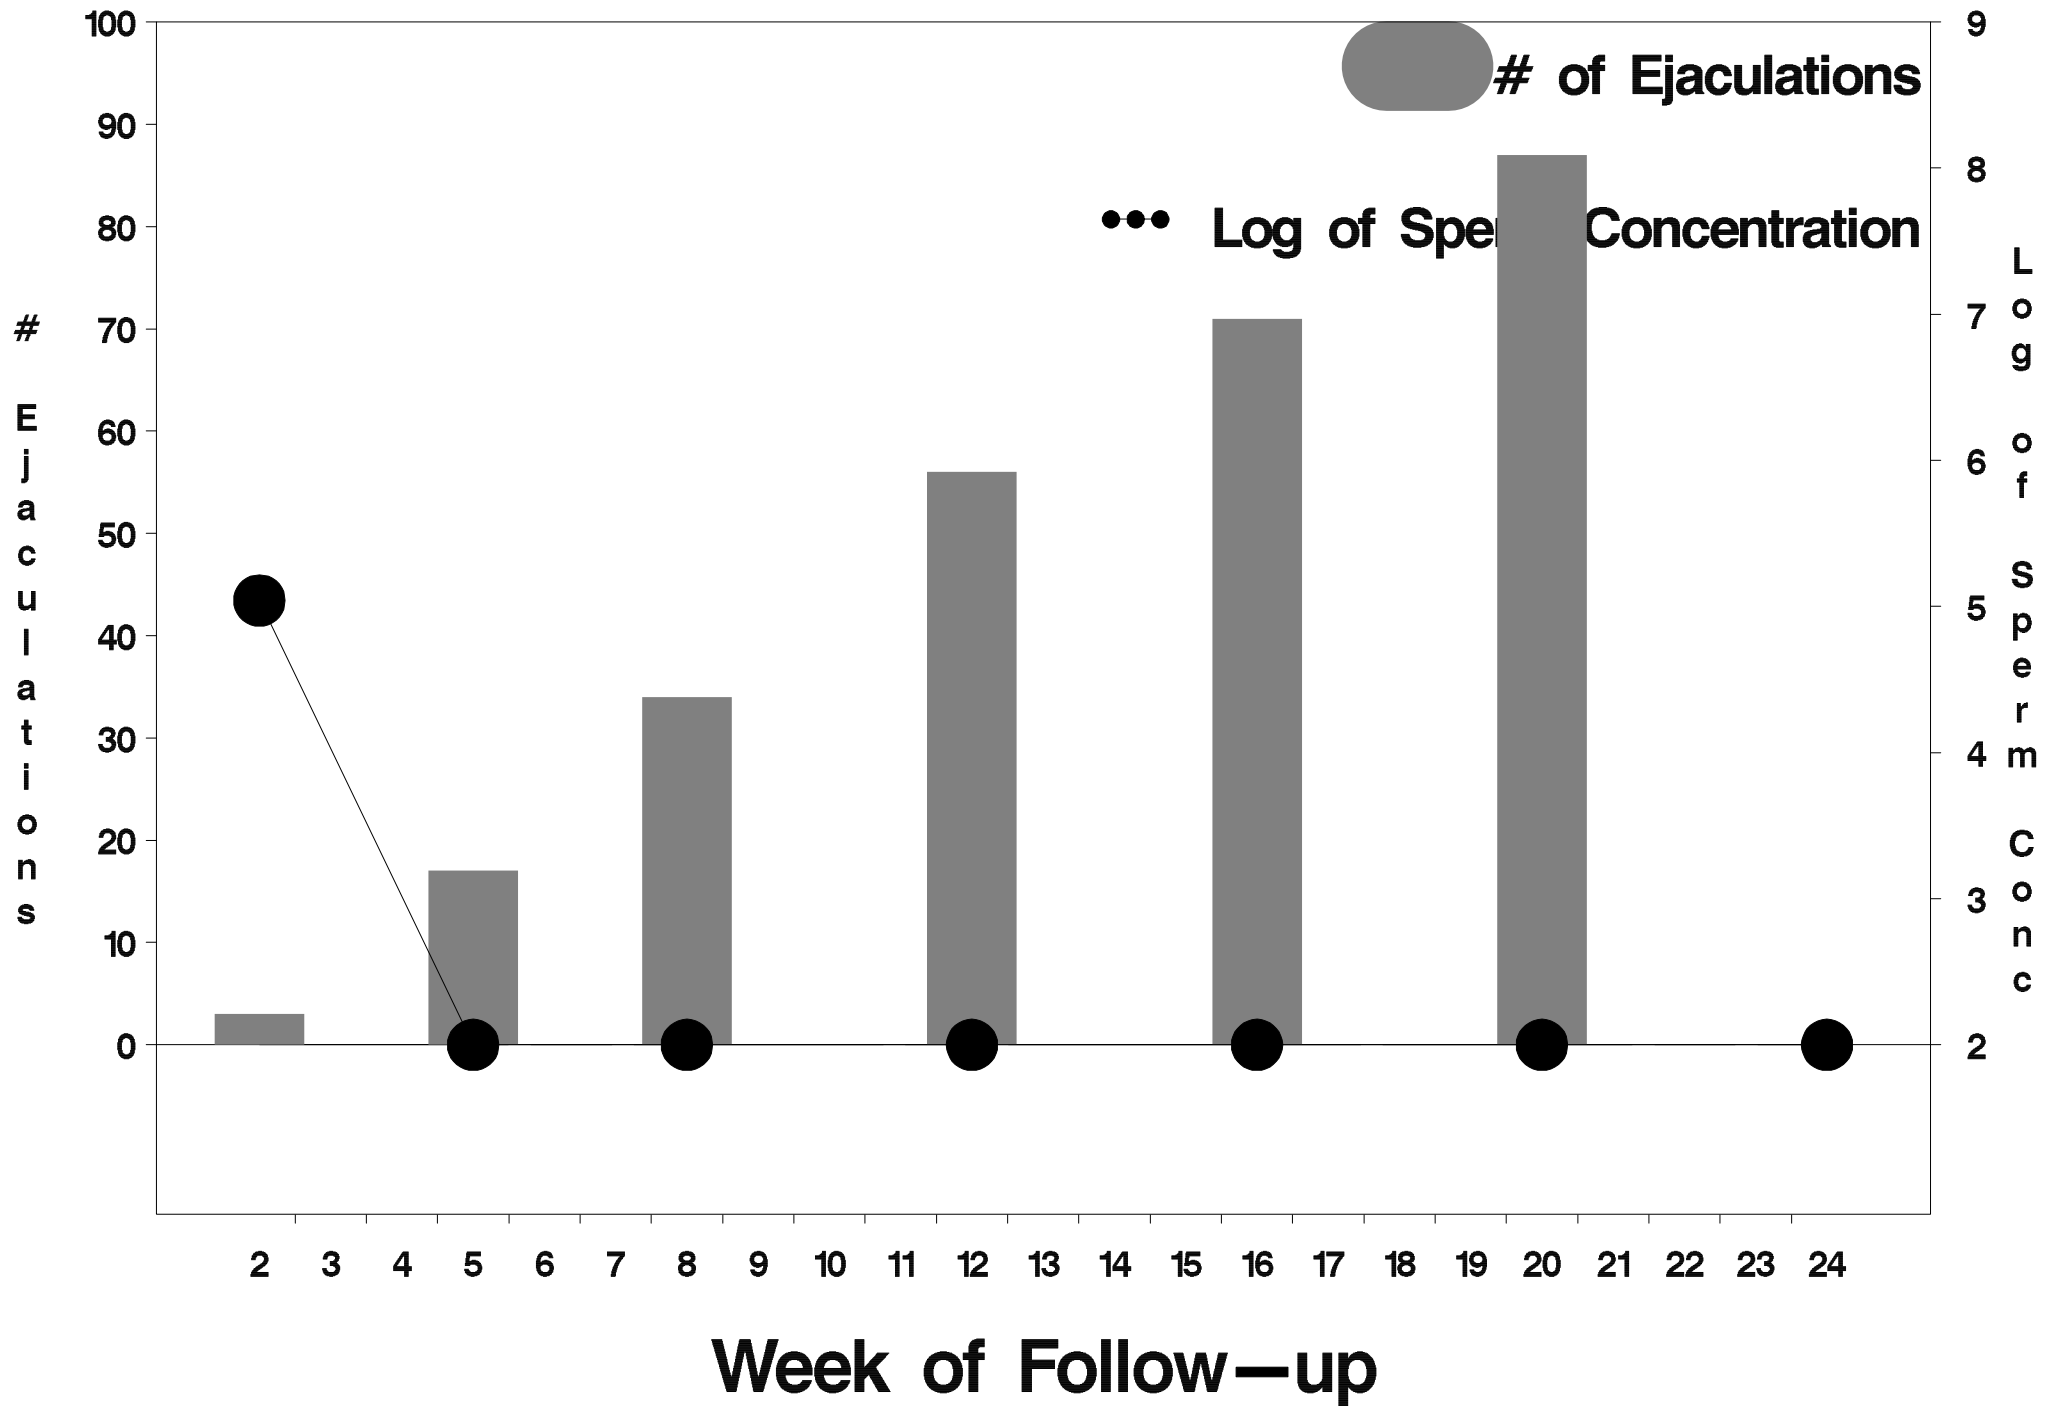

# Participant number= 324

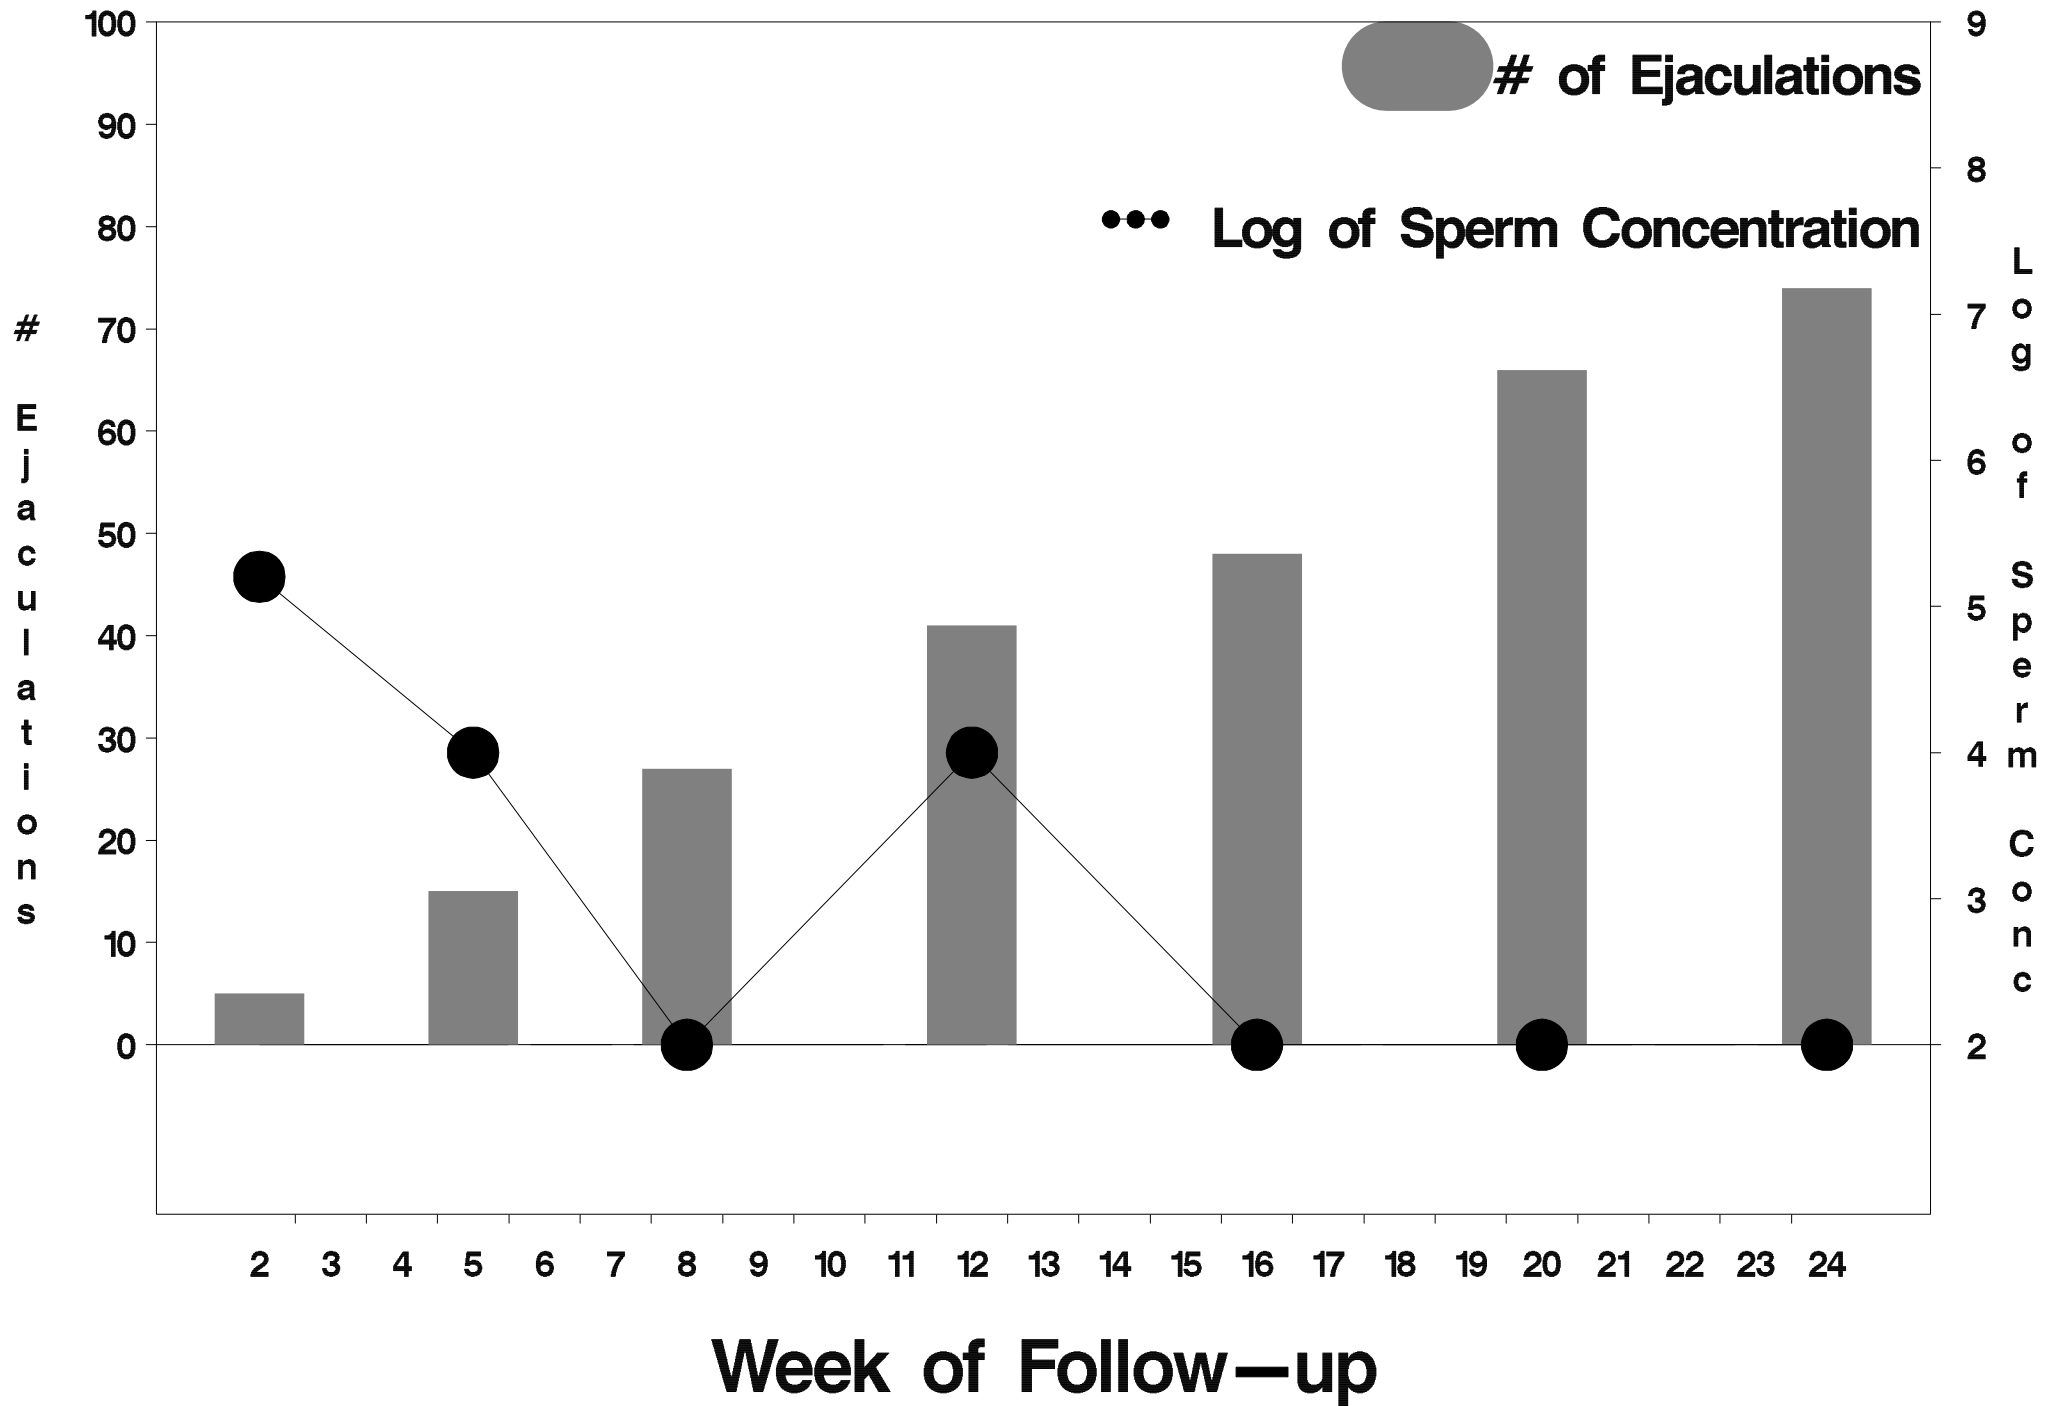

# Participant number= 325

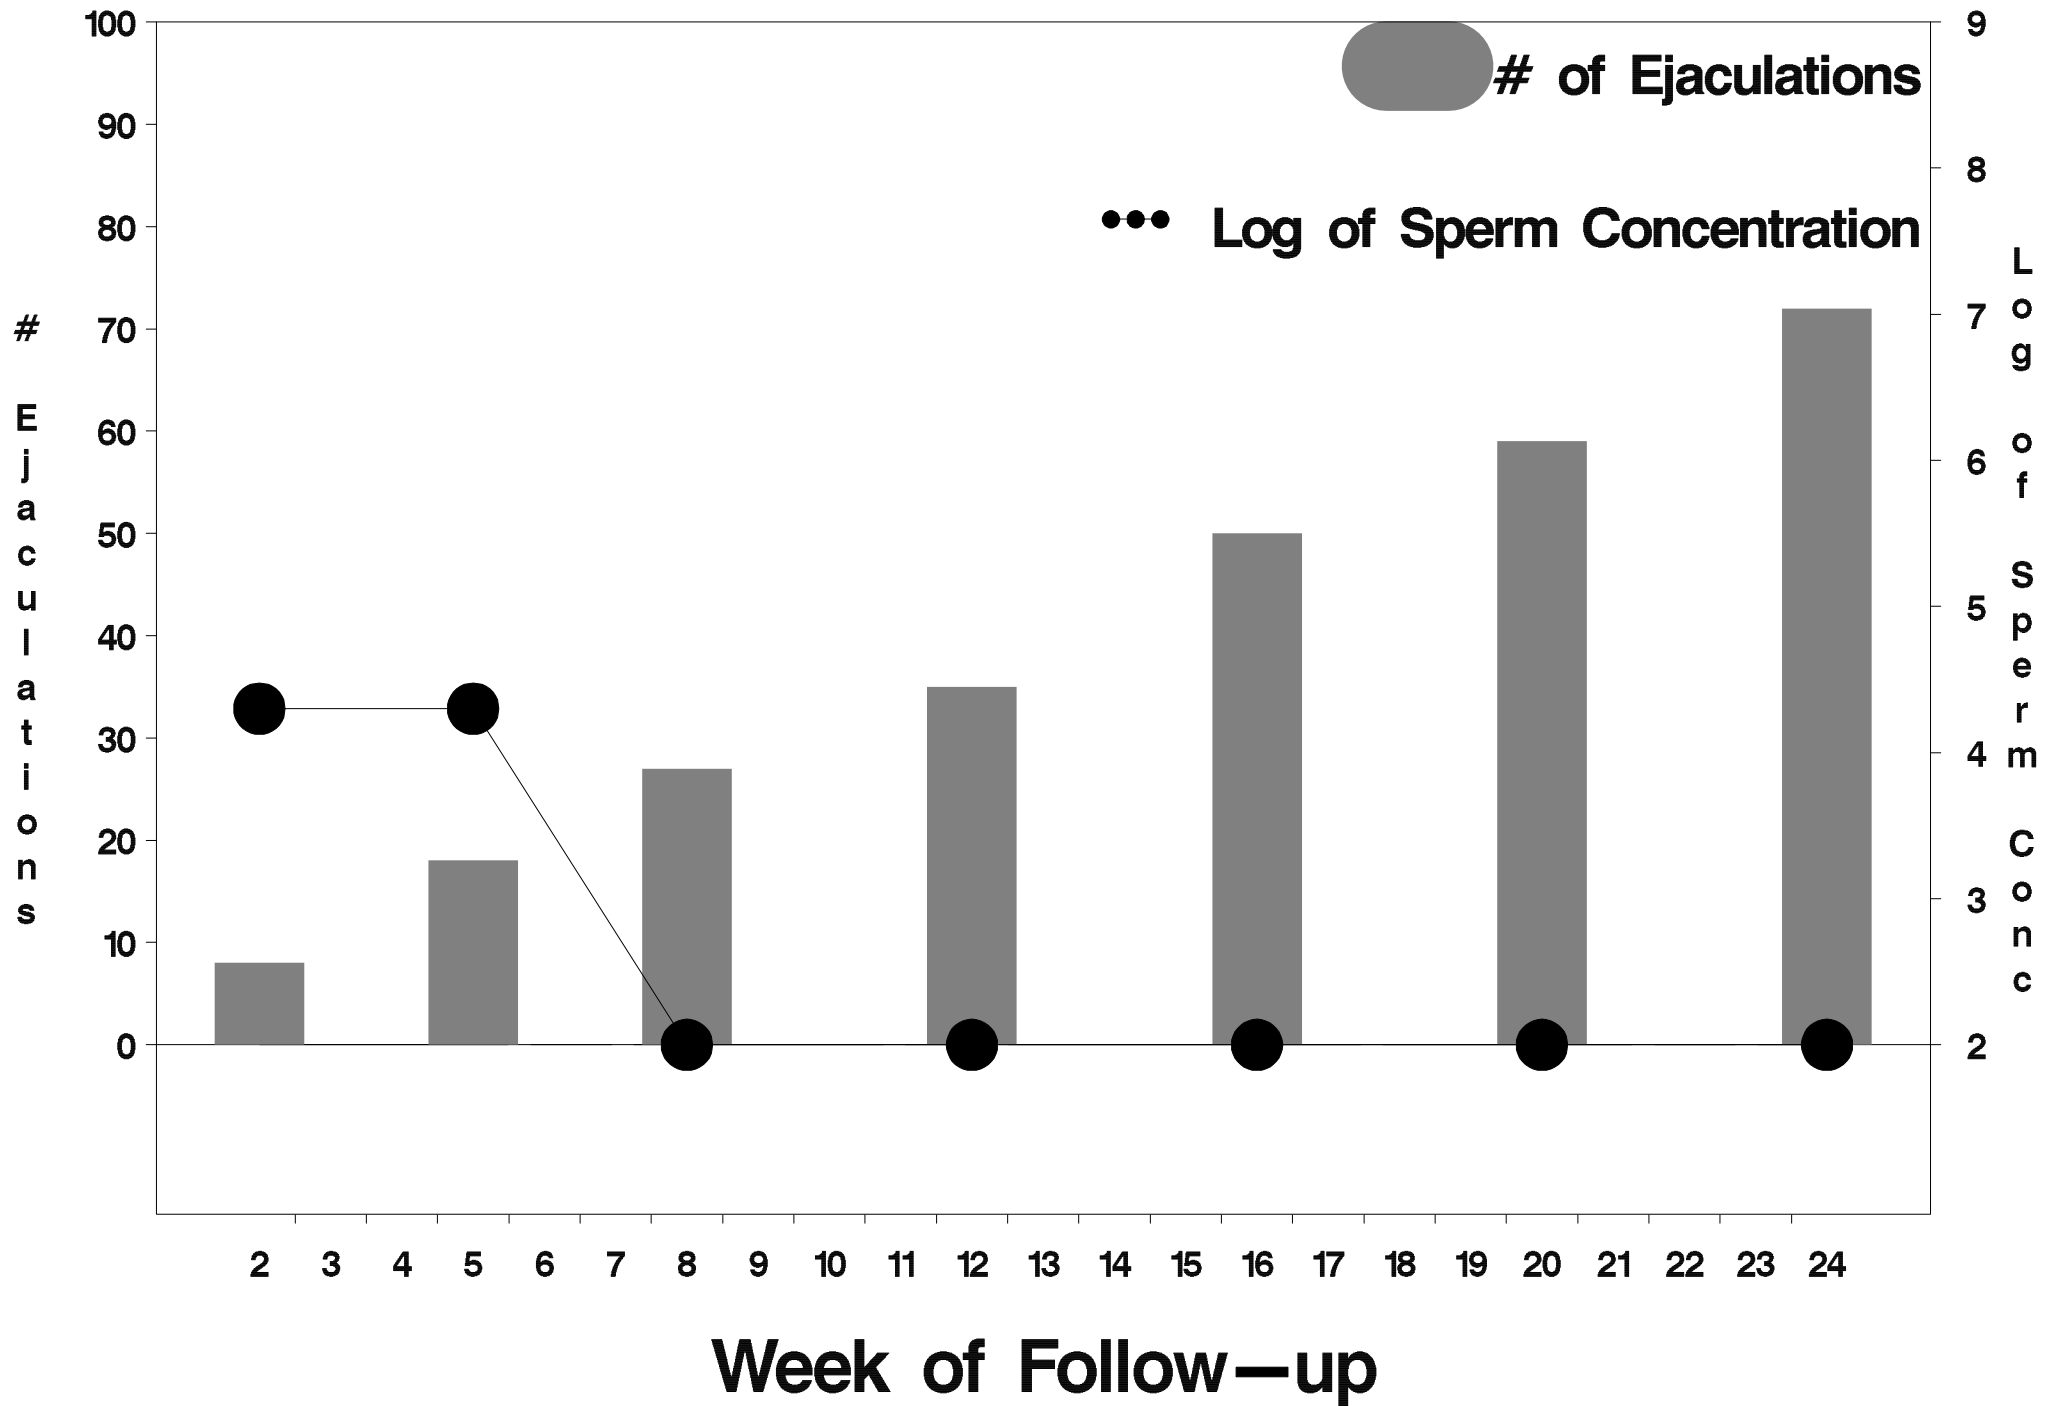

# Participant number= 326

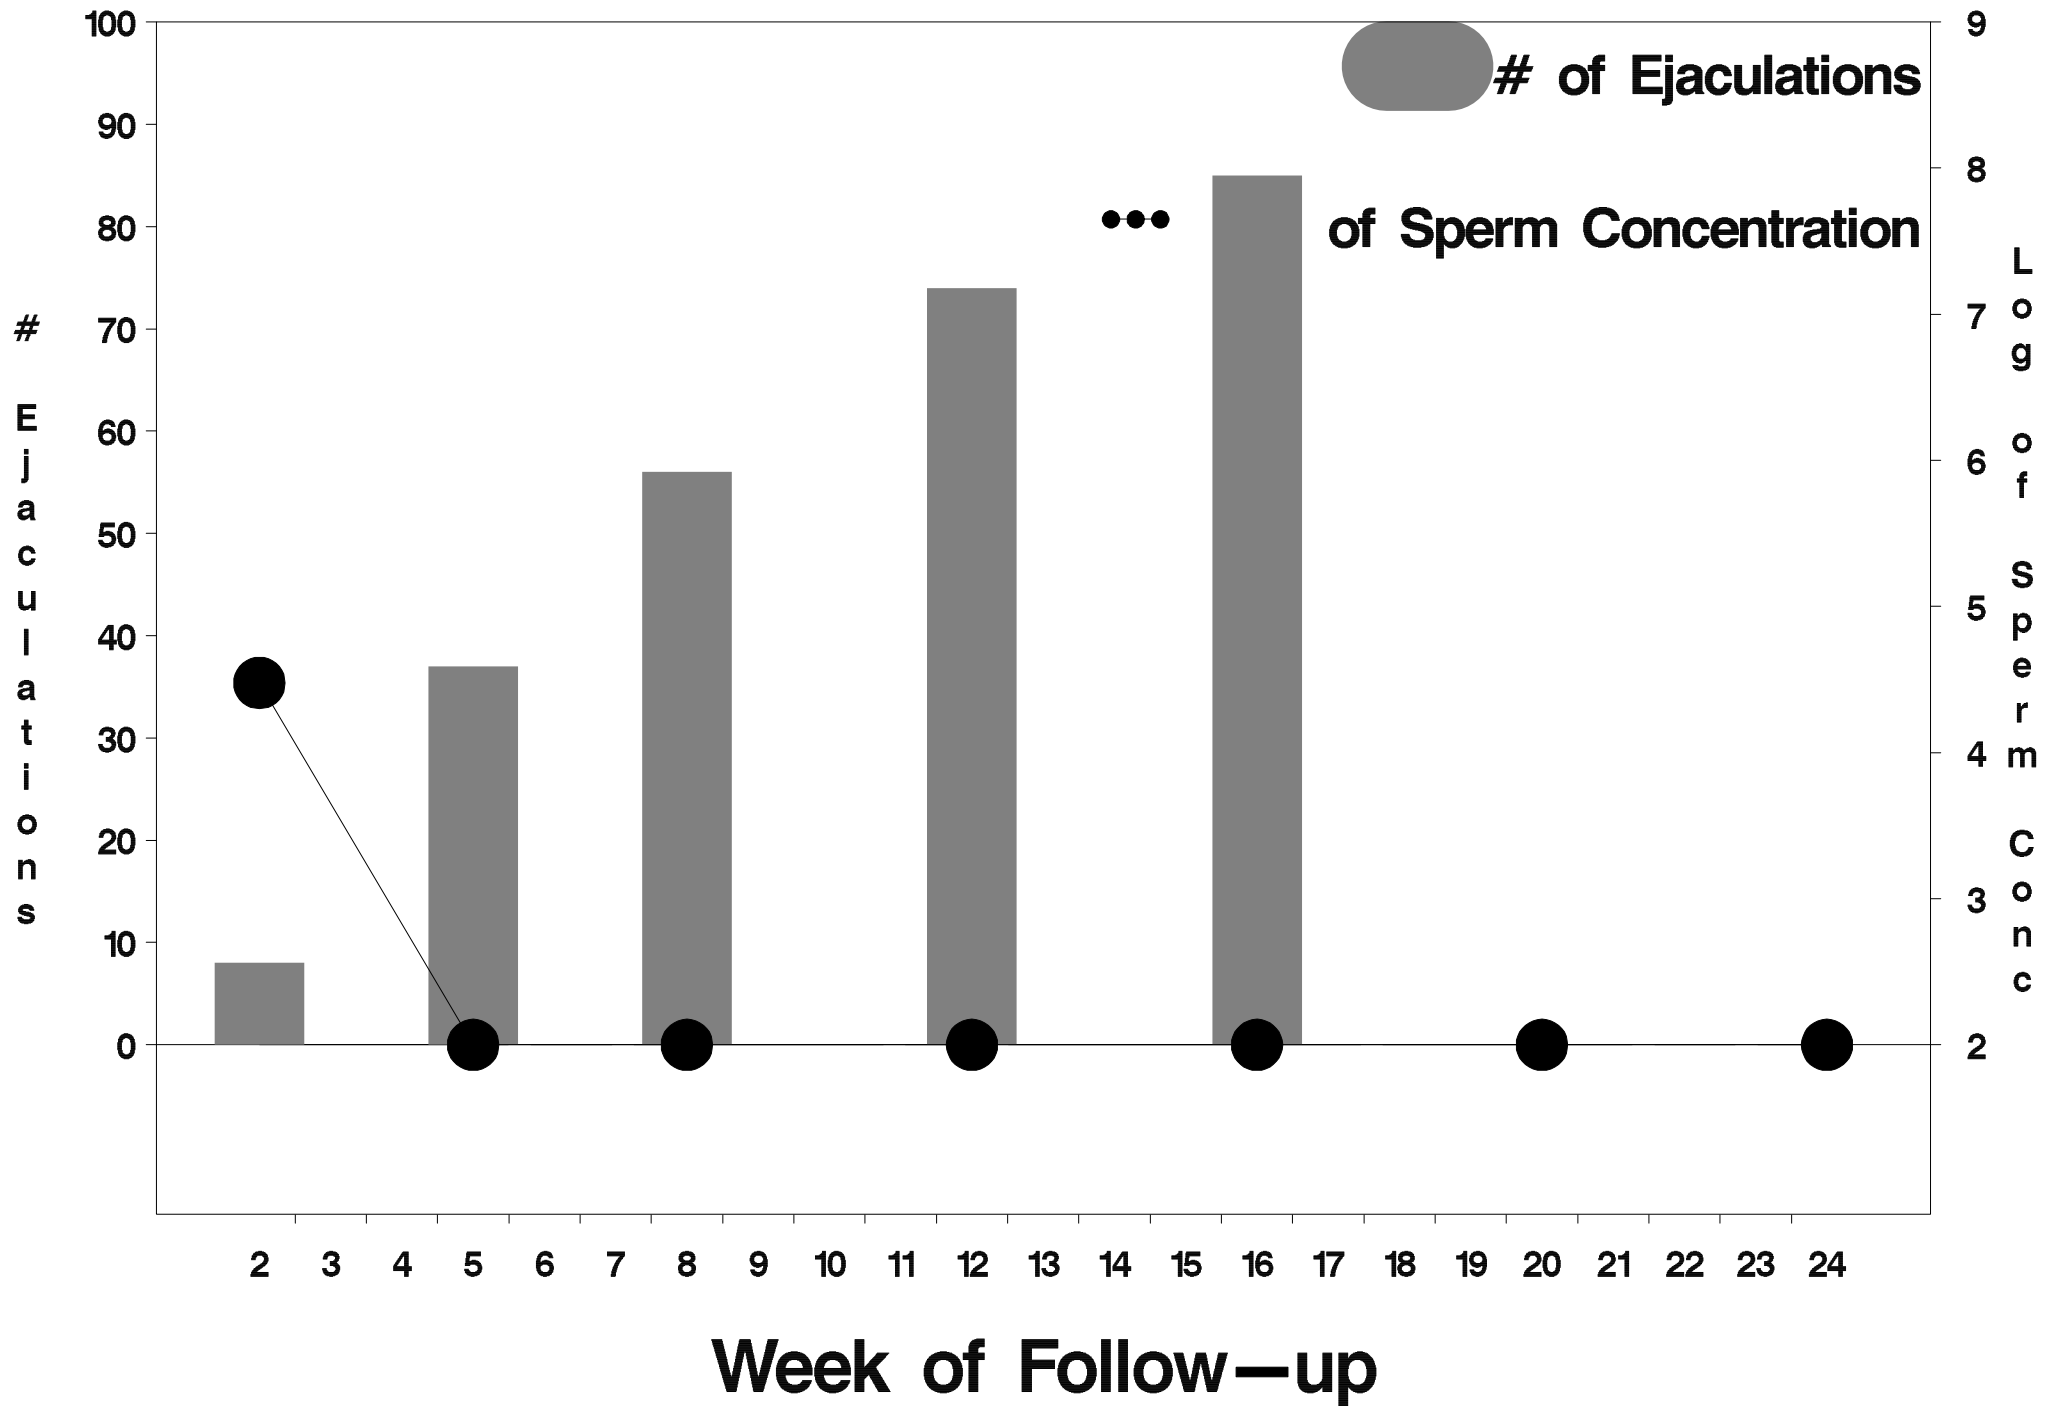

# Participant number= 327

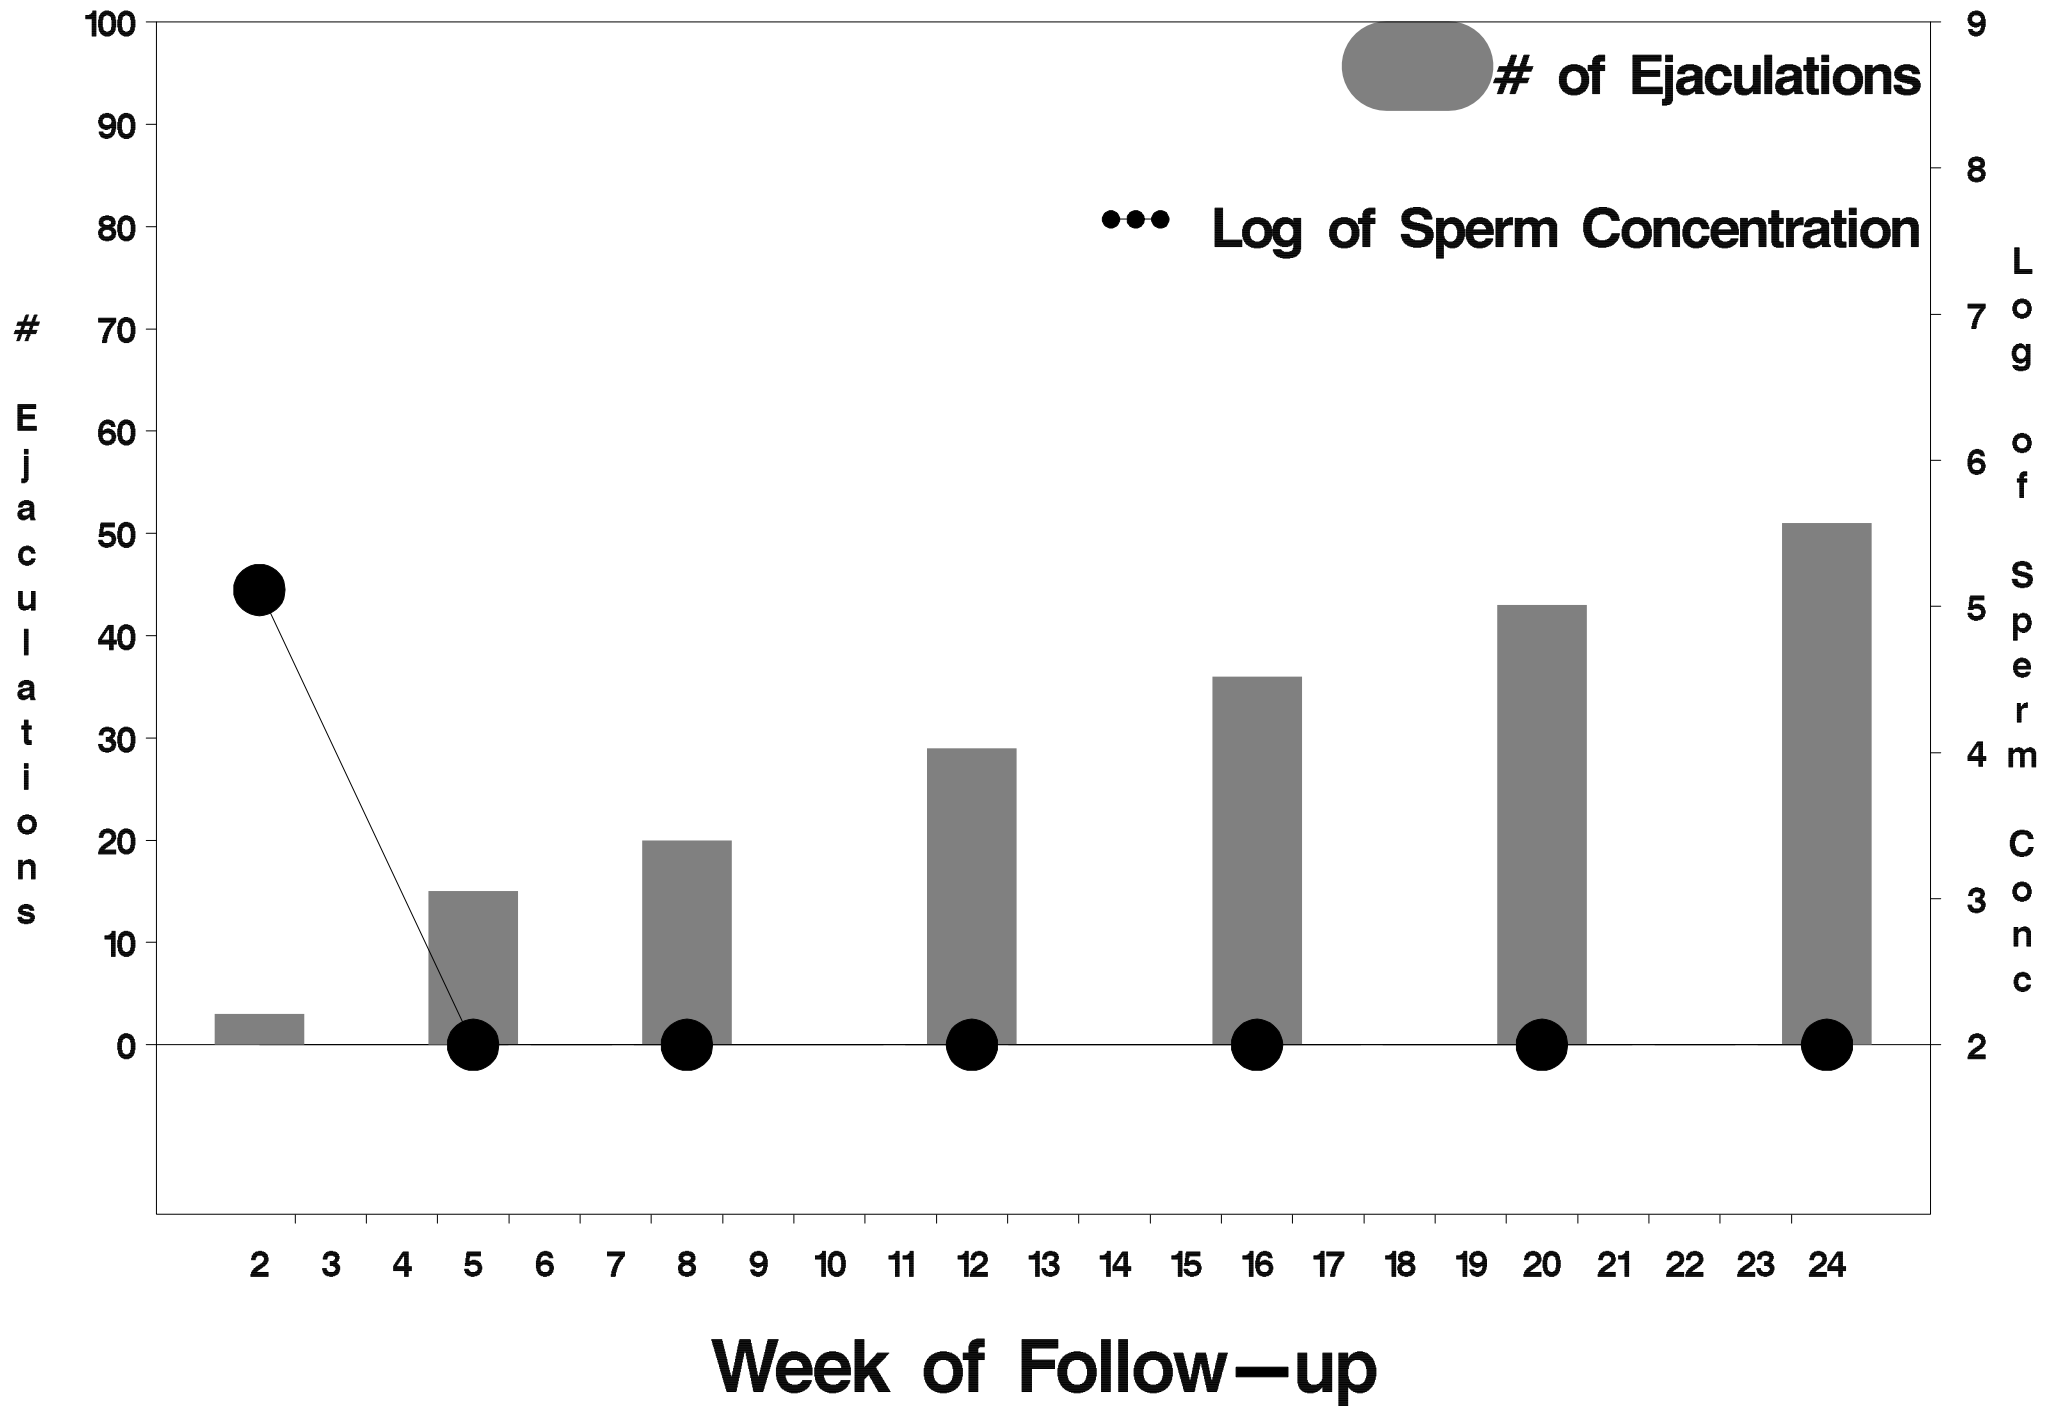

# Participant number= 328

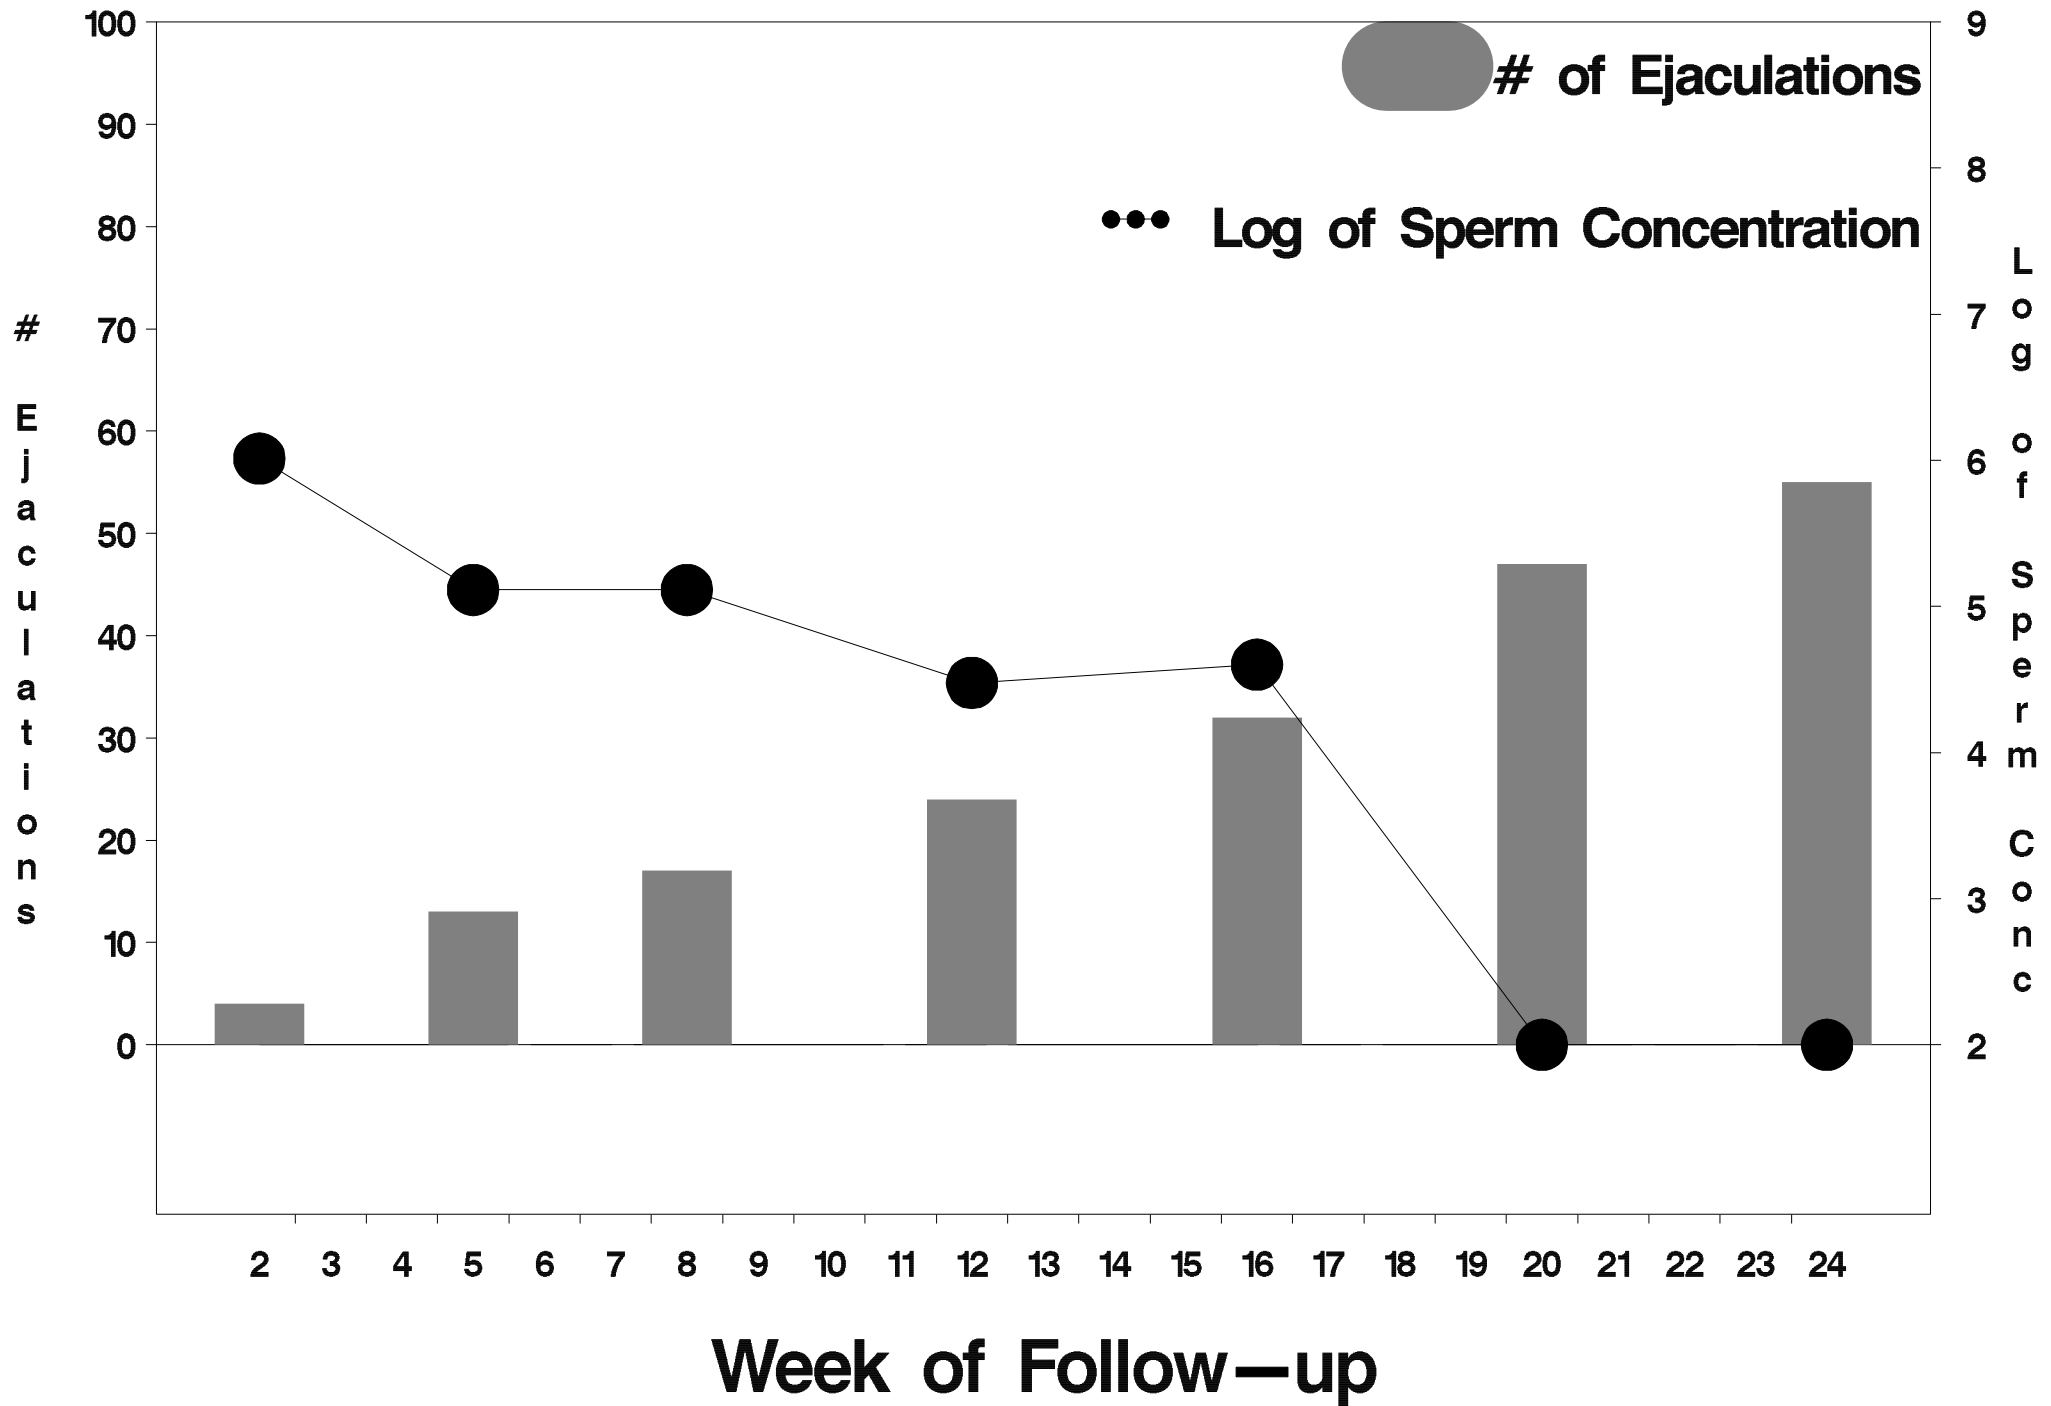

# Participant number= 329

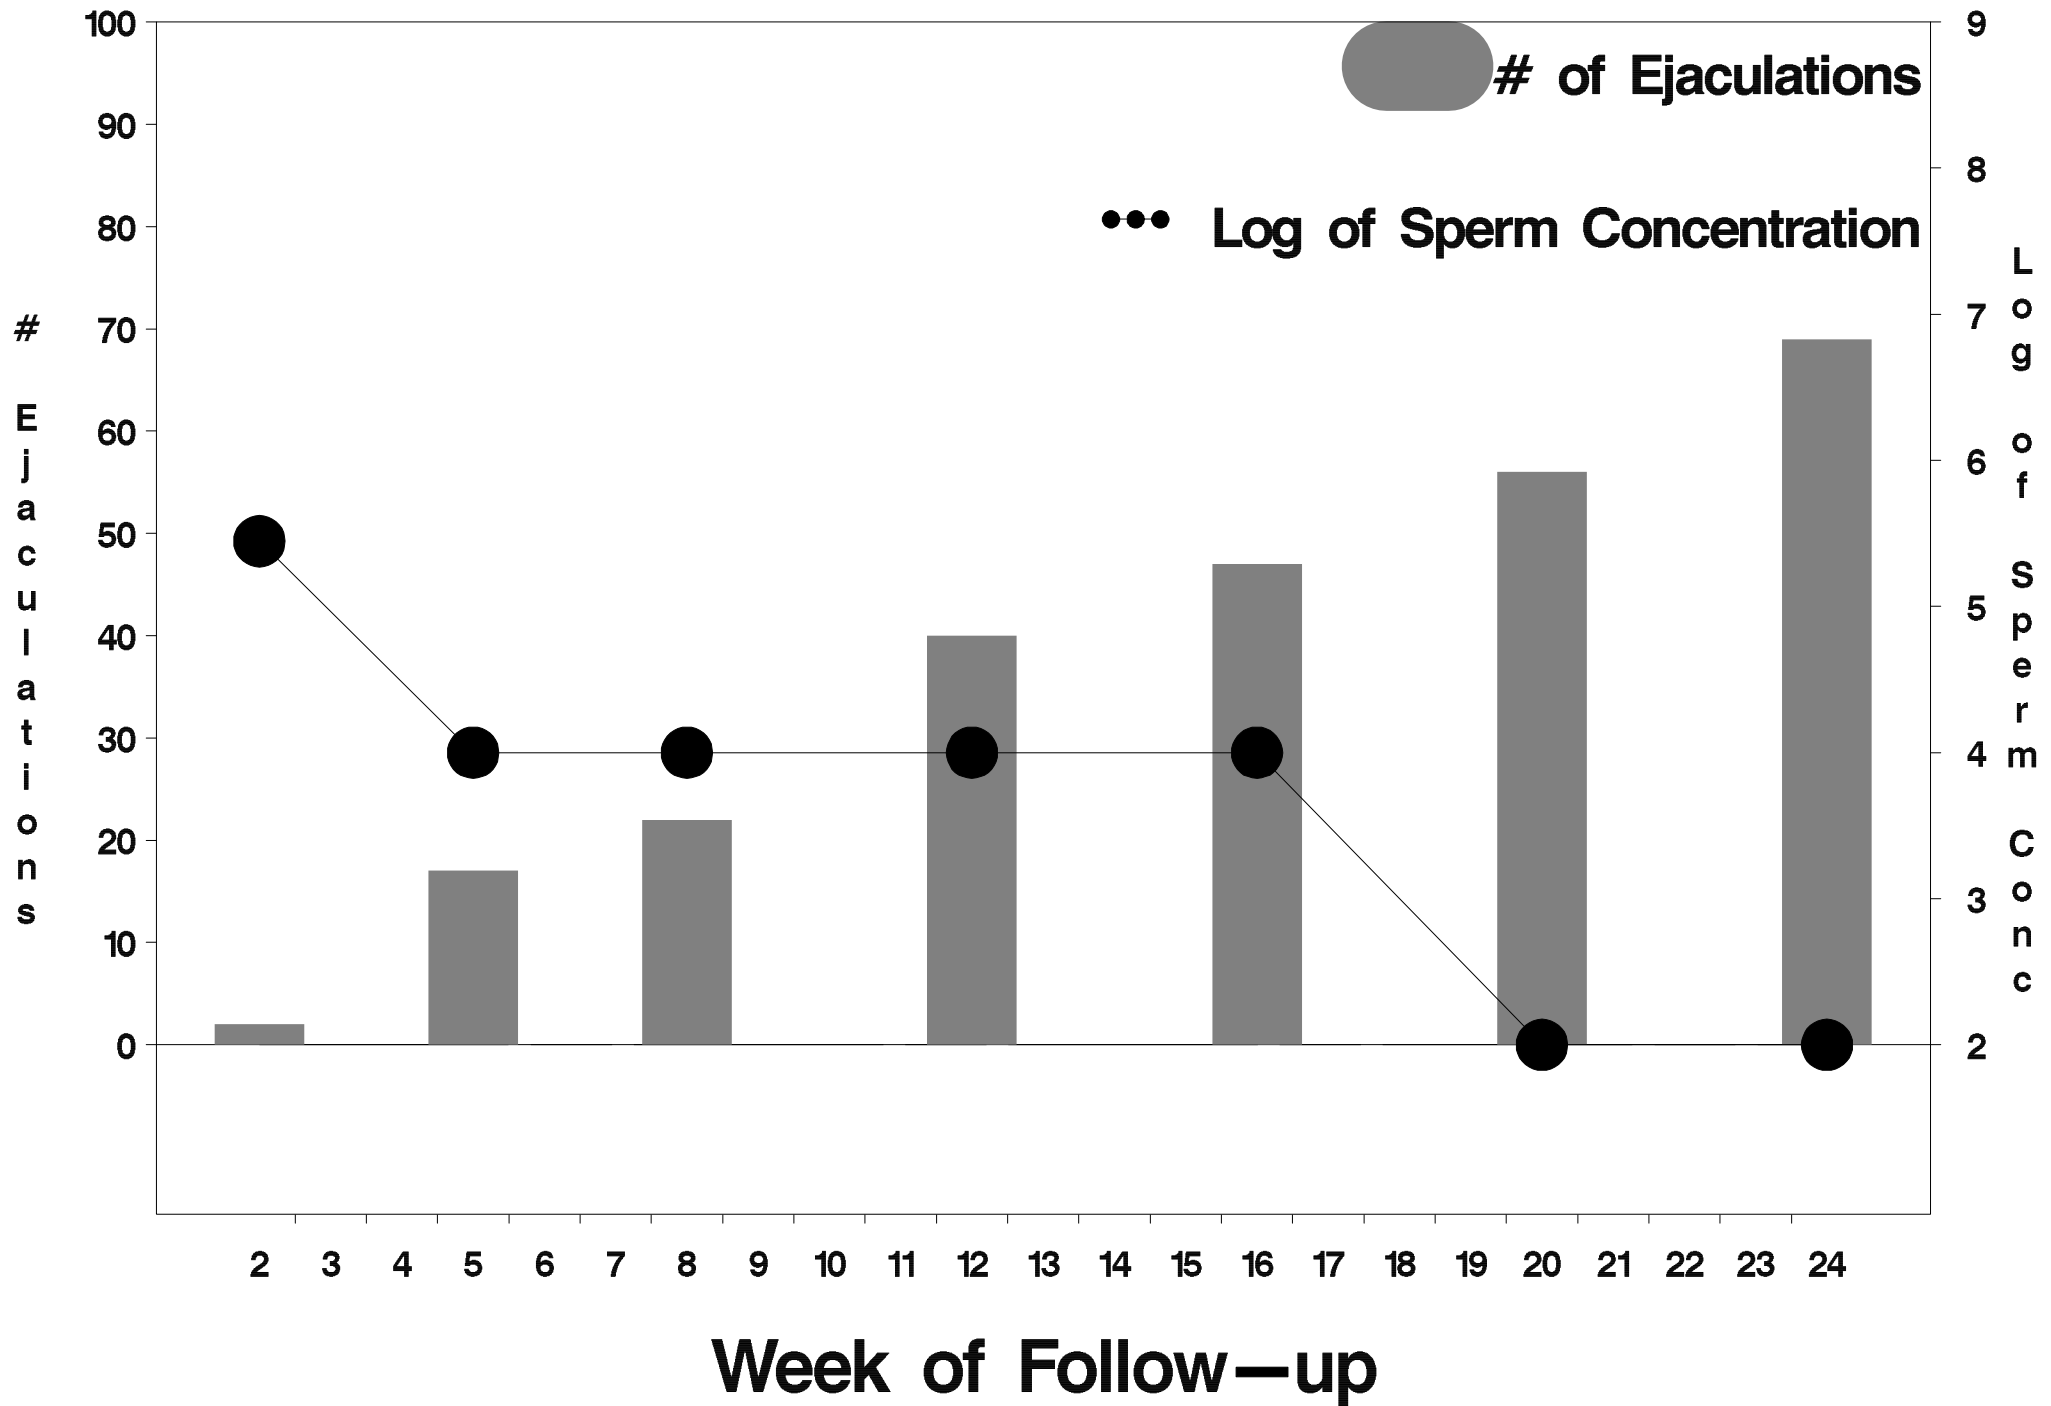



# Participant number= 330

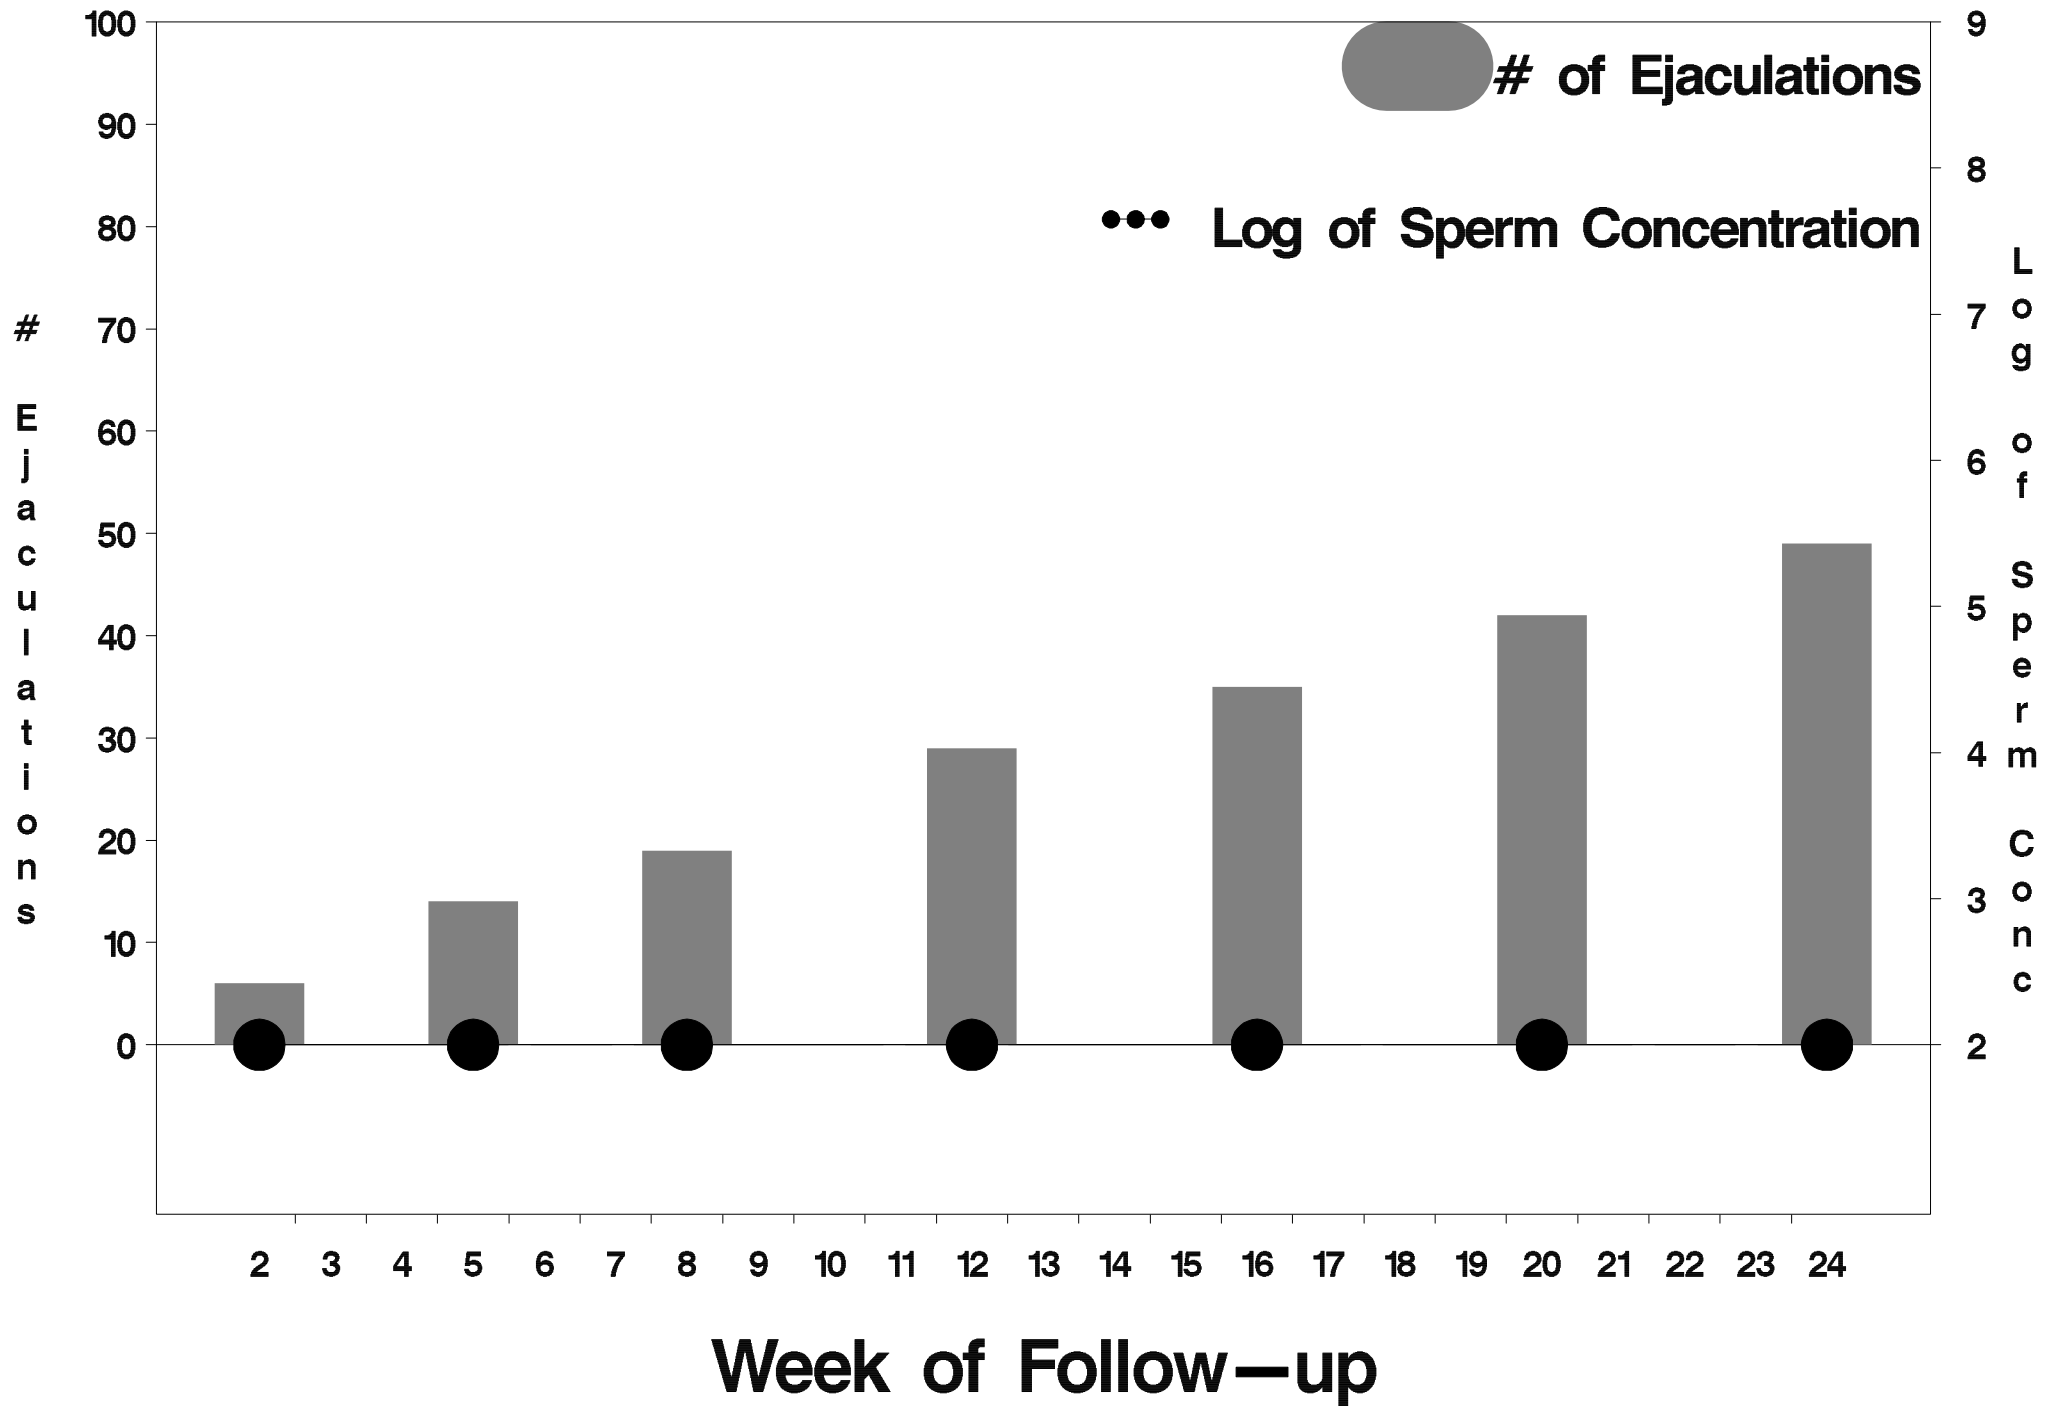

# Participant number= 331

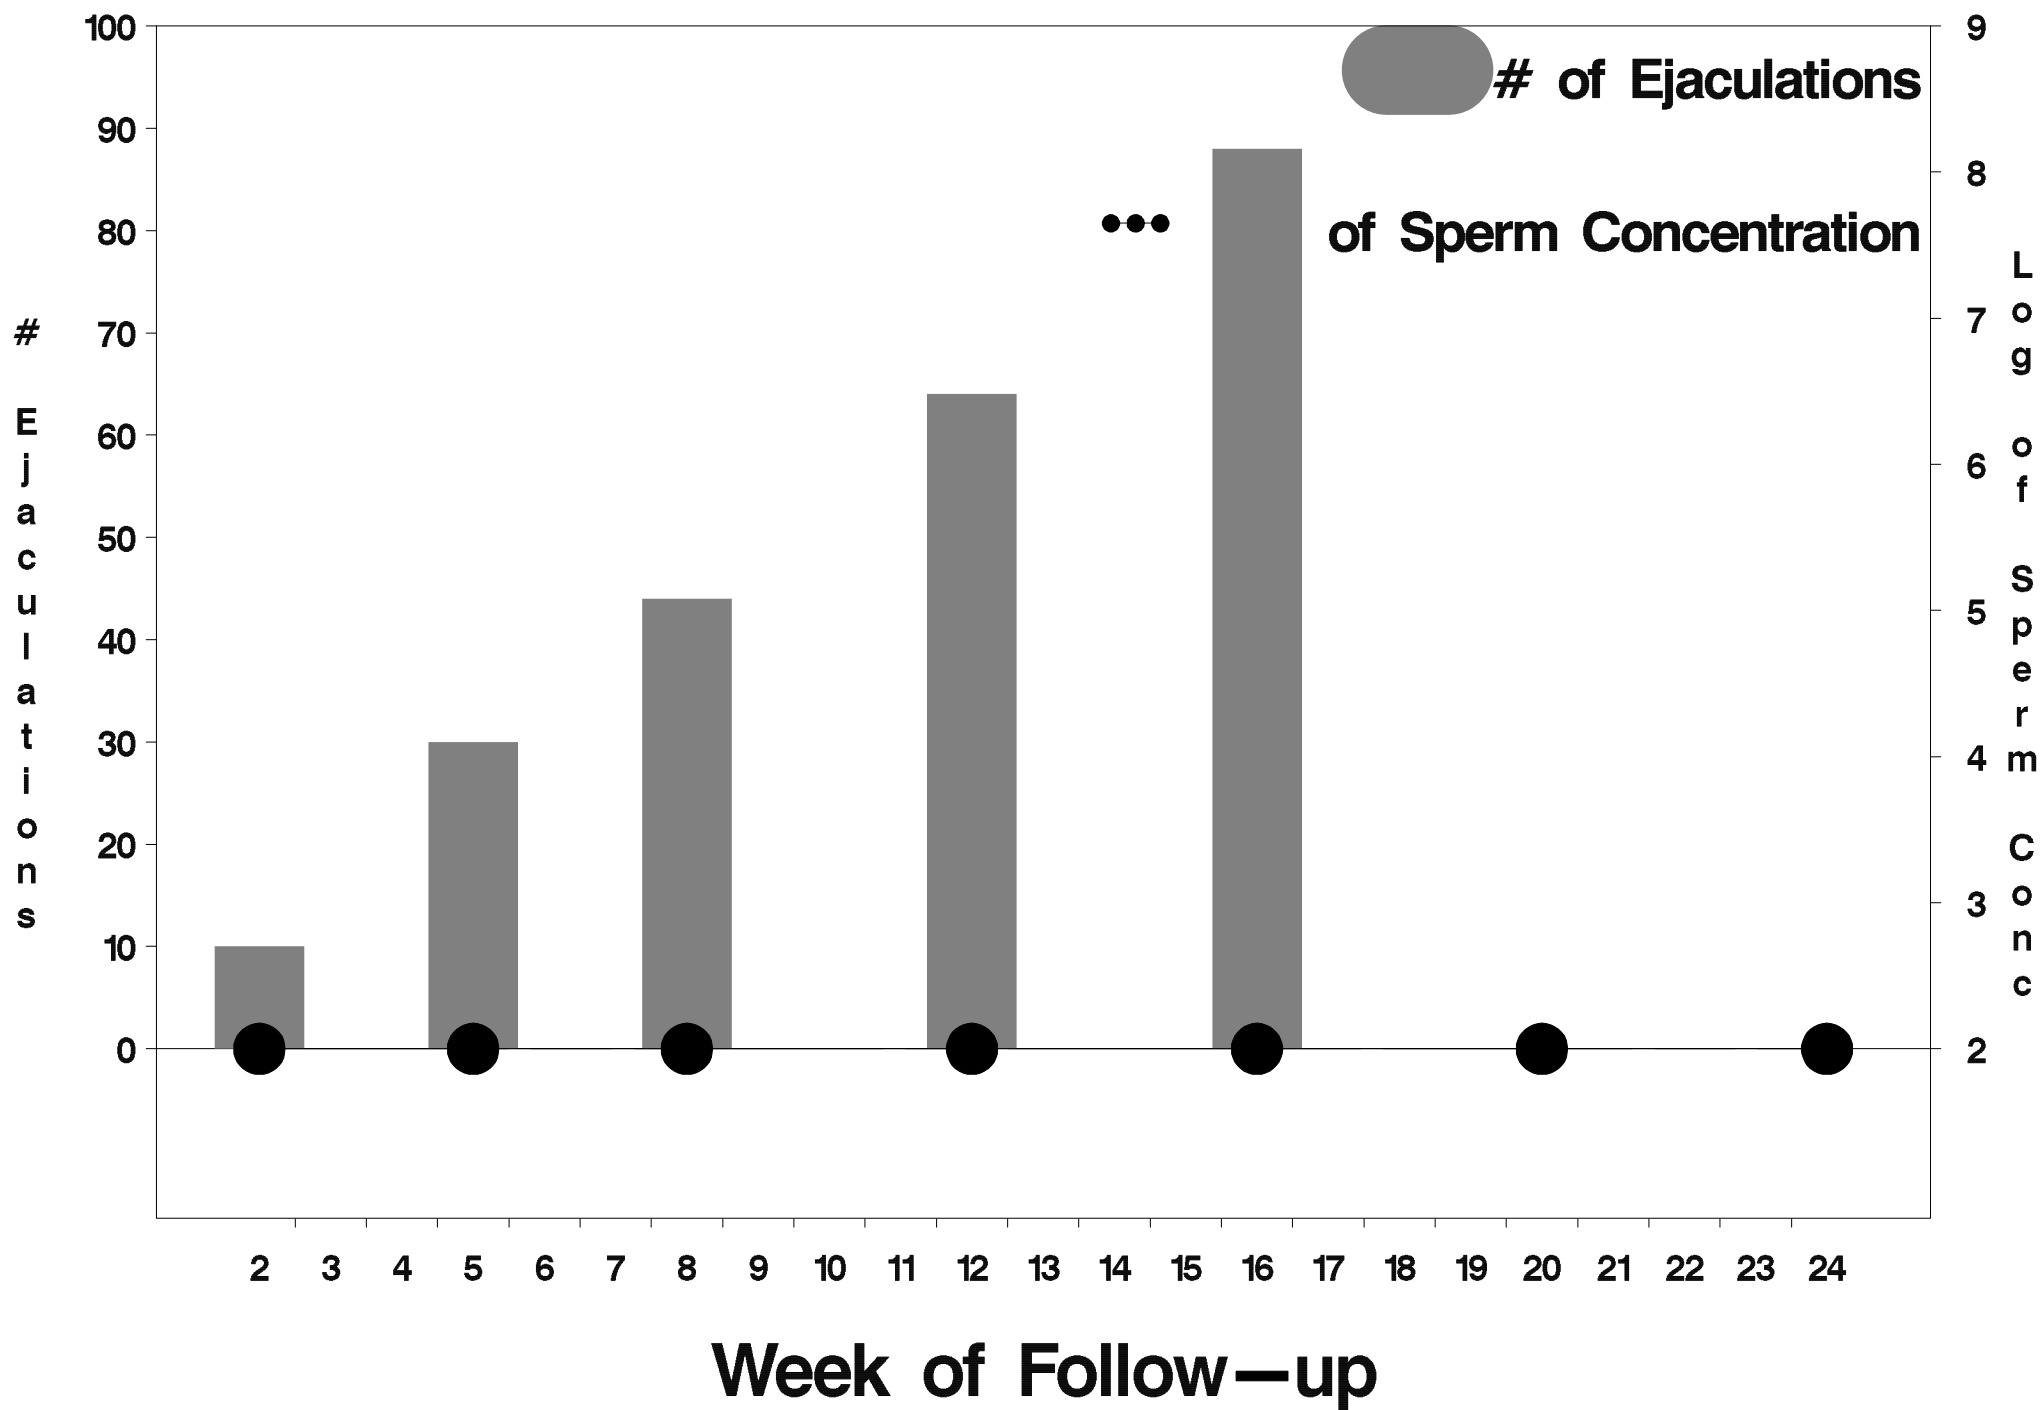

# Participant number= 332

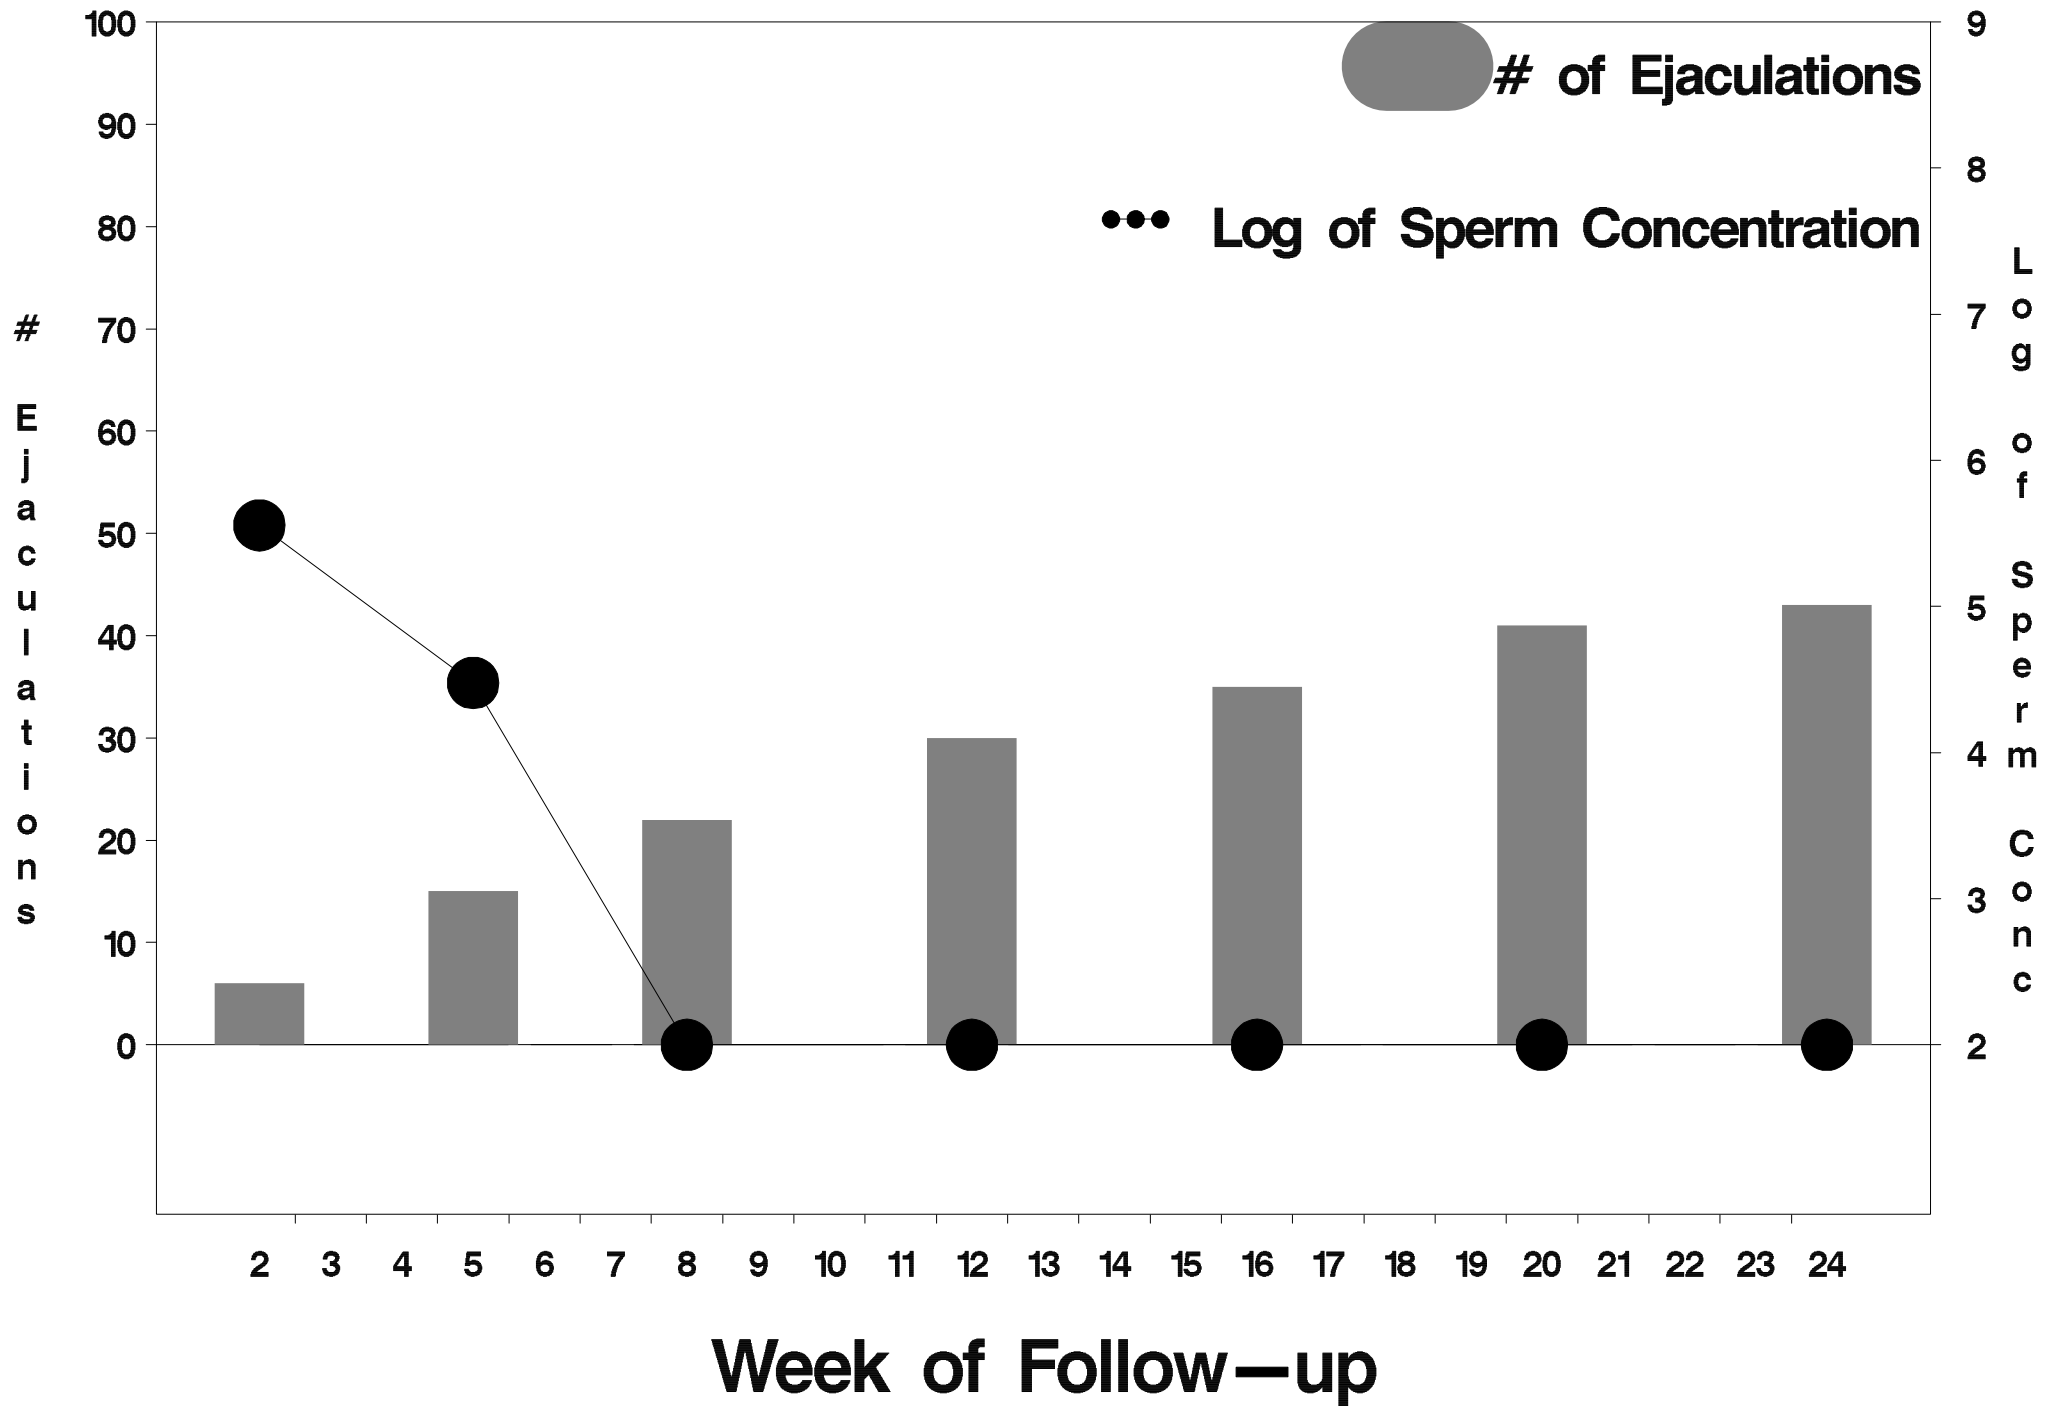



# Participant number= 334

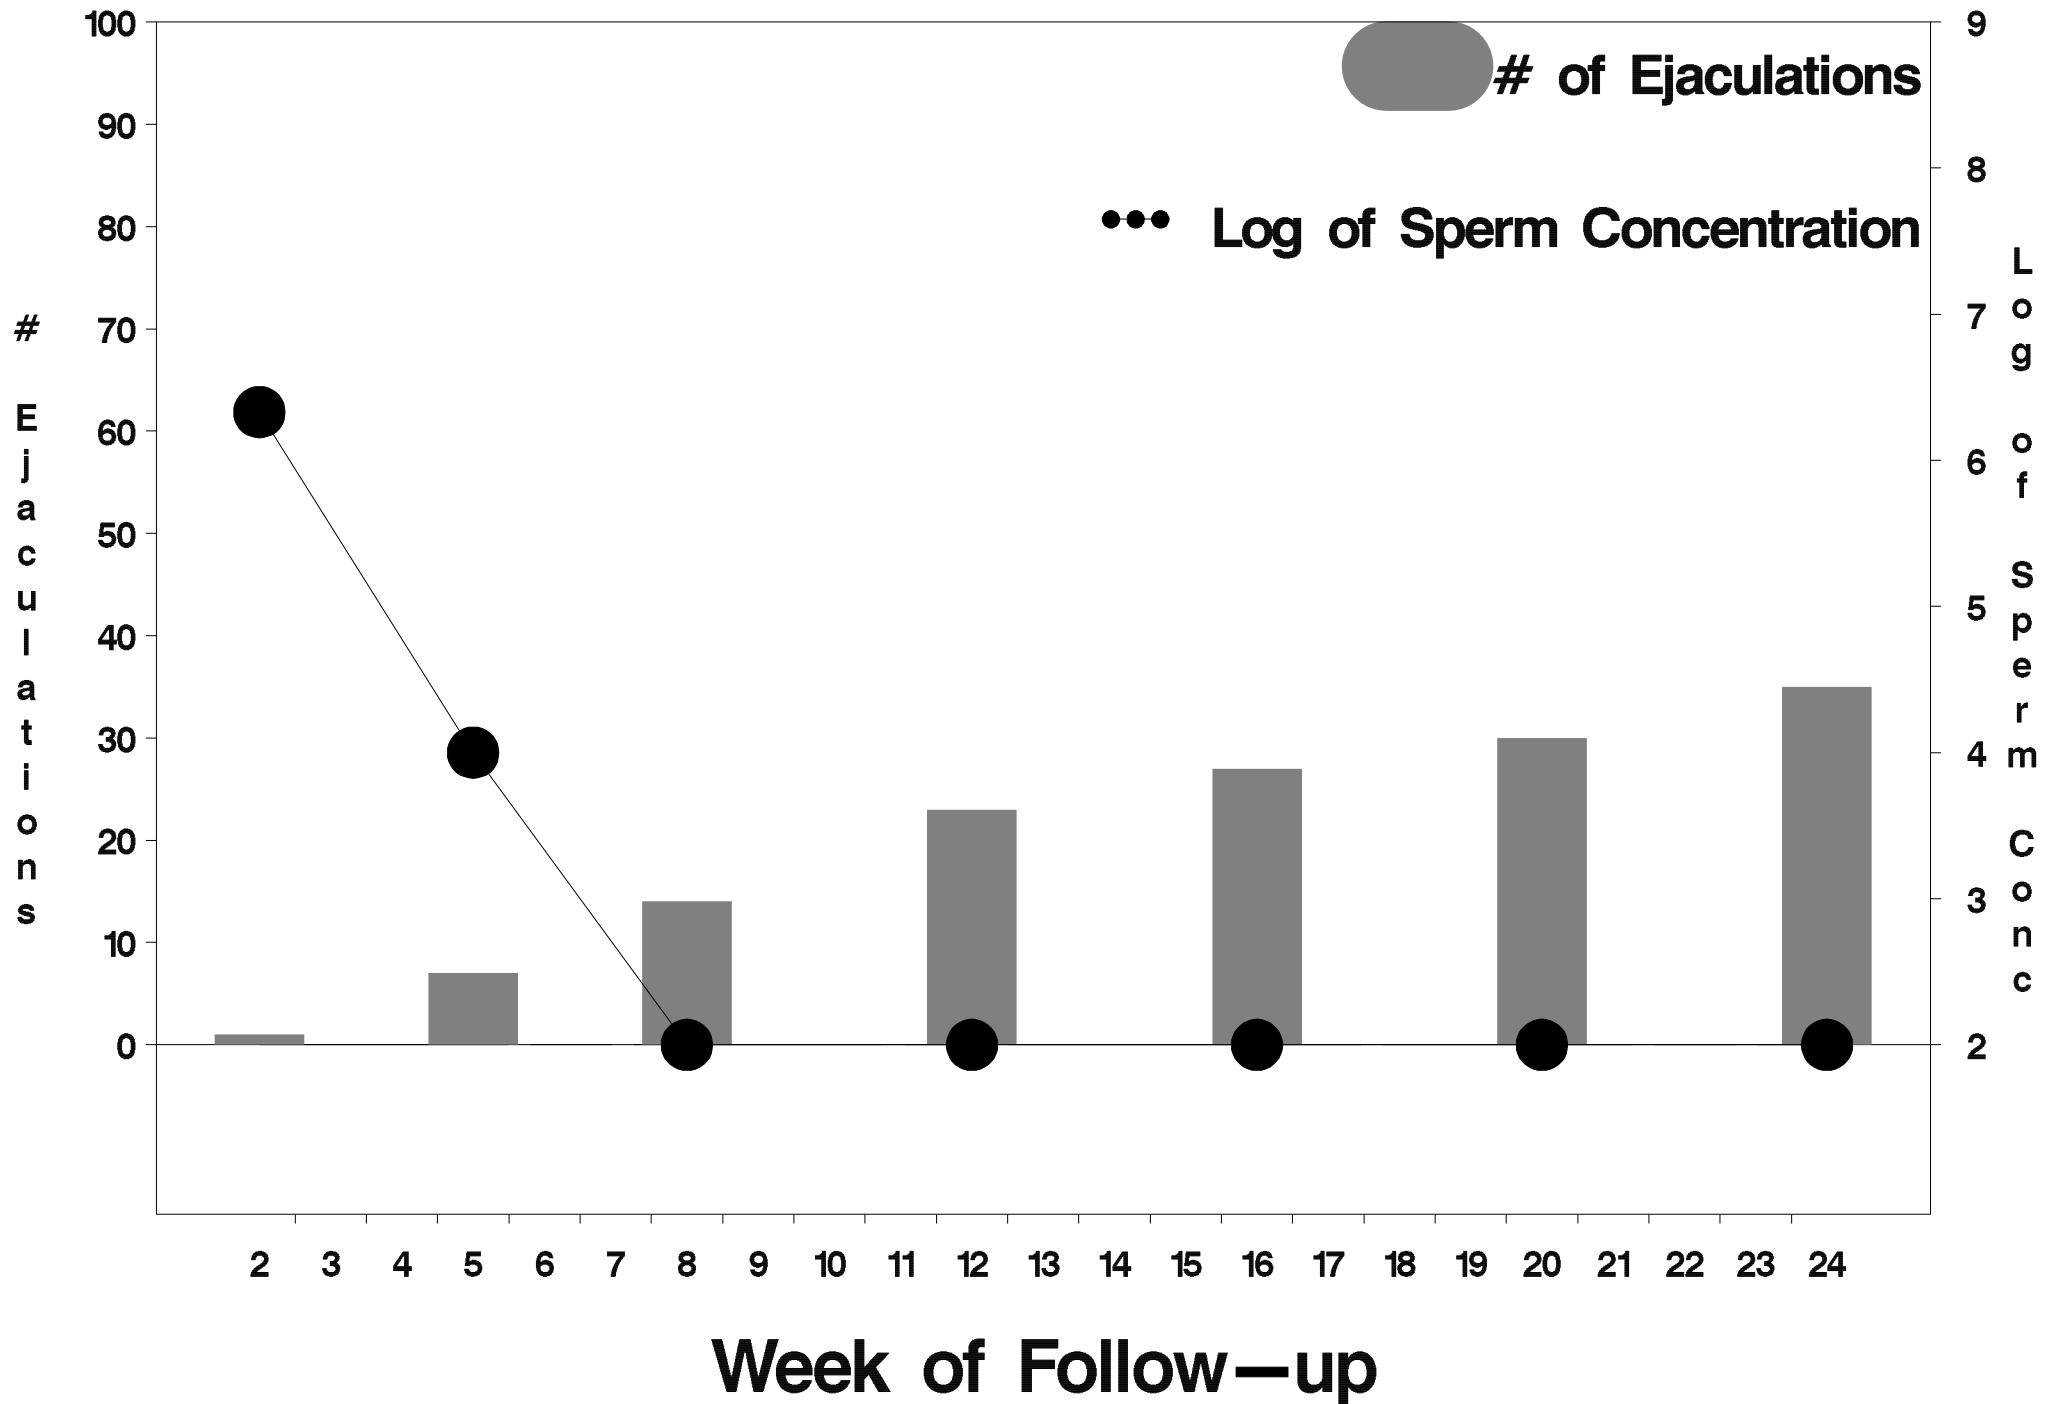

# Participant number= 335

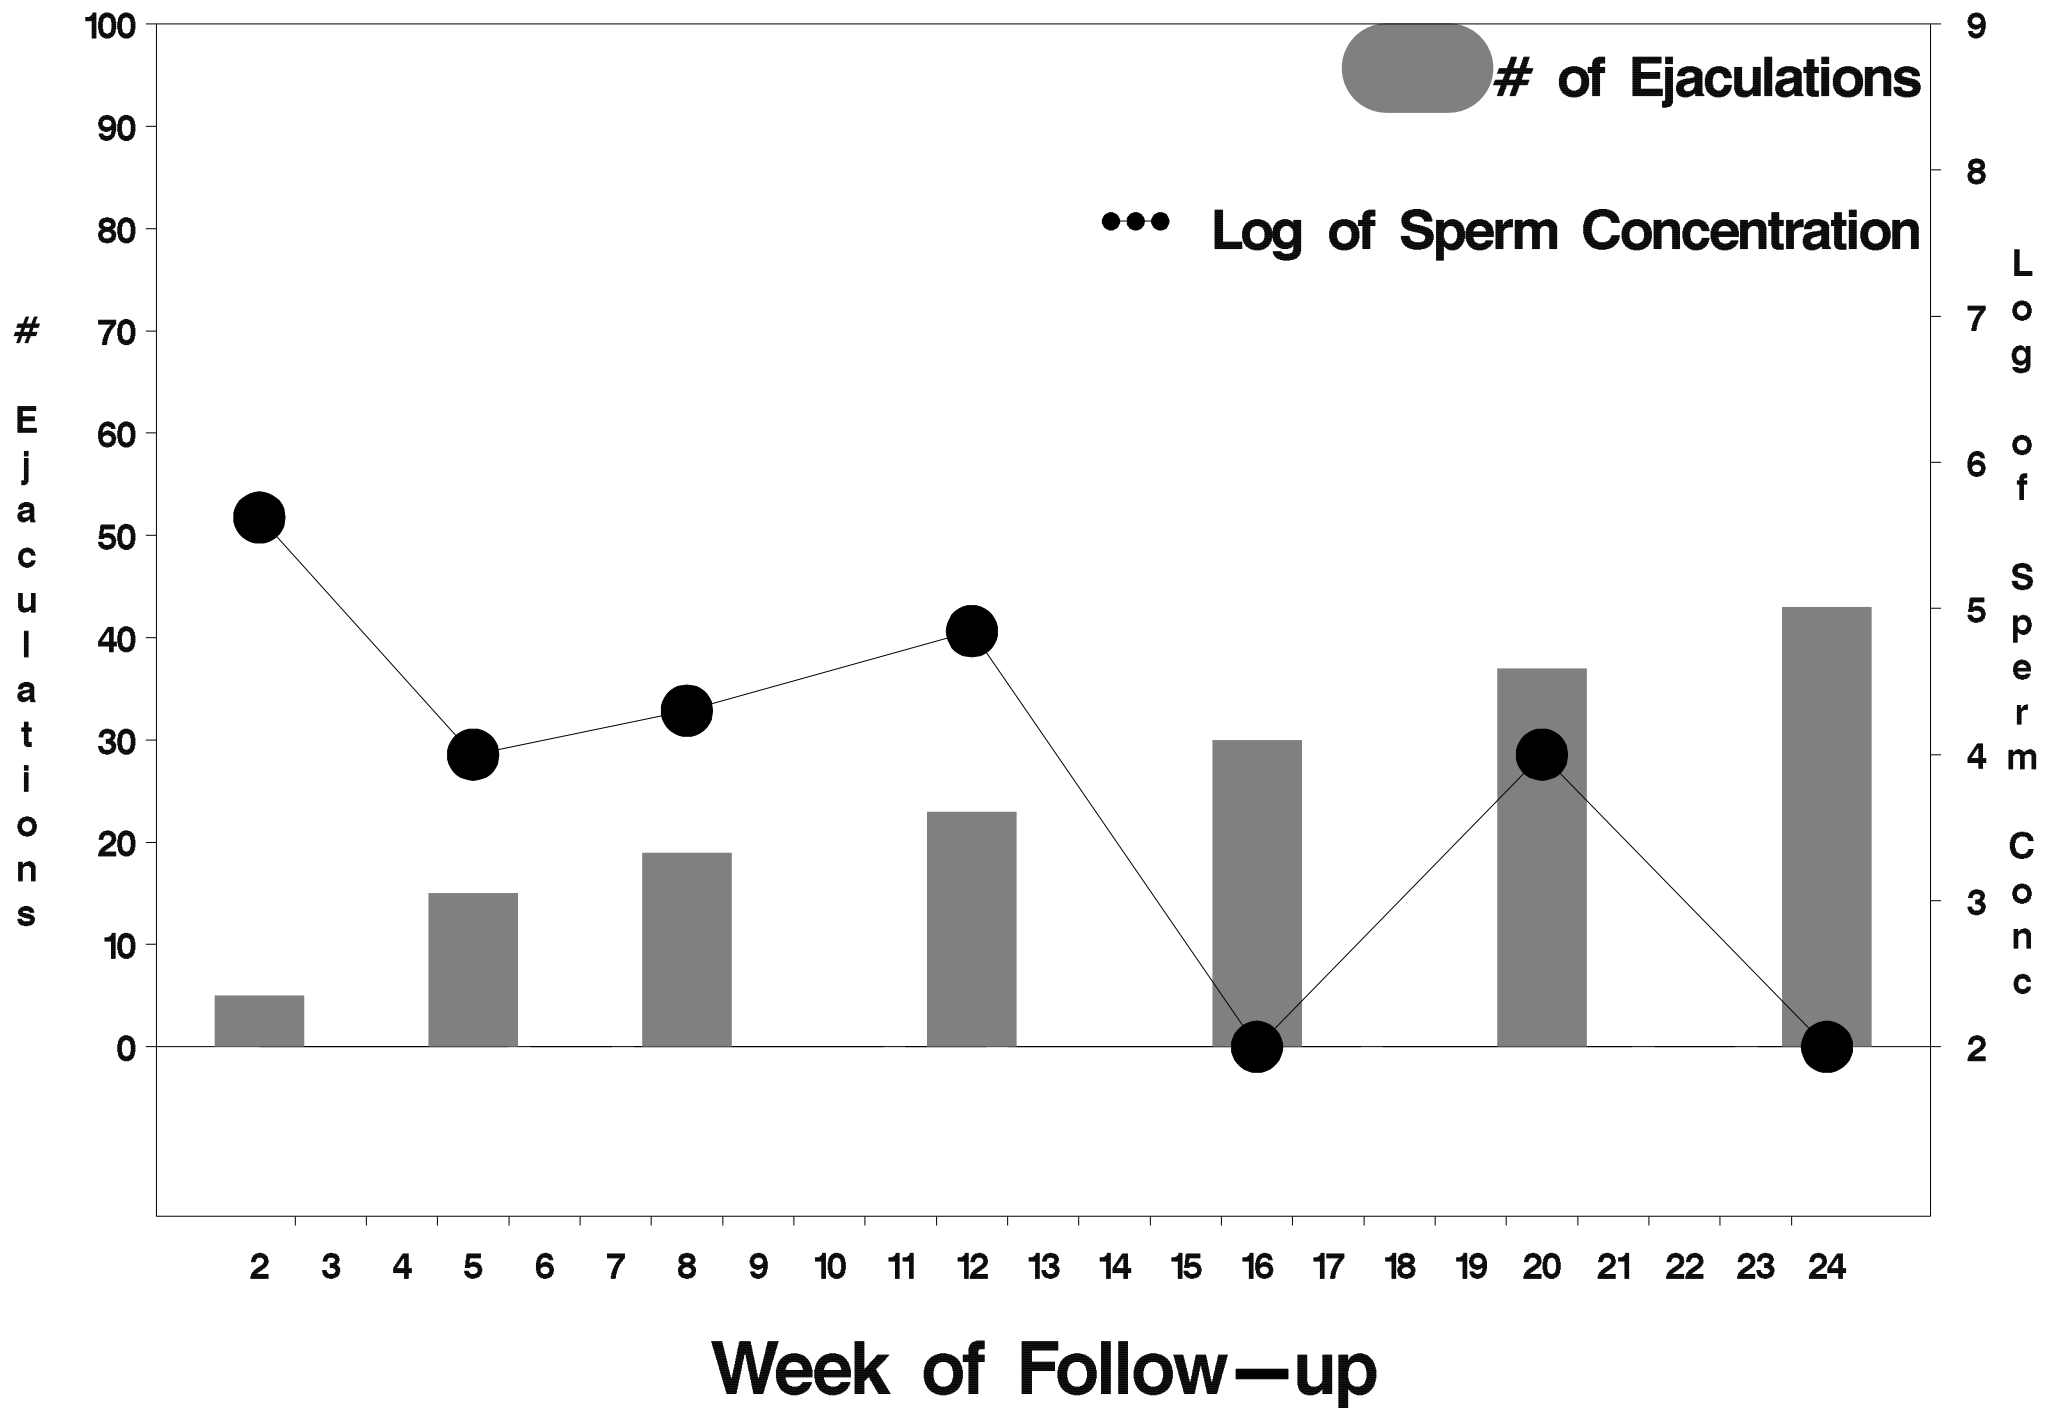

# Participant number= 336

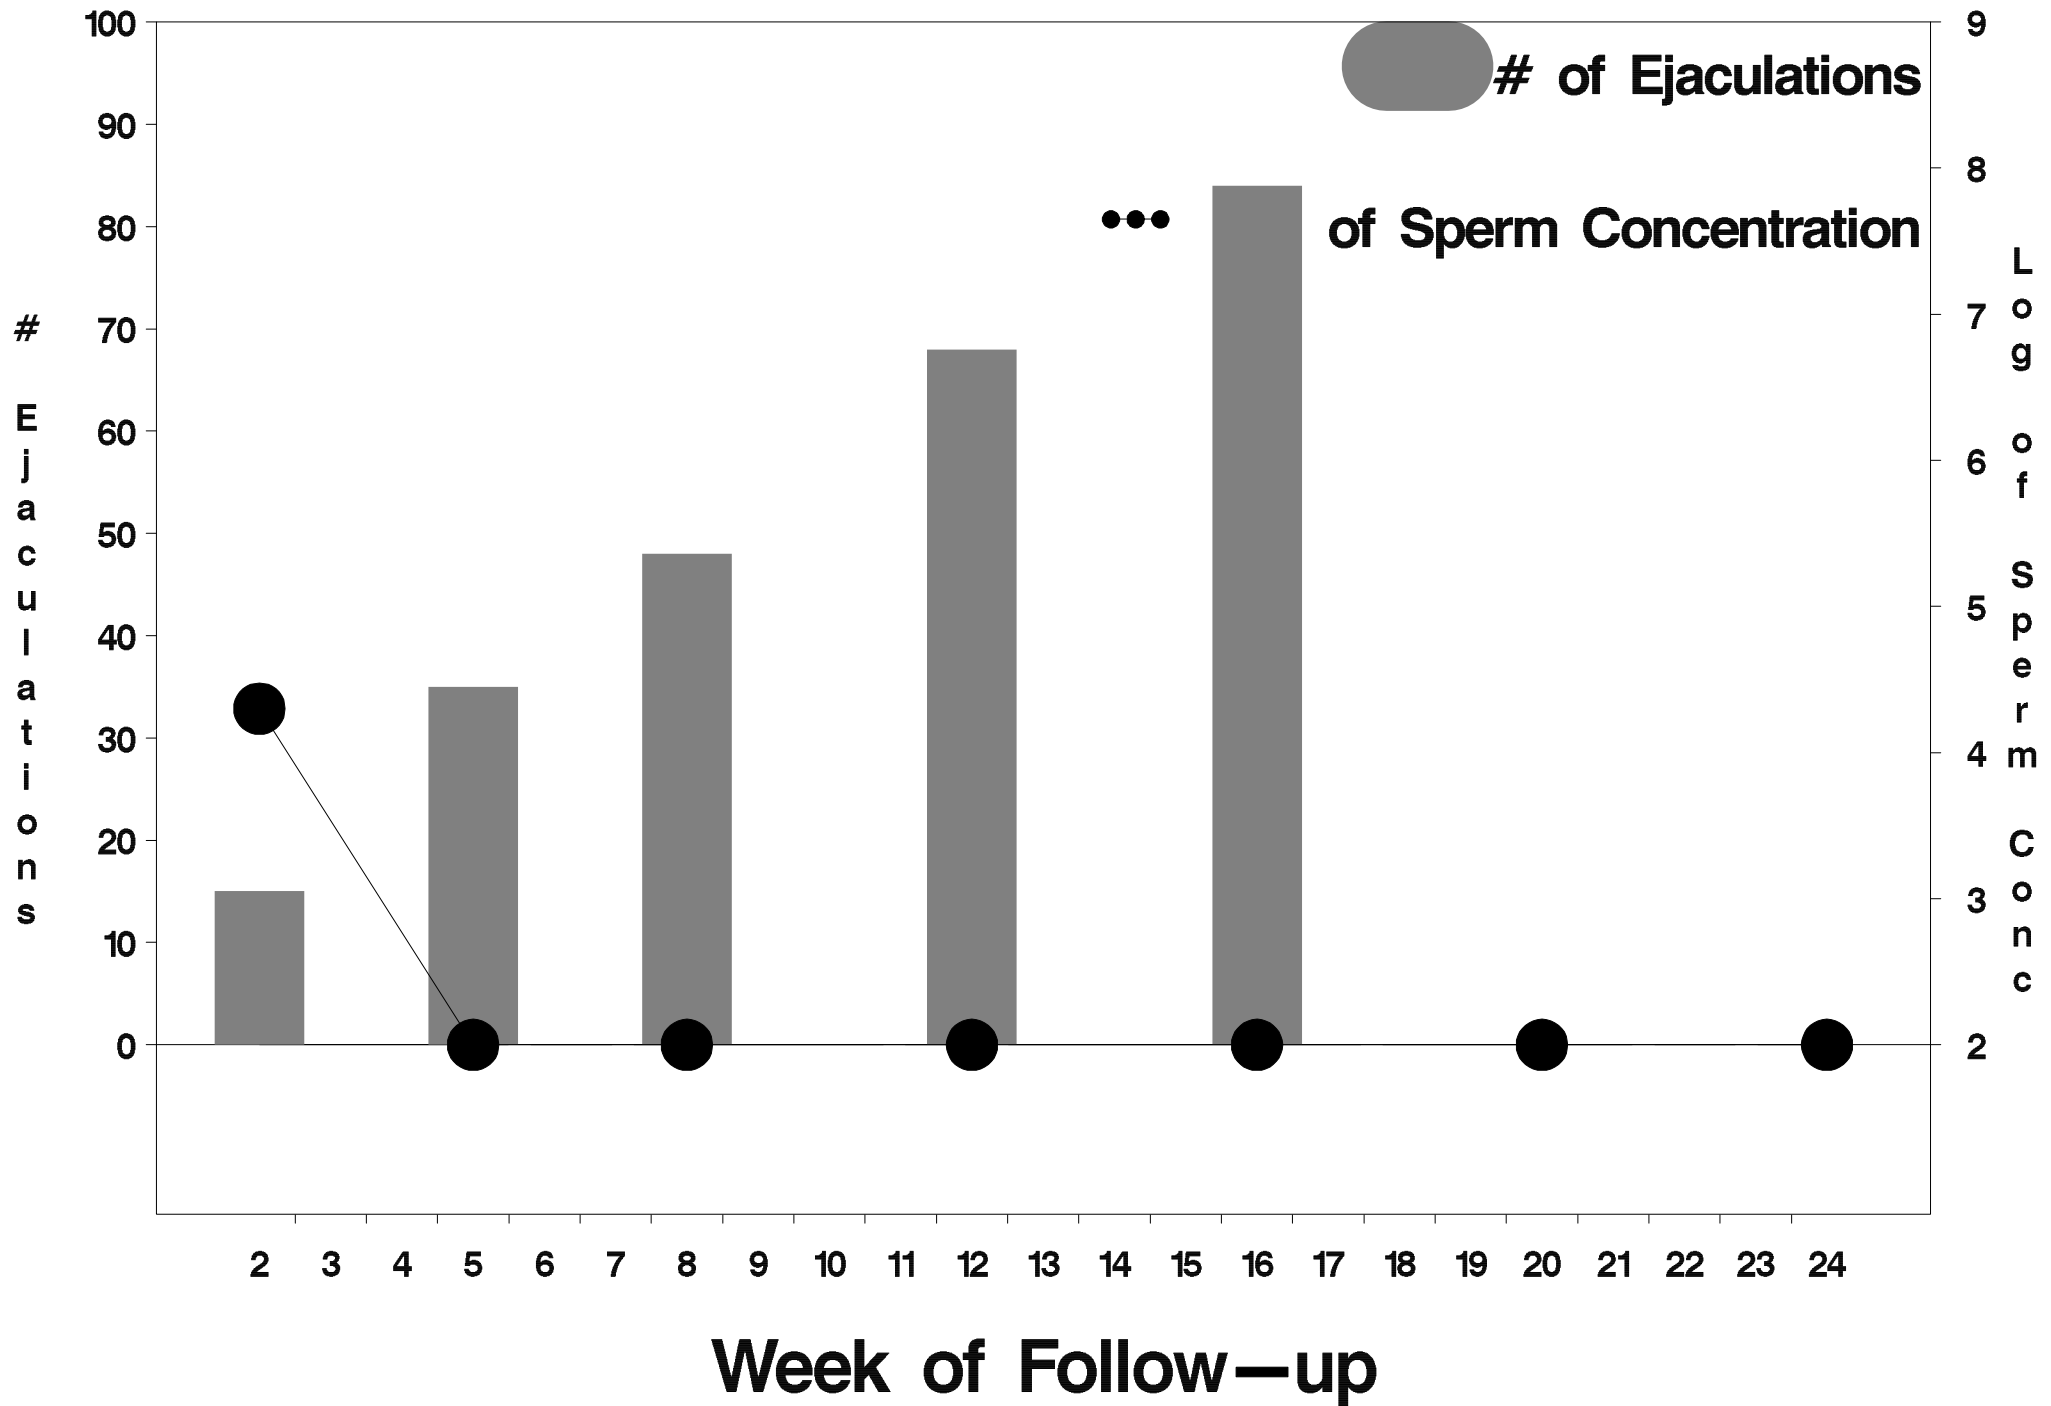

# Participant number= 337

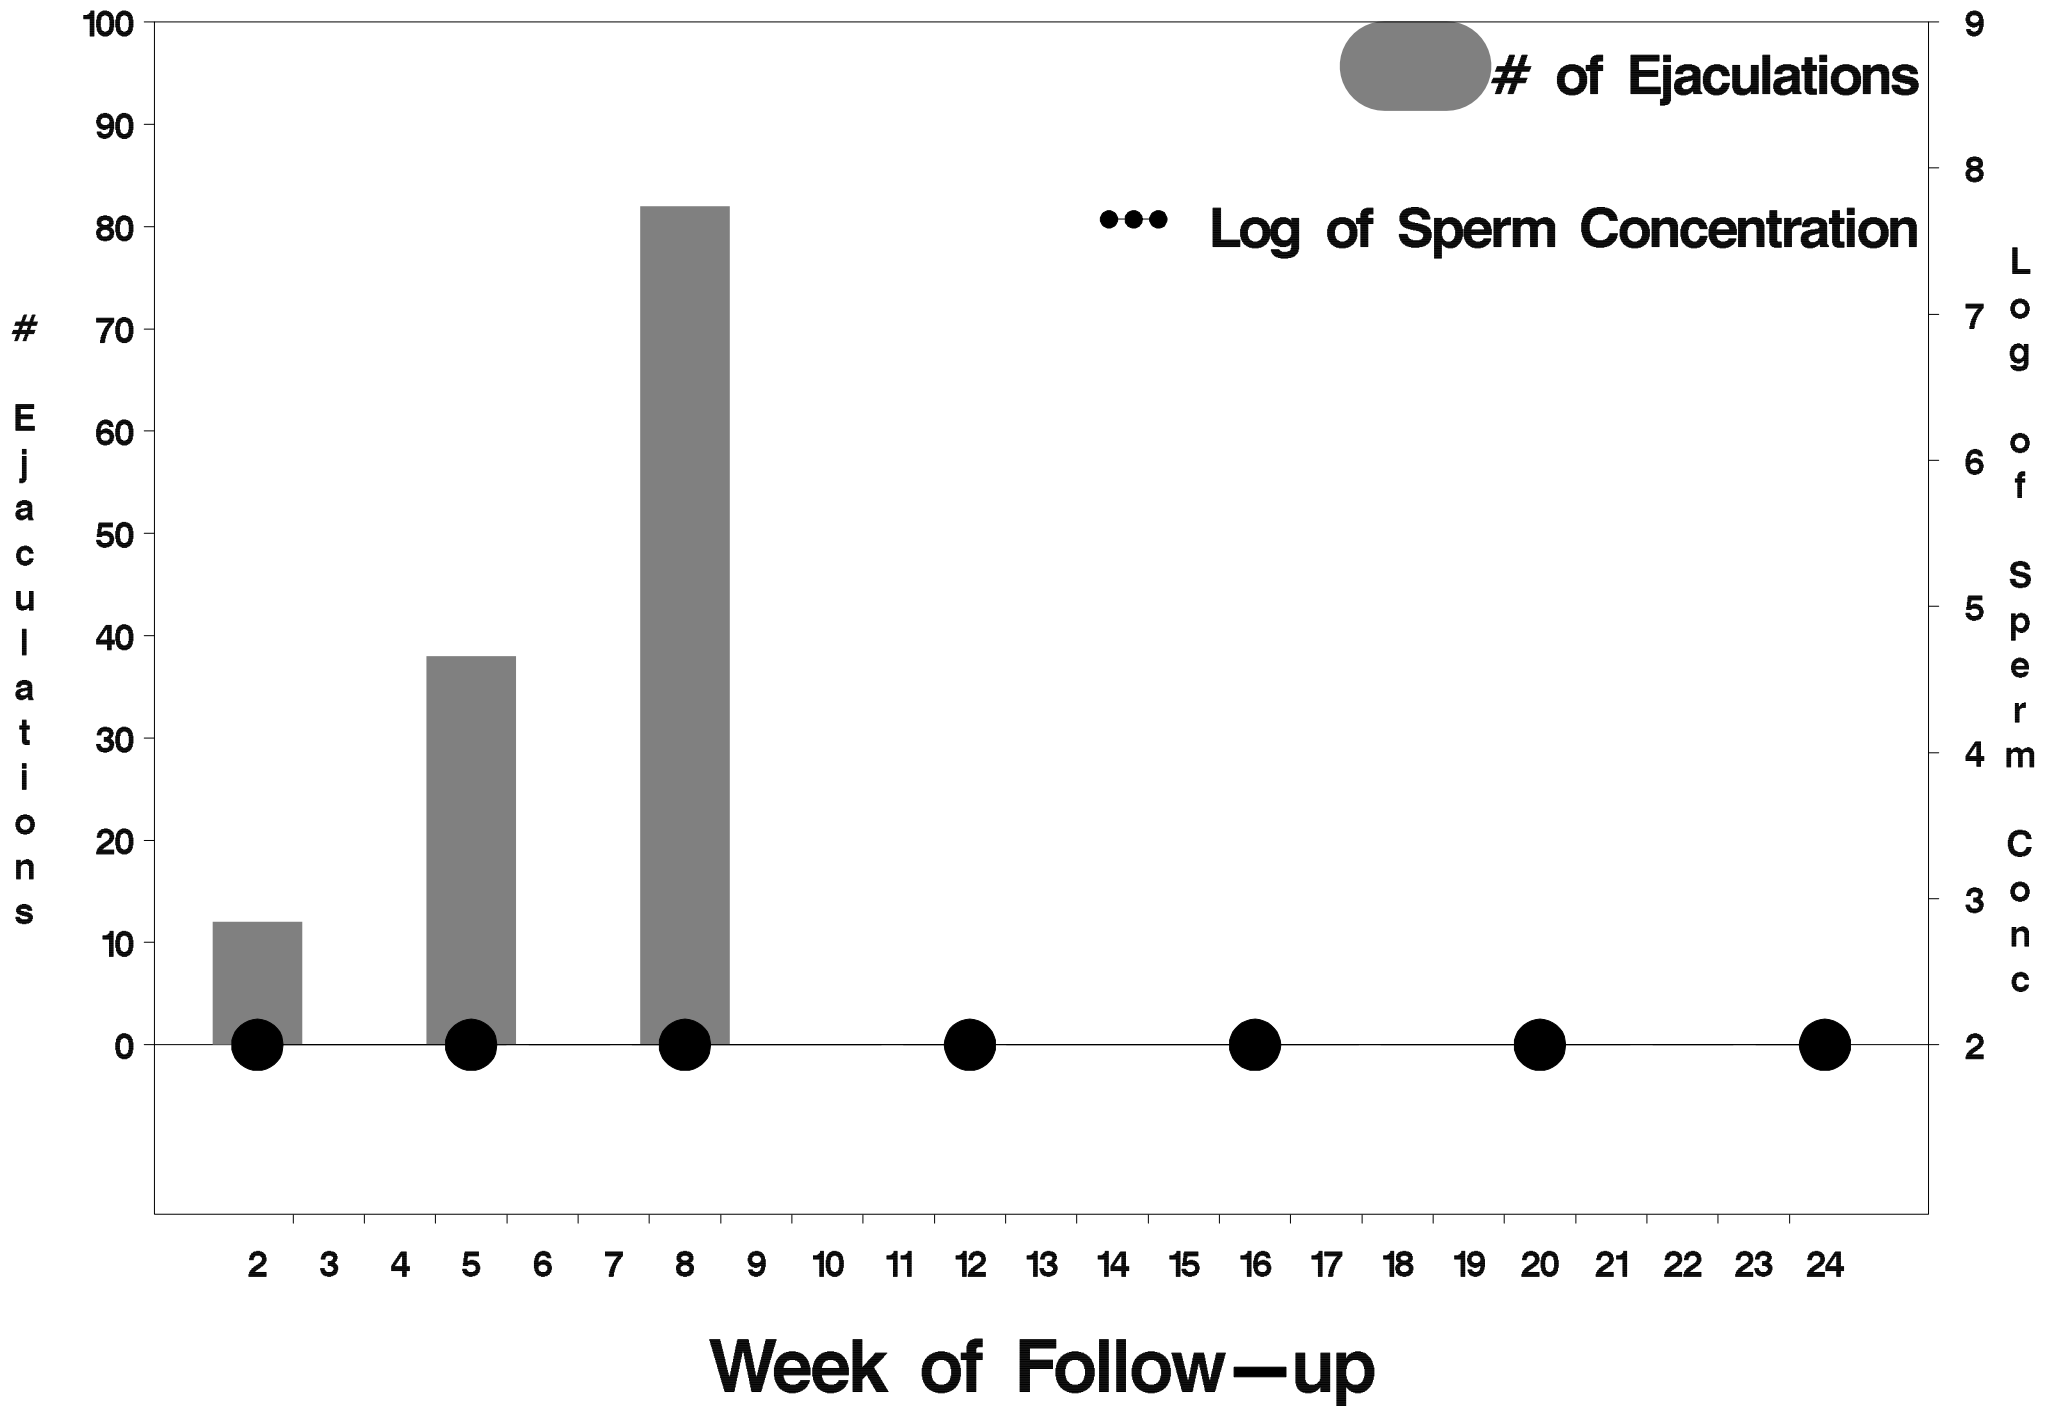



# Participant number= 338

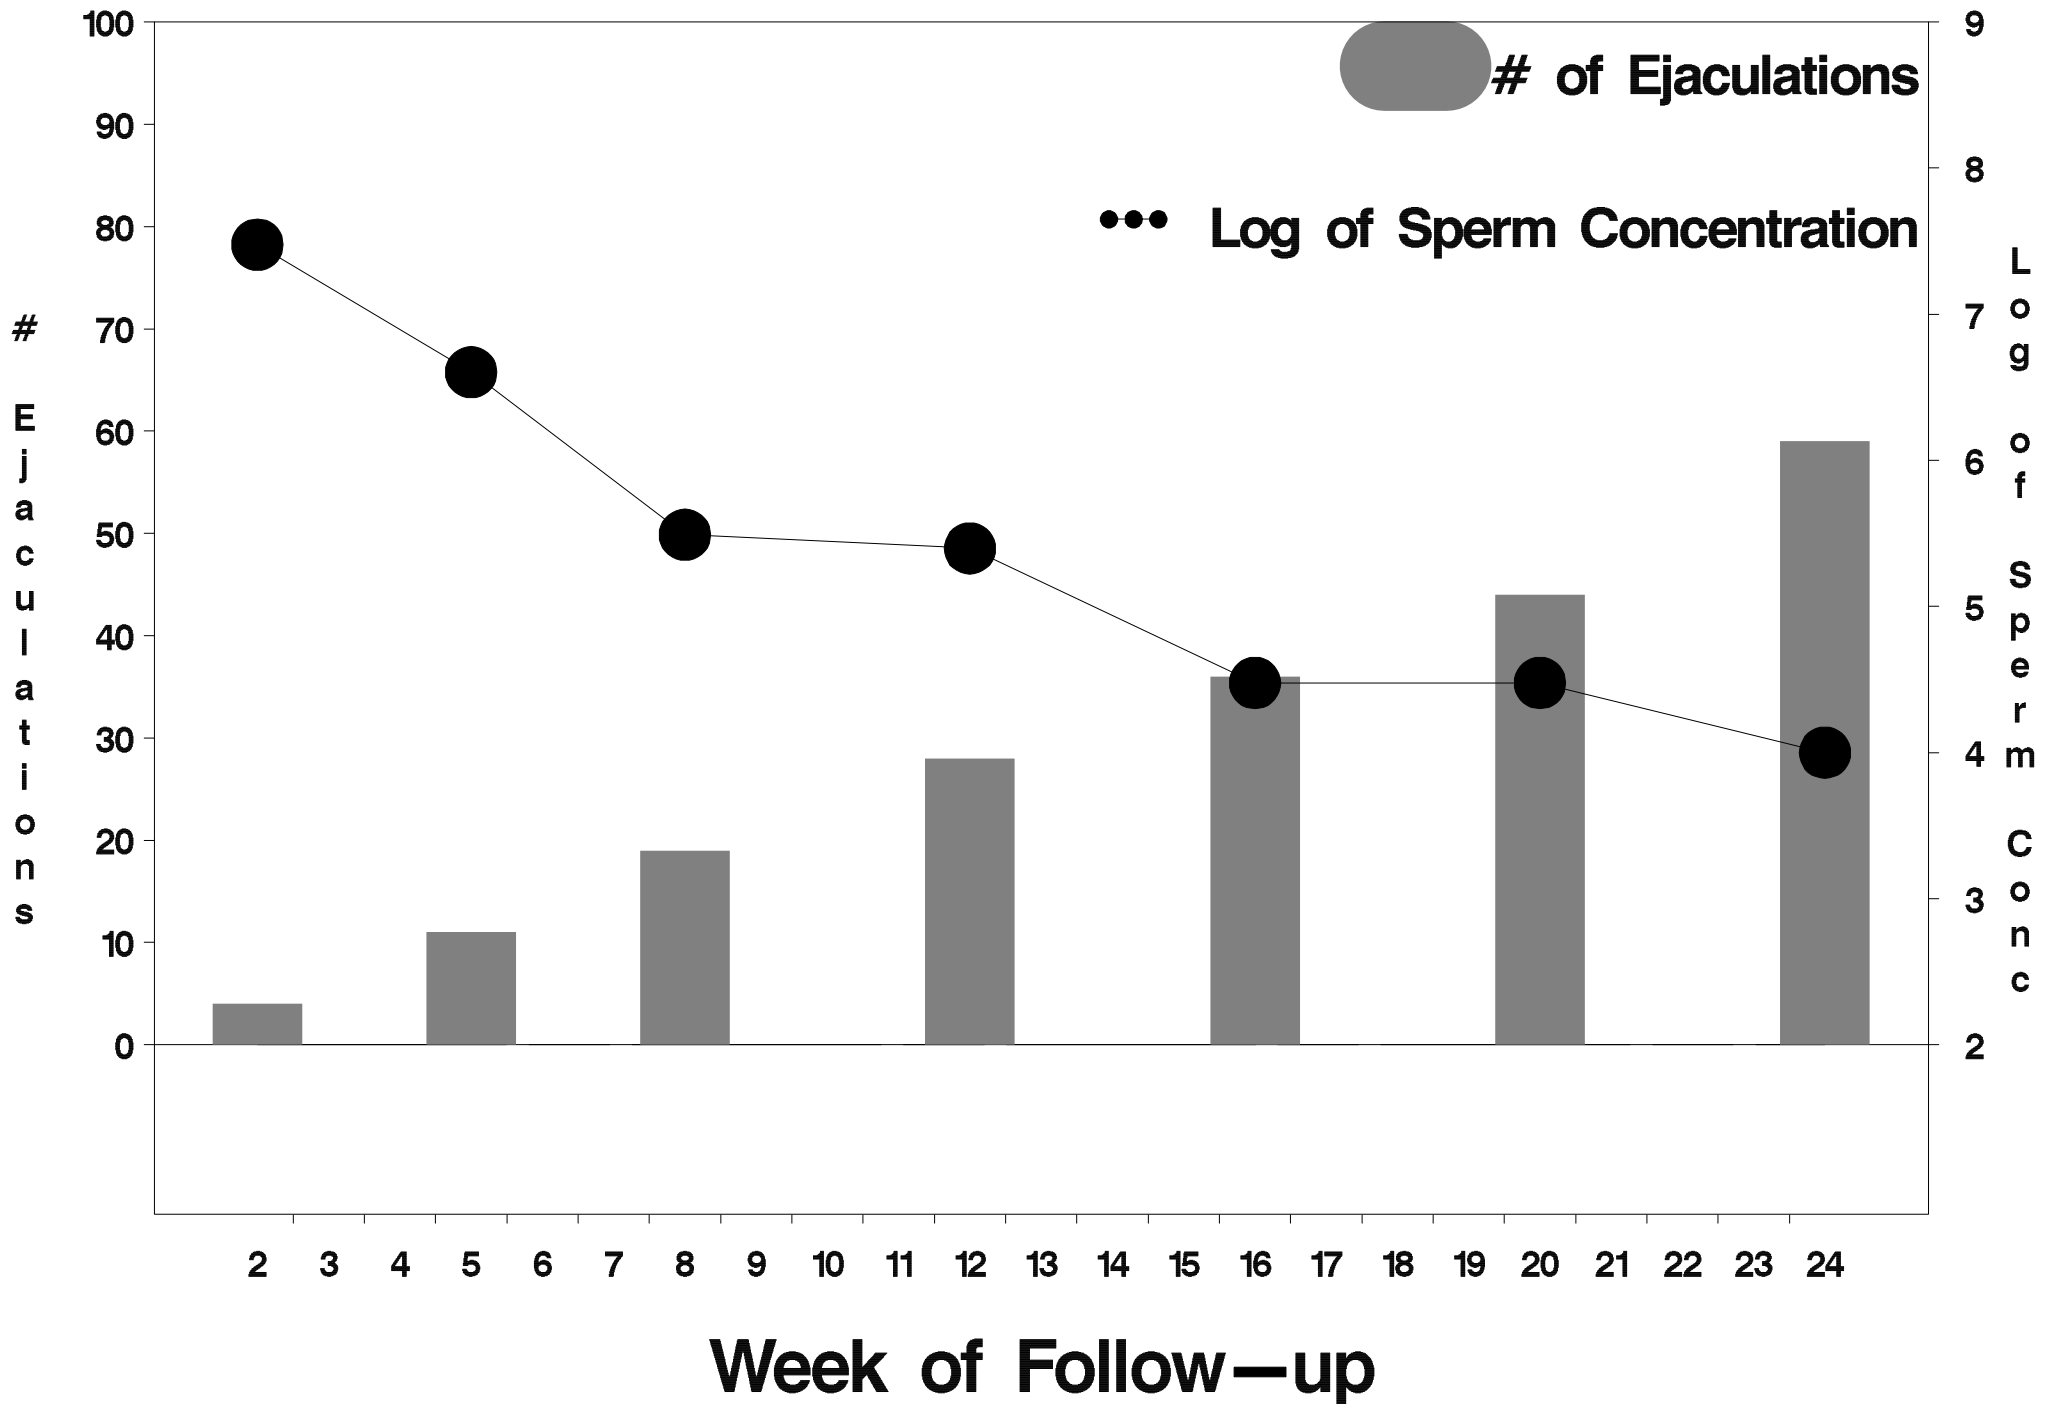

# Participant number= 339

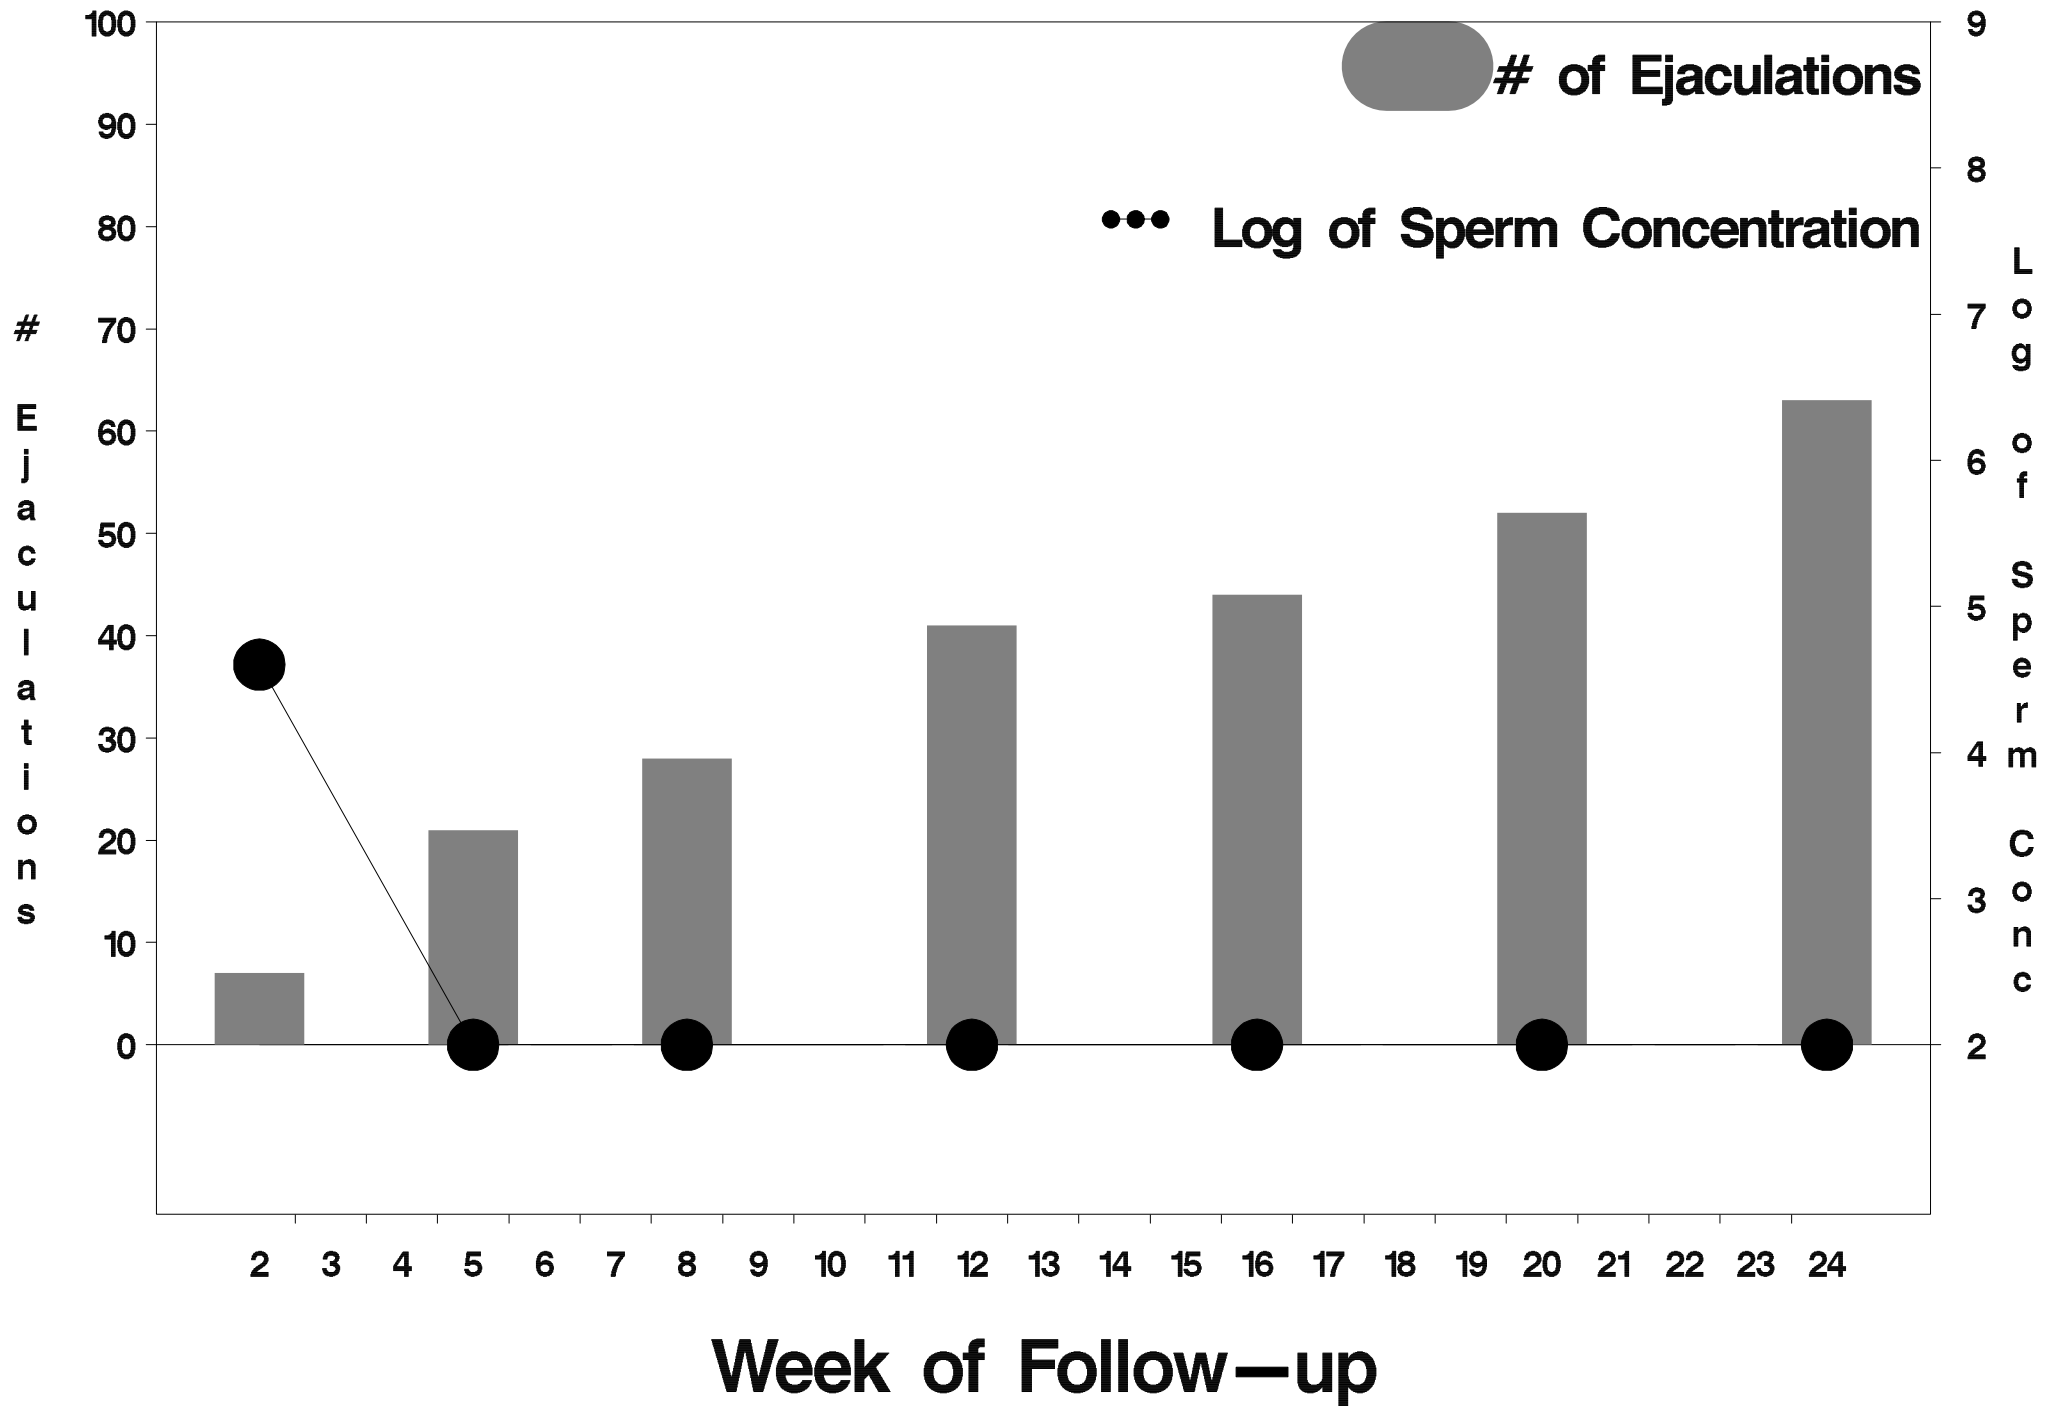

# Participant number= 340

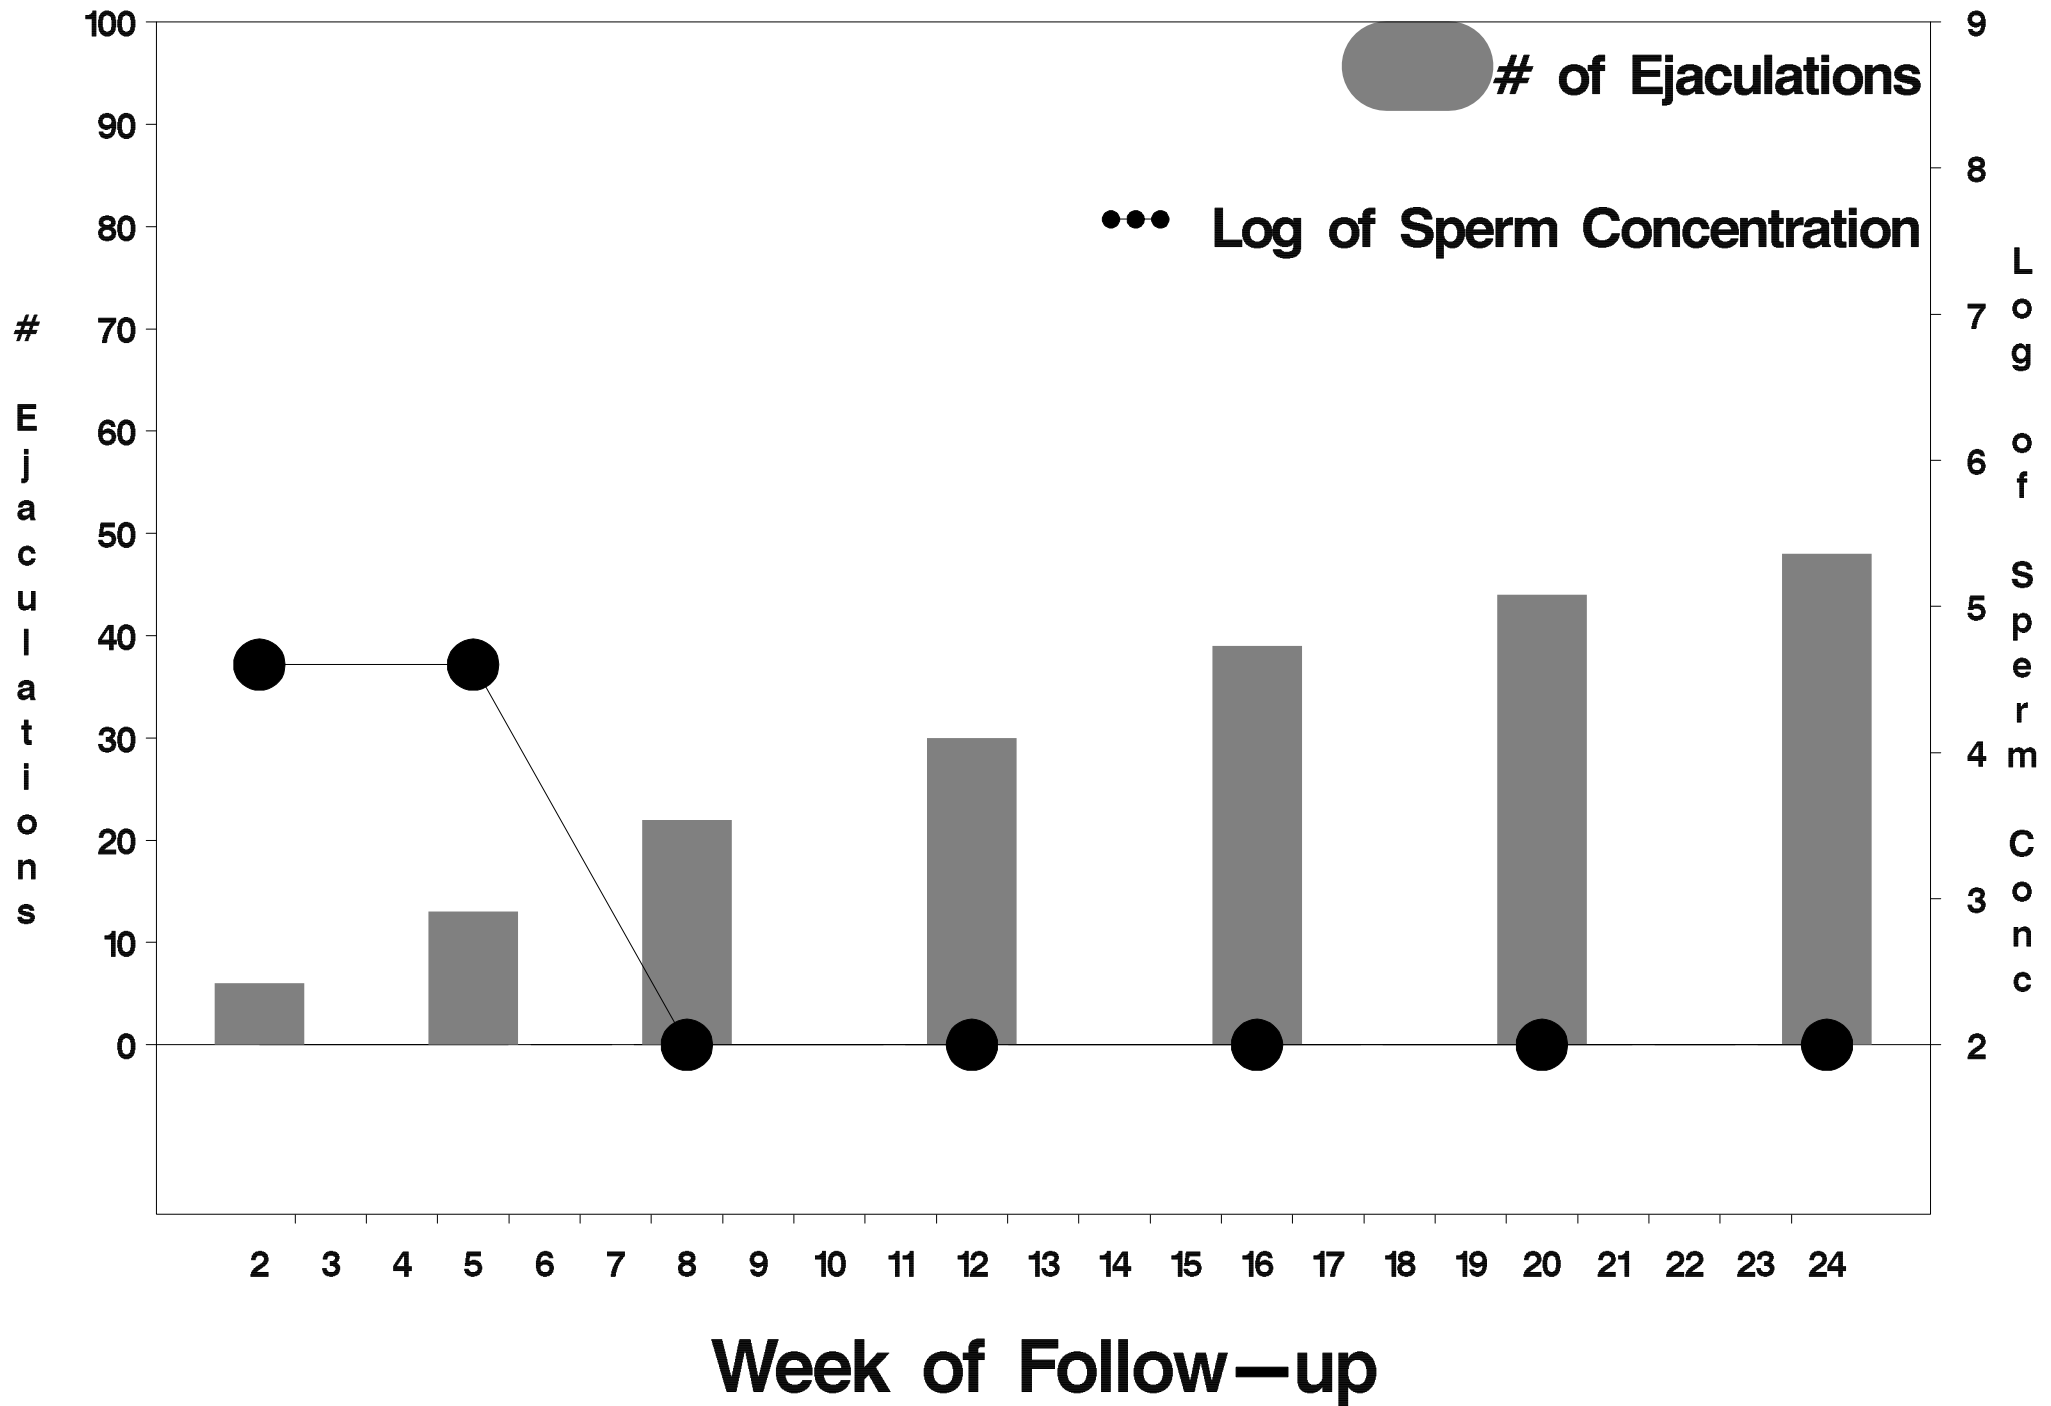

# Participant number= 341

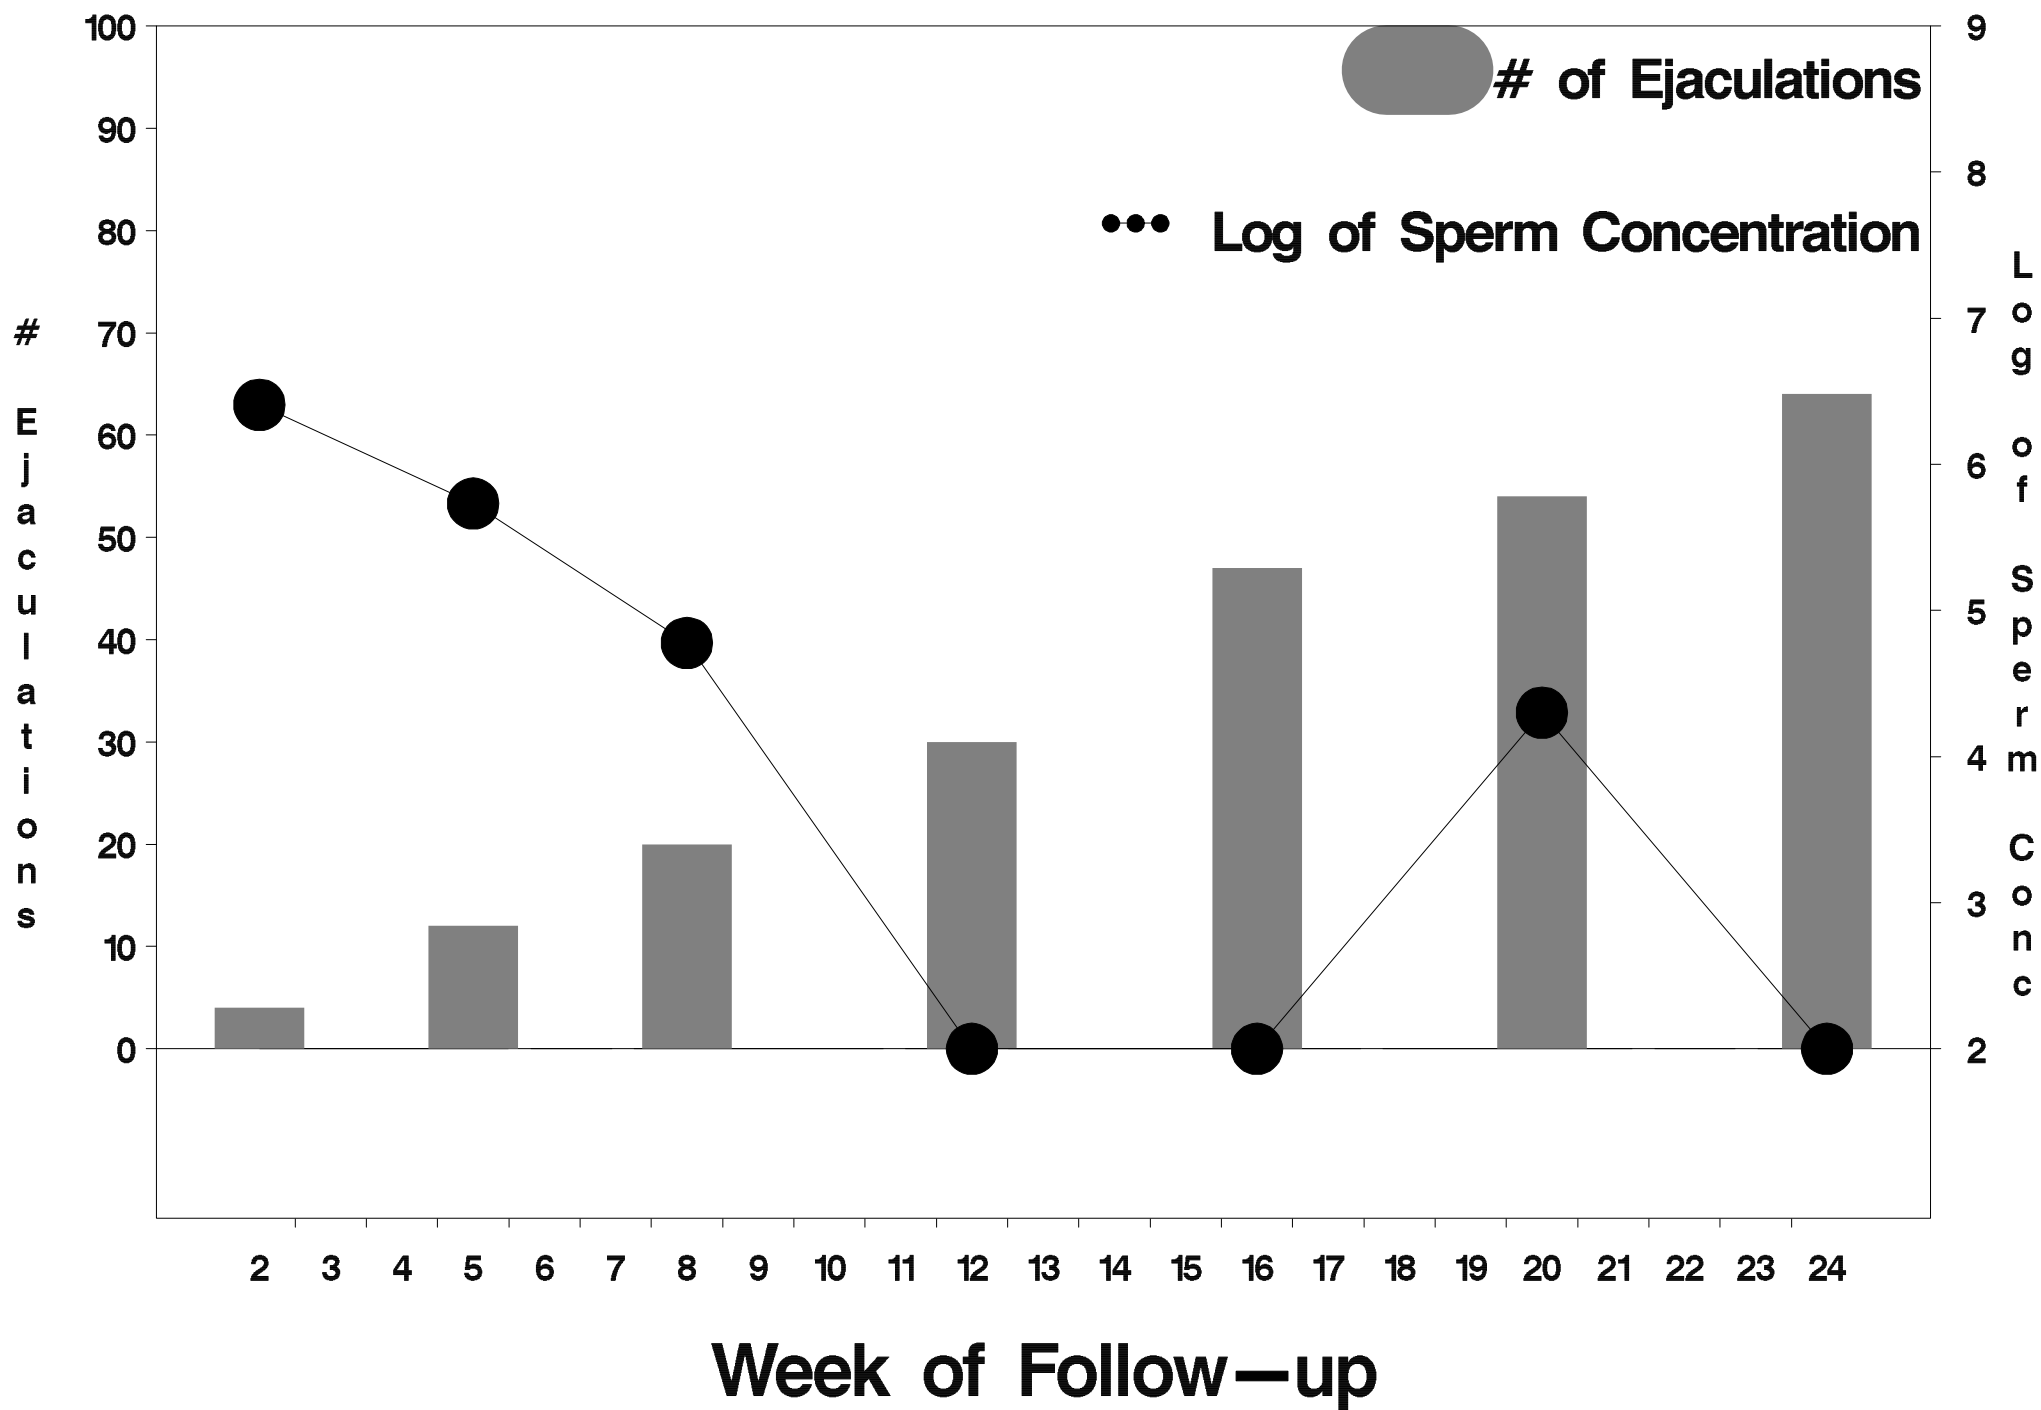

# Participant number= 342

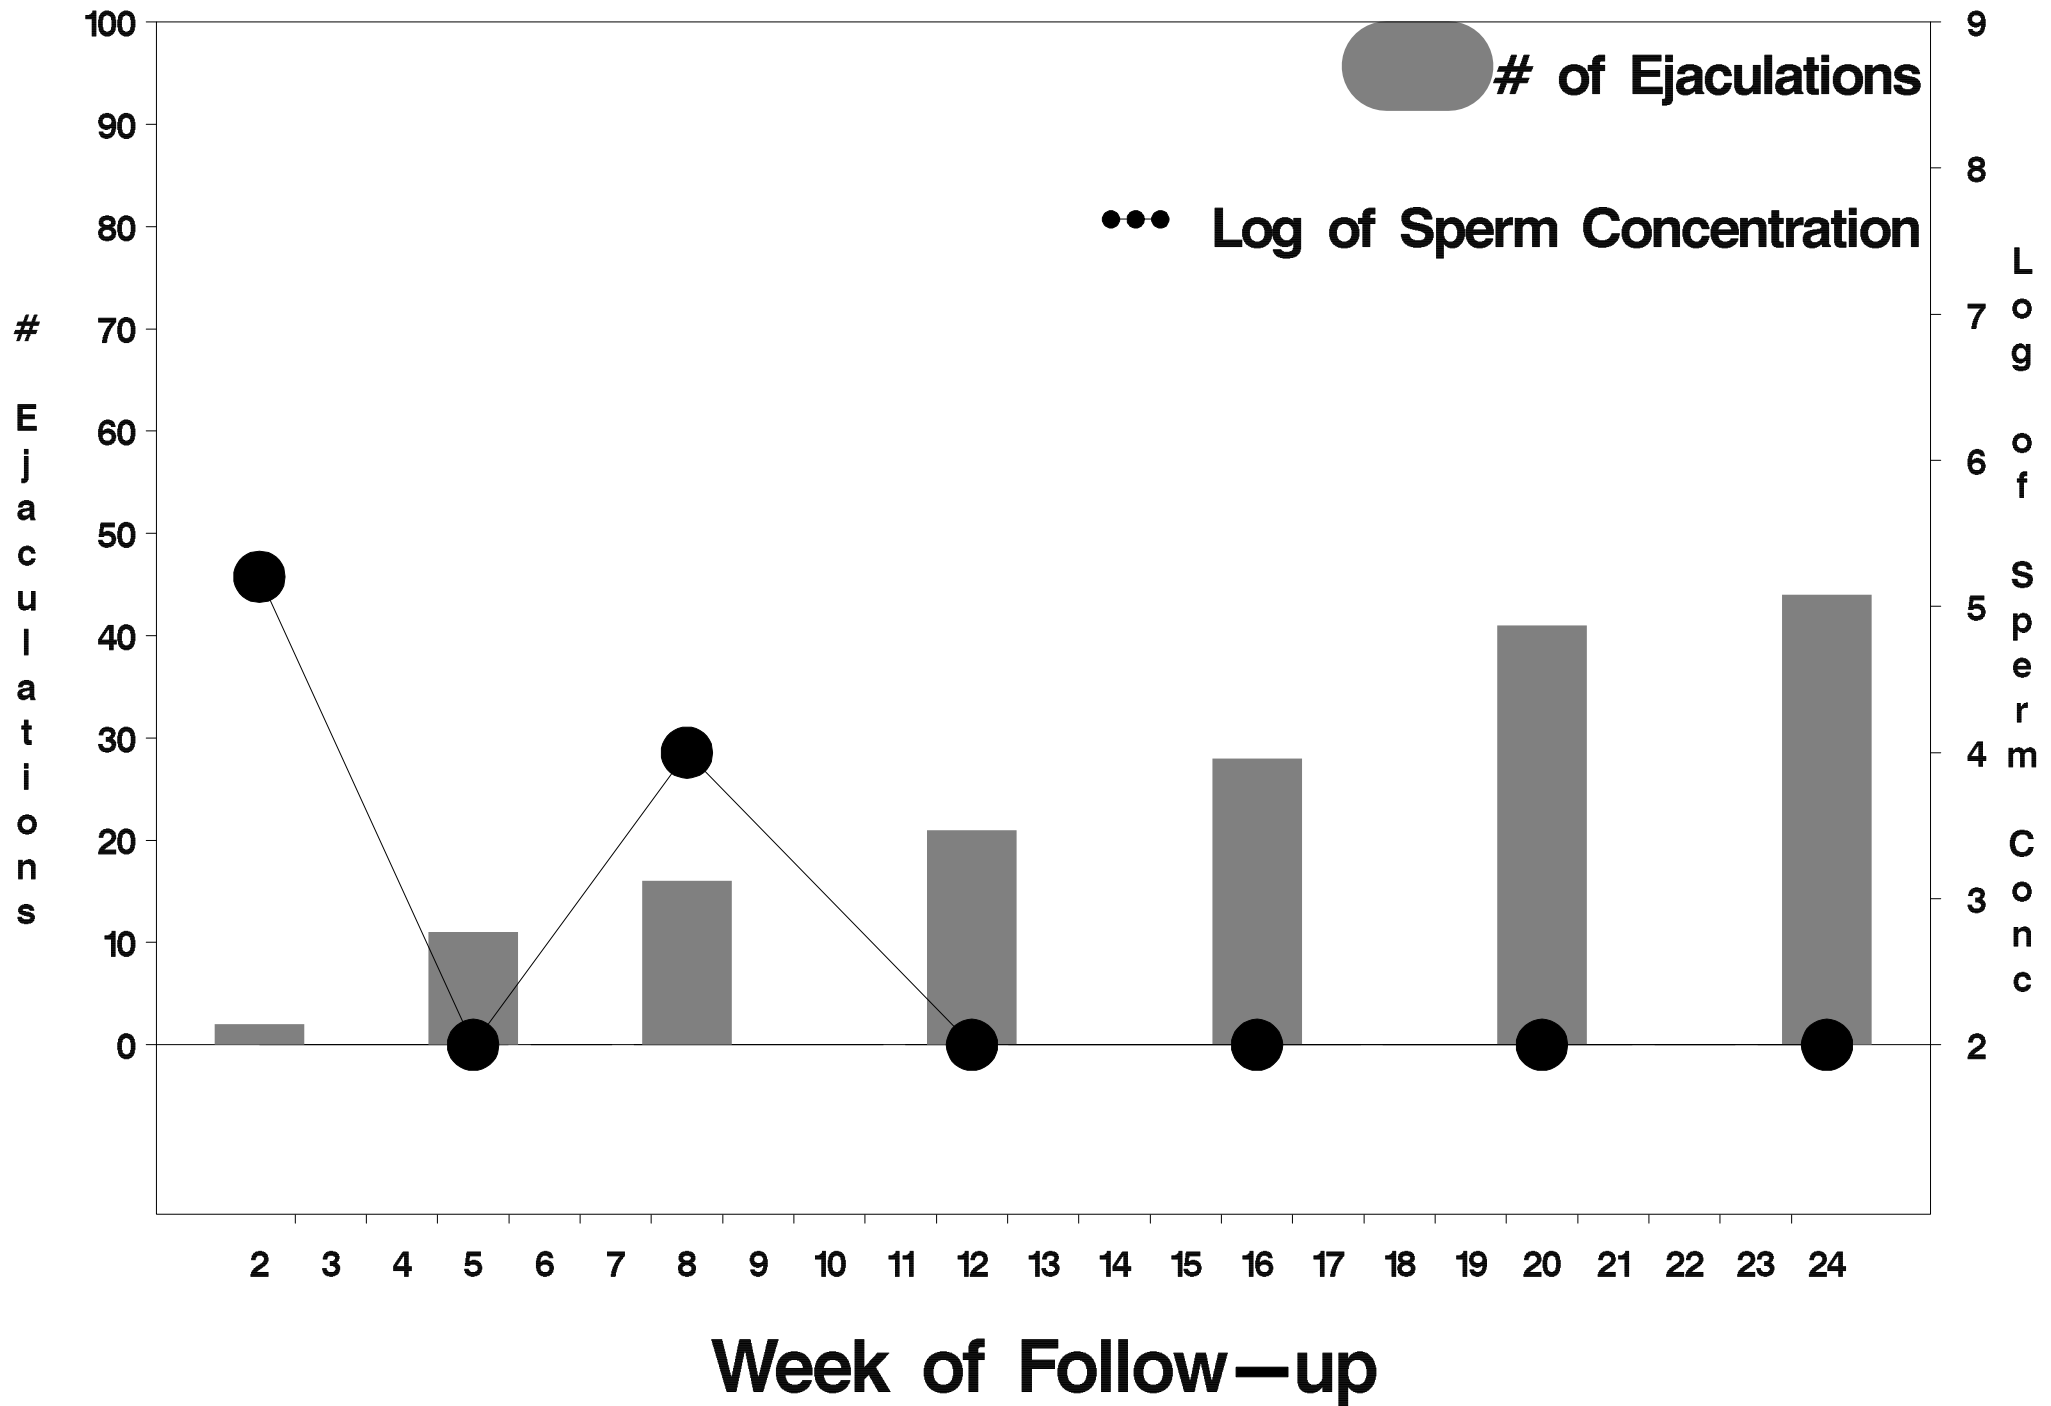

# Participant number= 343

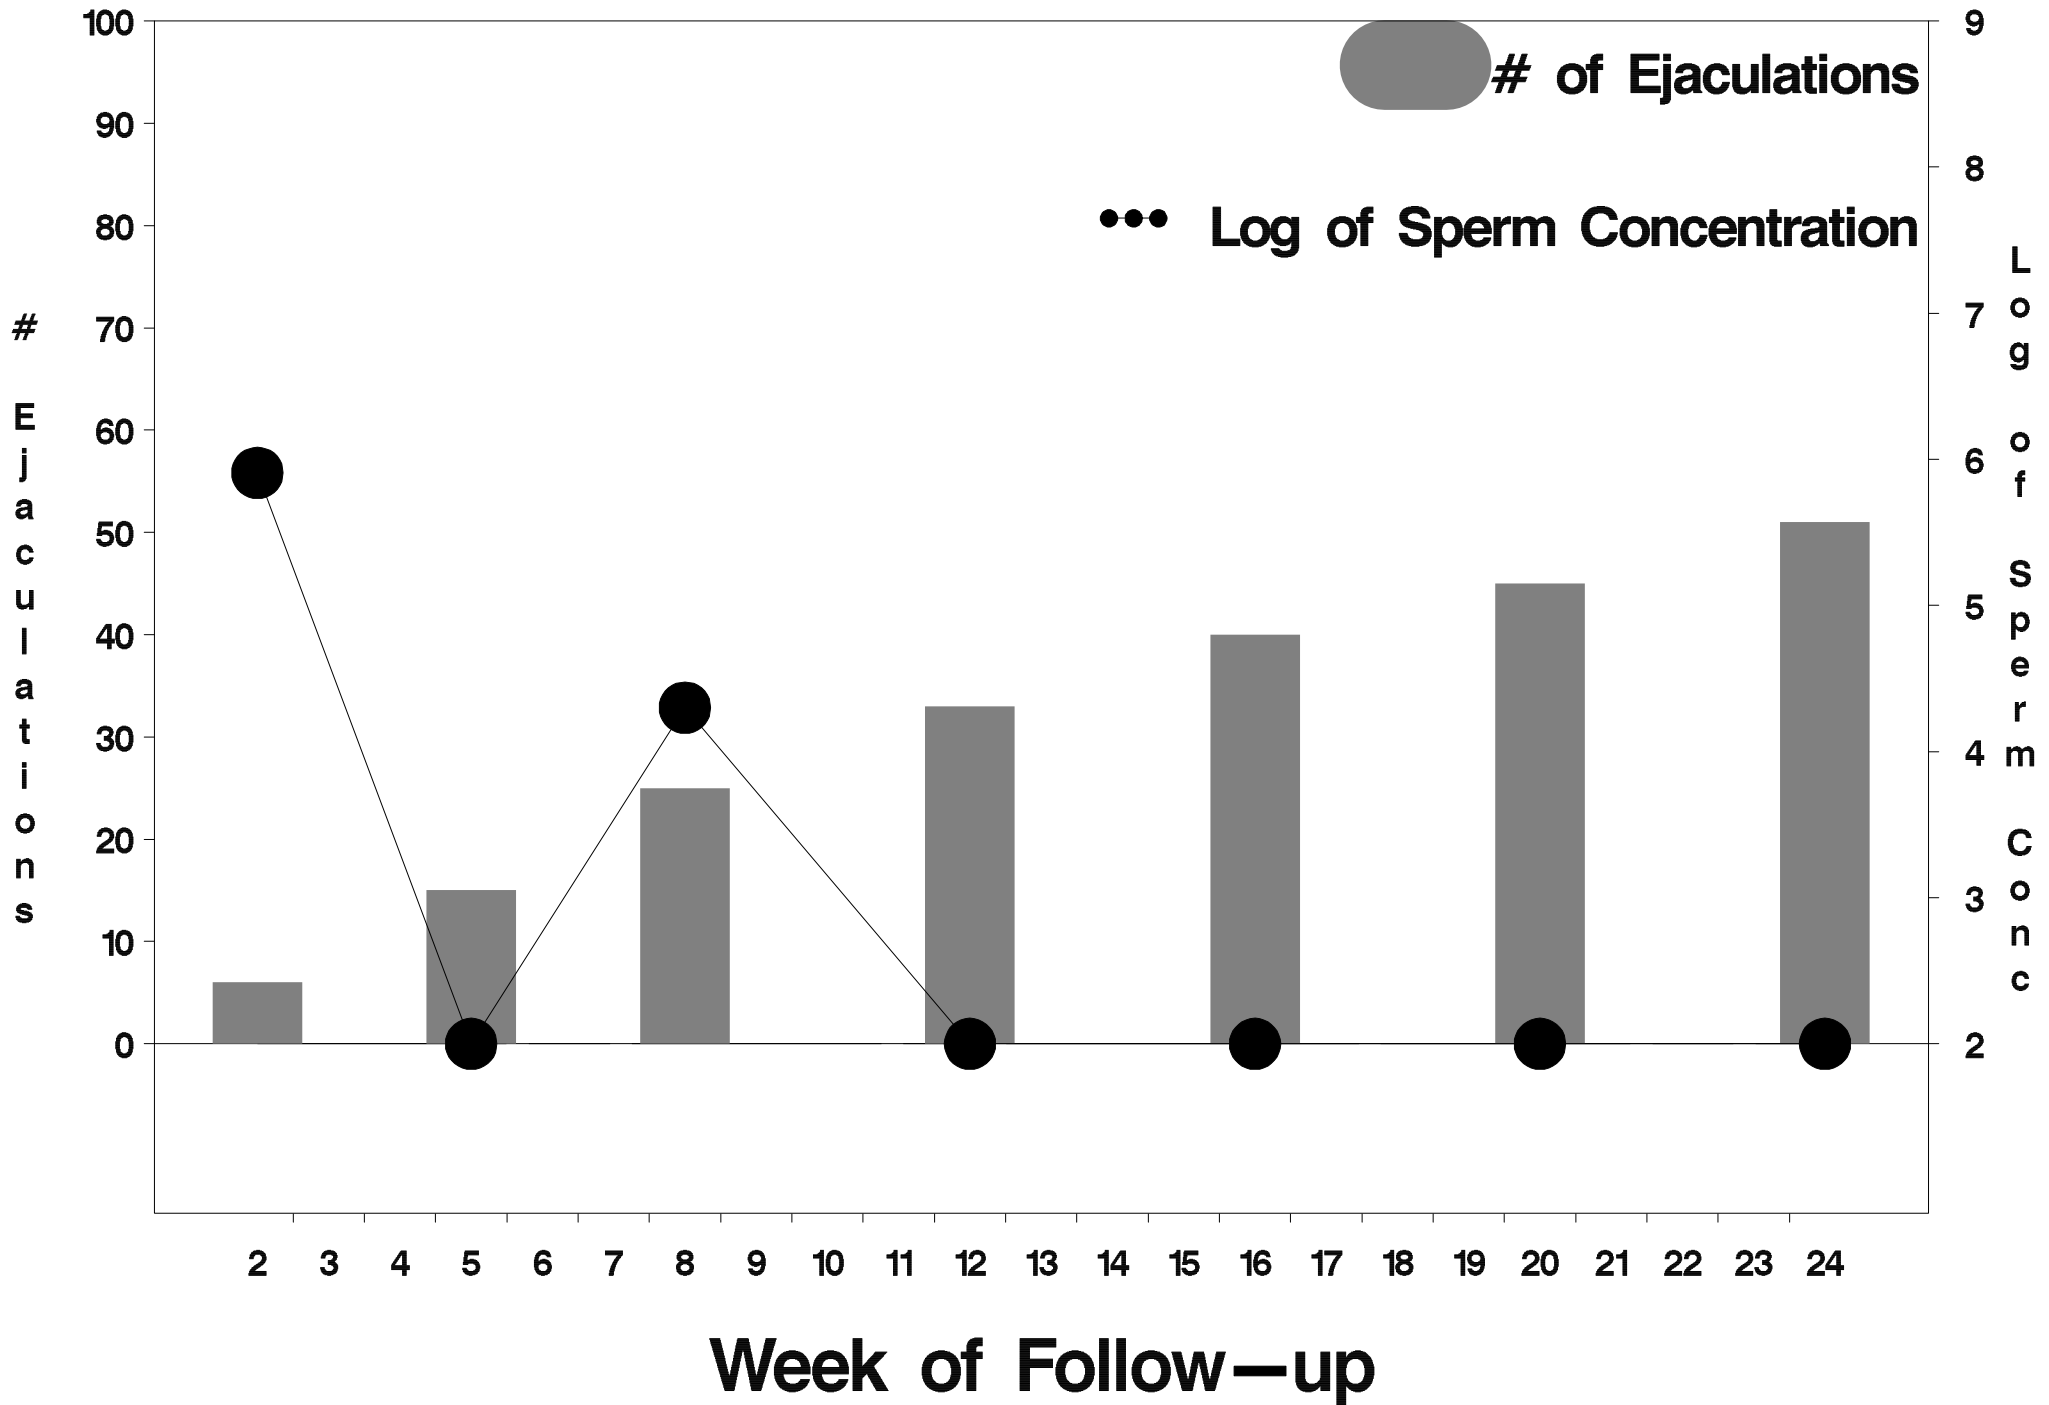

# Participant number= 344

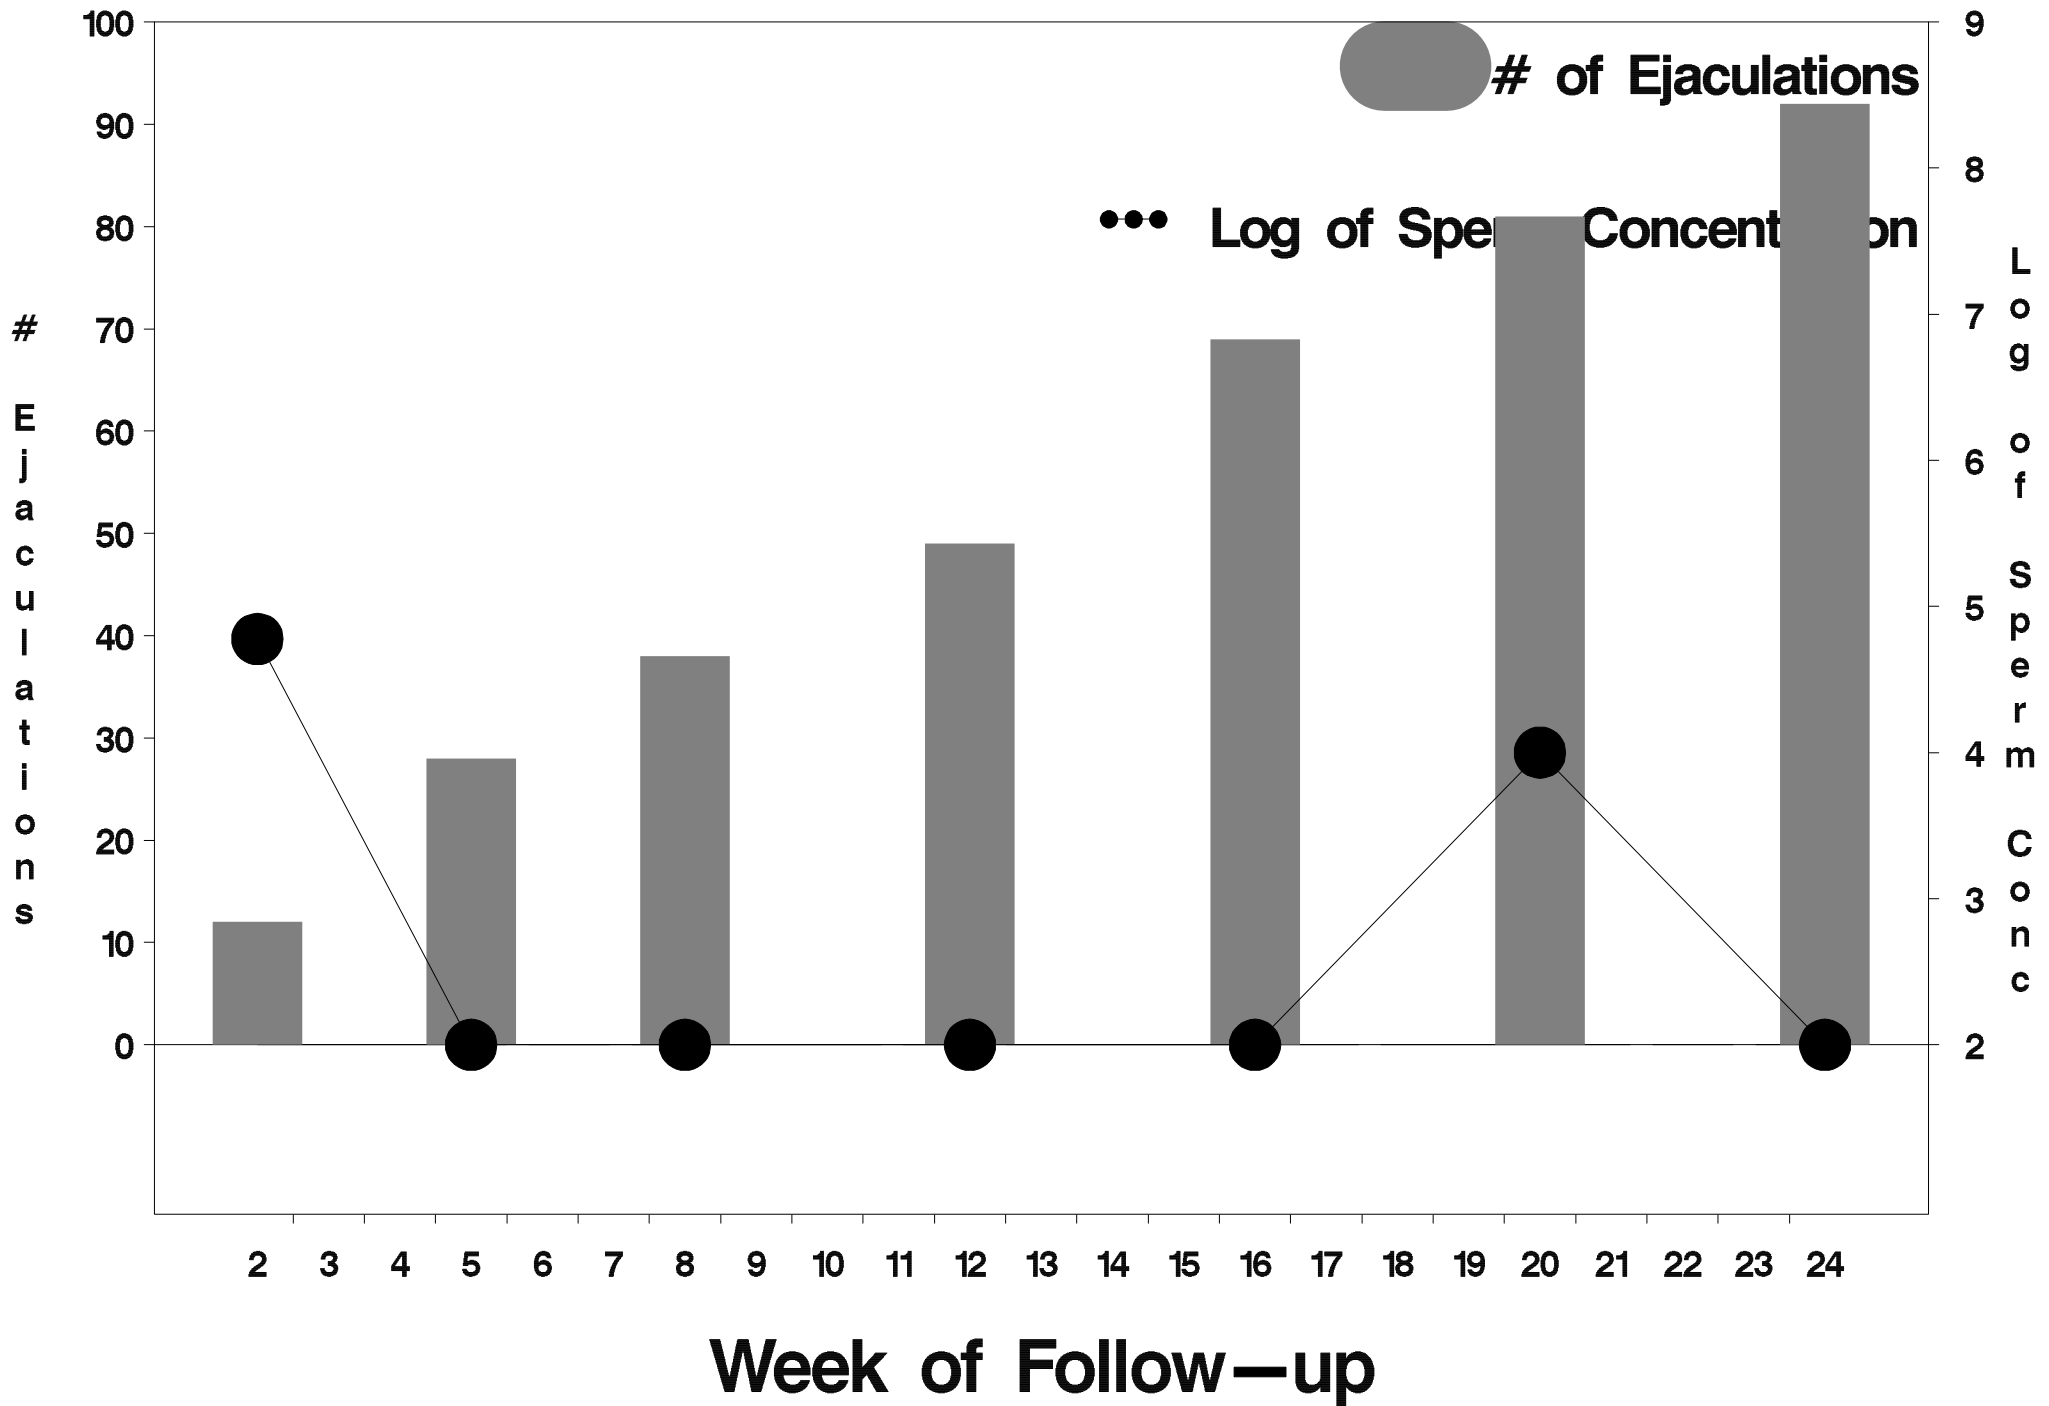

# Participant number= 345

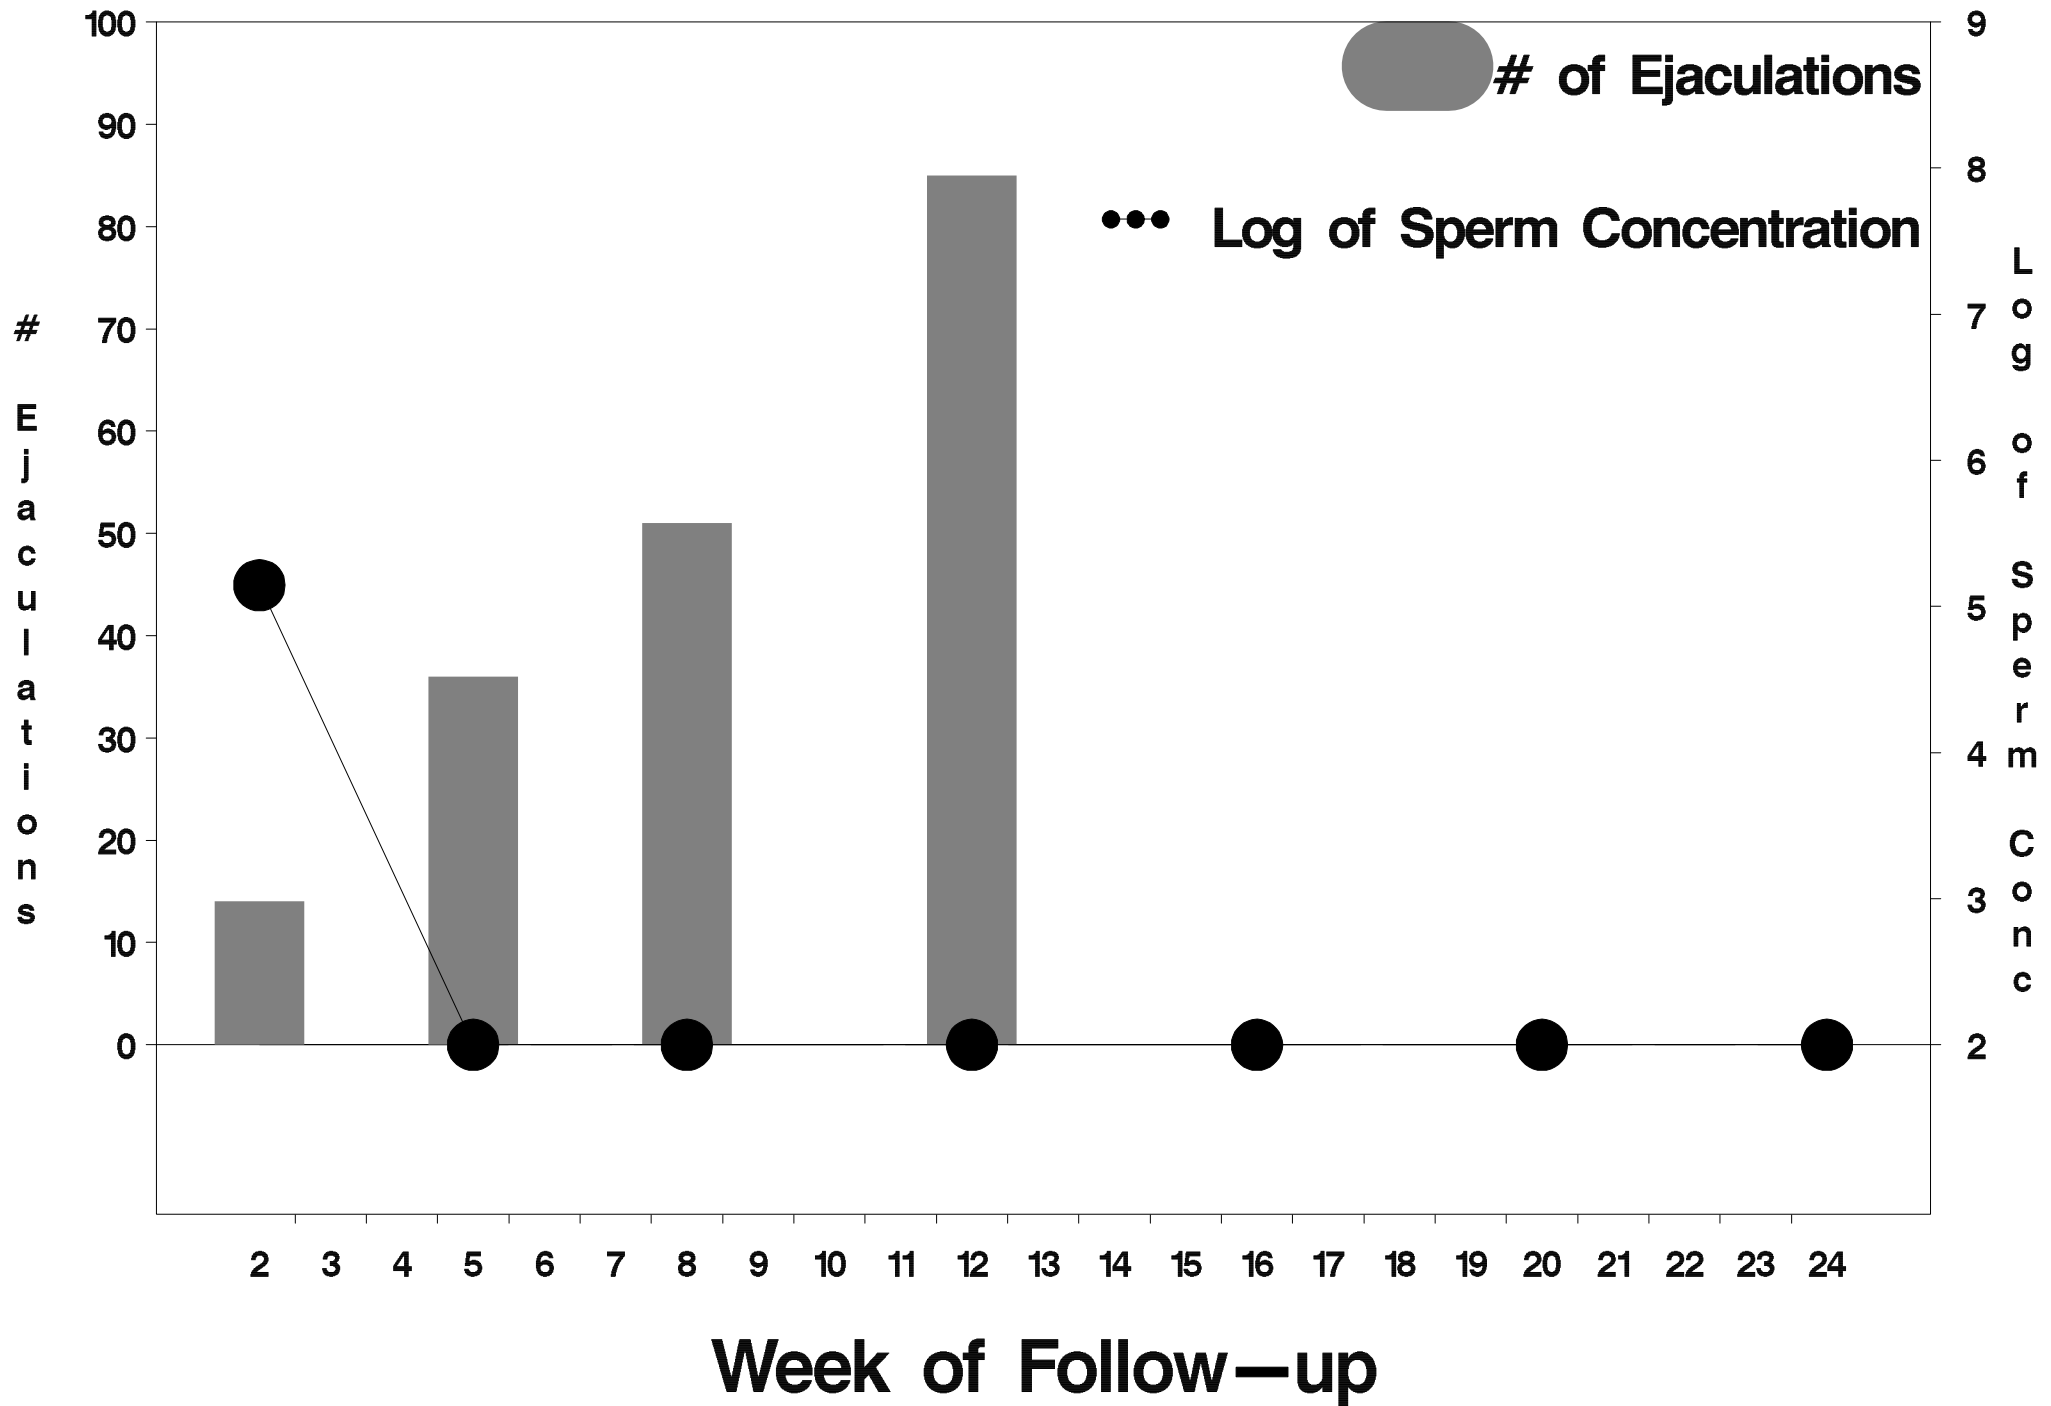



# Participant number= 346

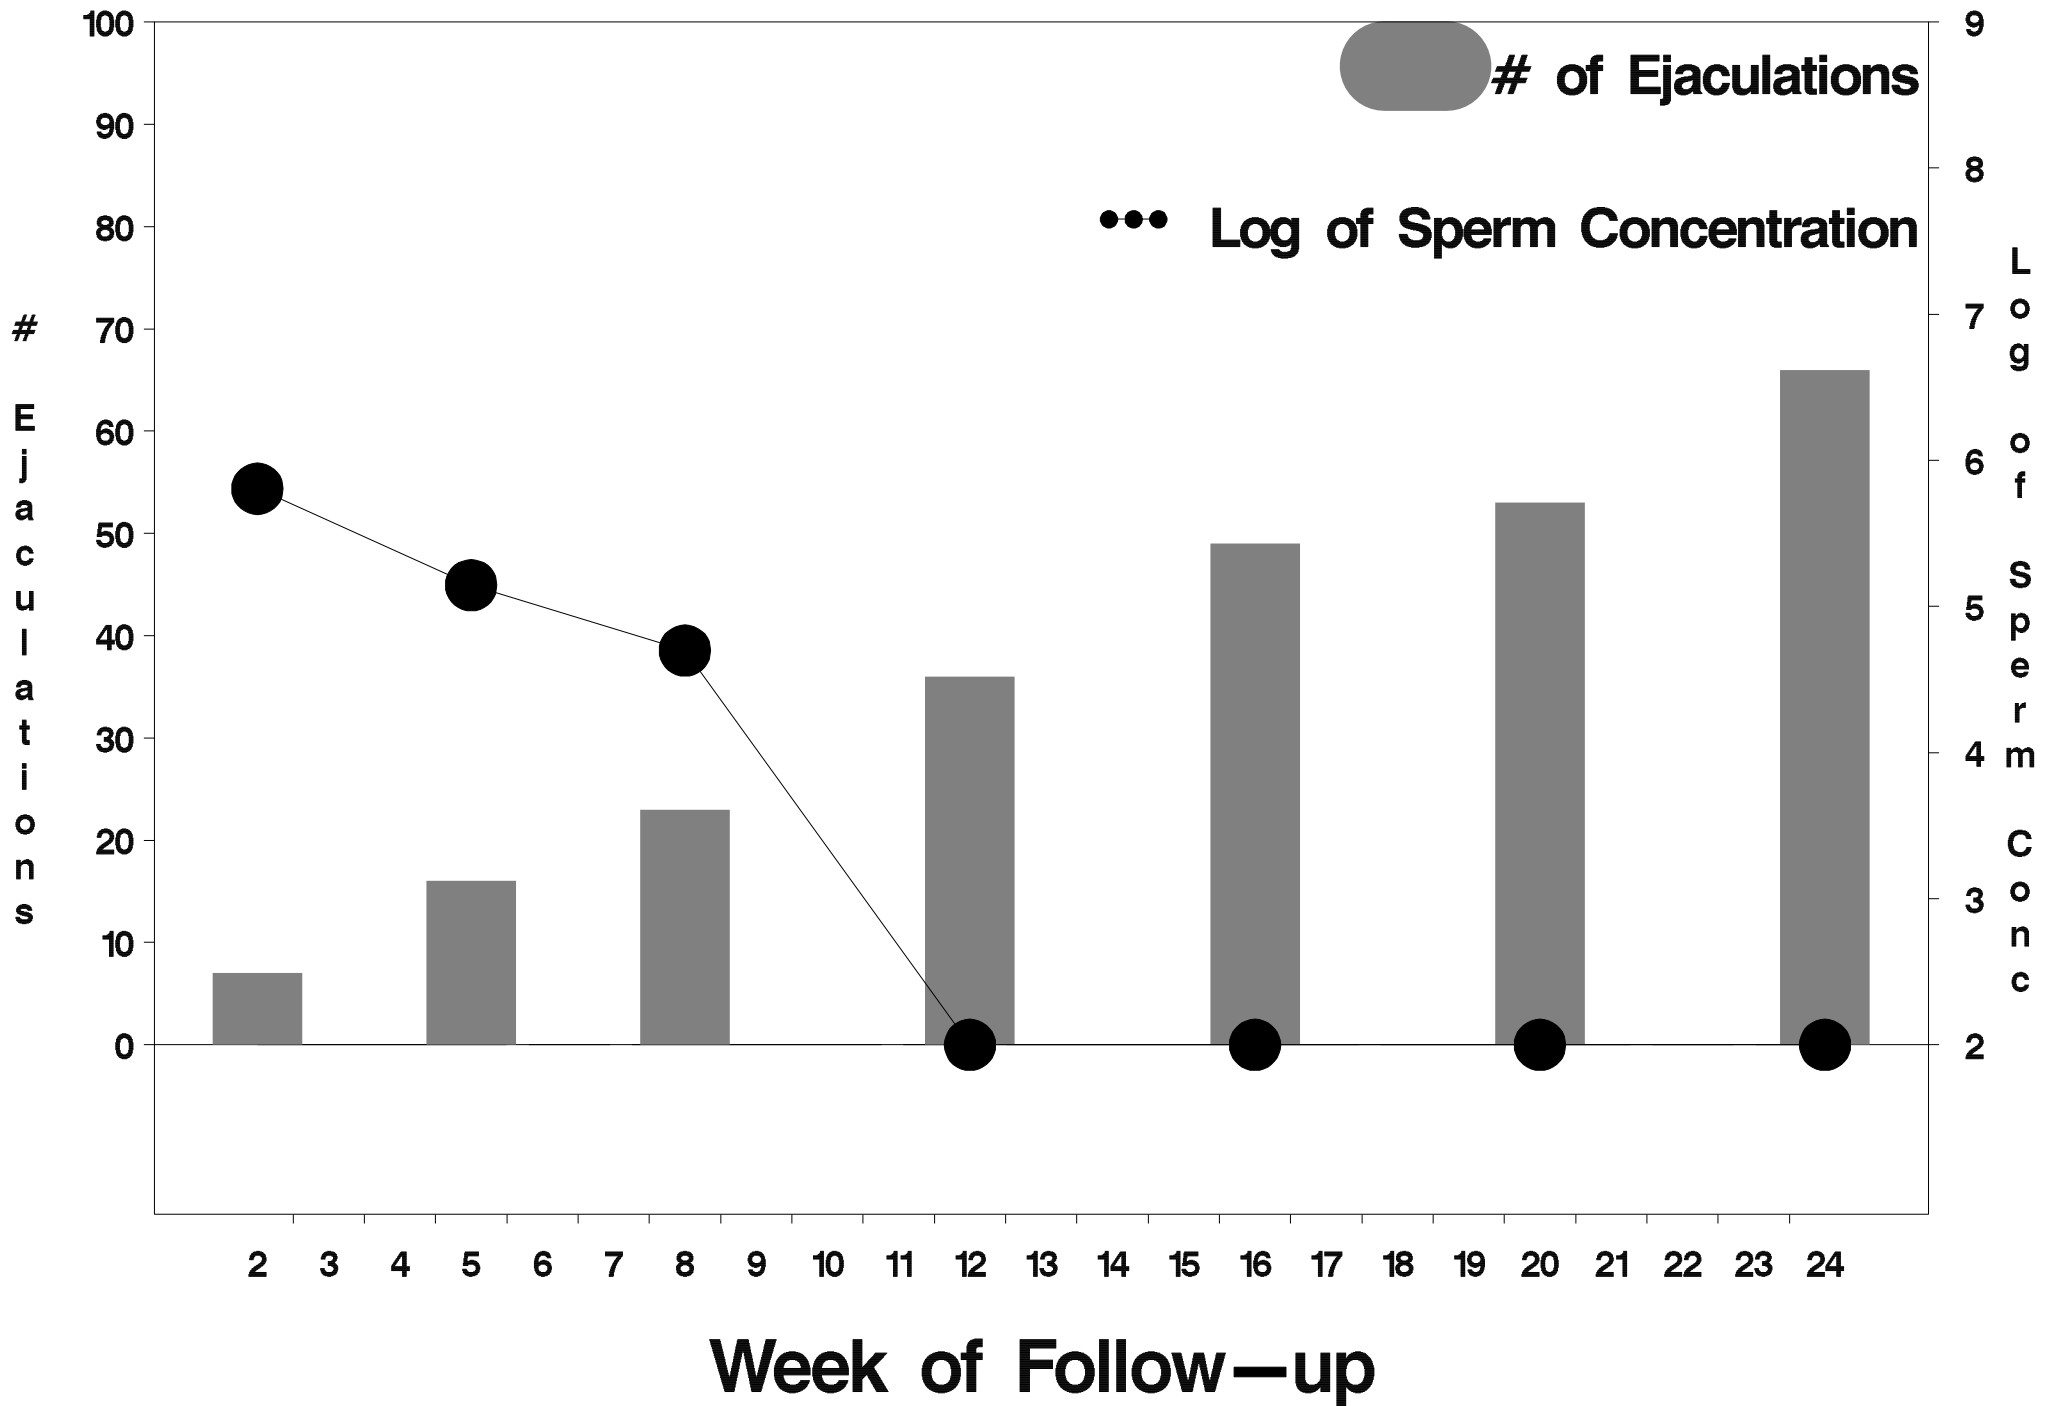

# Participant number= 347

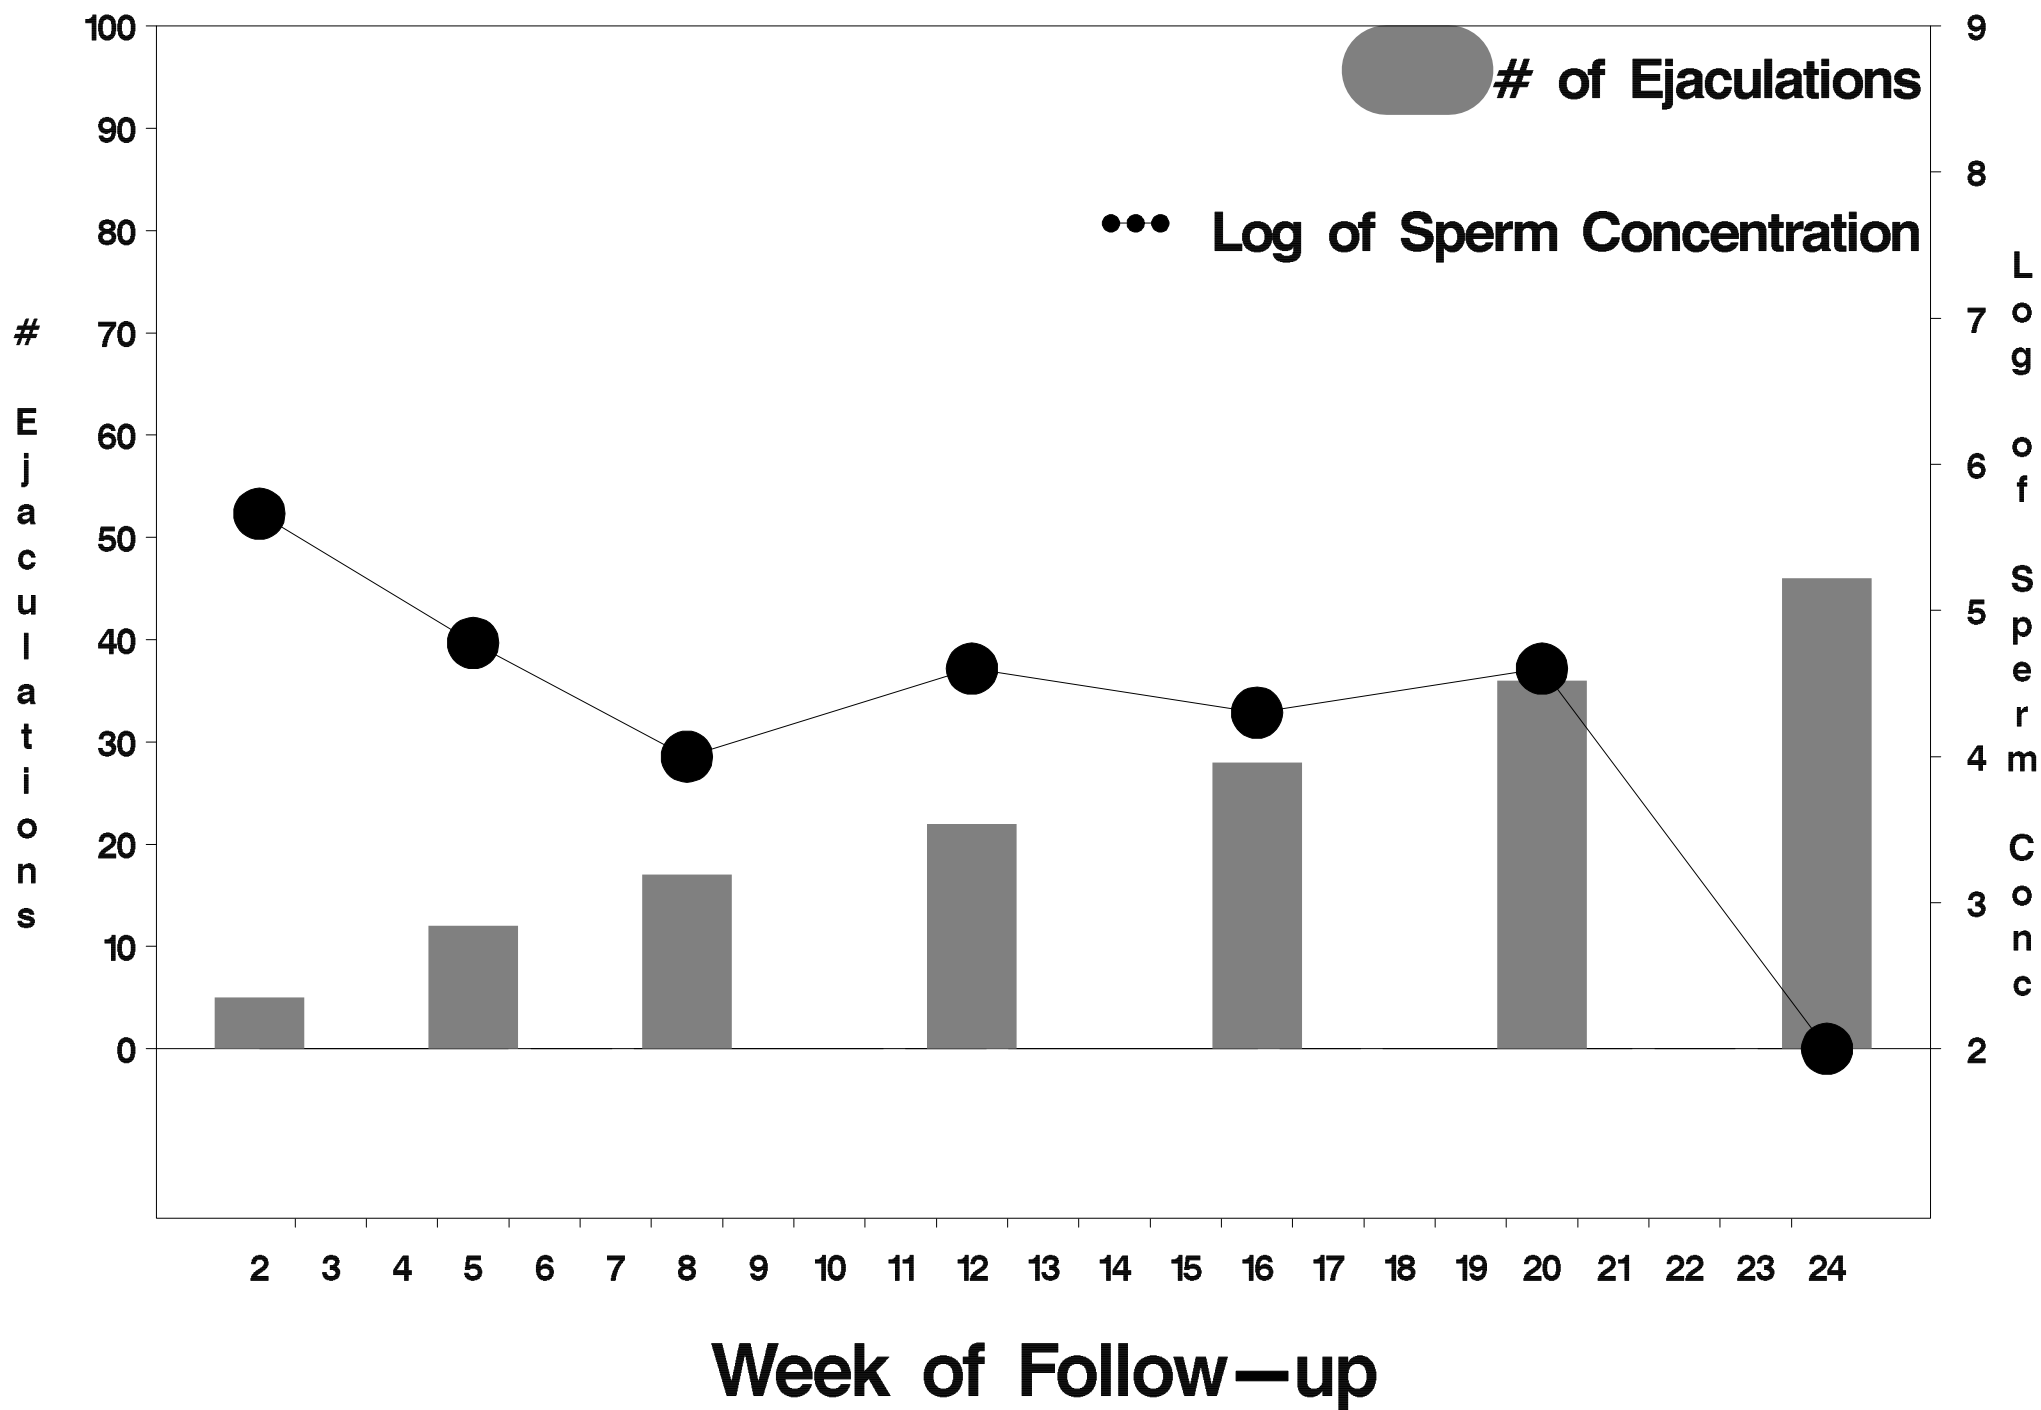

# Participant number= 348

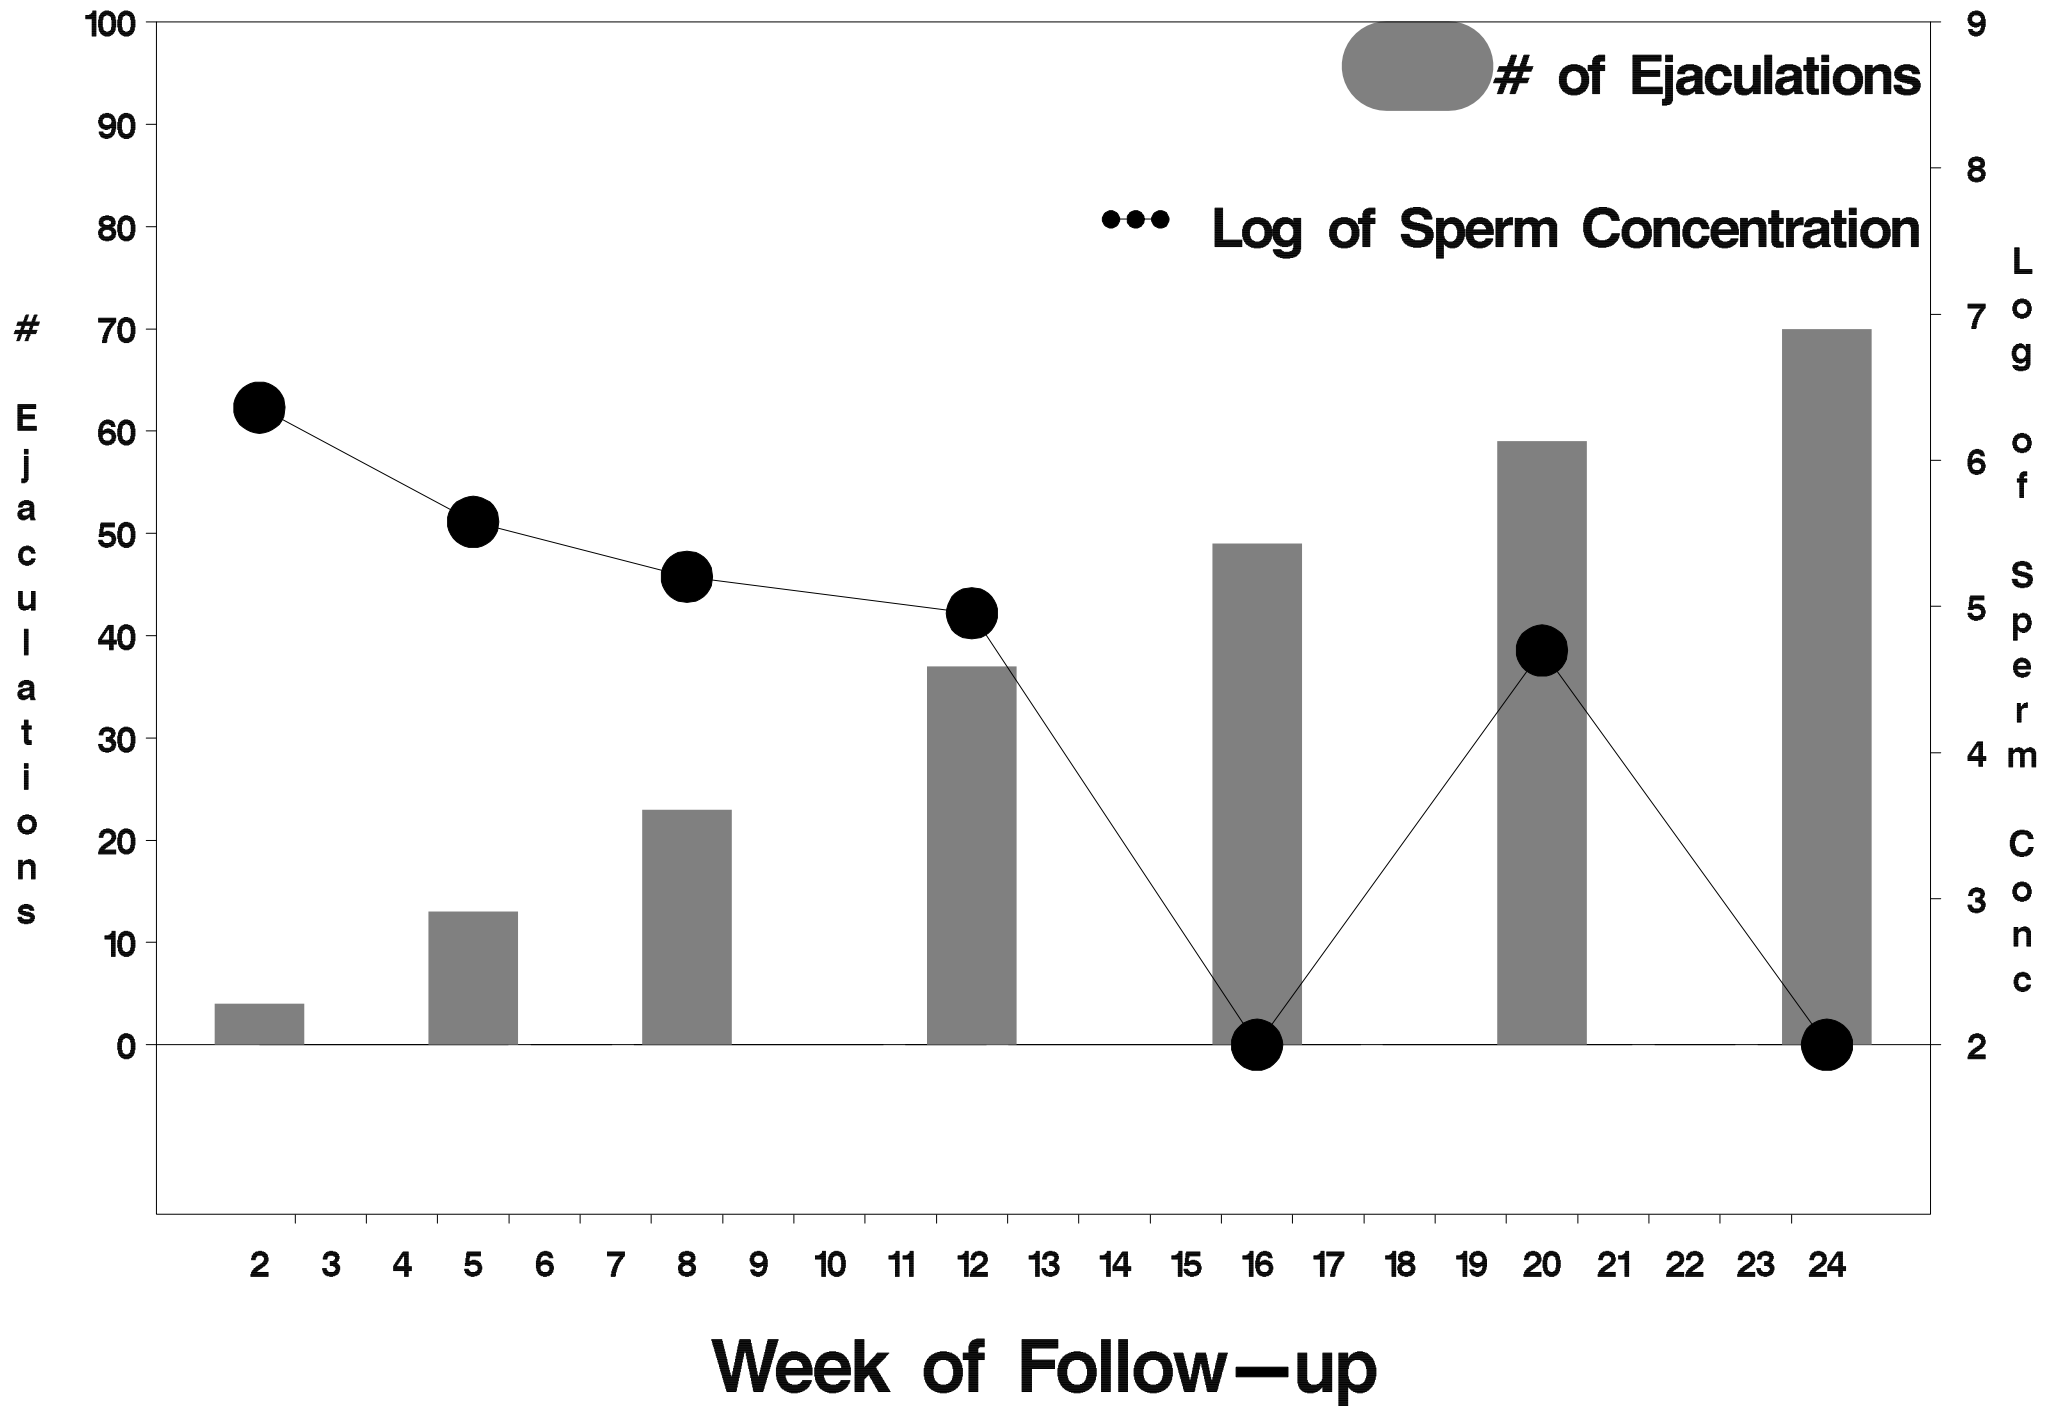

# Participant number= 349

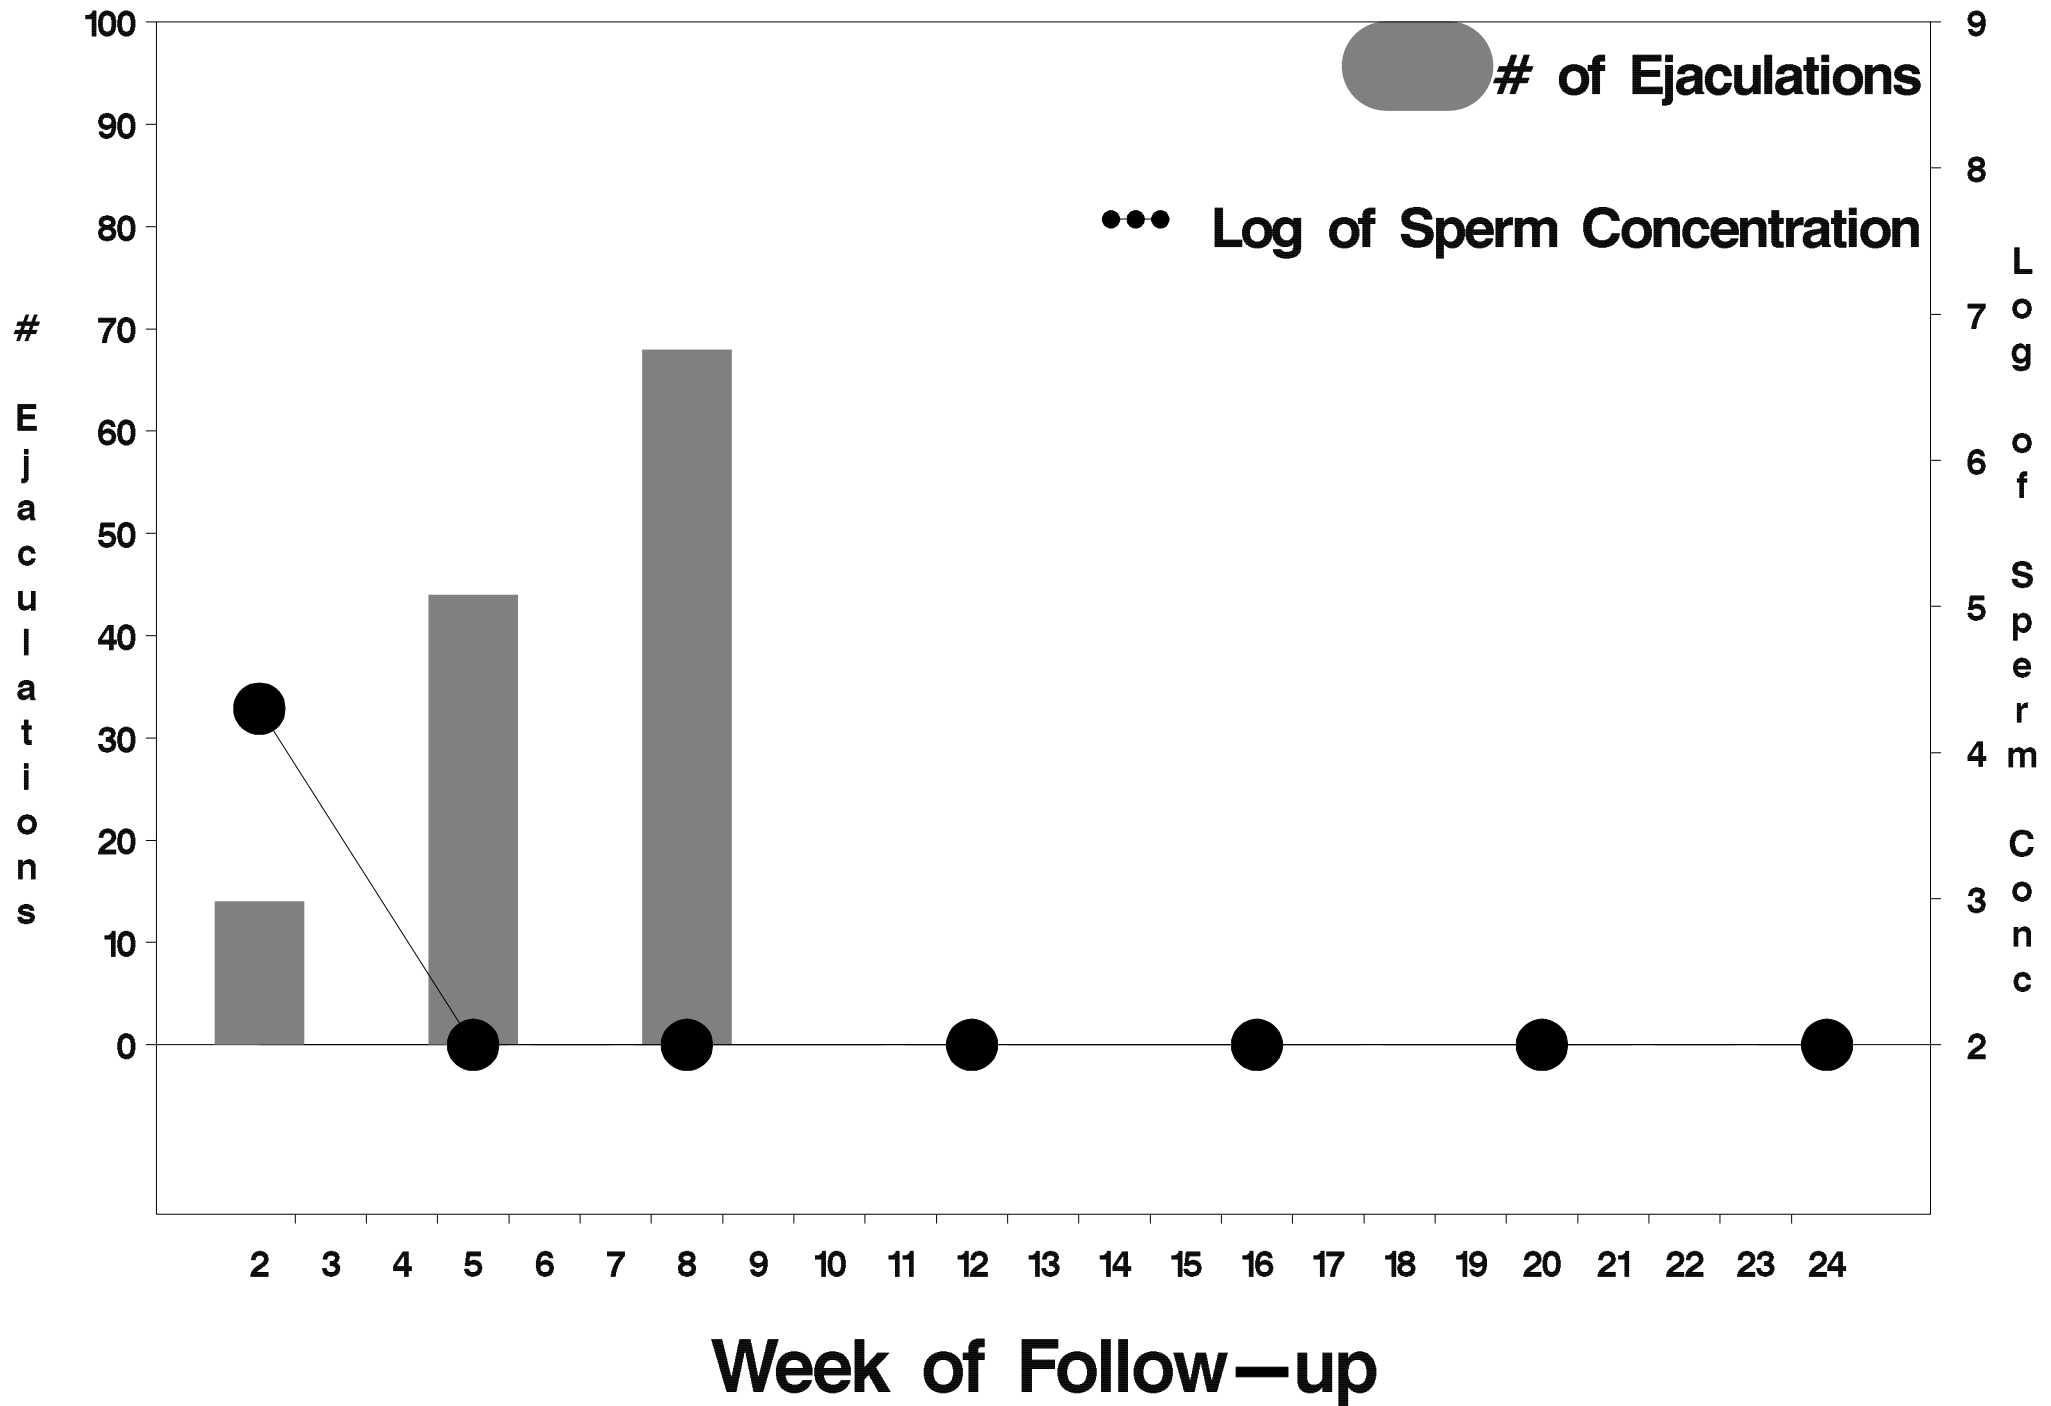

# Participant number= 350

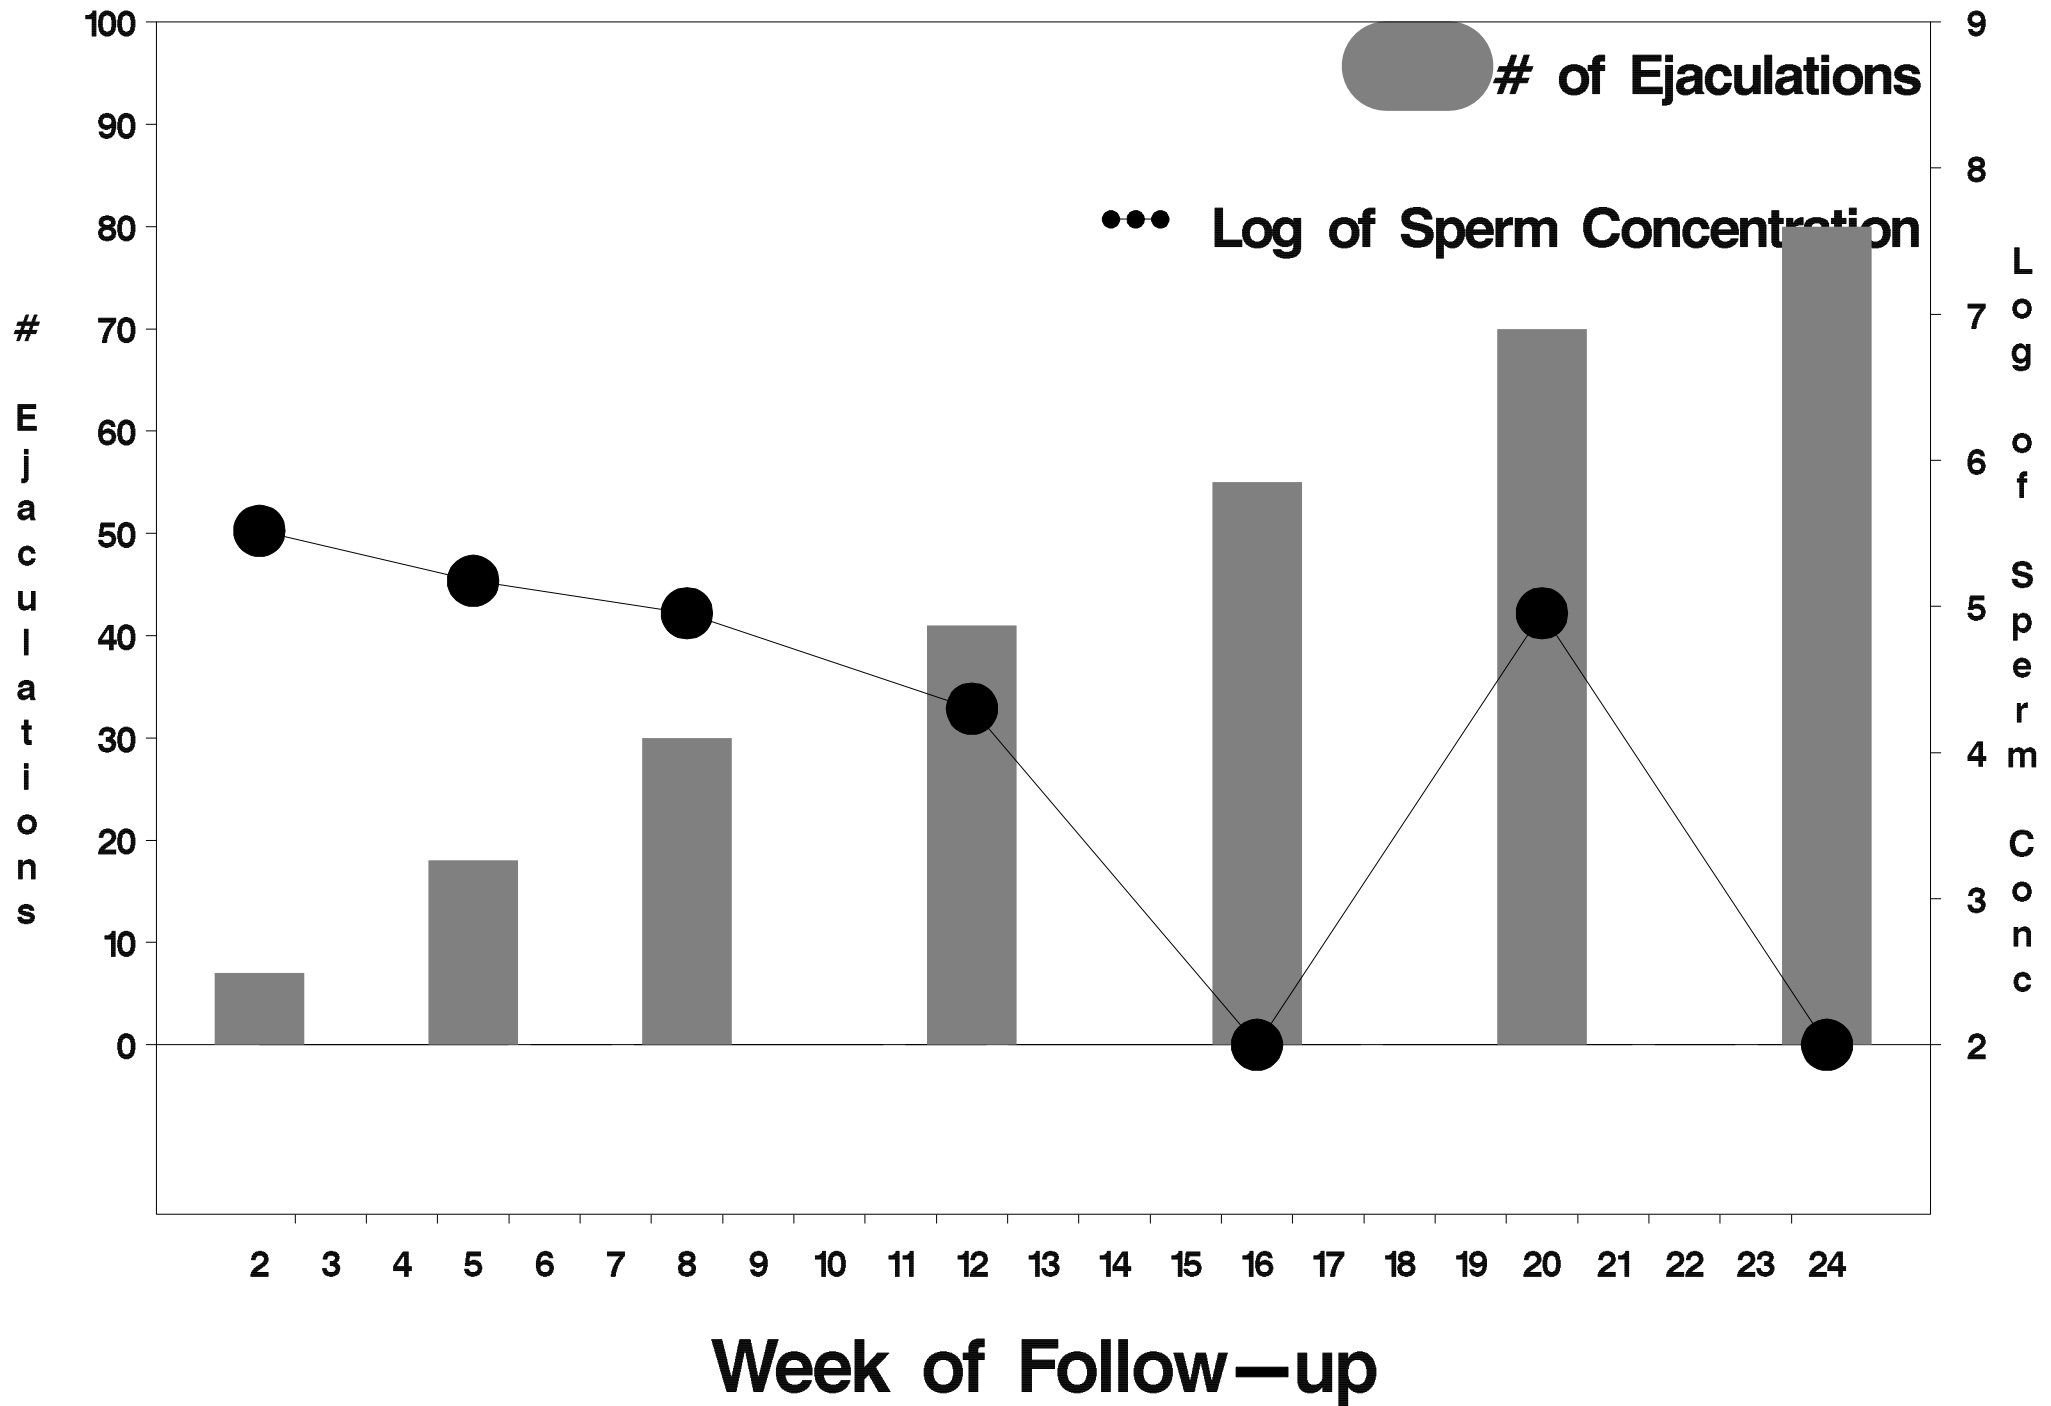

# Participant number= 351

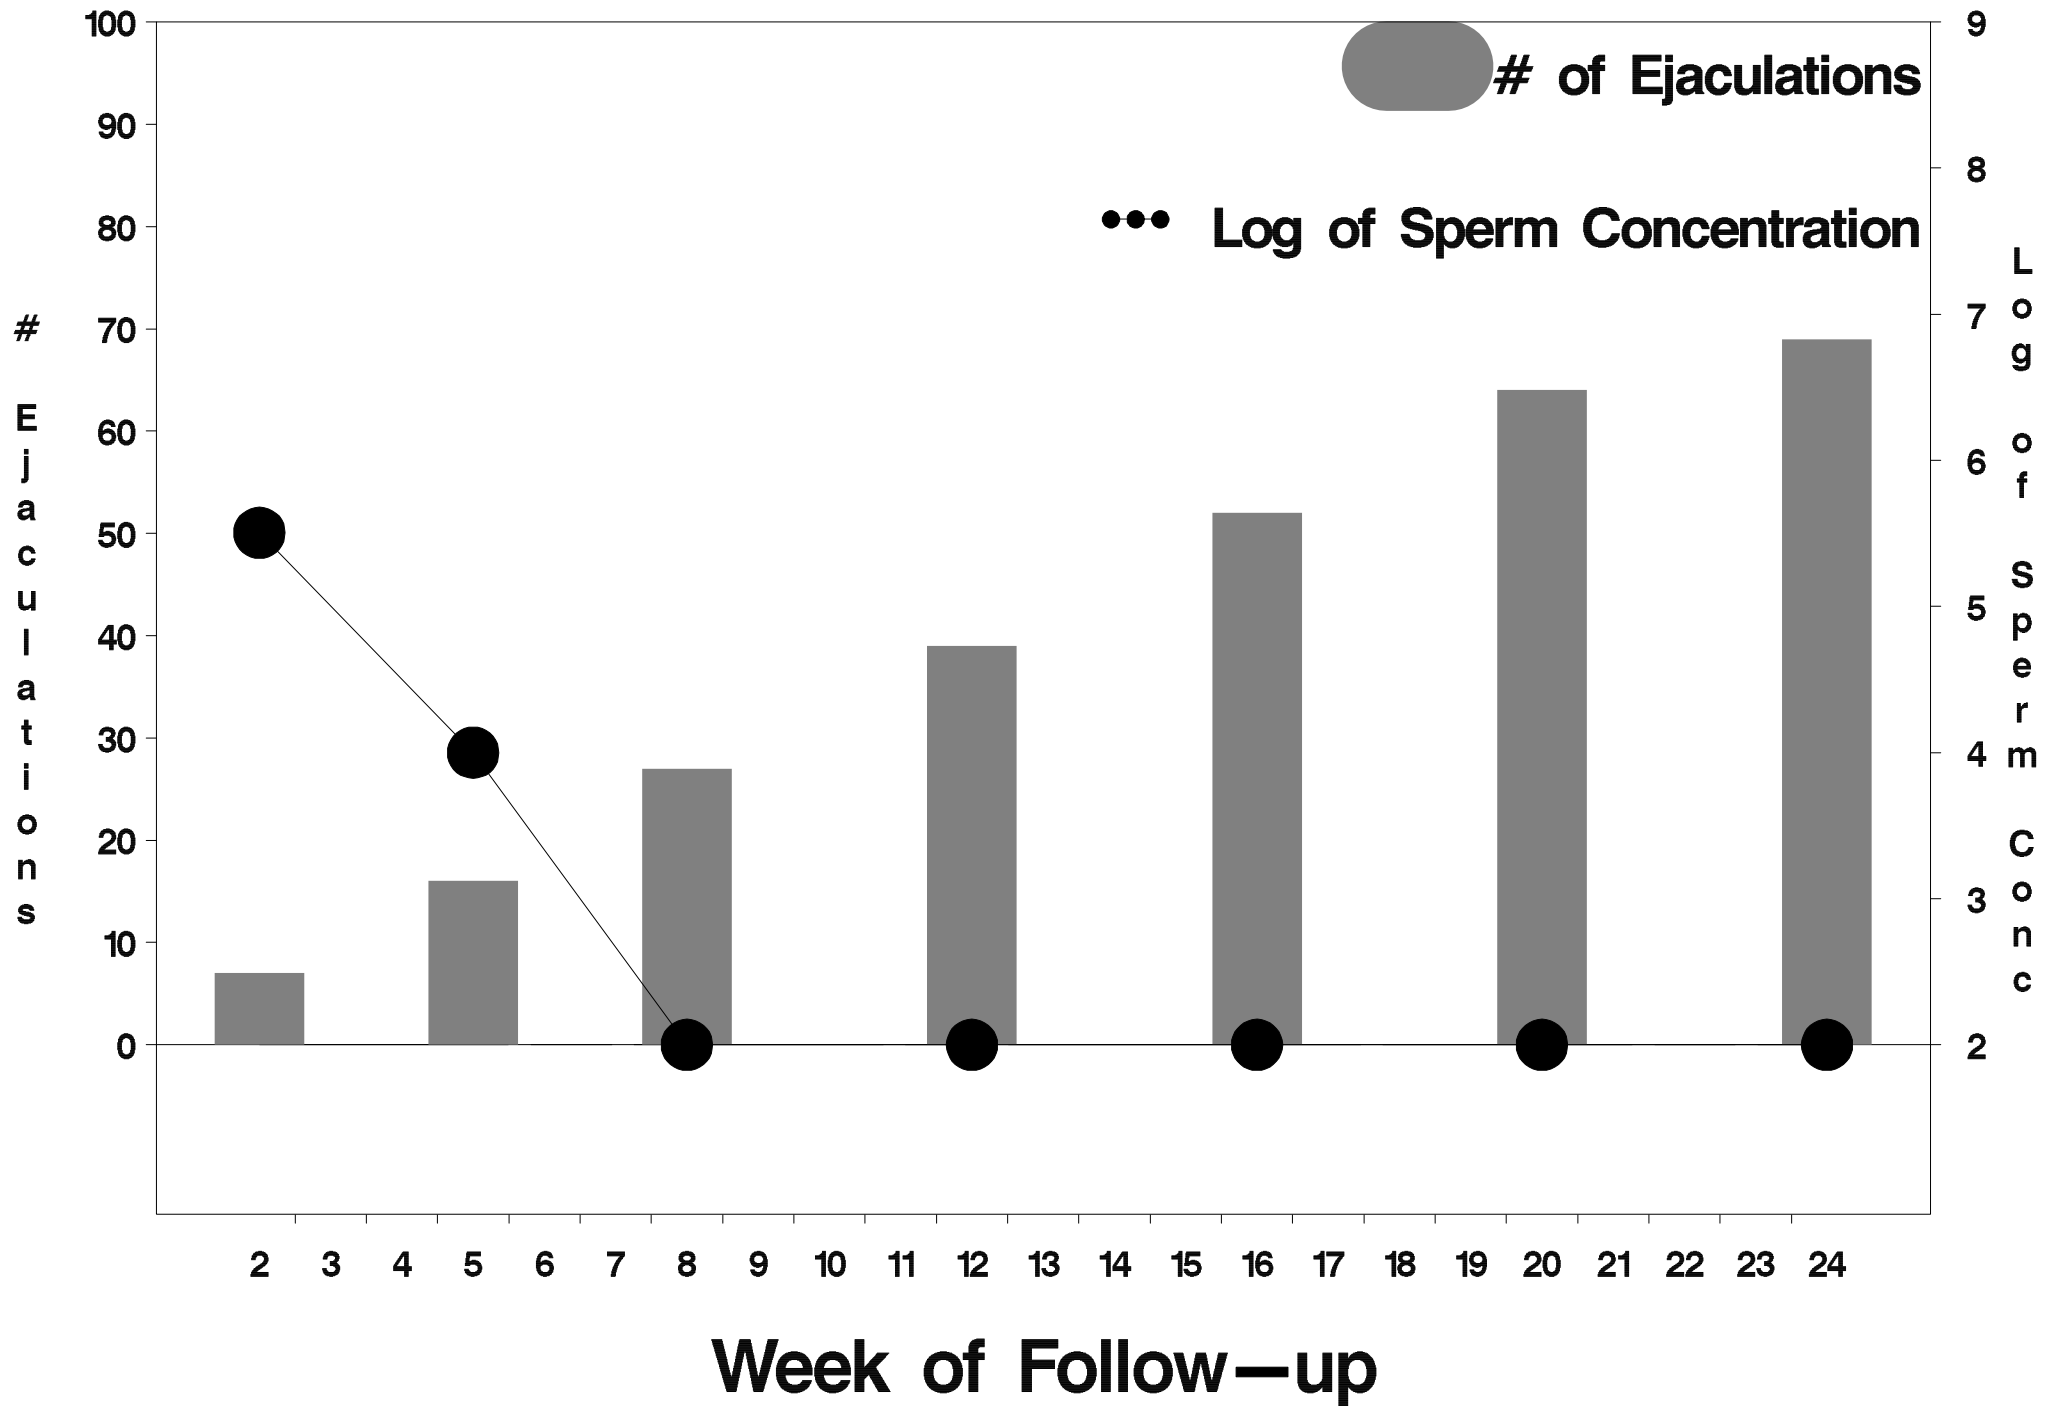

# Participant number= 352

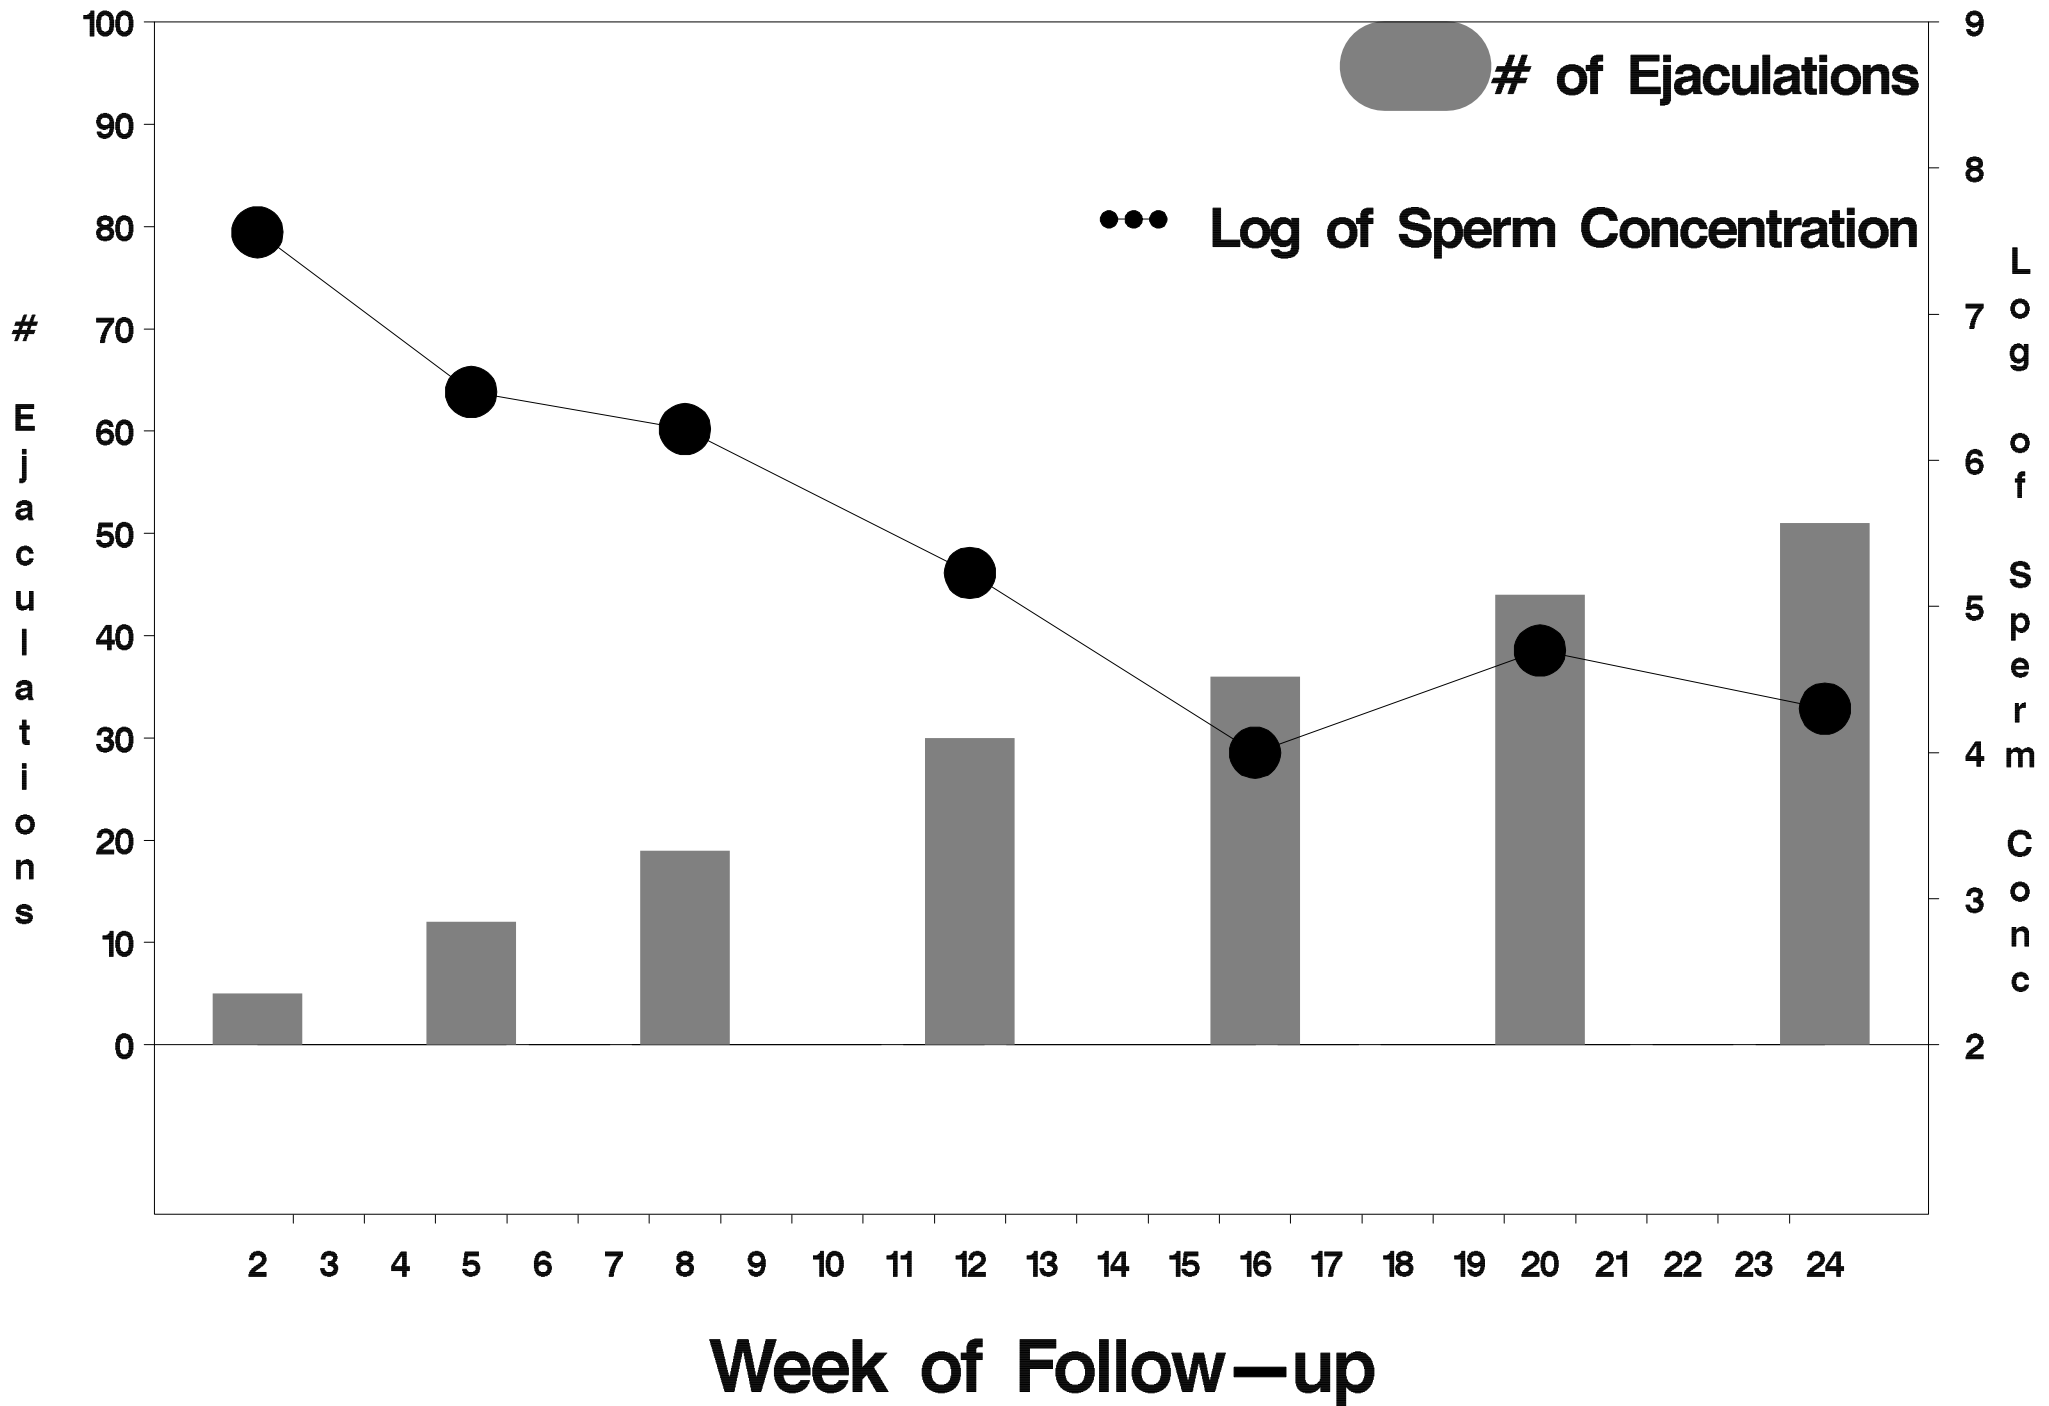

# Participant number= 353

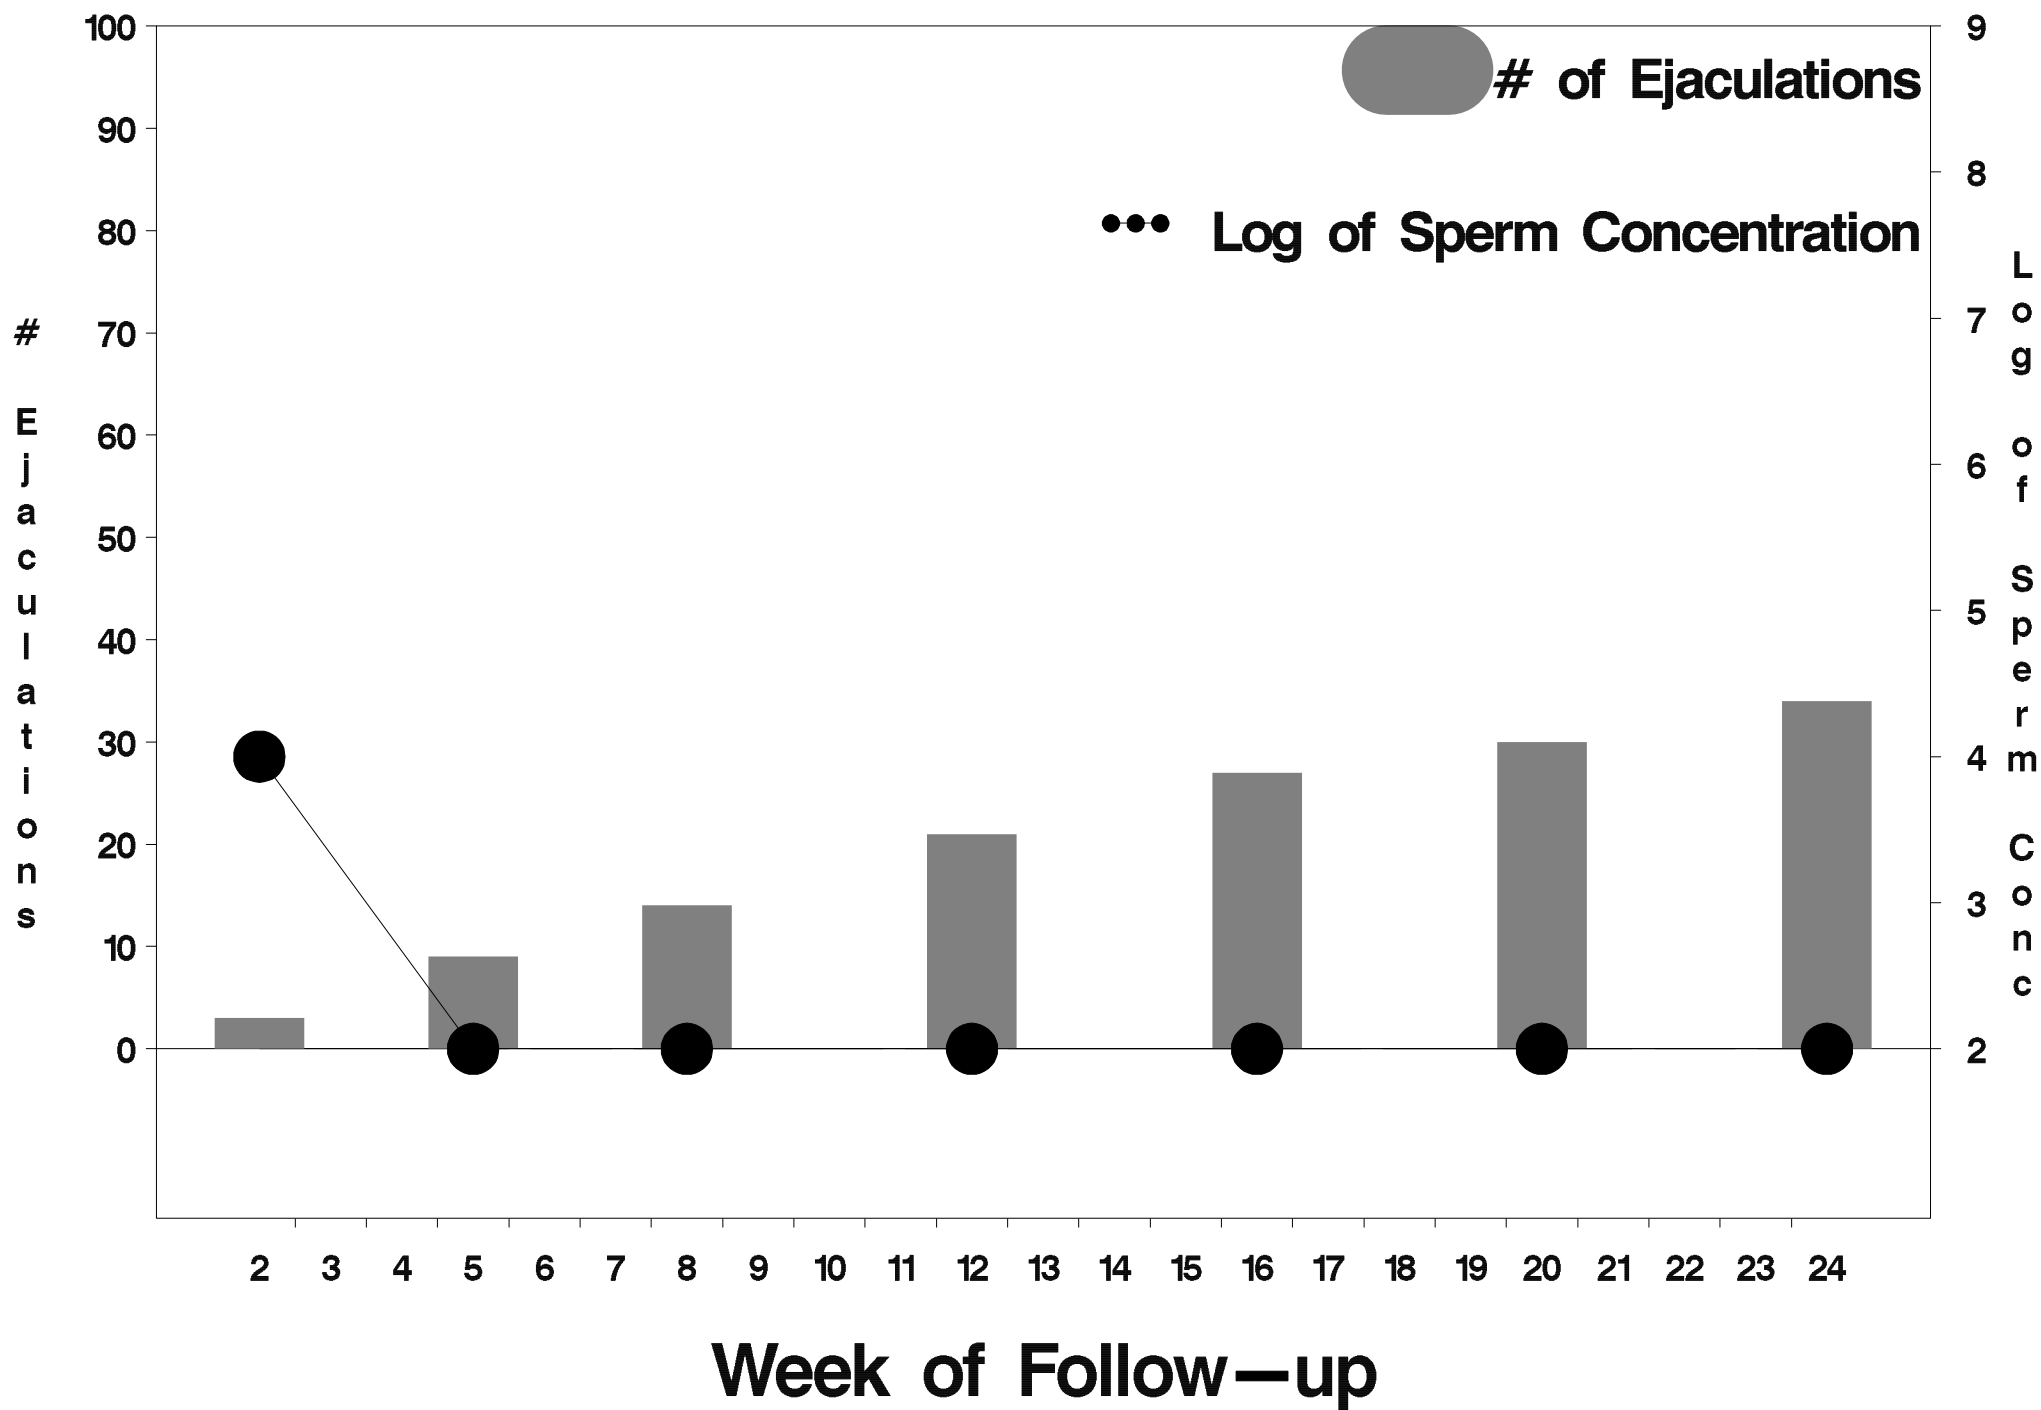



# Participant number= 354

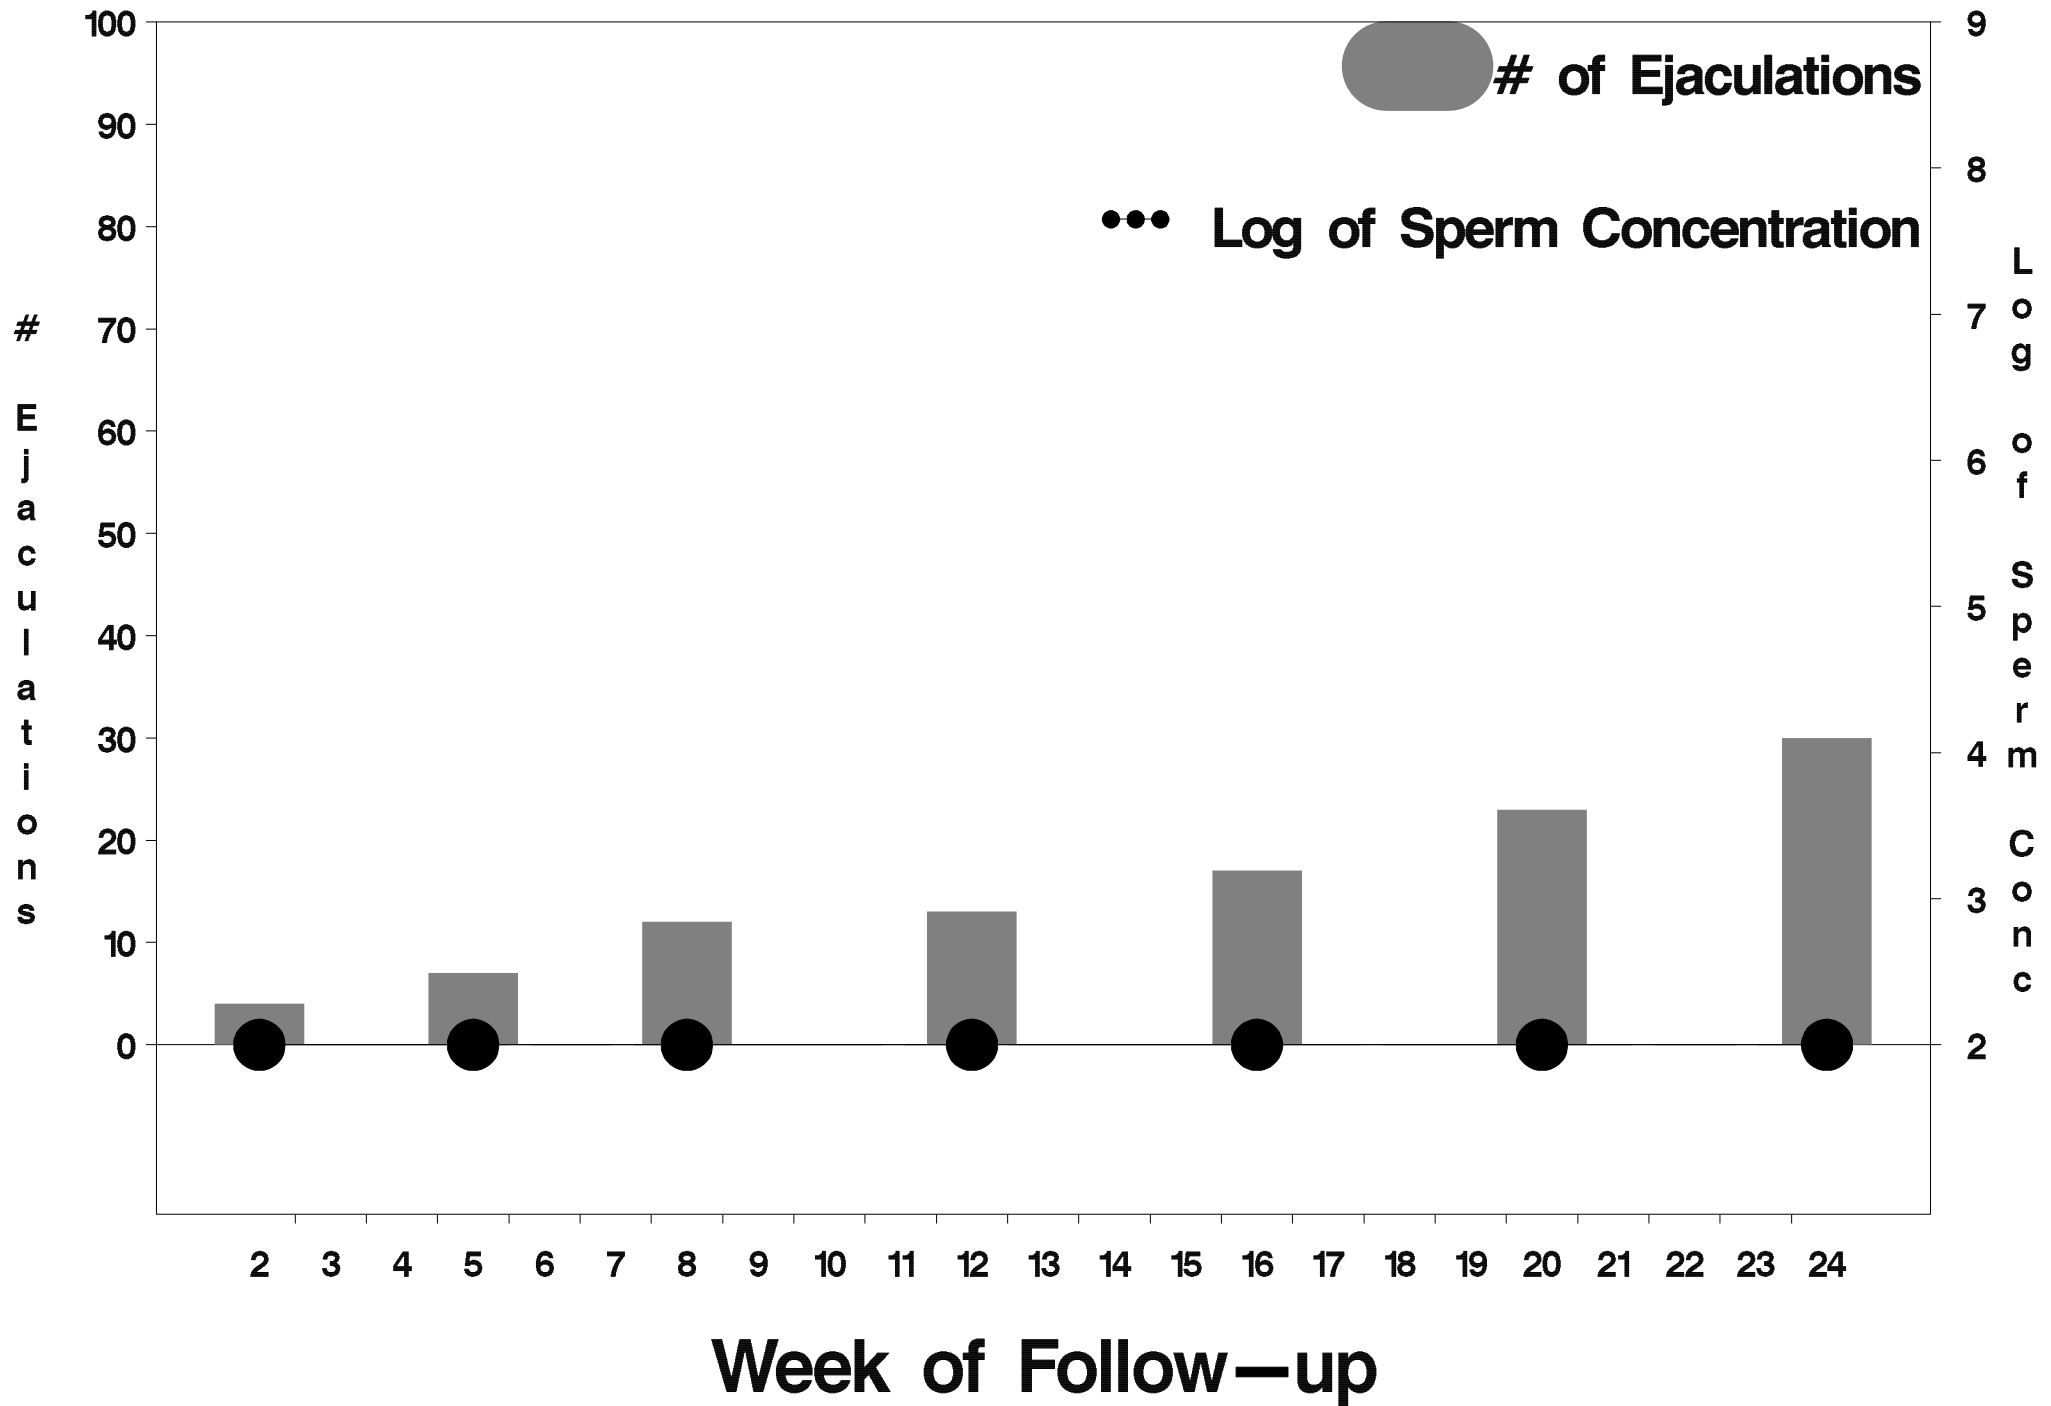

# Participant number= 355

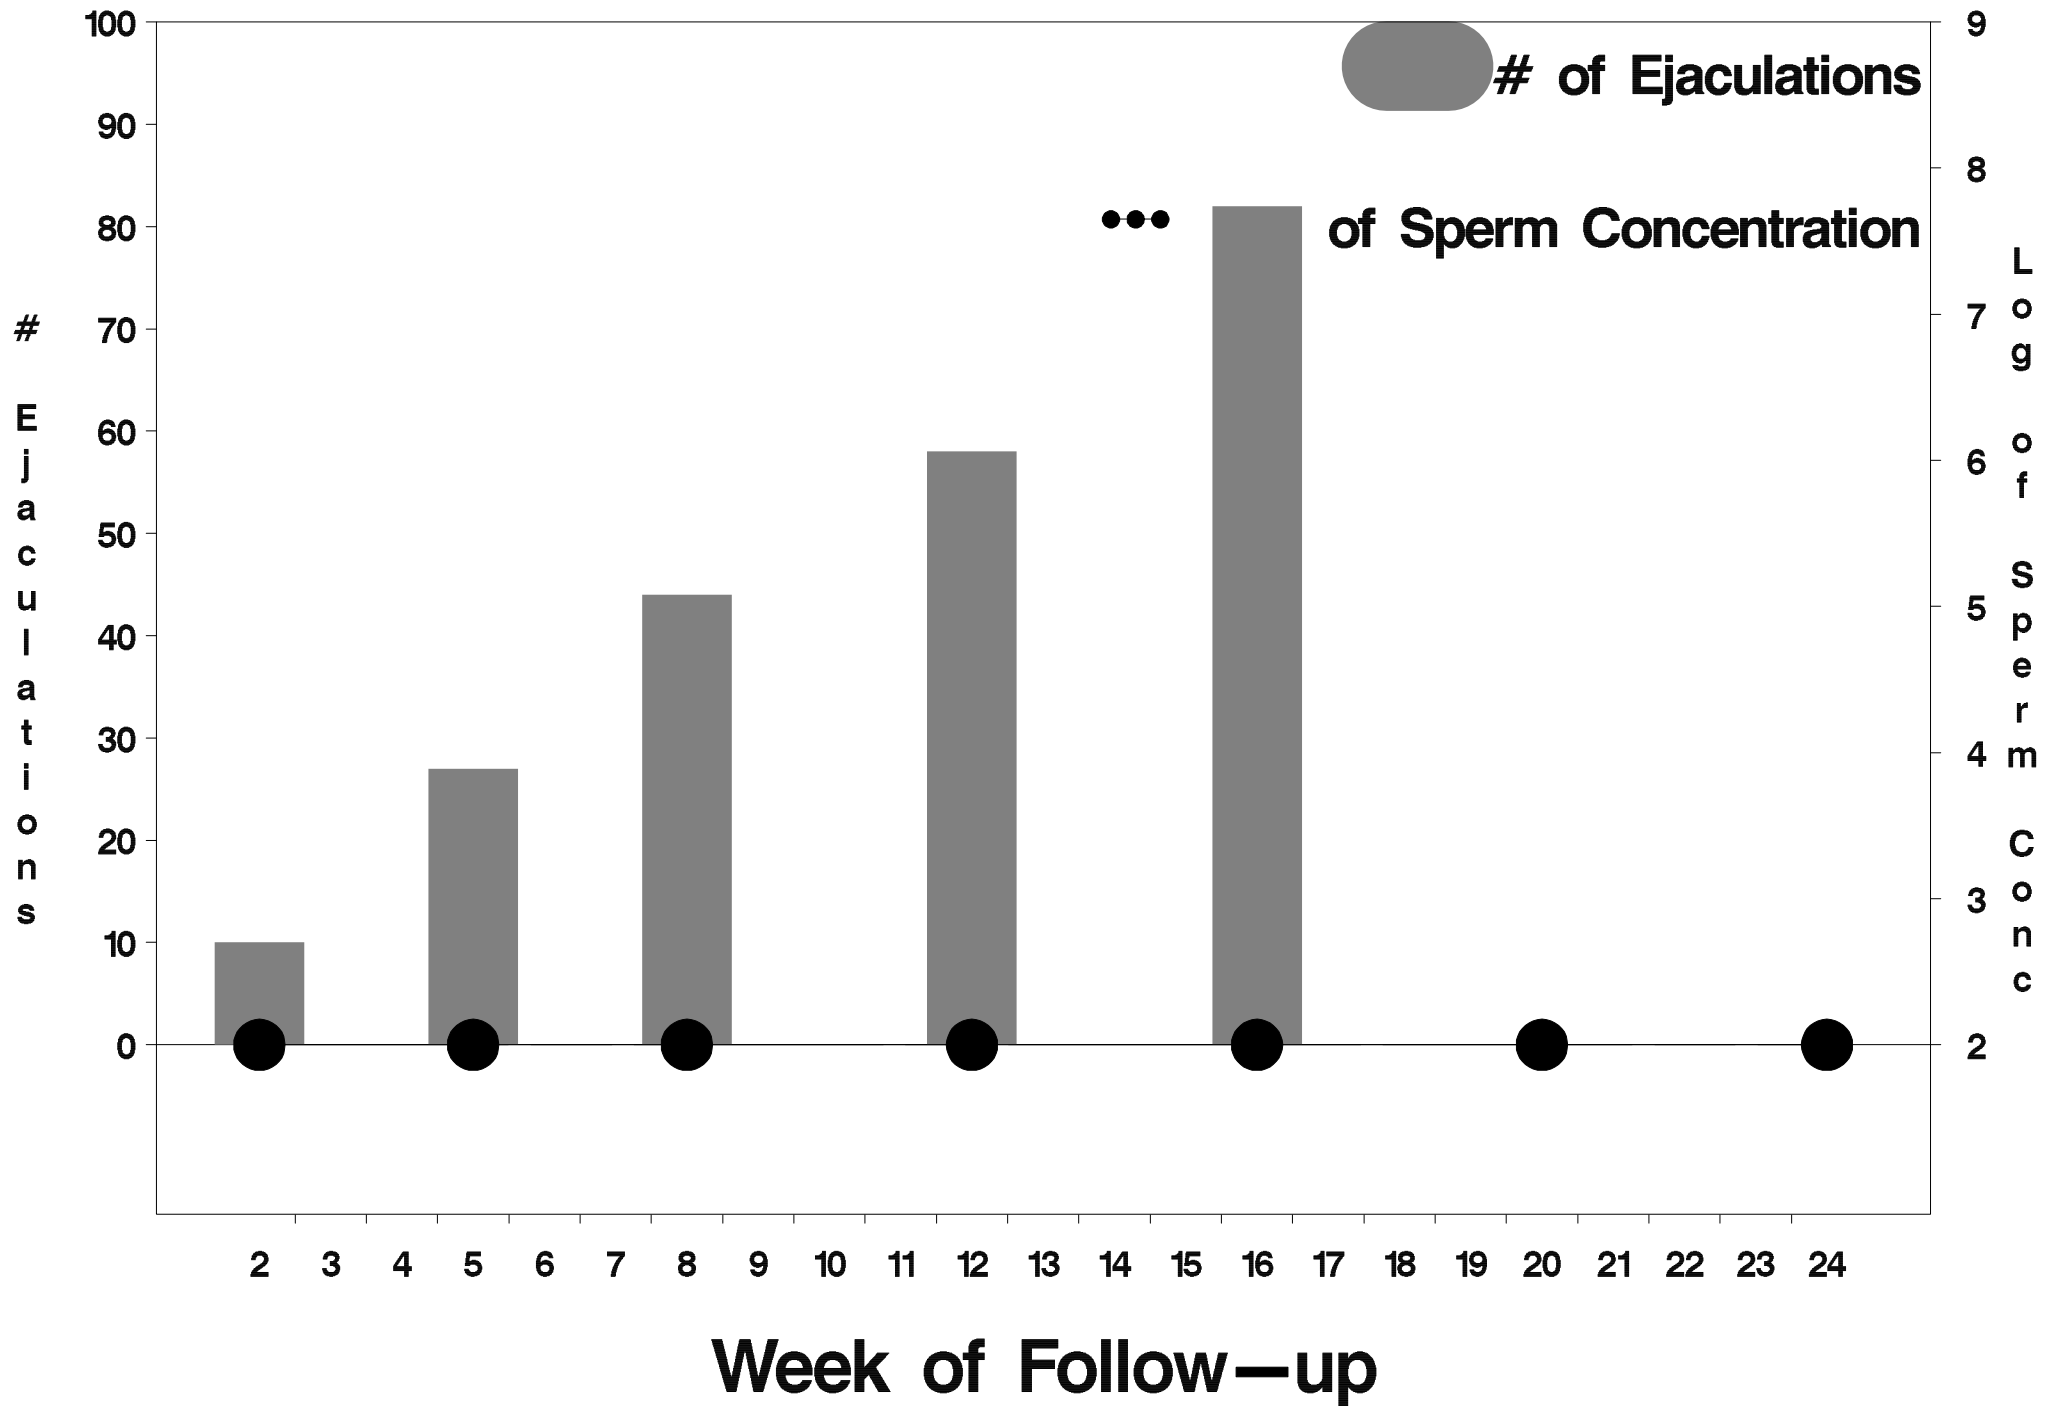

# Participant number= 356

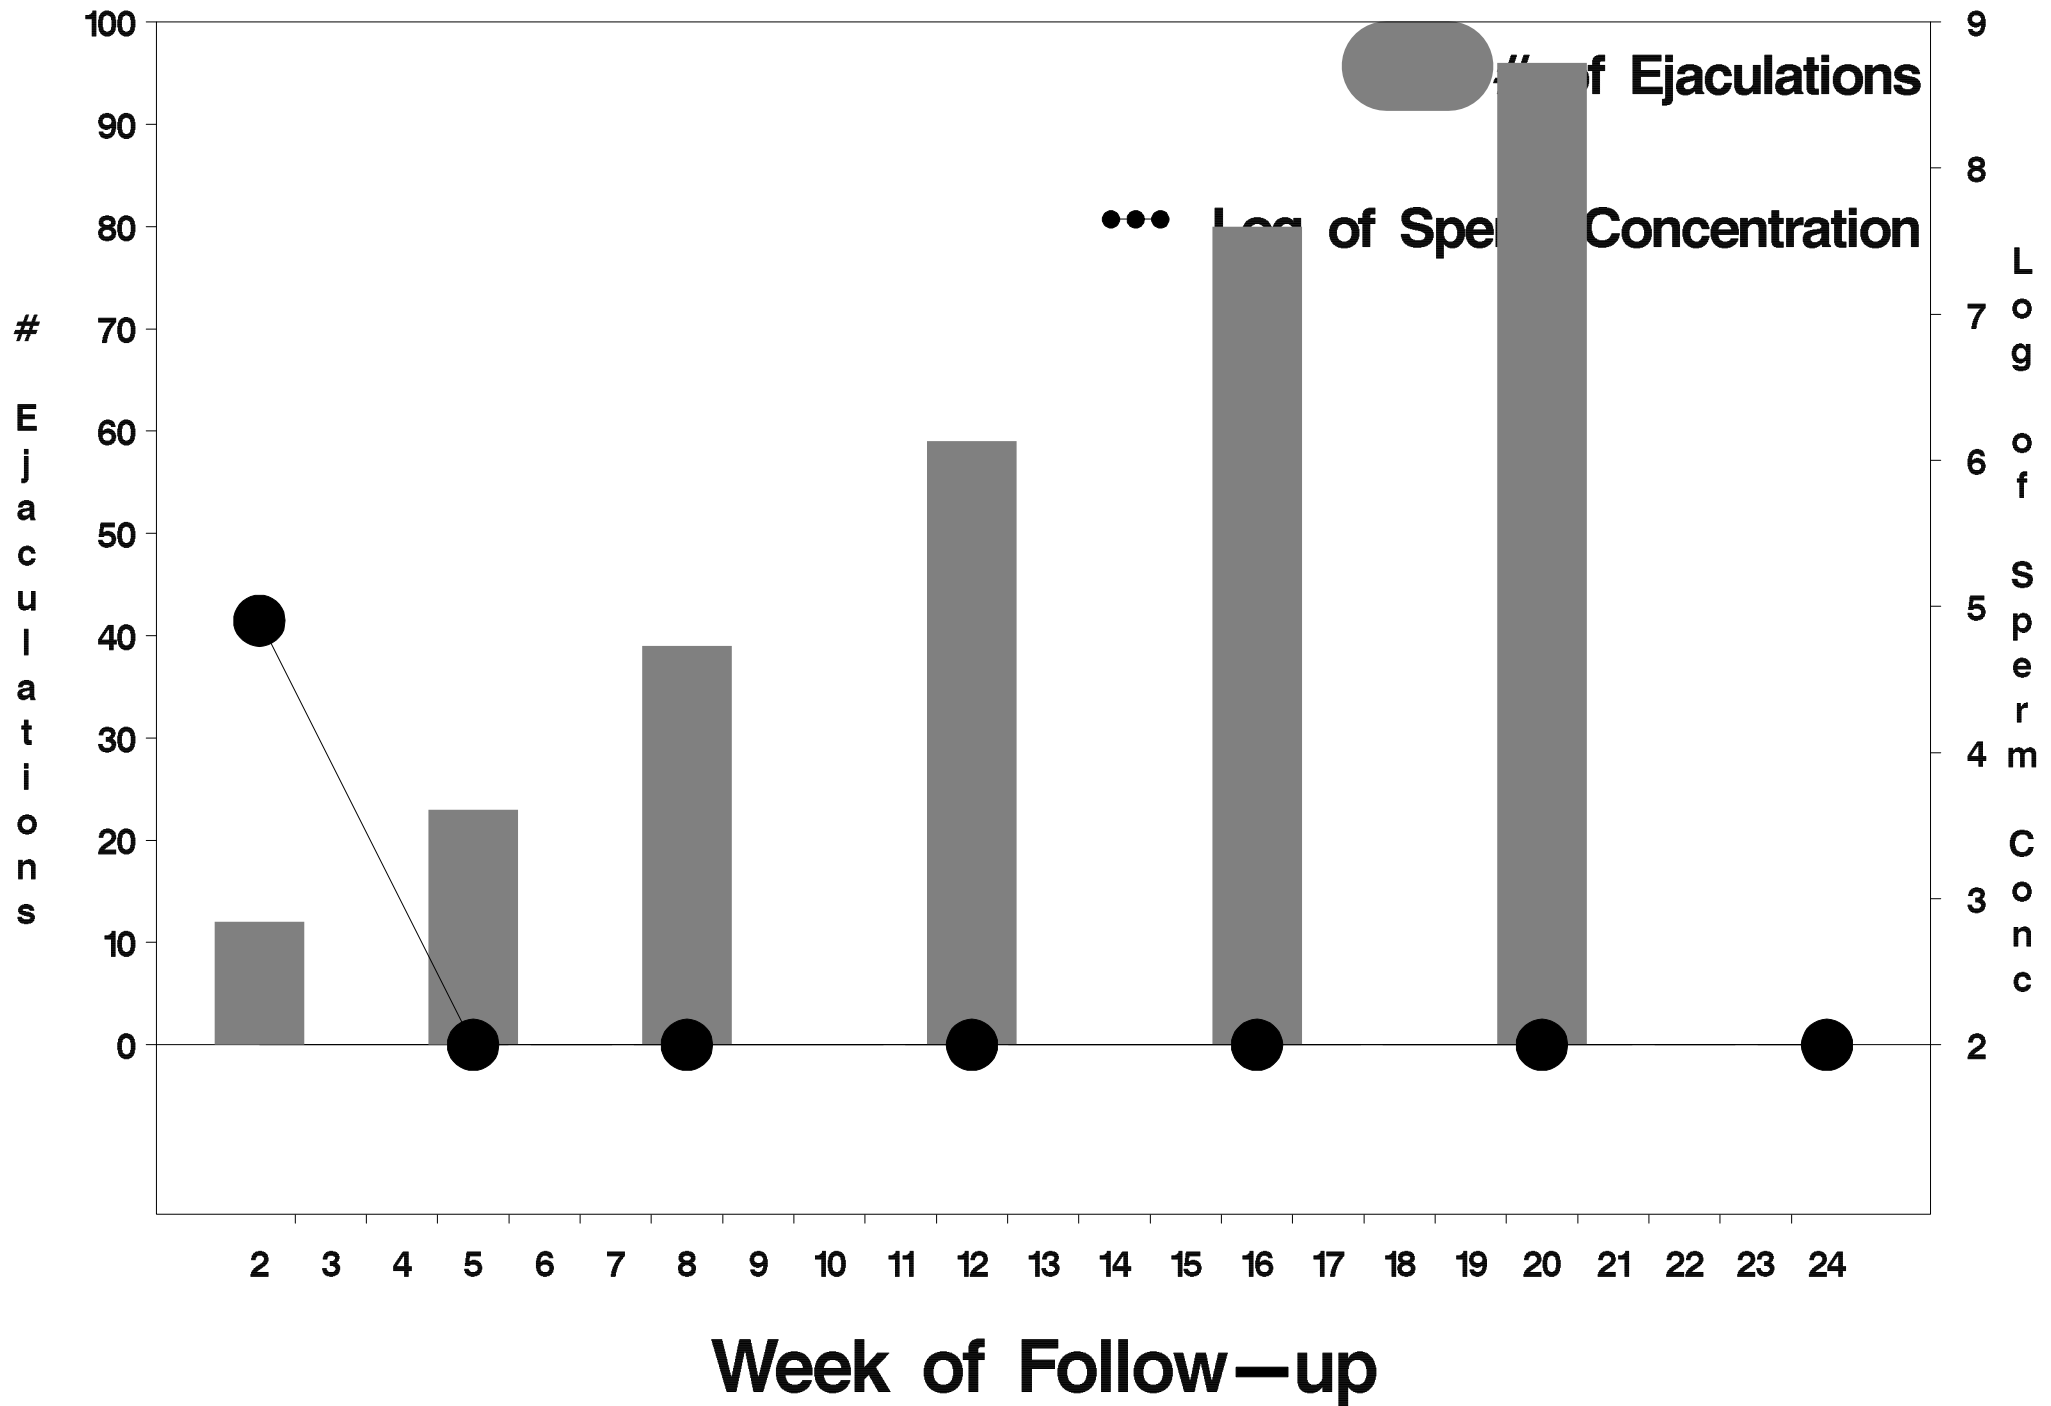

# Participant number= 357

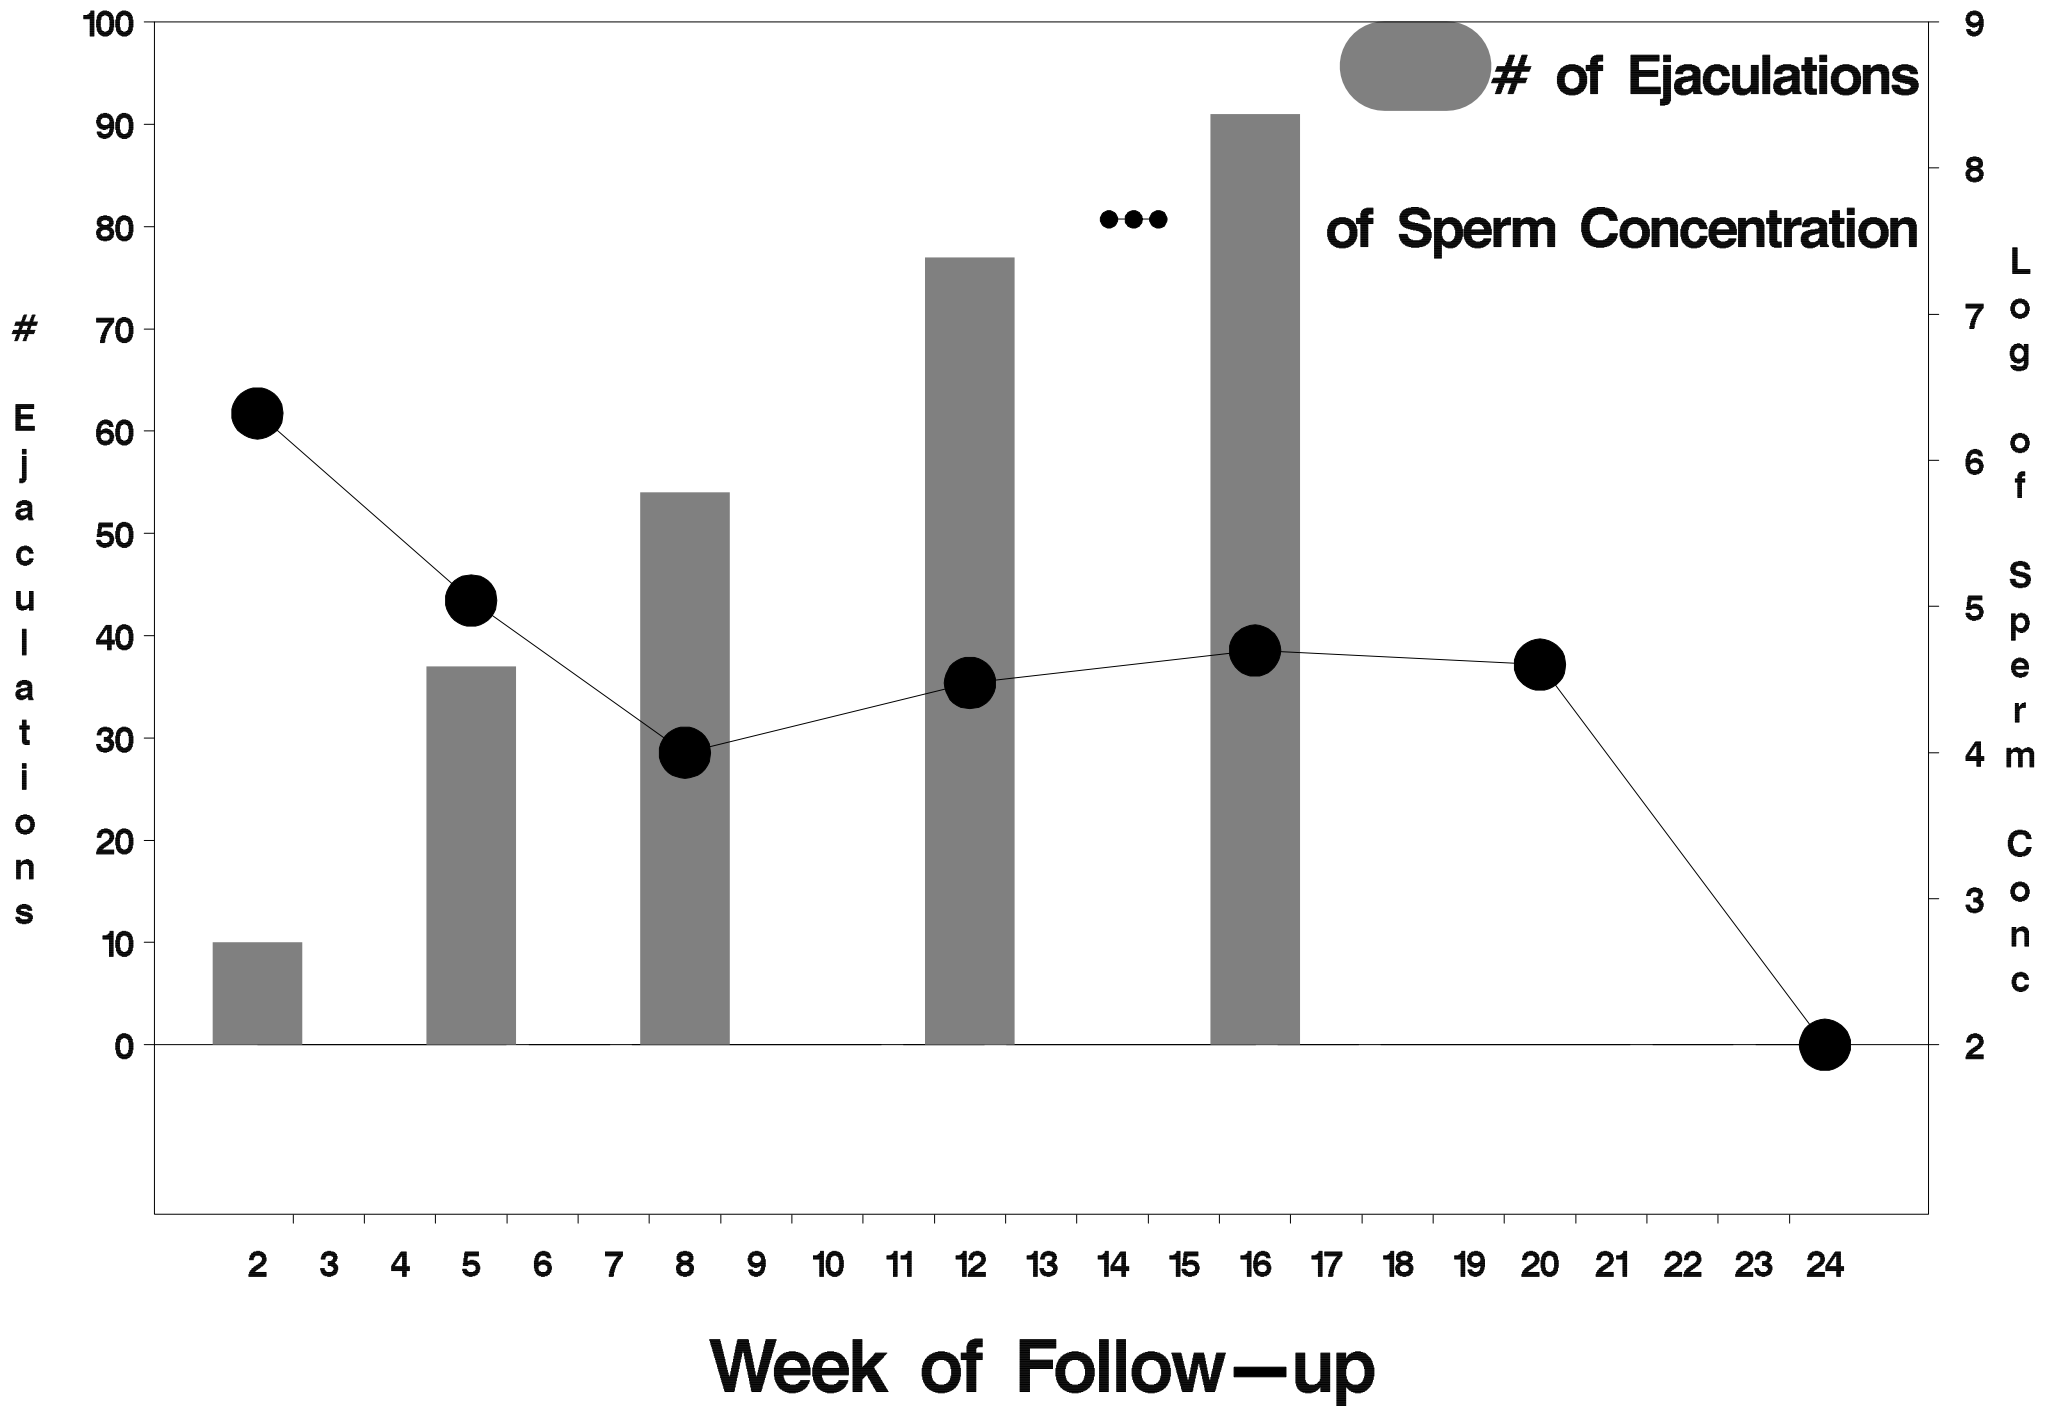

# Participant number= 358

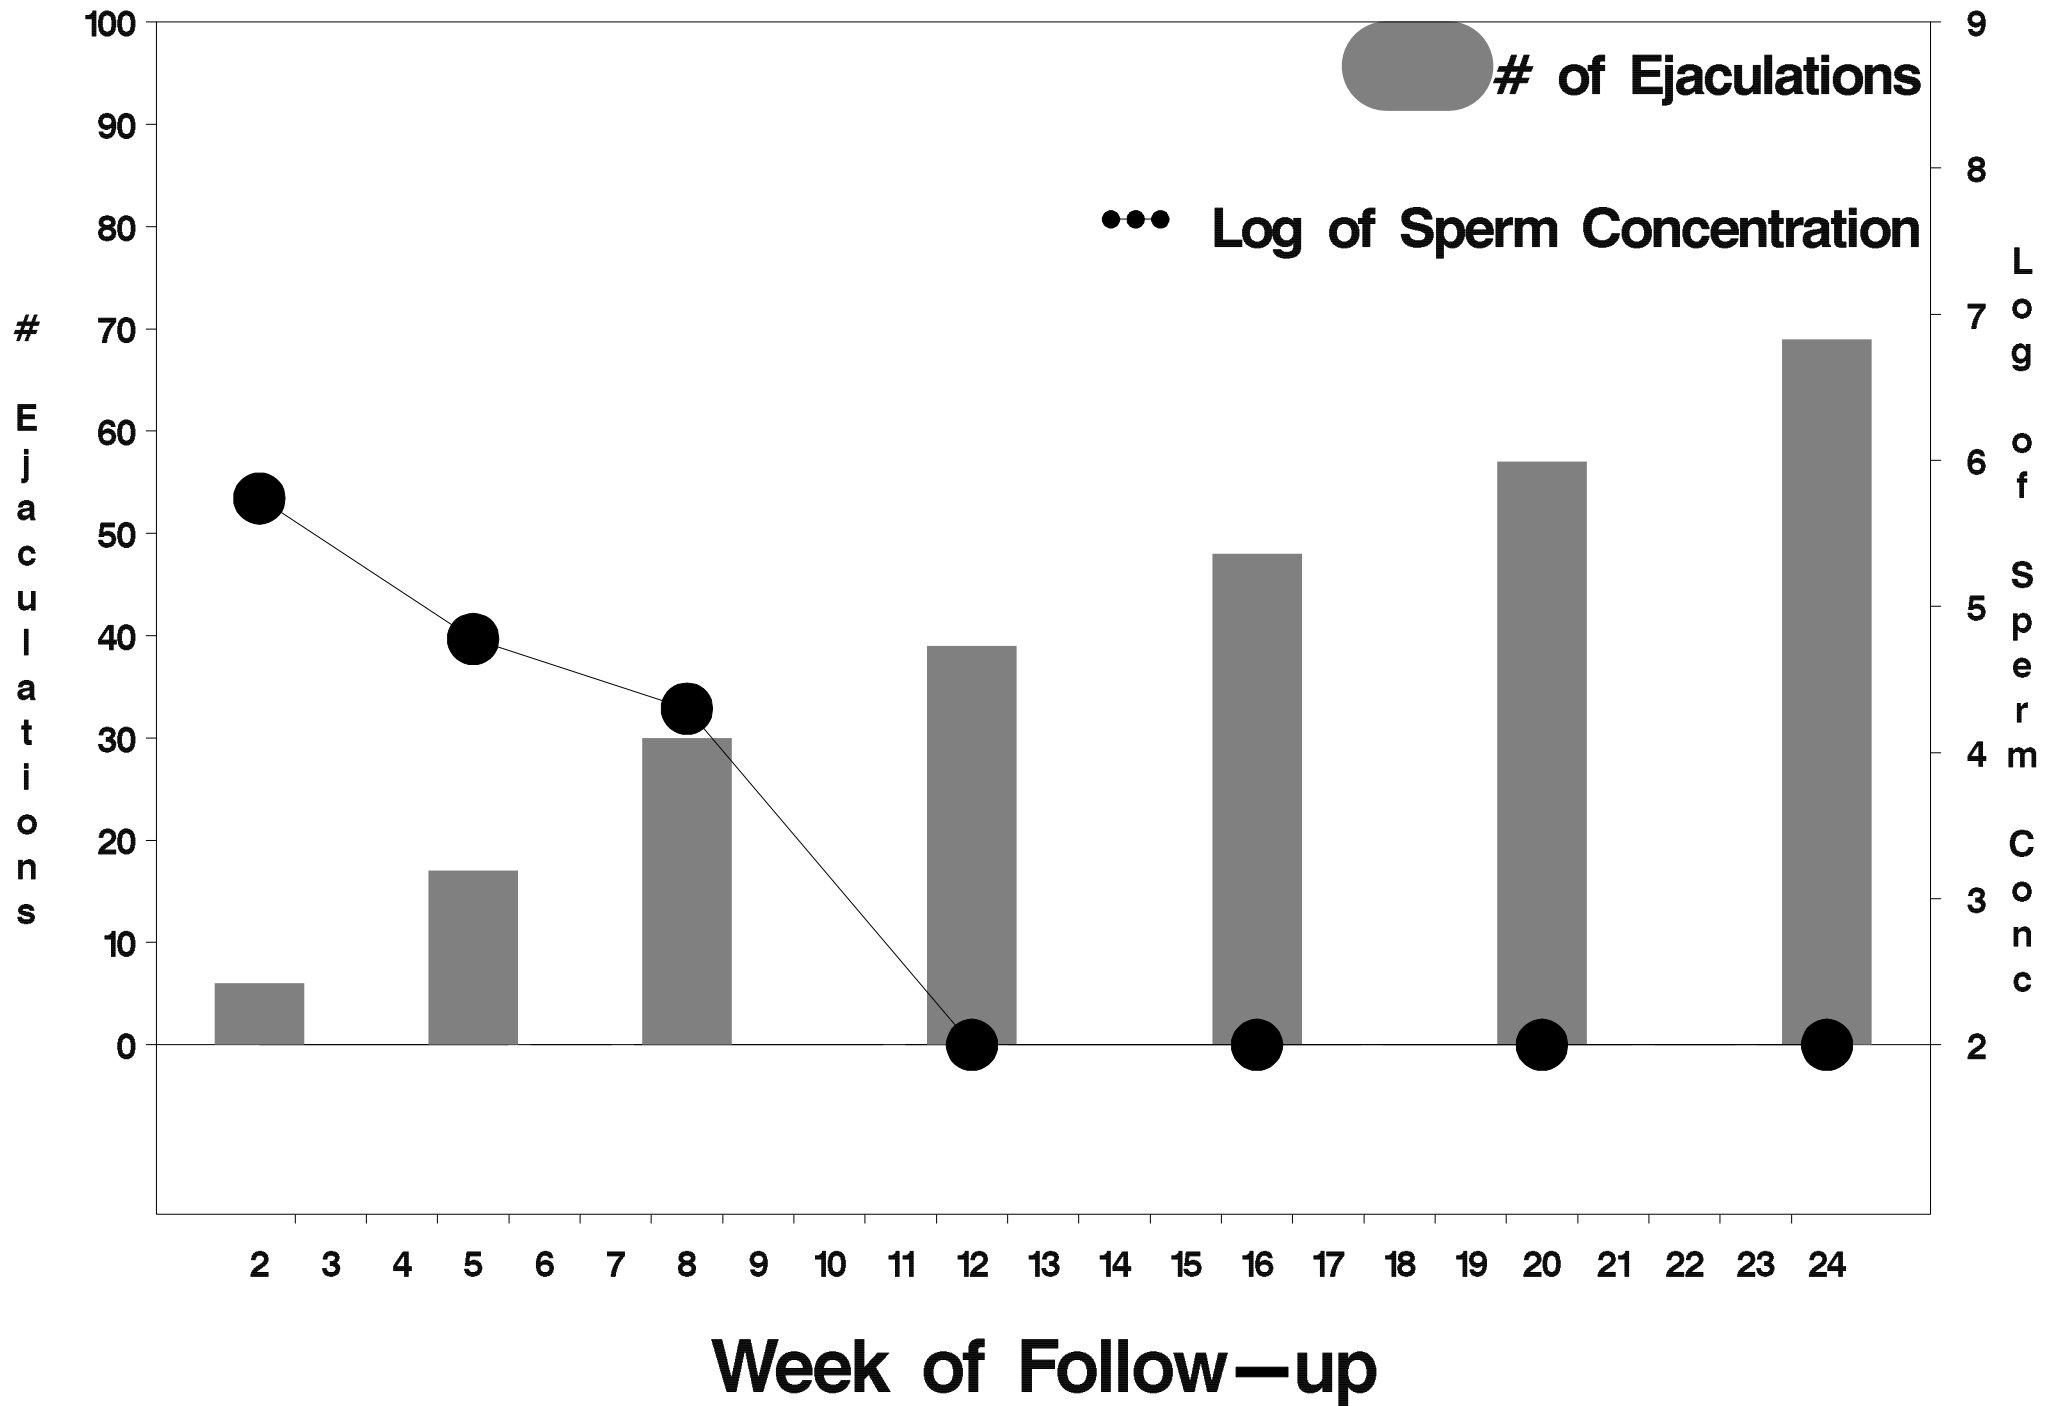

# Participant number= 359

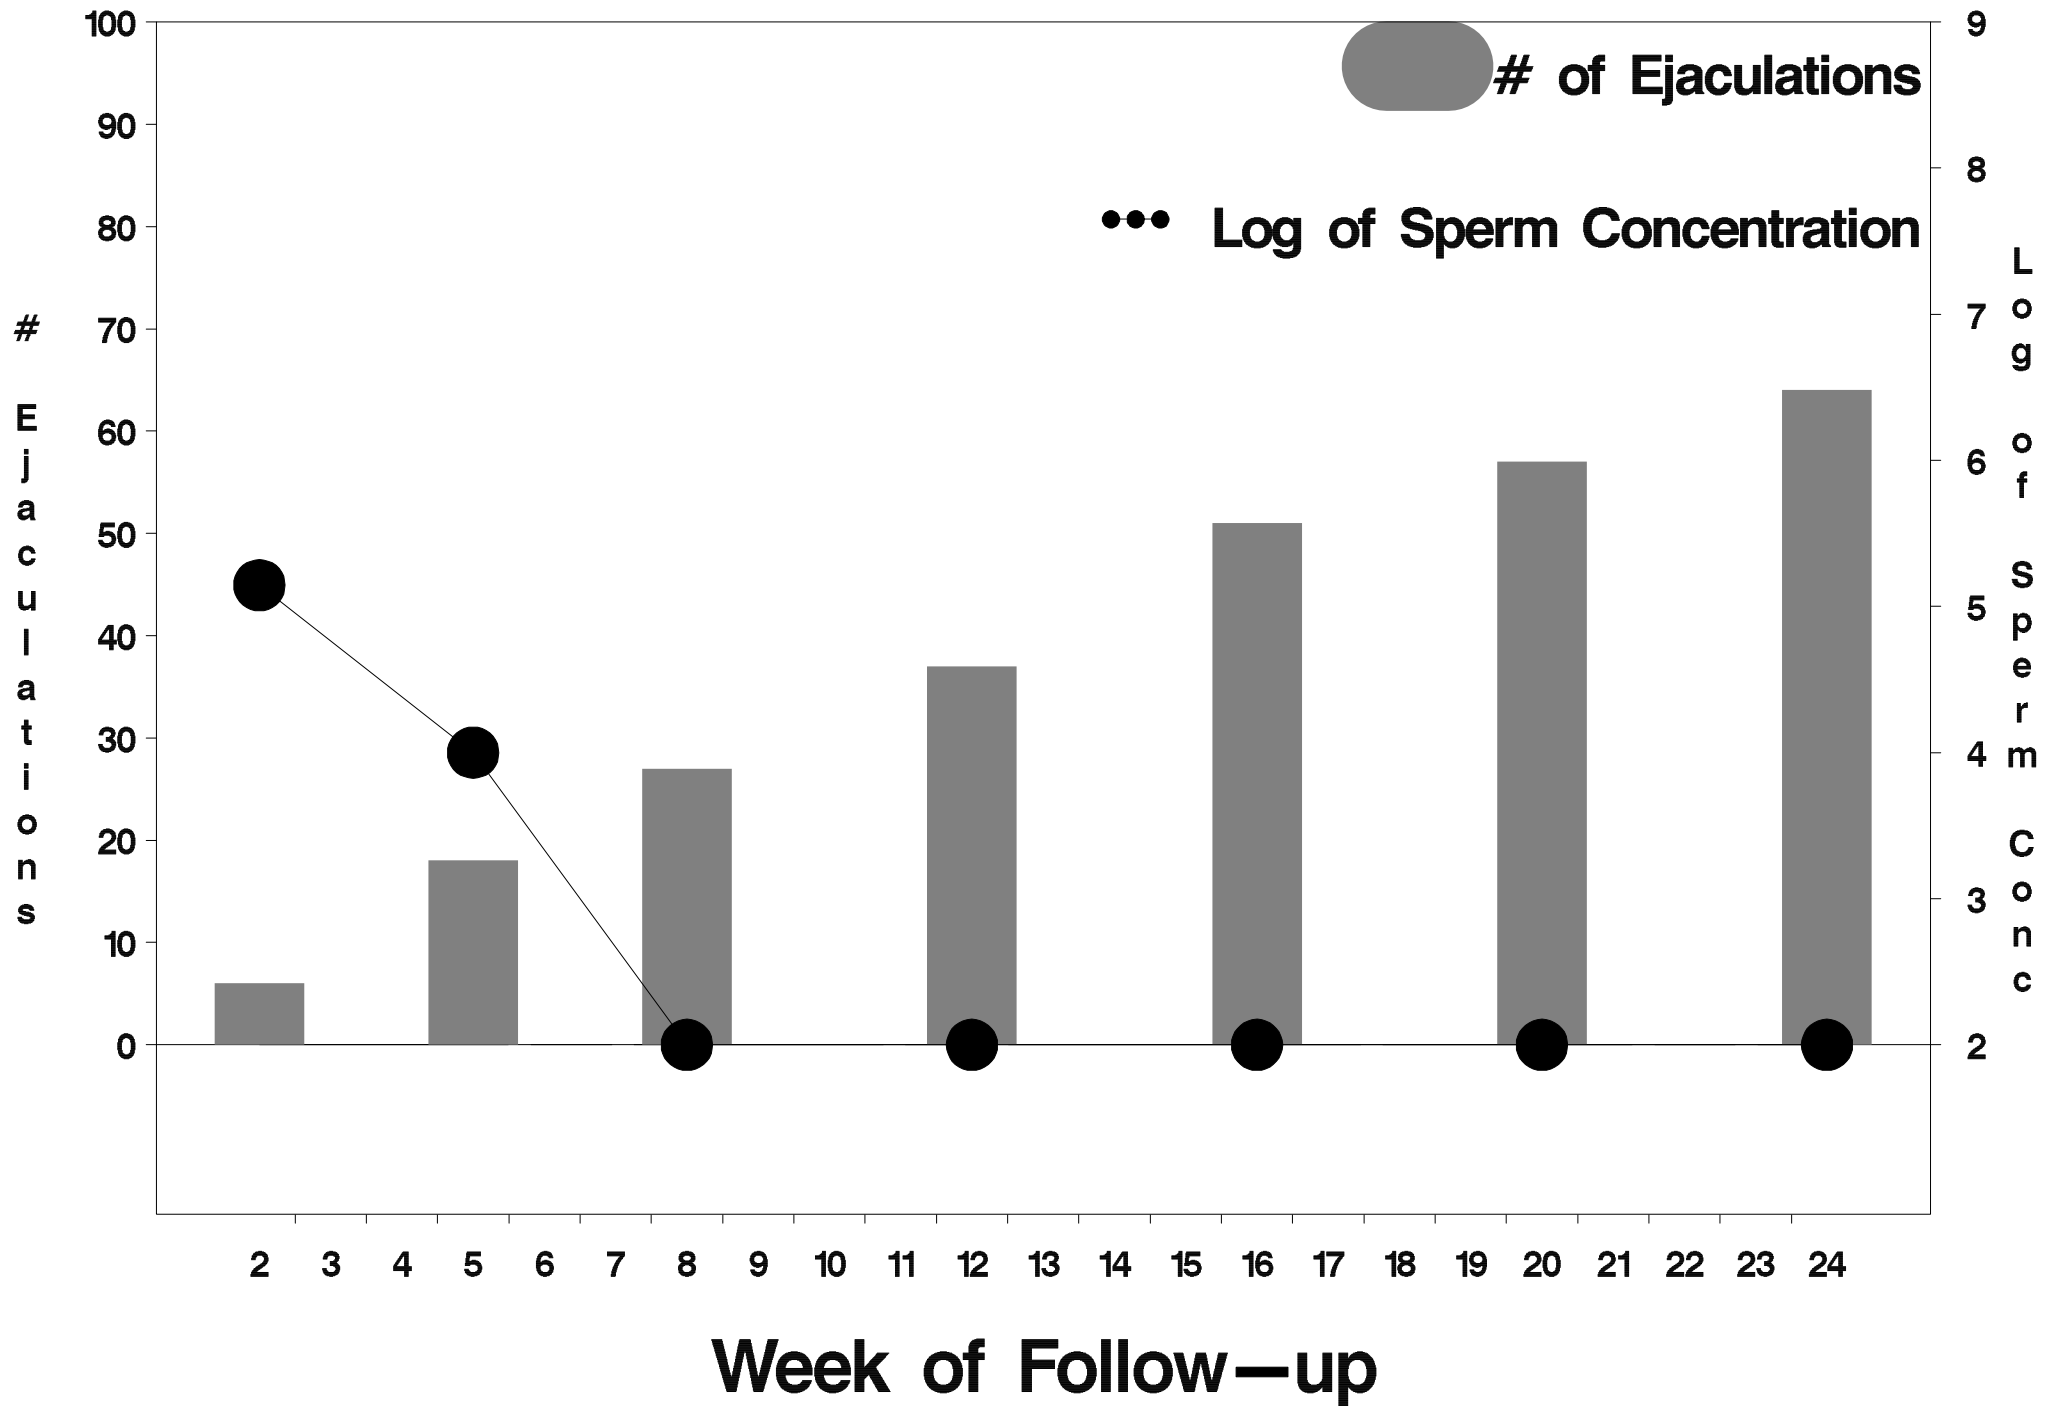

# Participant number= 360

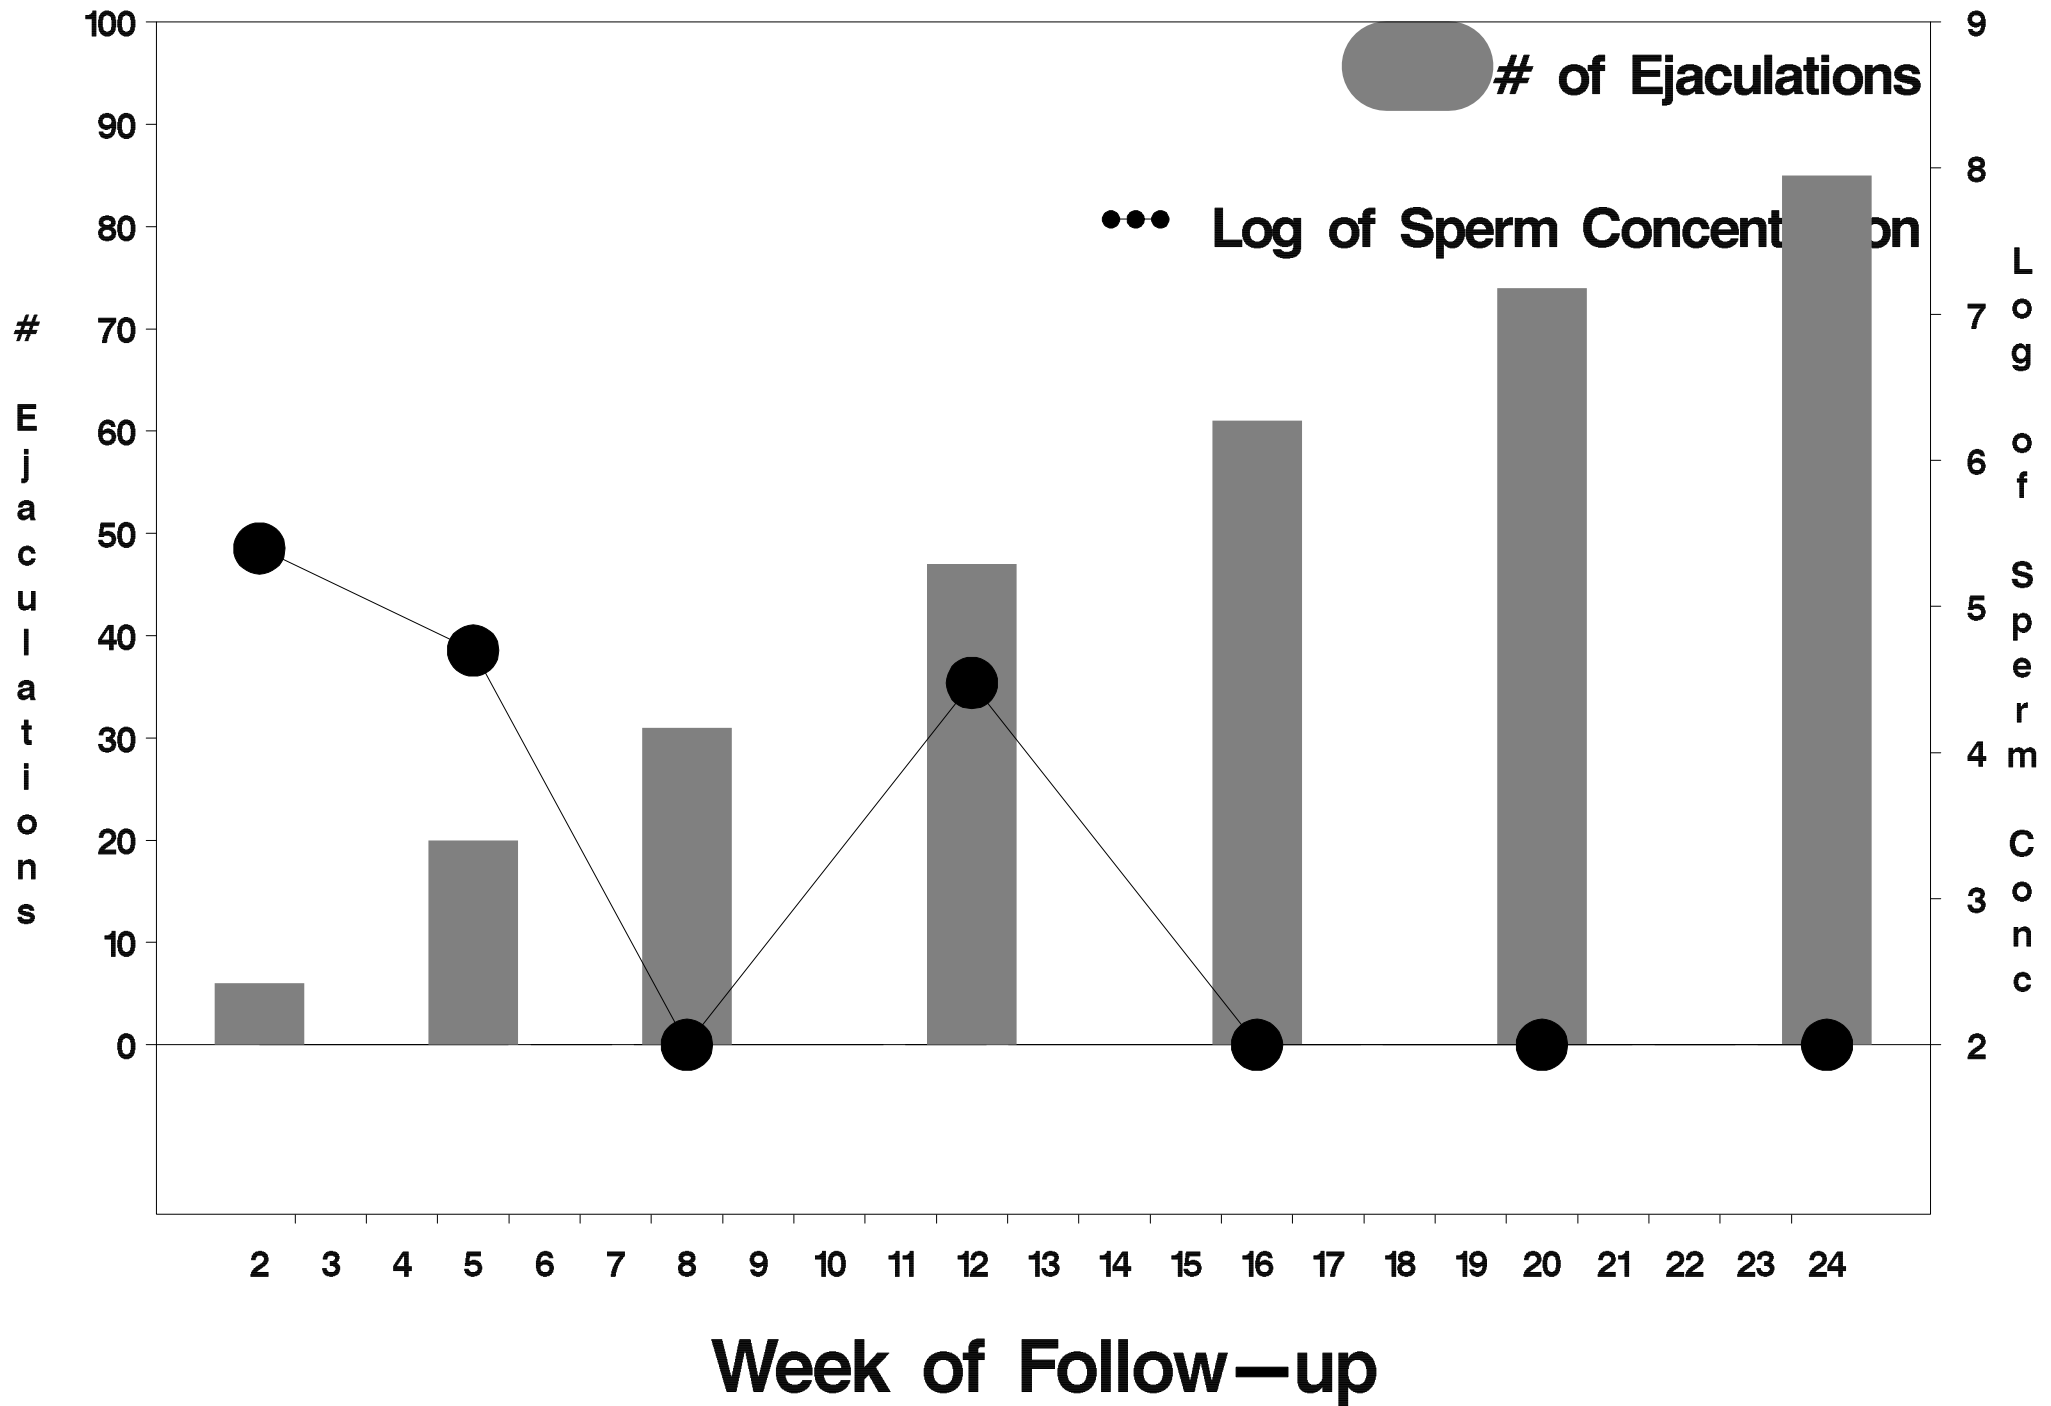

# Participant number= 361

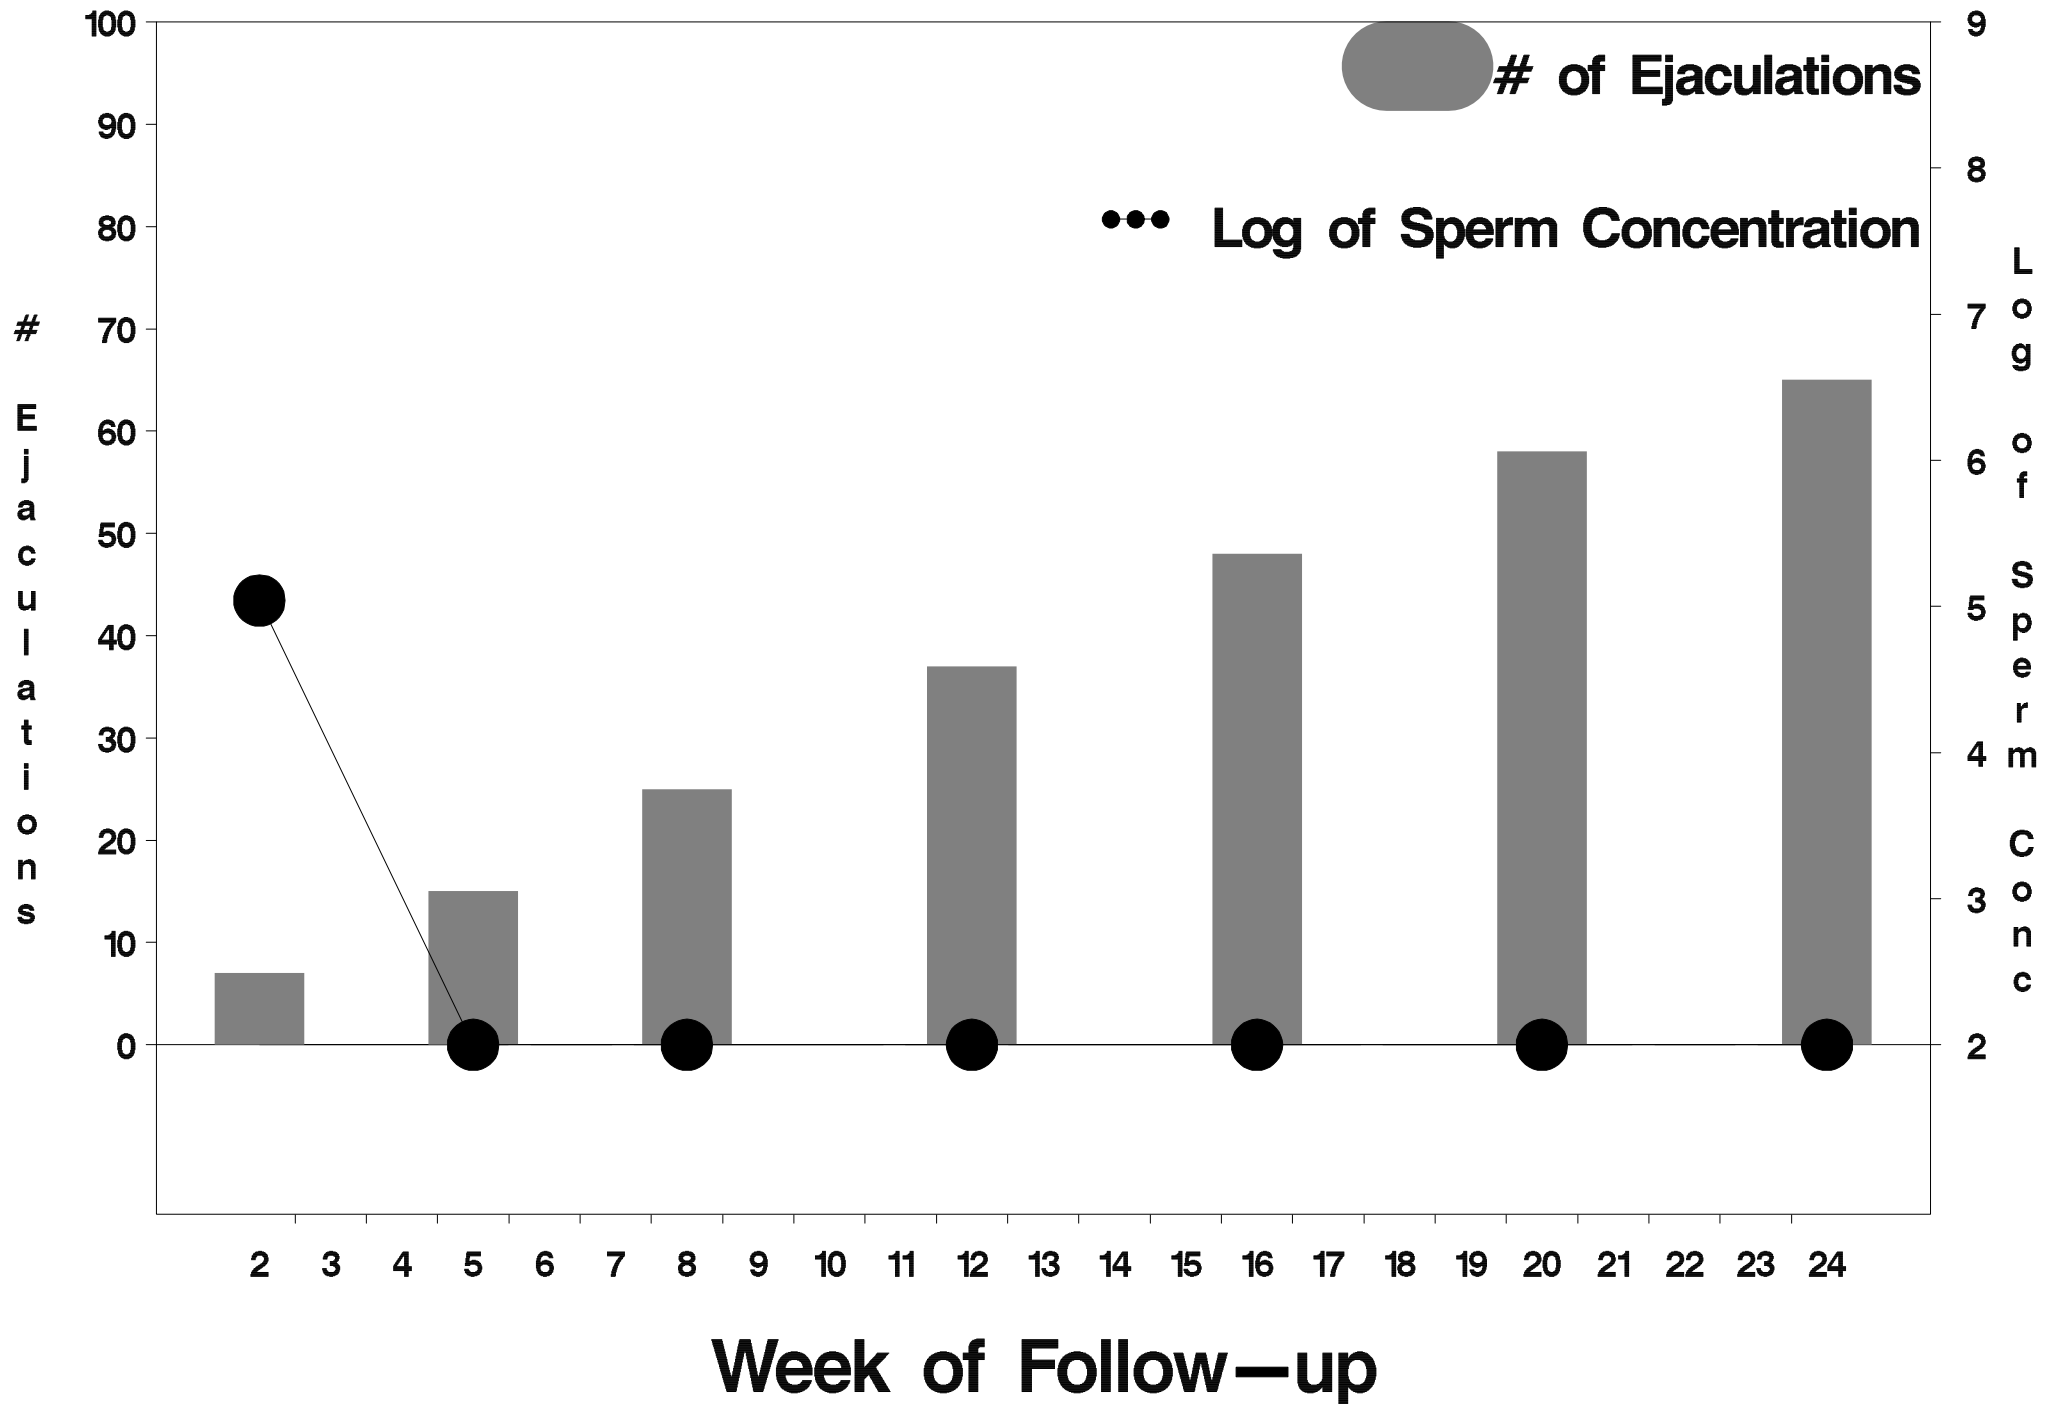



# Participant number= 362

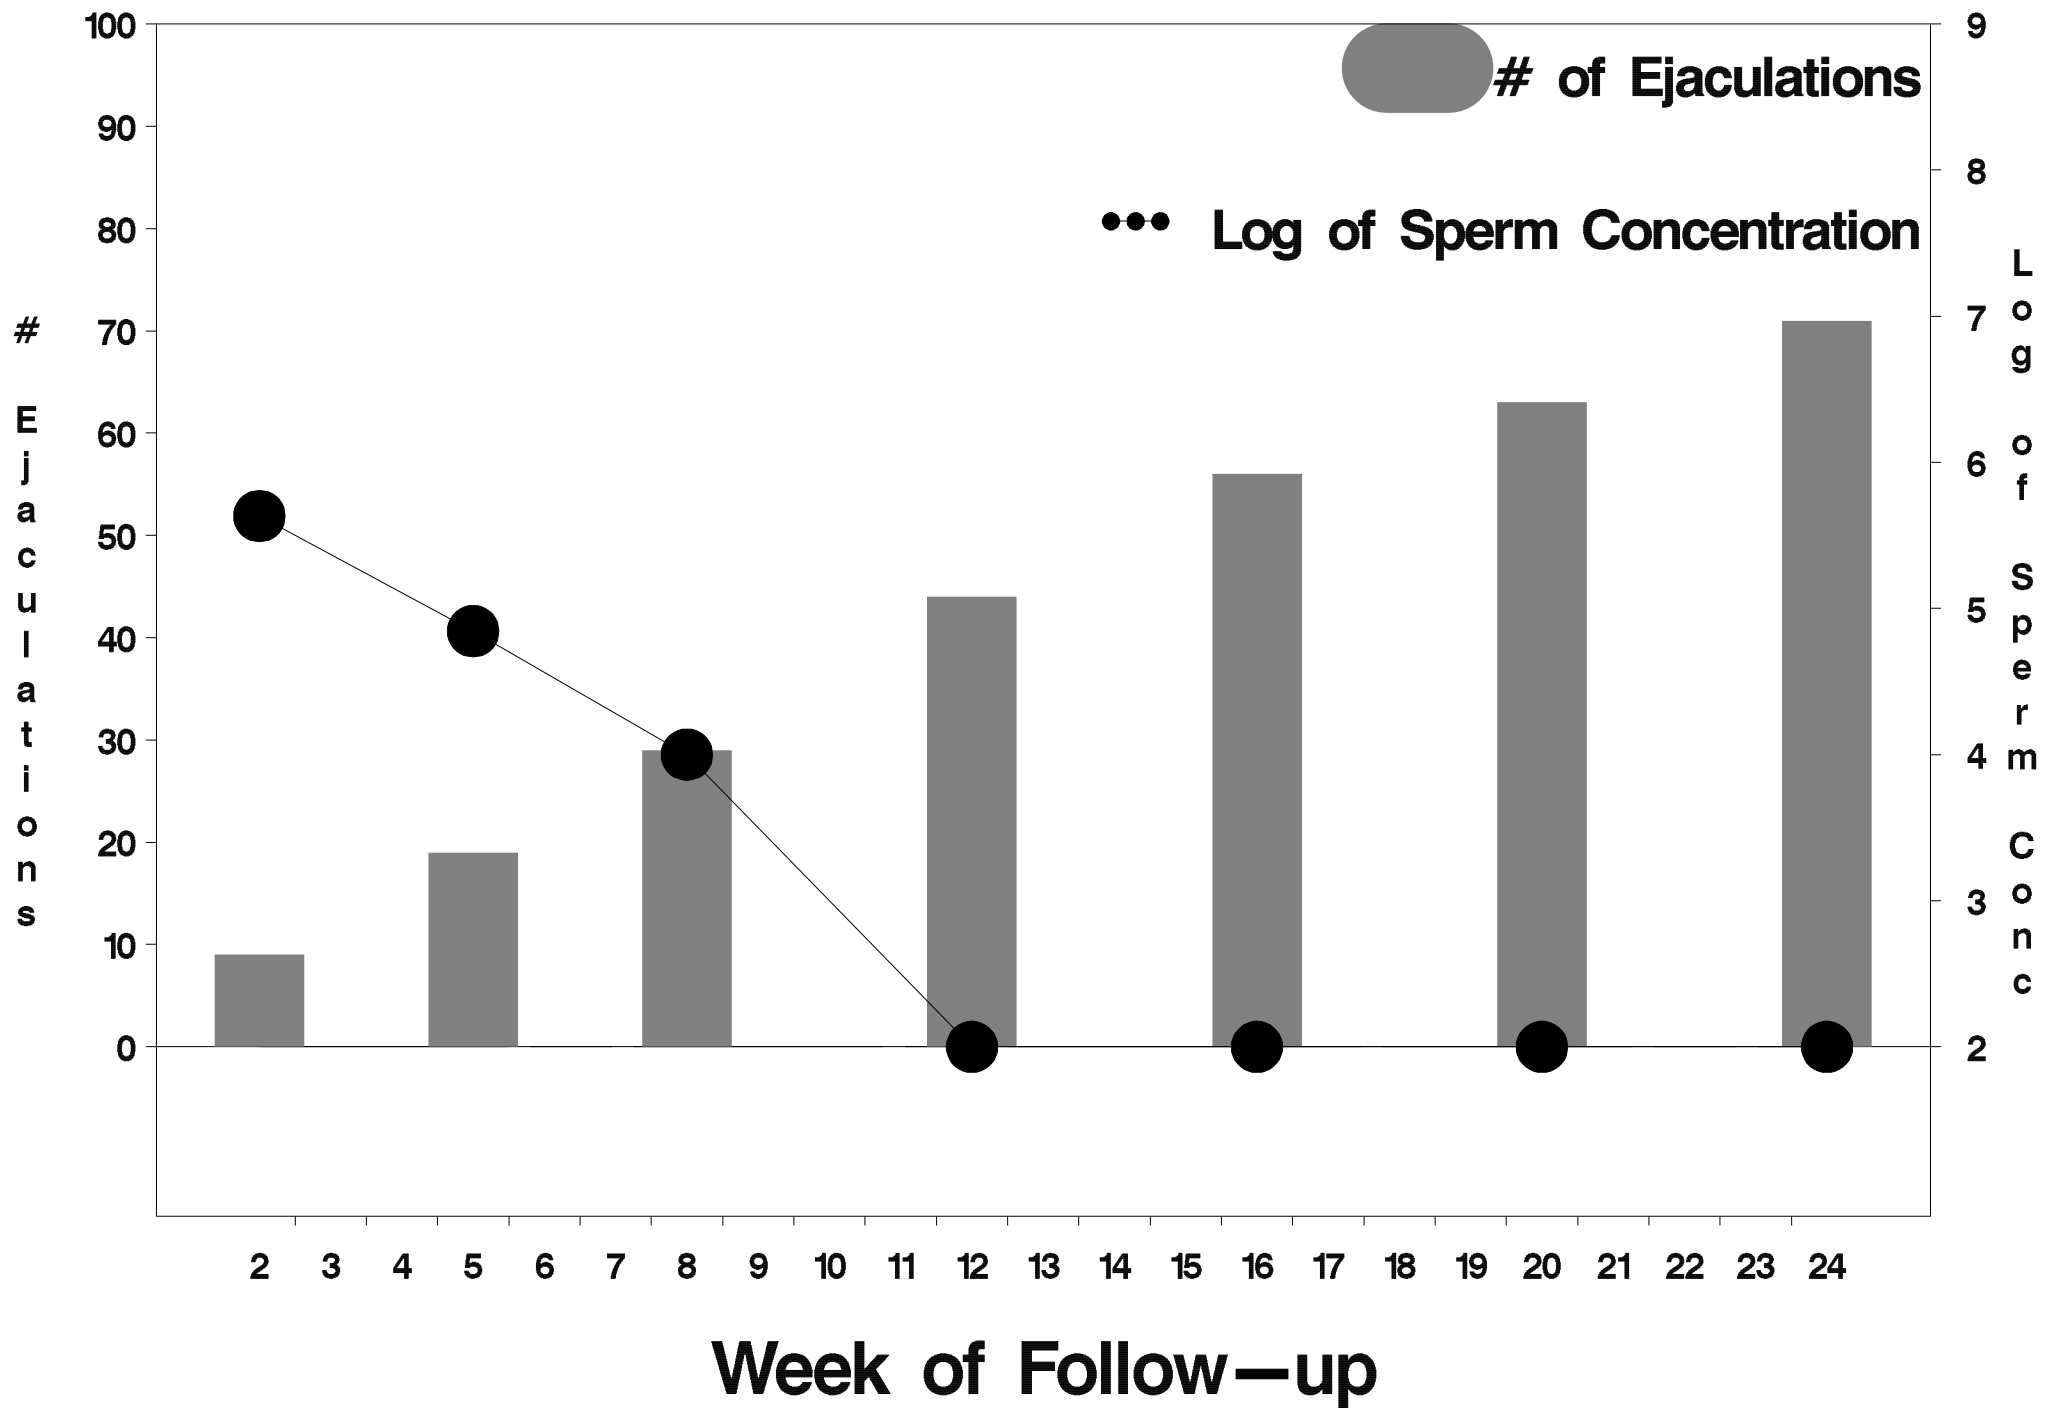

# Participant number= 363

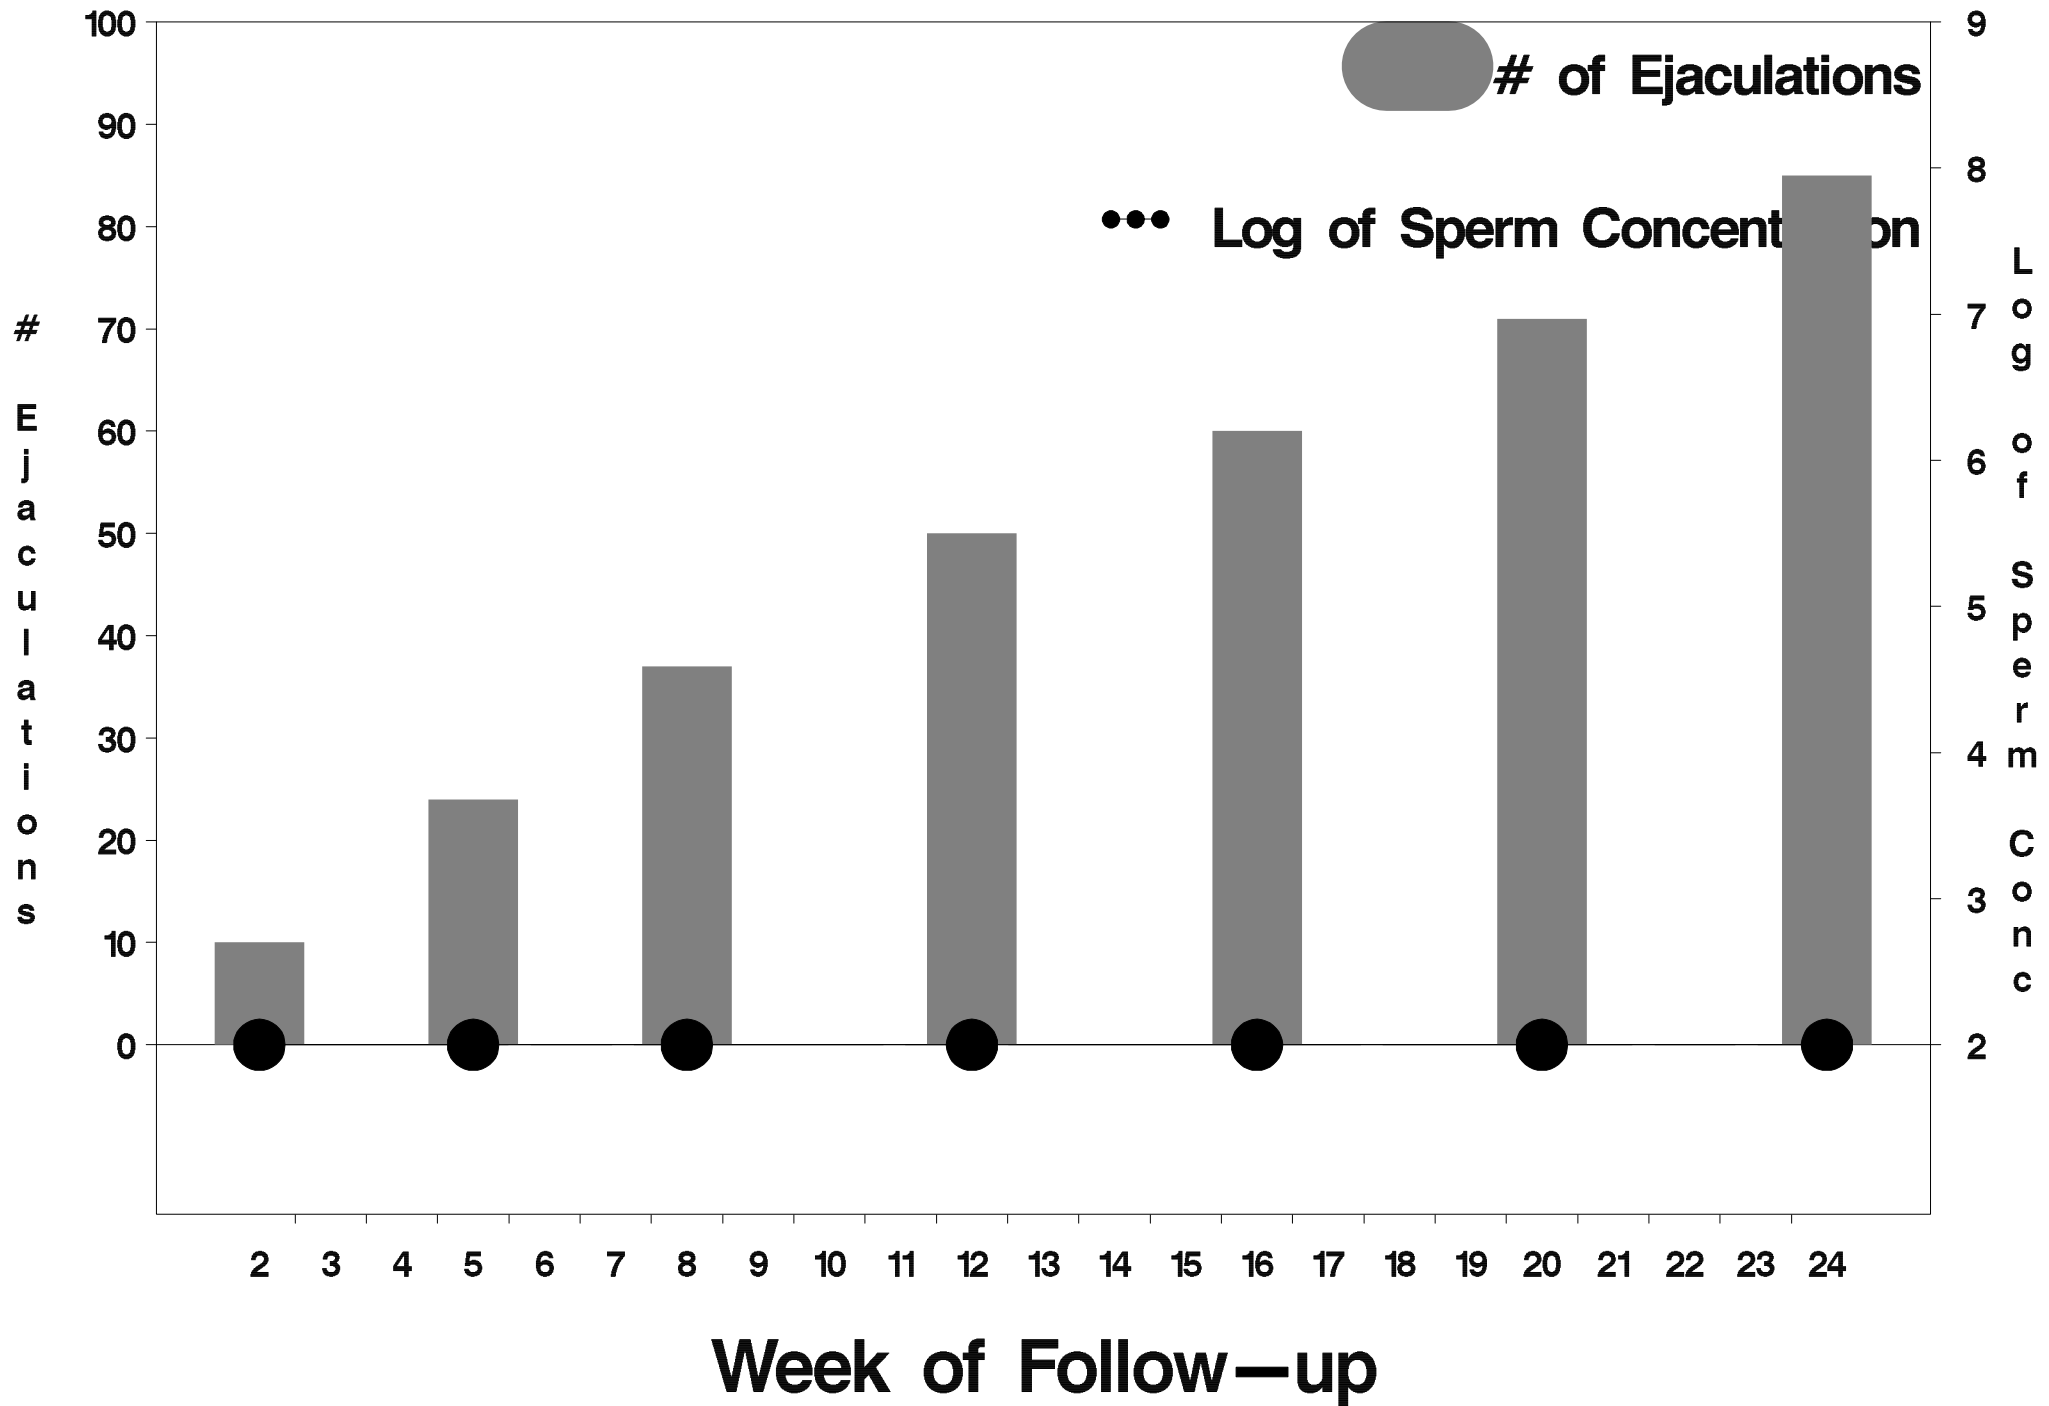

# Participant number= 364

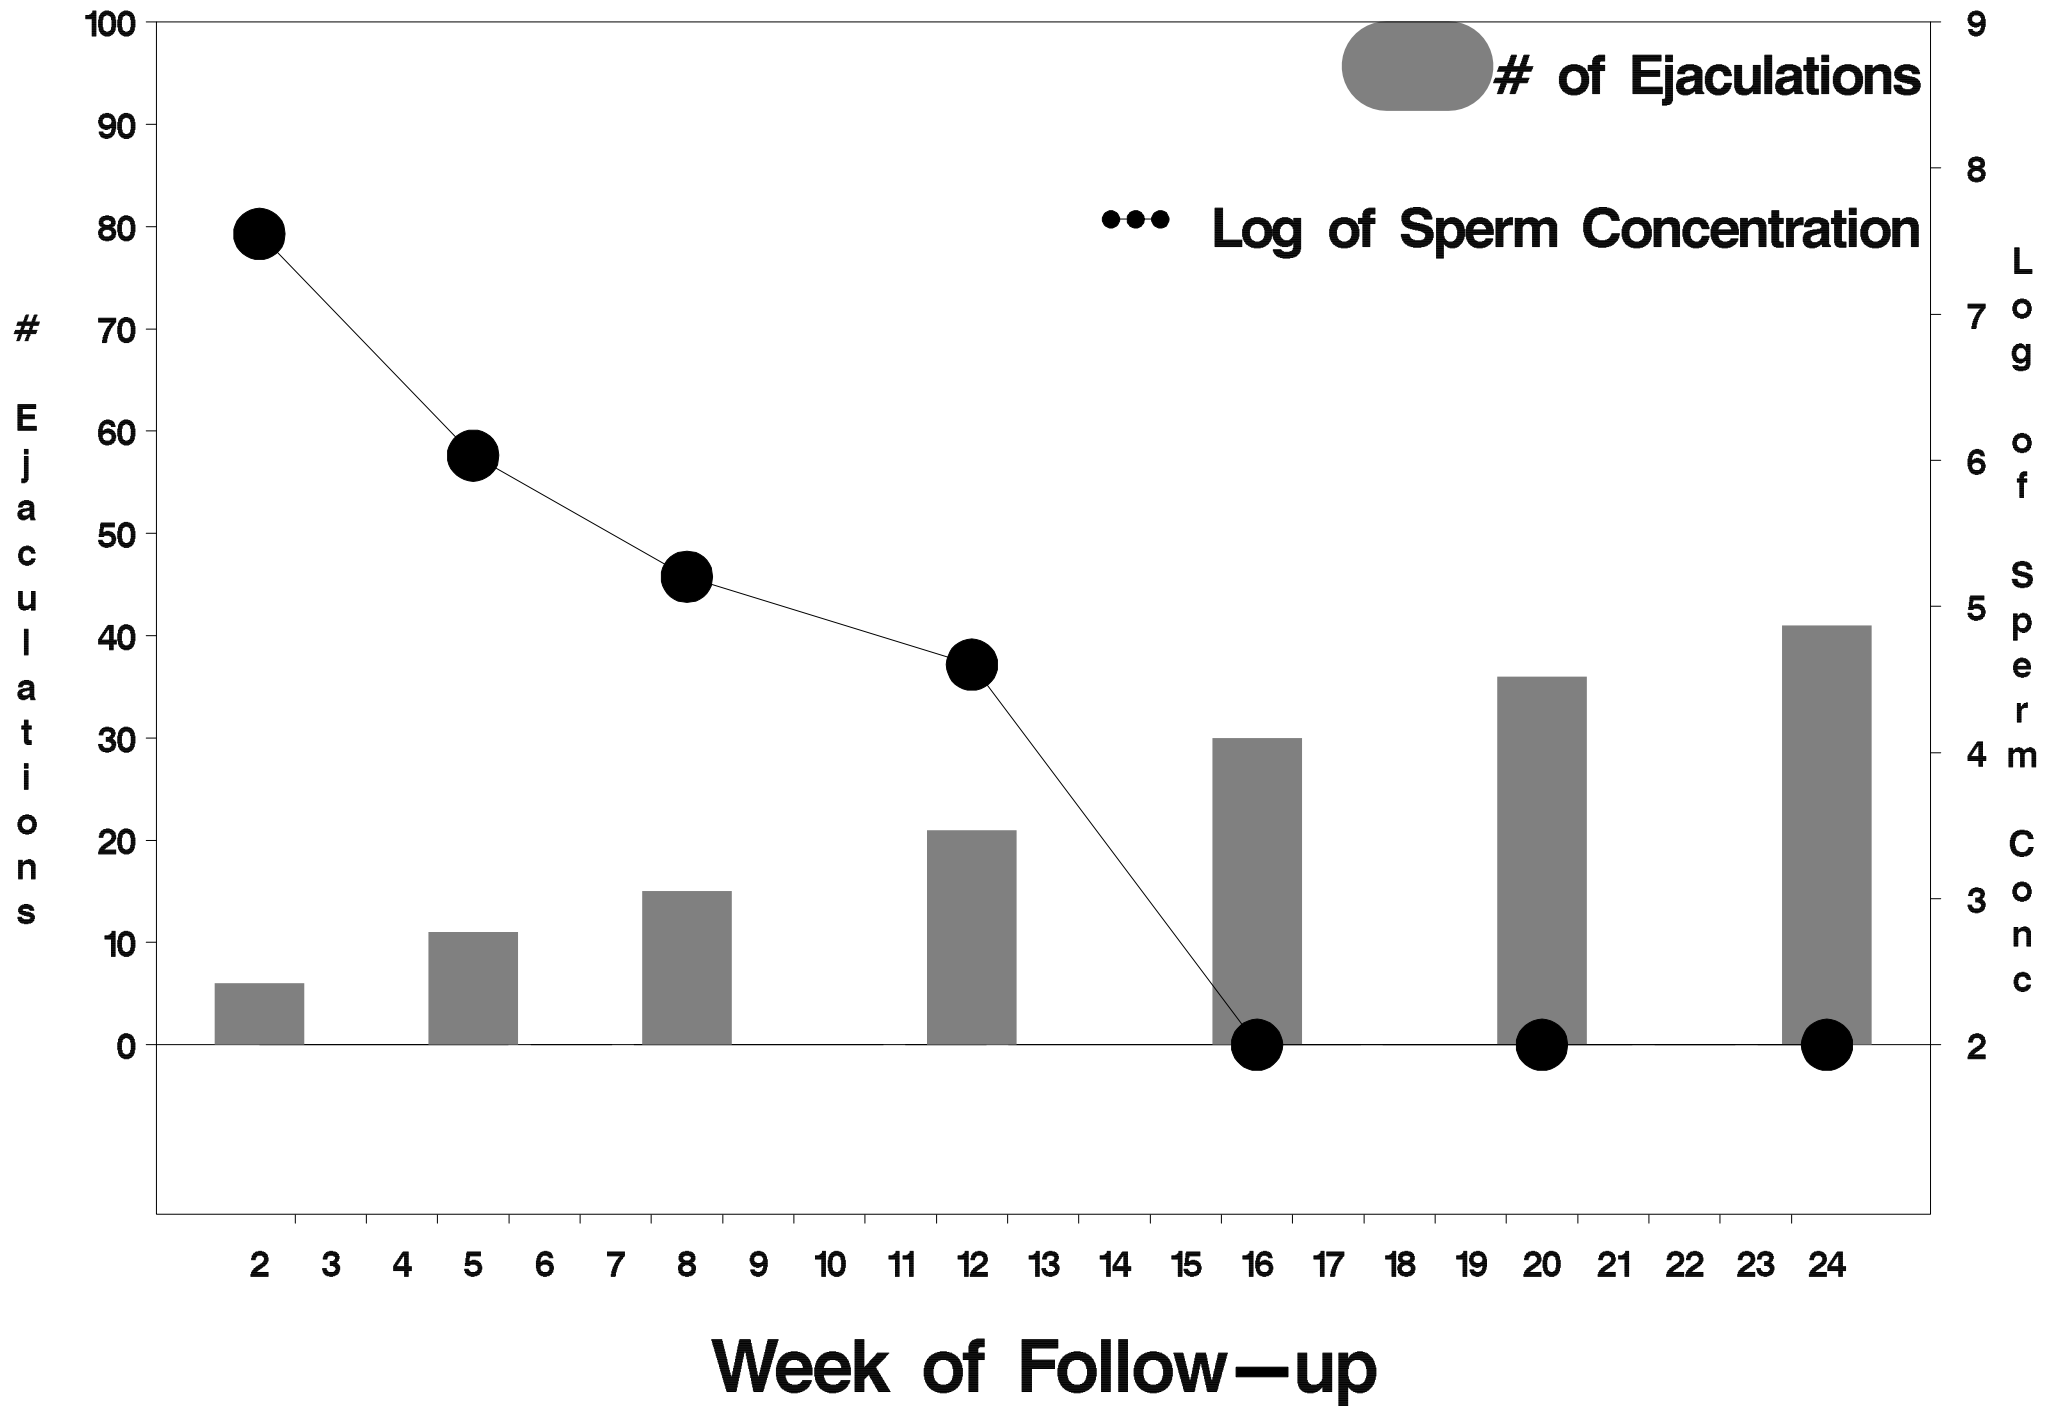

# Participant number= 365

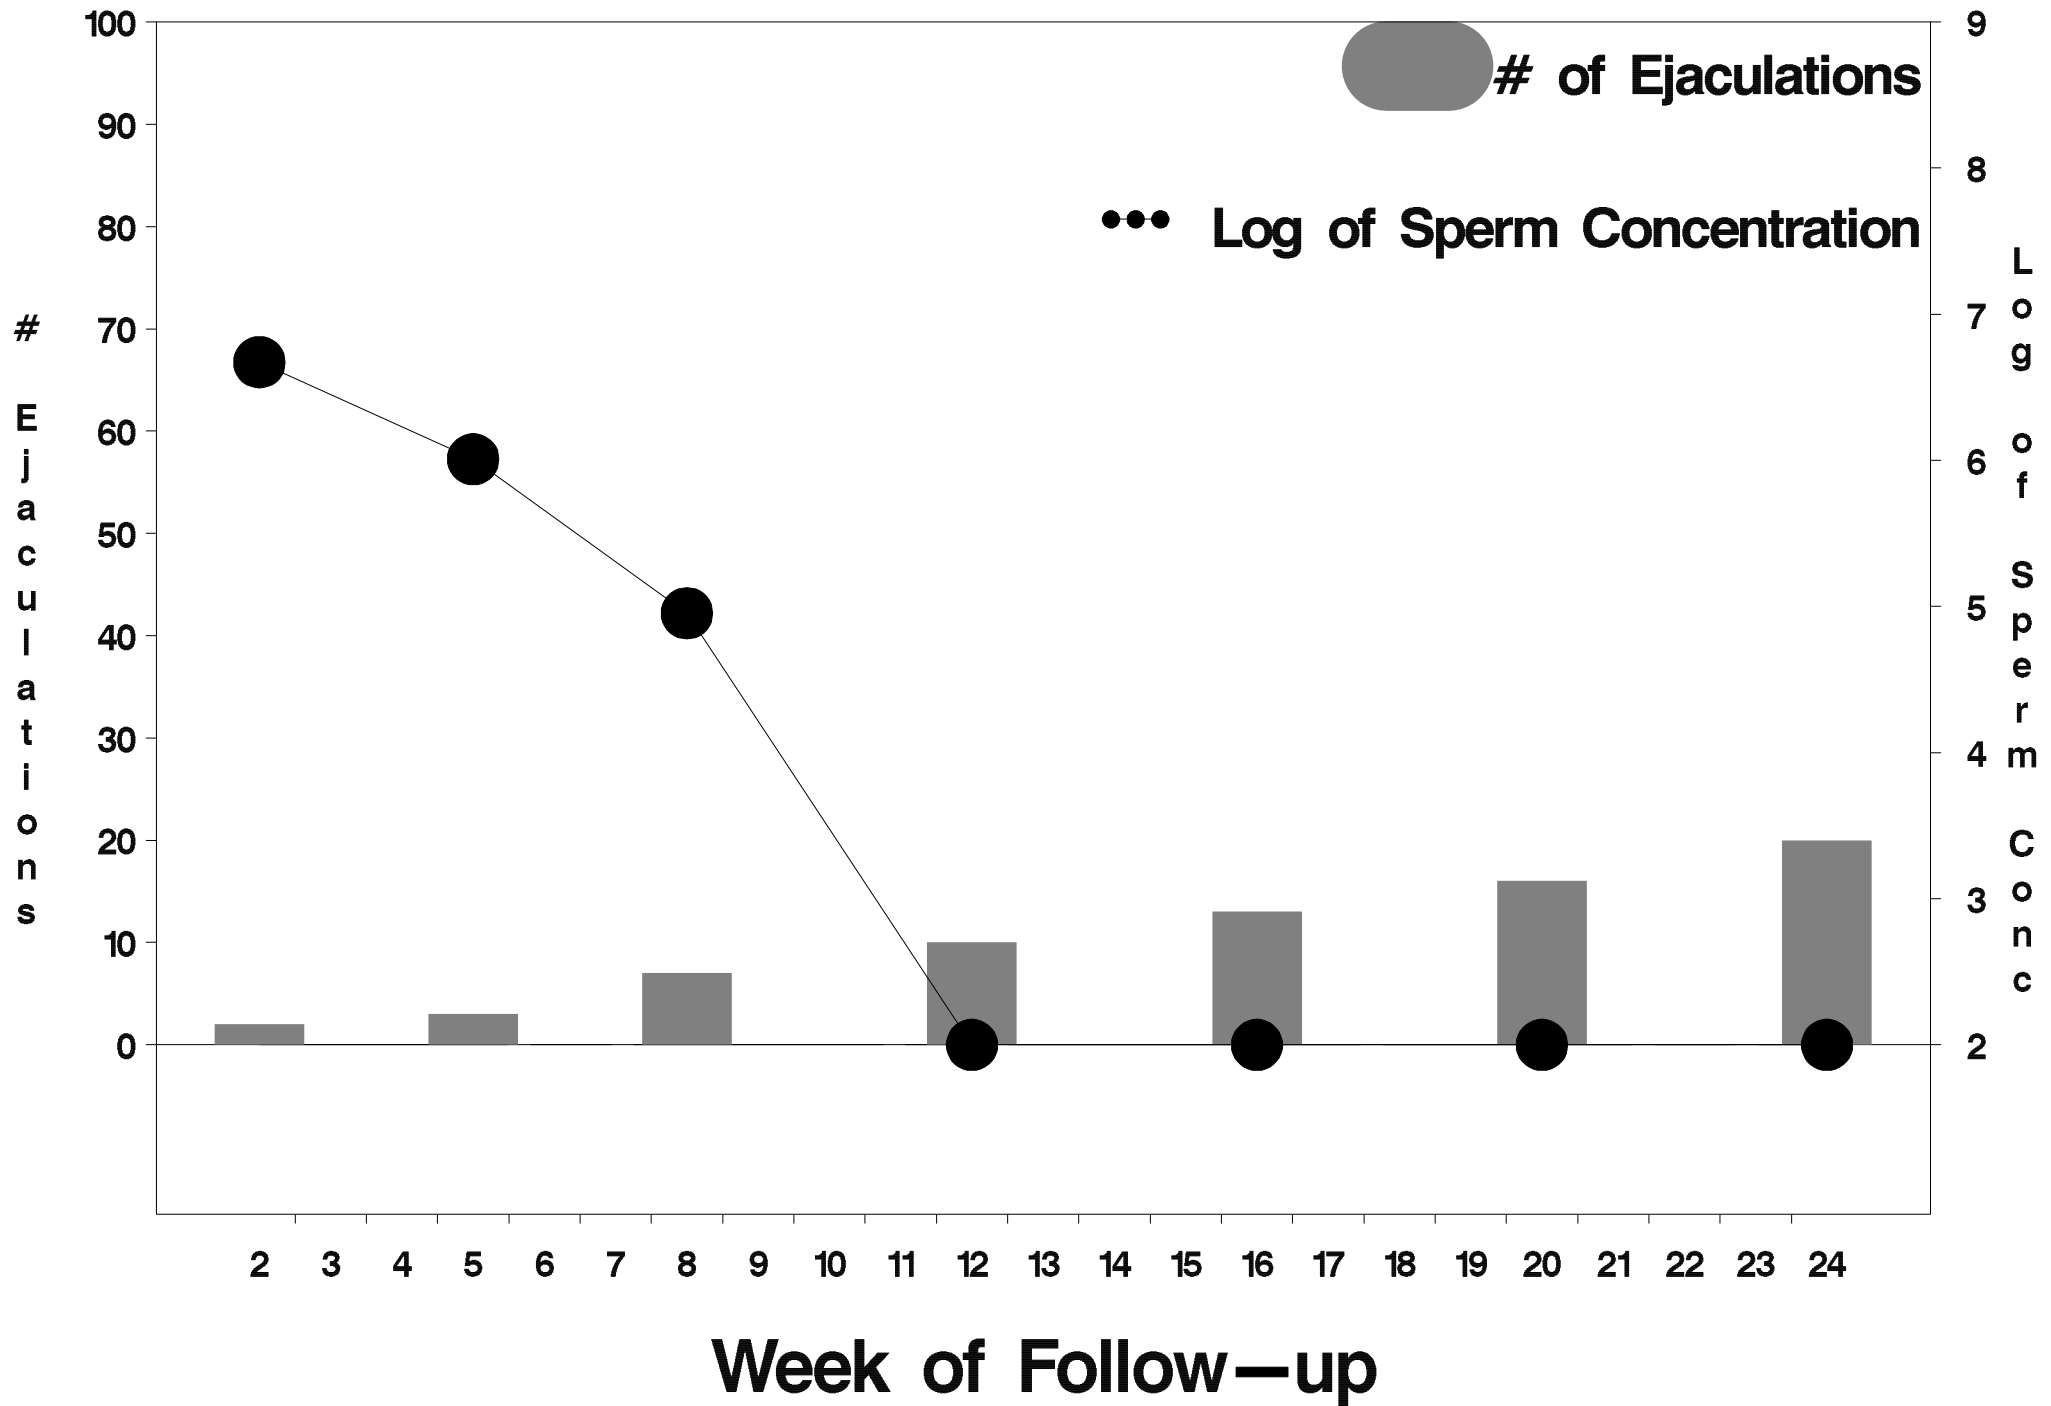

# Participant number= 366

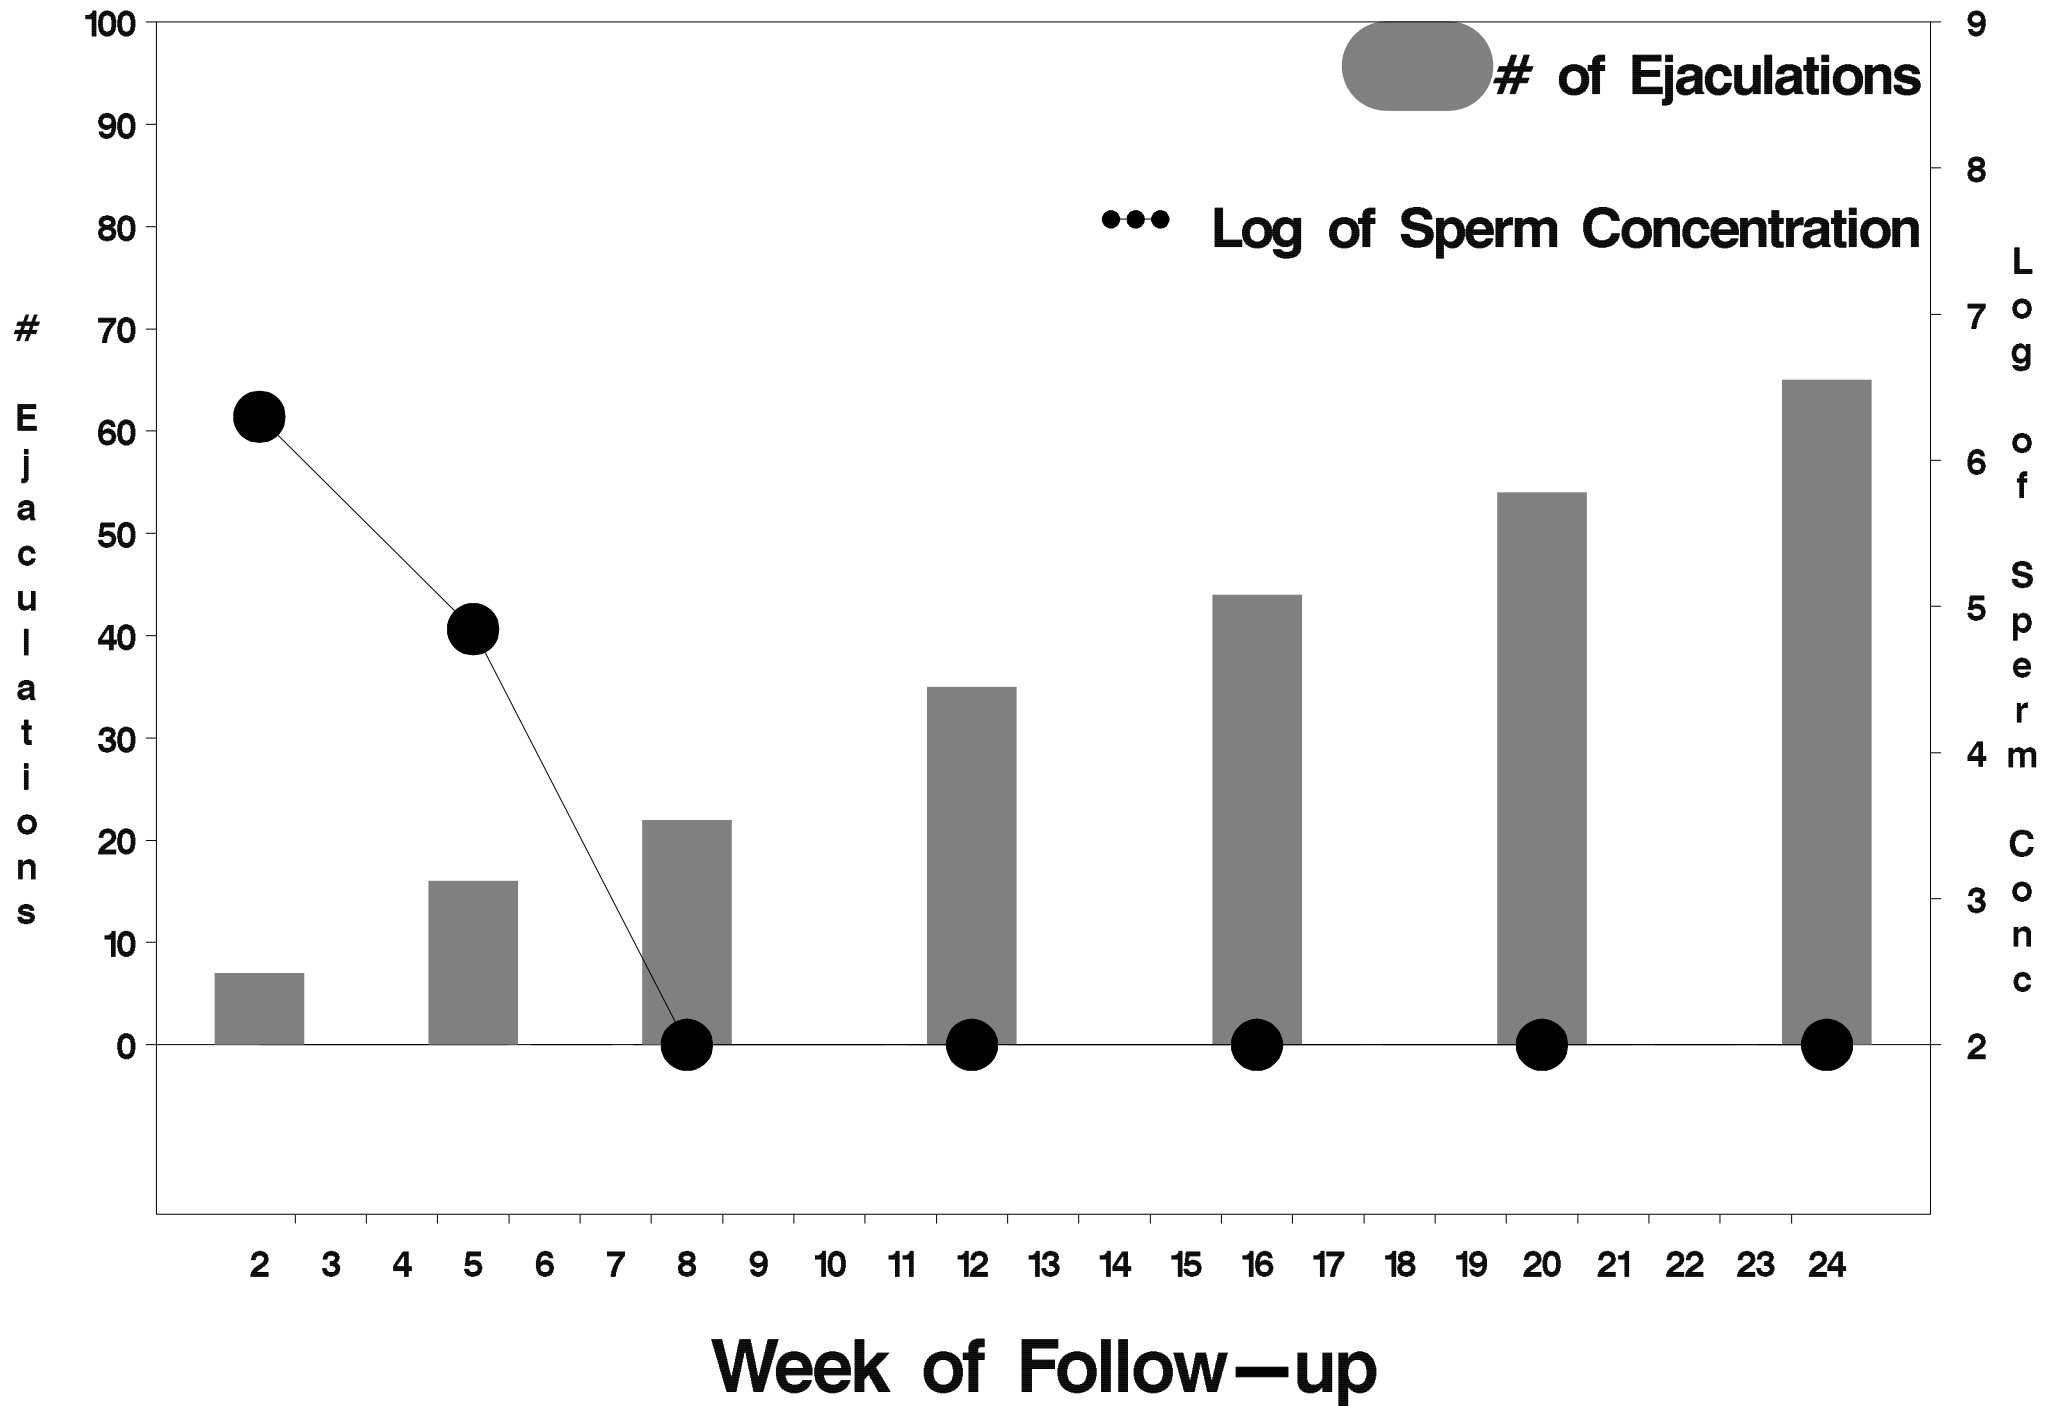

# Participant number= 367

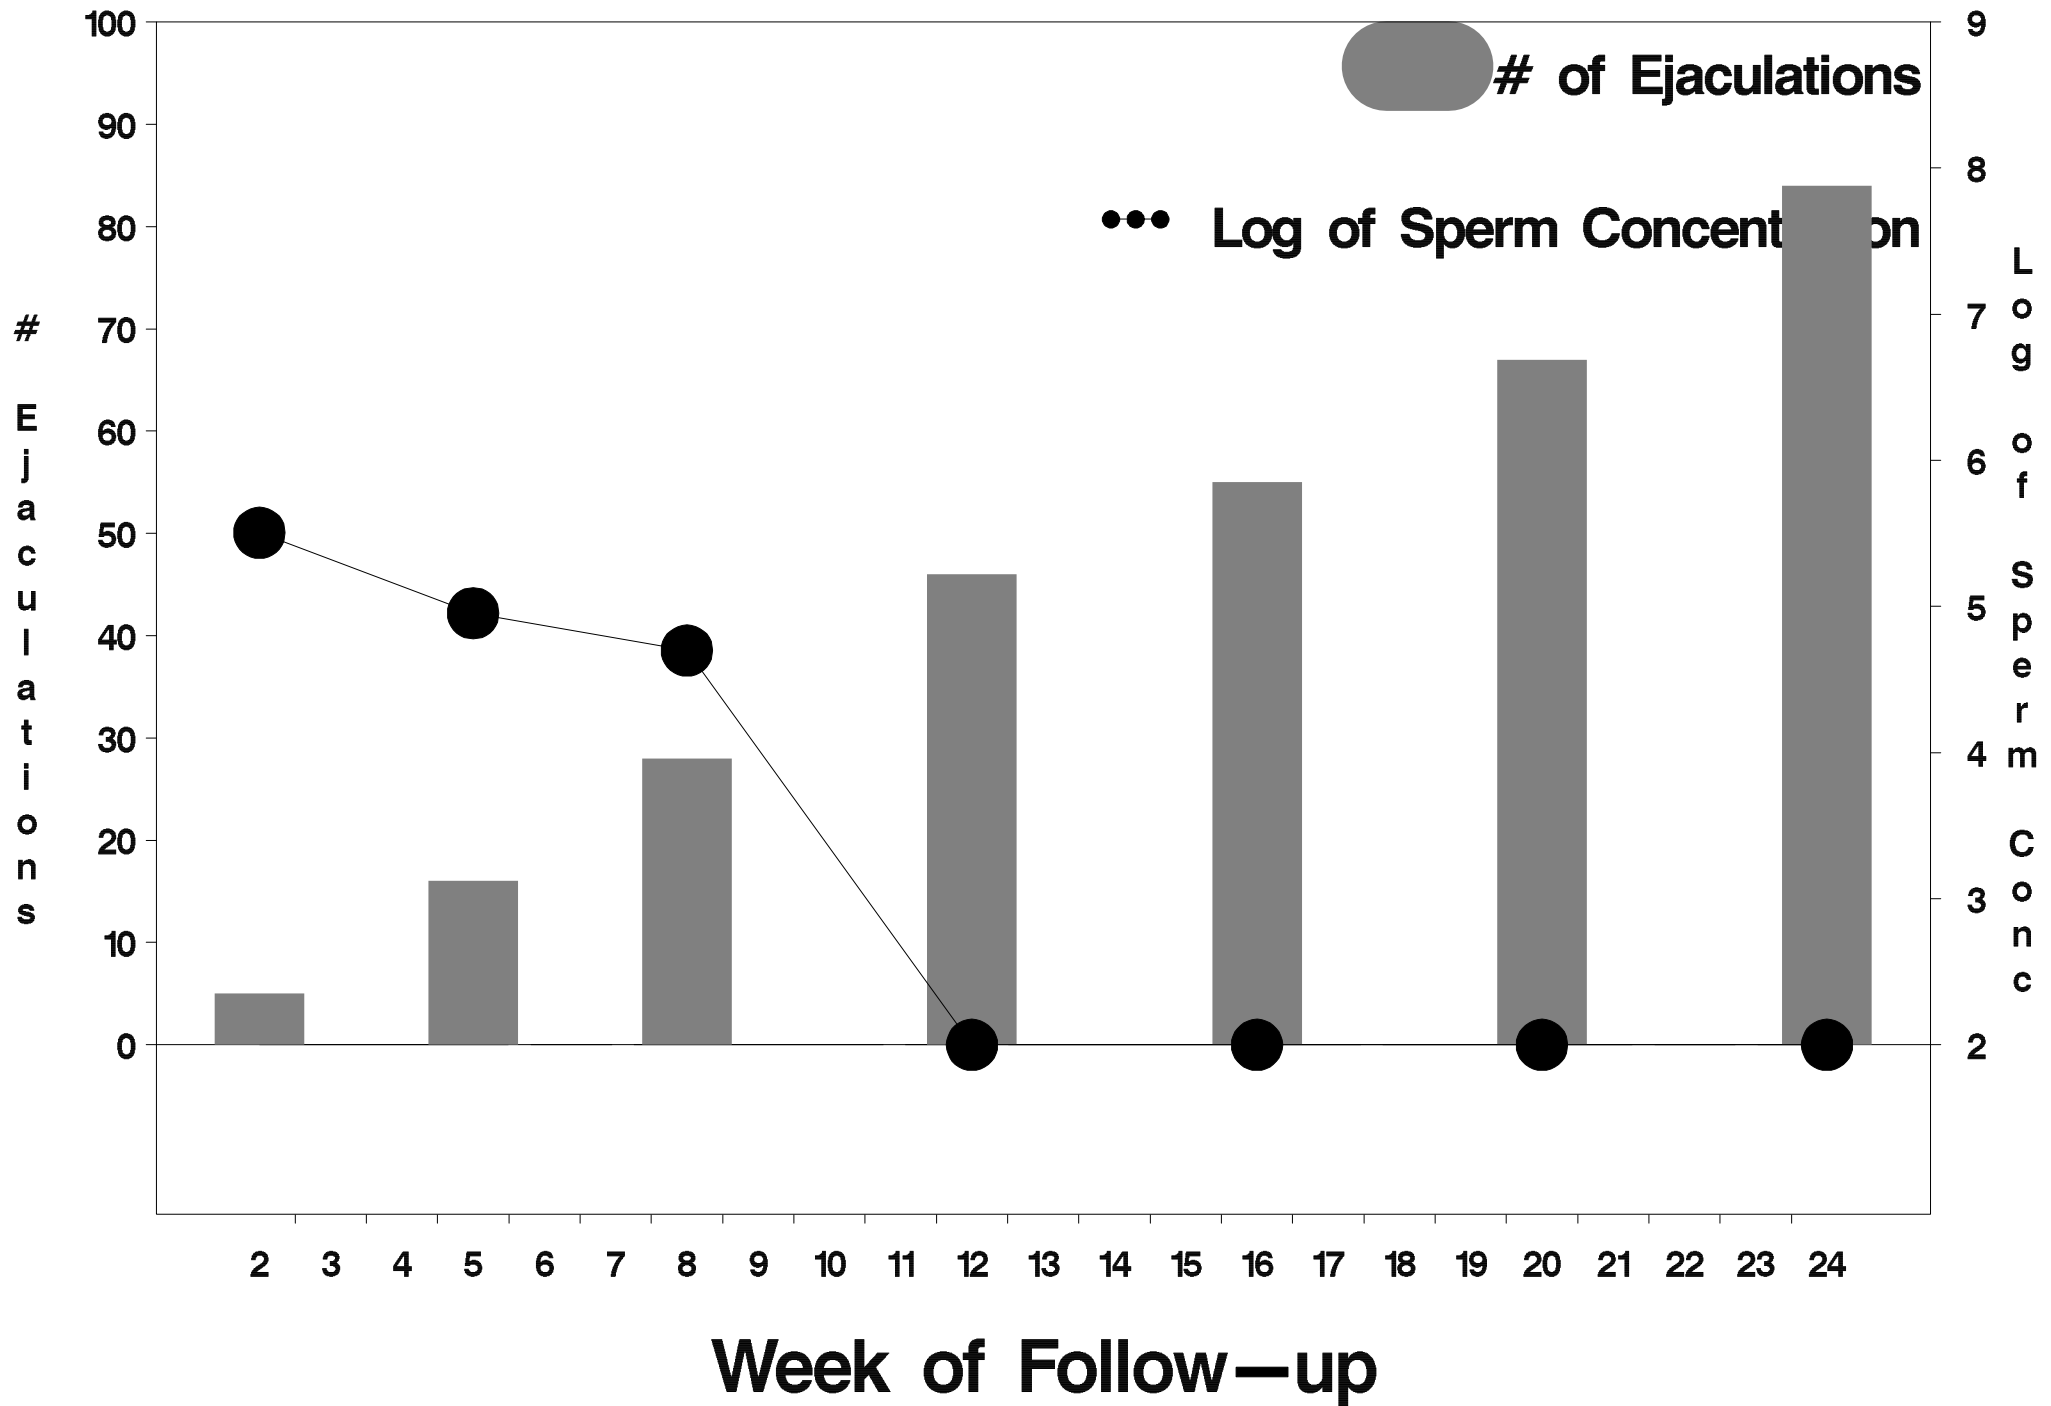

# Participant number= 368

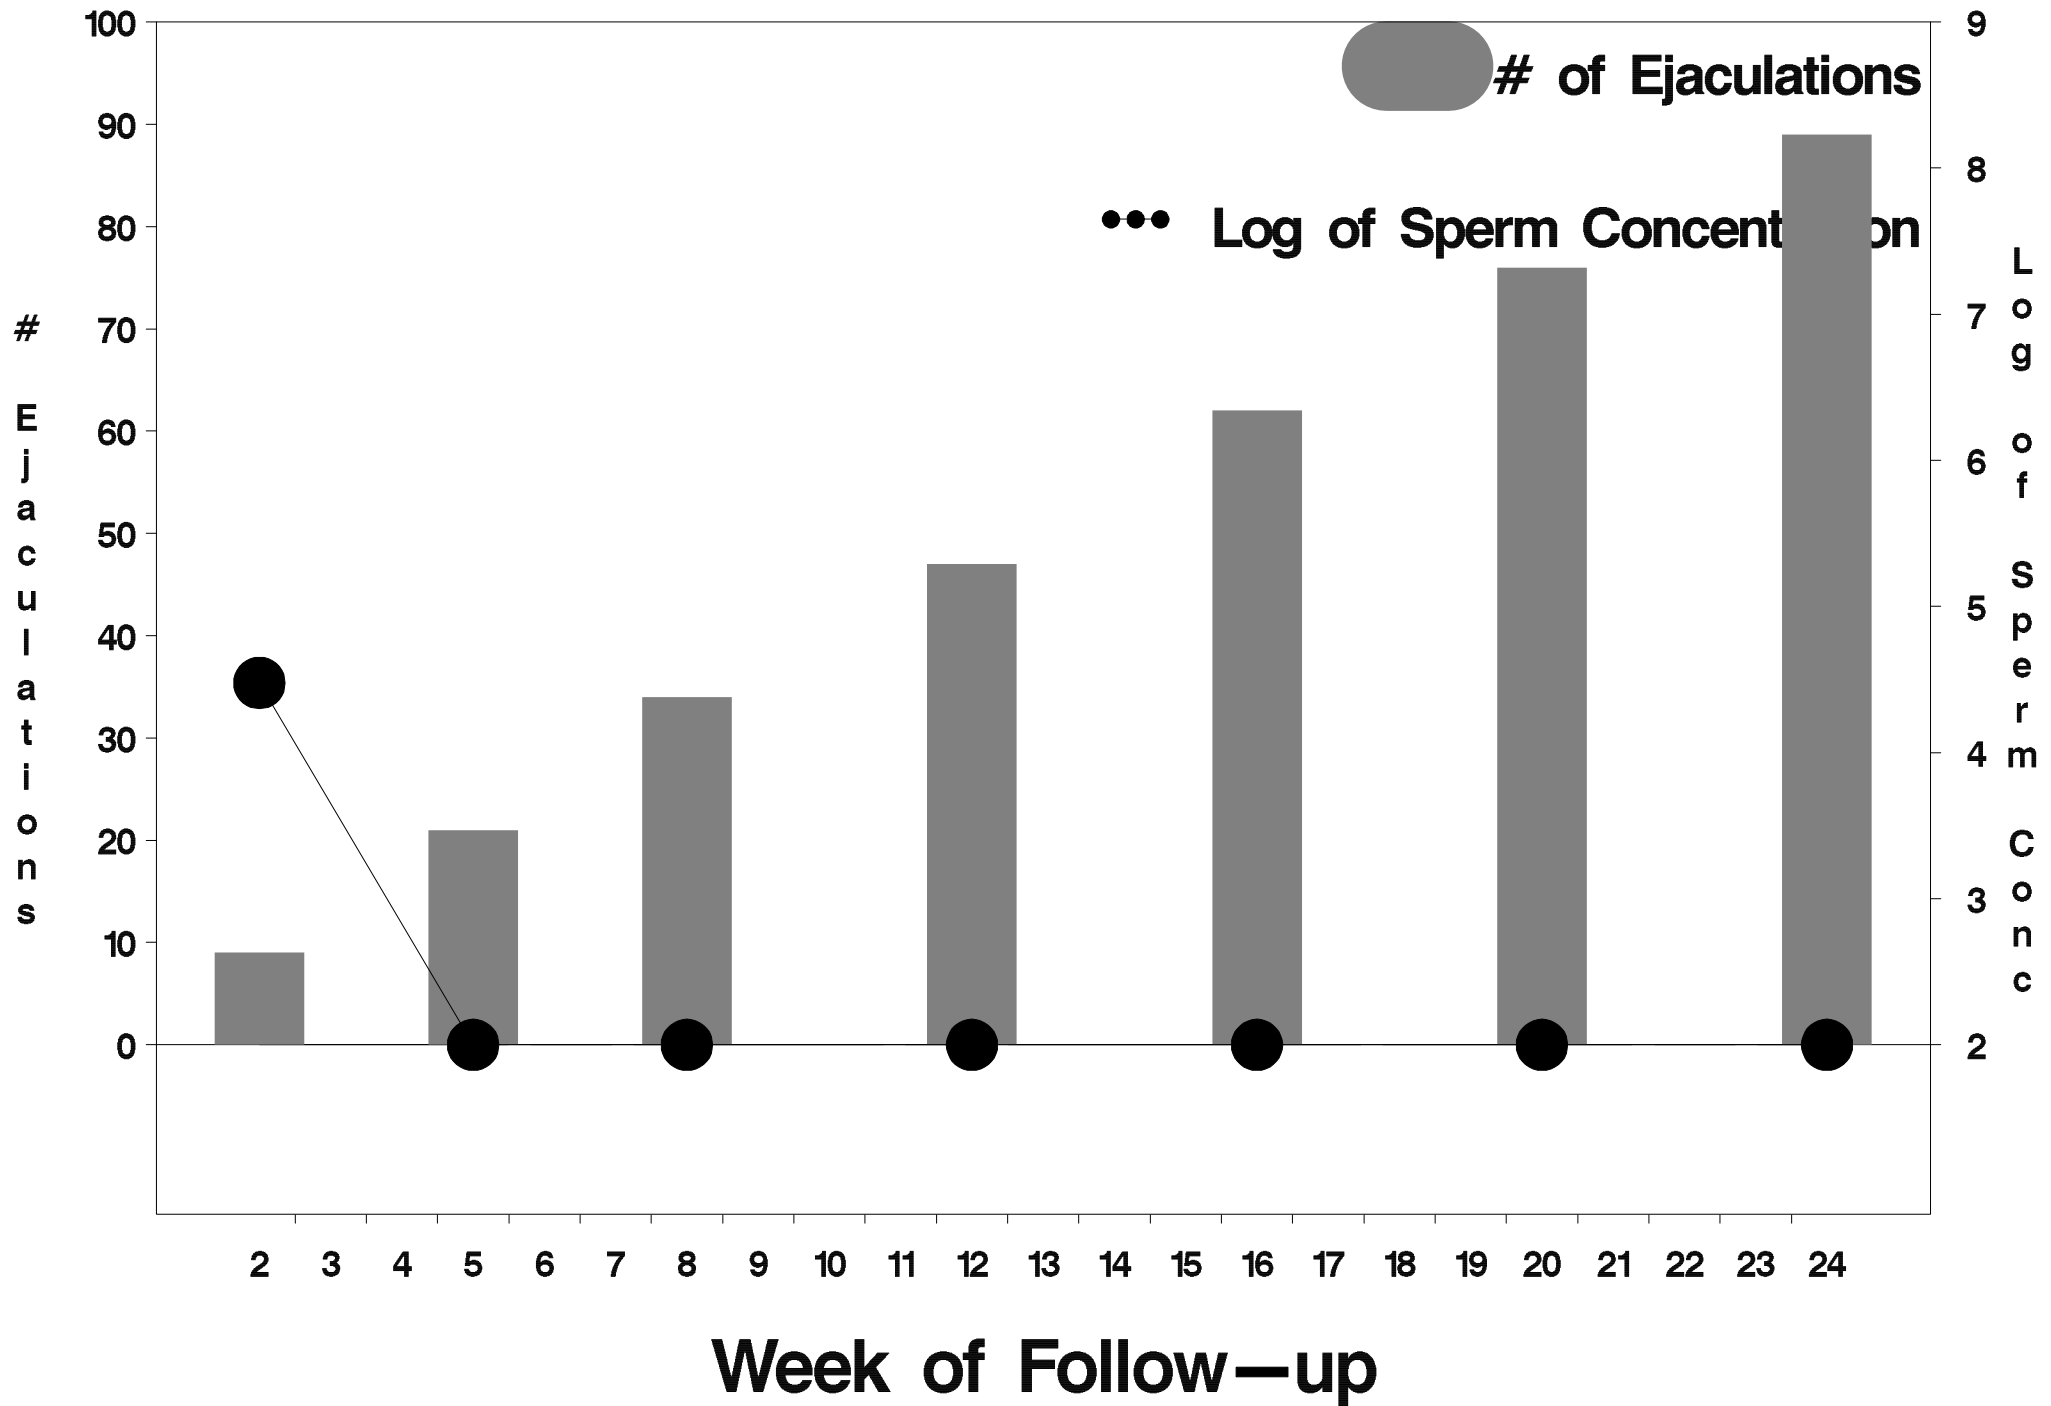

# Participant number= 369

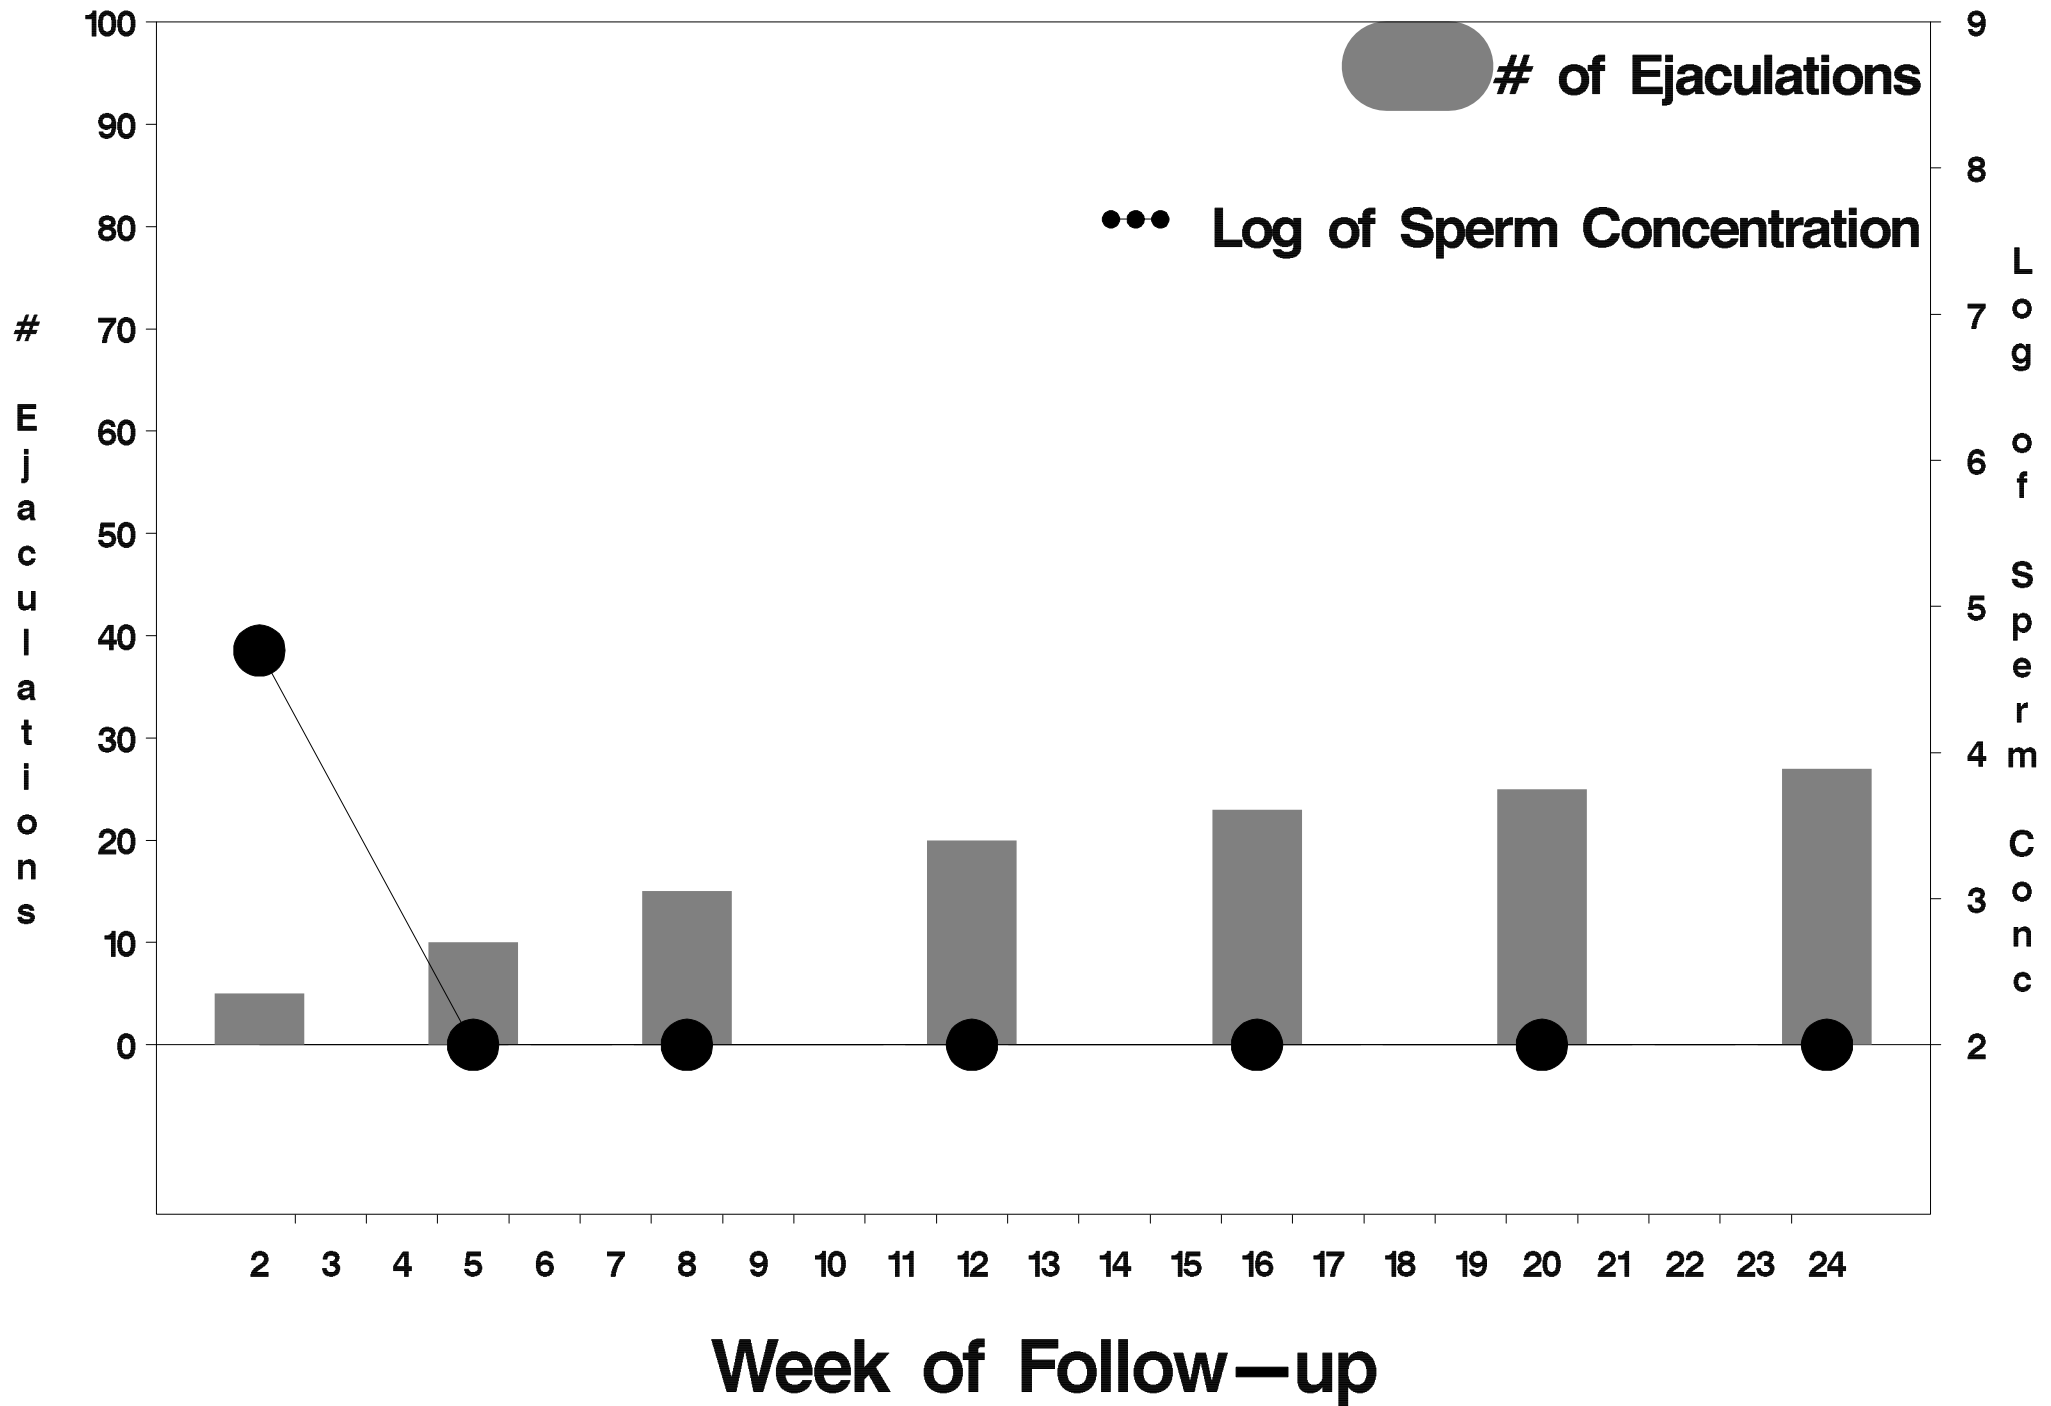



# Participant number= 370

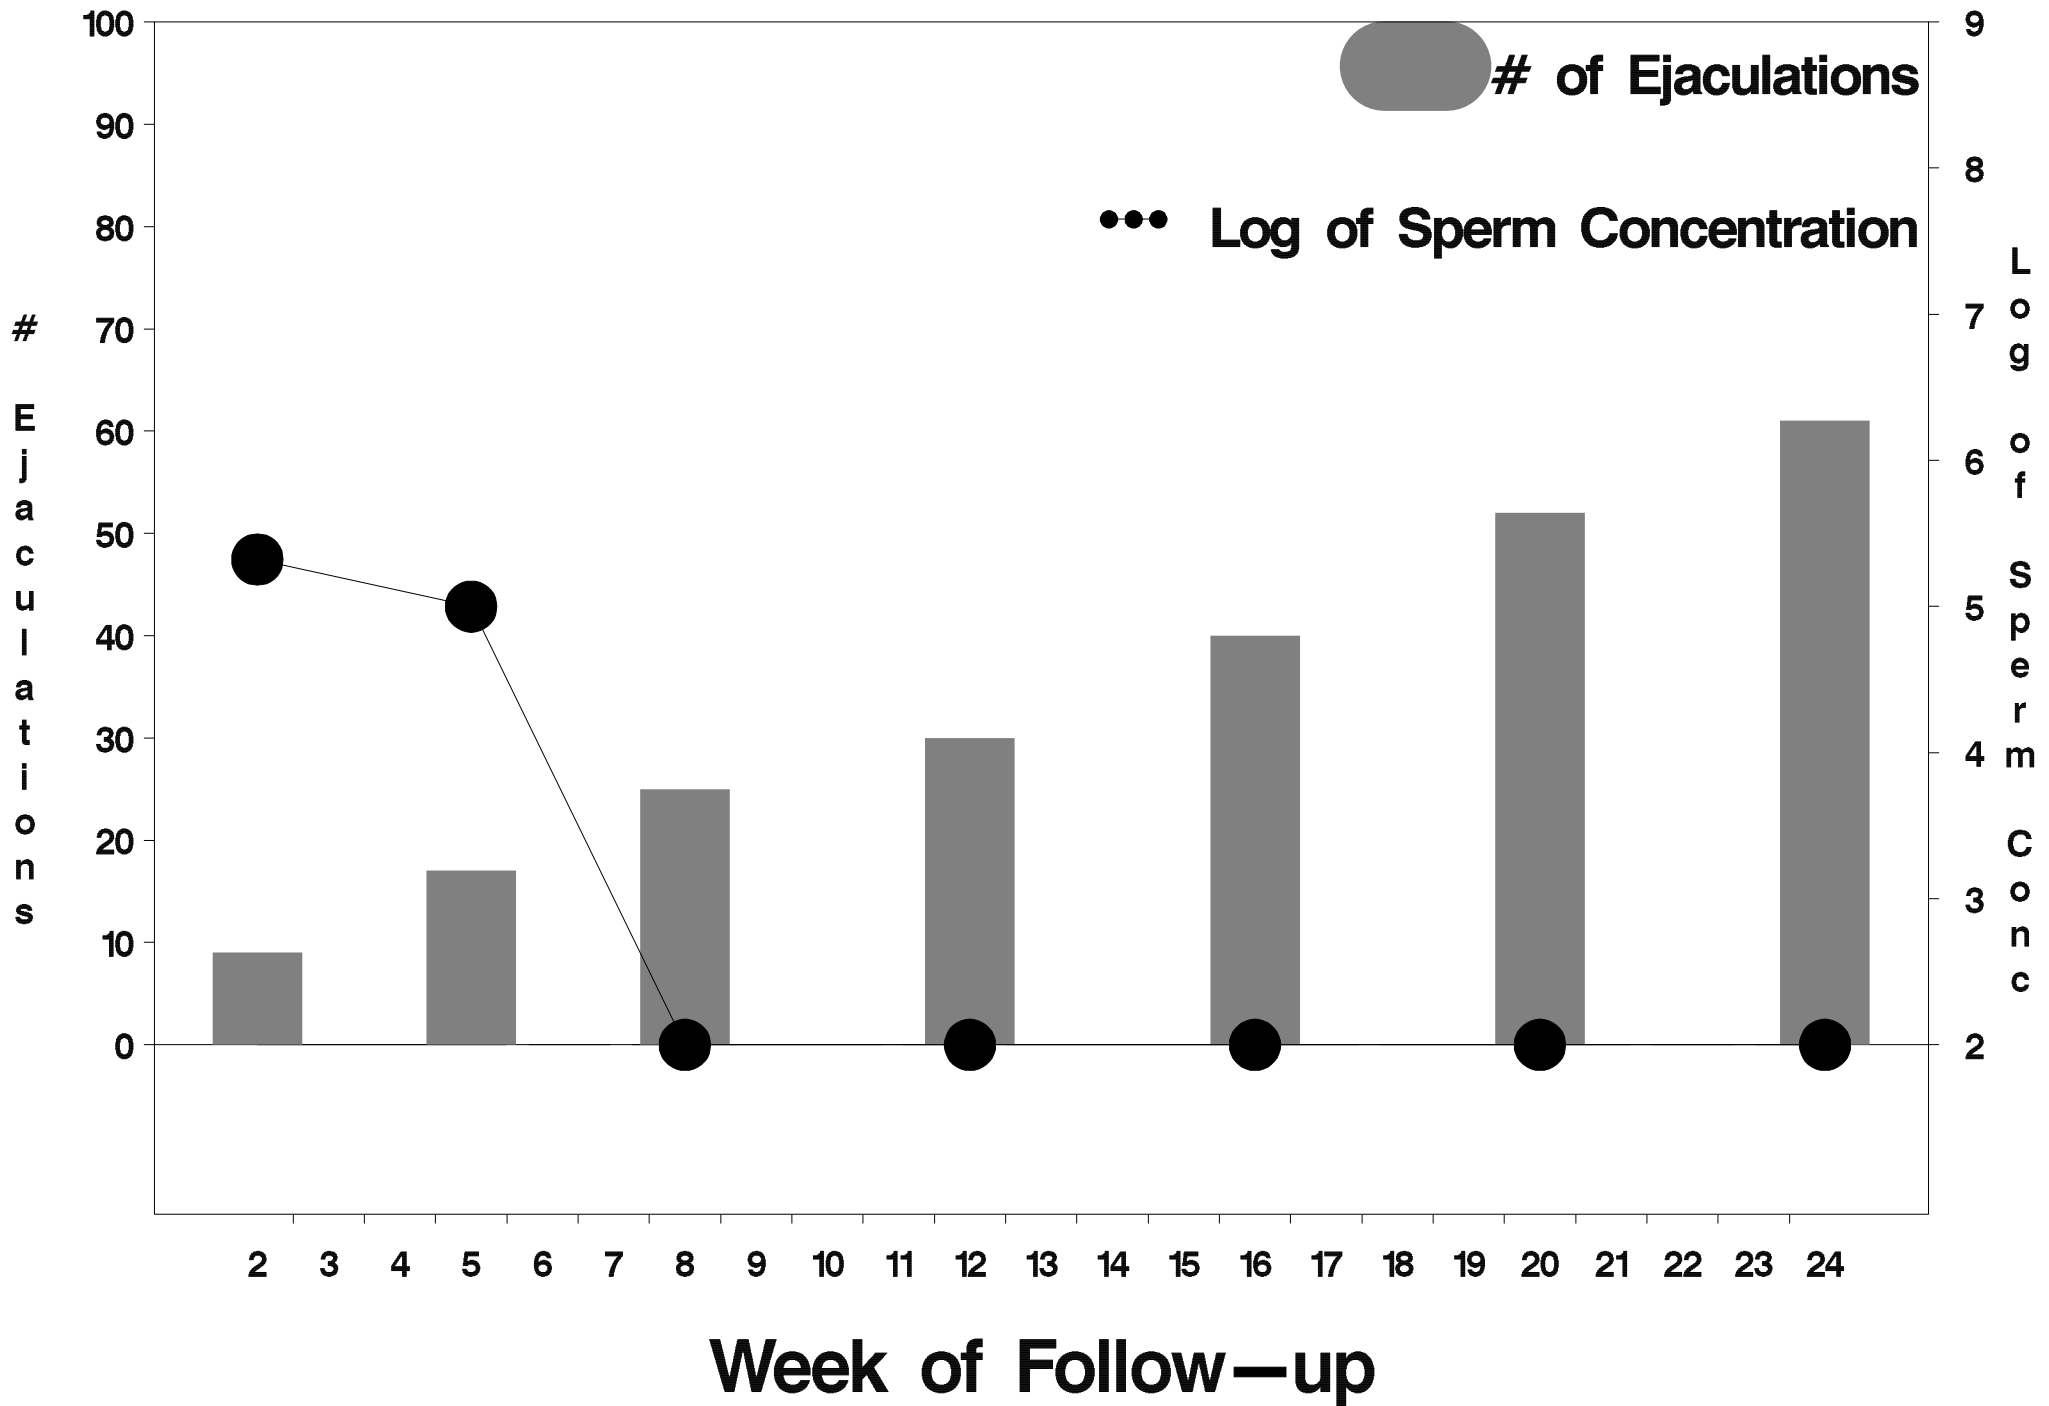

# Participant number= 371

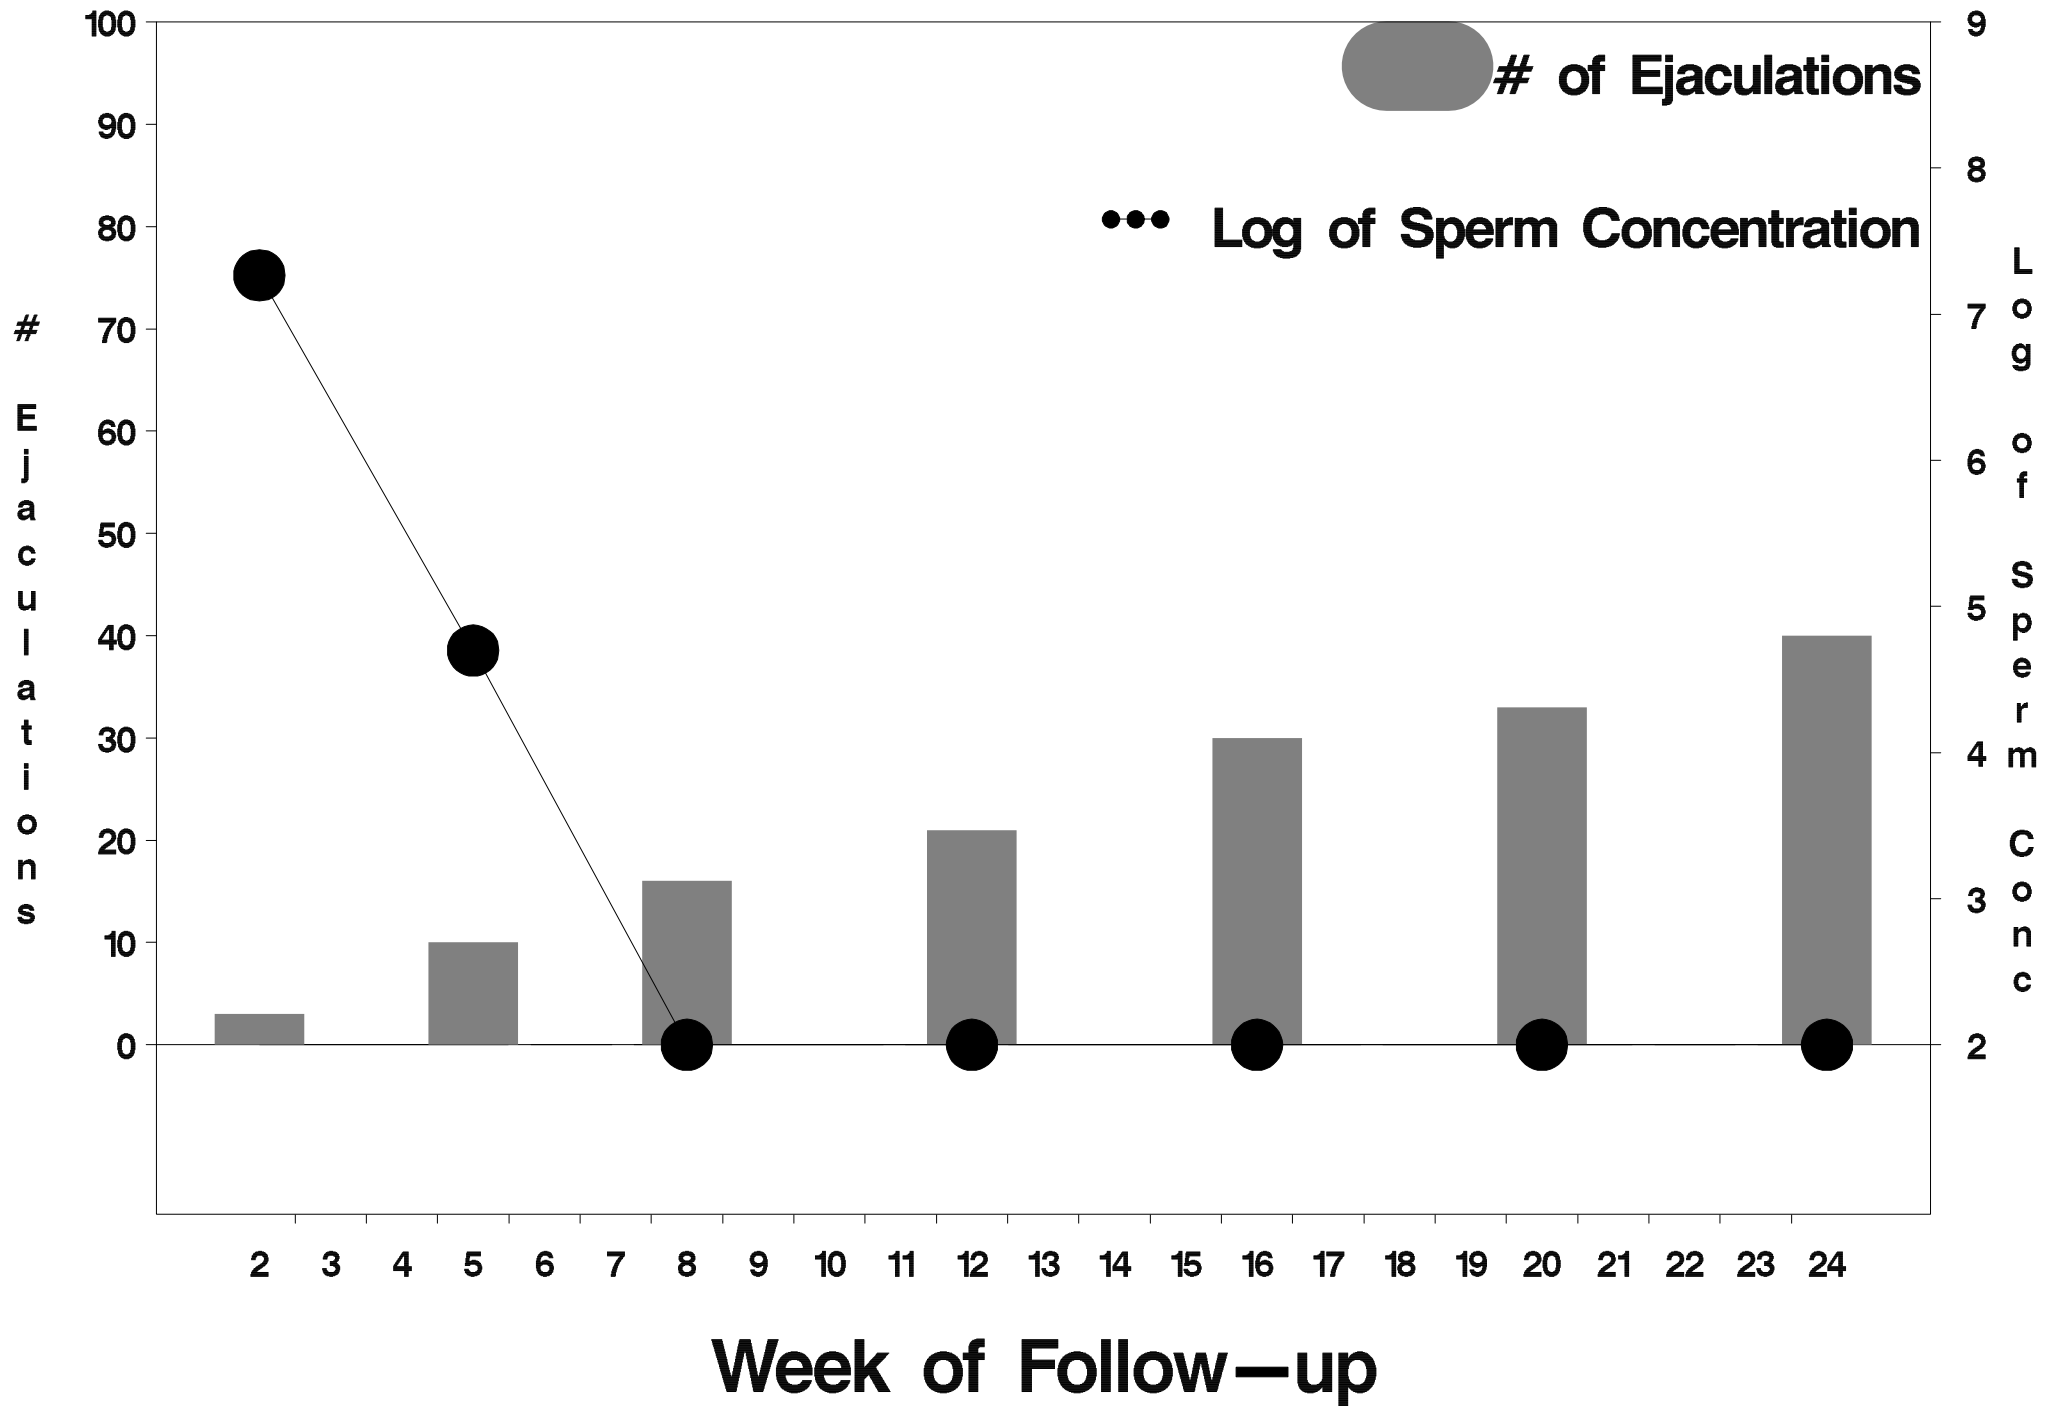

# Participant number= 372

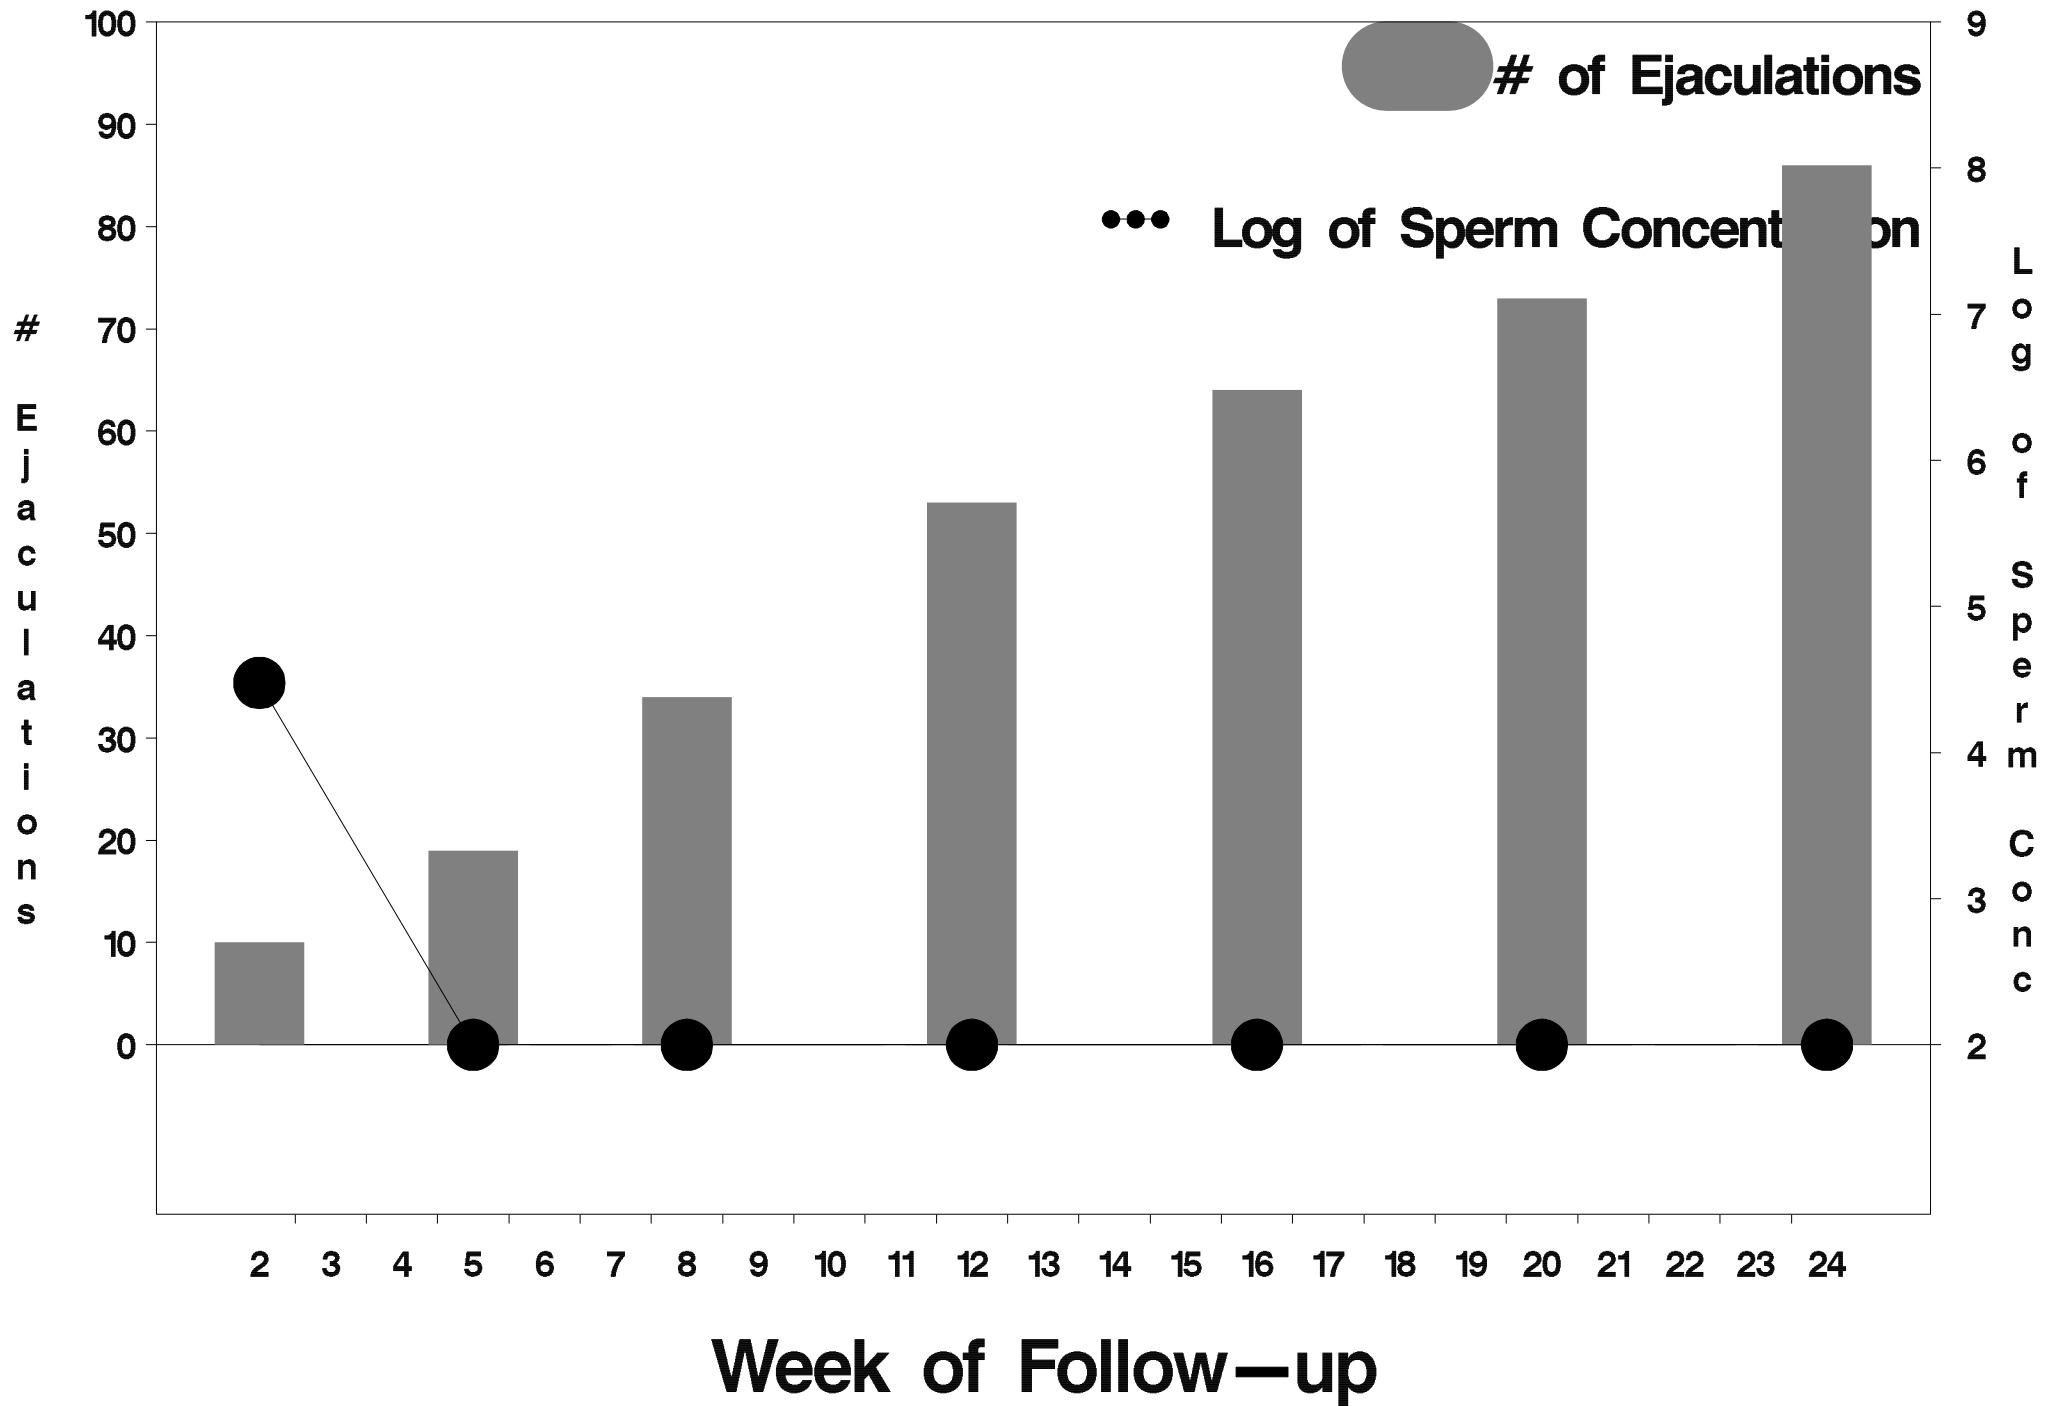

# Participant number= 373

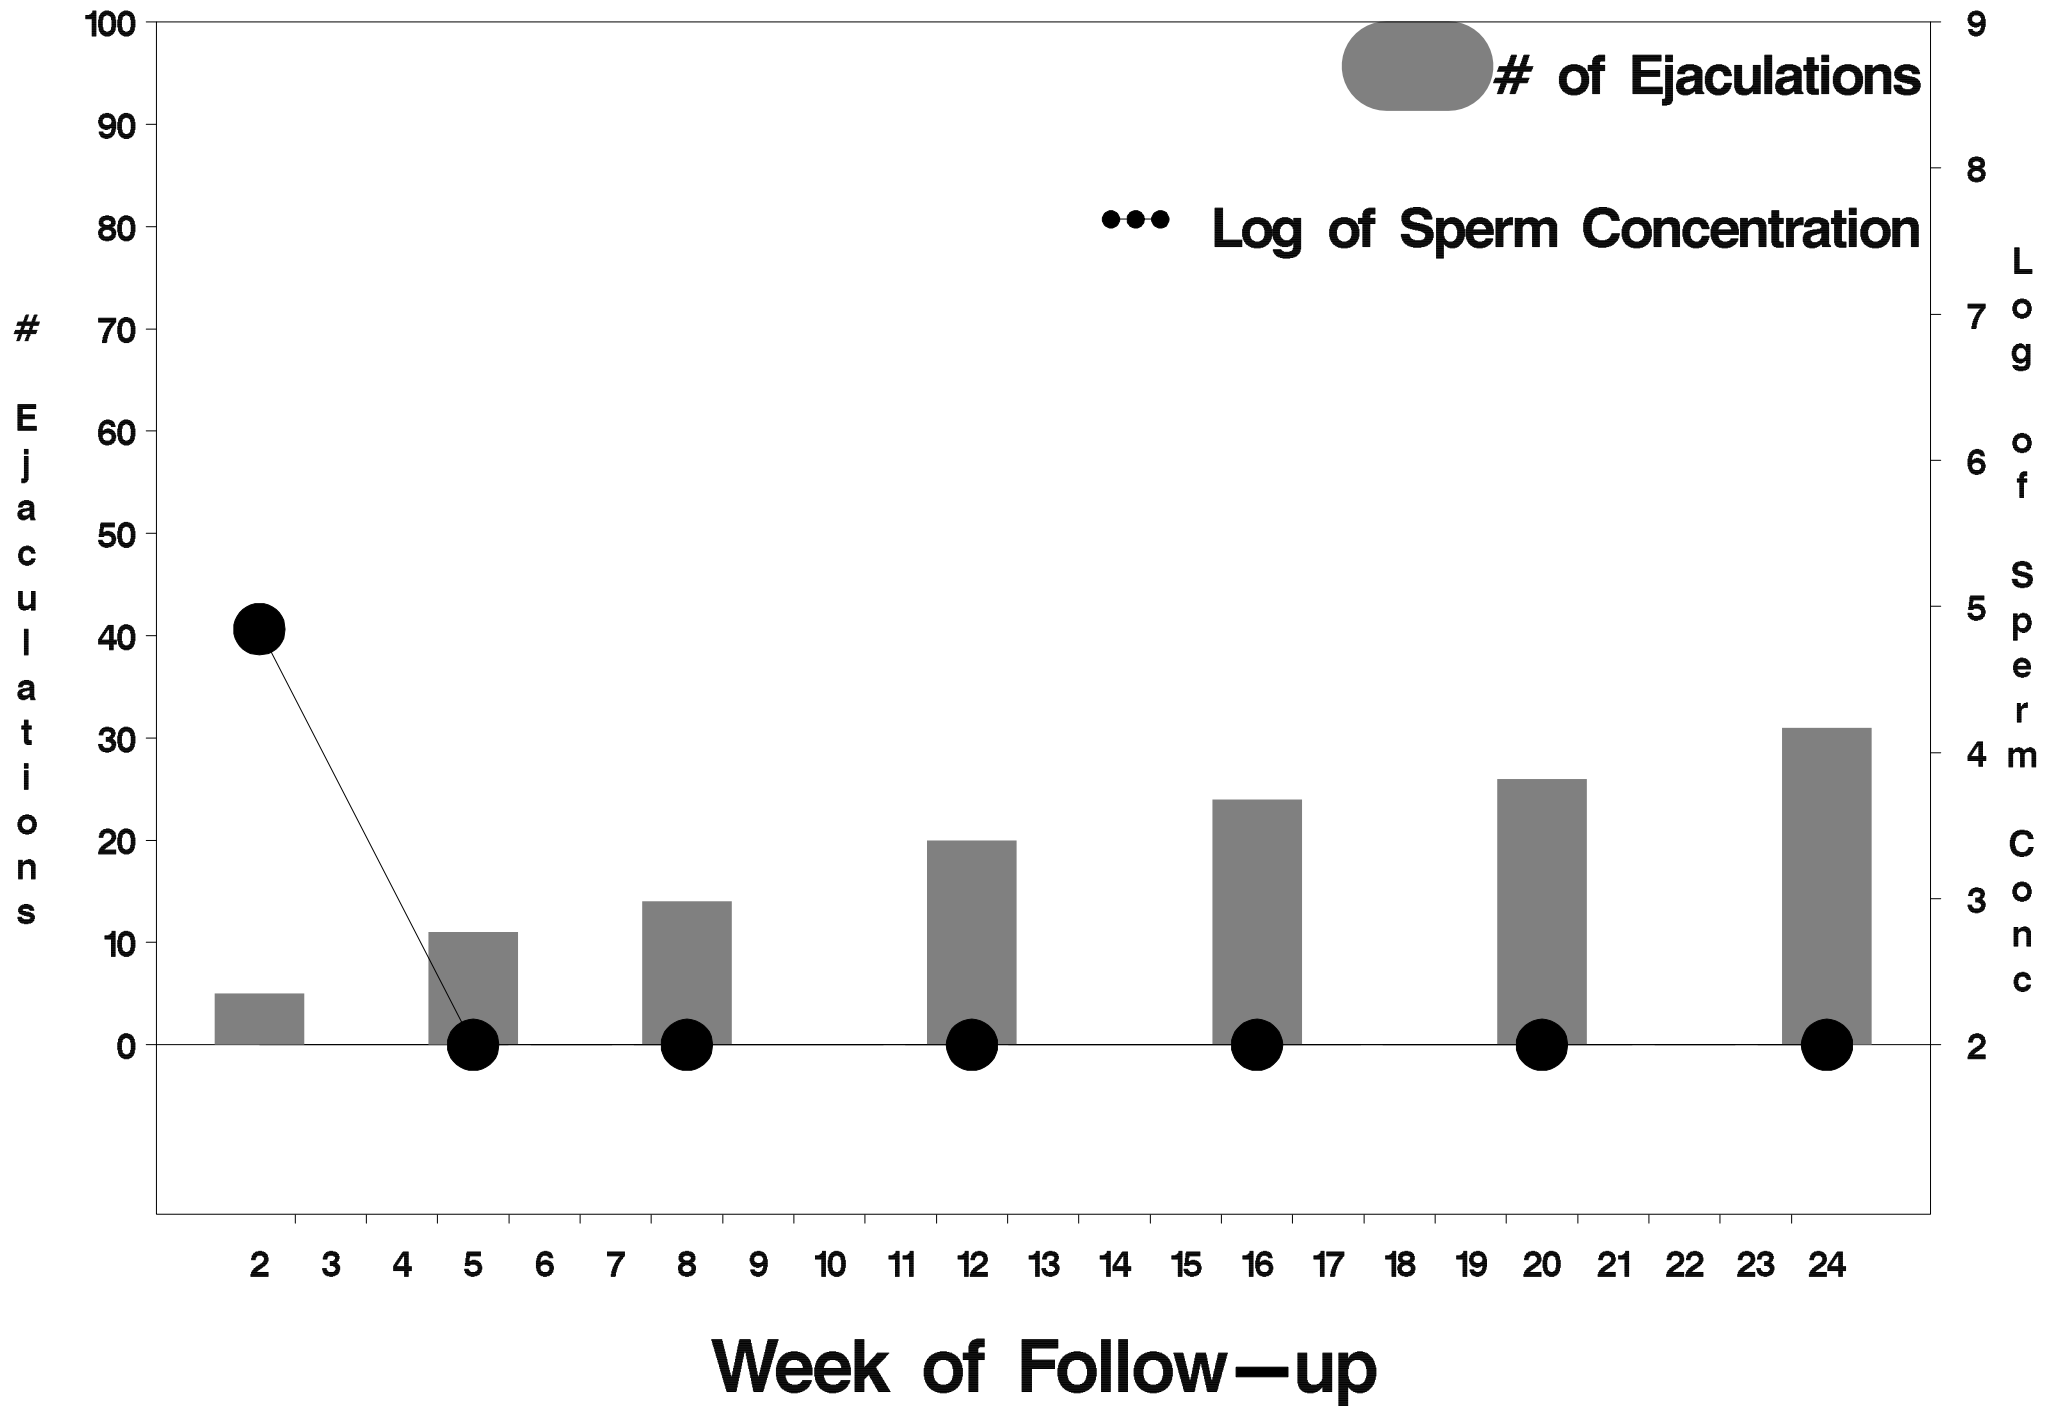

# Participant number= 374

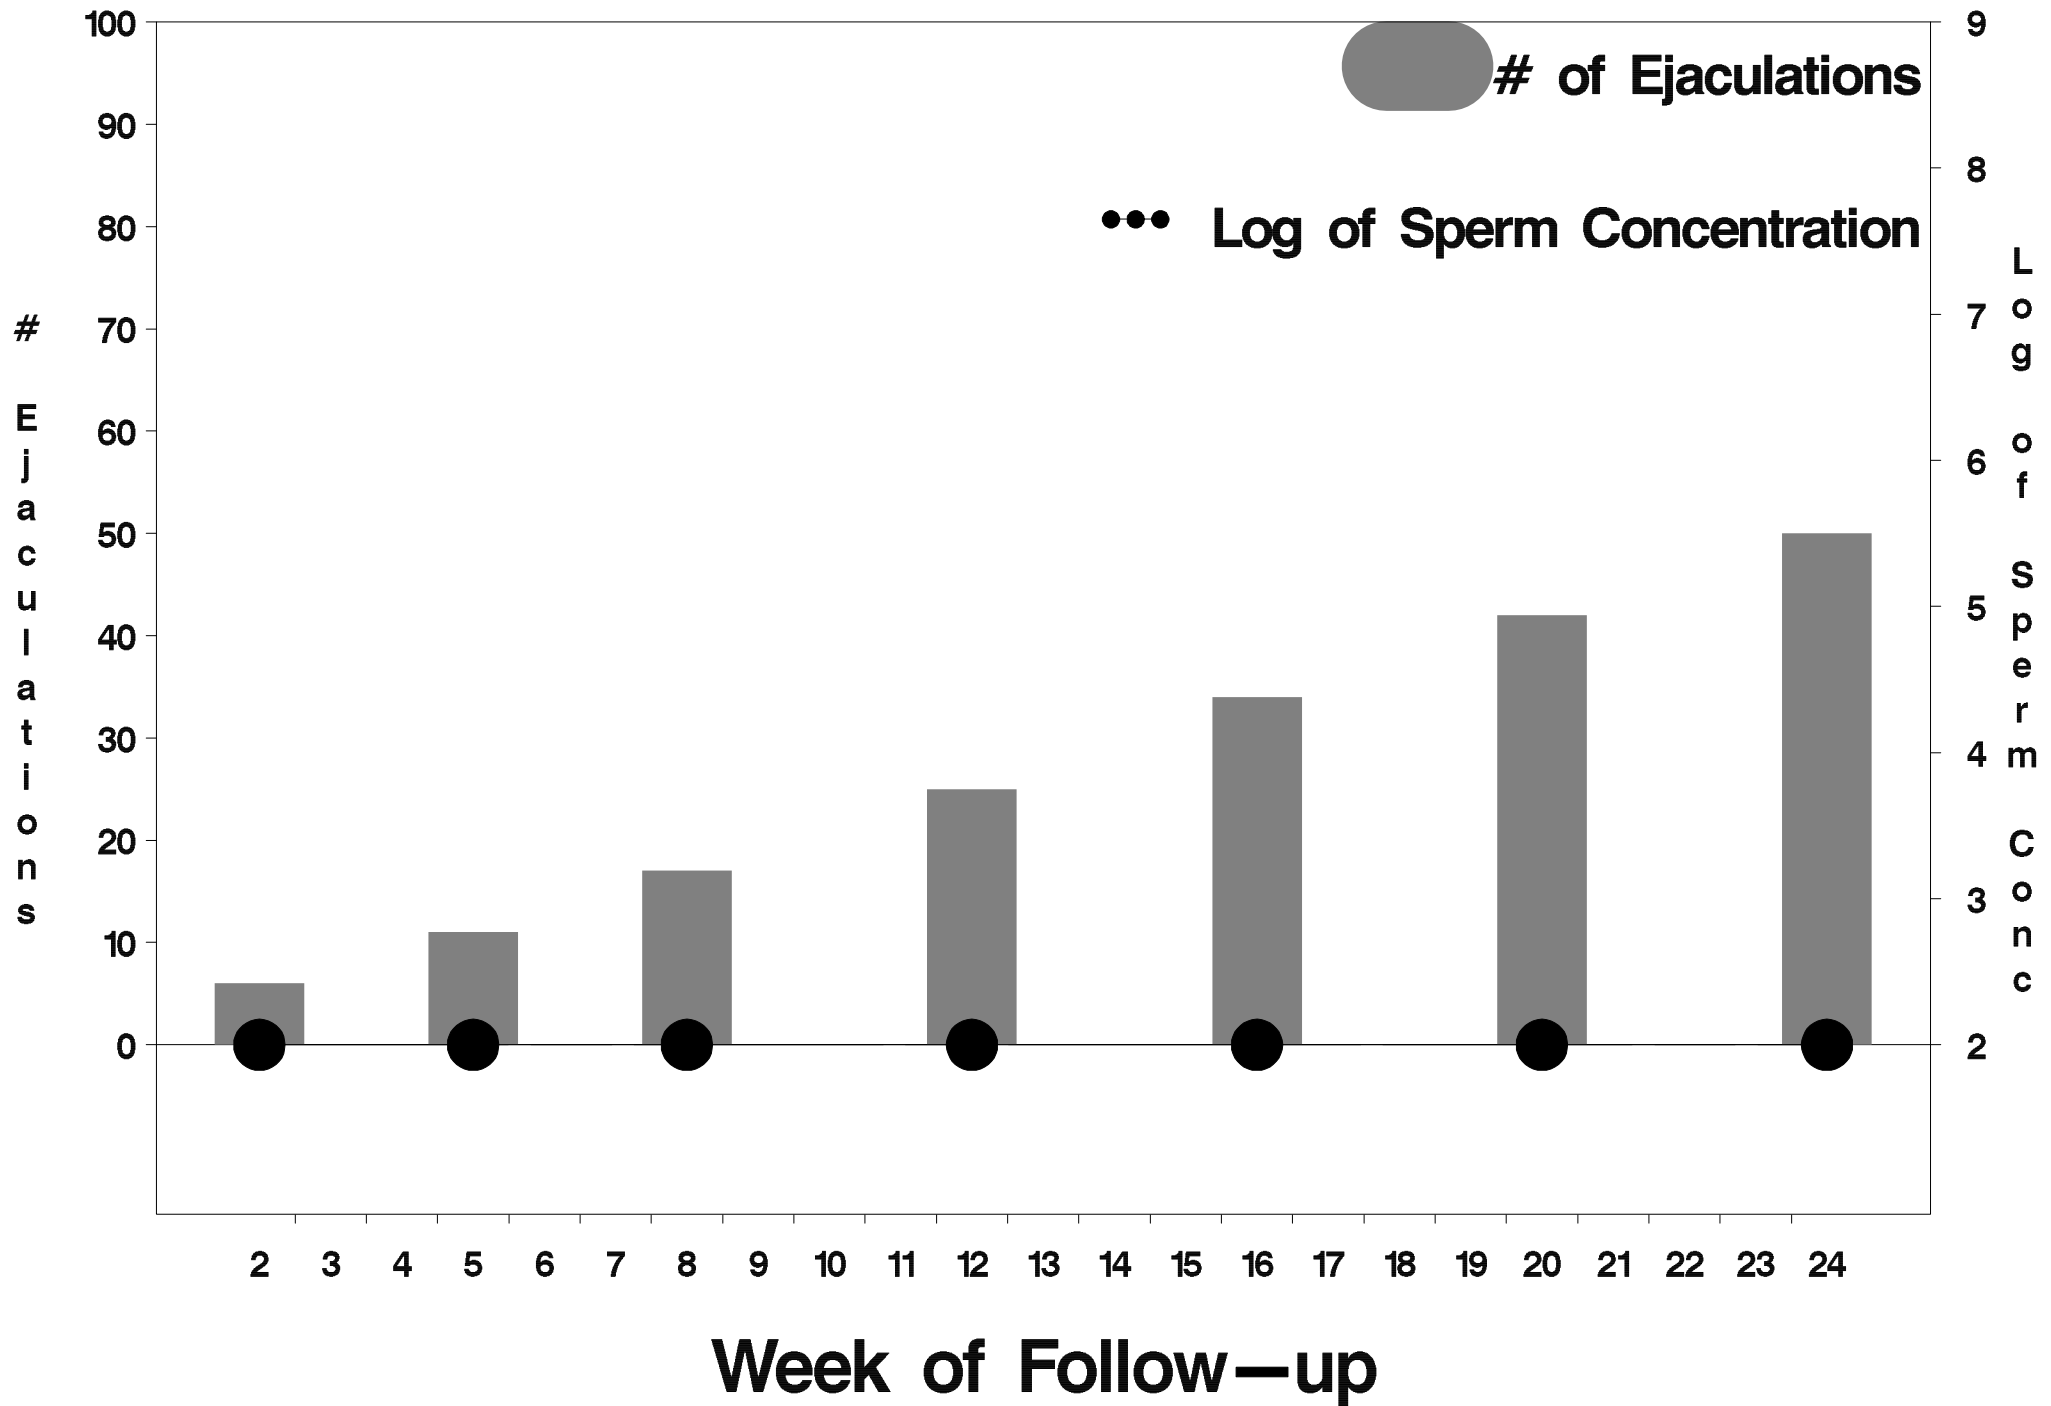

# Participant number= 375

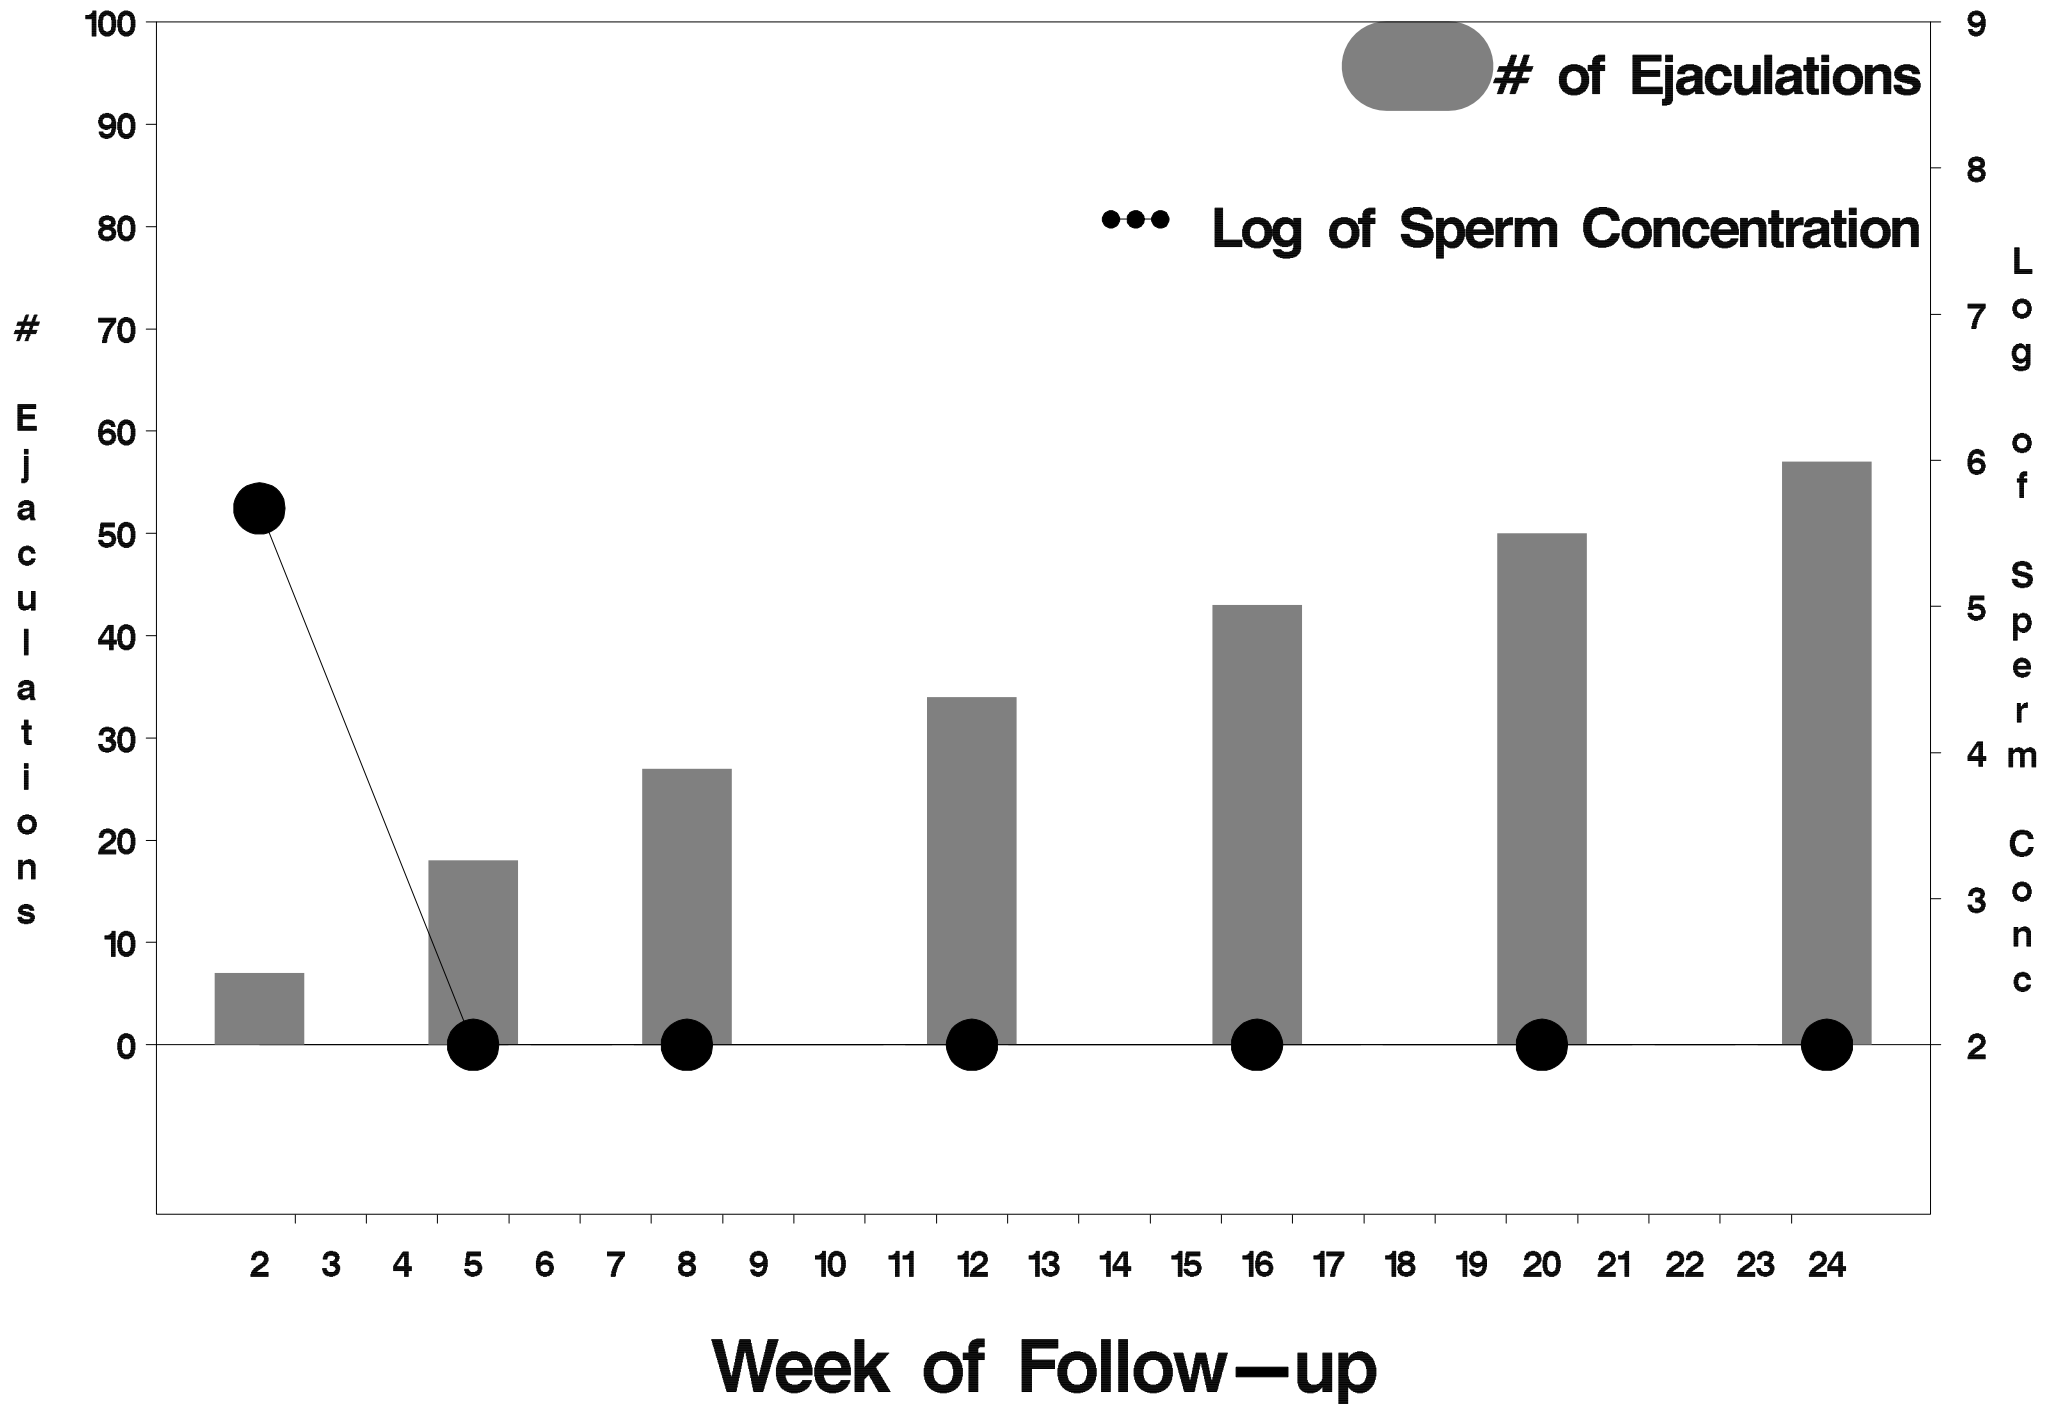

# Participant number= 376

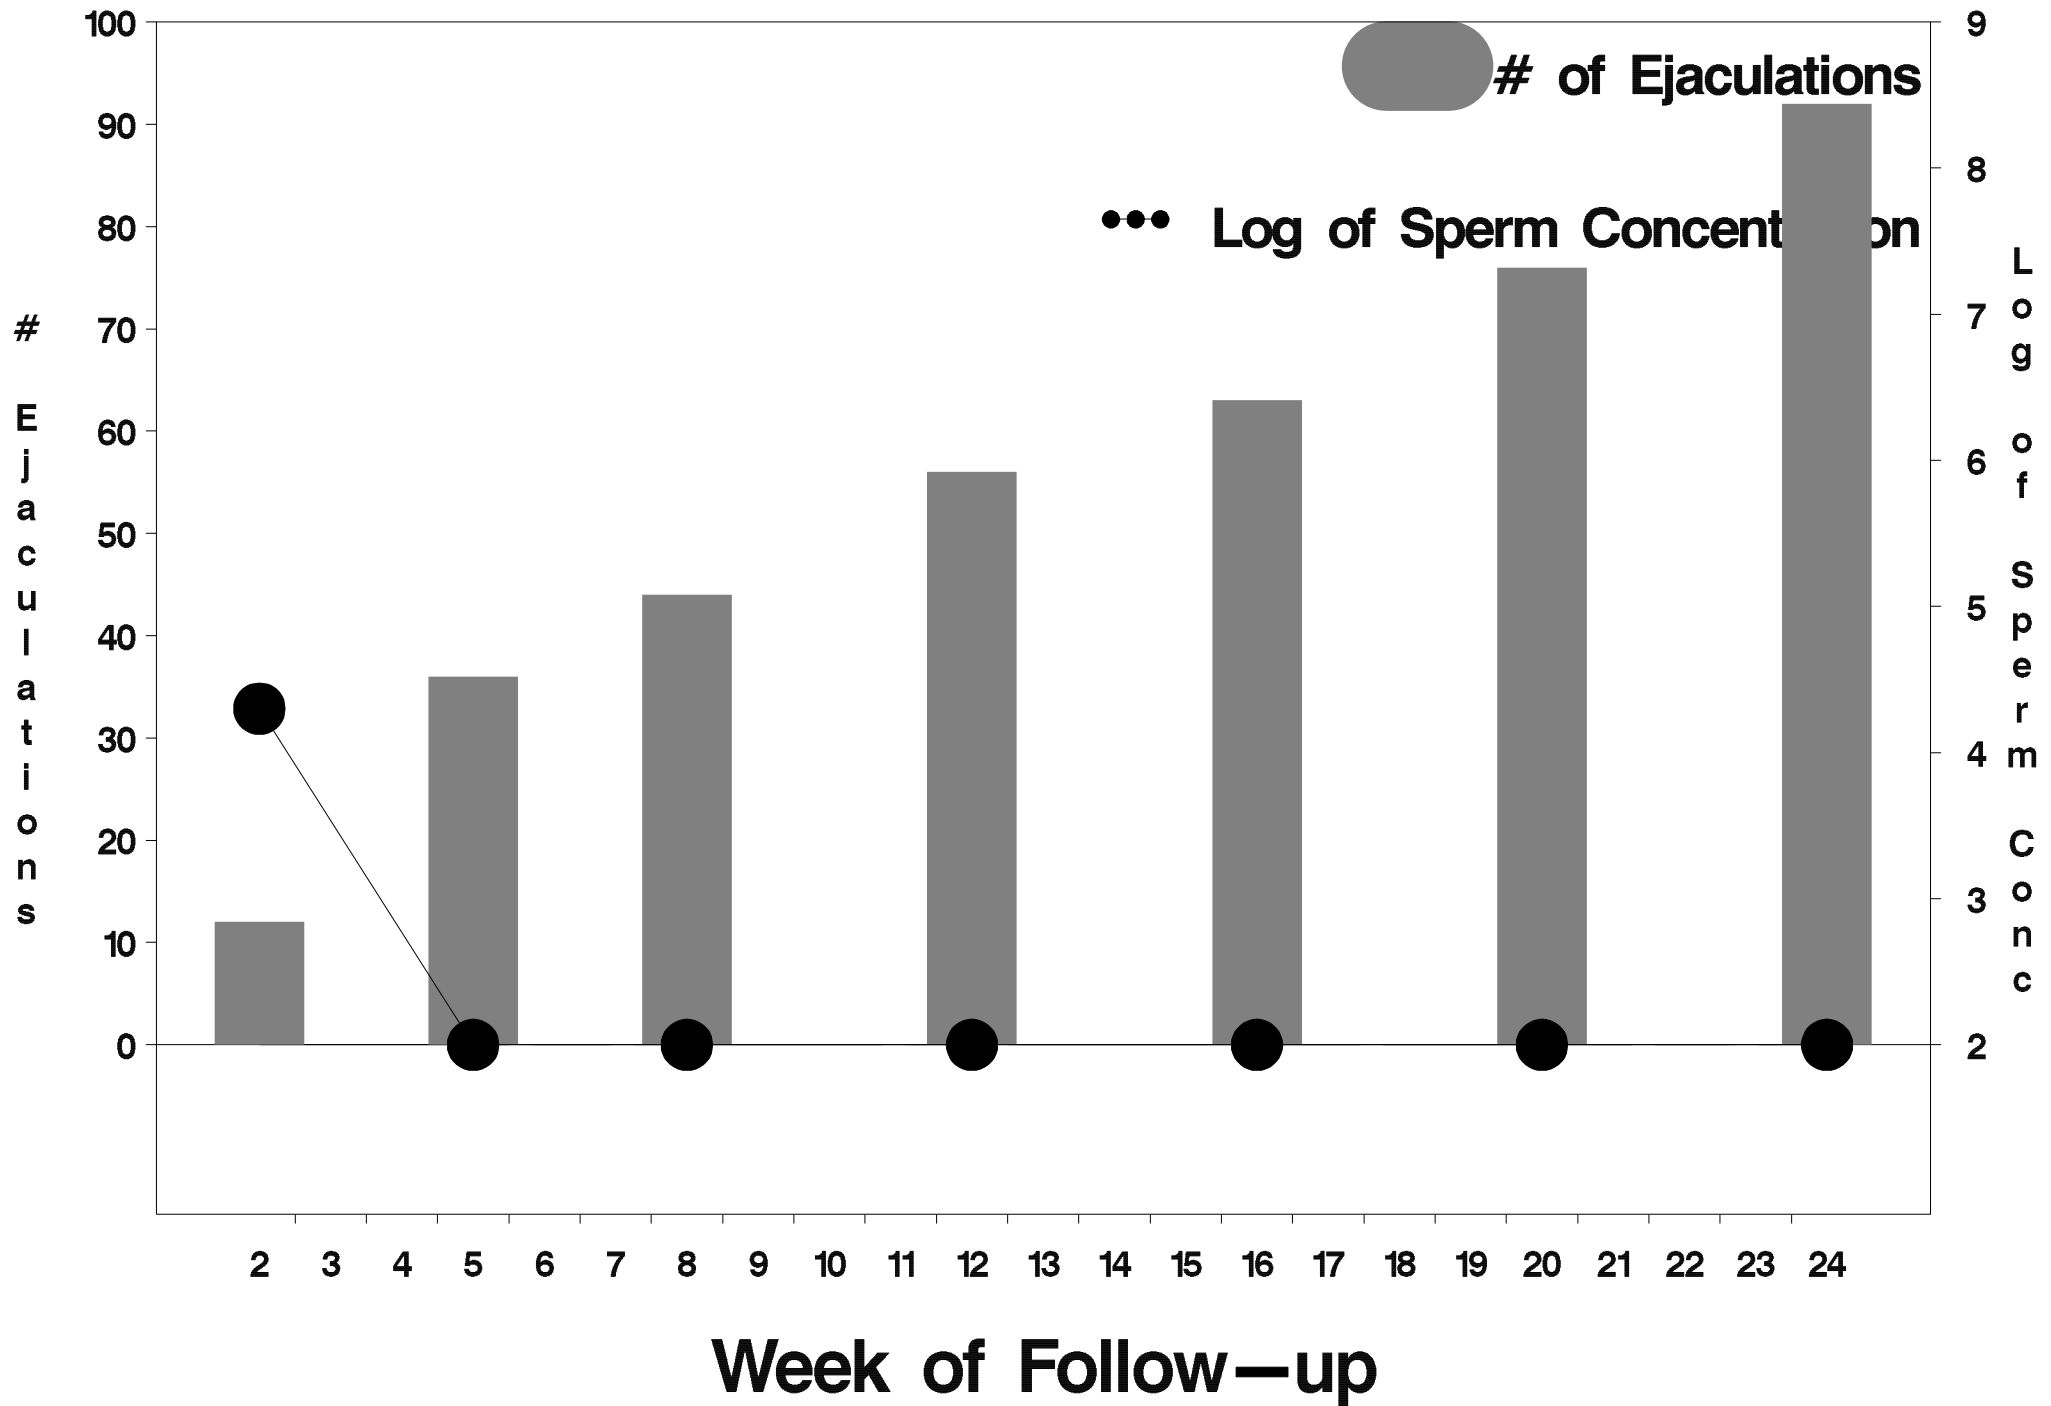

# Participant number= 377

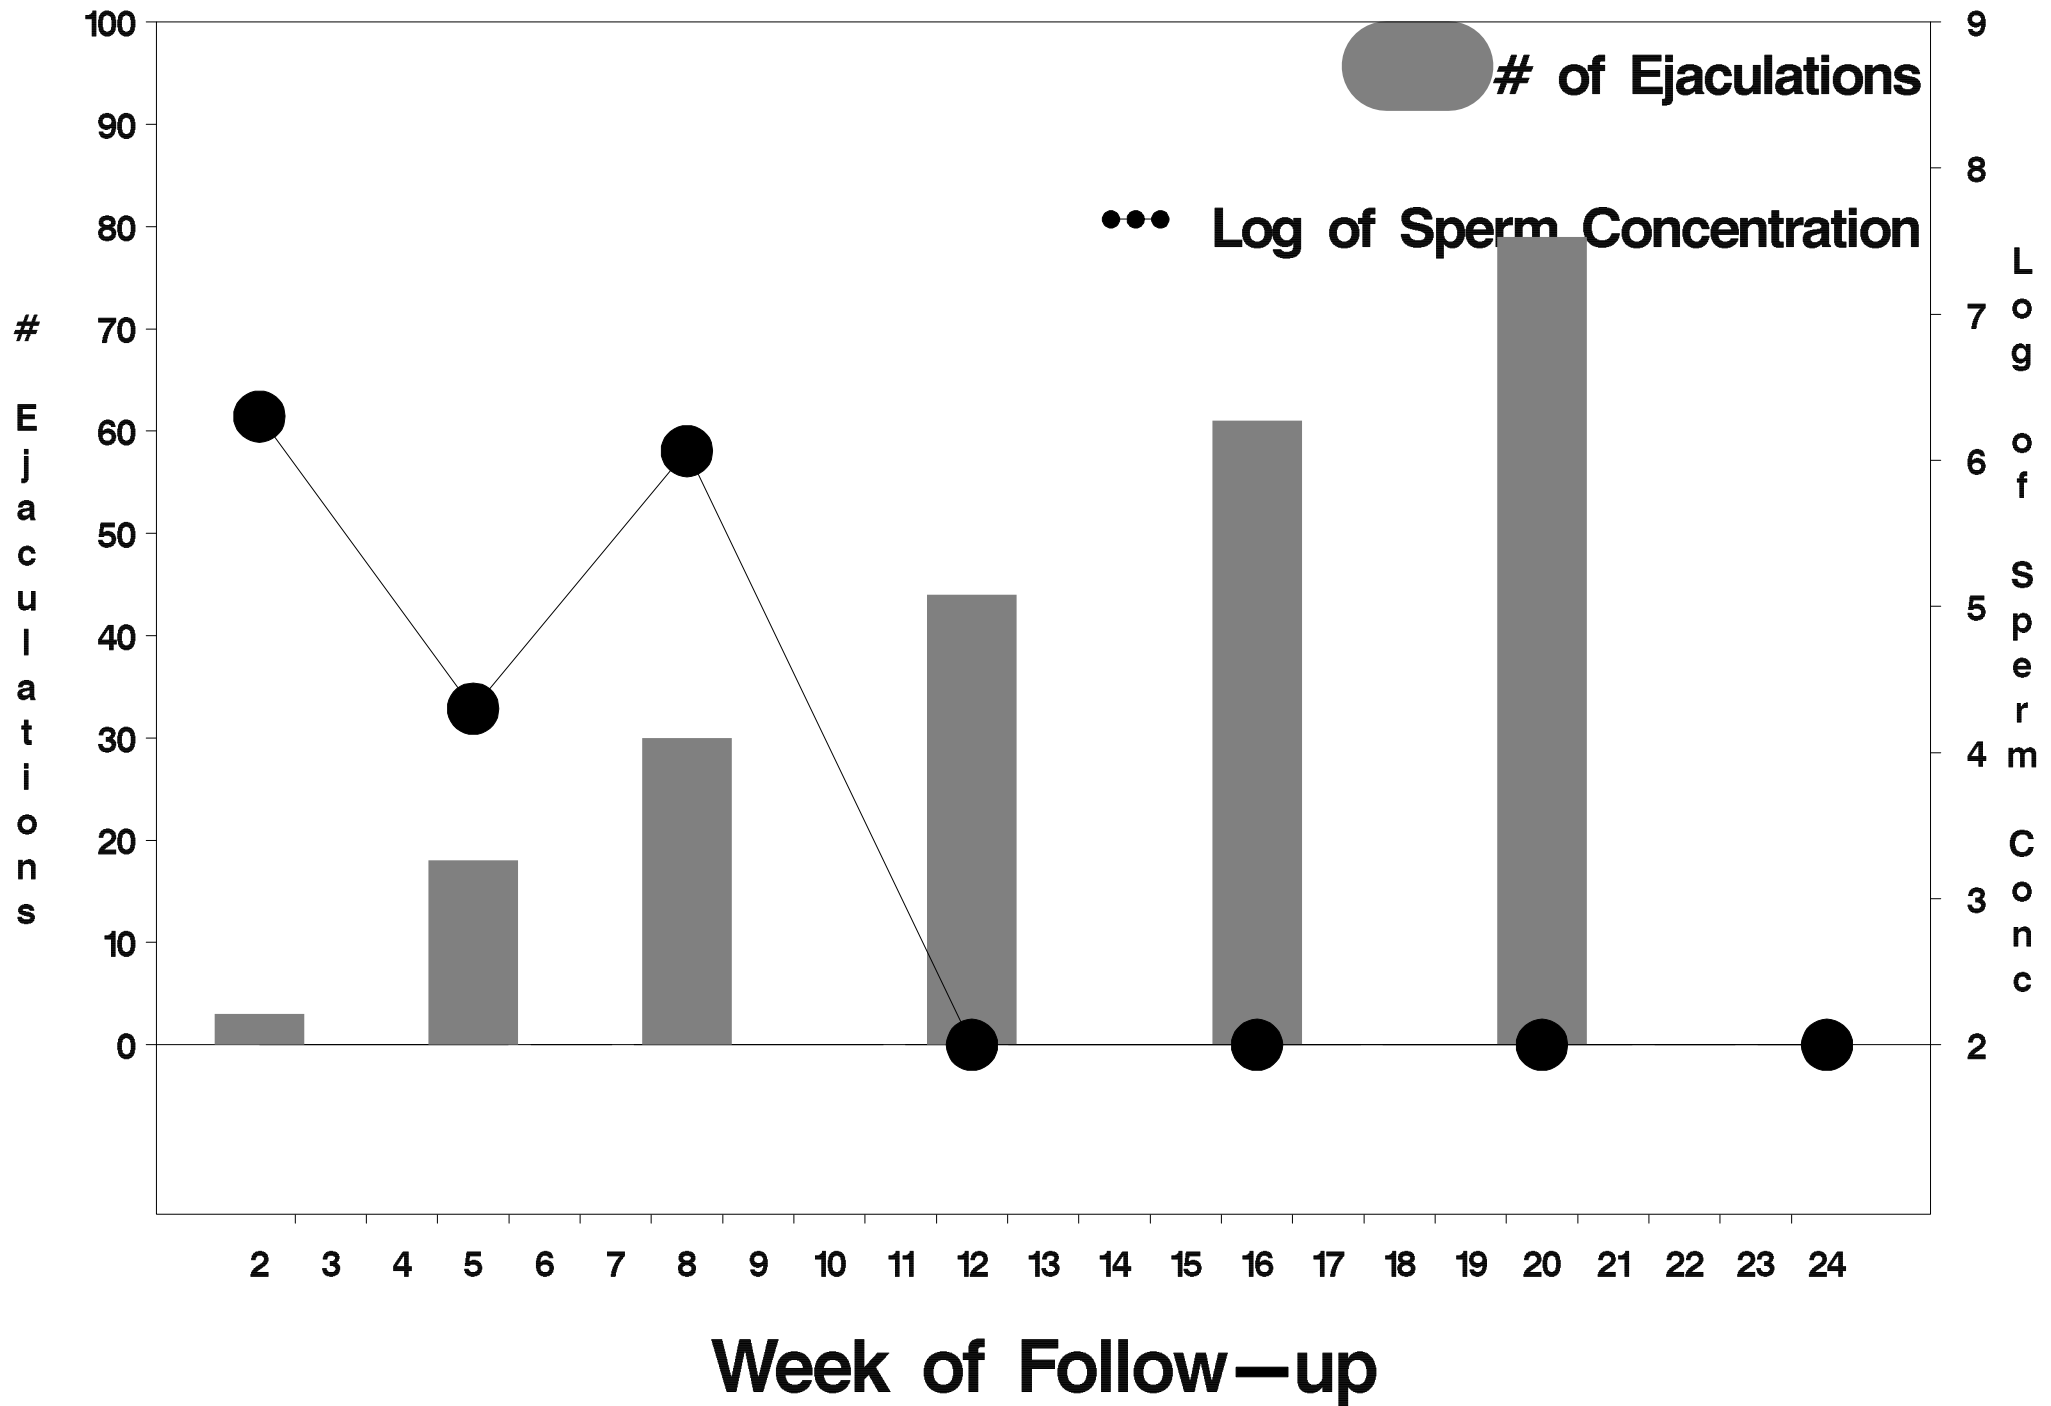



# Participant number= 378

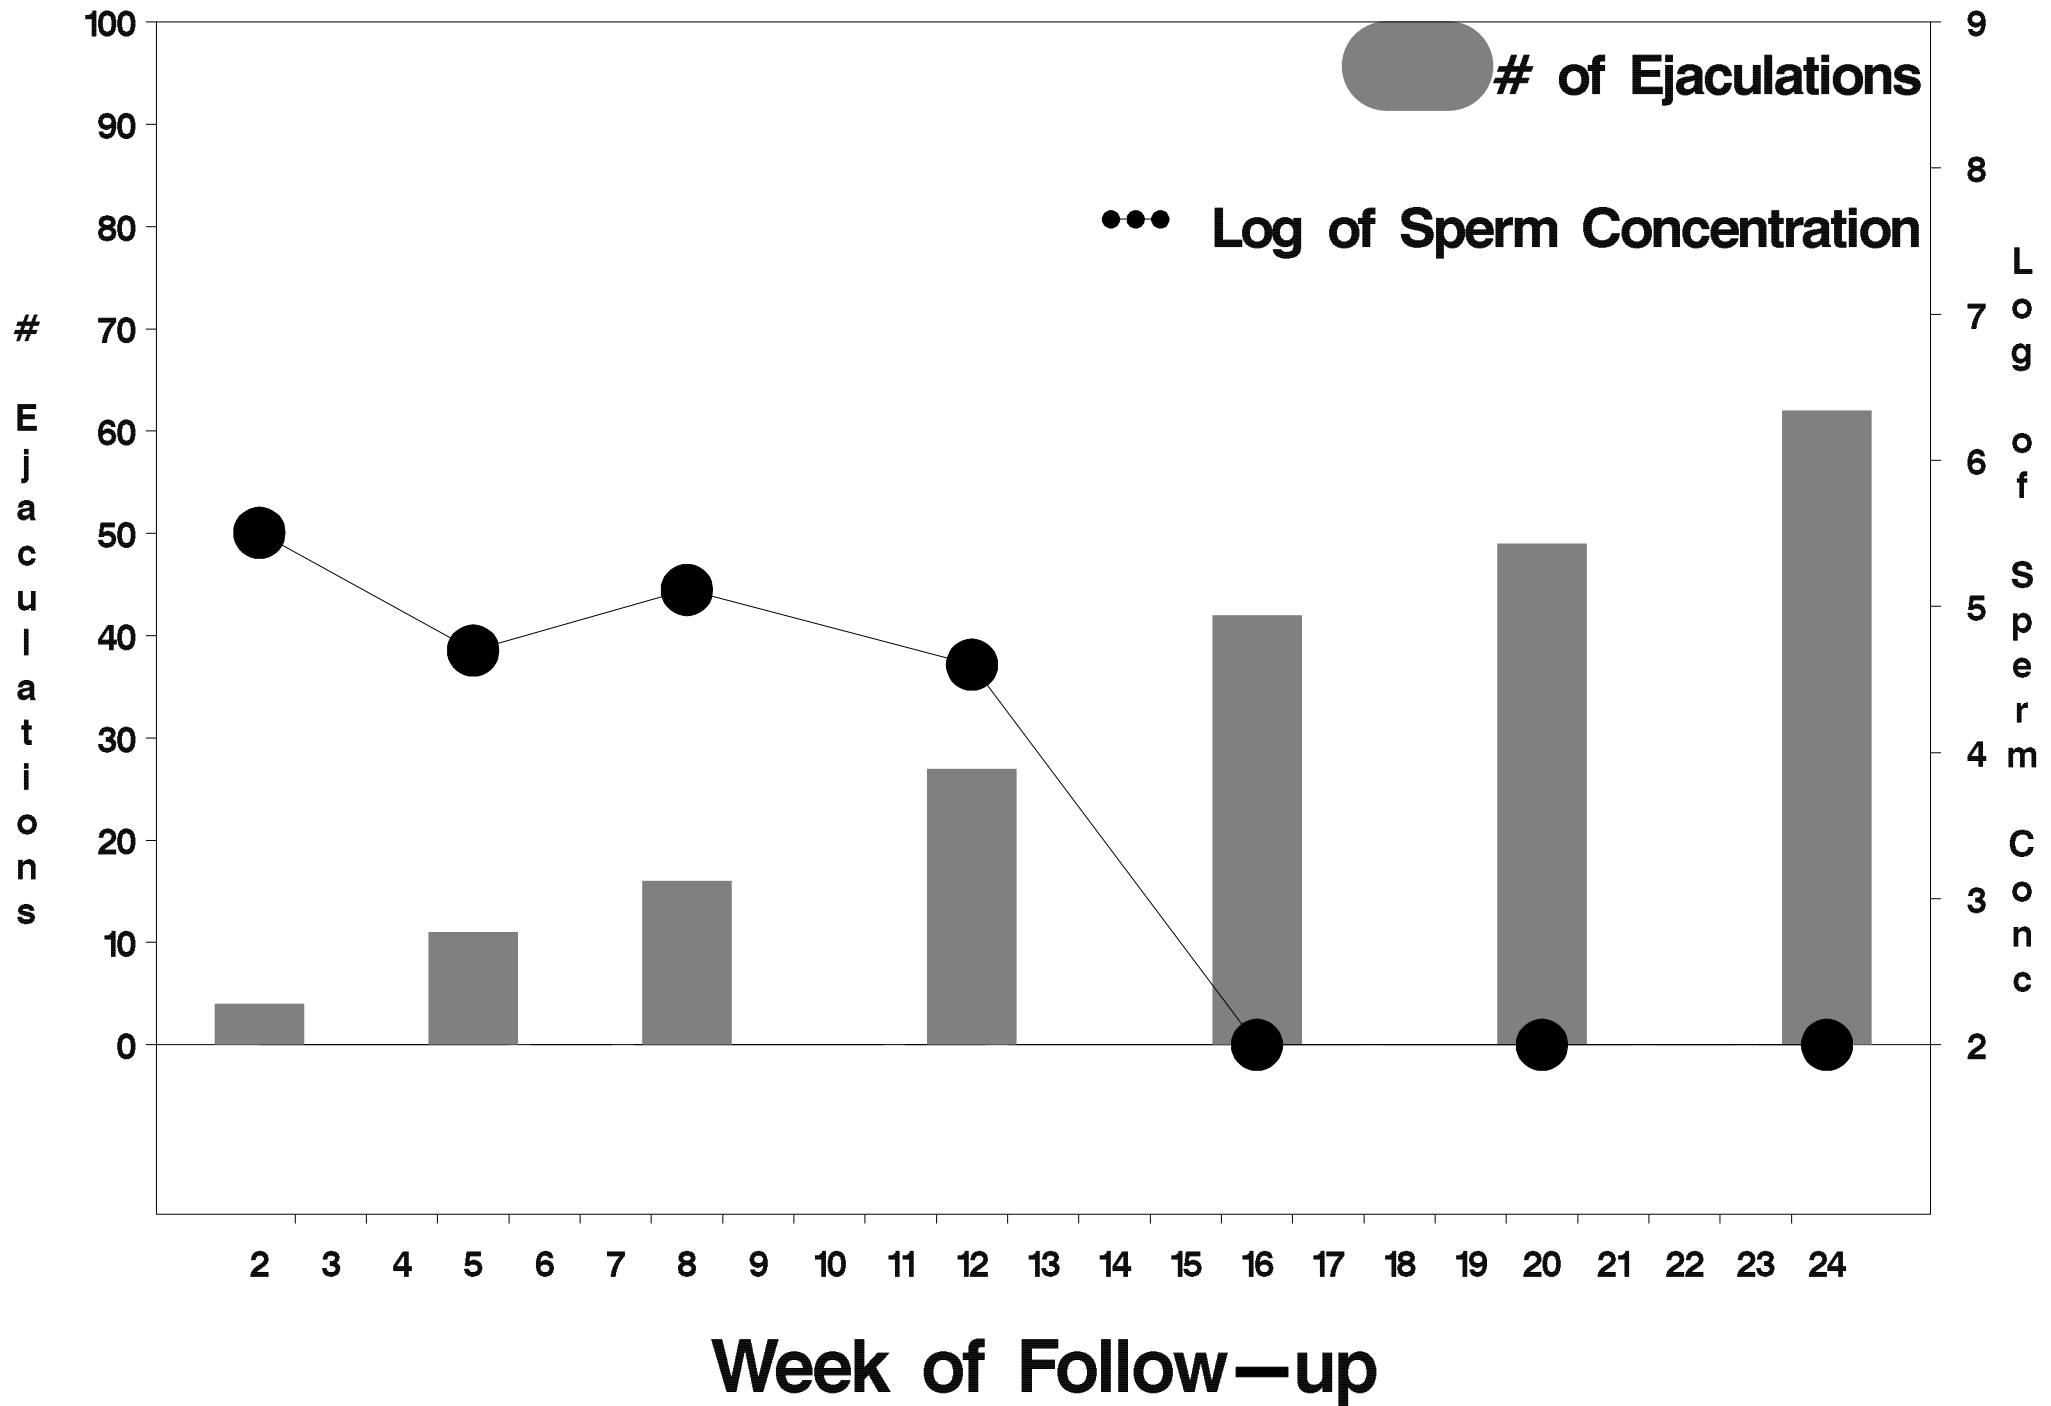

# Participant number= 379

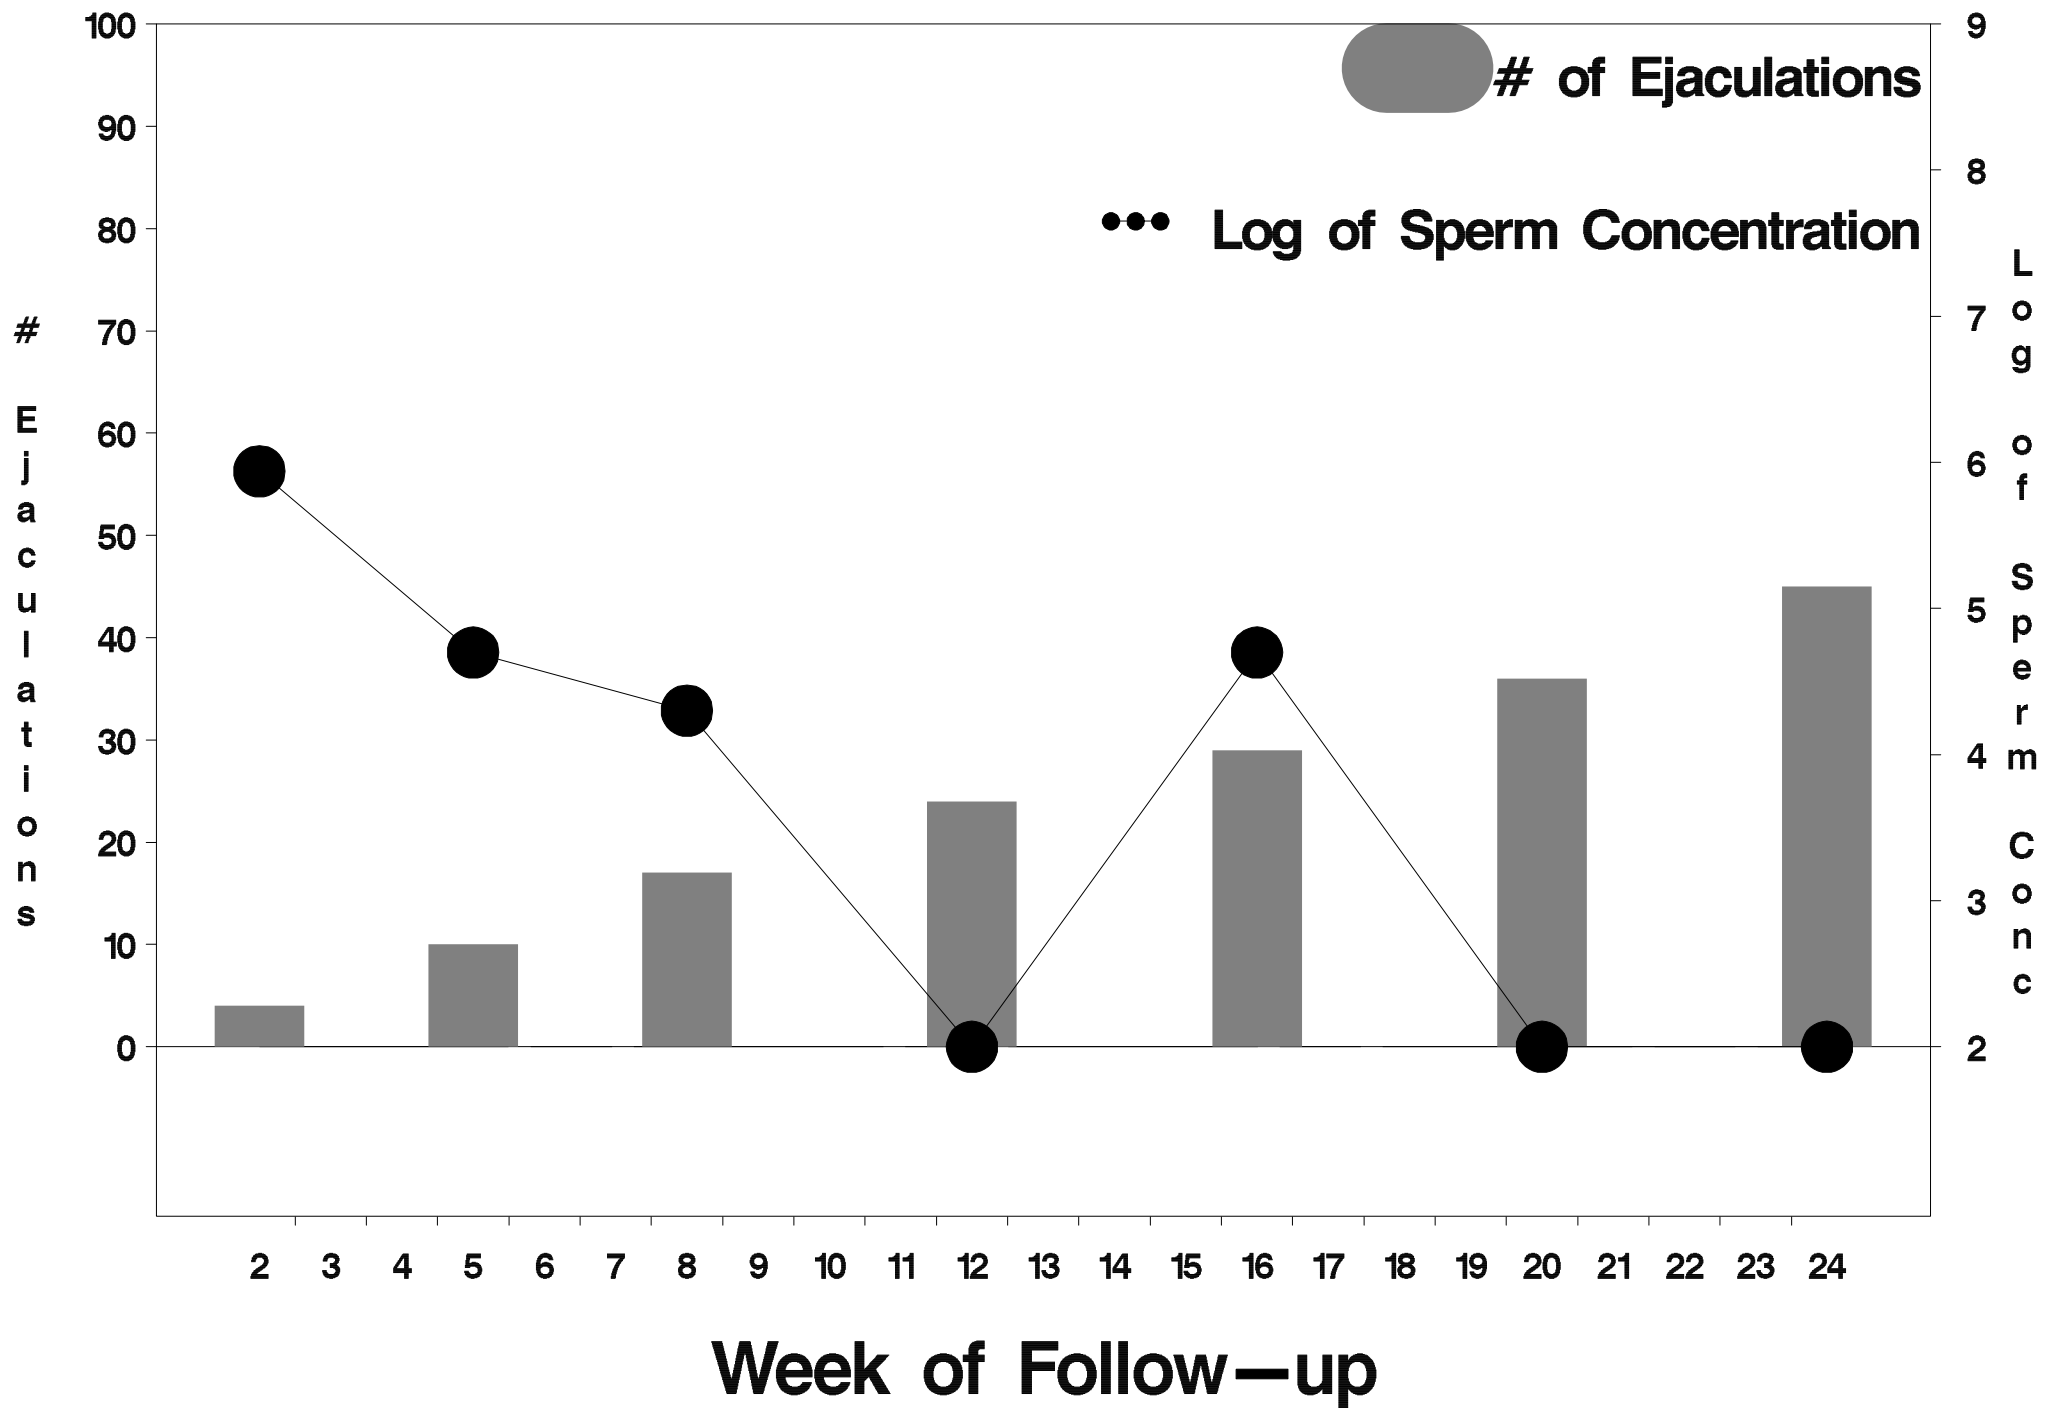

# Participant number= 380

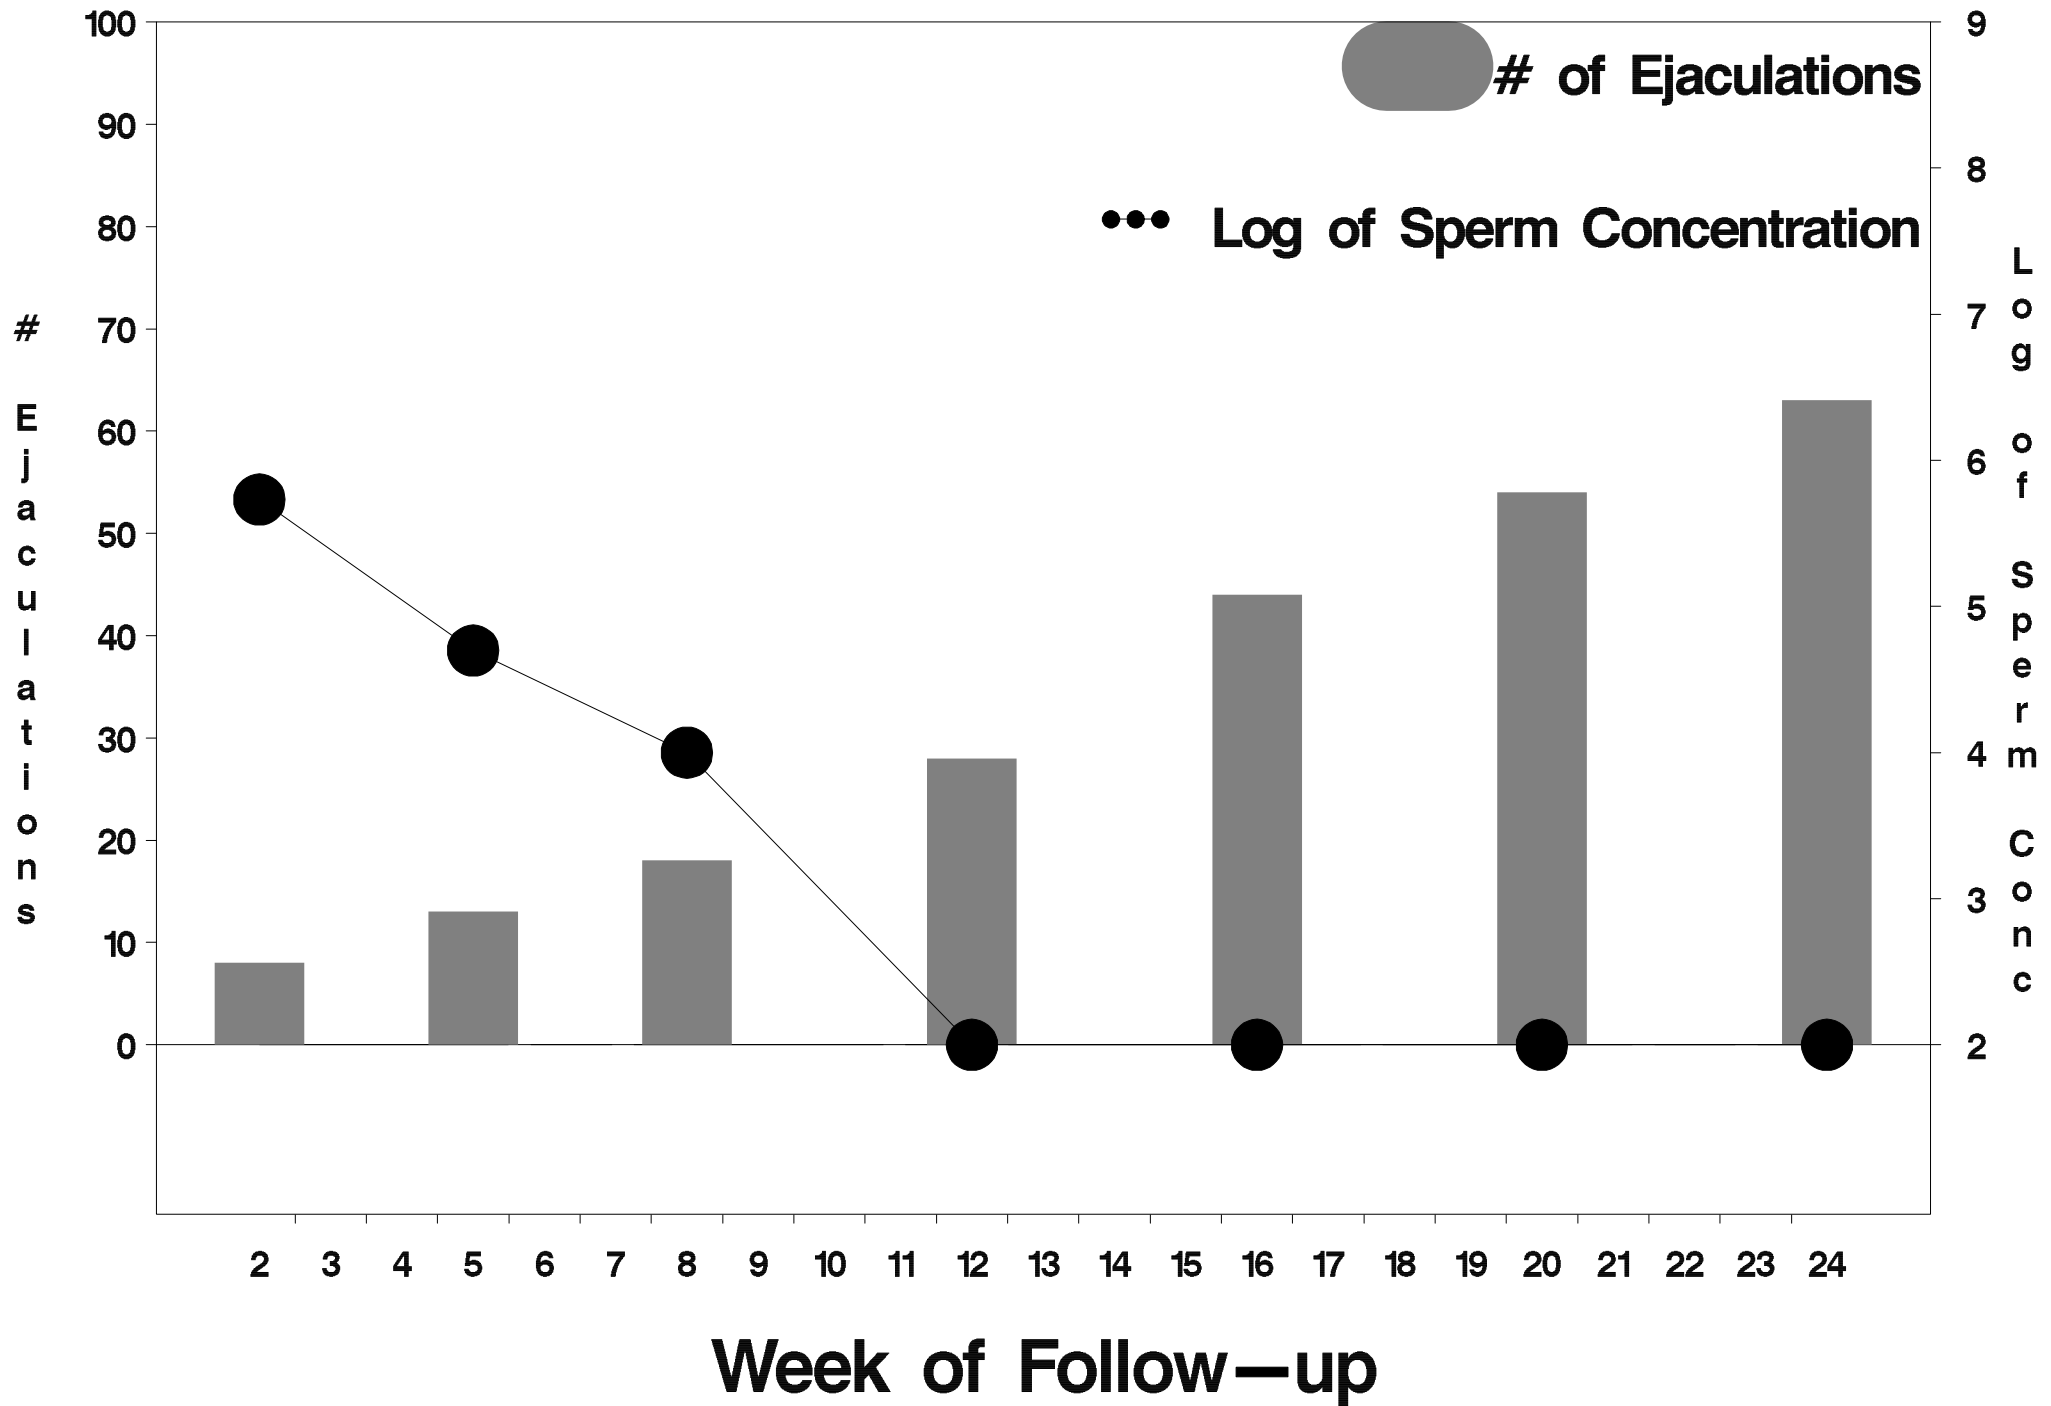

# Participant number= 381

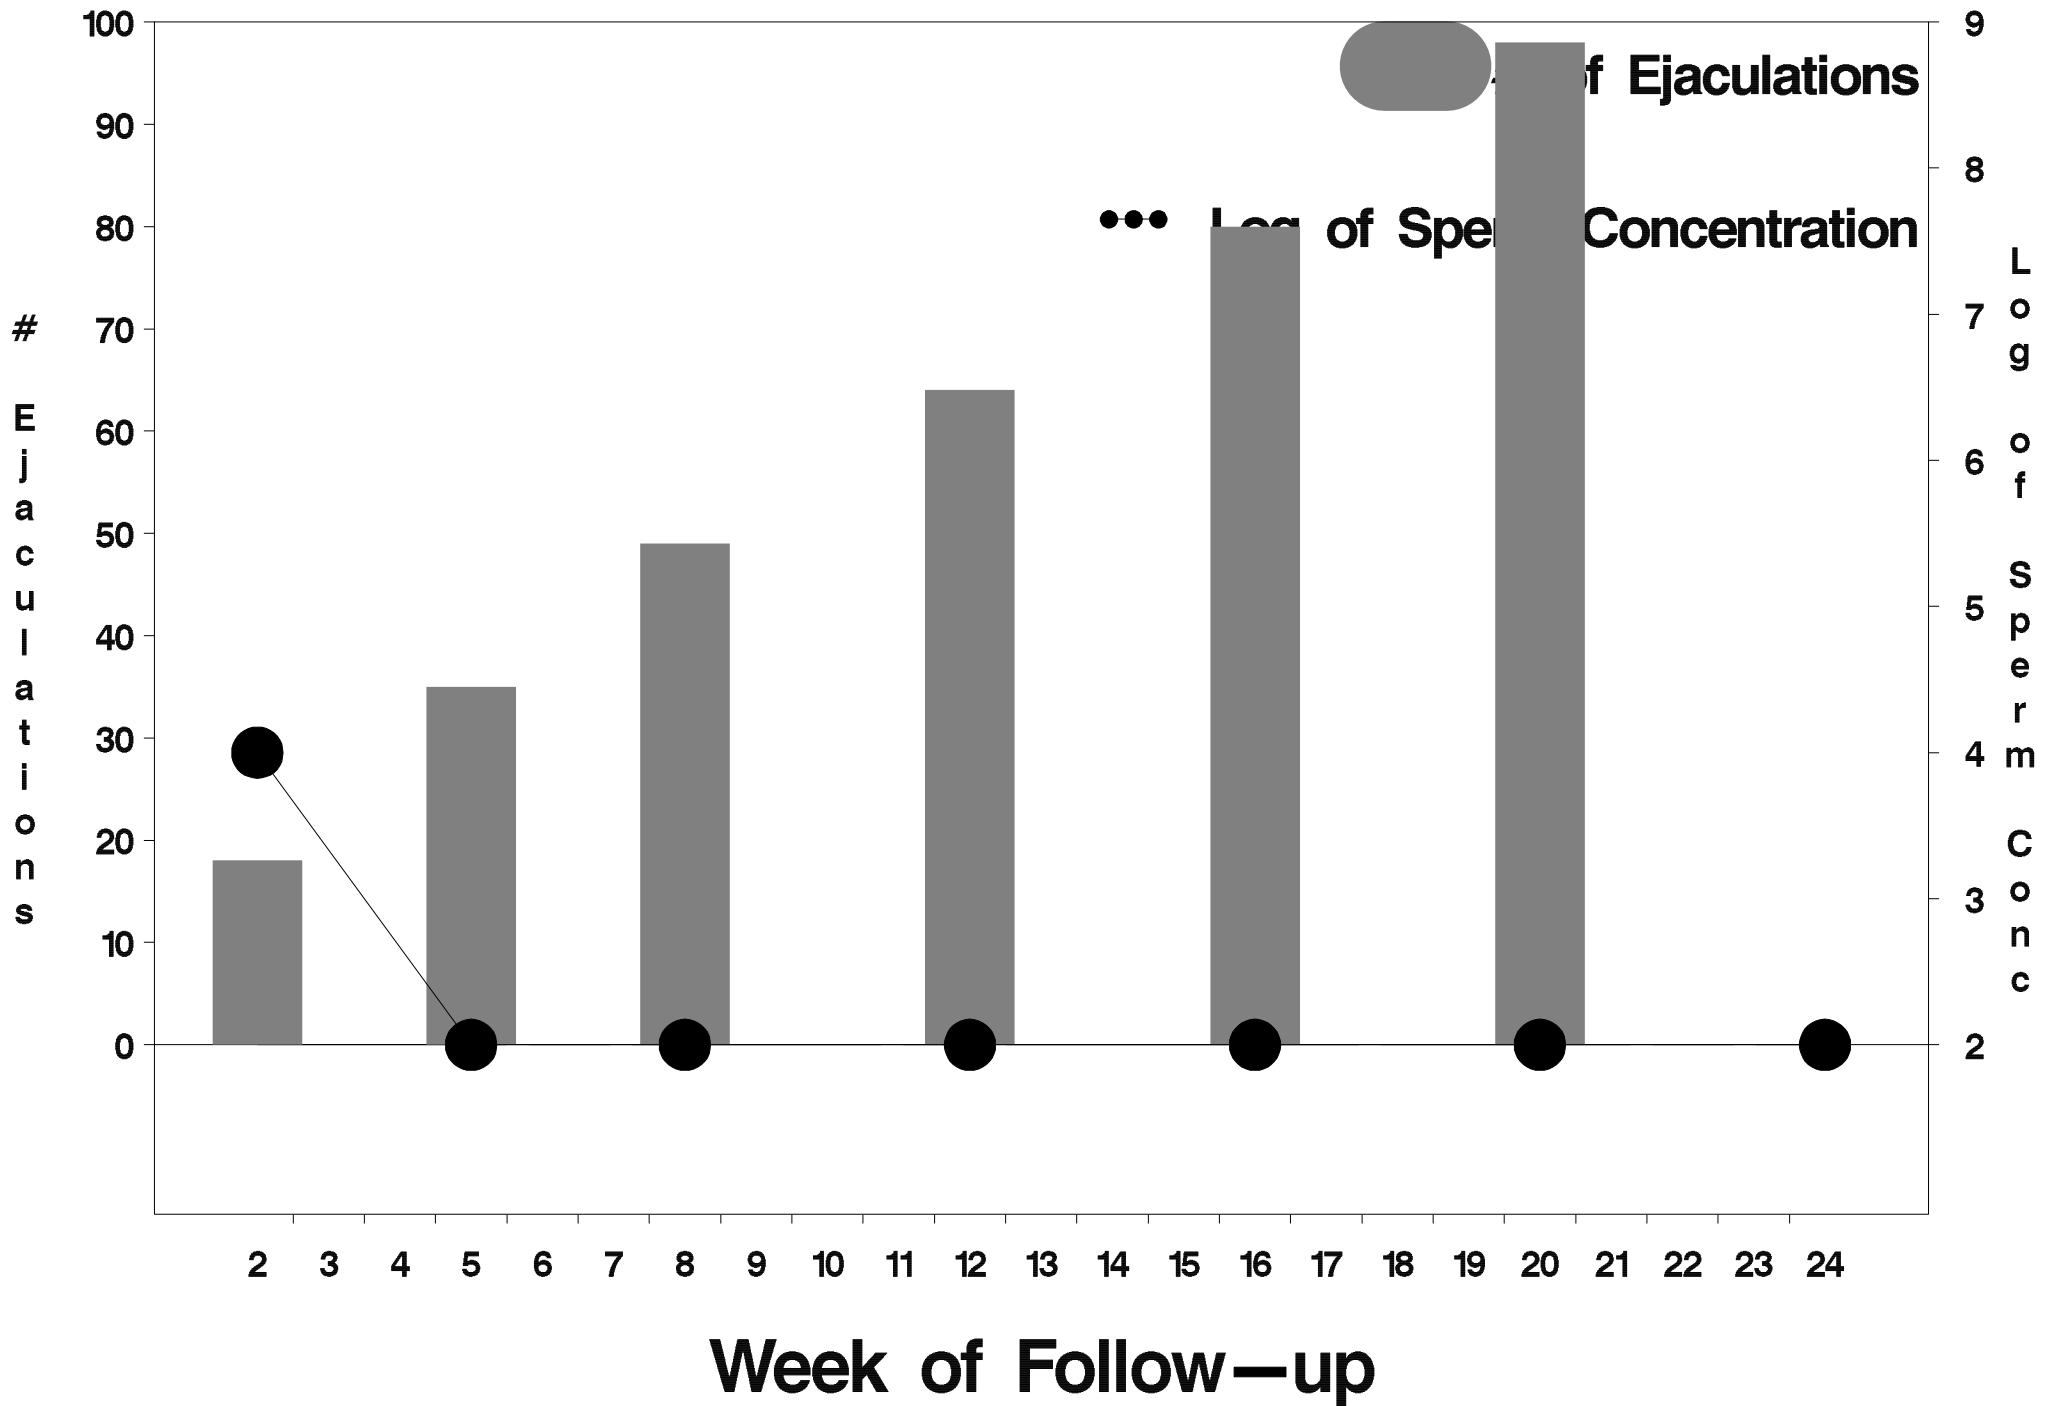

# Participant number= 382

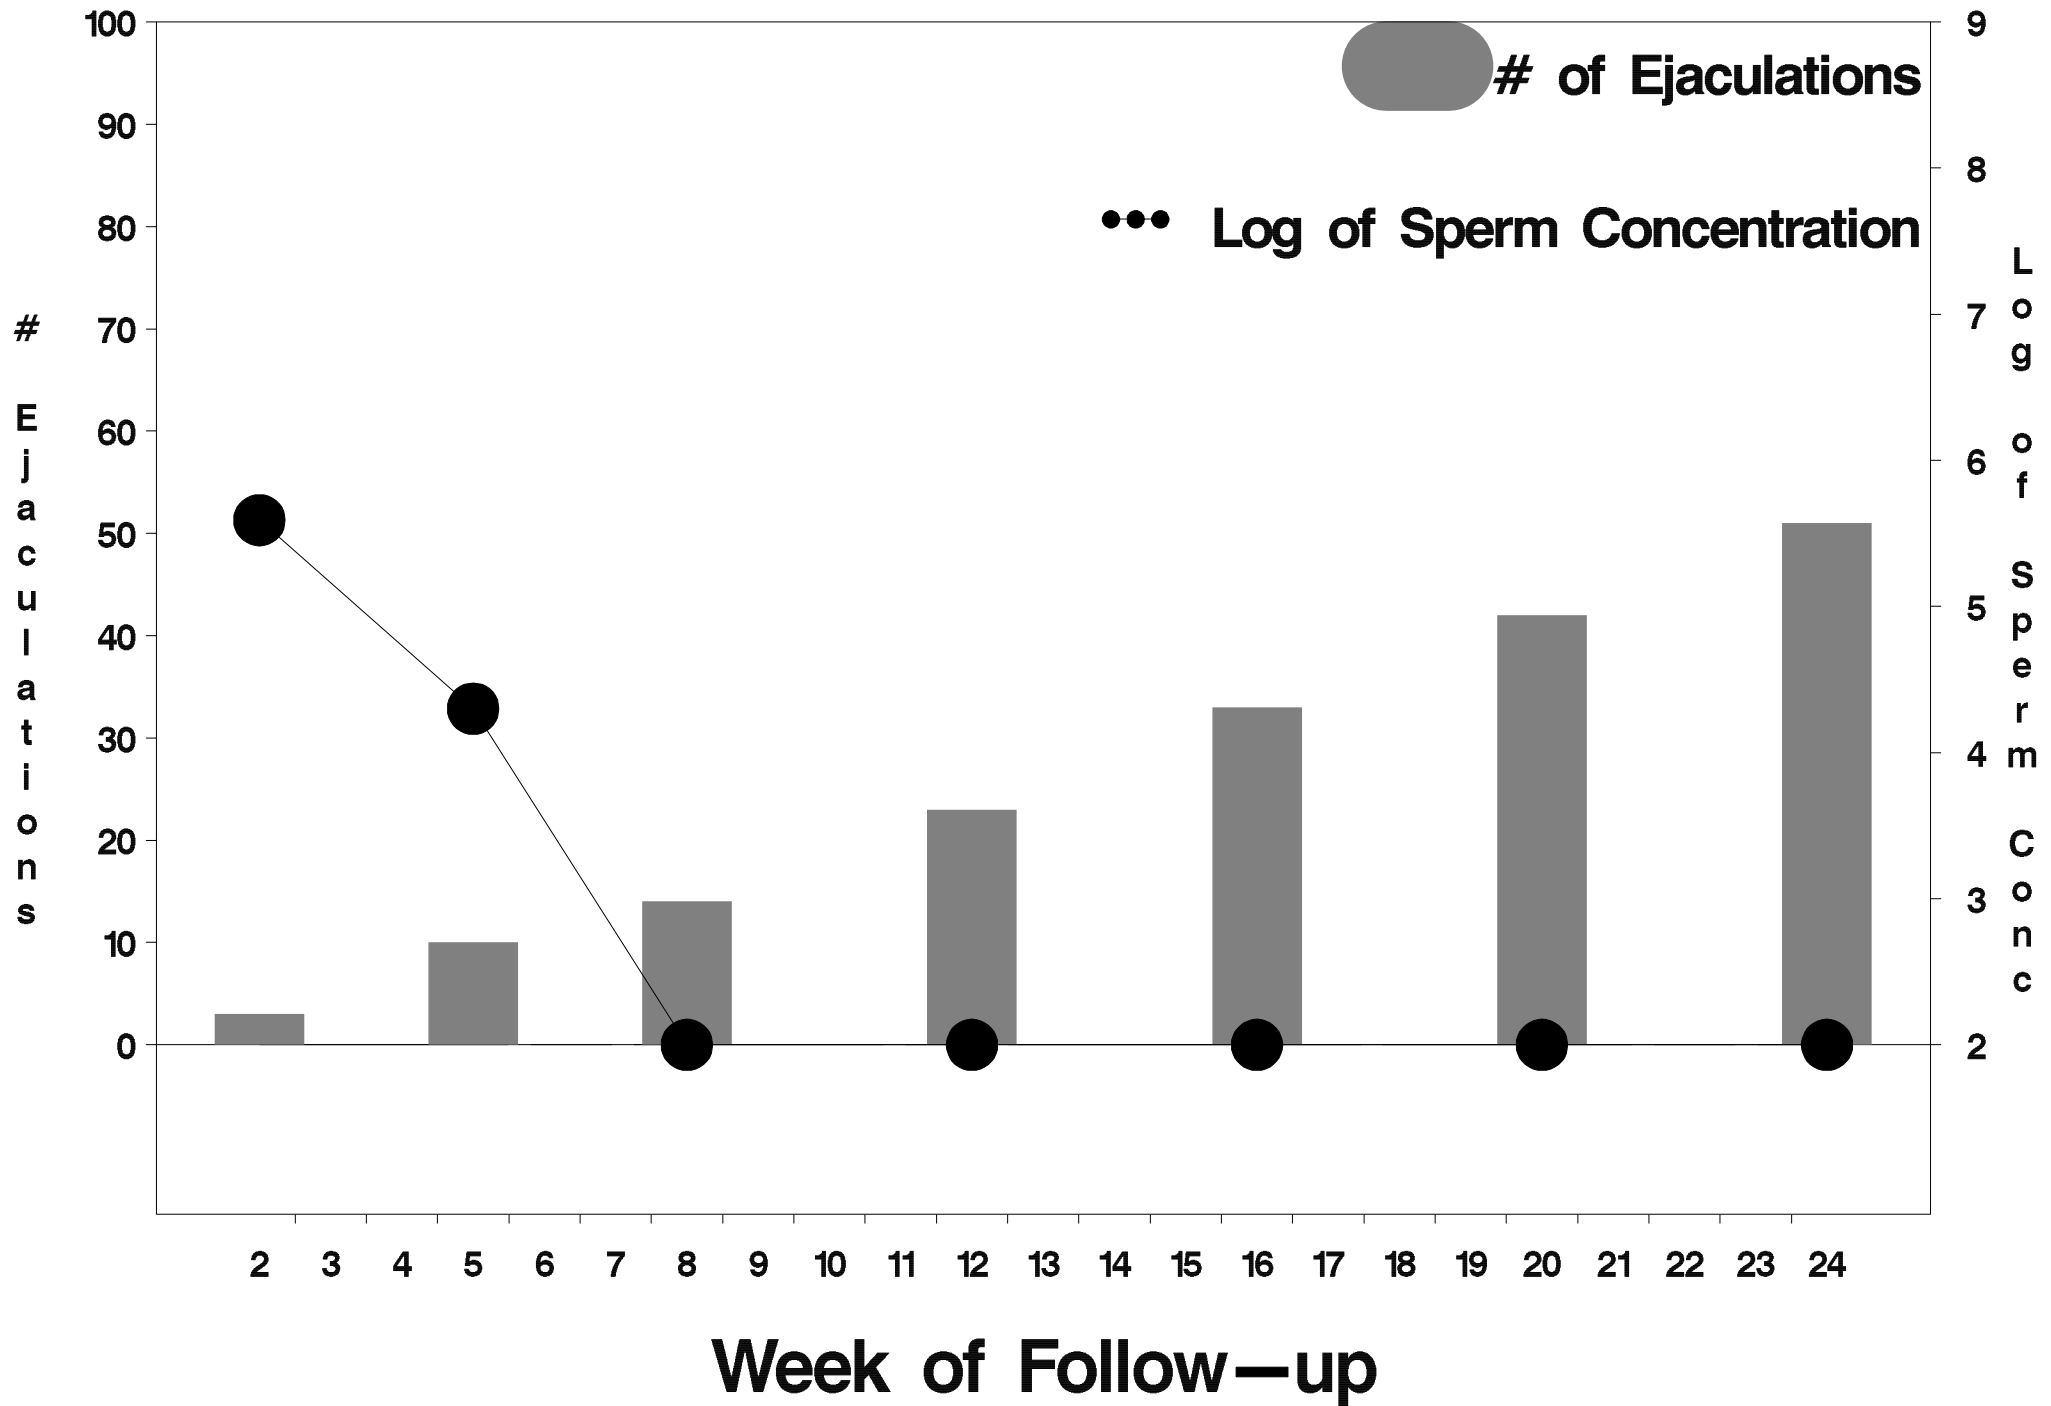

# Participant number= 383

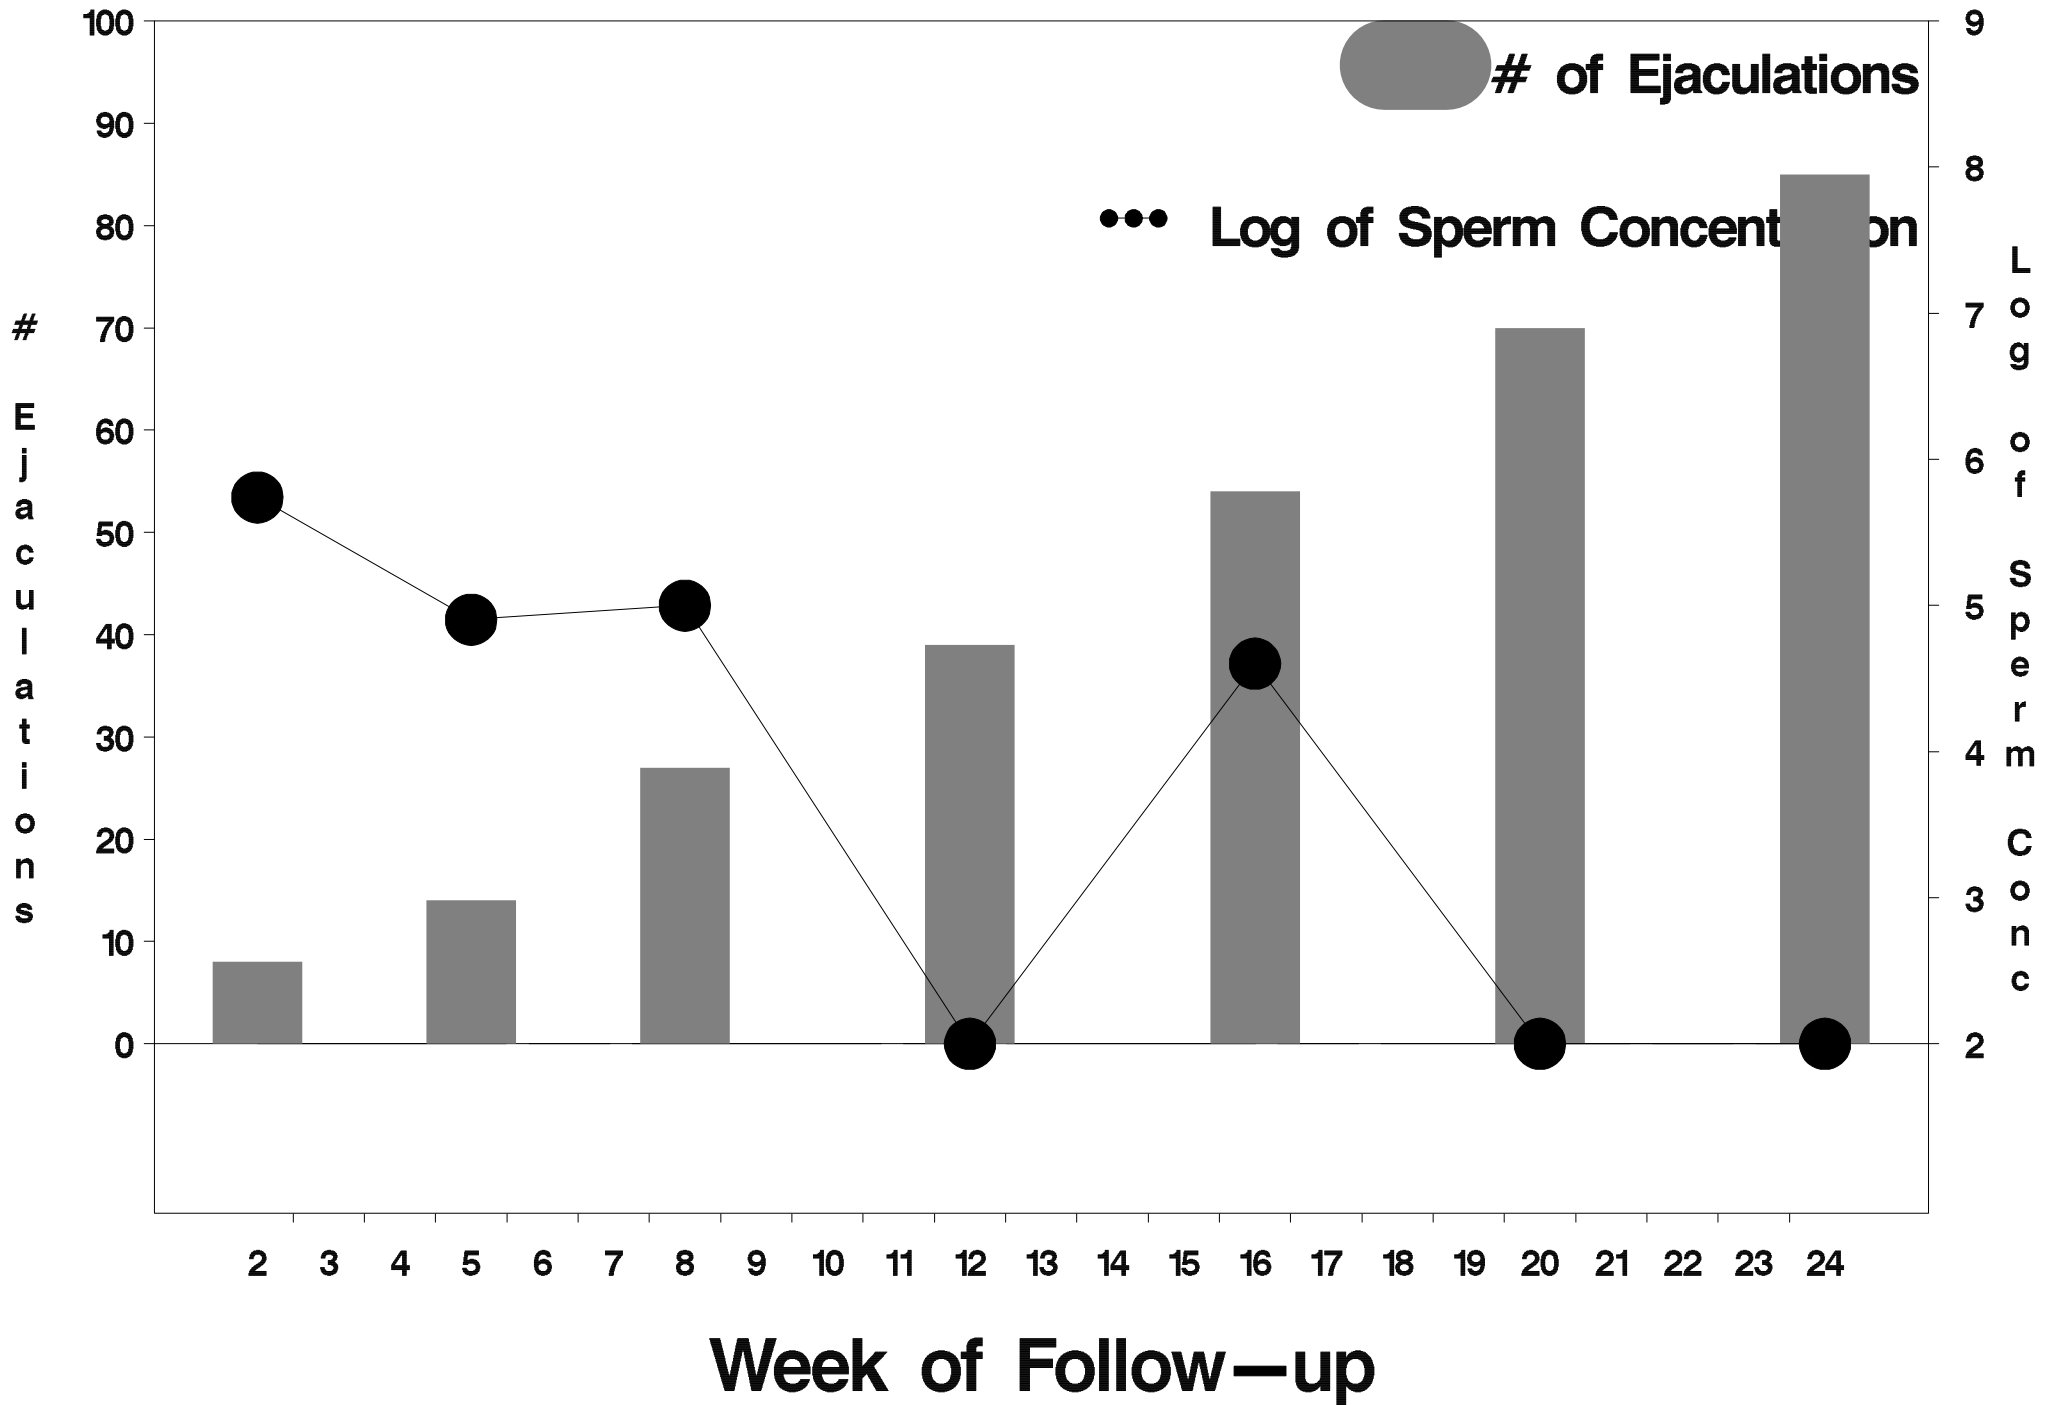

# Participant number= 384

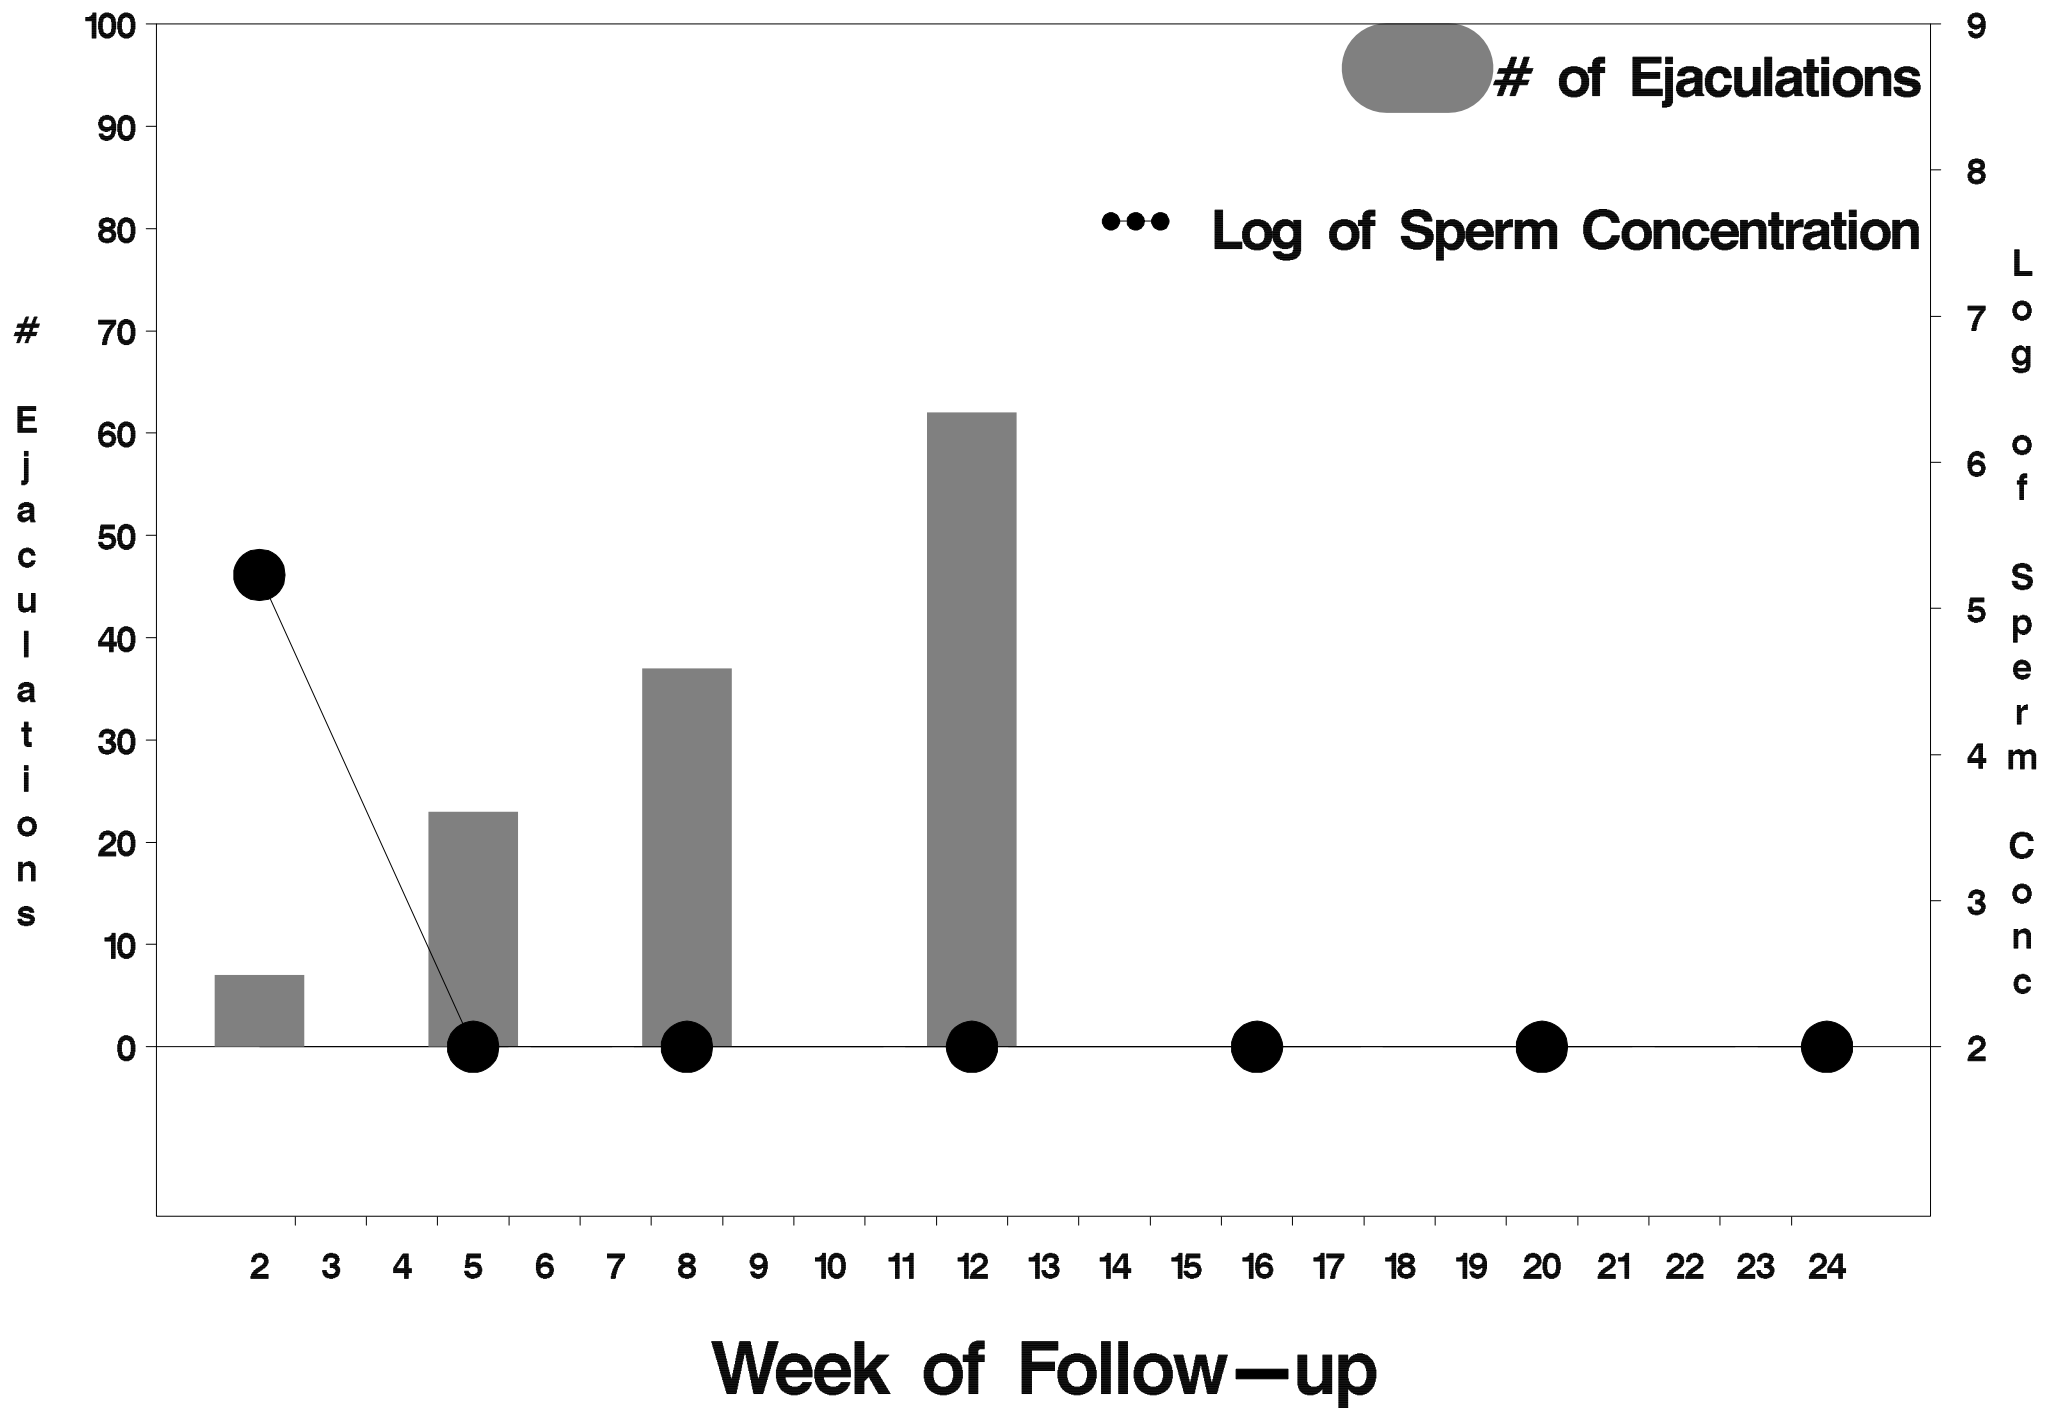

# Participant number= 385

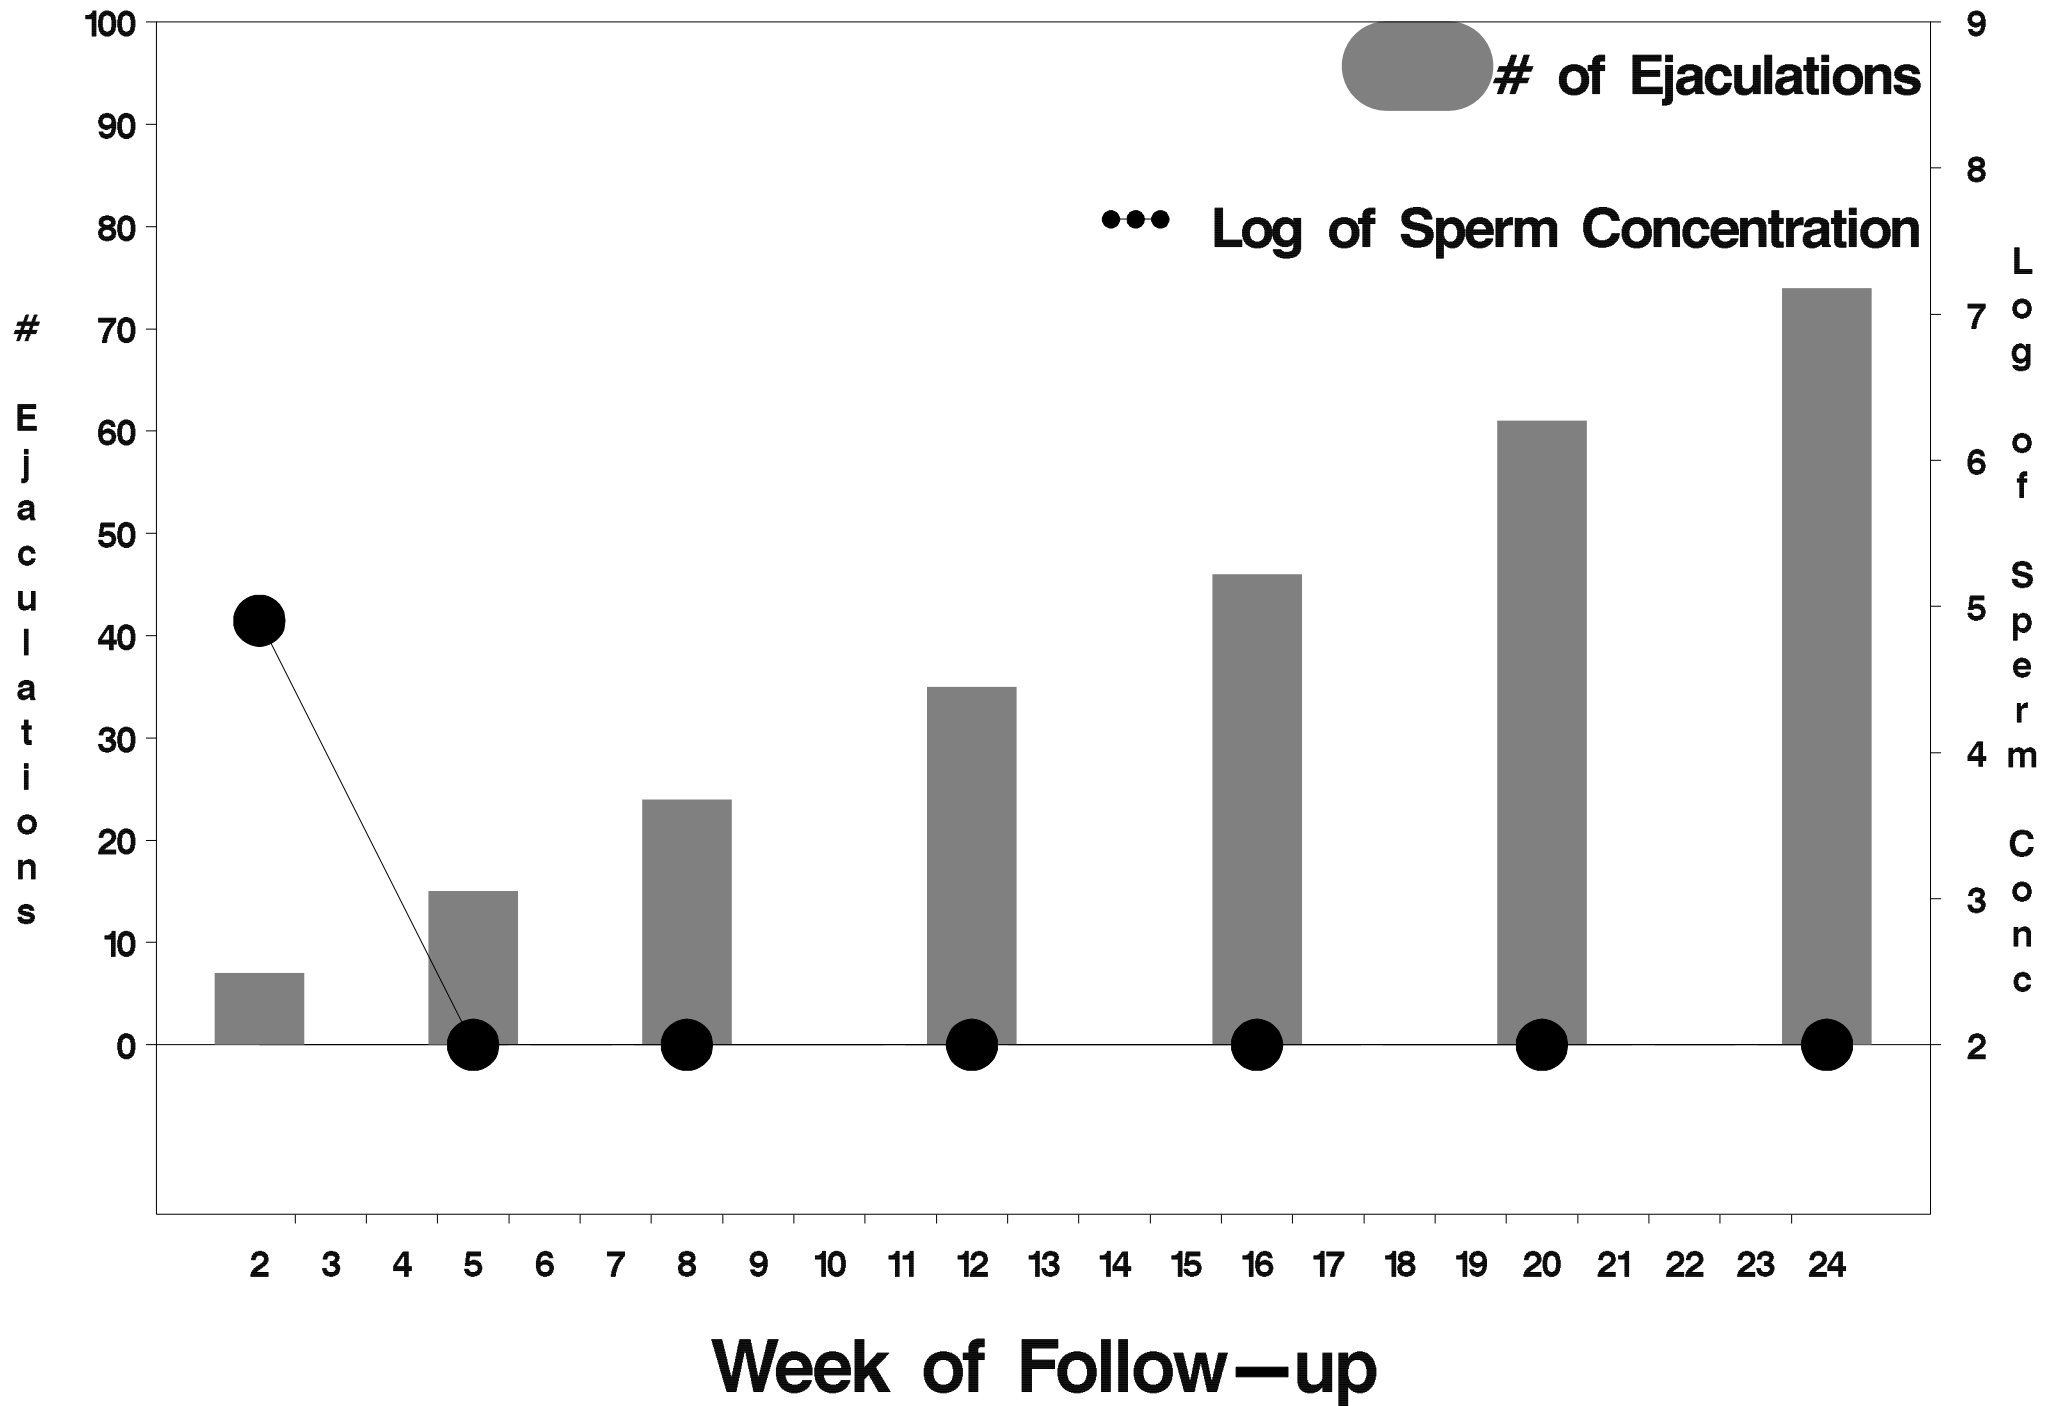



# Participant number= 386

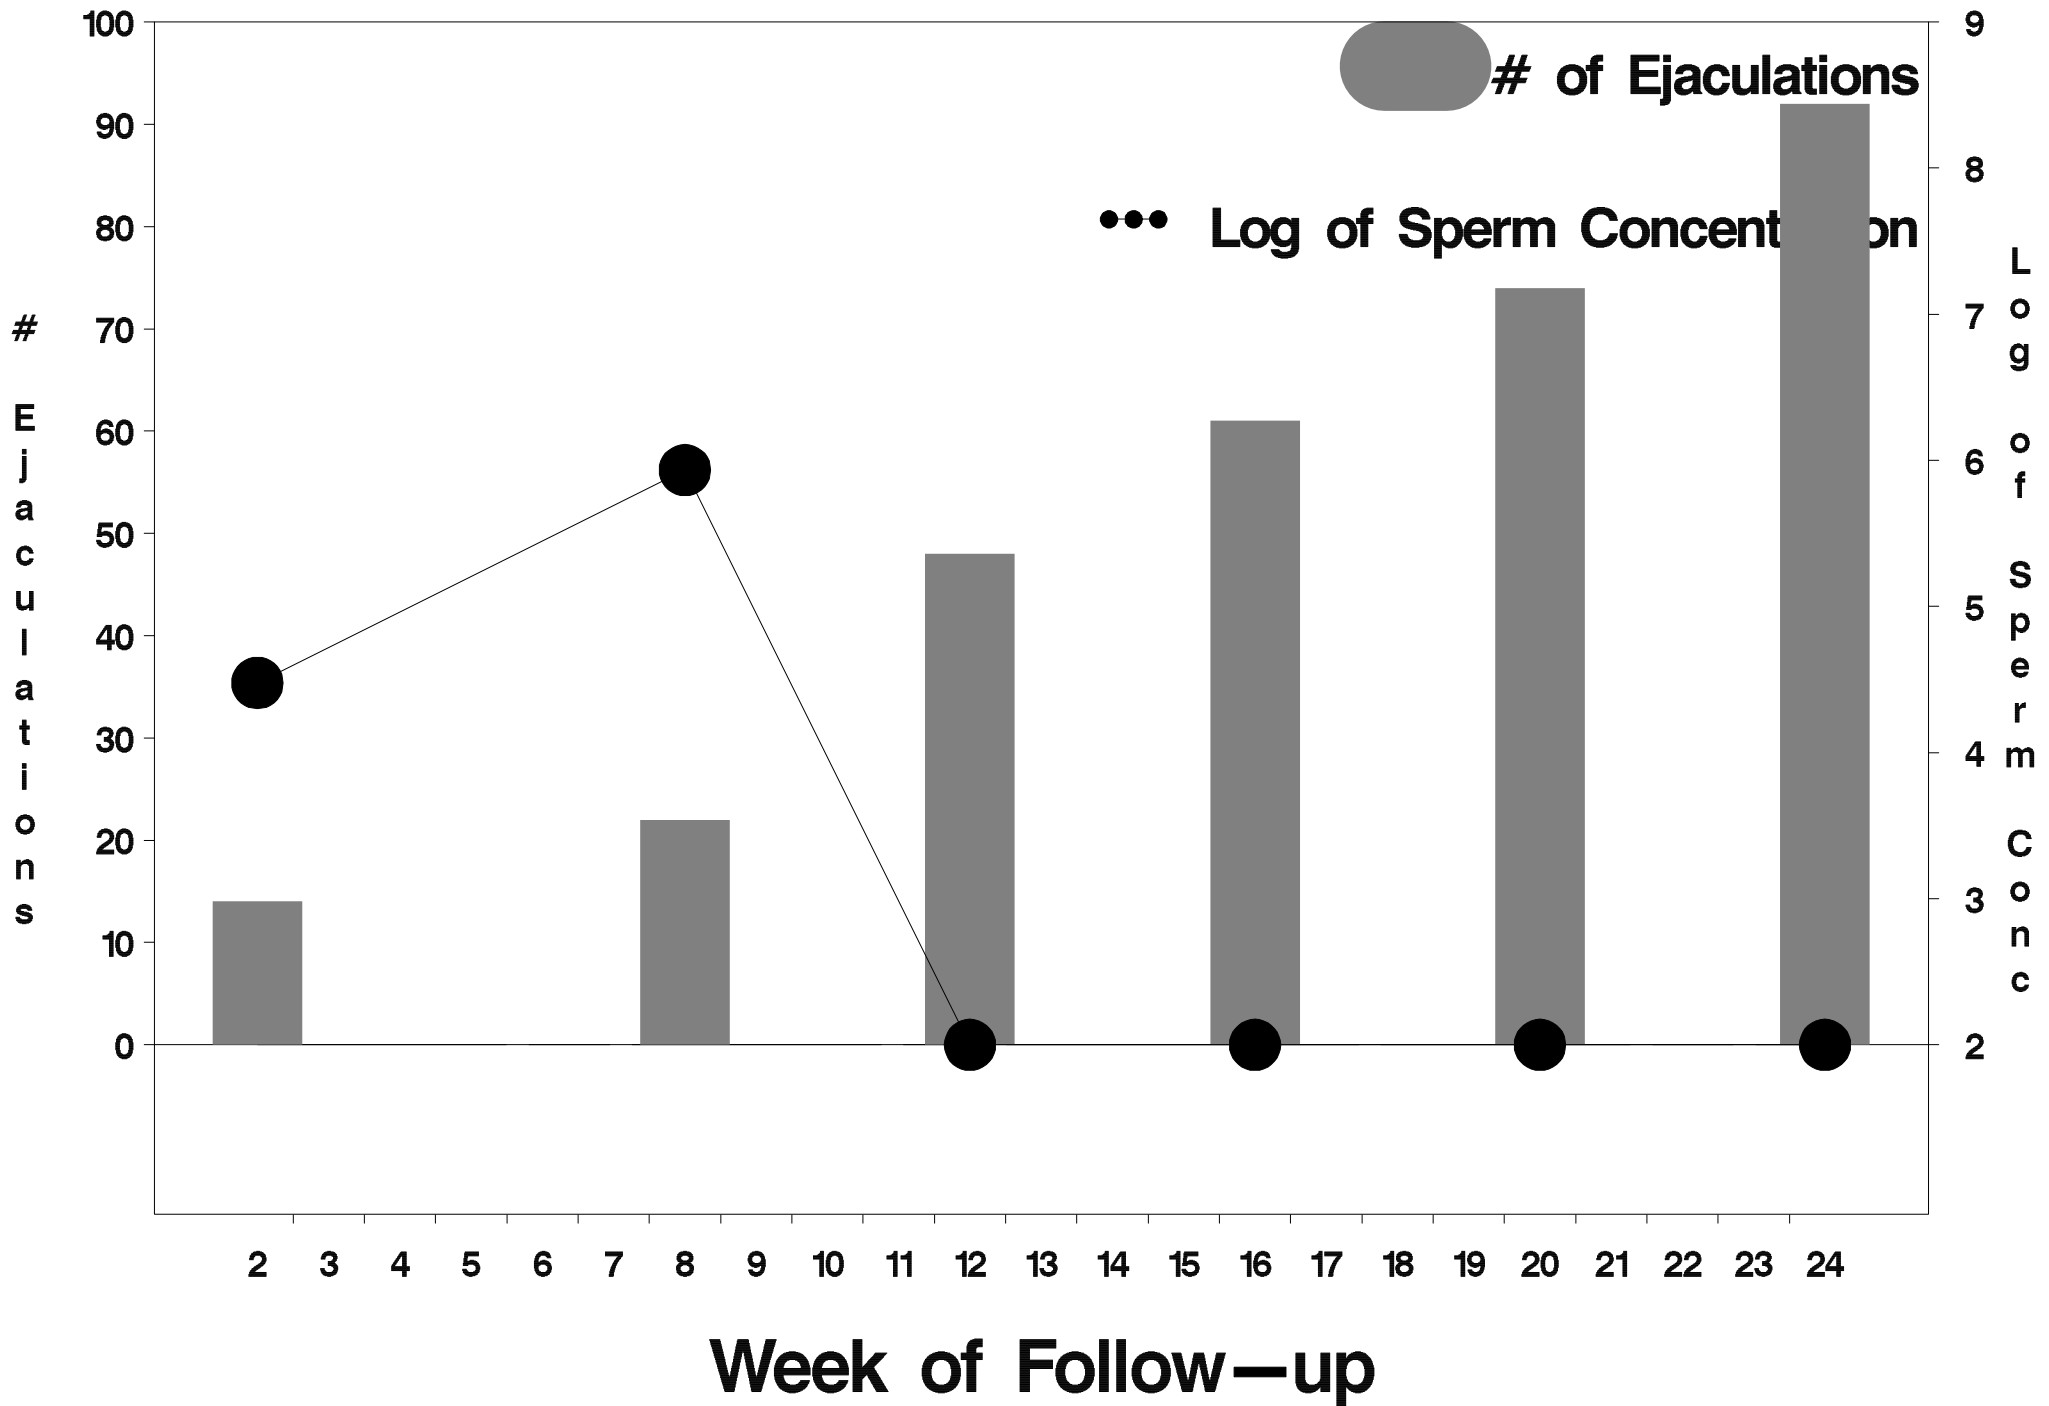

# Participant number= 387

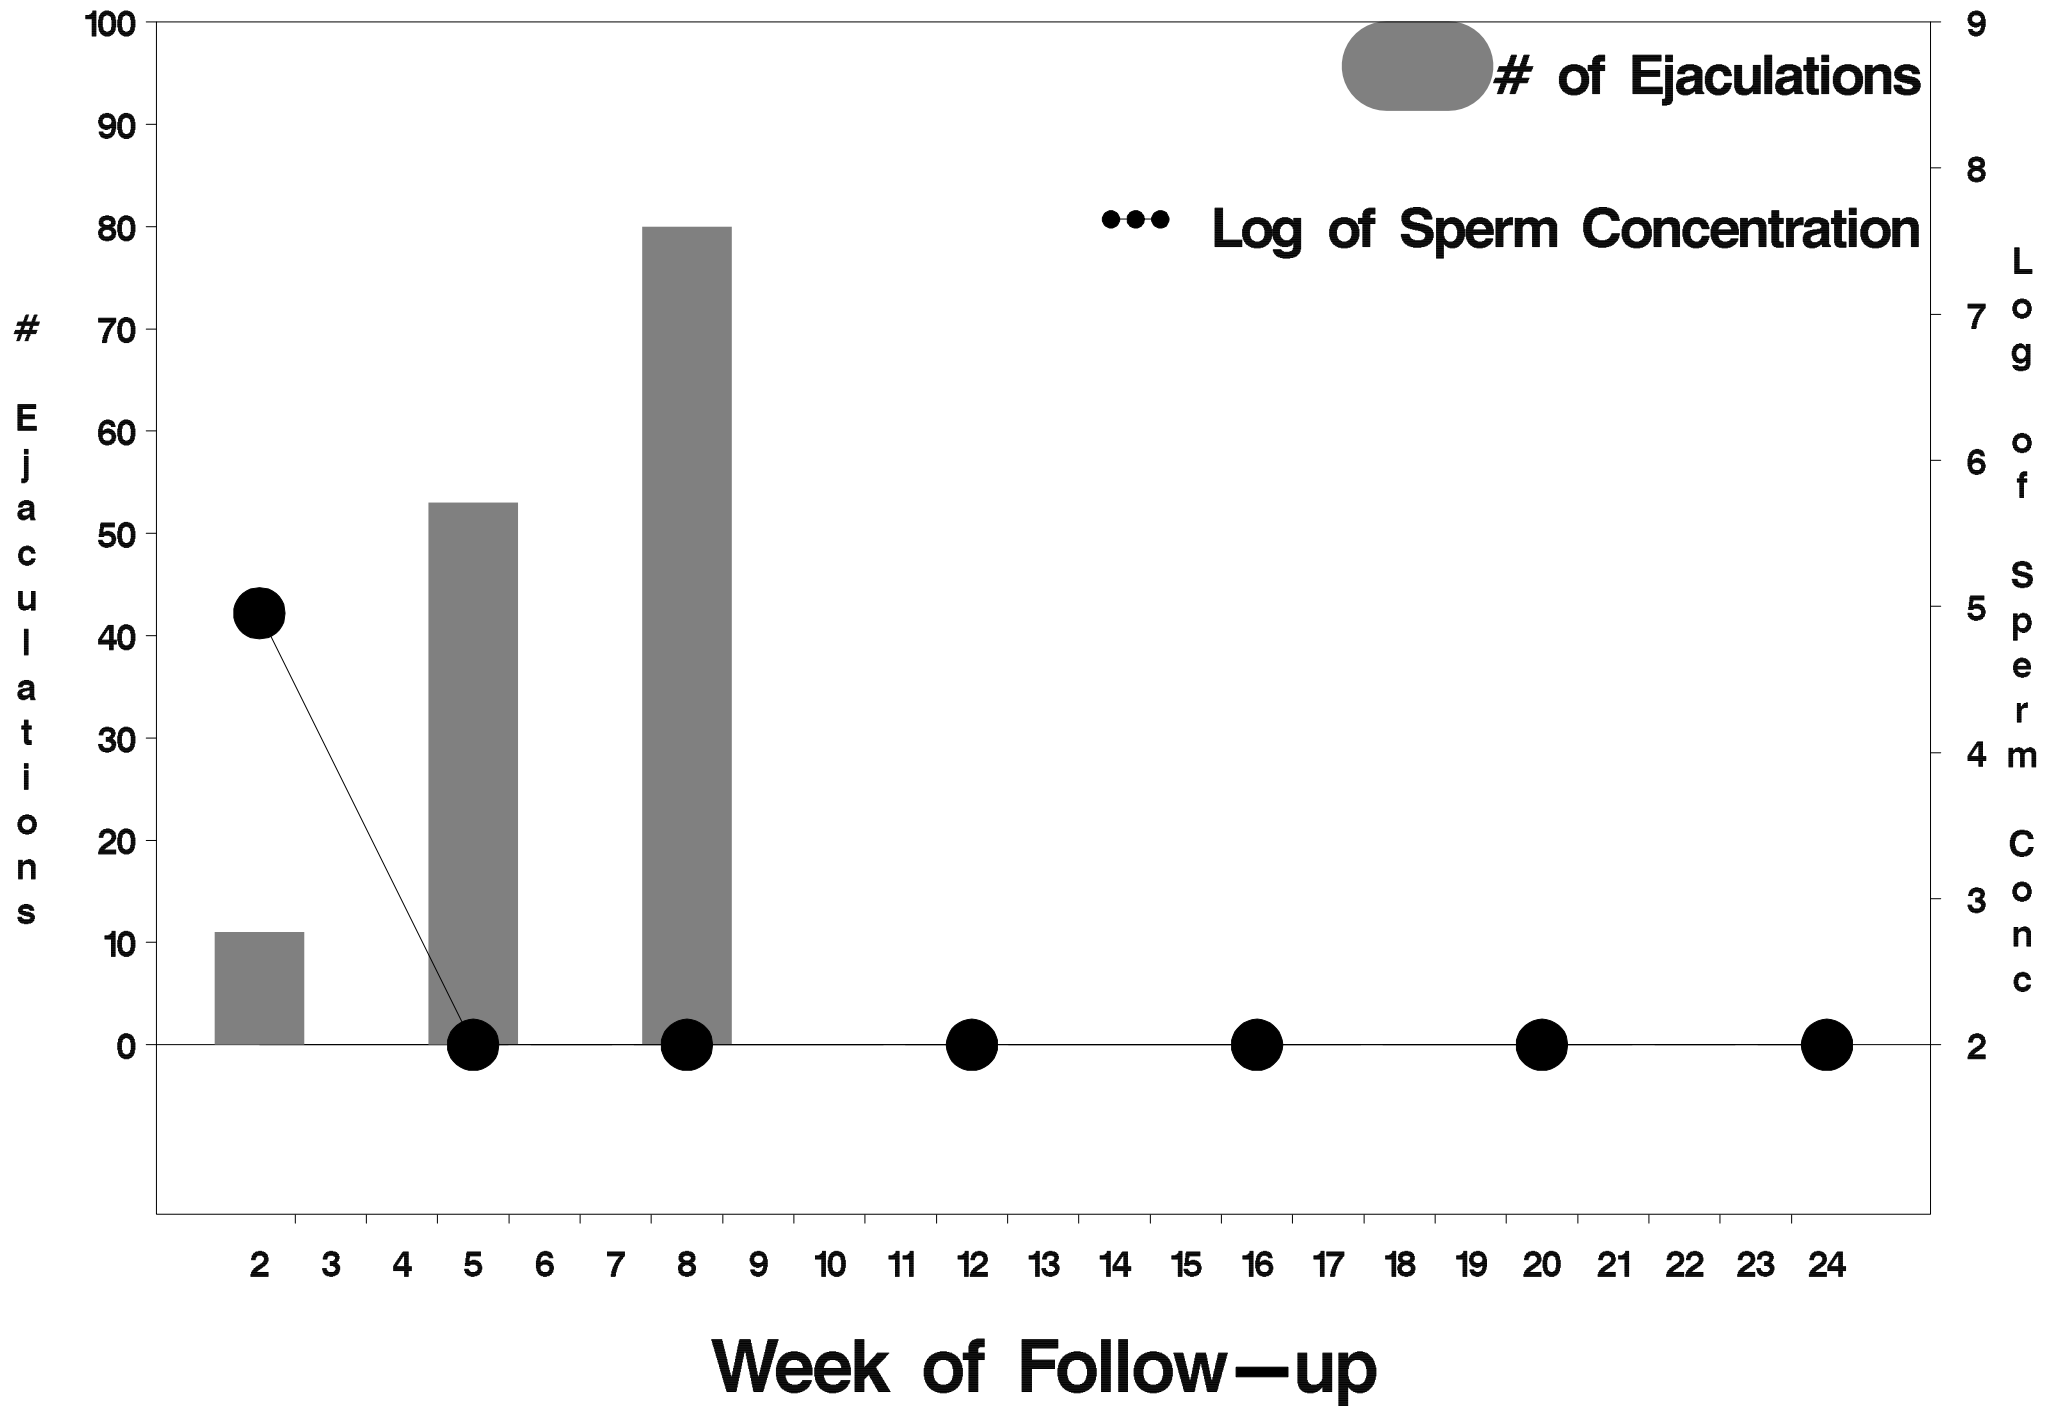

# Participant number= 388

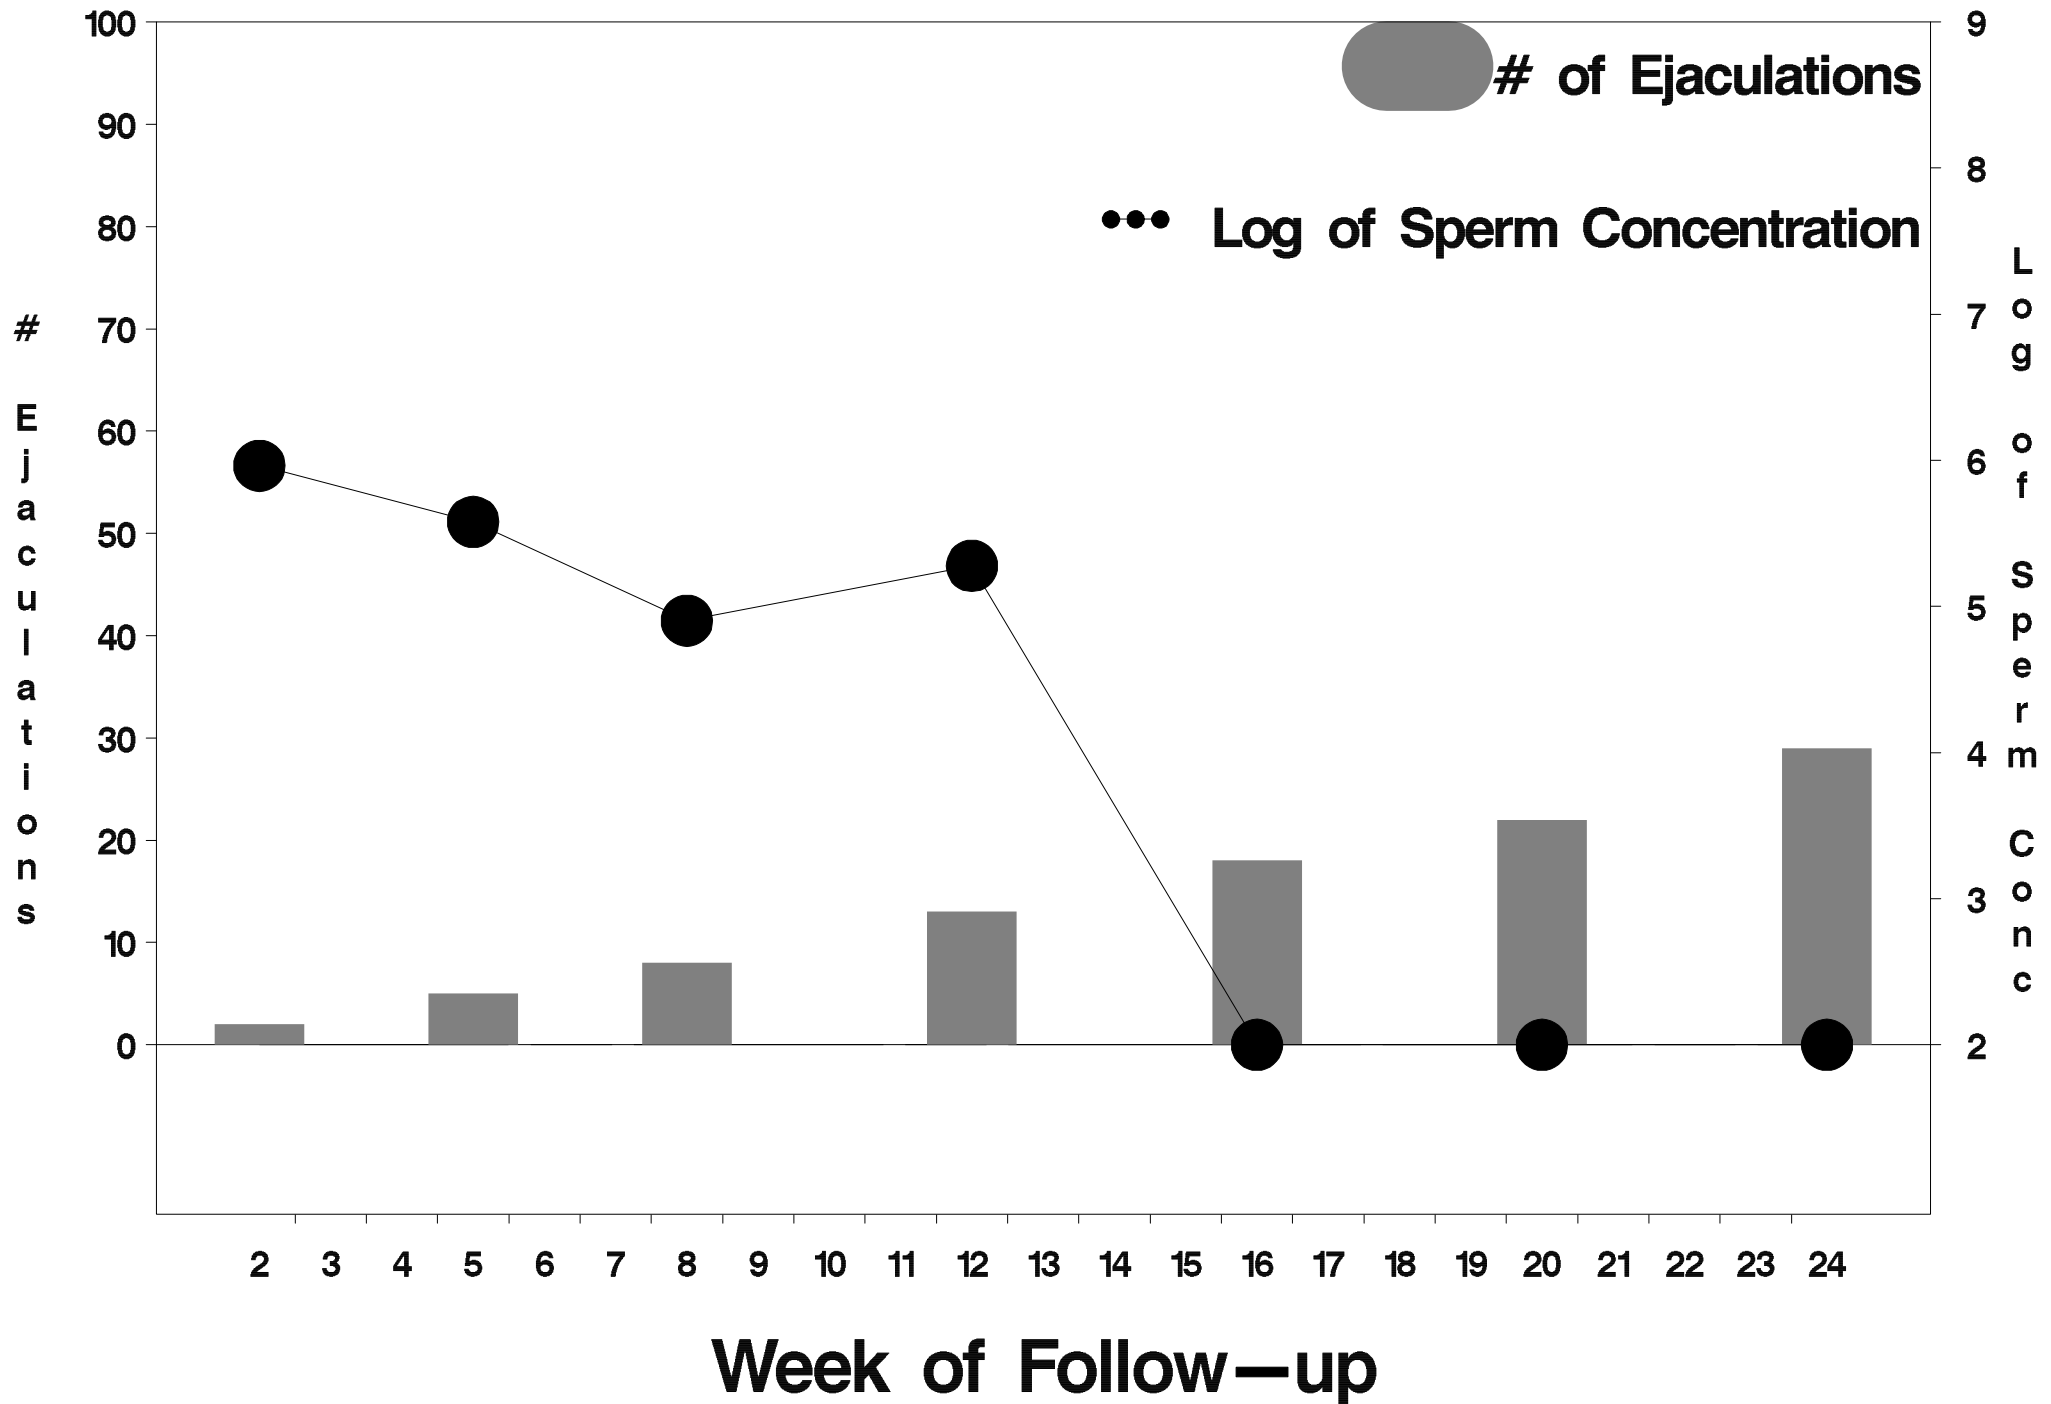

# Participant number= 389

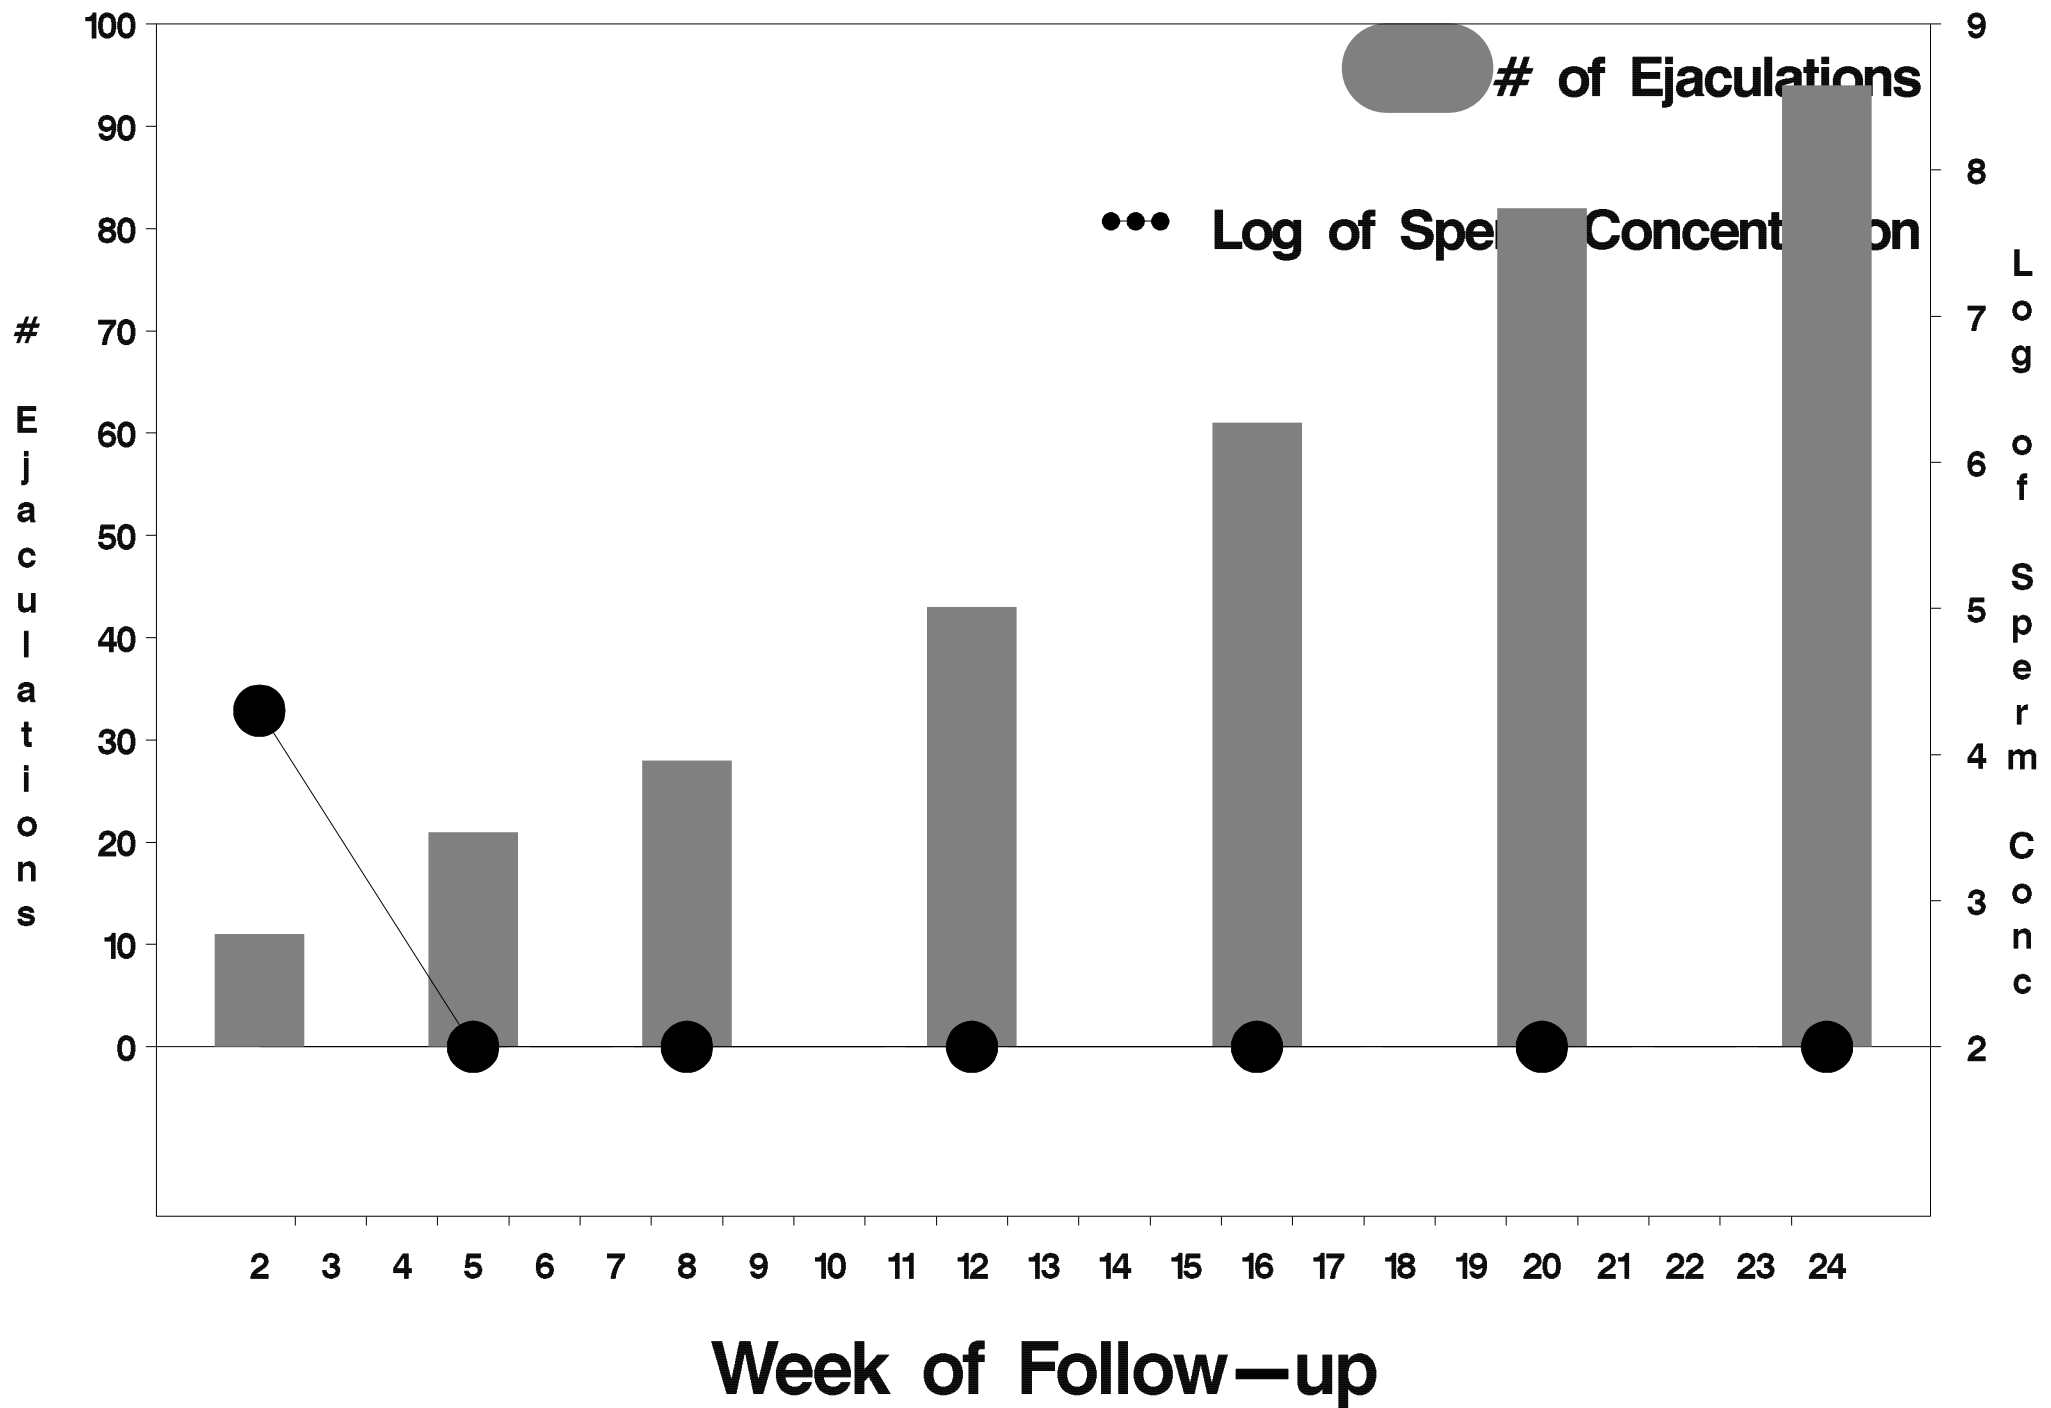

# Participant number= 390

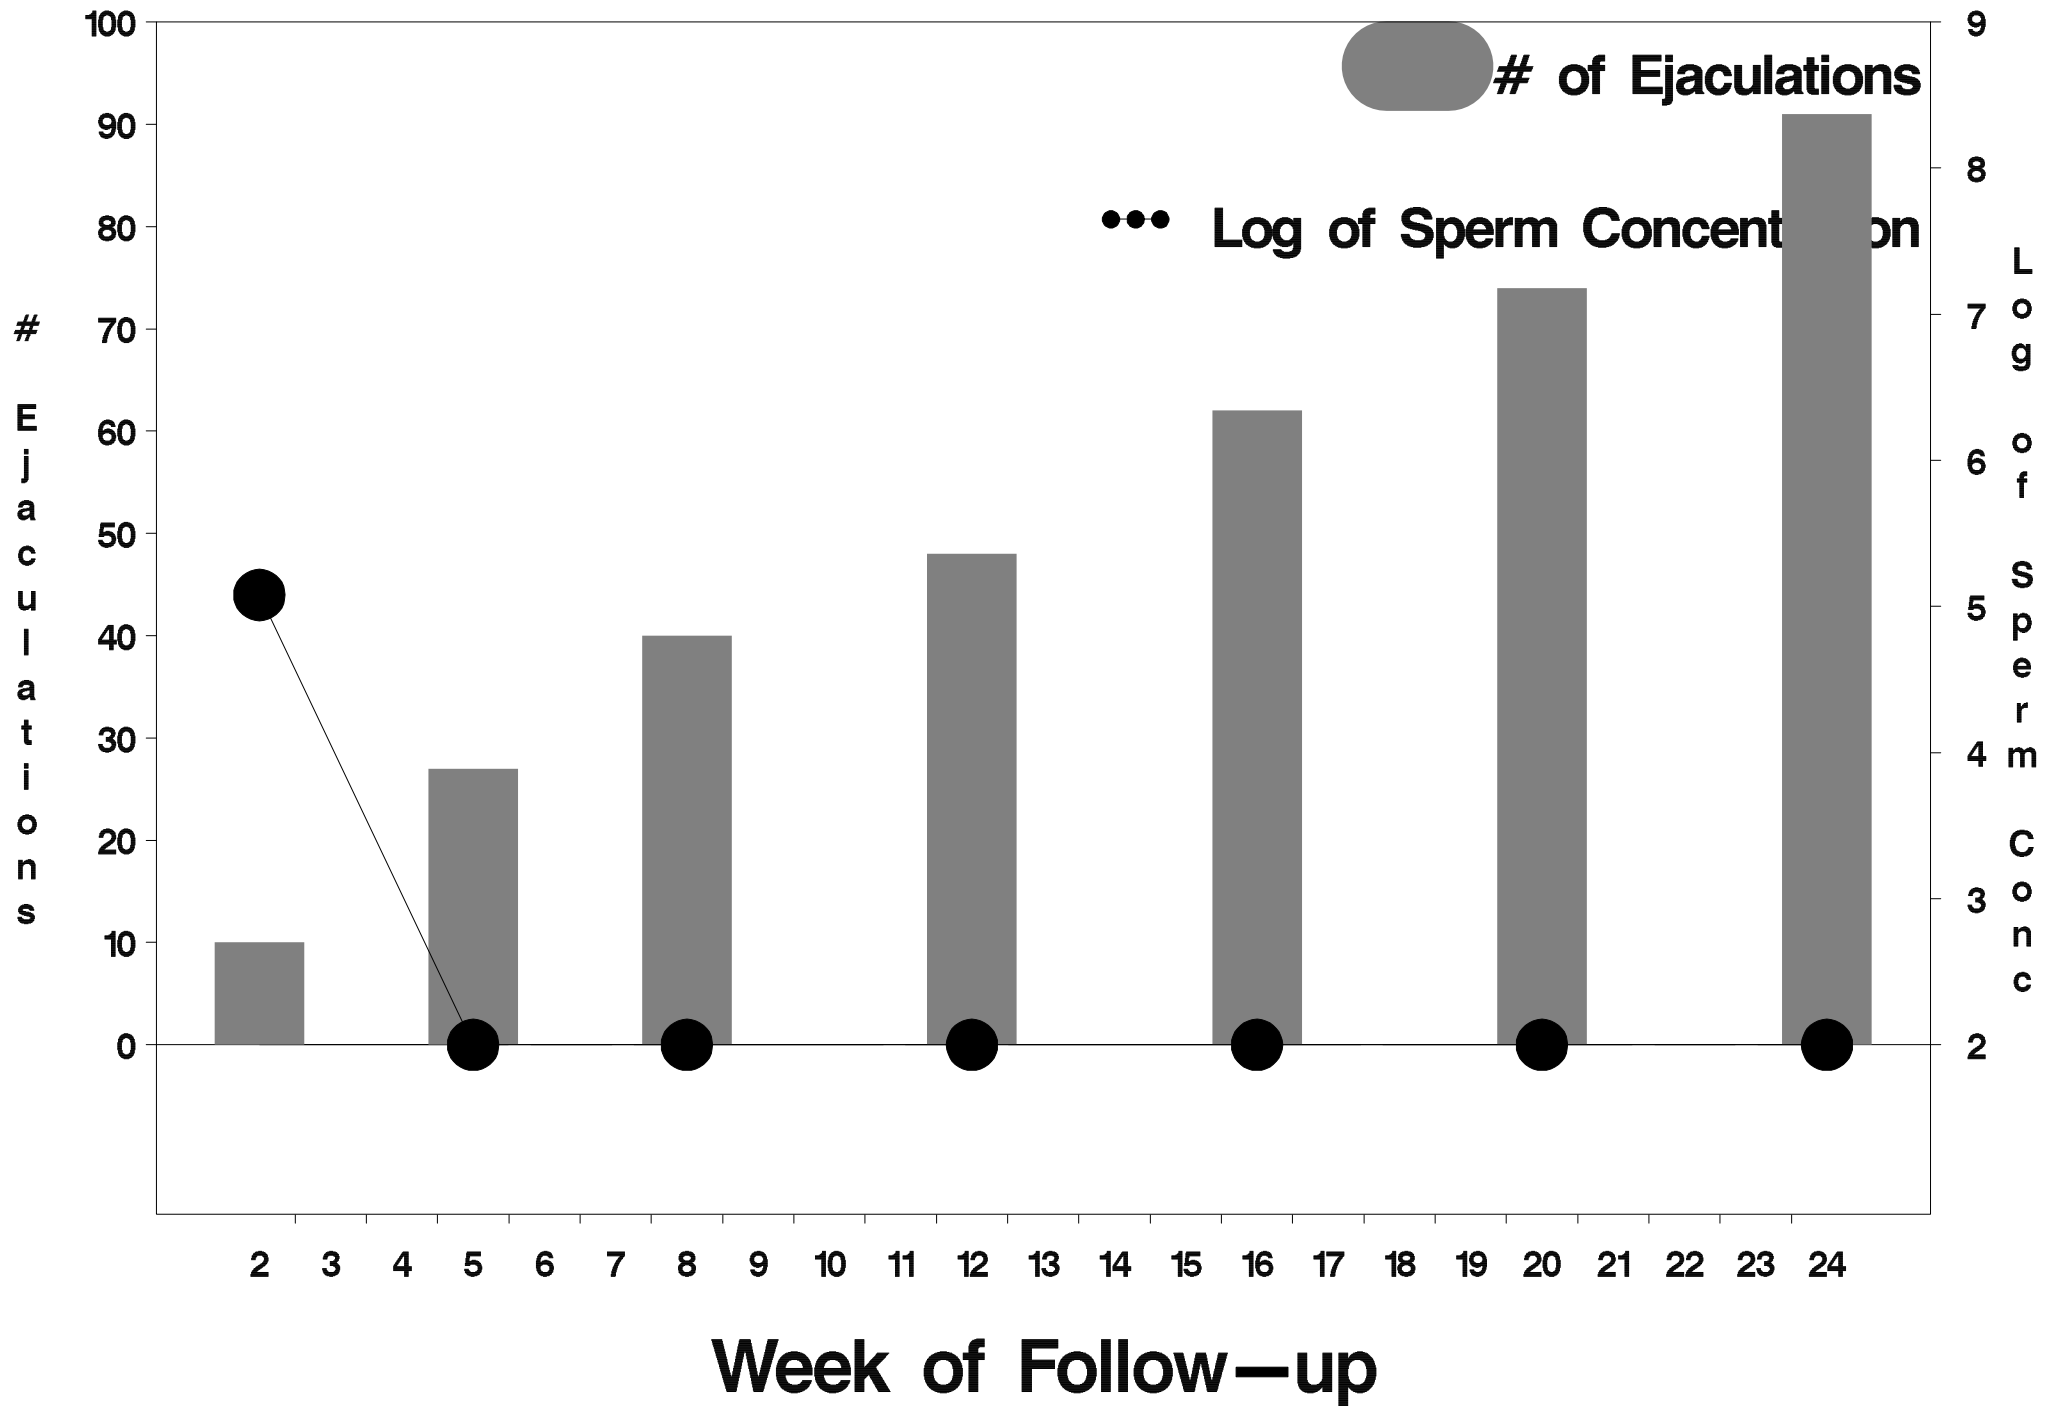

# Participant number= 391

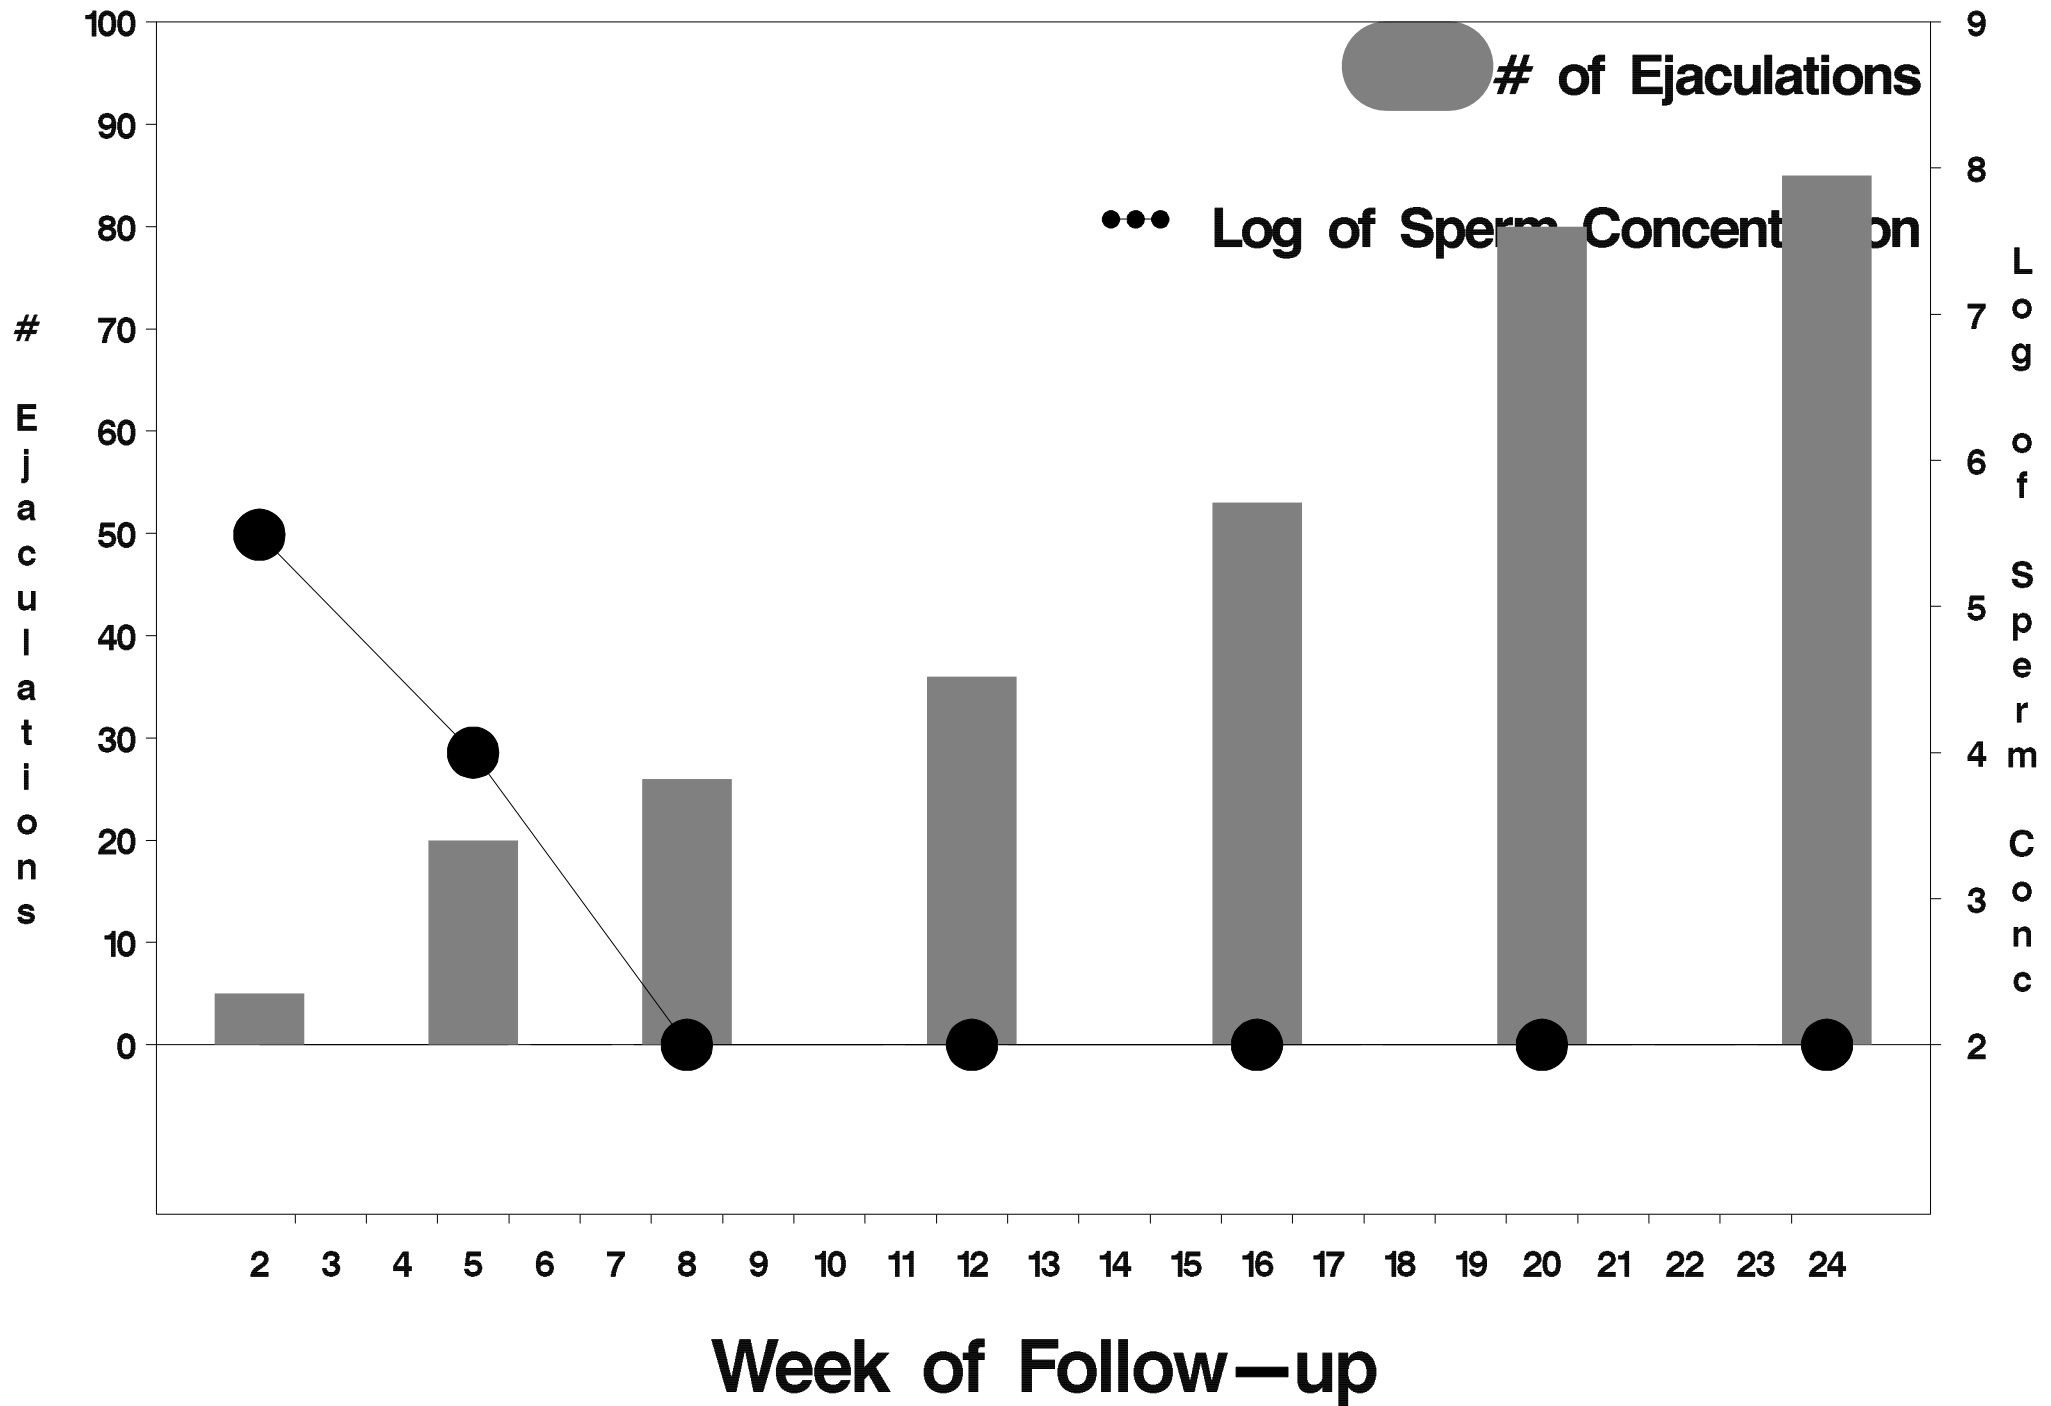

# Participant number= 392

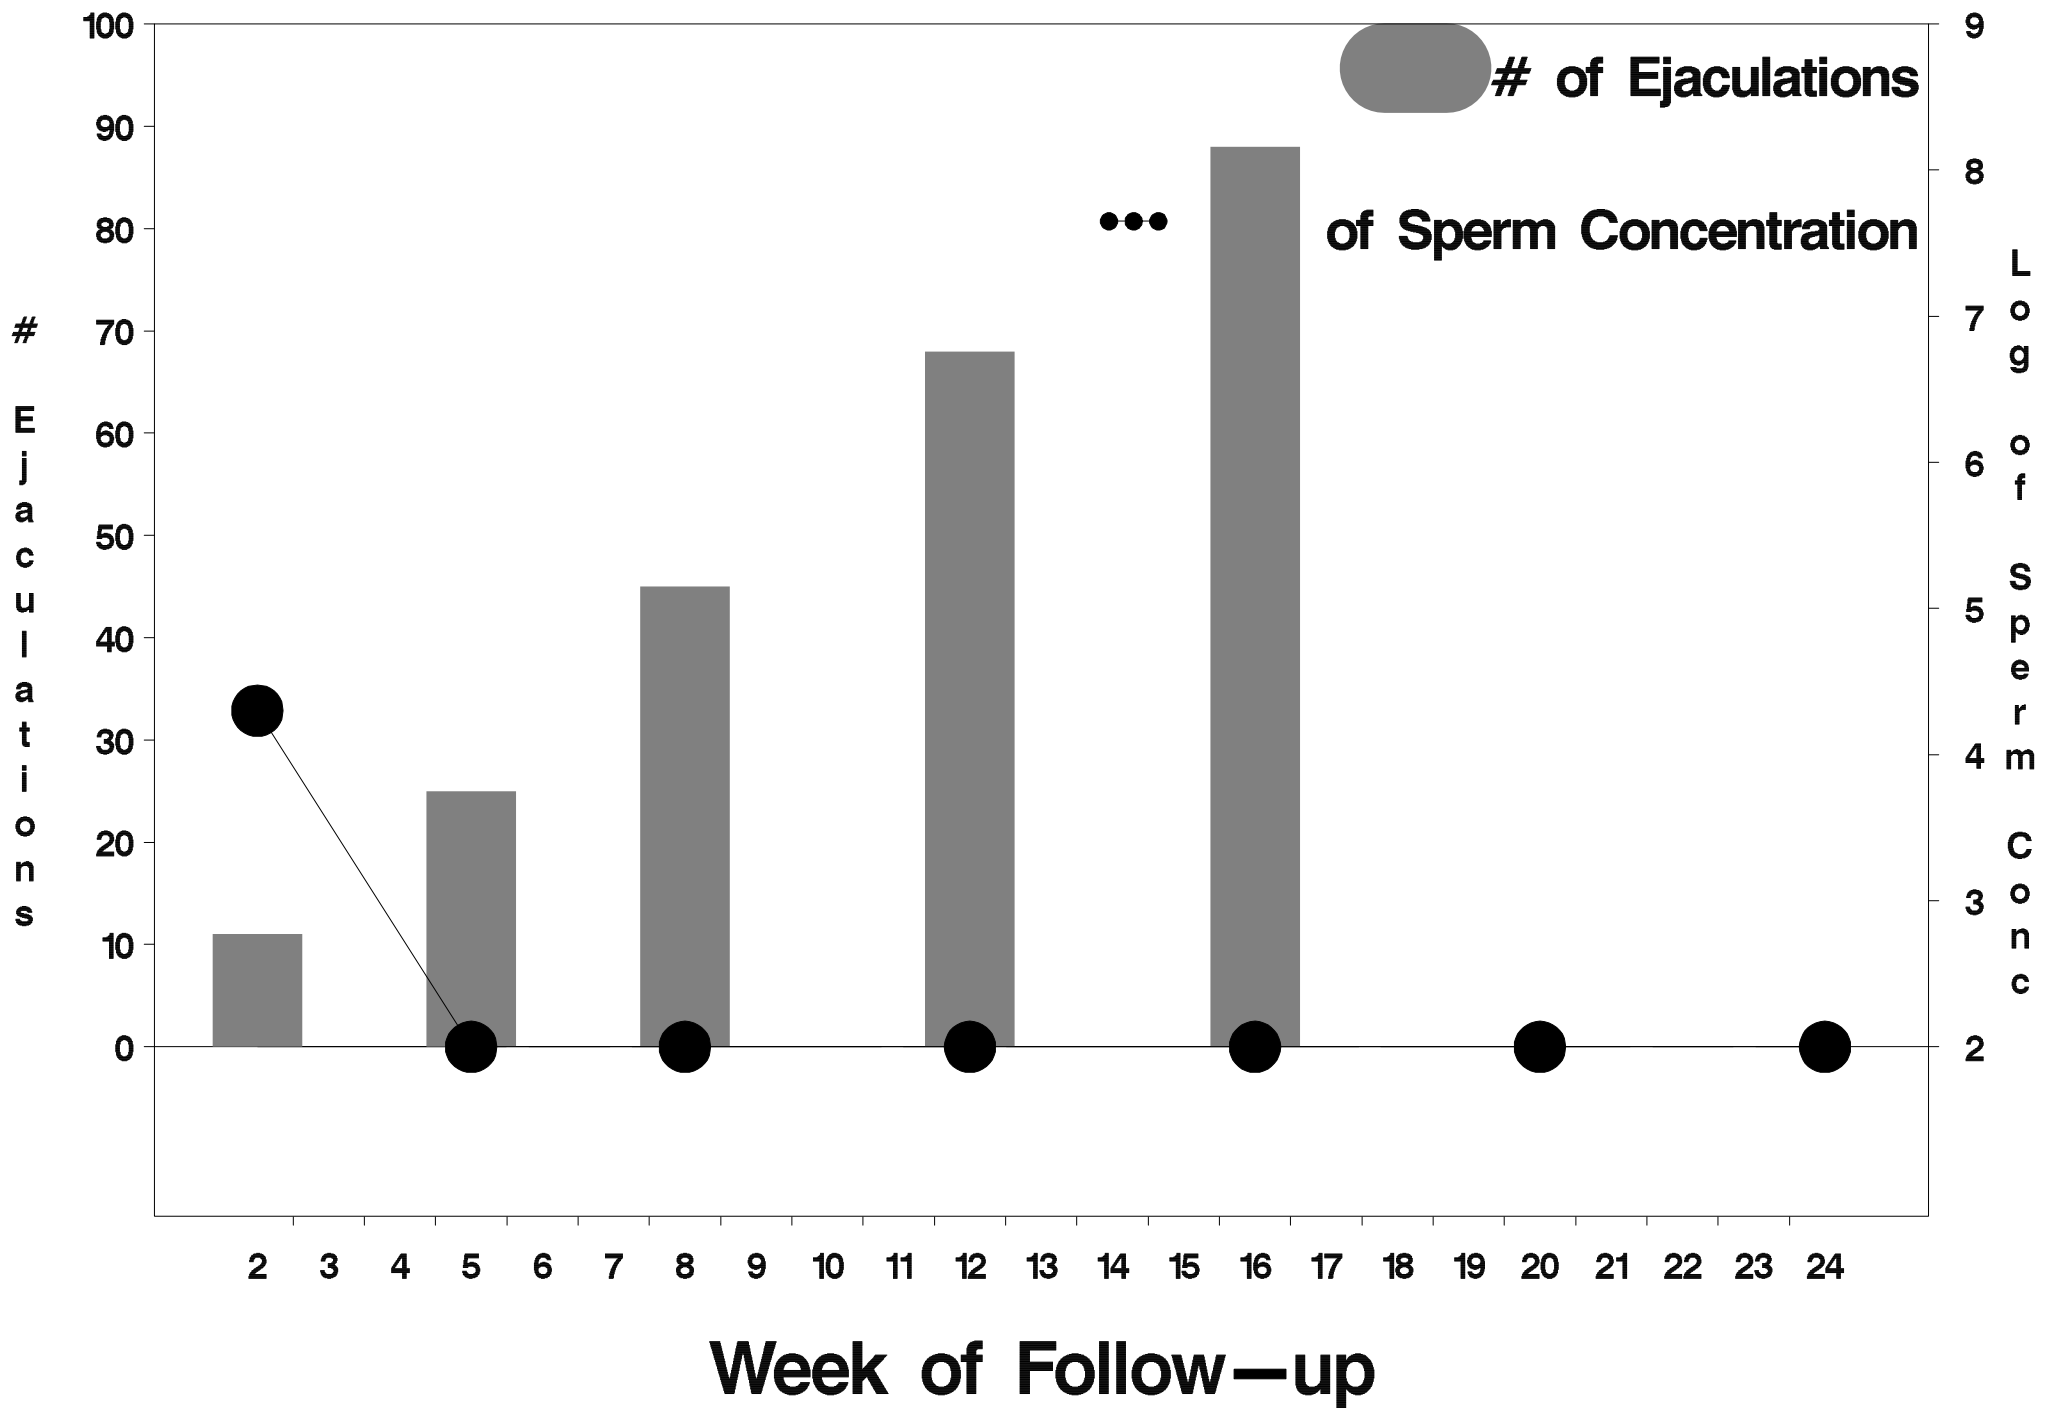

# Participant number= 393

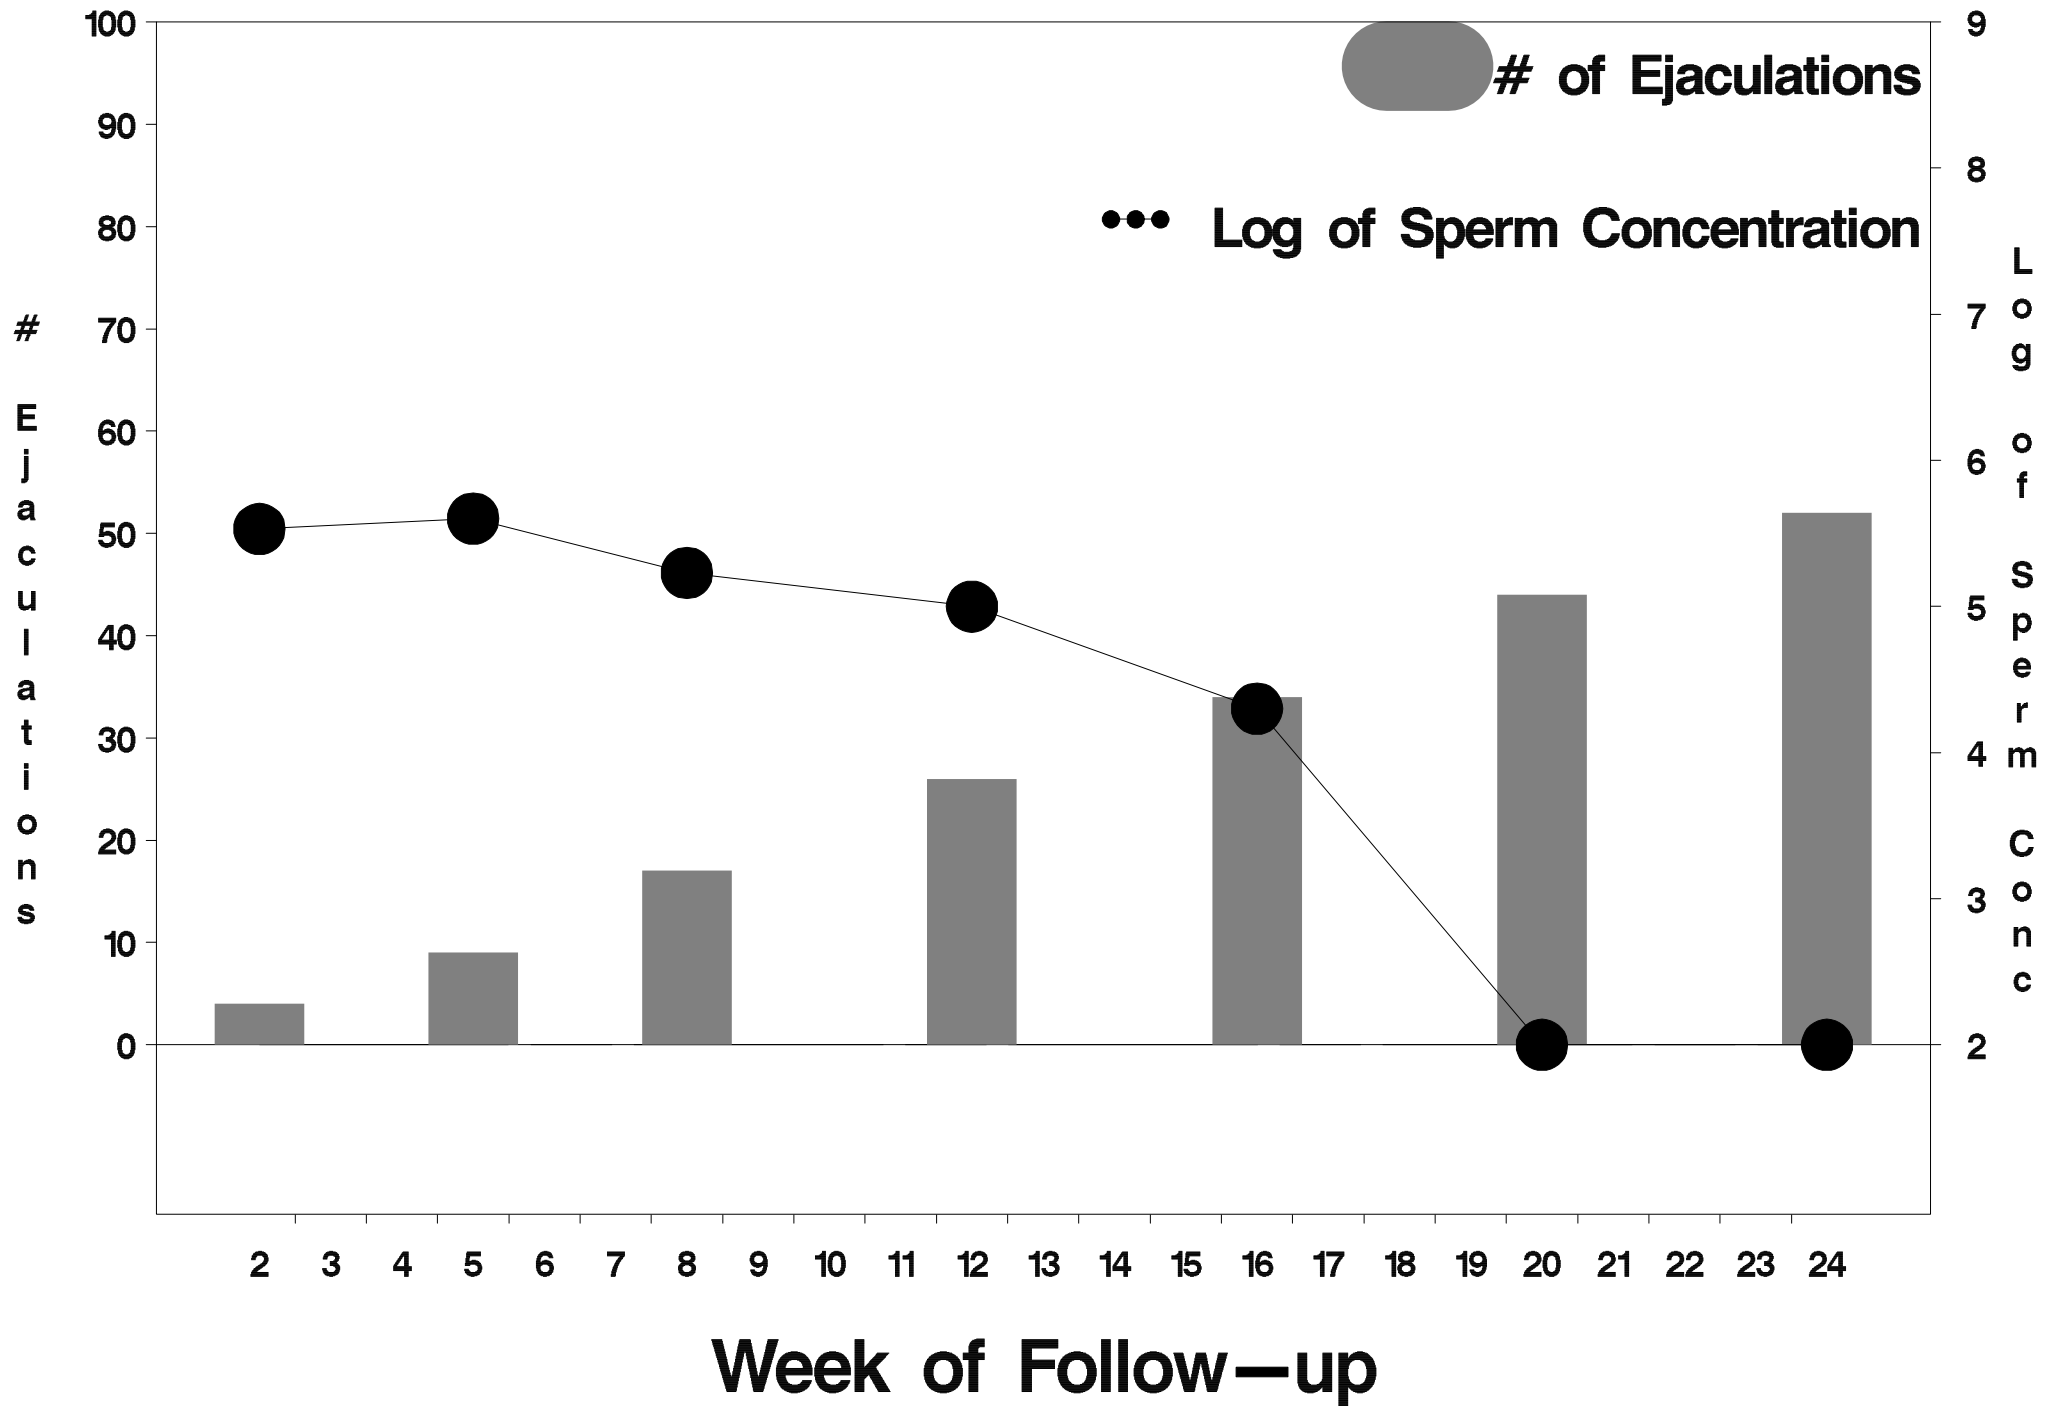



# Participant number= 394

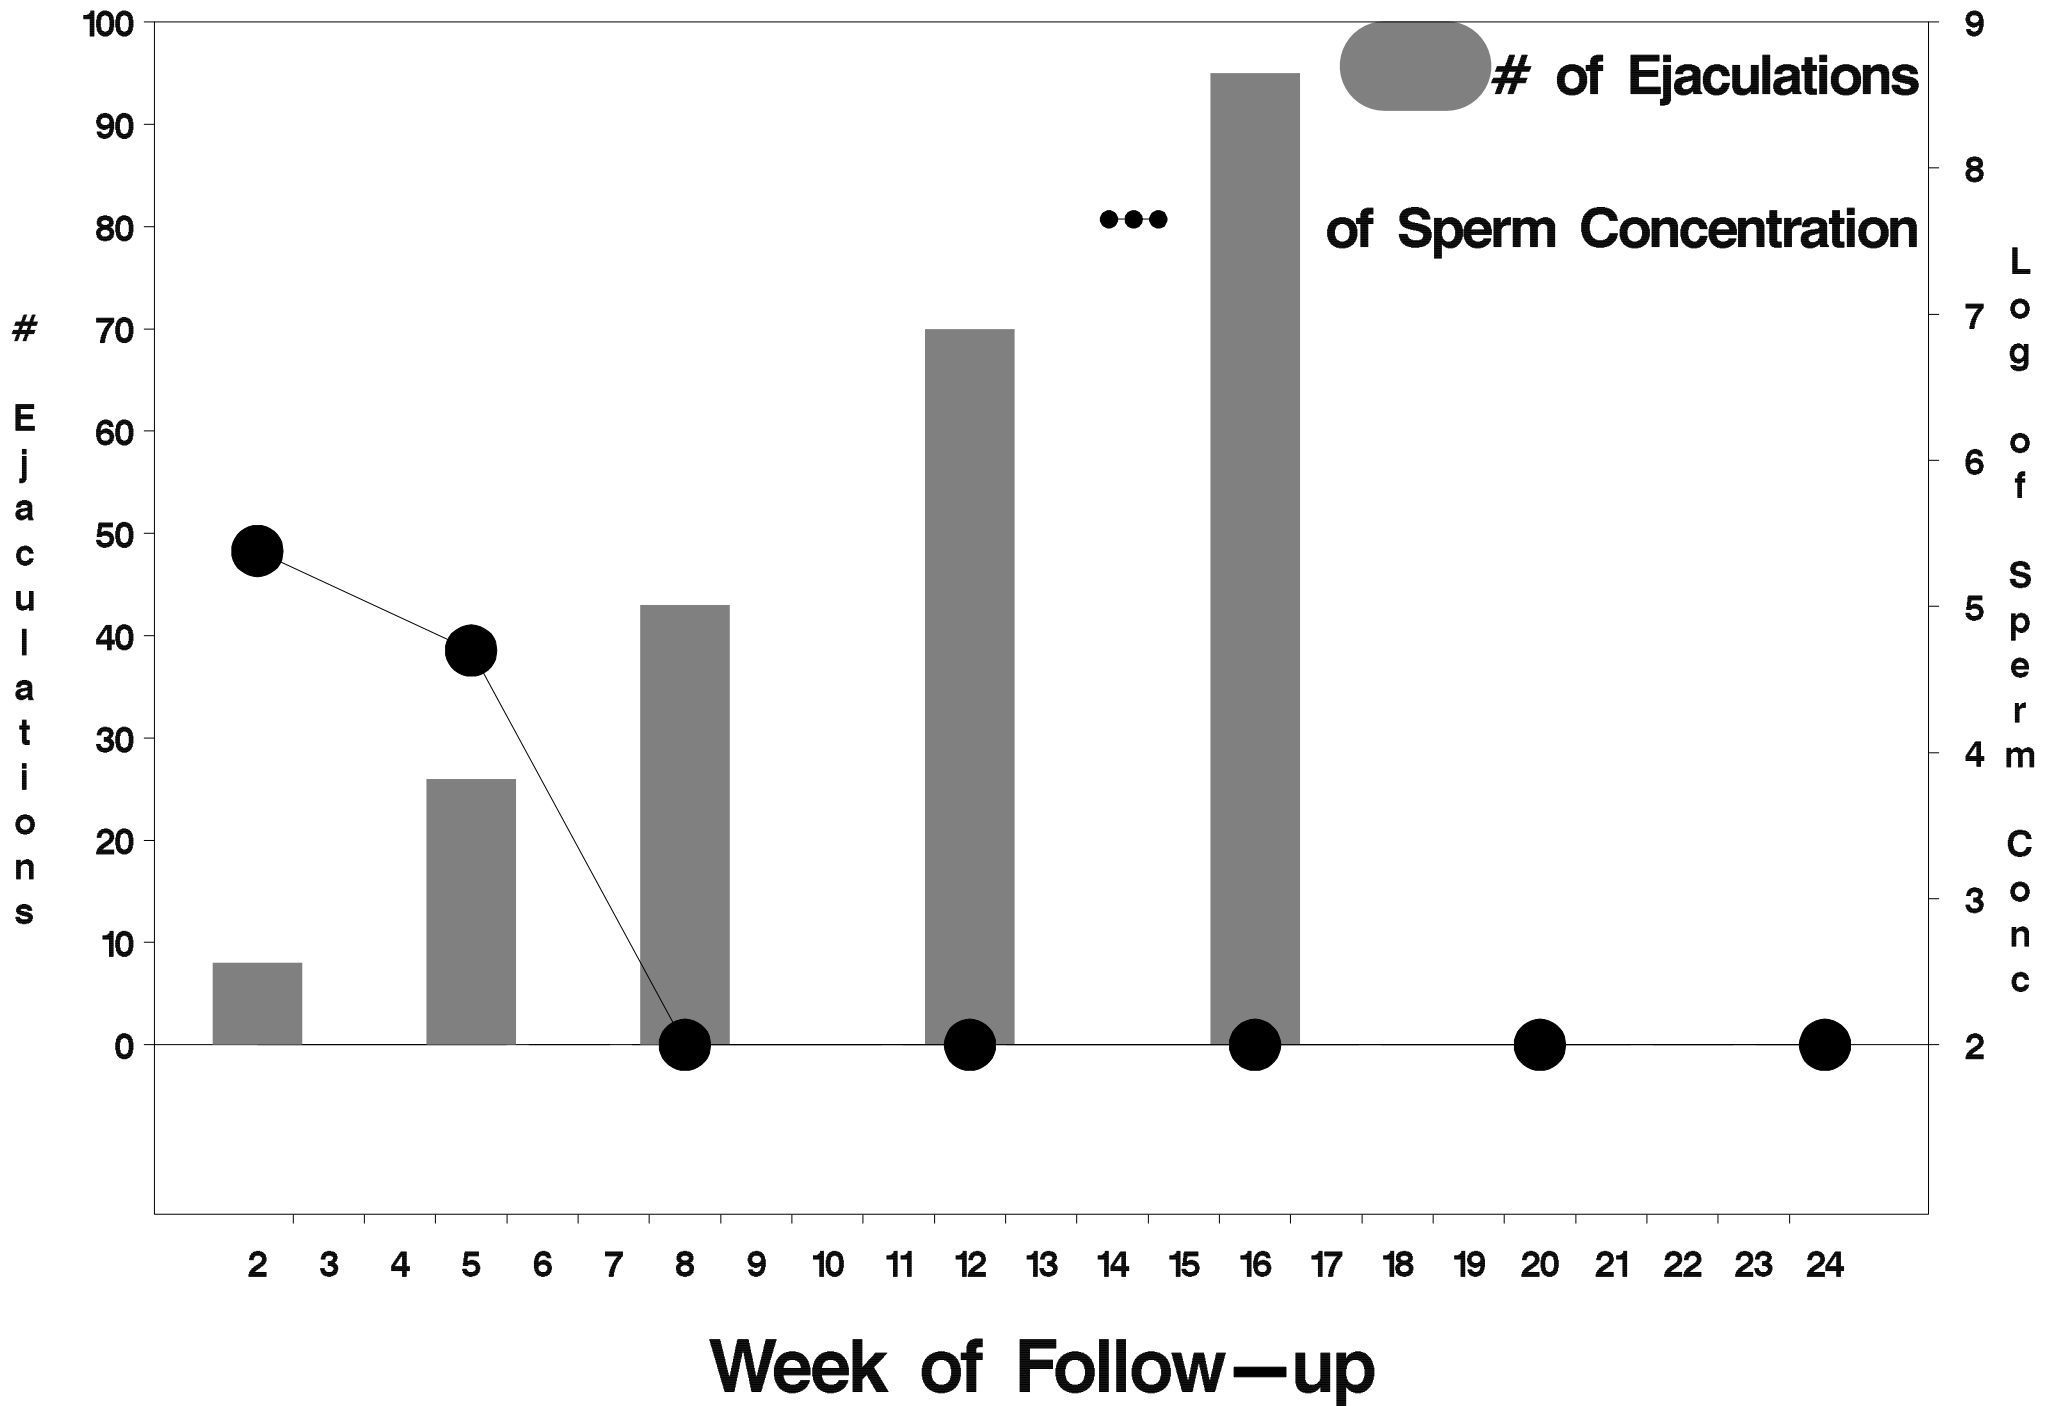

# Participant number= 395

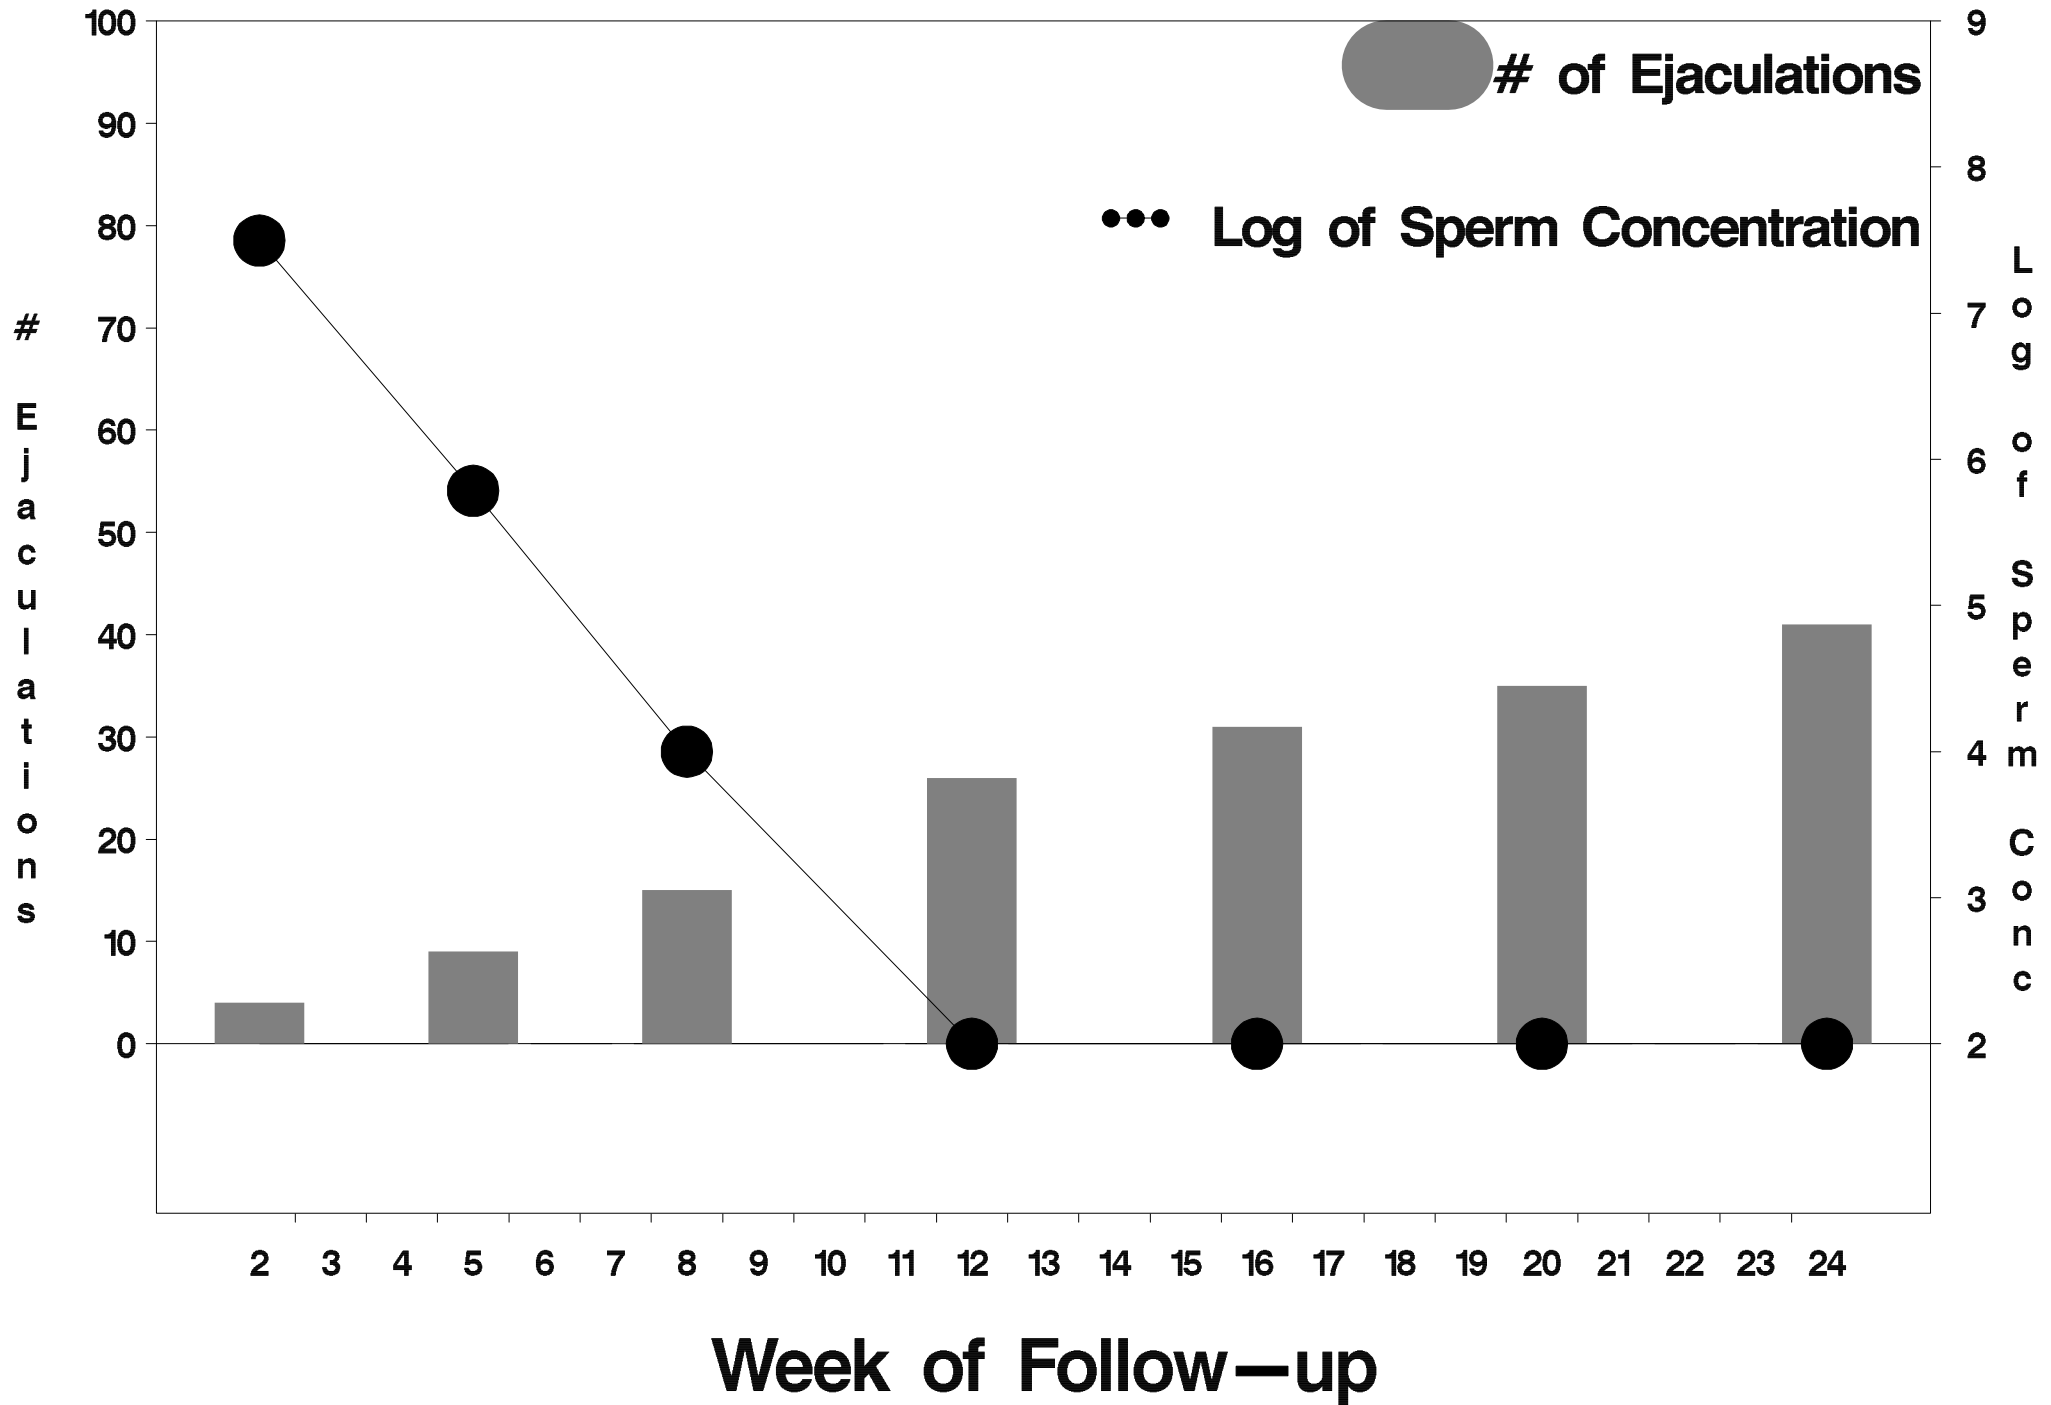

# Participant number= 396

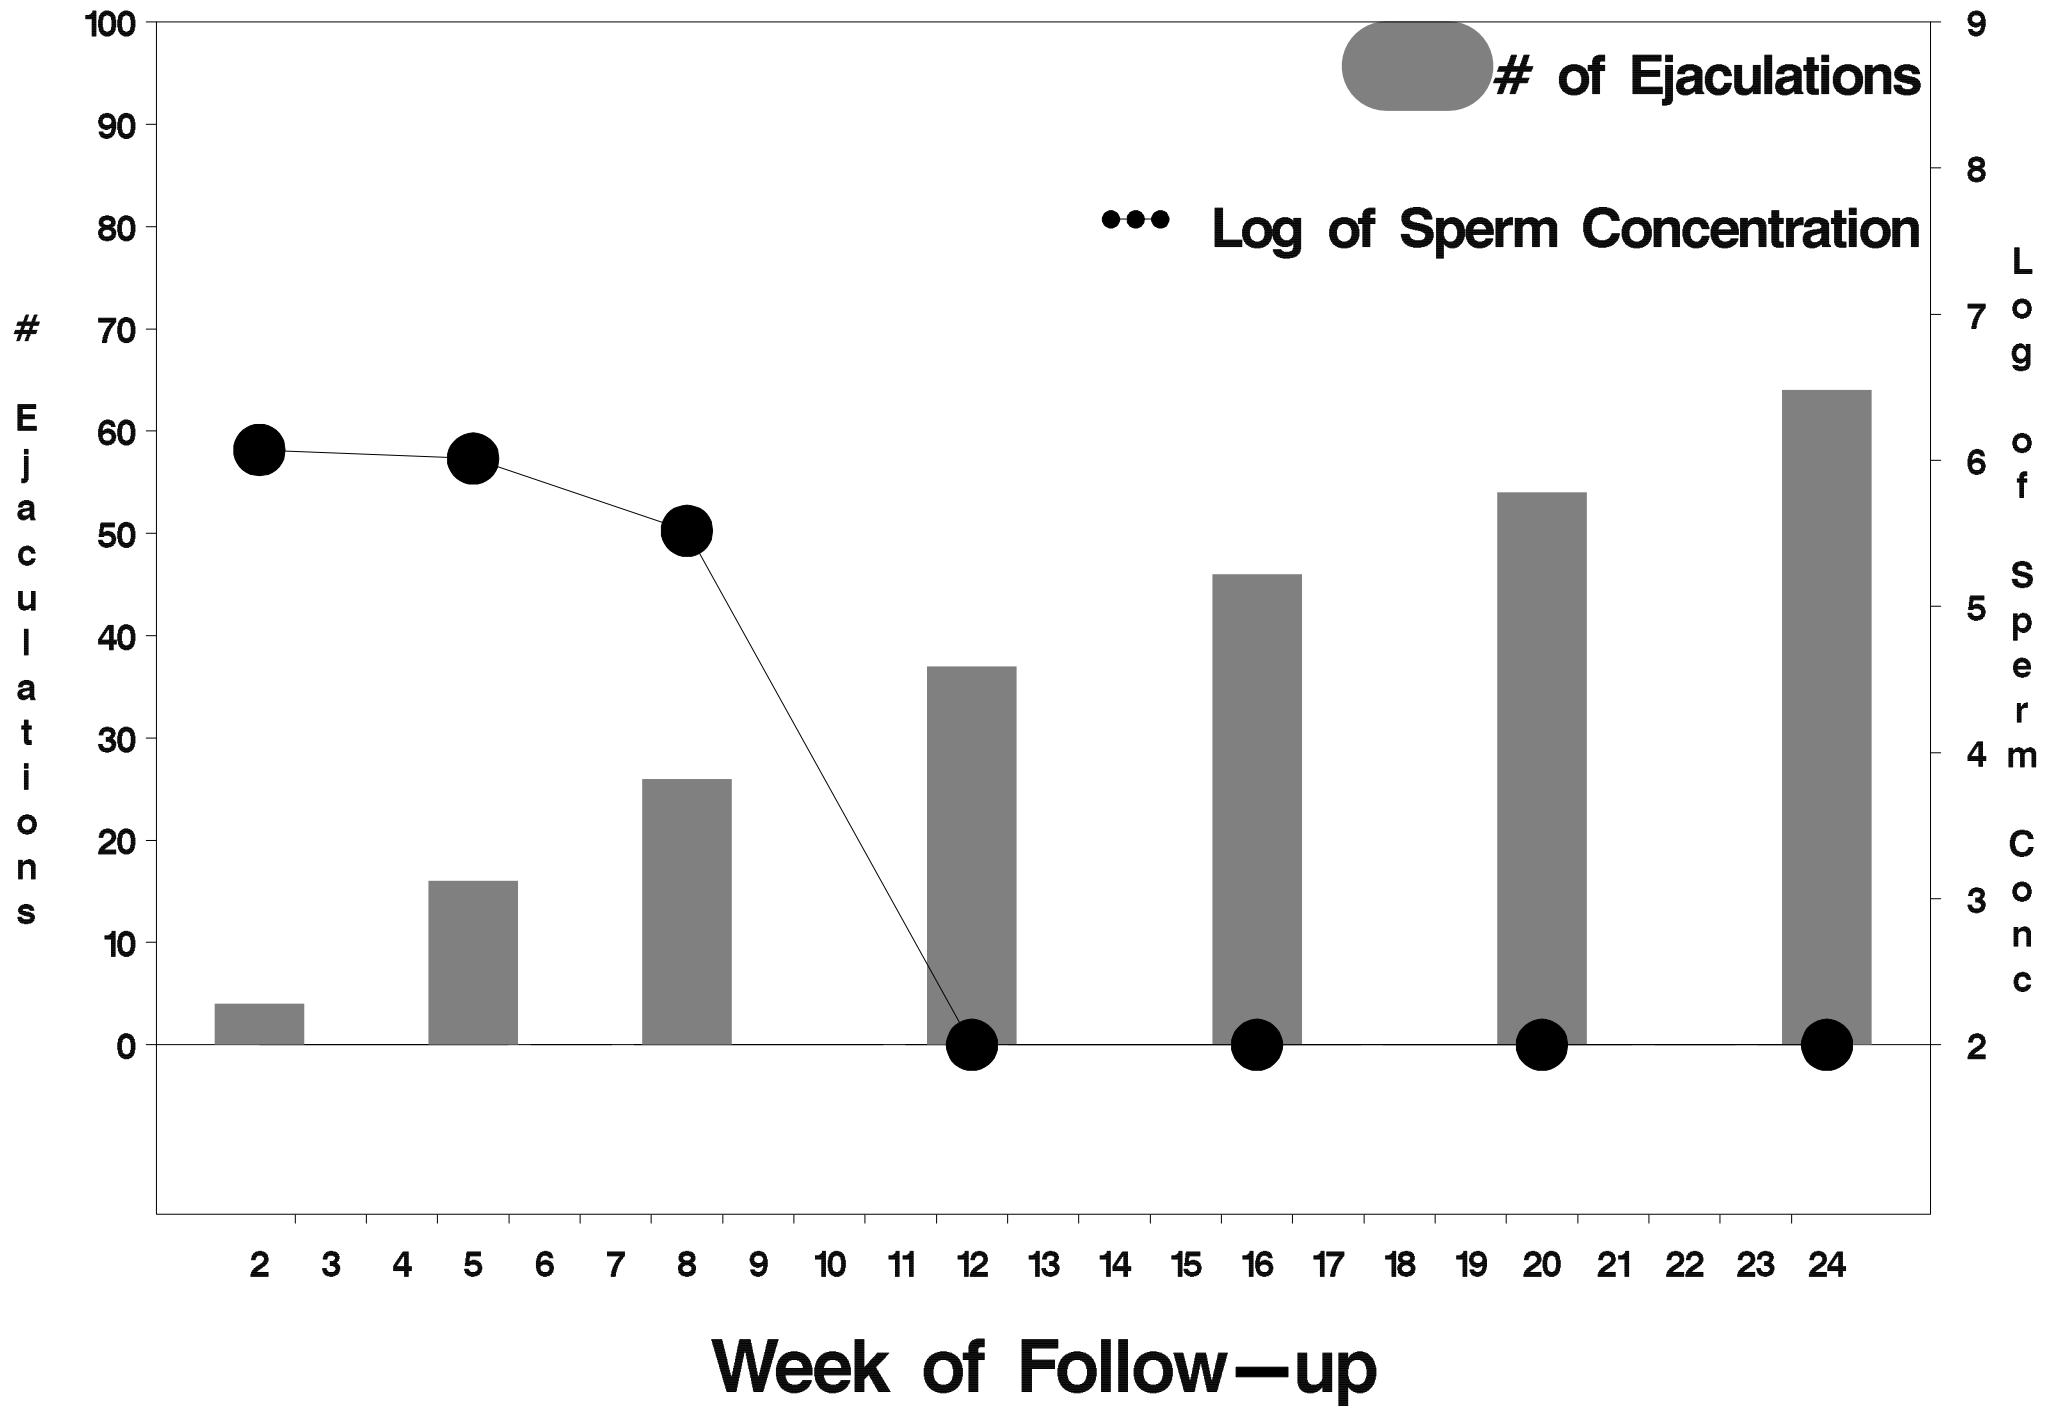

# Participant number= 397

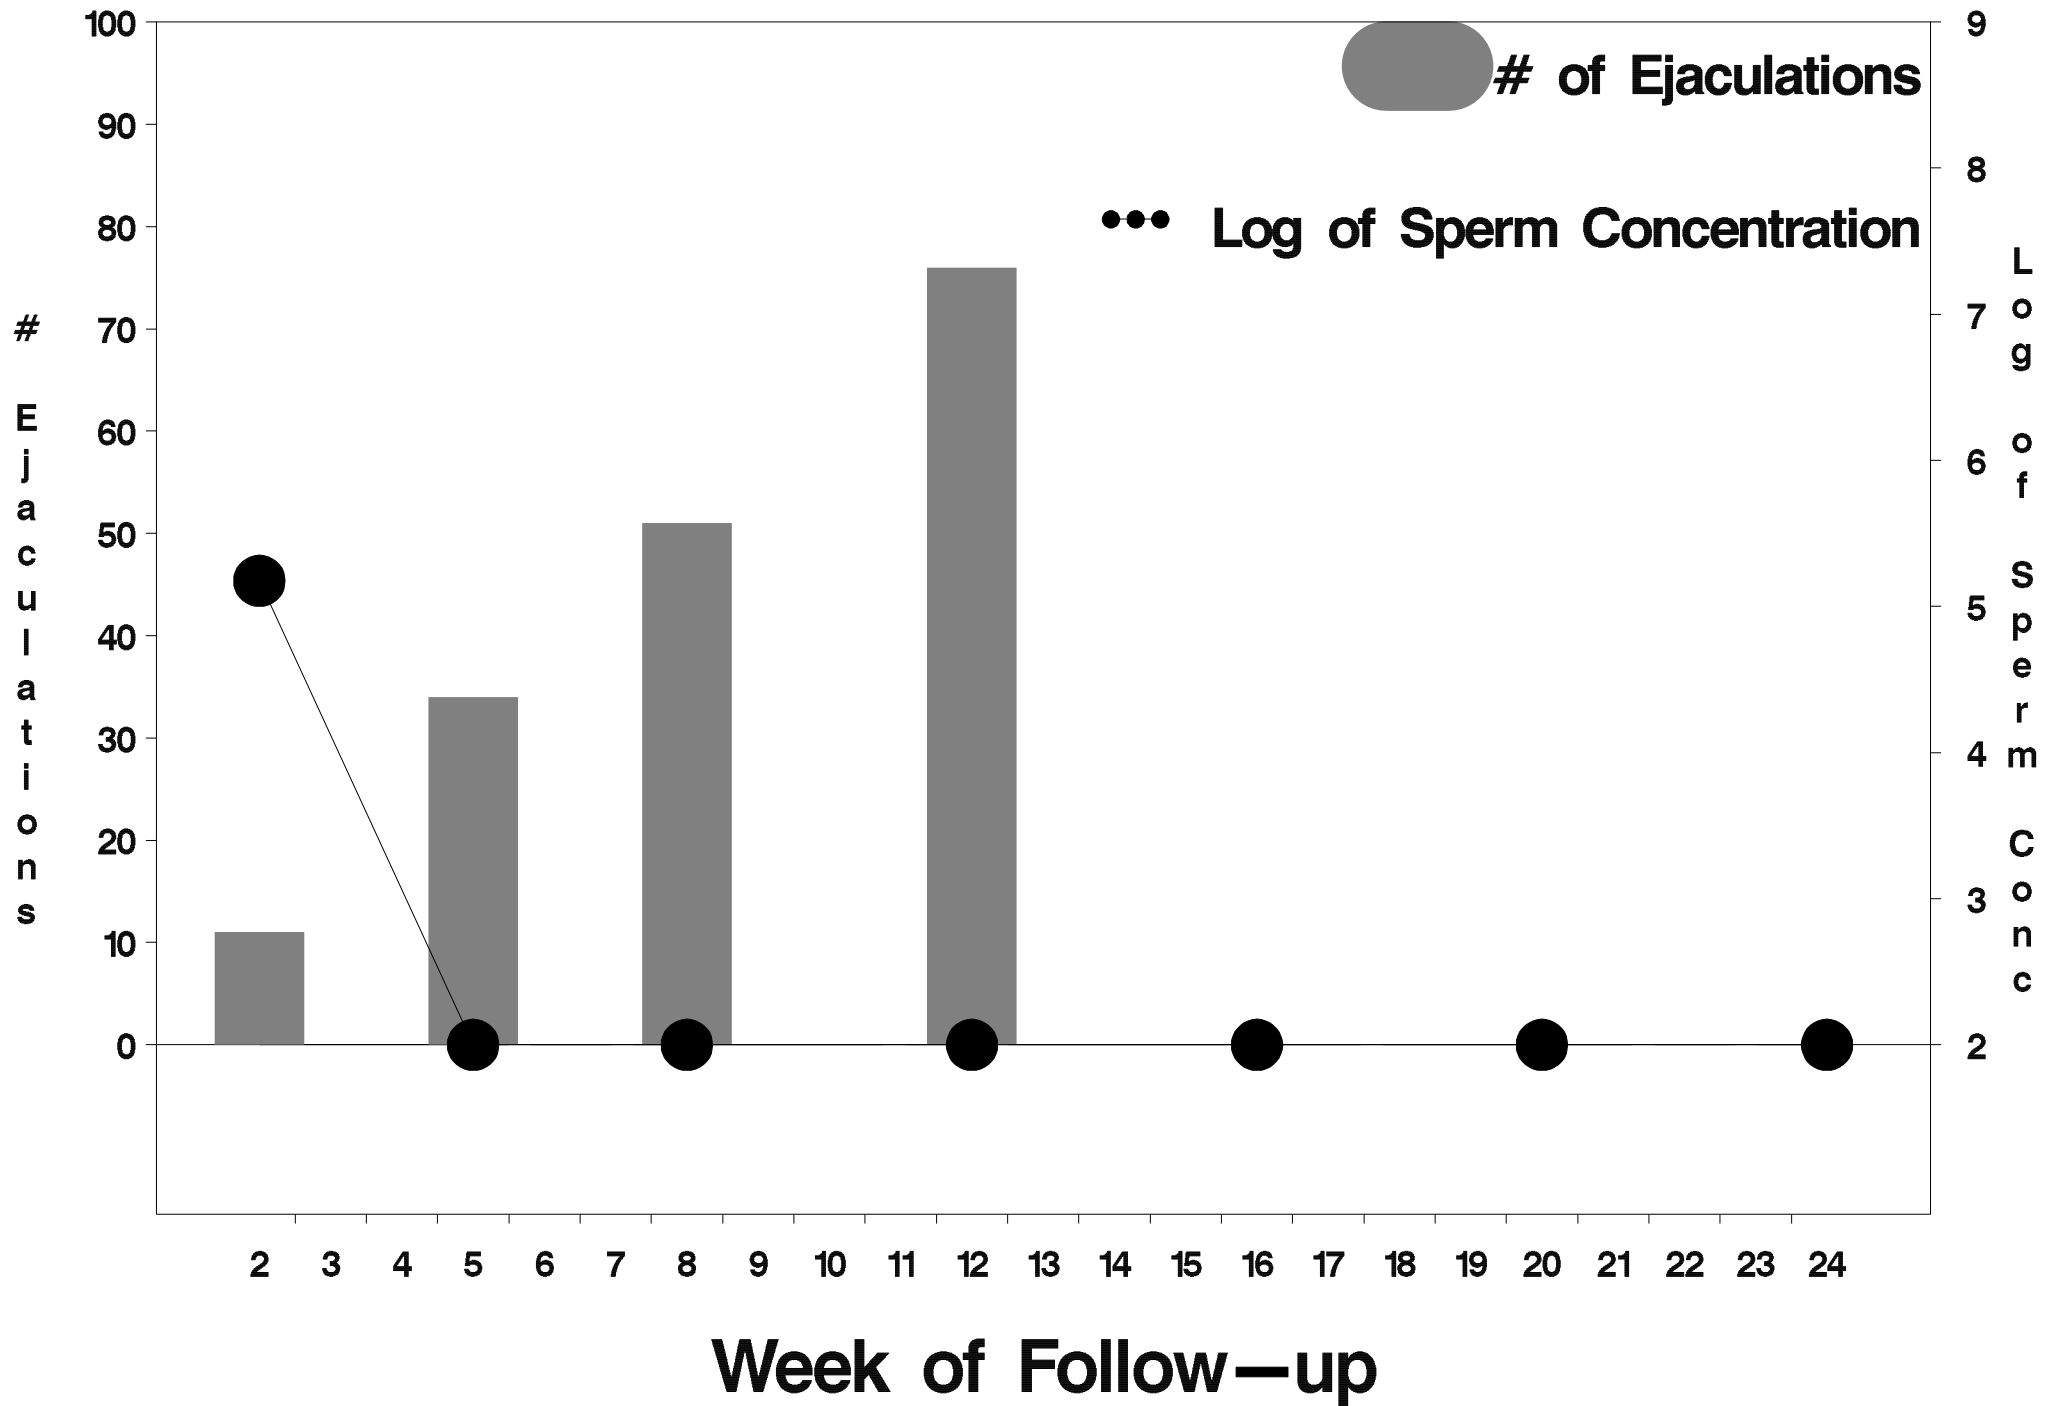

# Participant number= 398

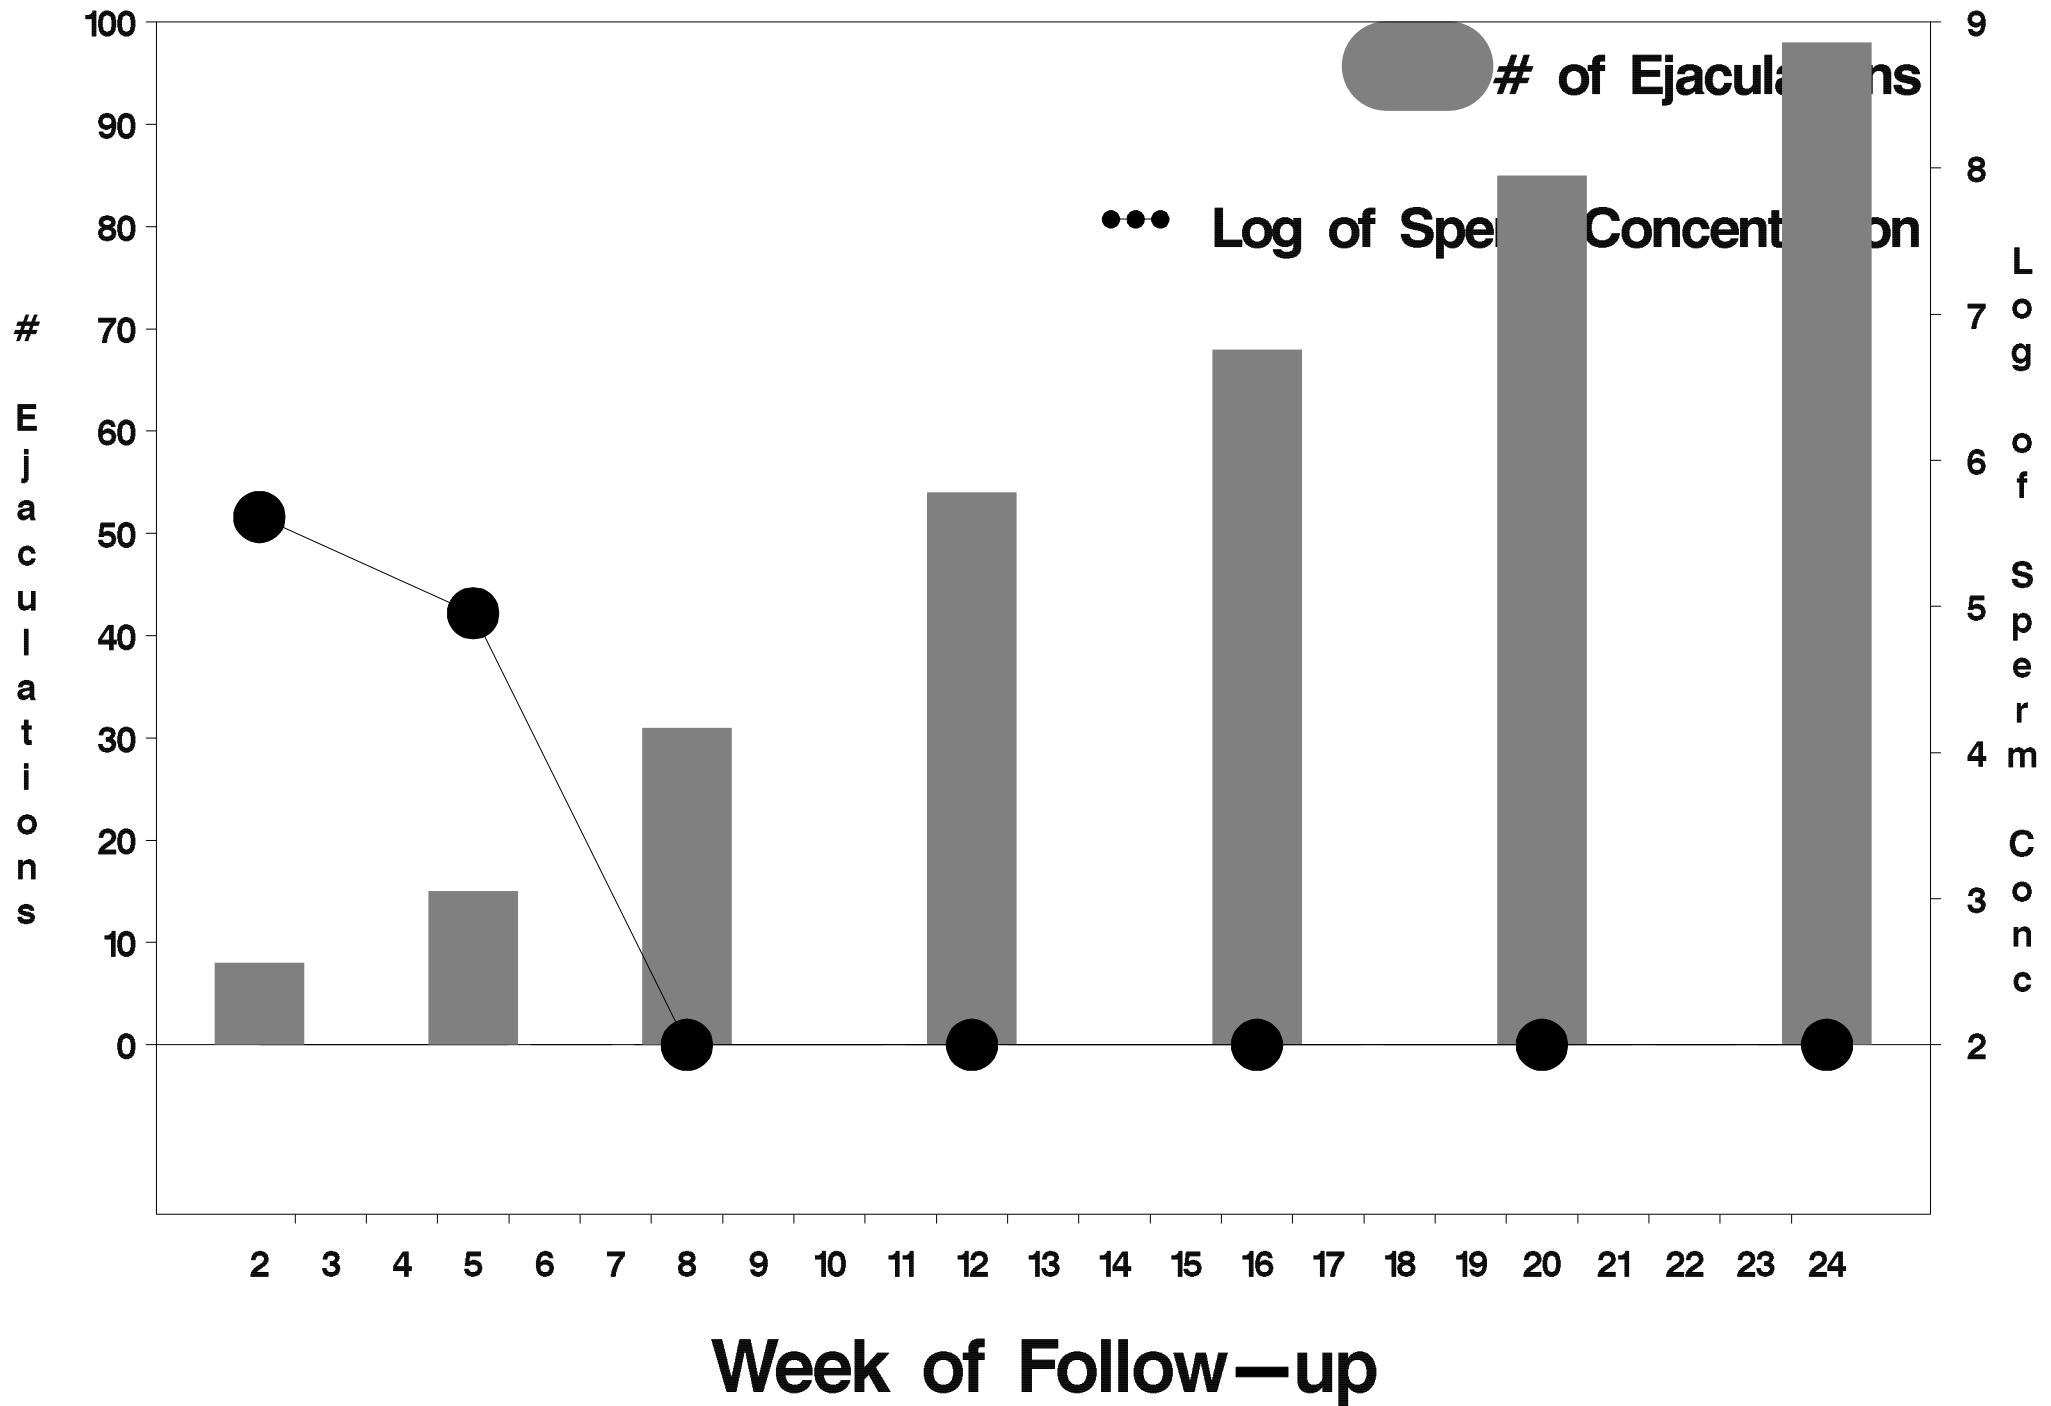

# Participant number= 399

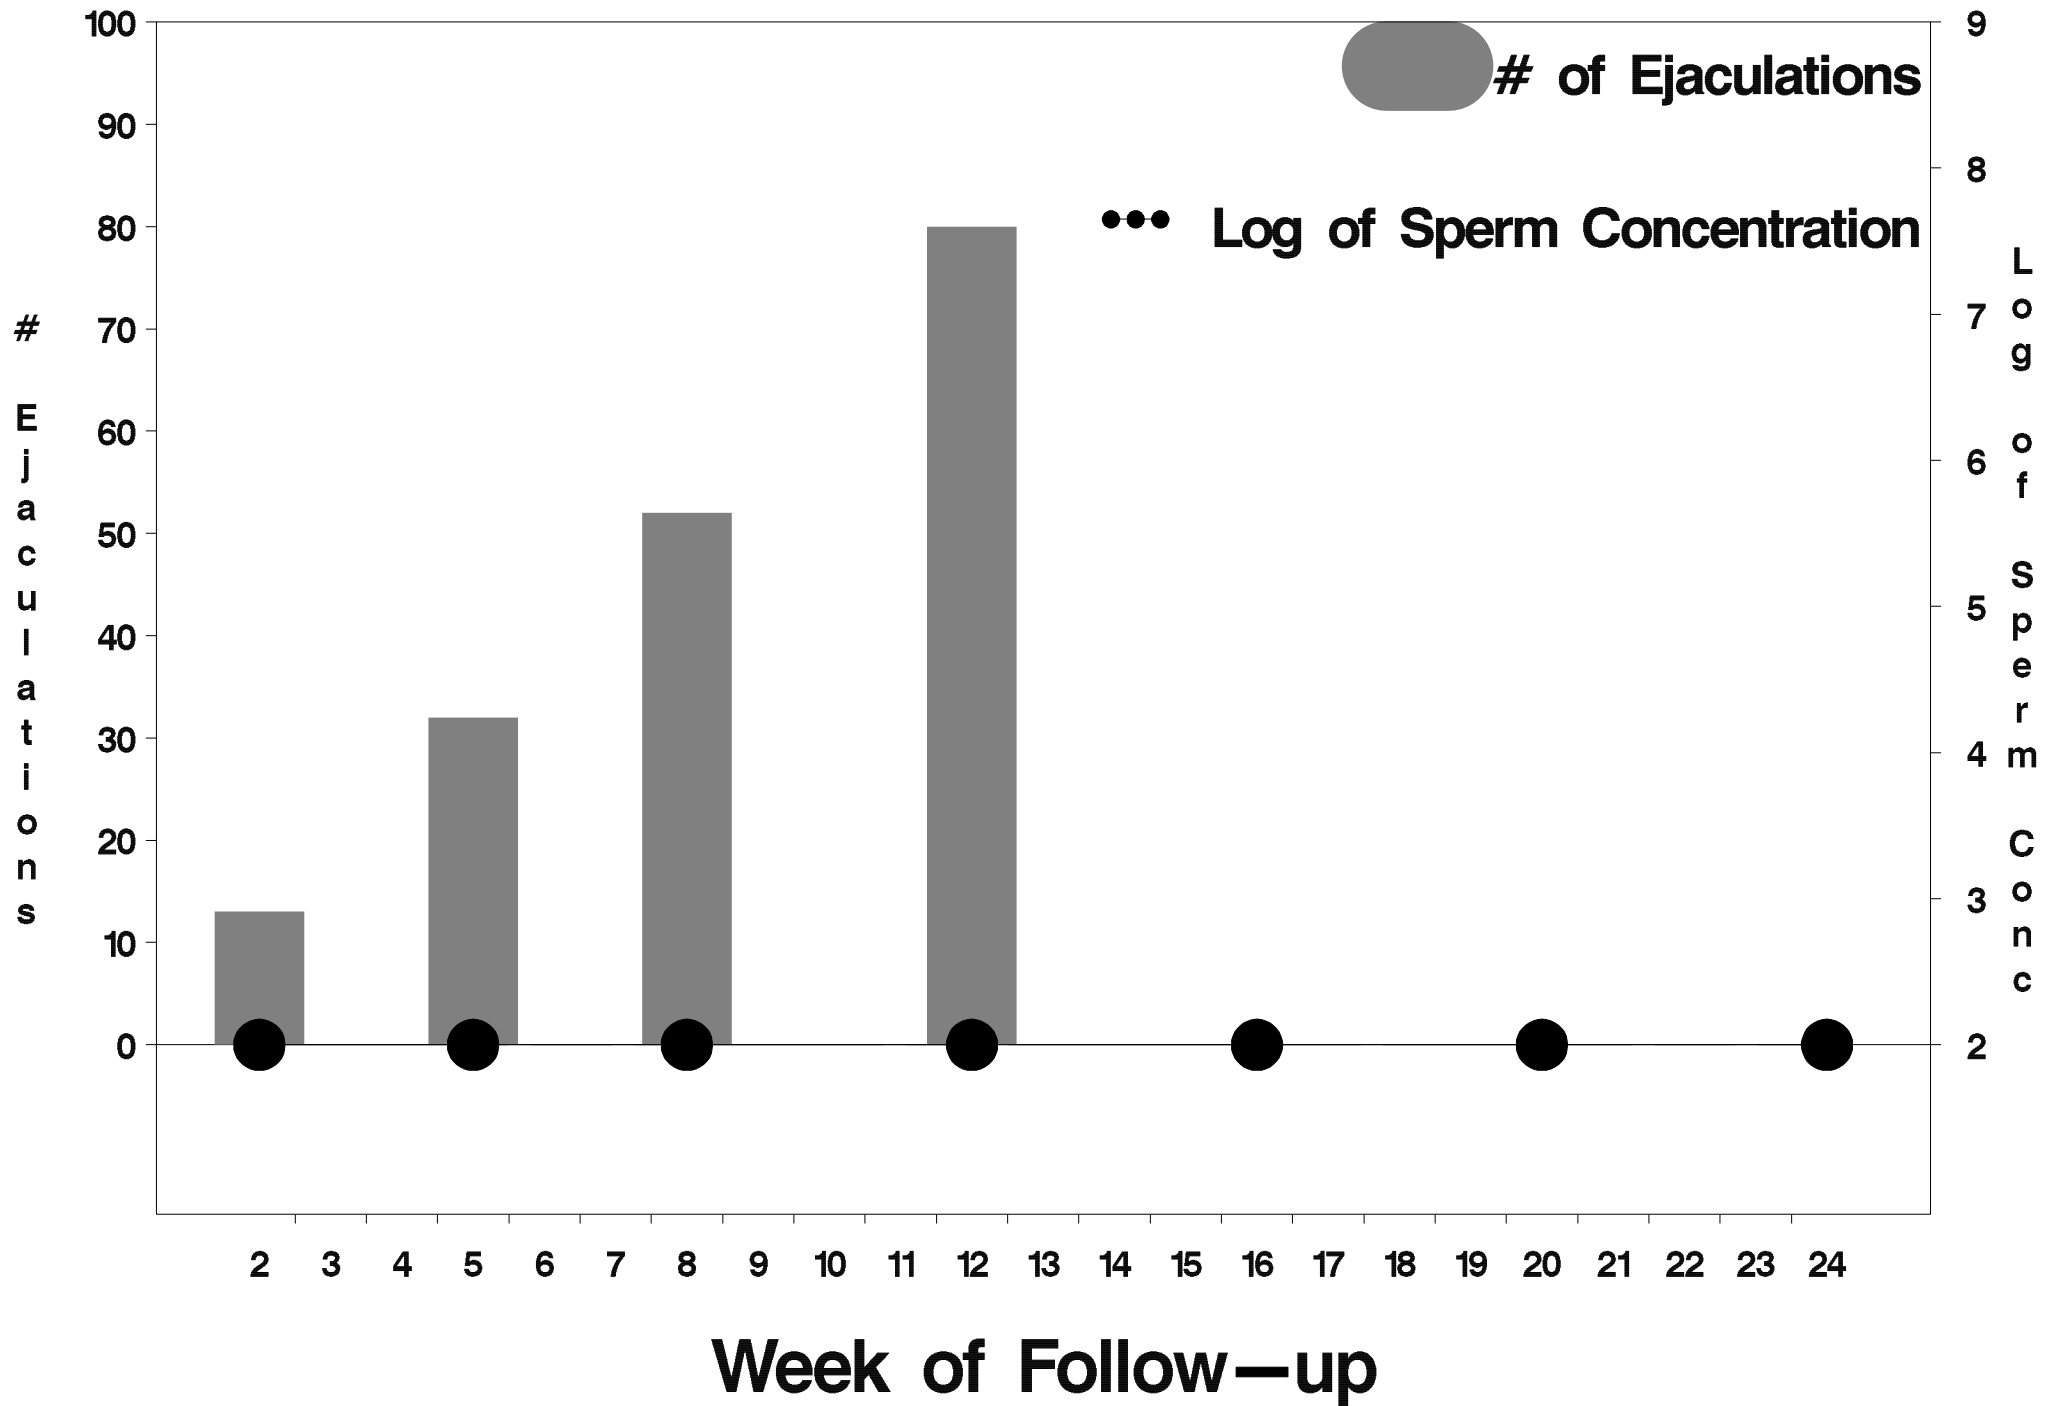

# Participant number= 400

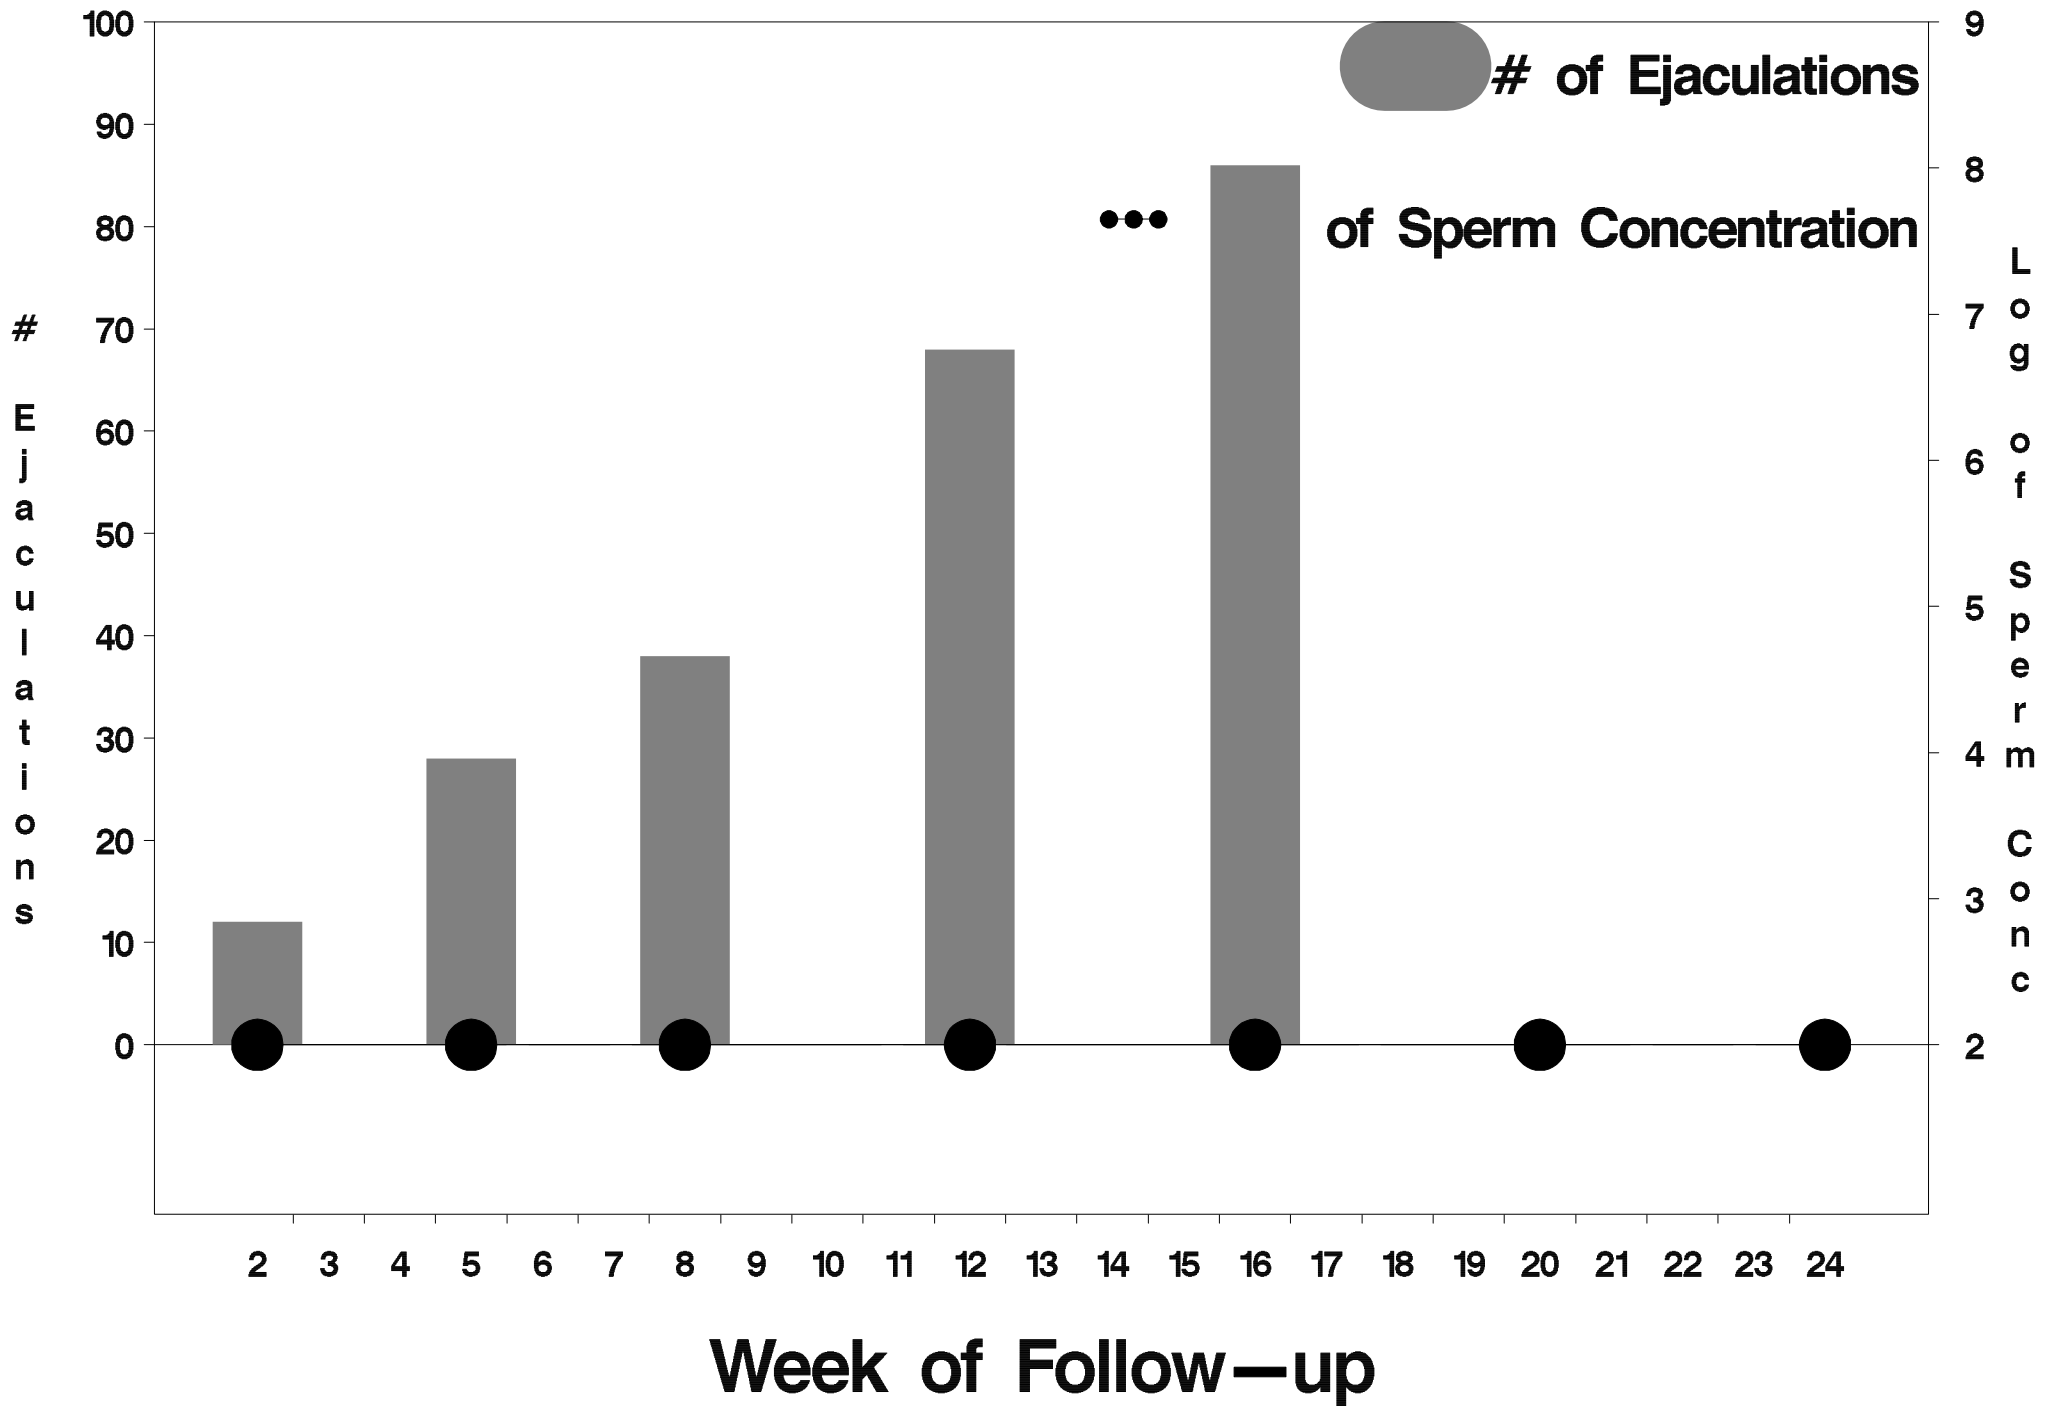

# Participant number= 501

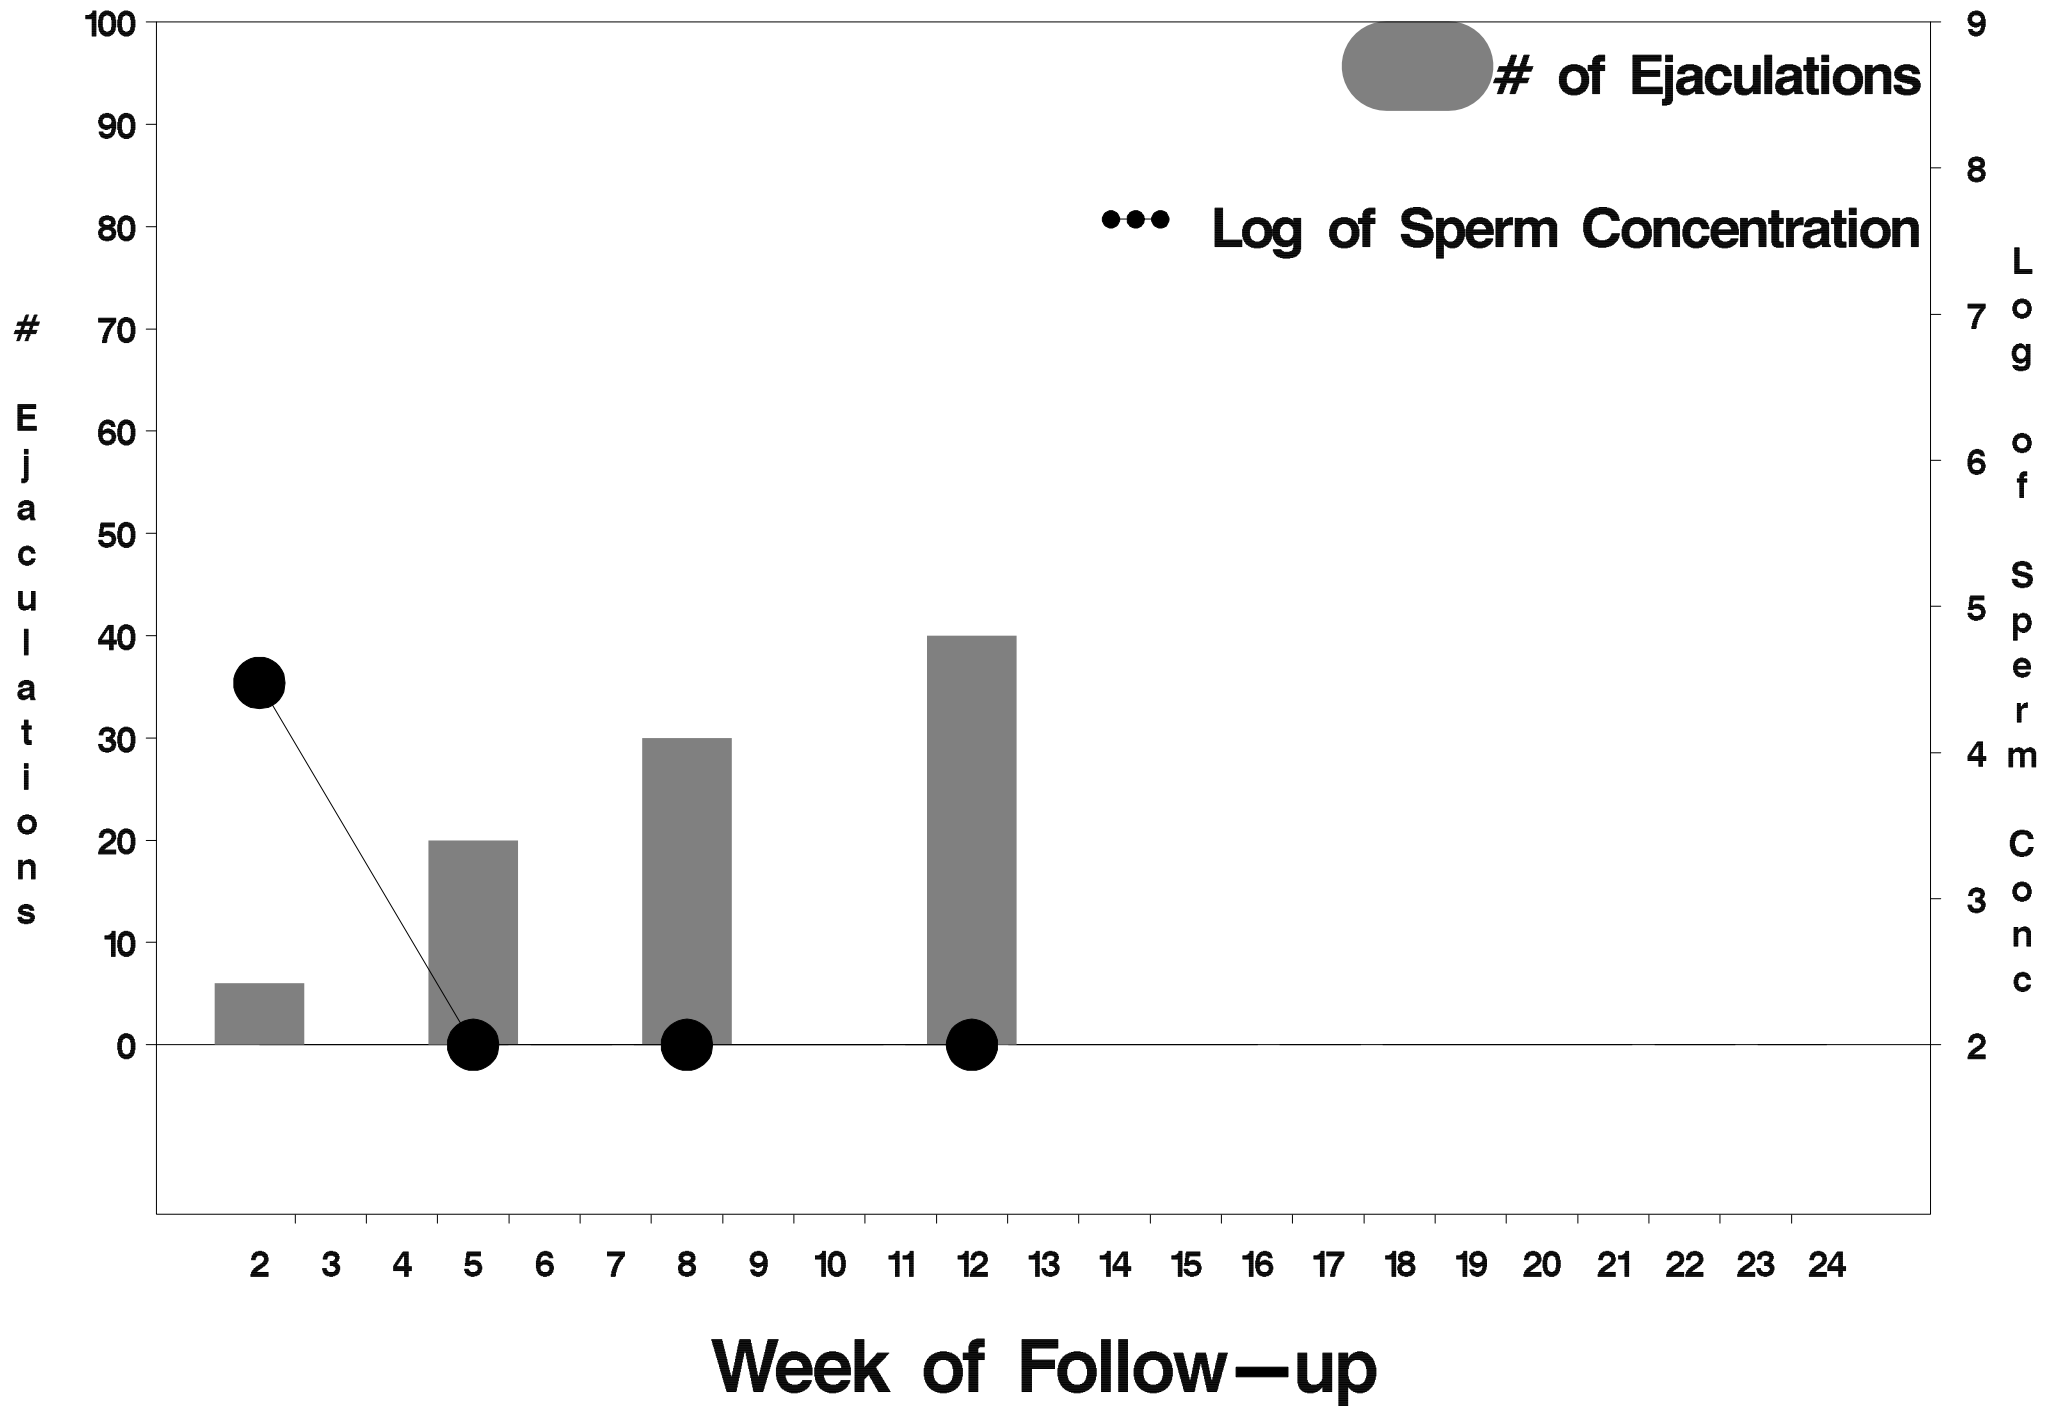



# Participant number= 502

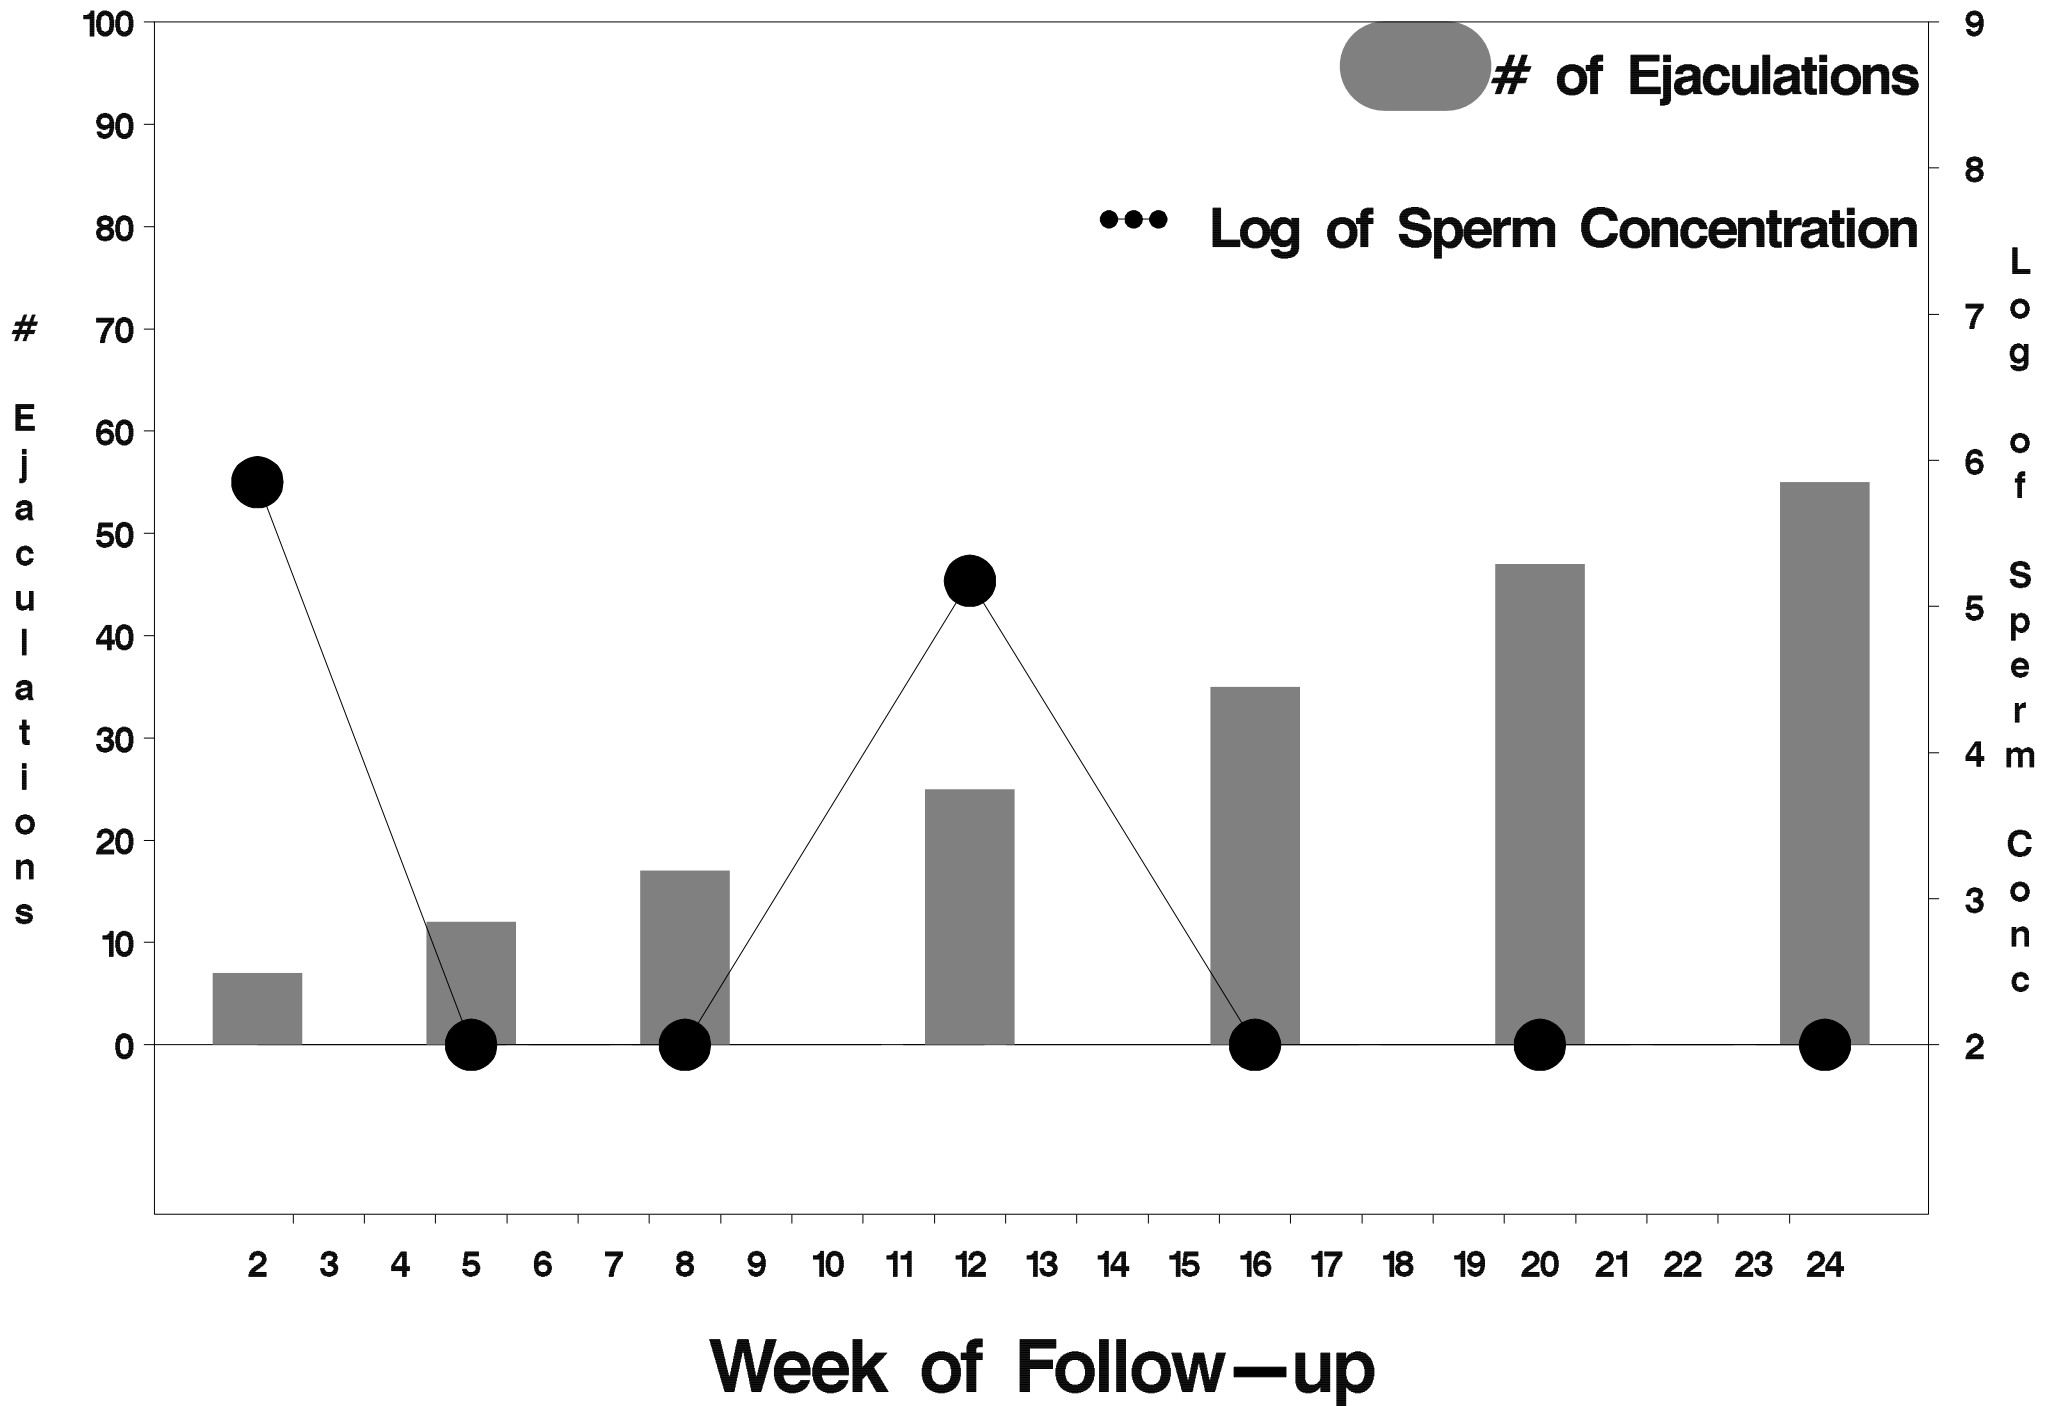

# Participant number= 503

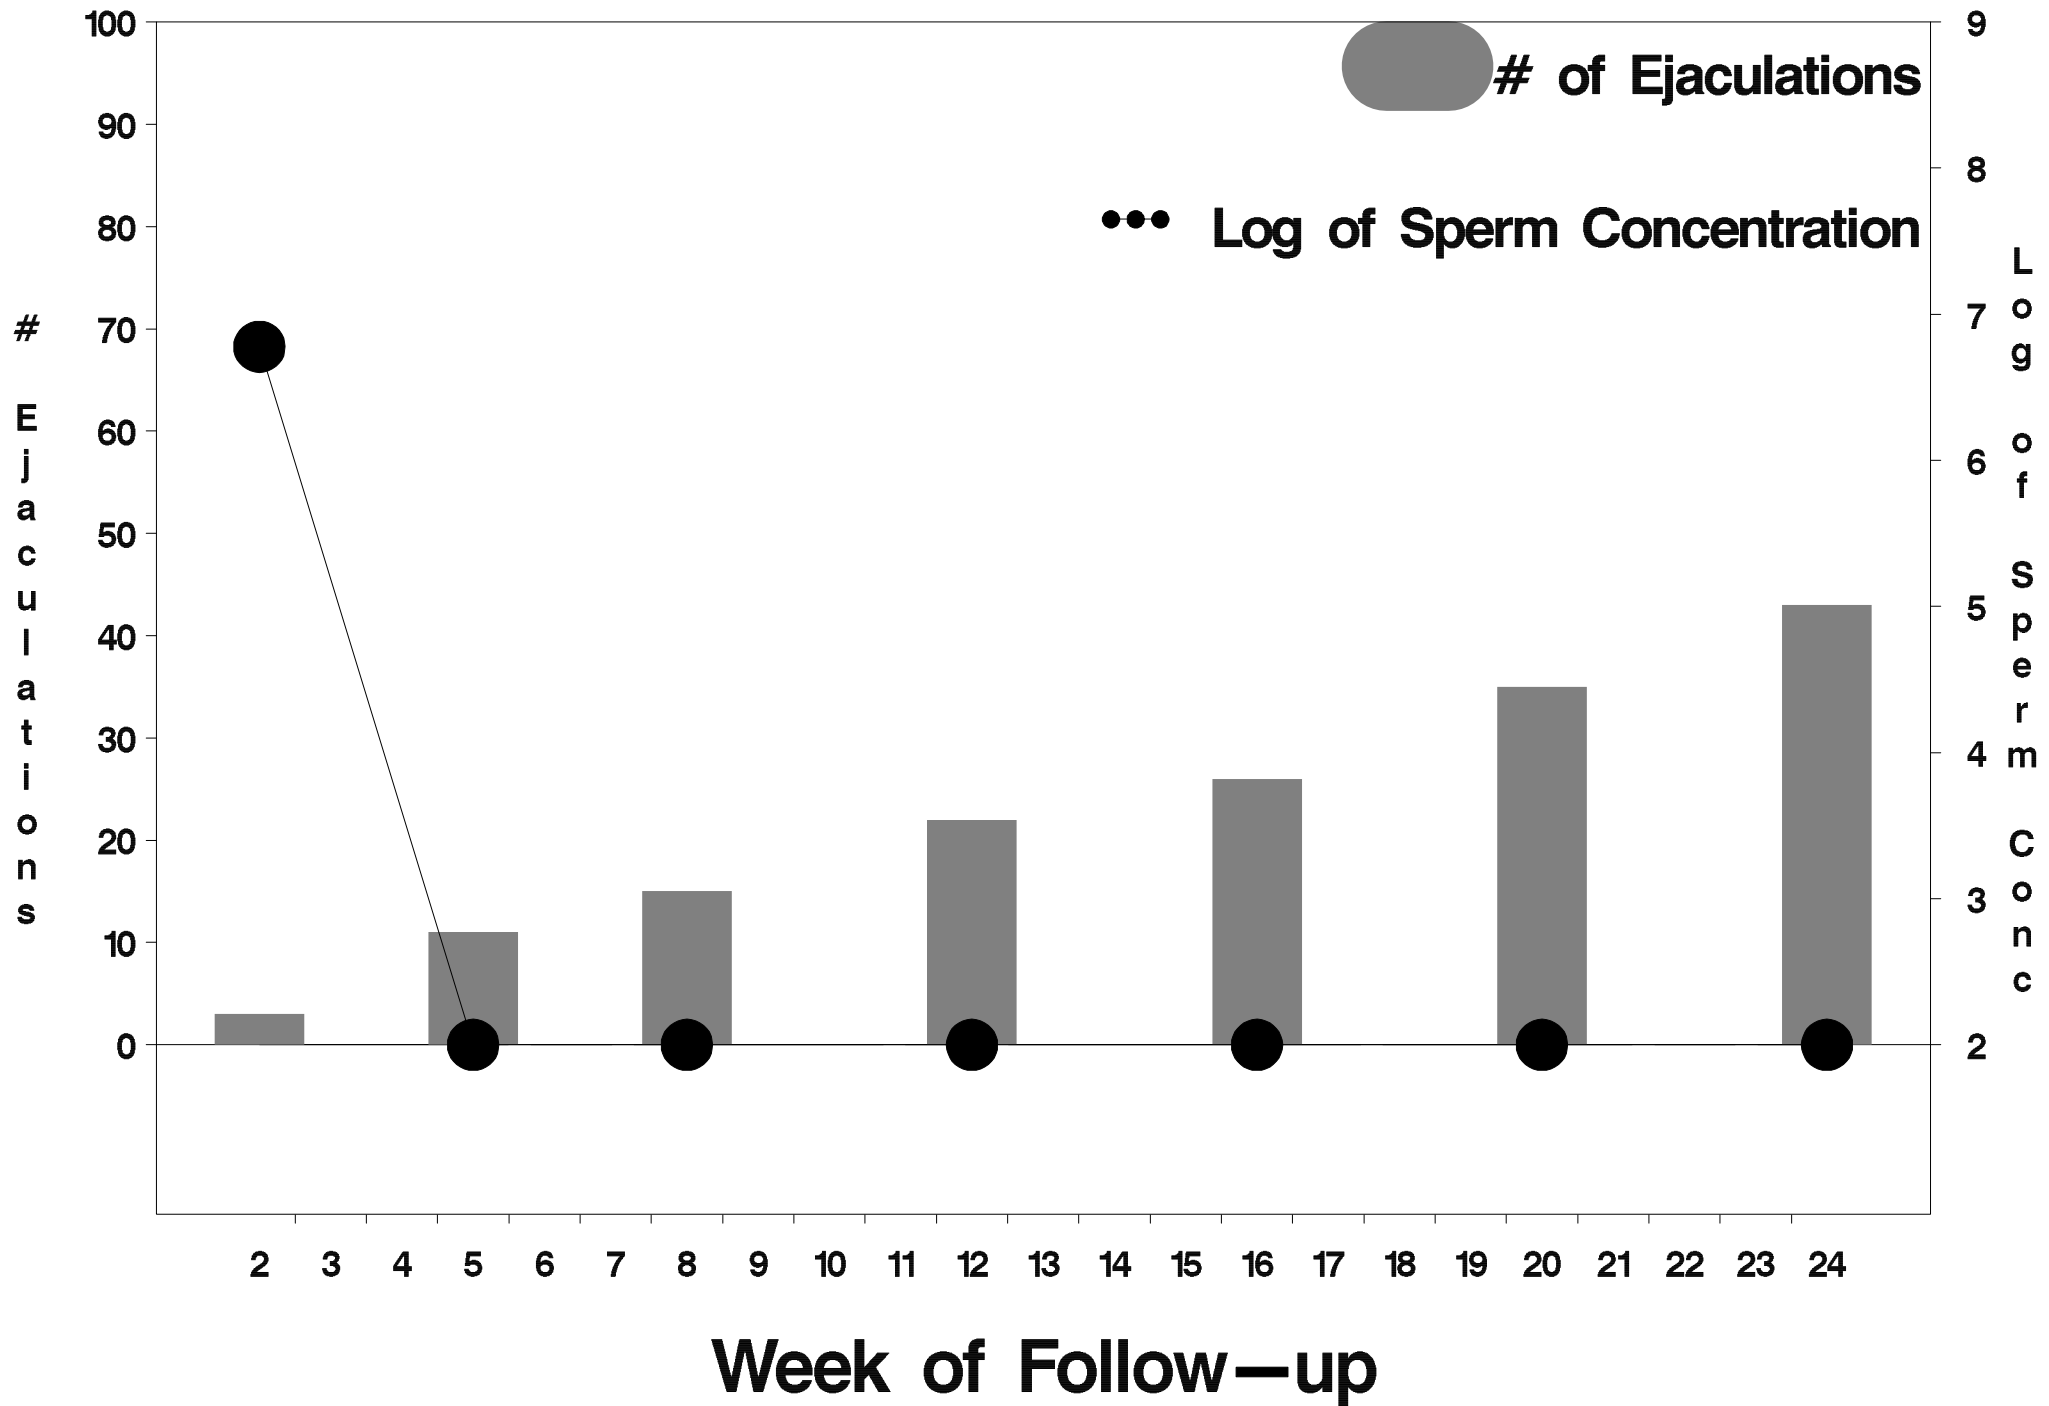

# Participant number= 504

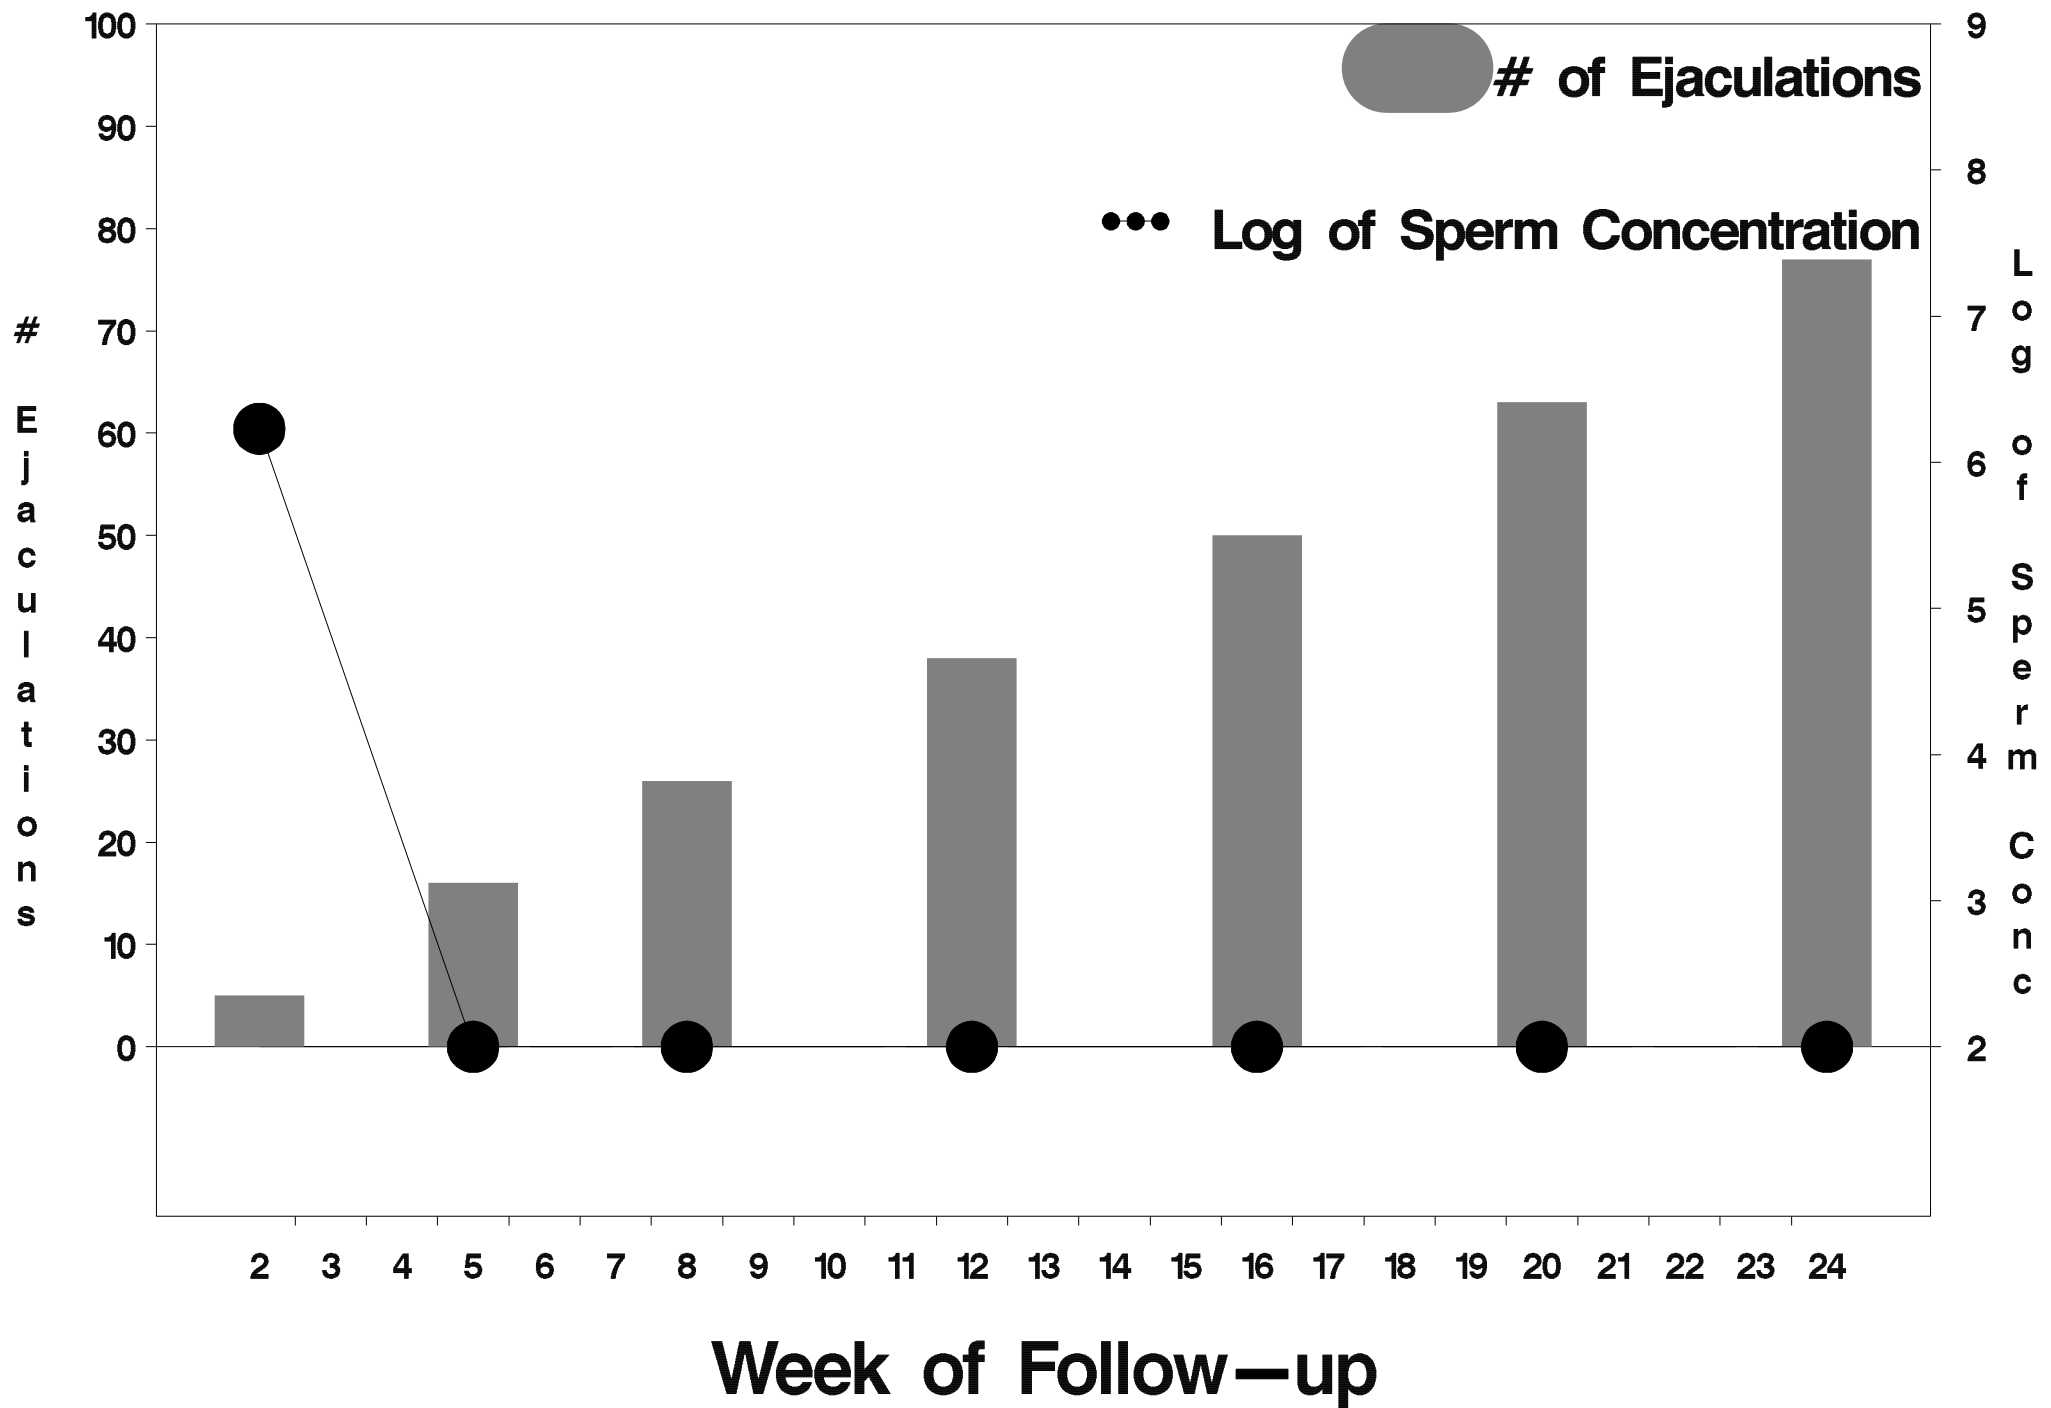

# Participant number= 505

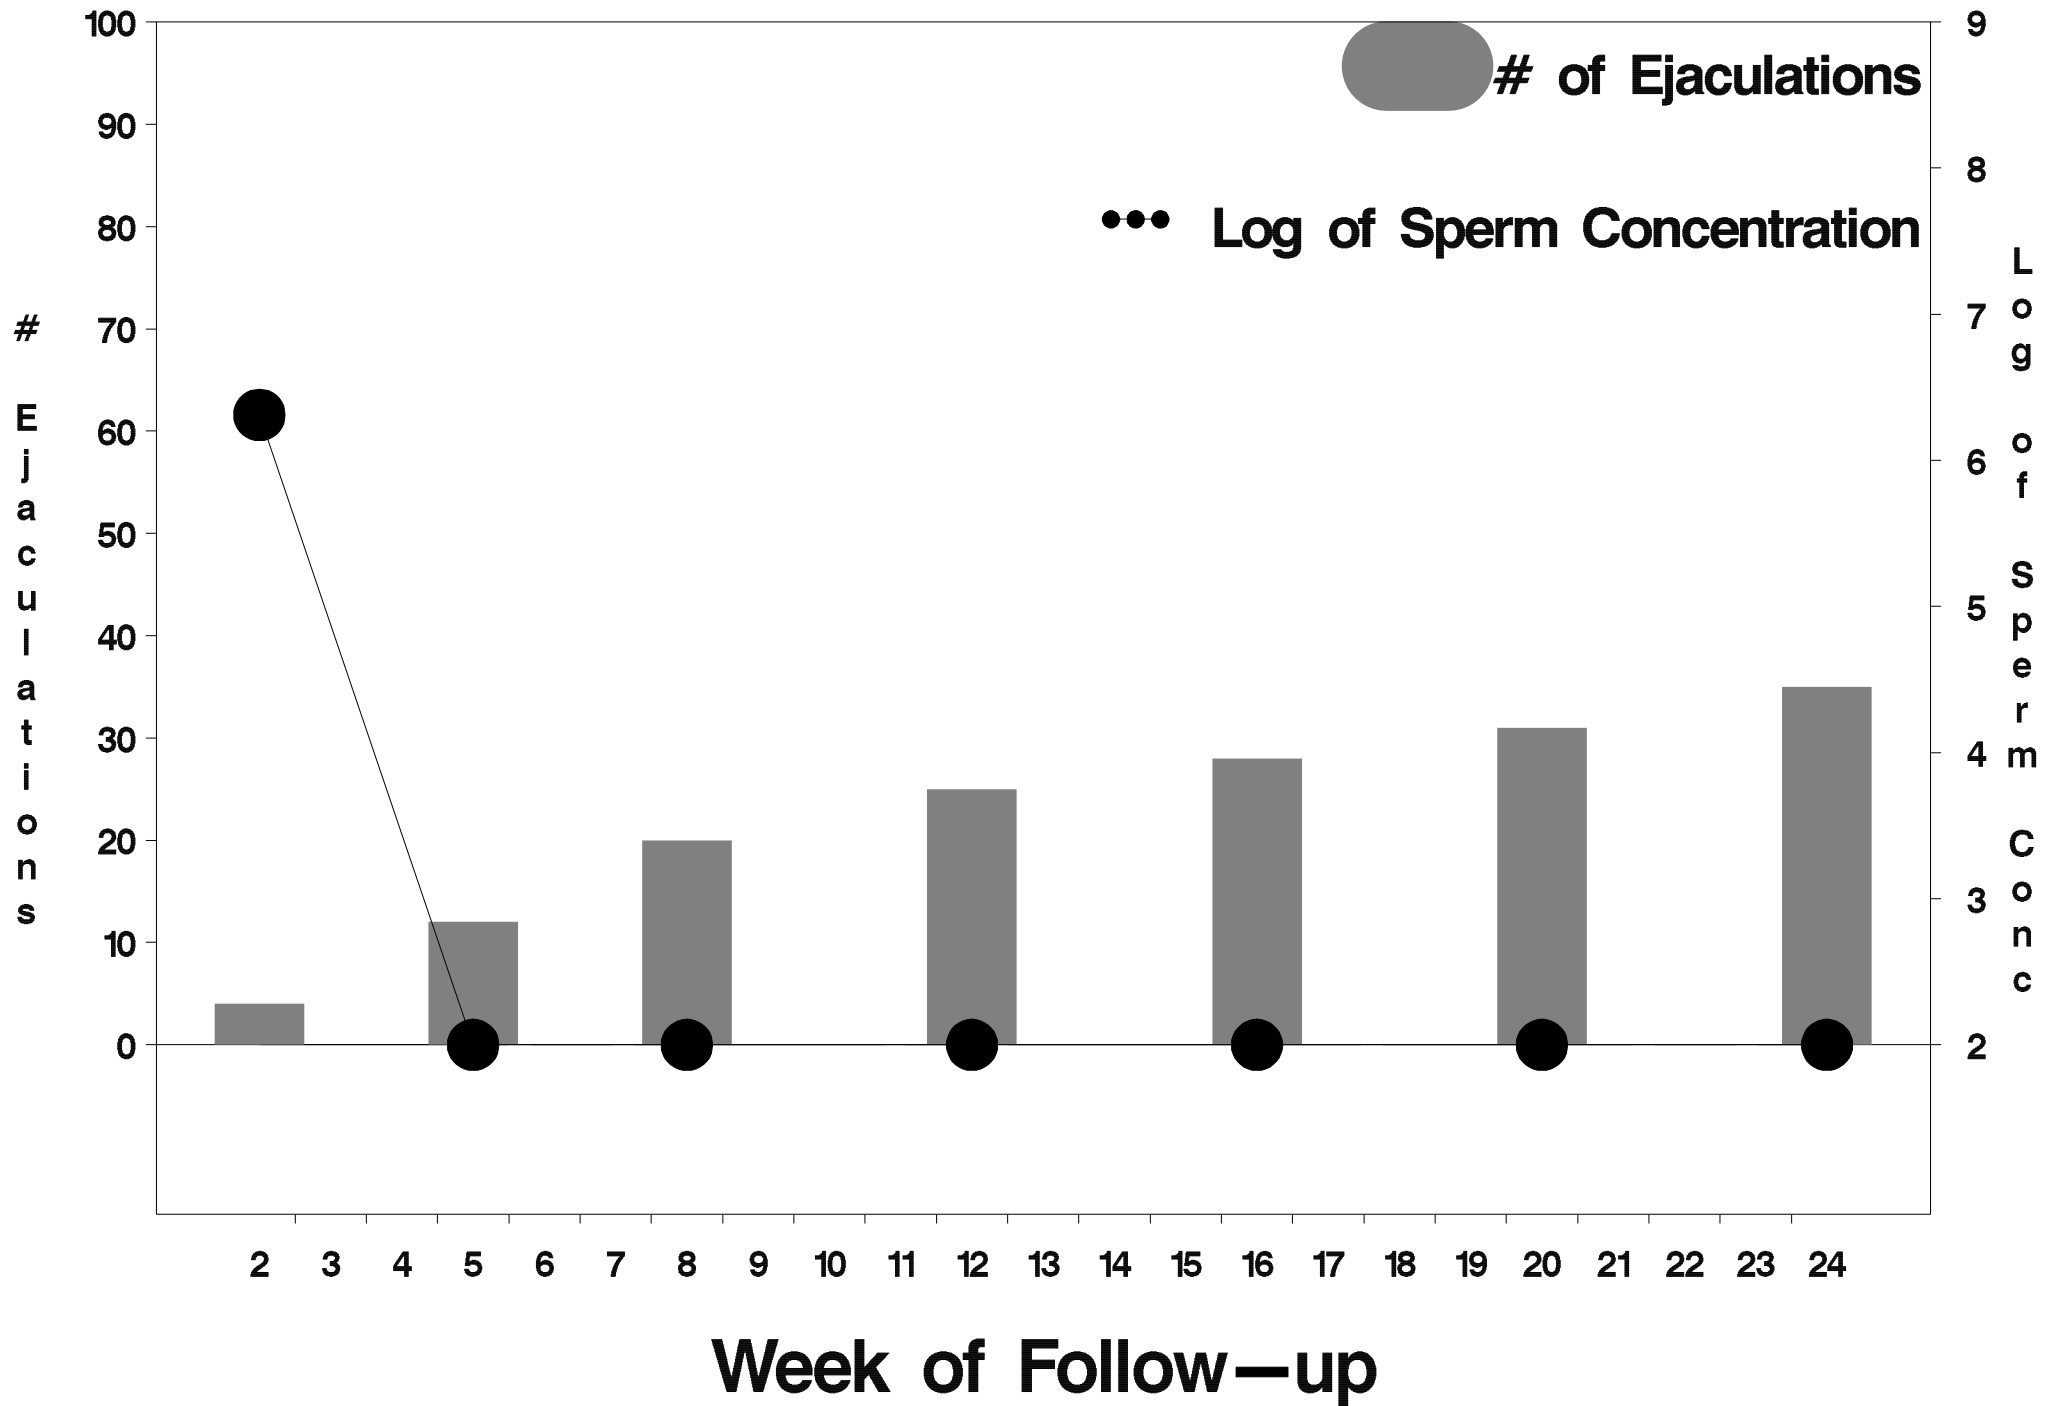

# Participant number= 506

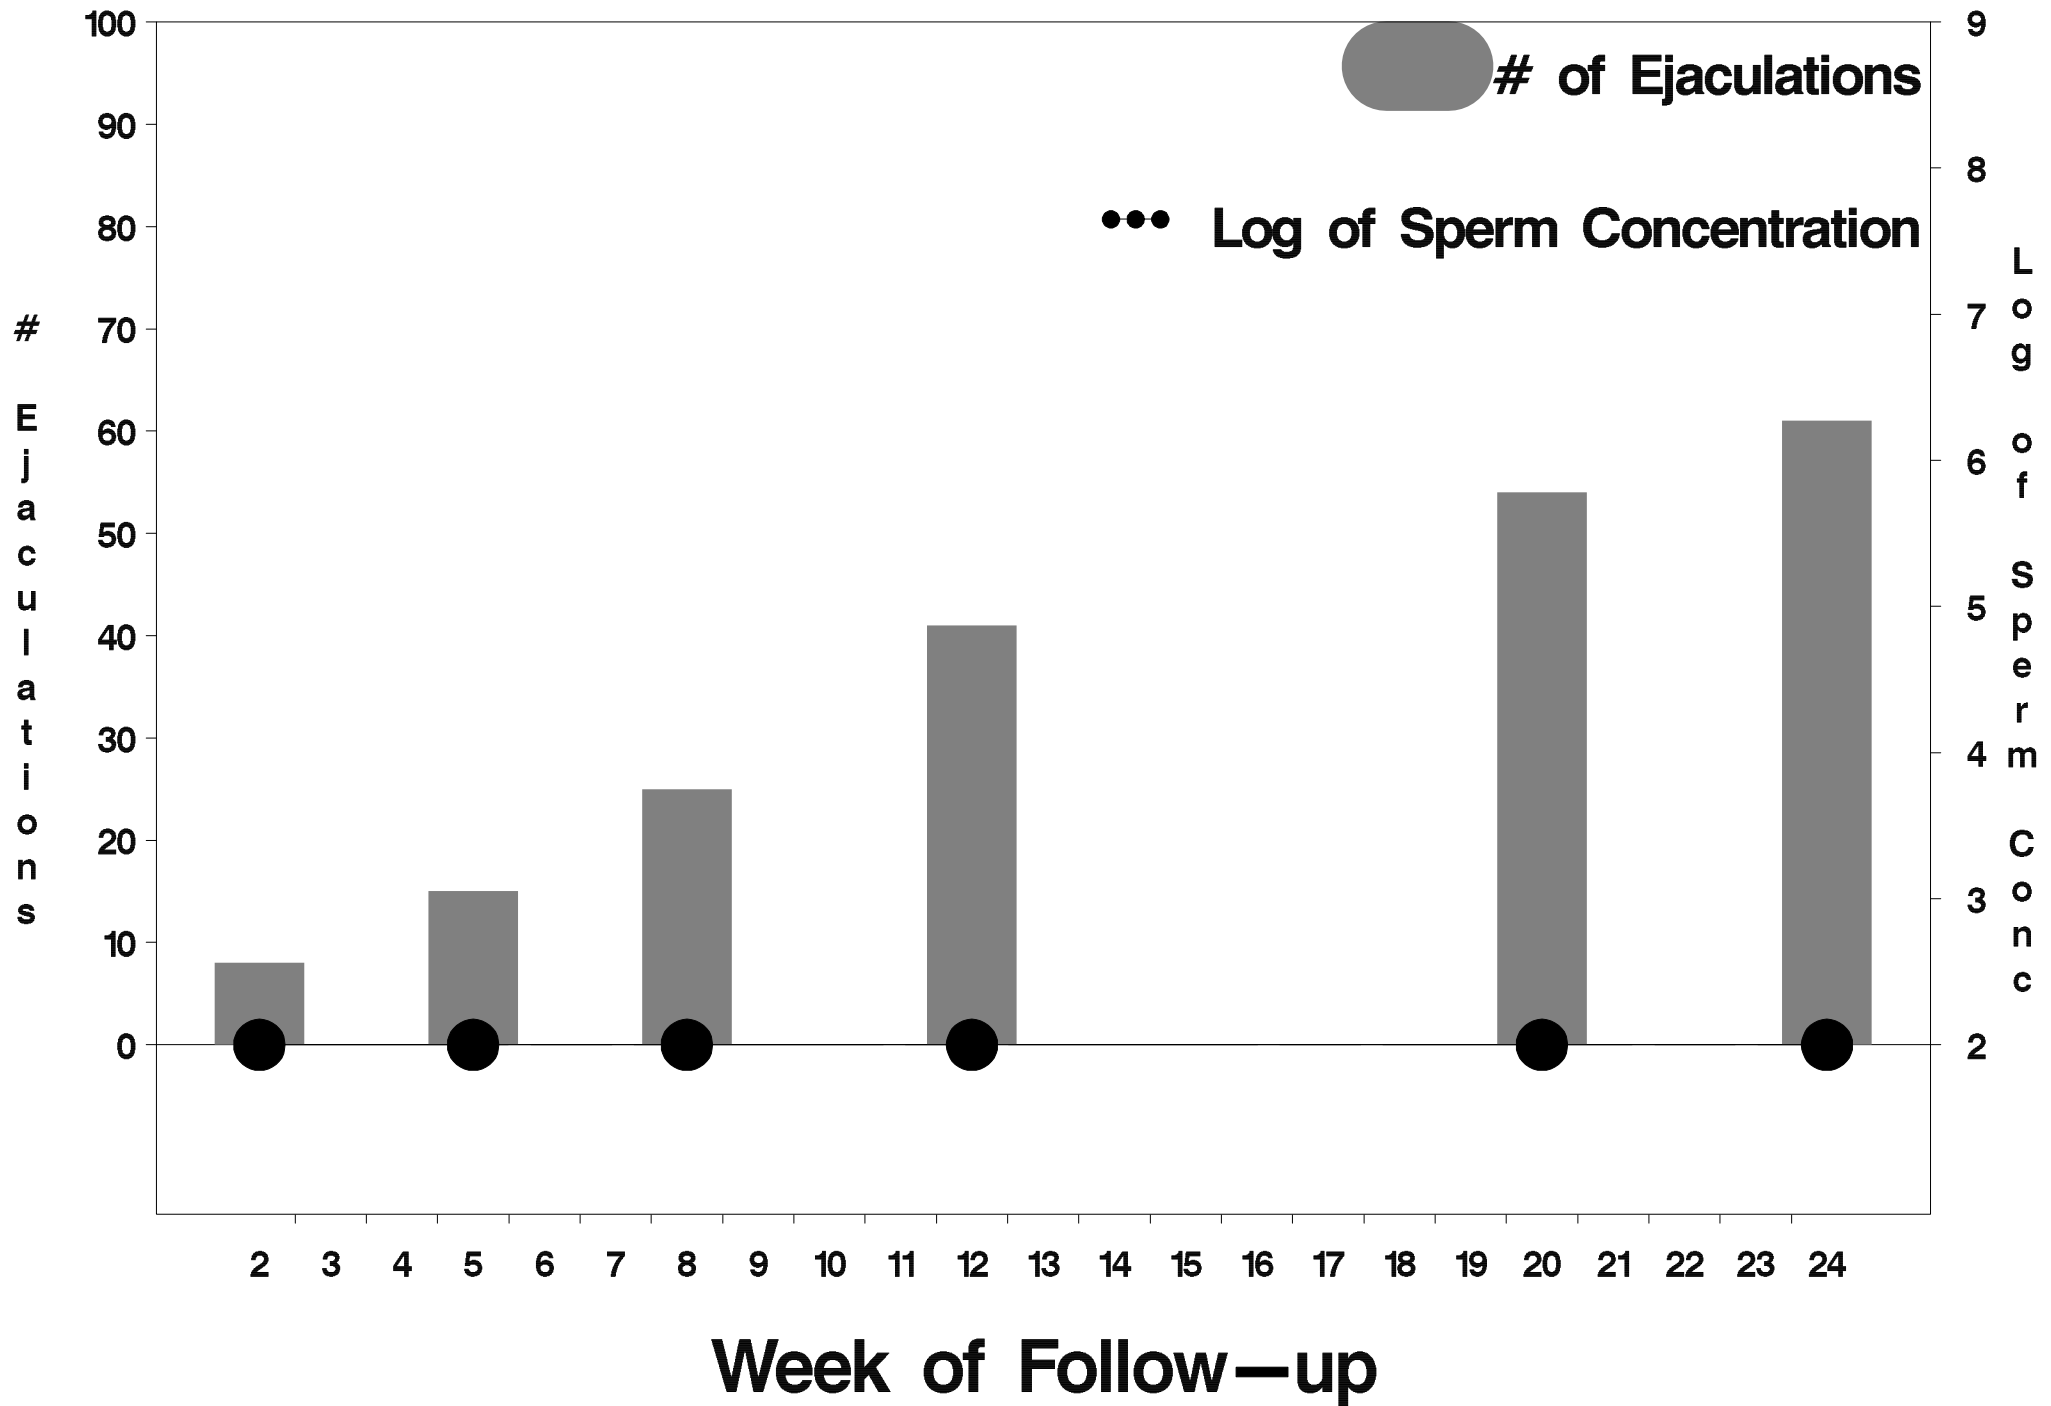

# Participant number= 507

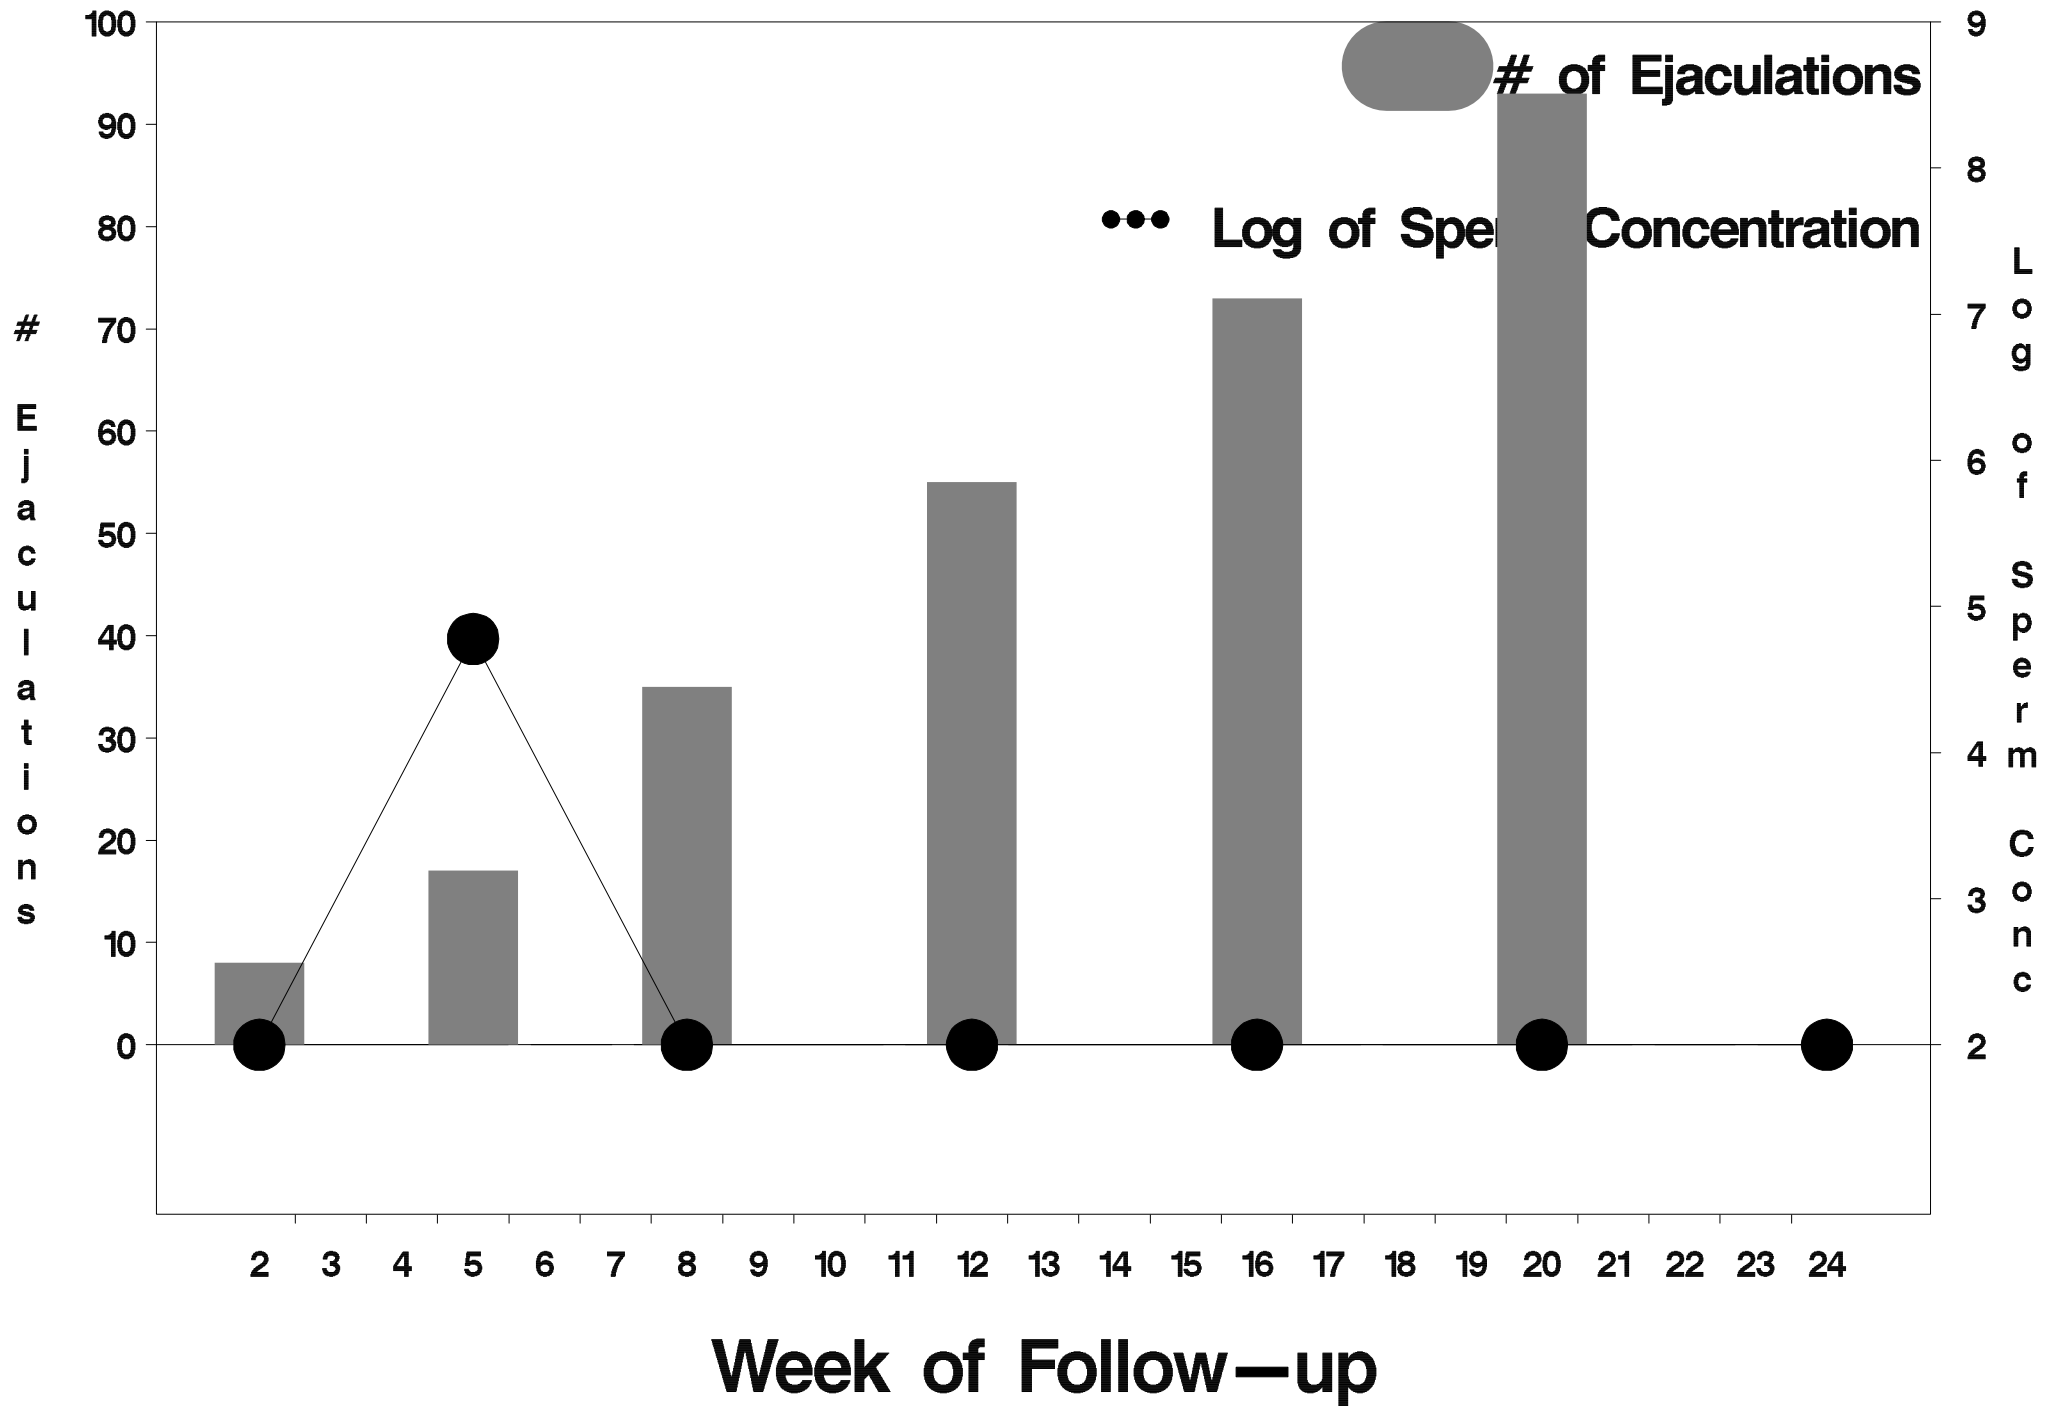

# Participant number= 508

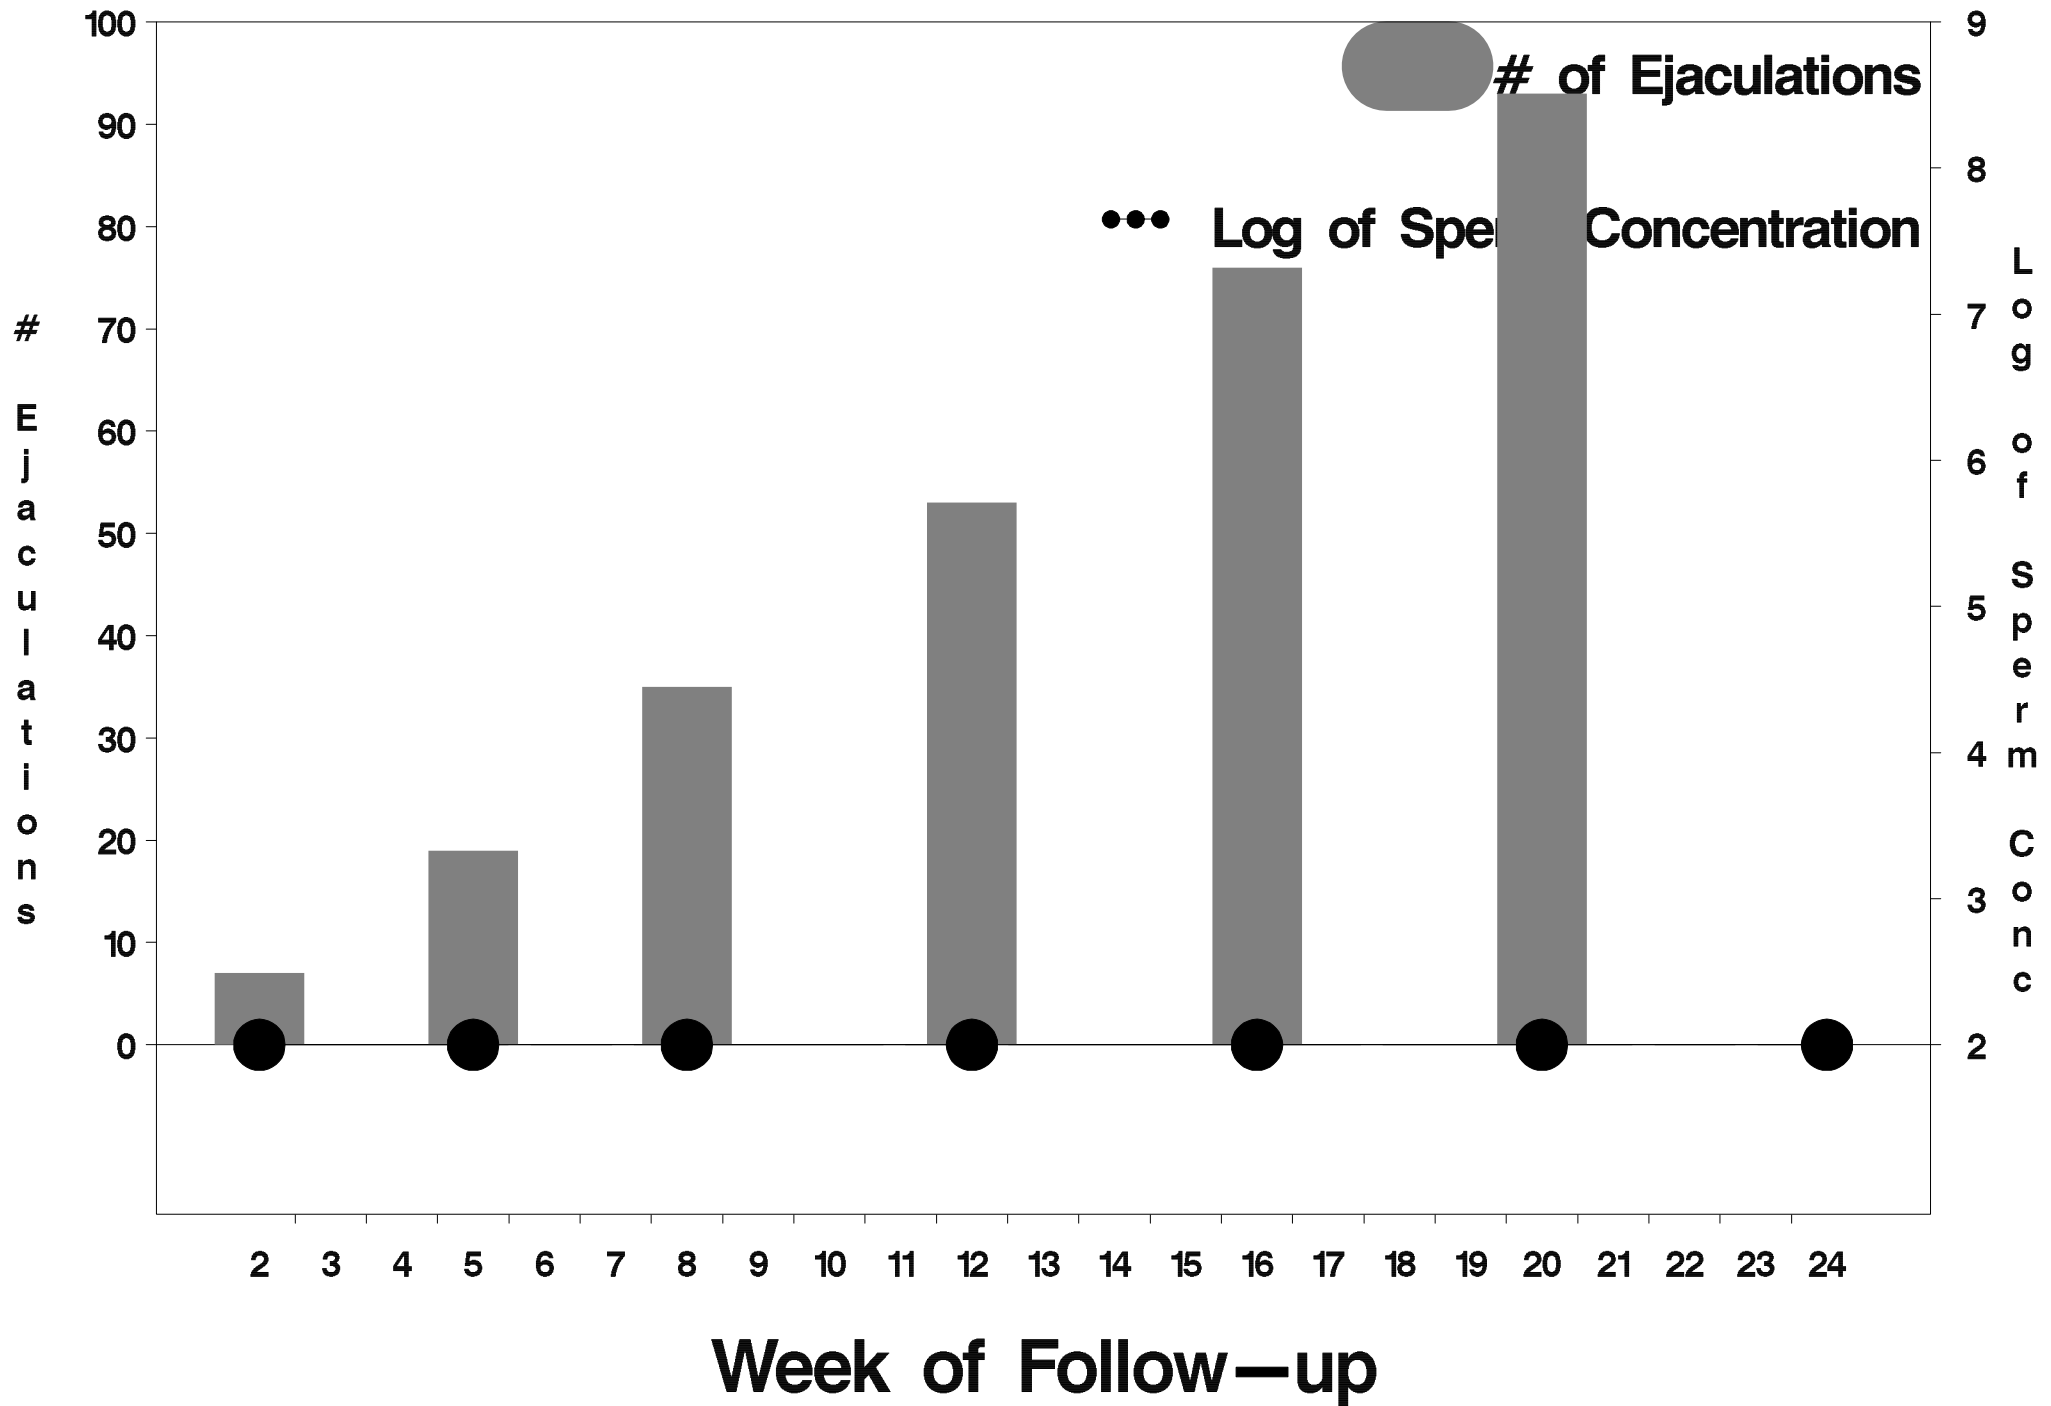

# Participant number= 510

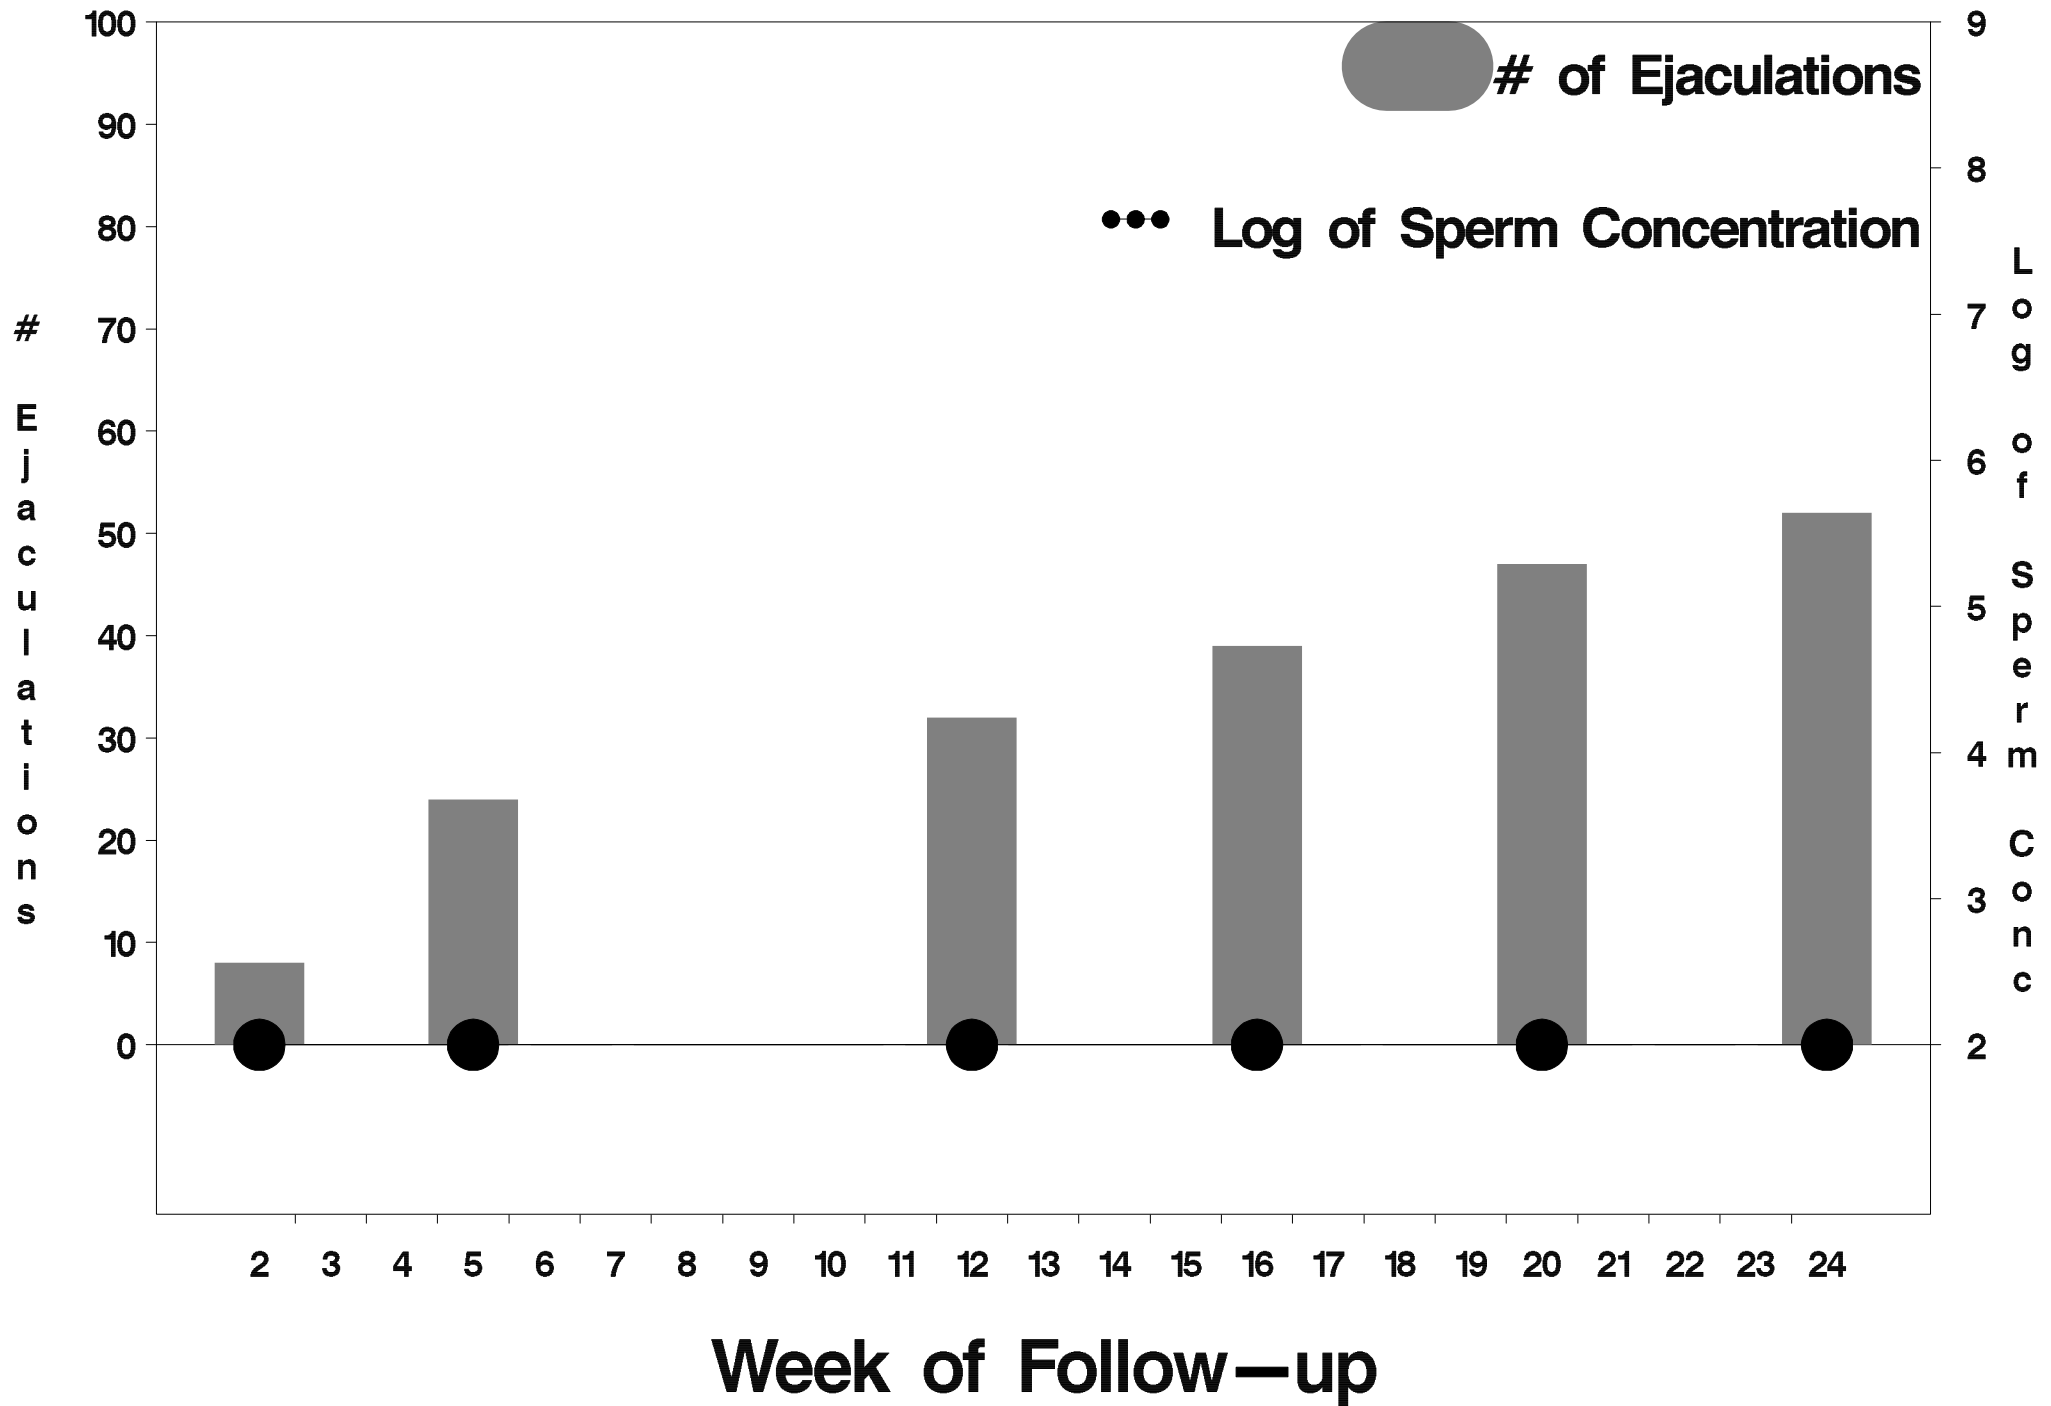



# Participant number= 511

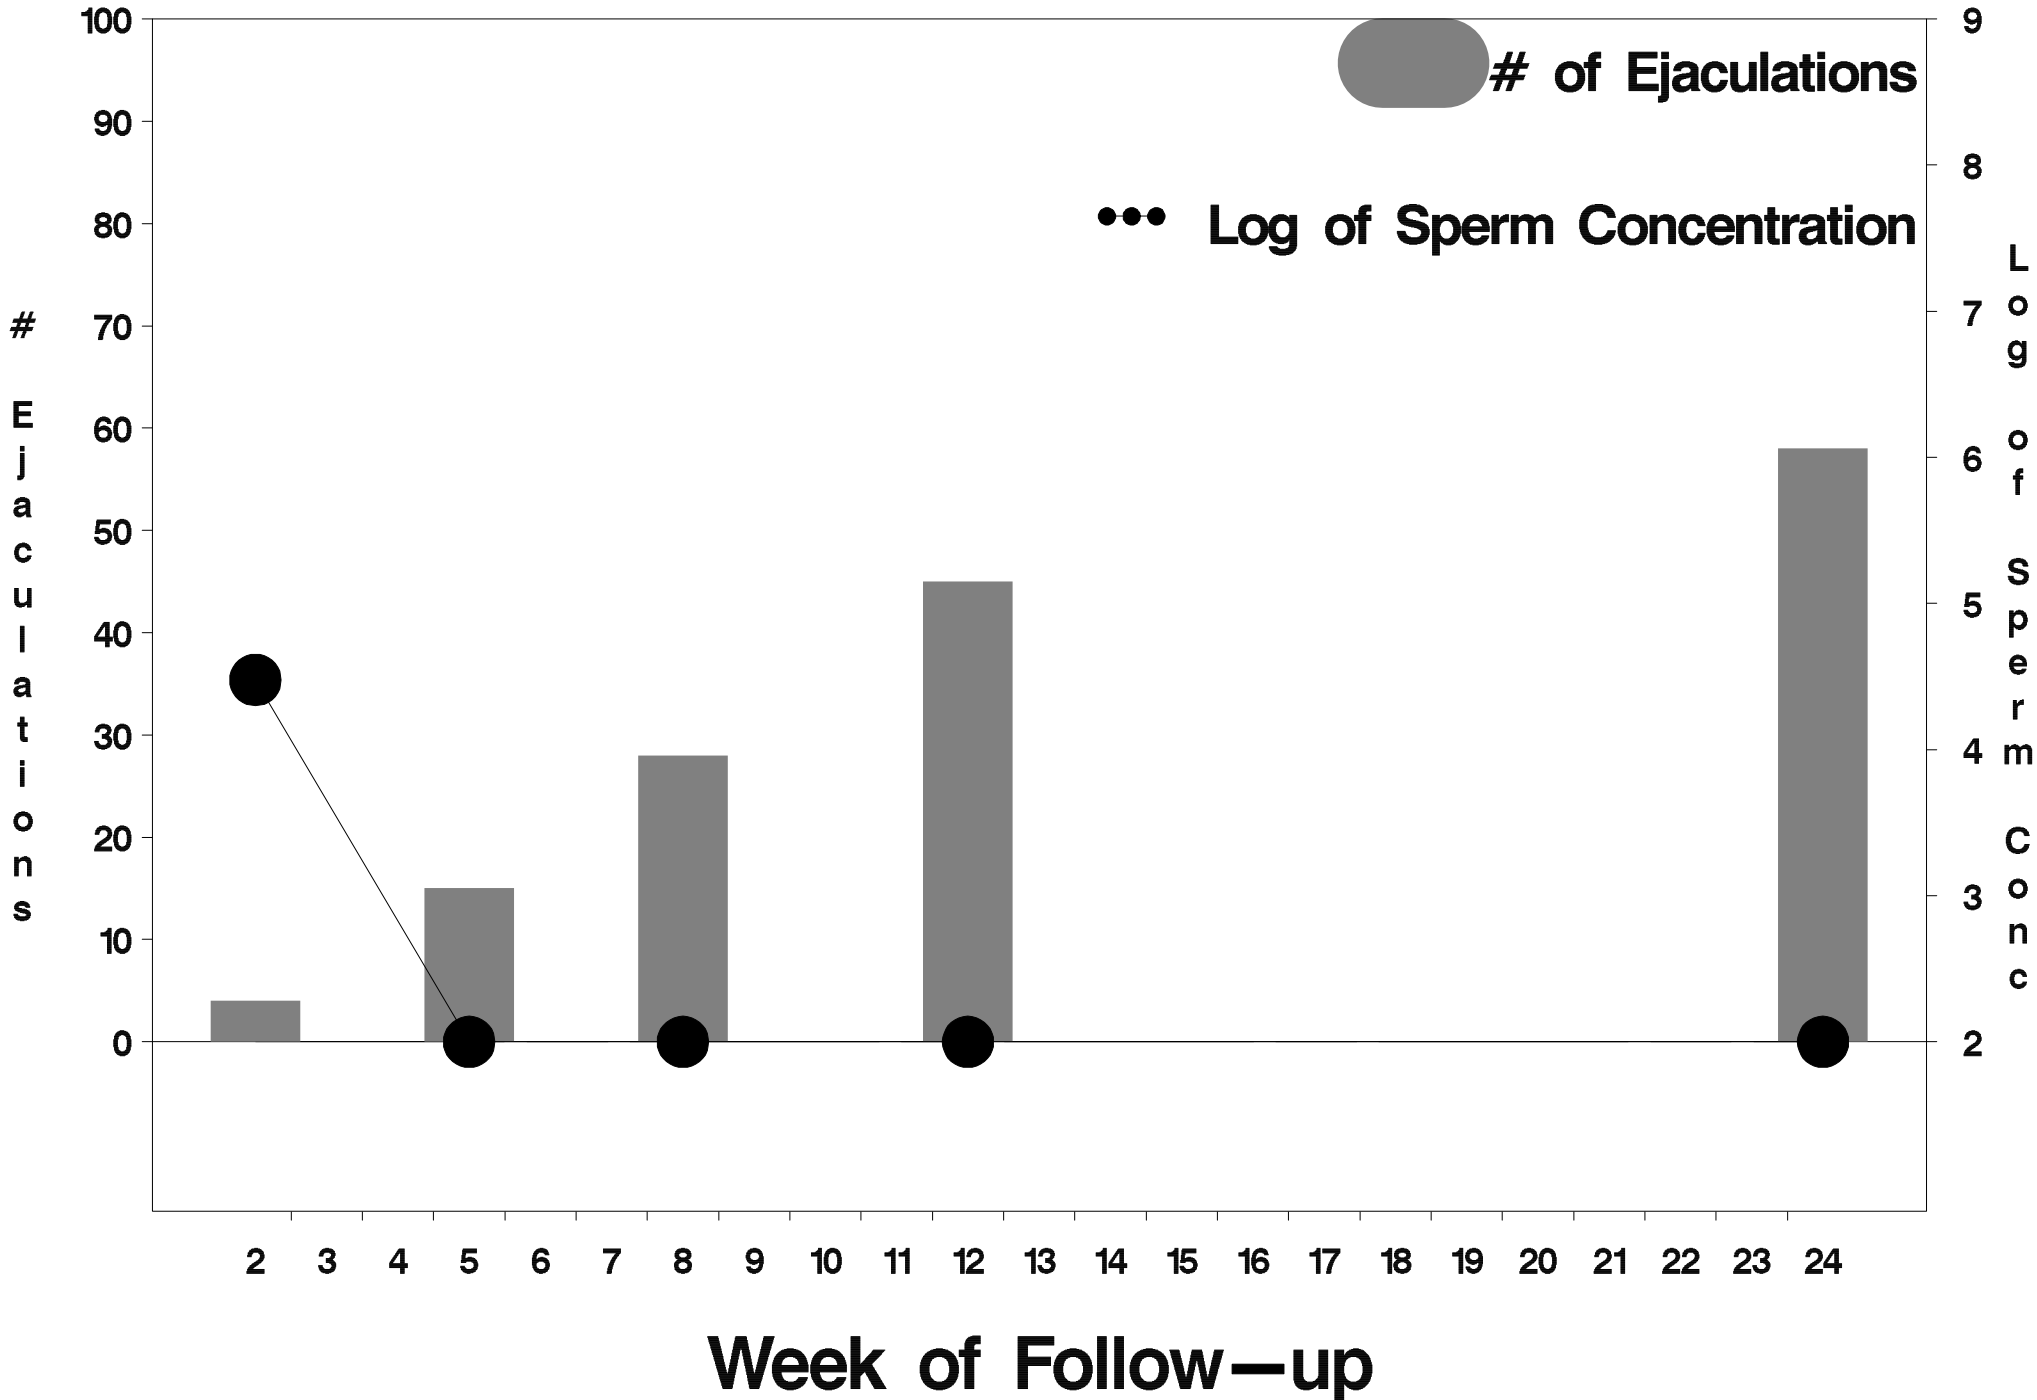

# Participant number= 512

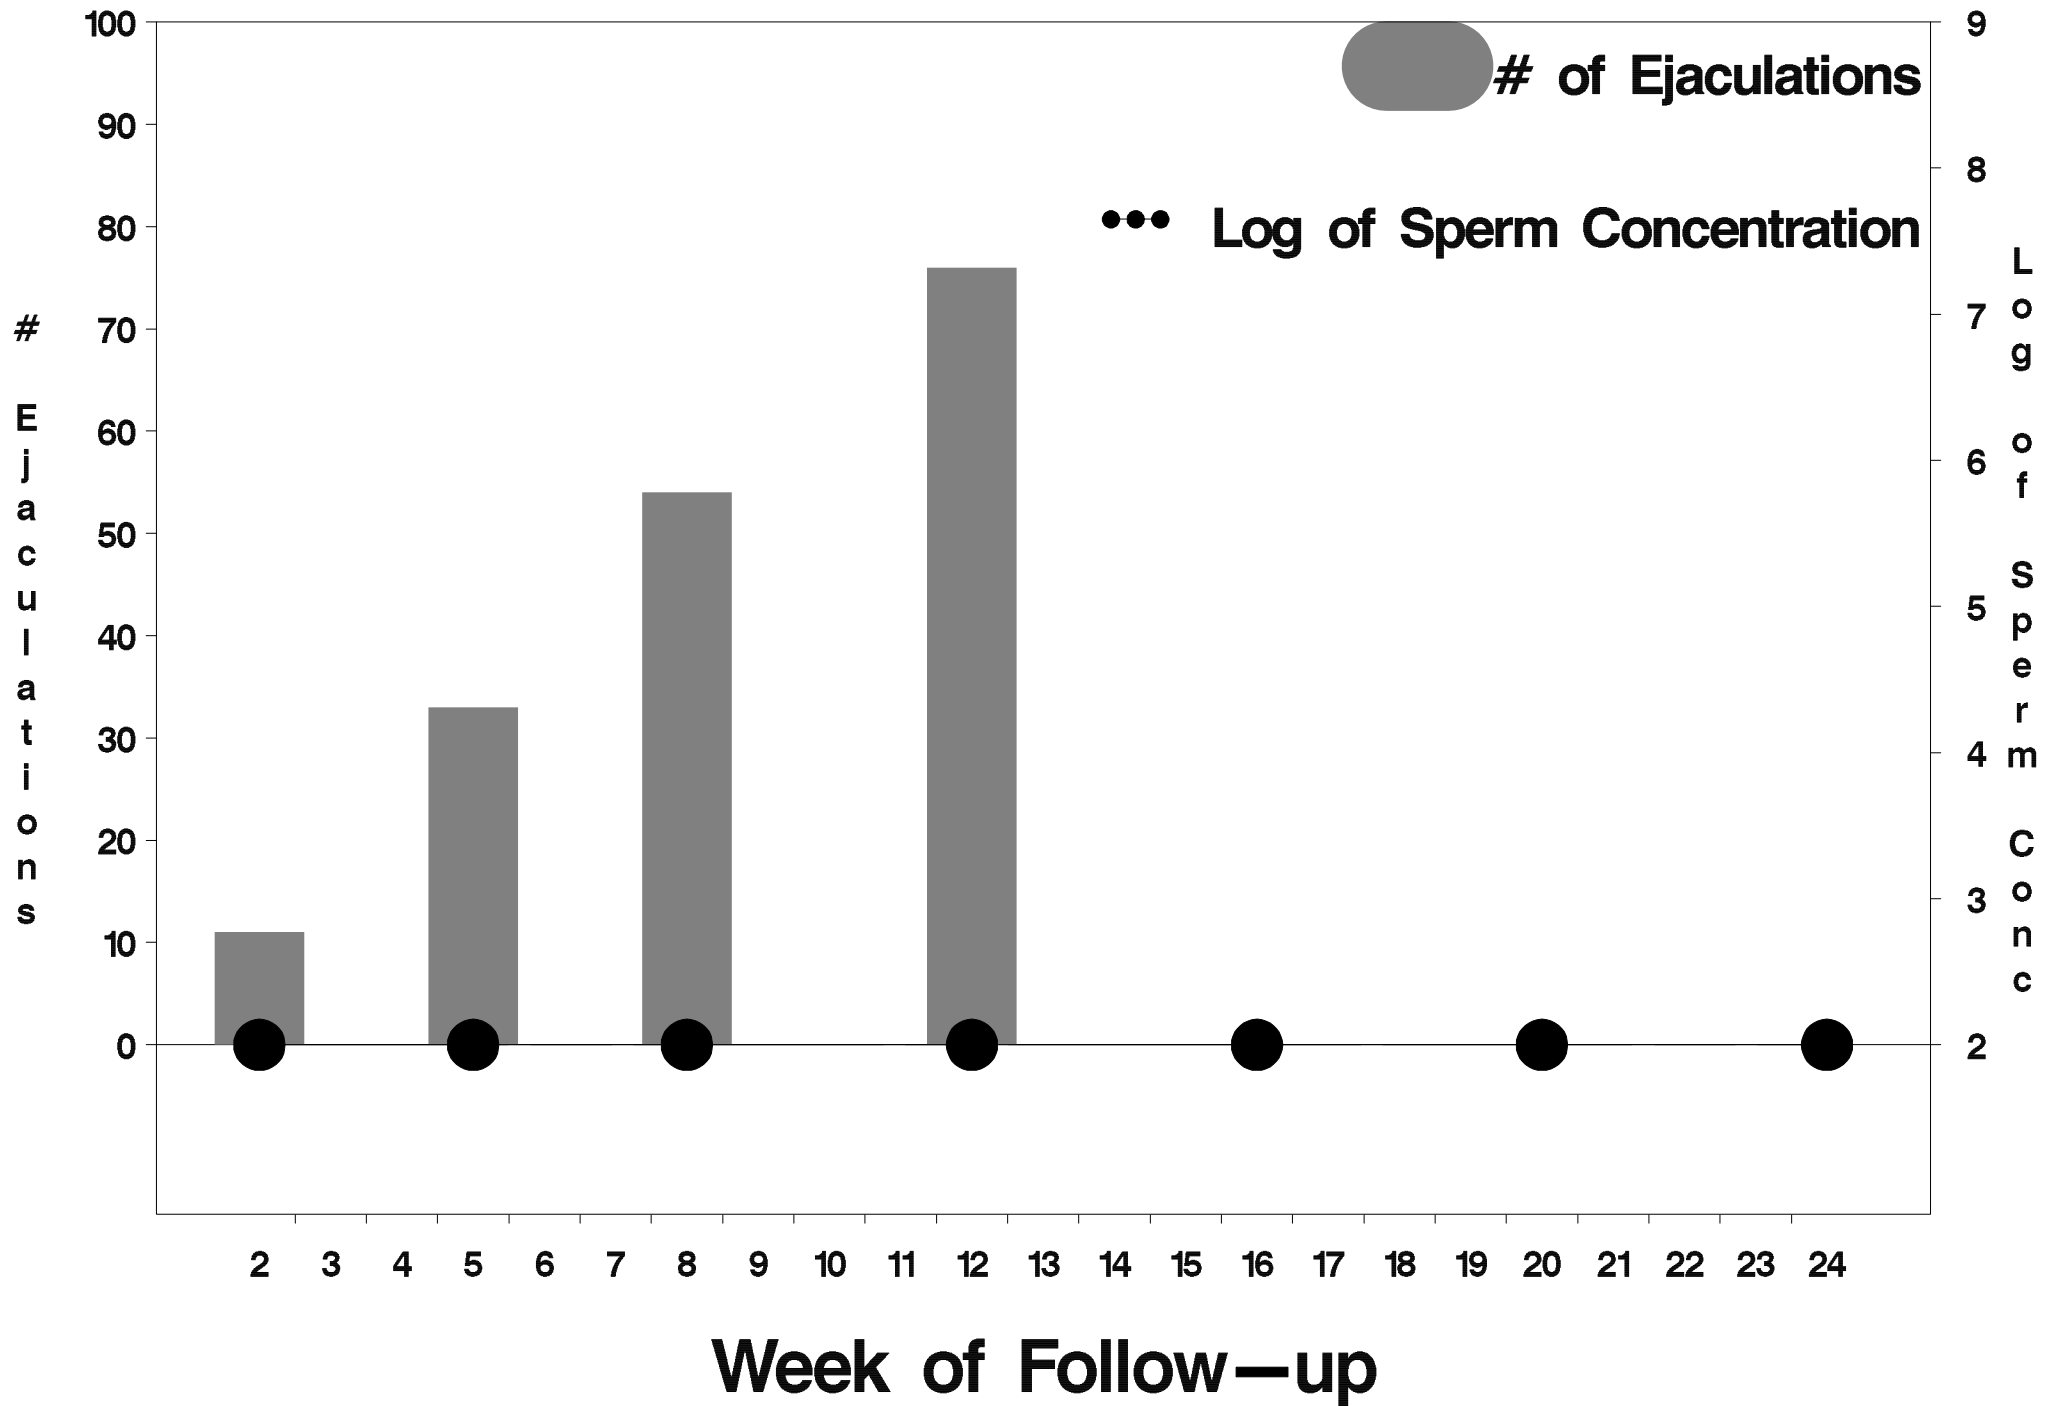

# Participant number= 513

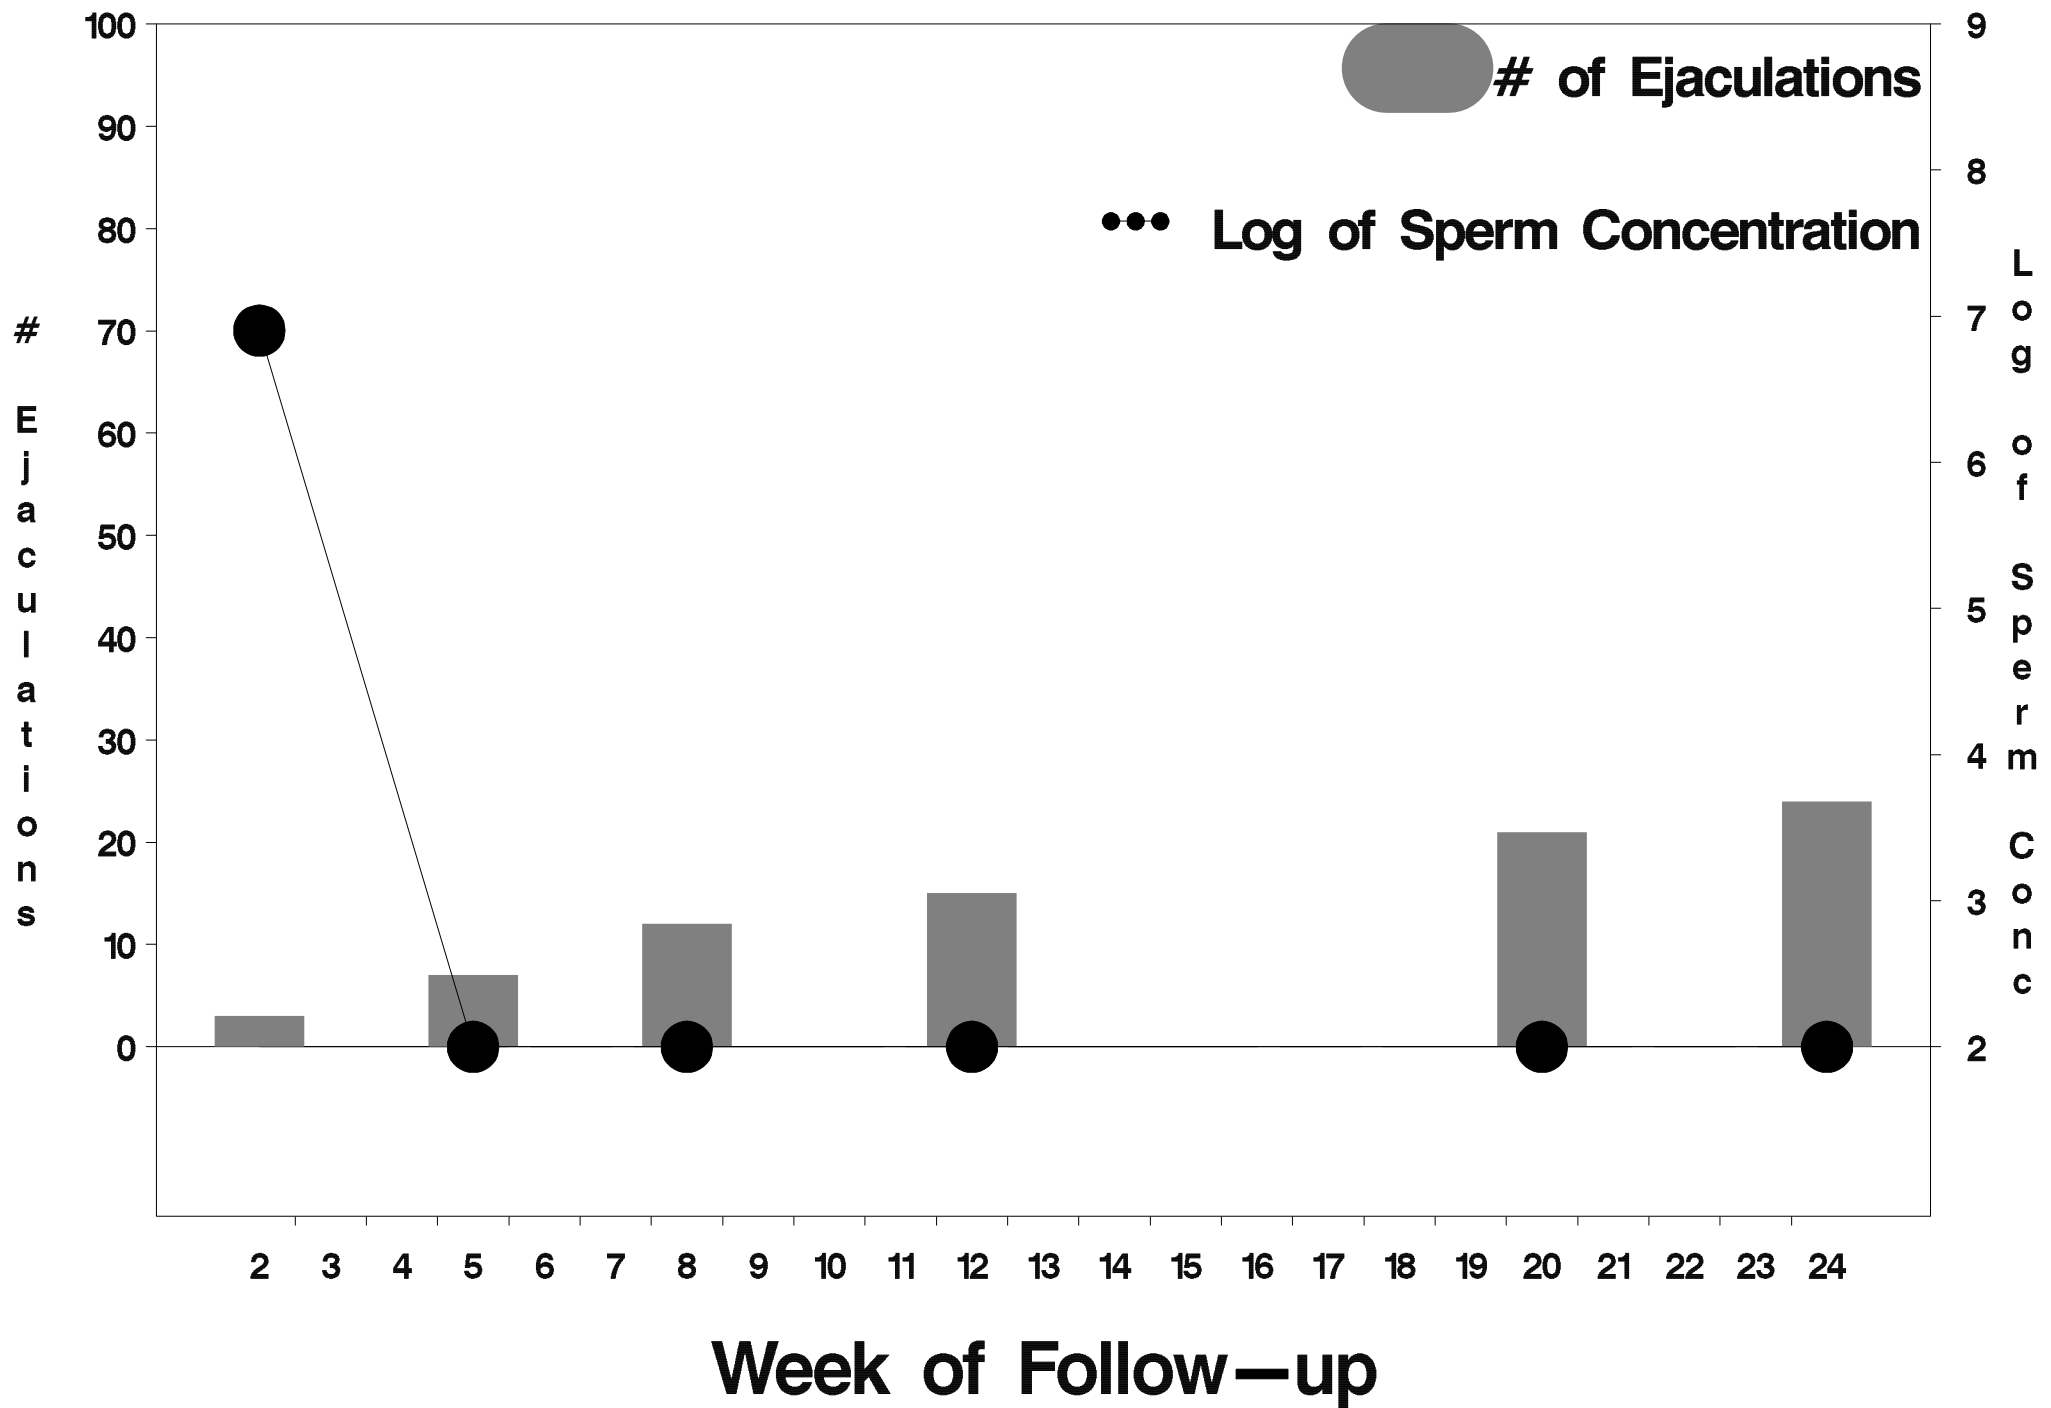



# Participant number= 515

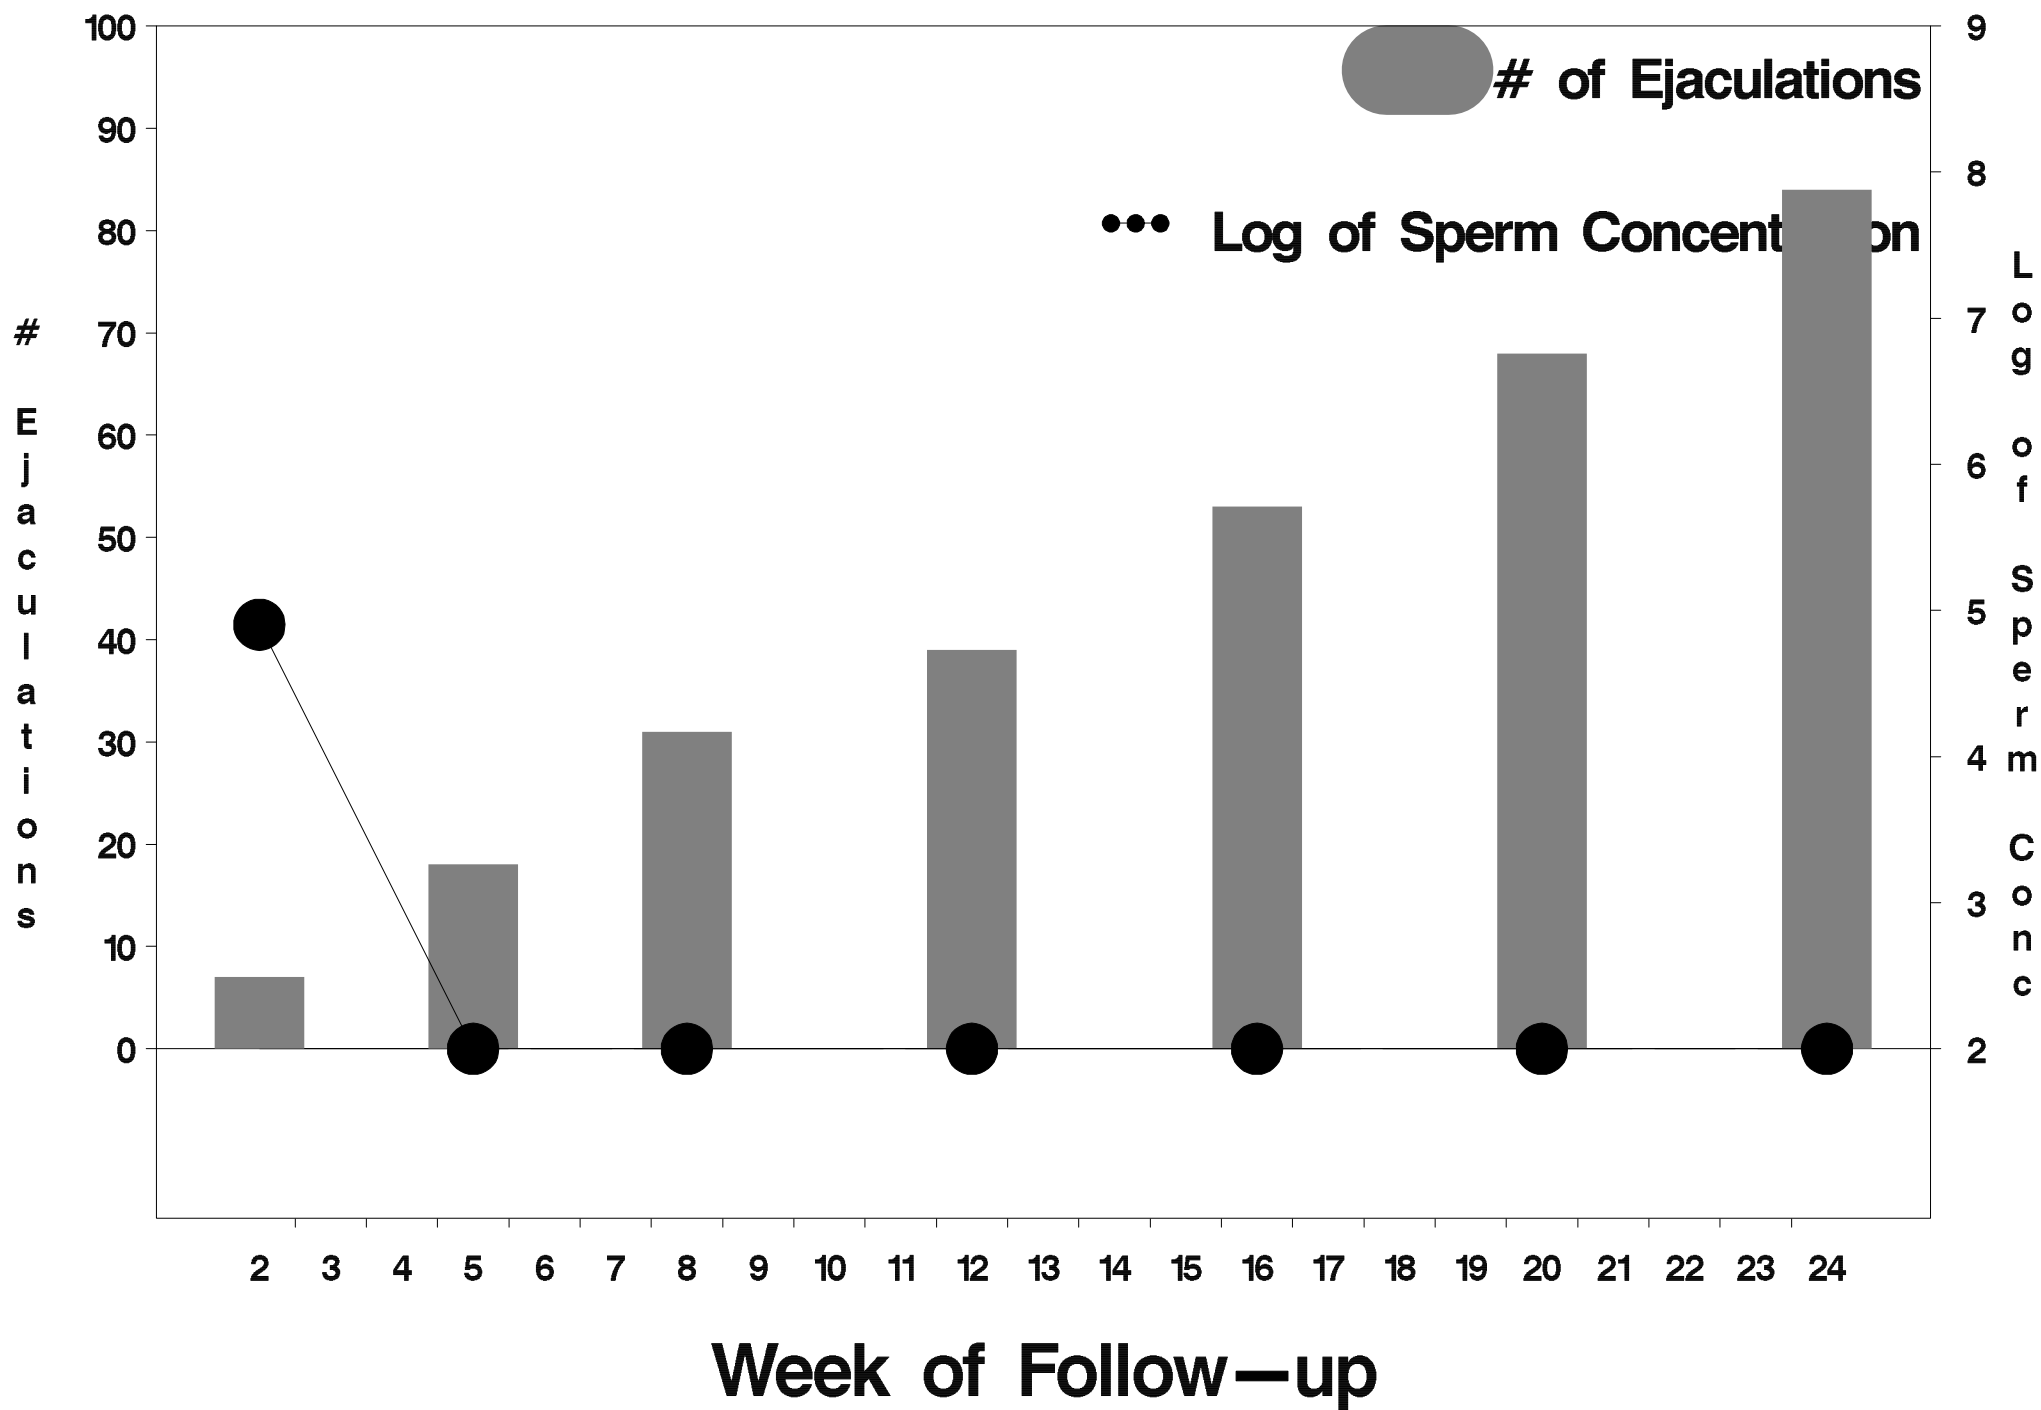

# Participant number= 516

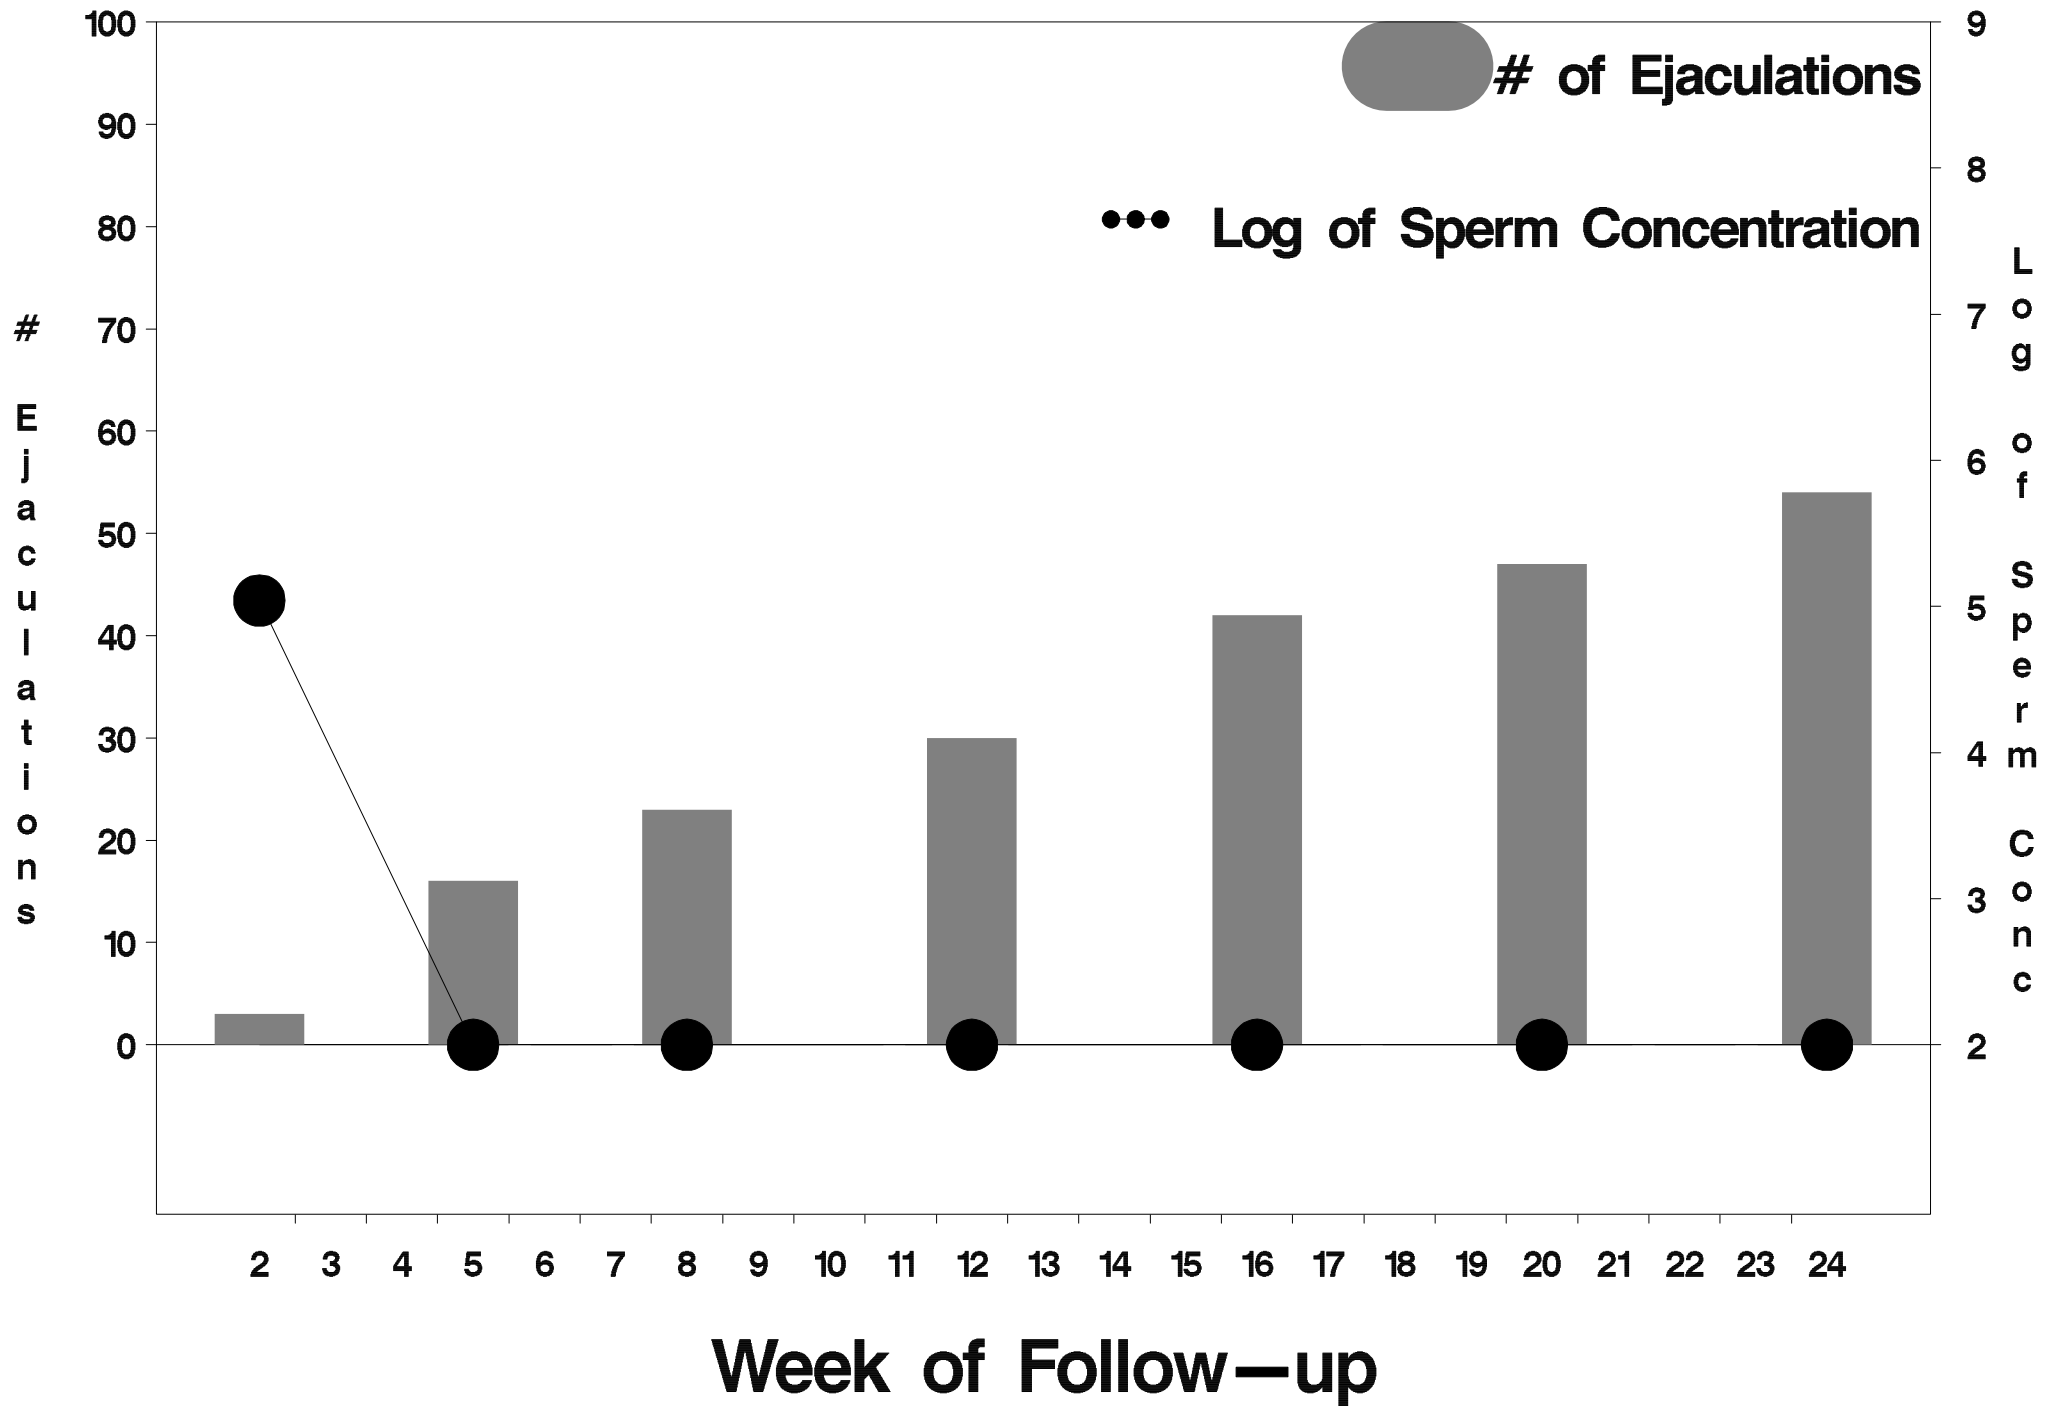

# Participant number= 517

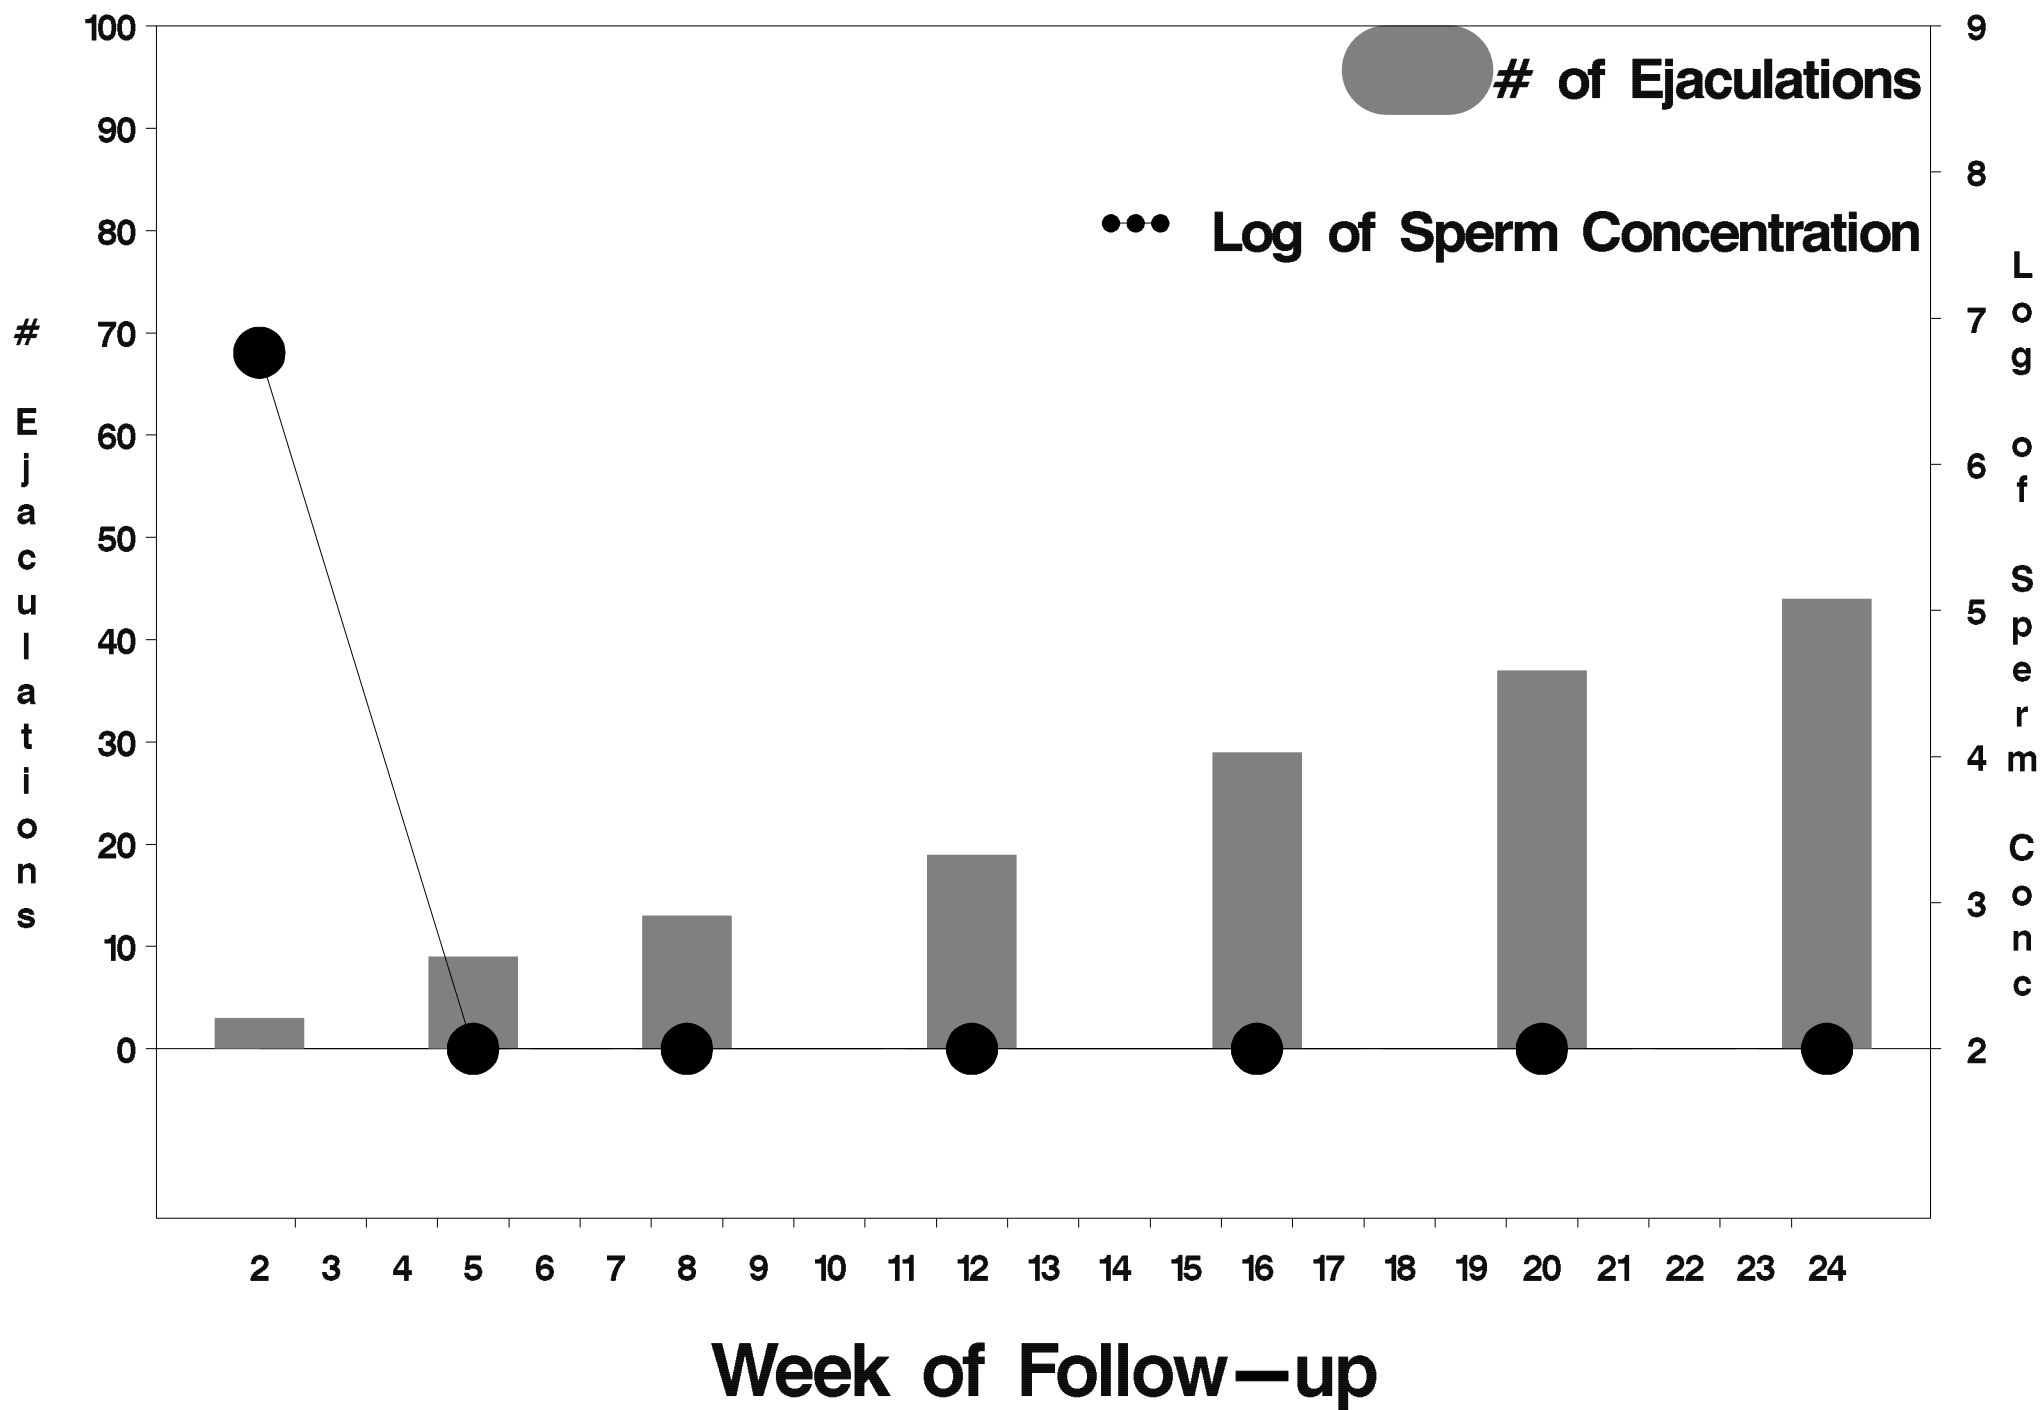

# Participant number= 518

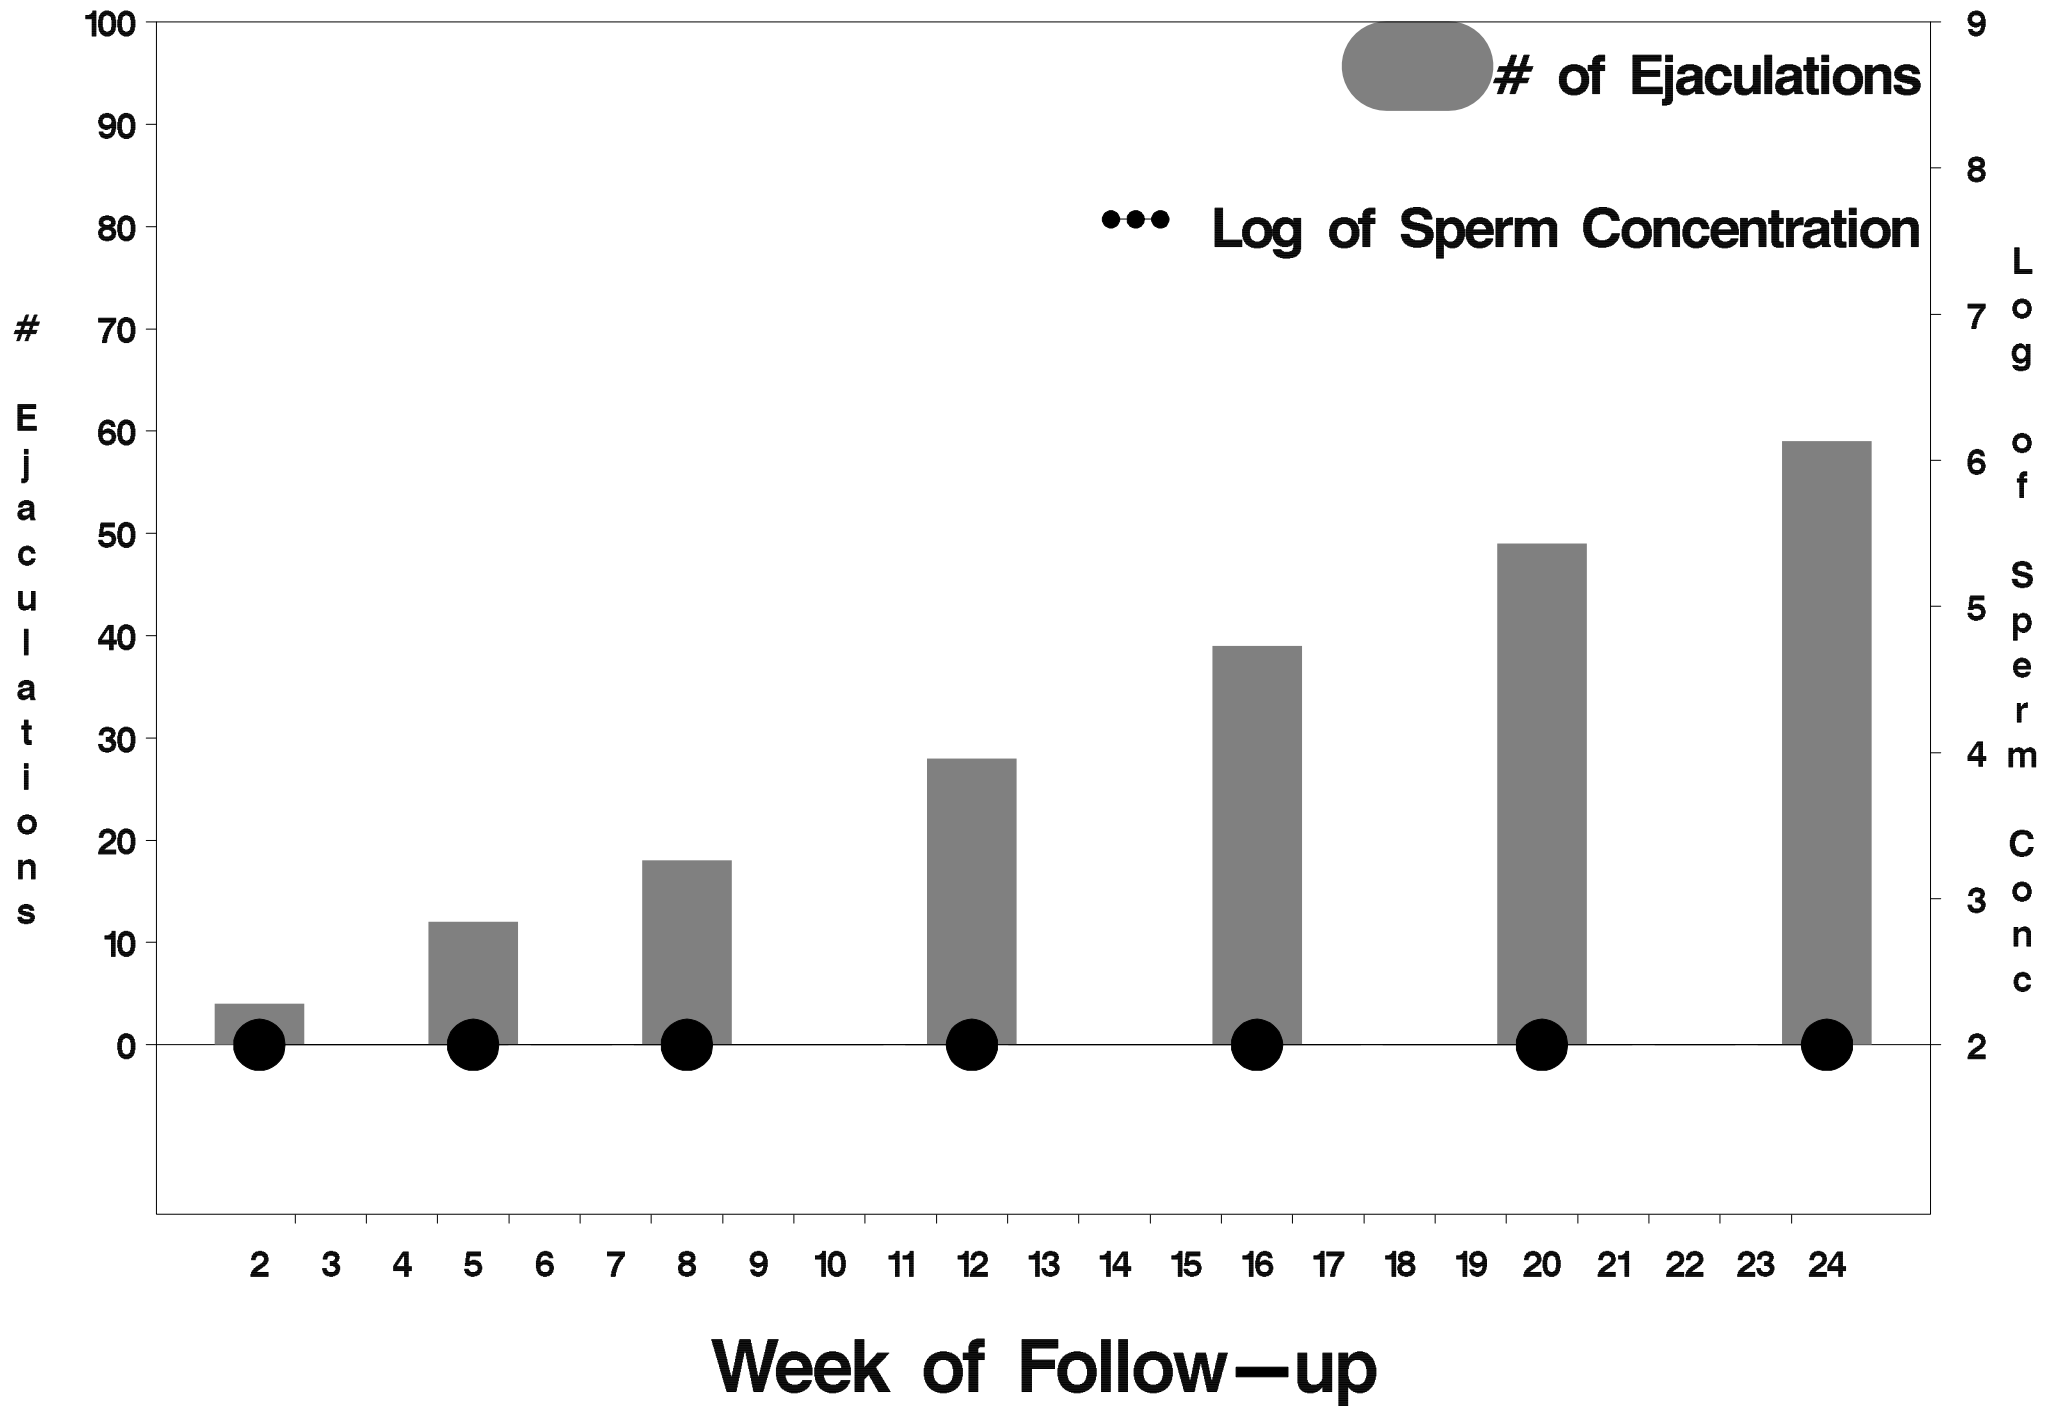



# Participant number= 519

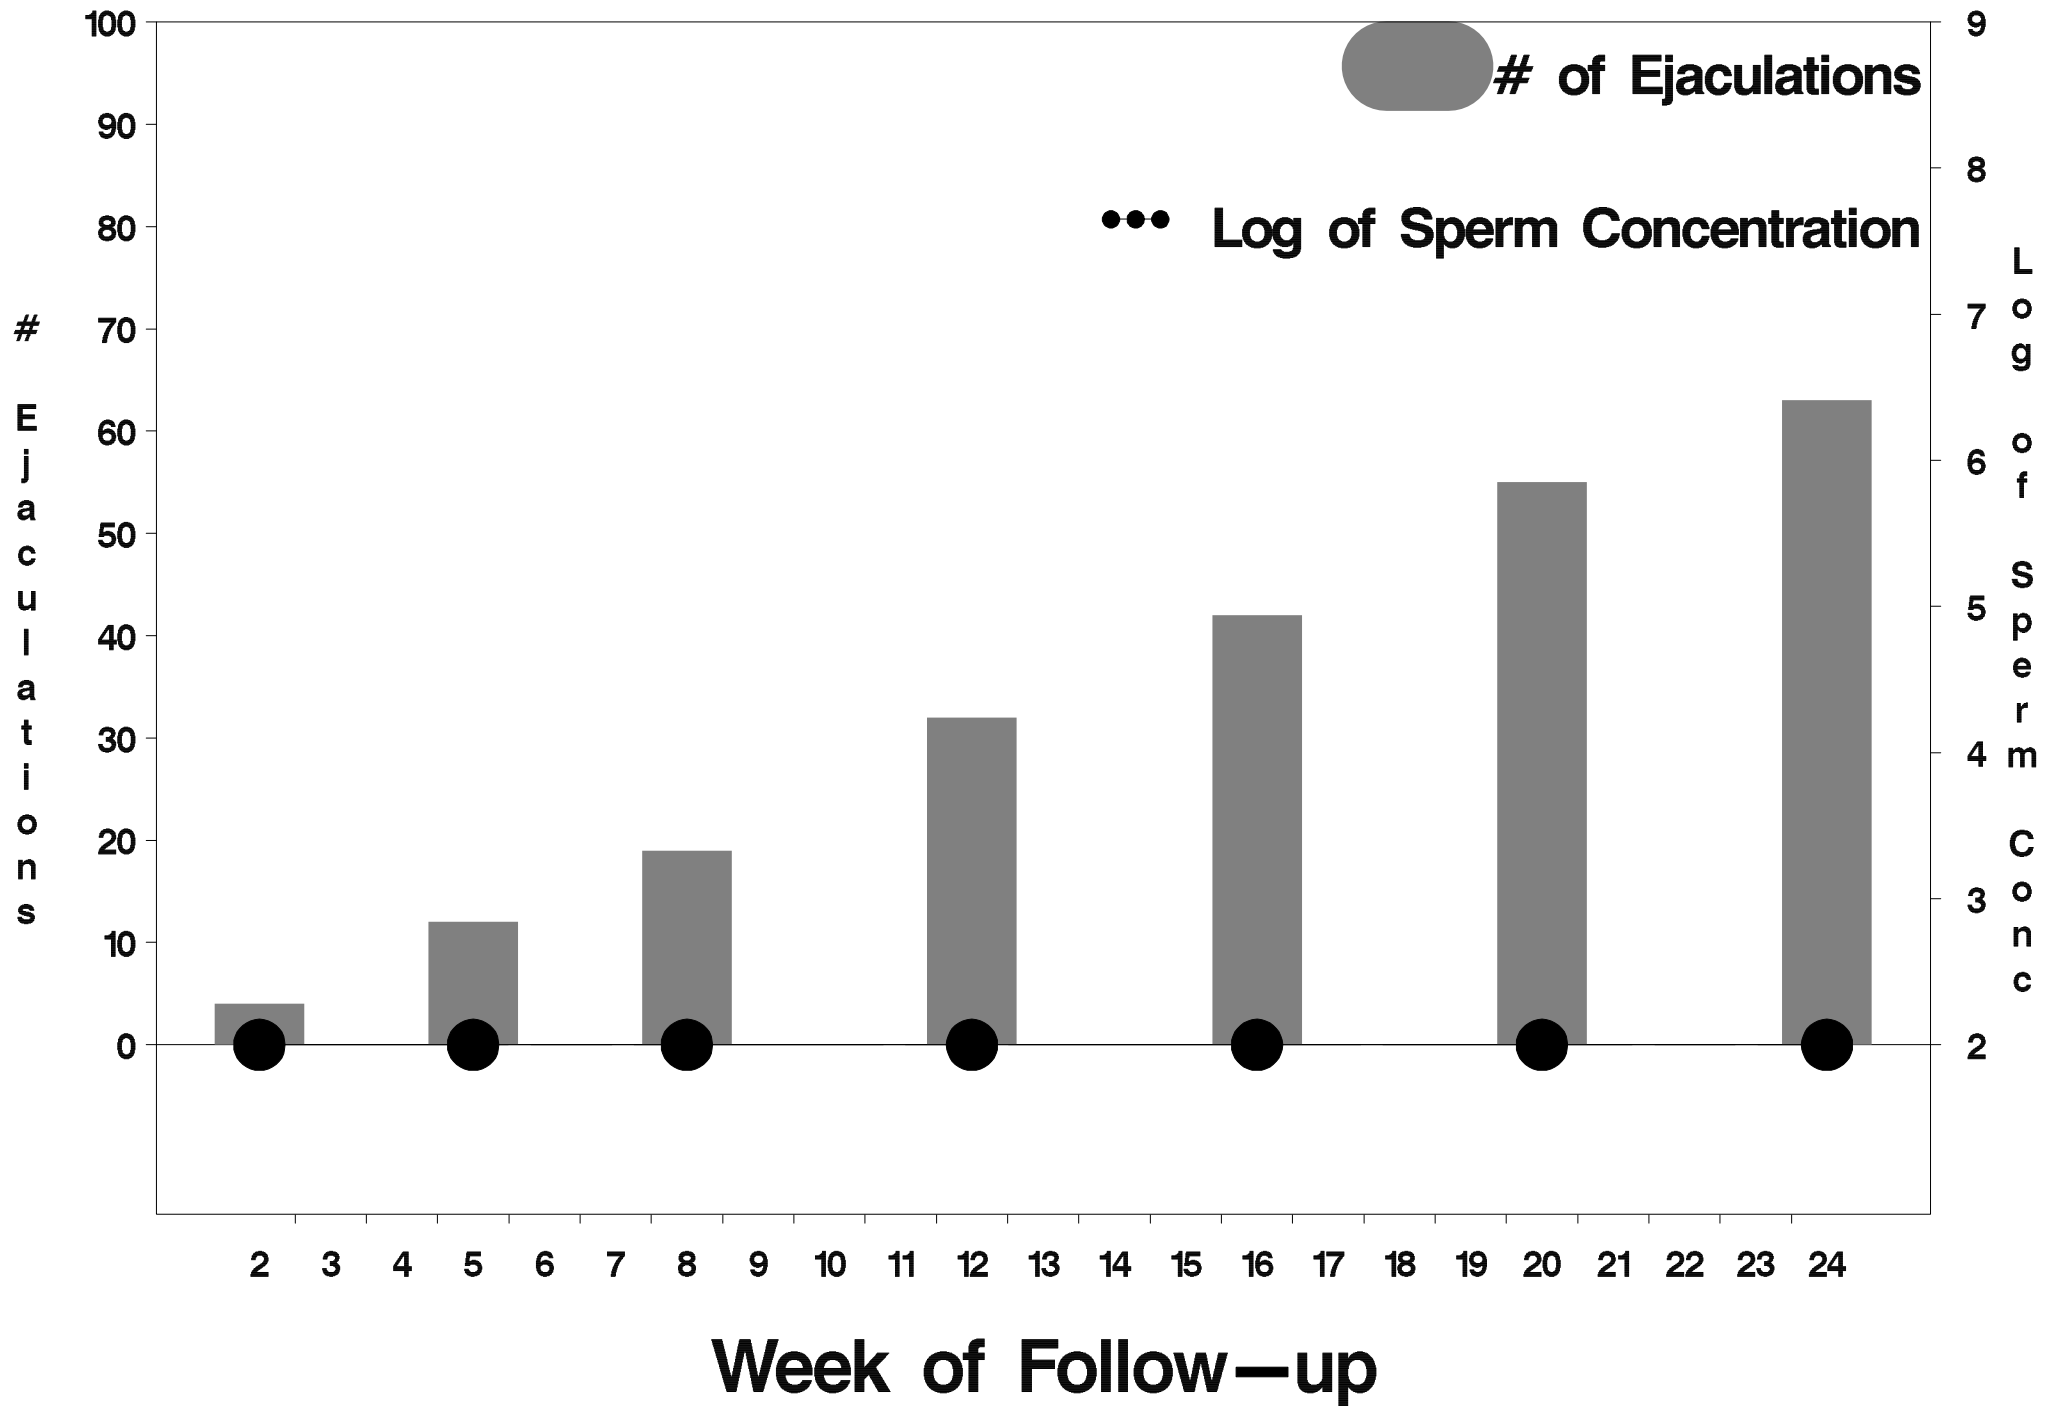

# Participant number= 520

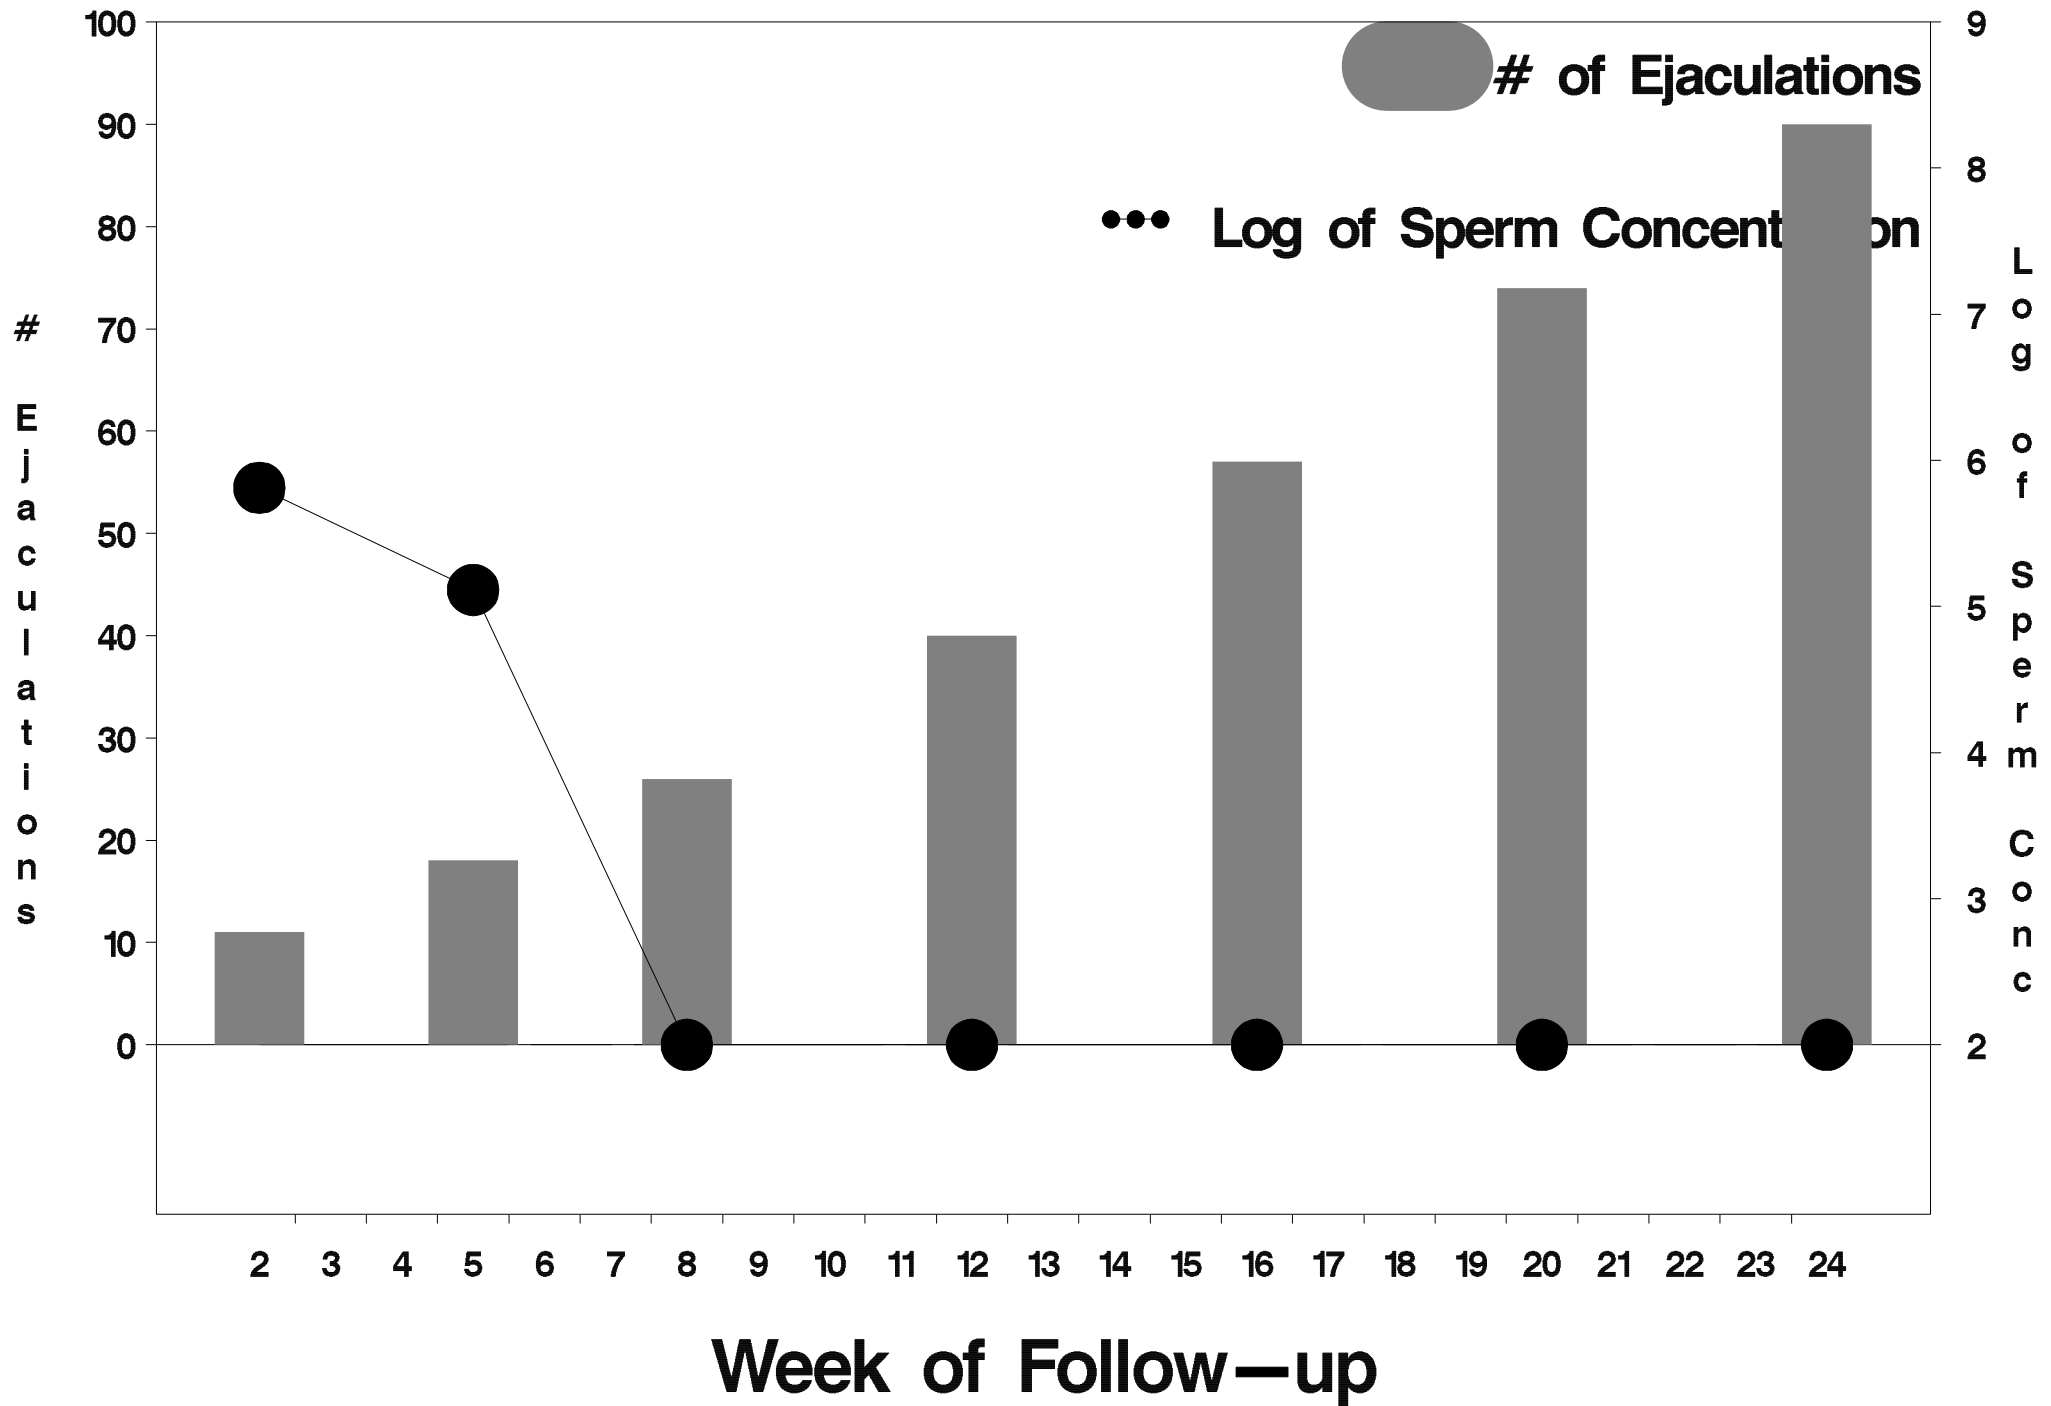

# Participant number= 521

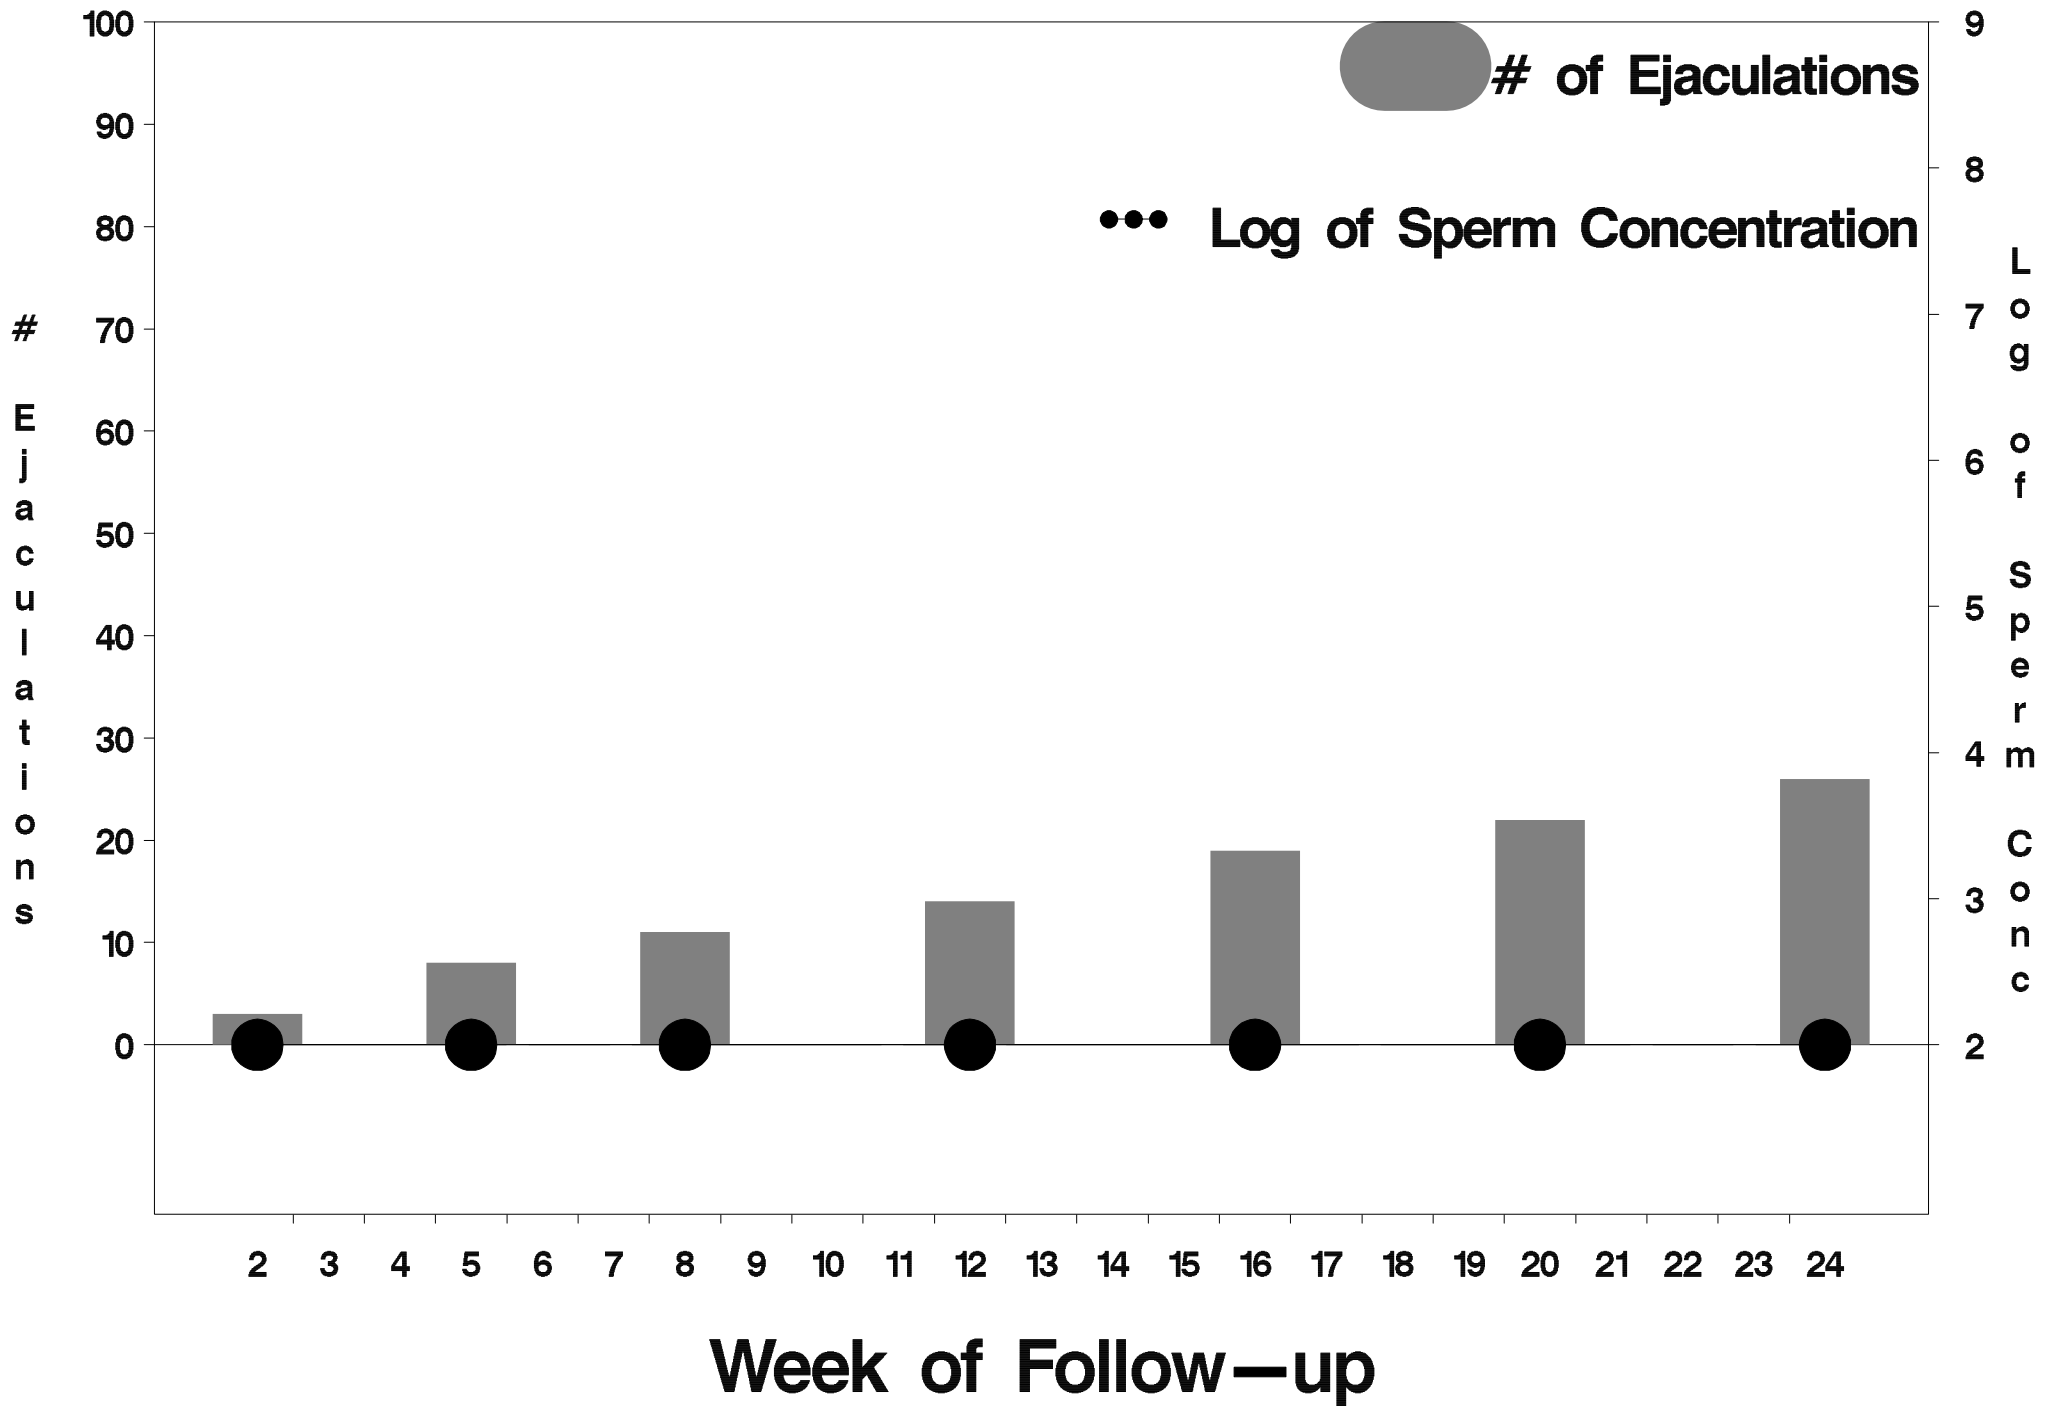

# Participant number= 522

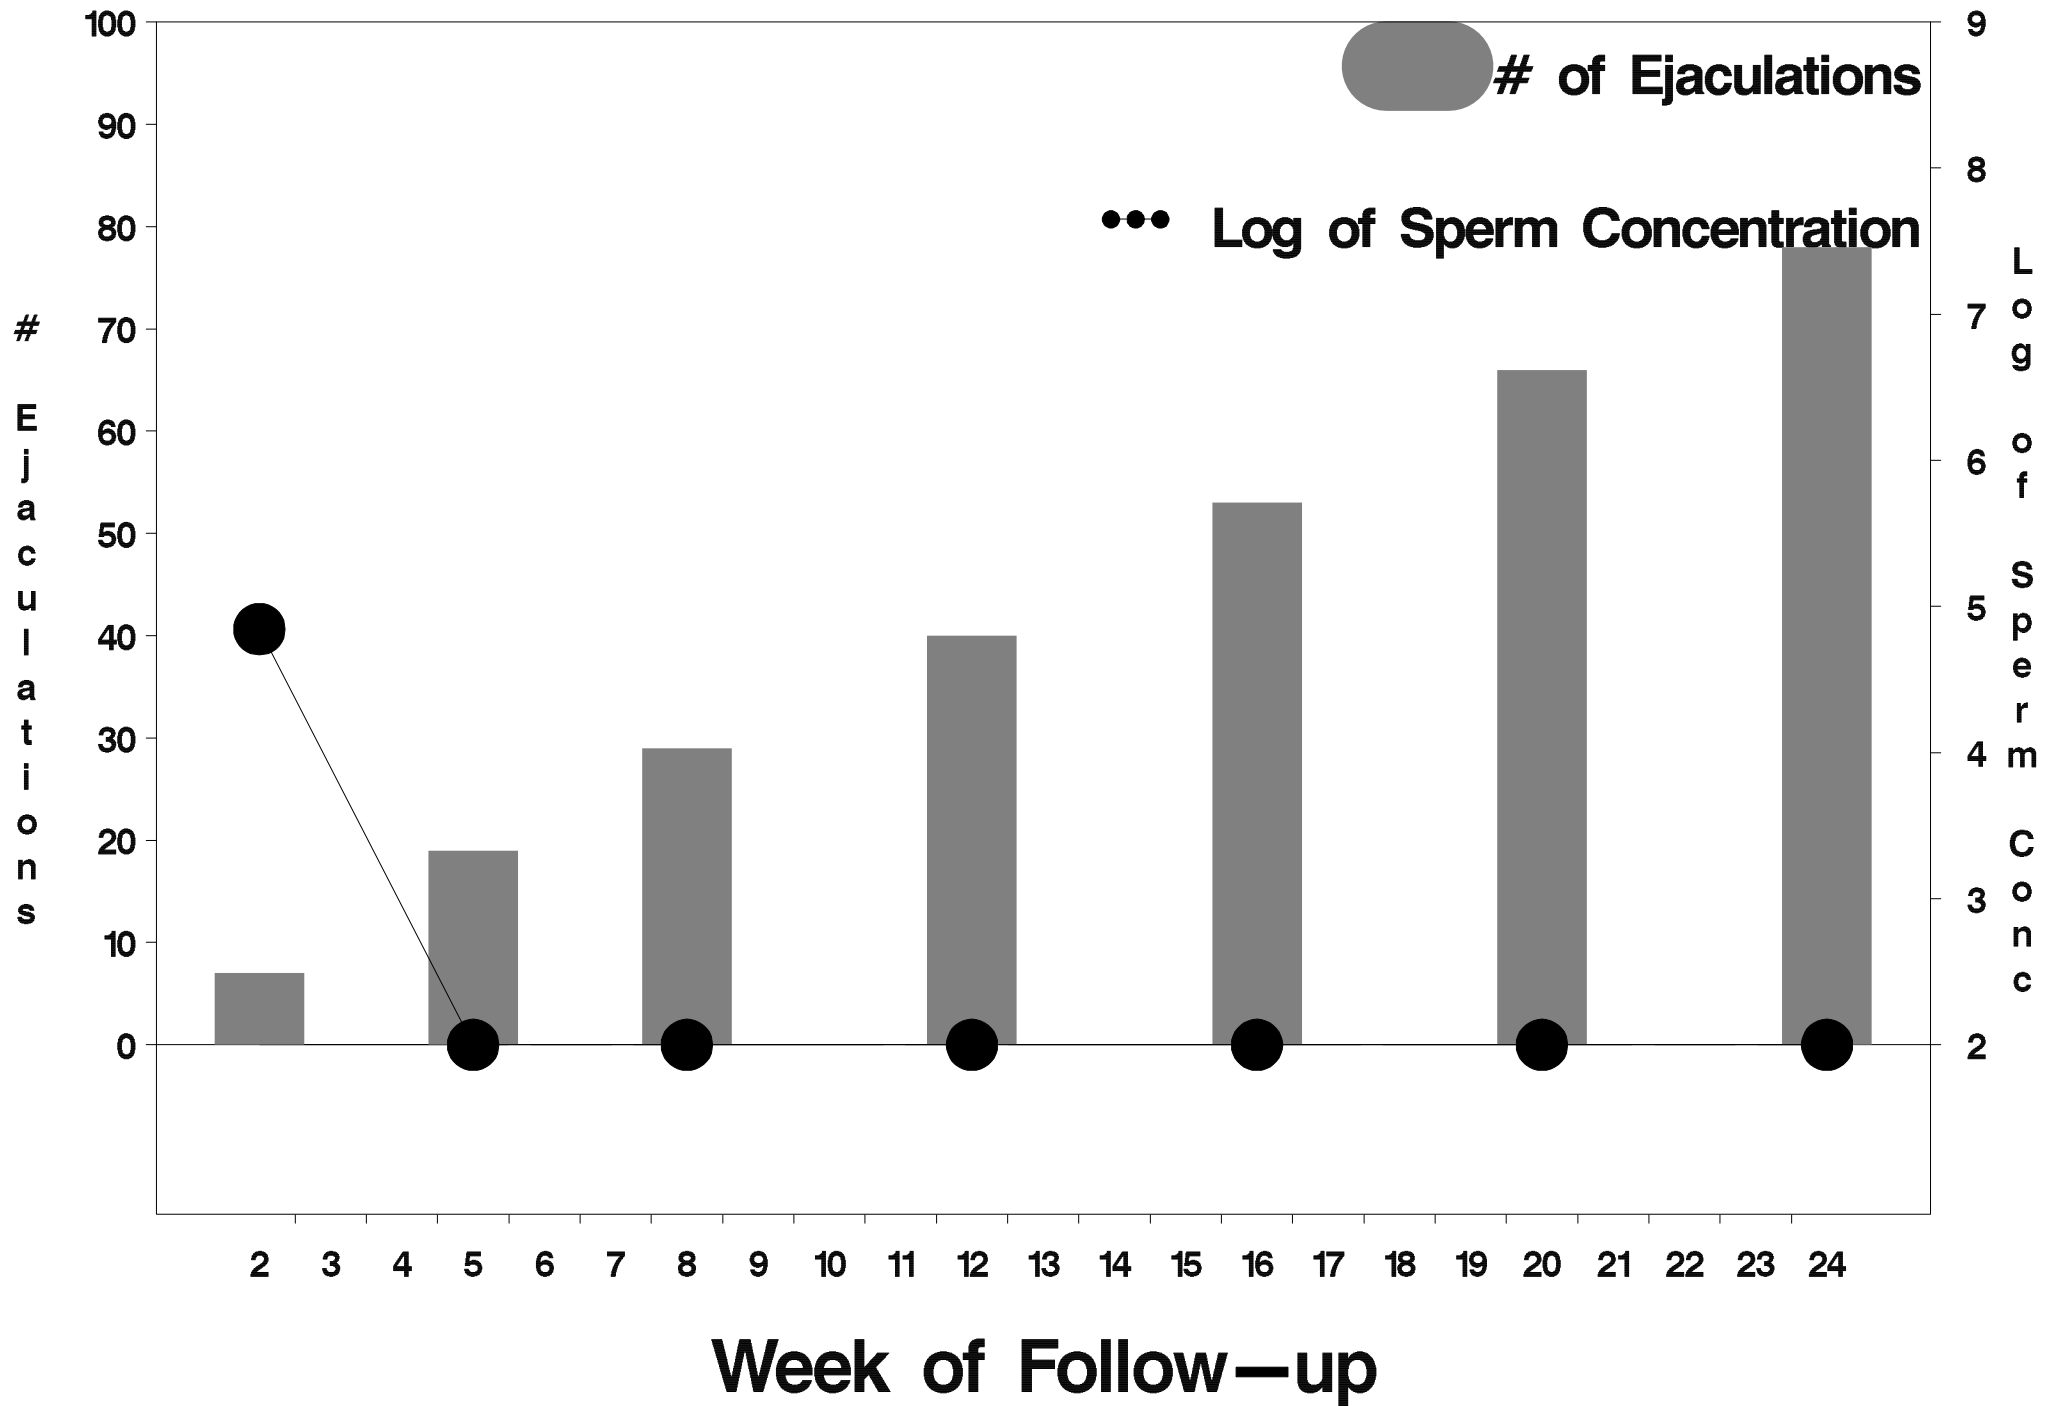

# Participant number= 523

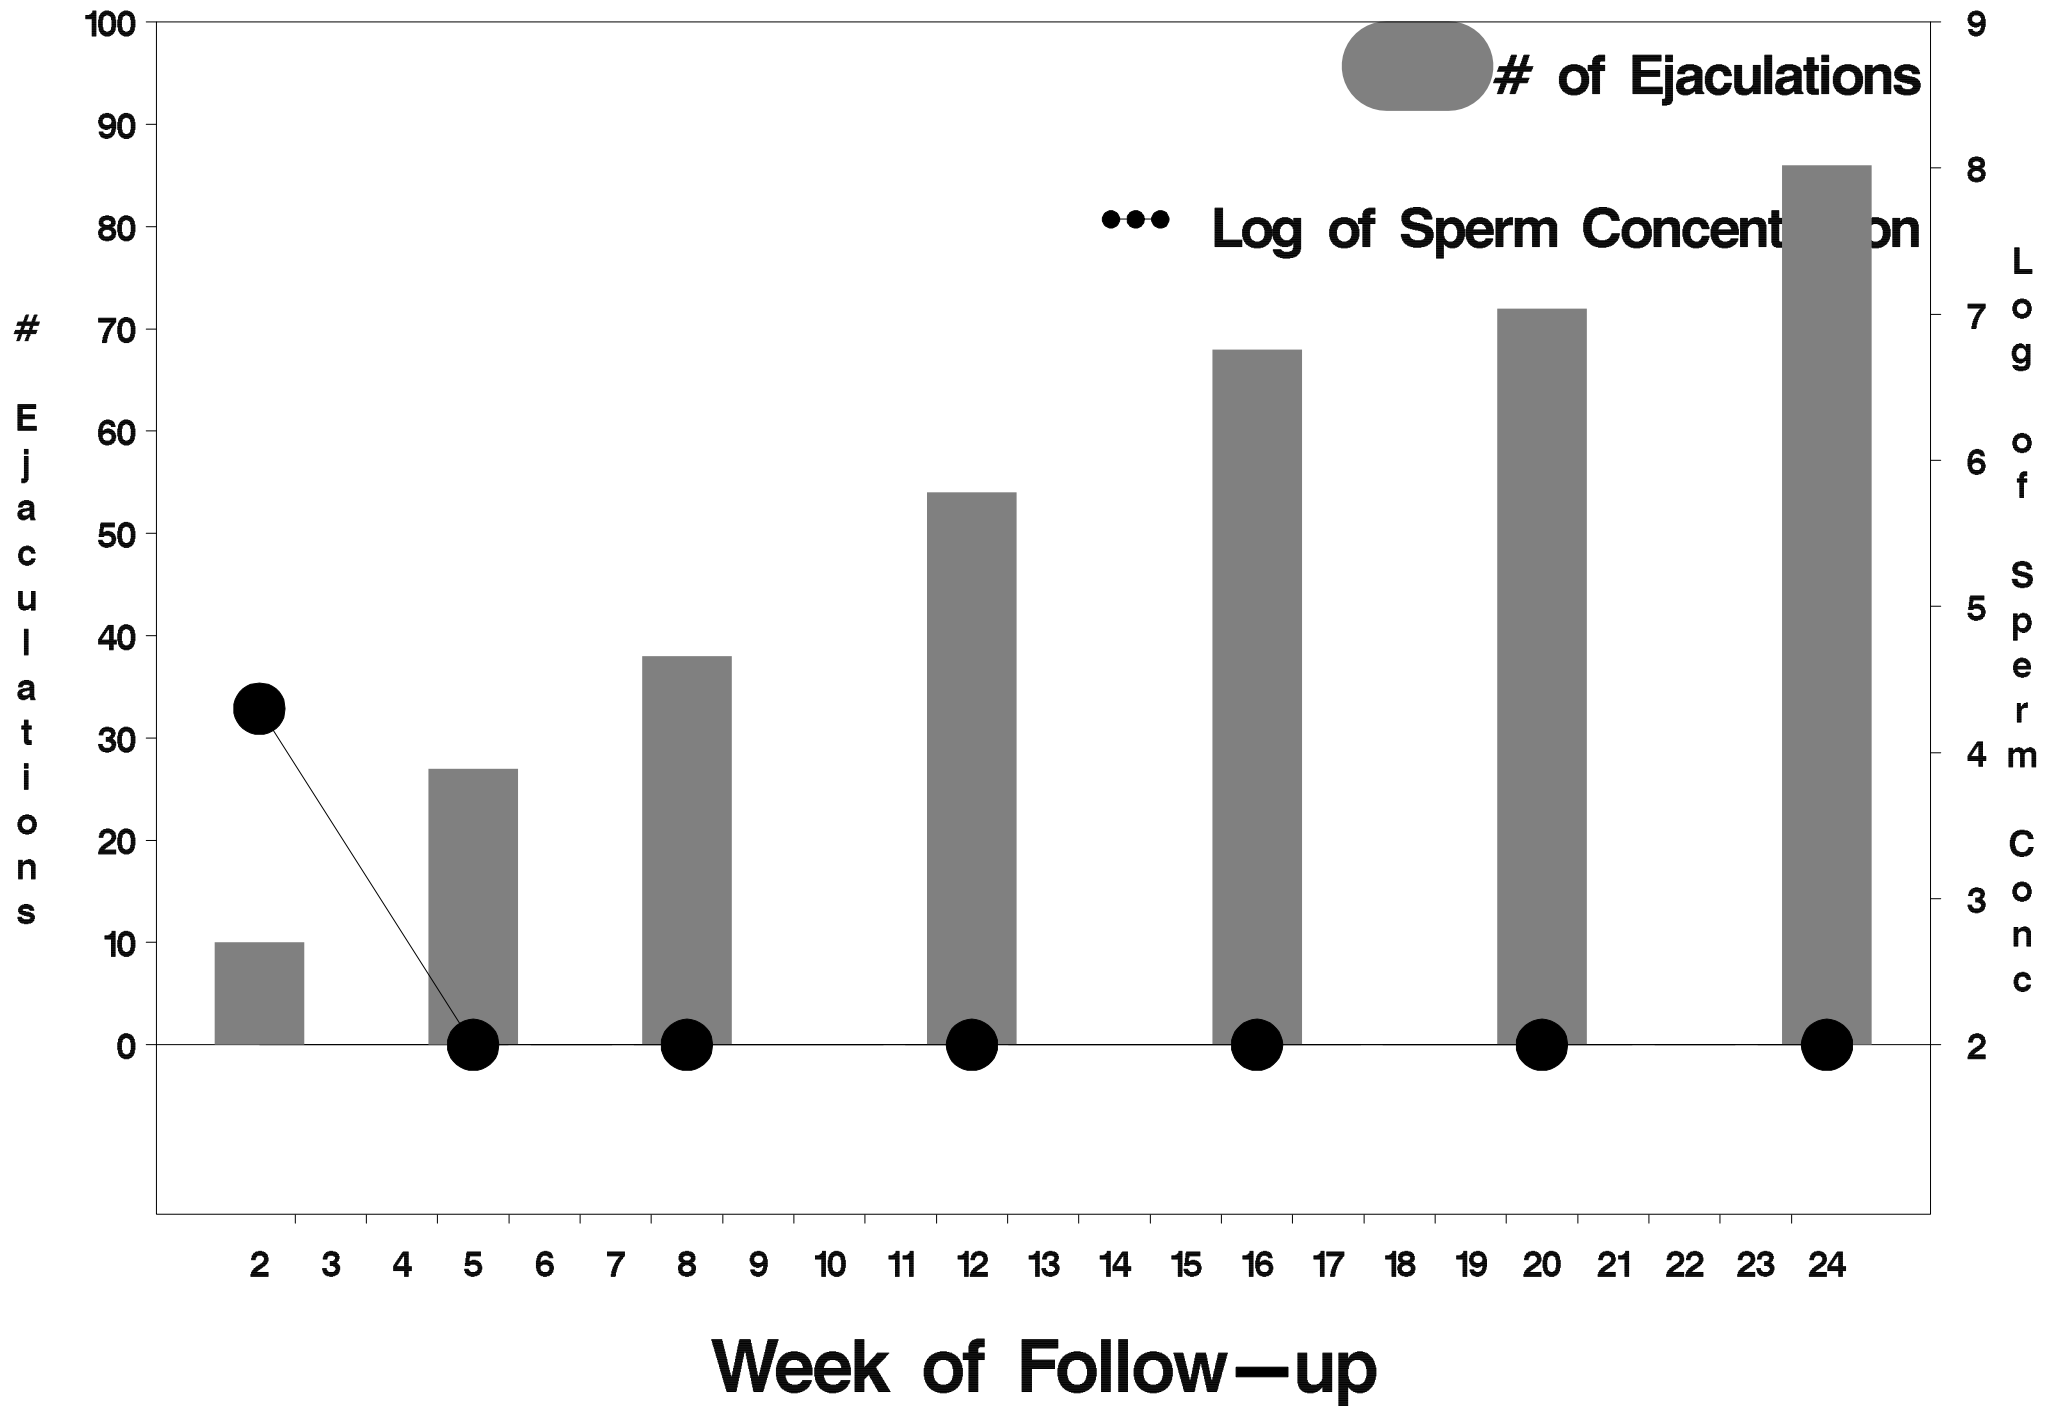

# Participant number= 524

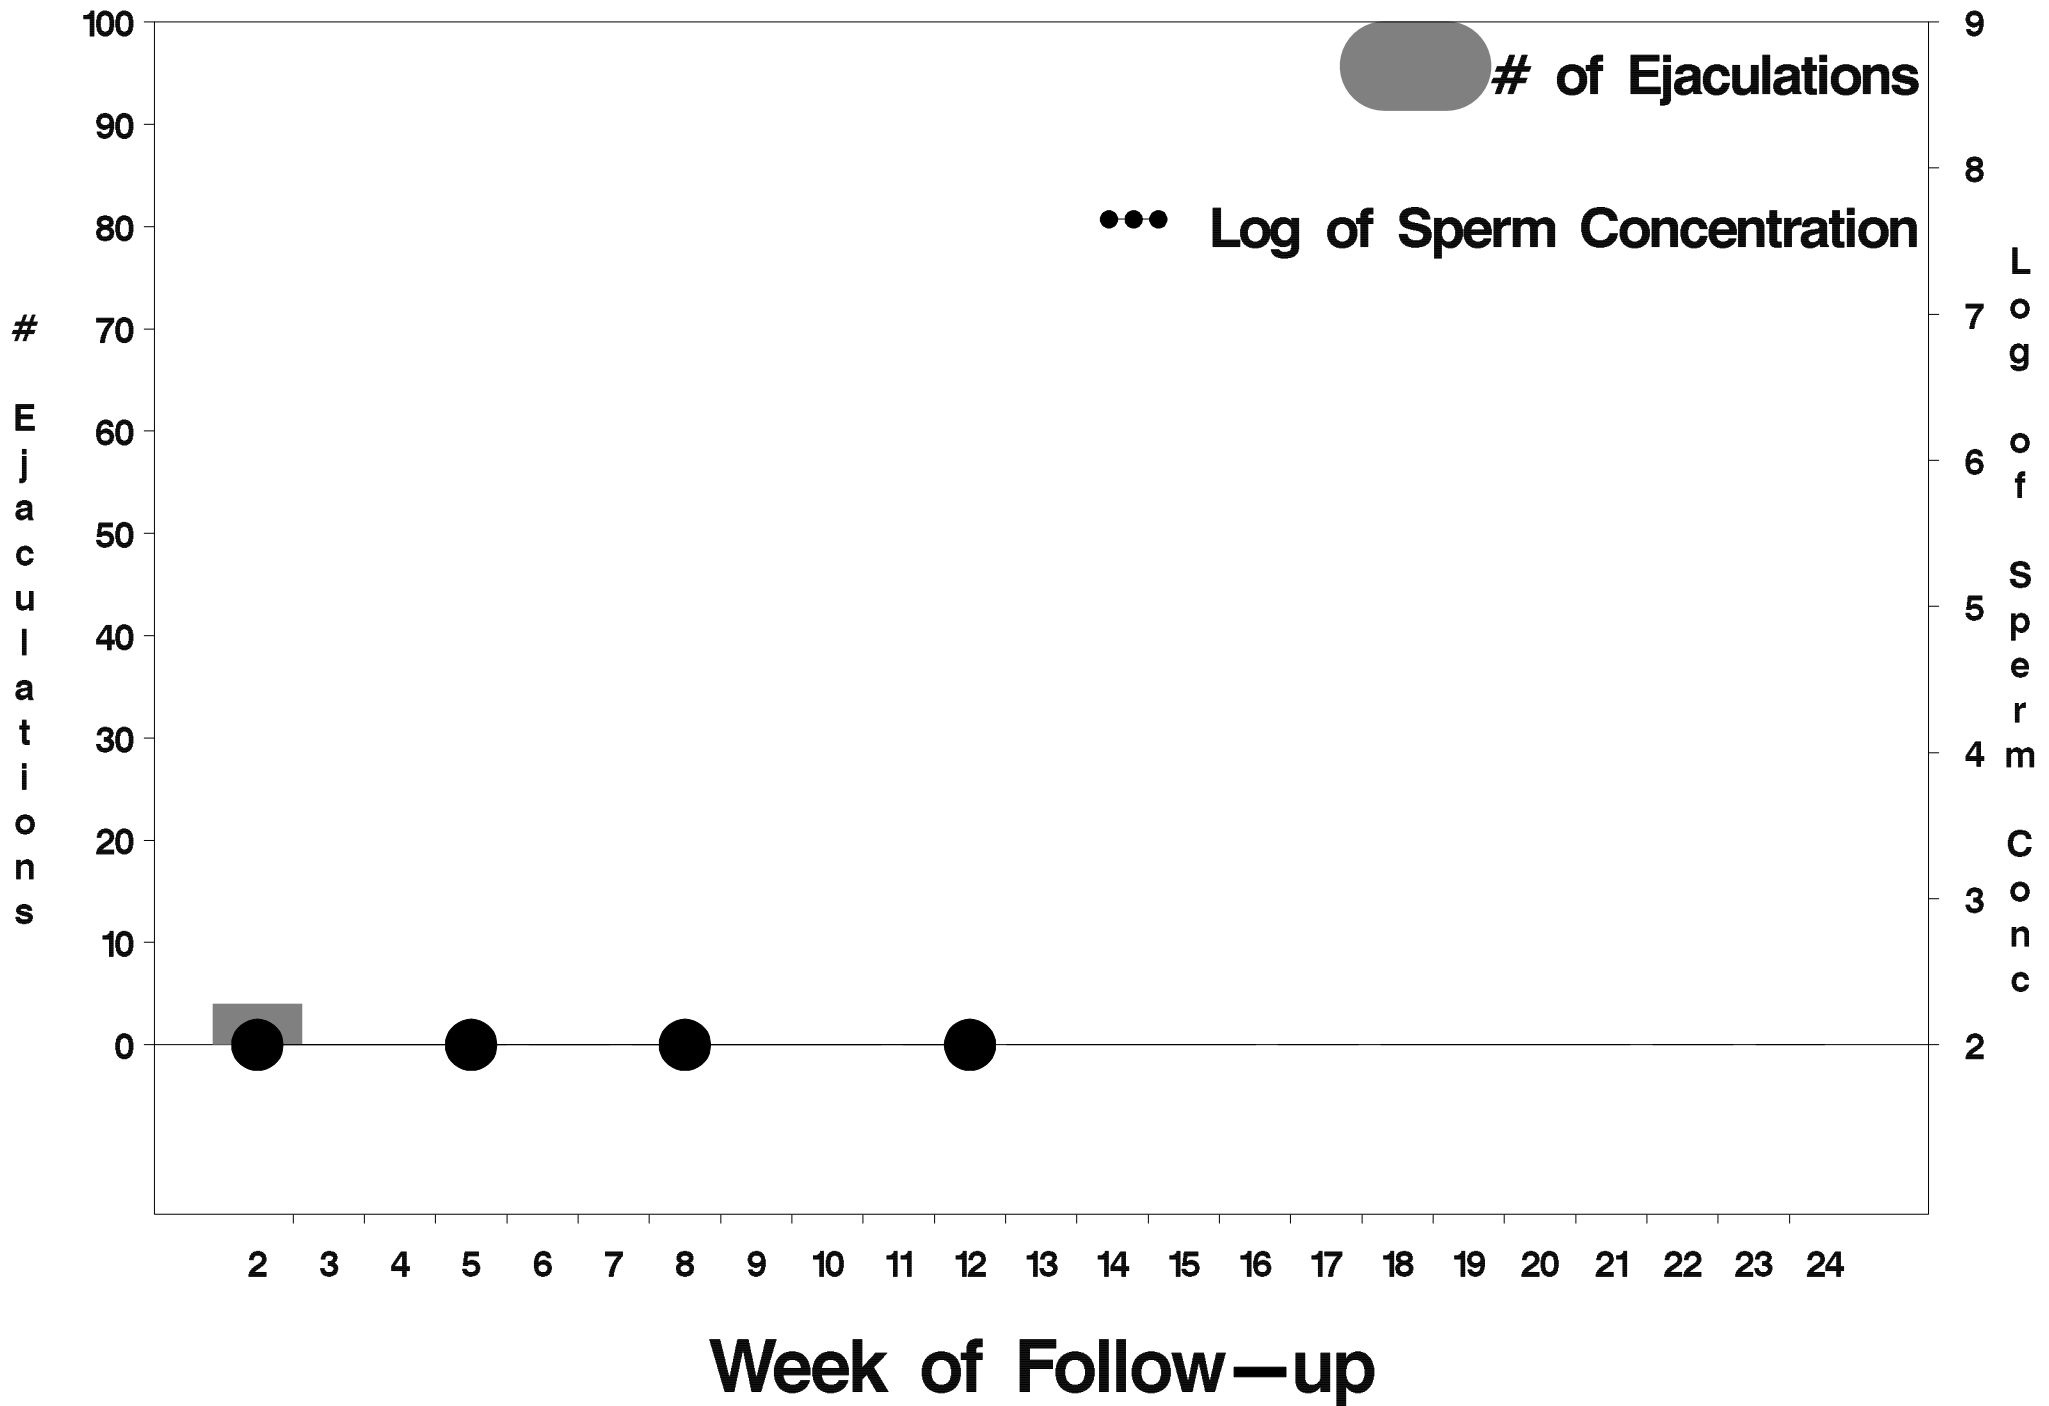

# Participant number= 525

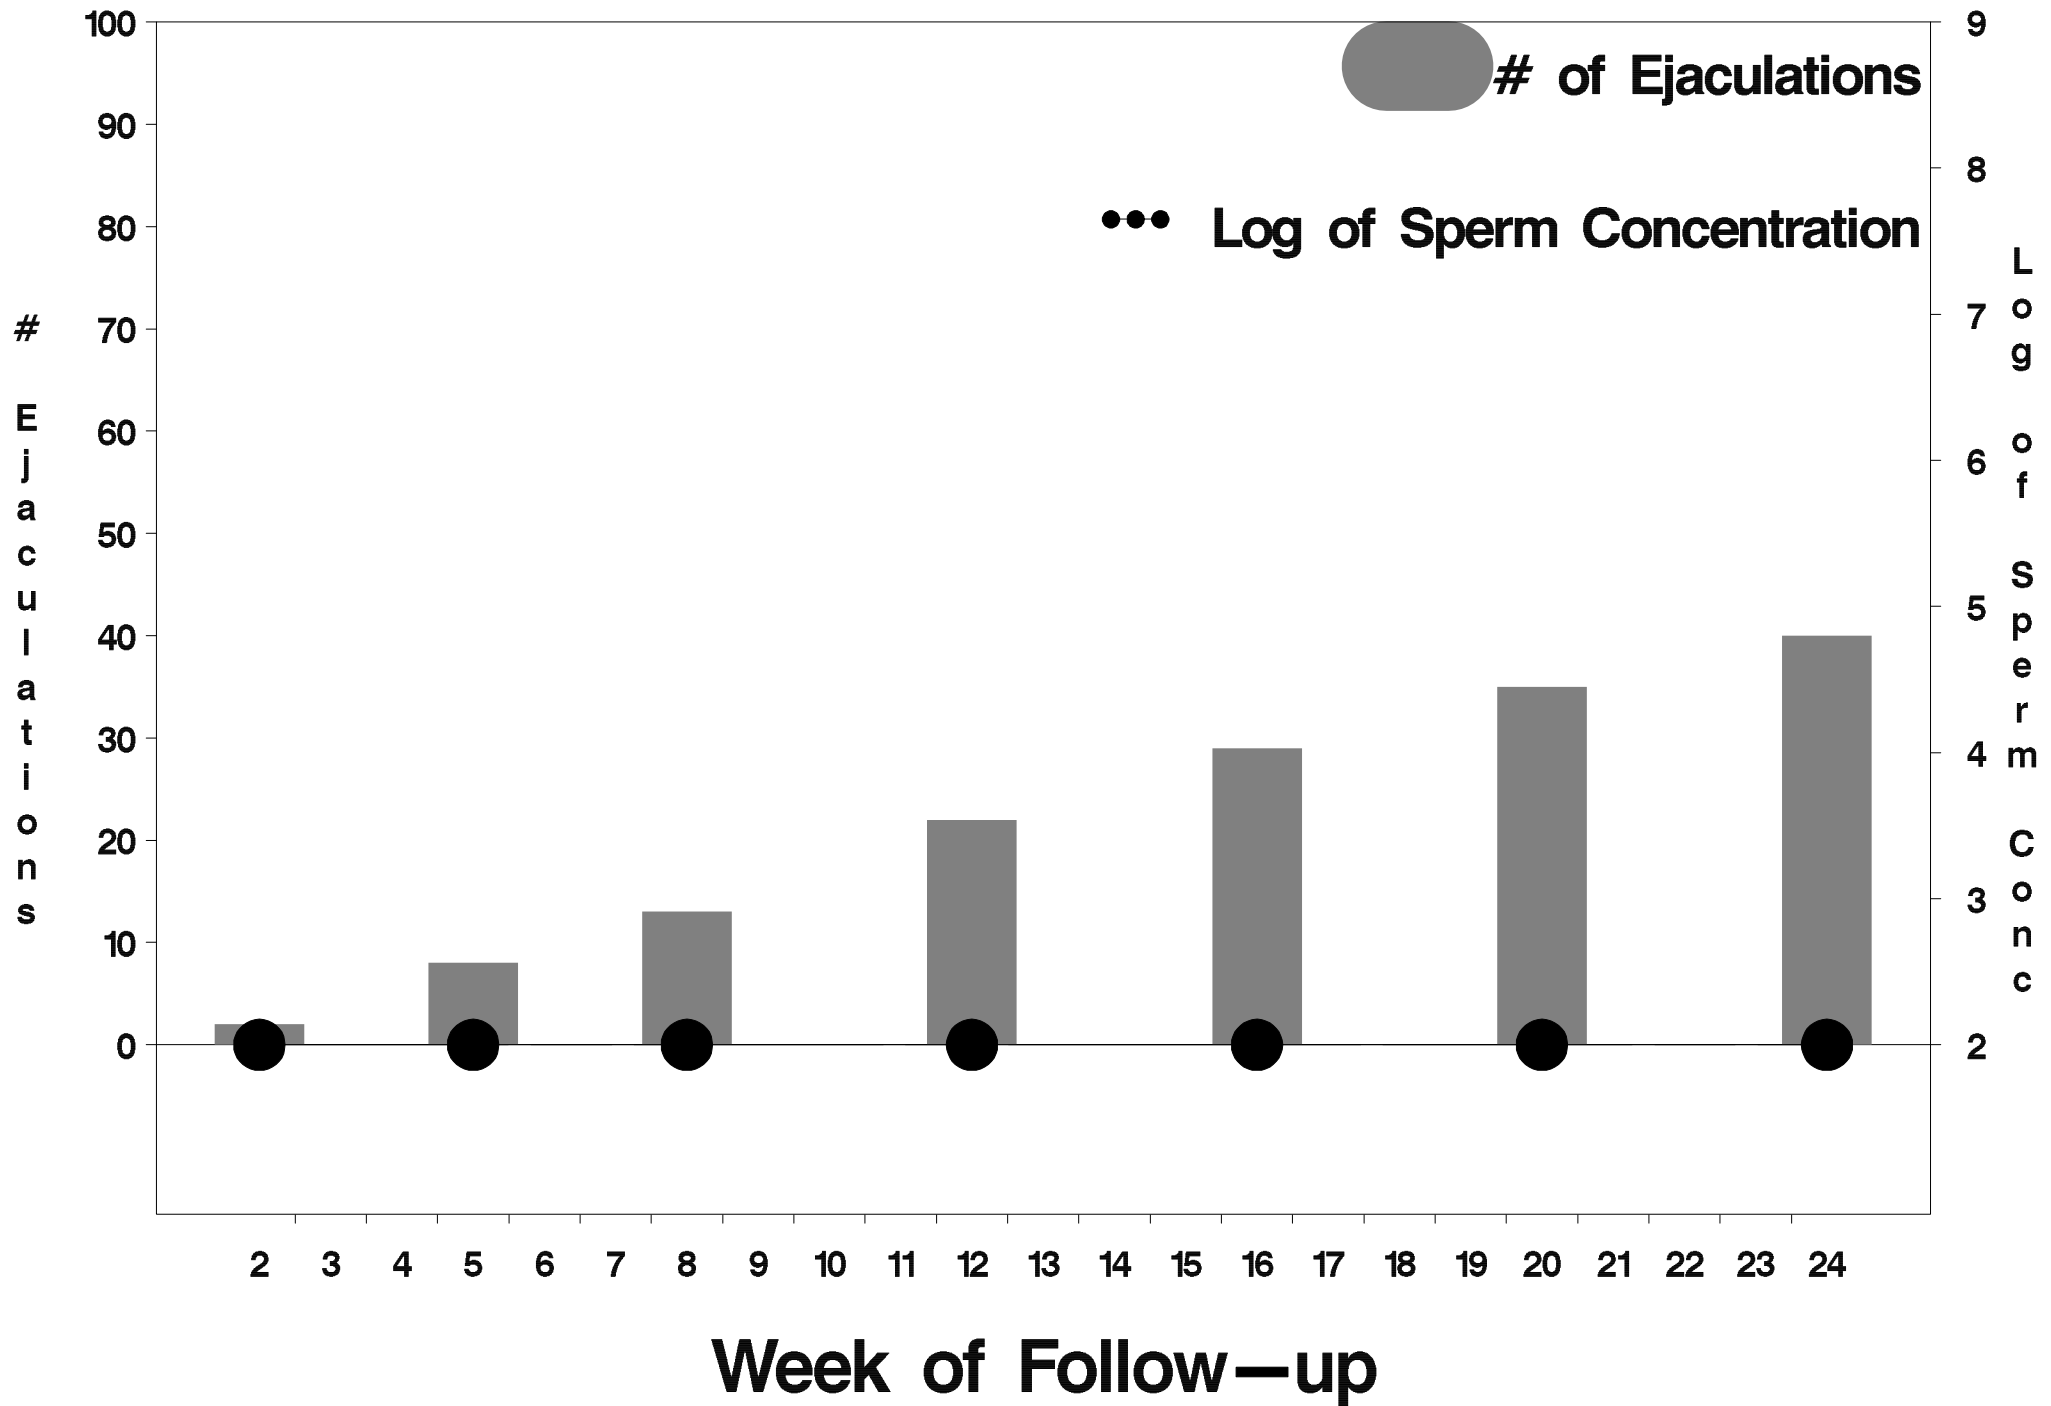

# Participant number= 526

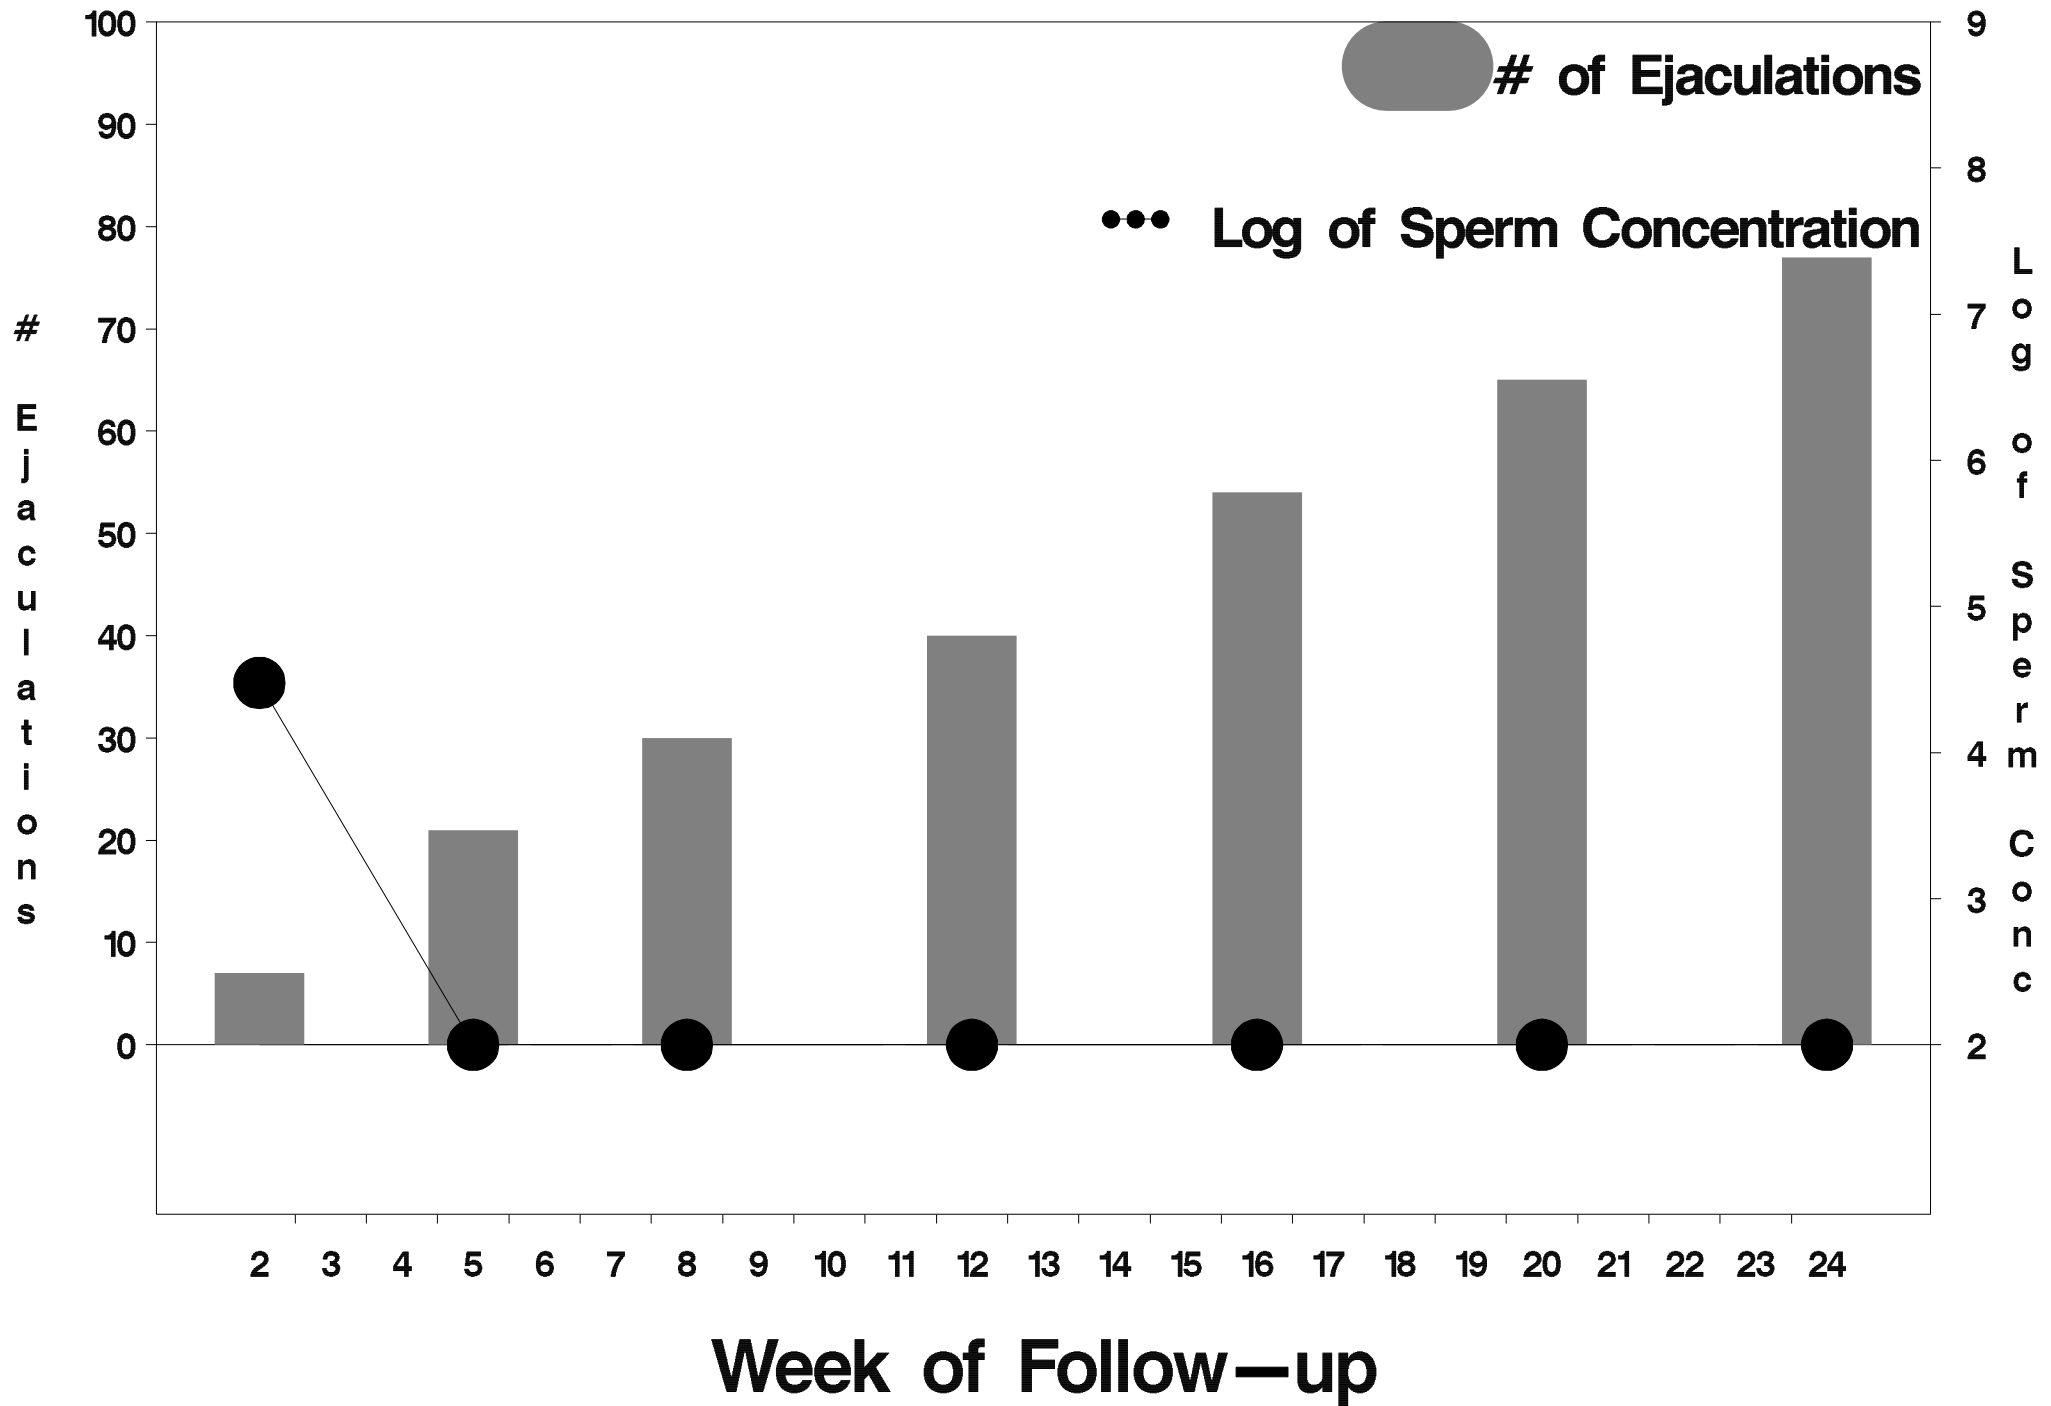



# Participant number= 527

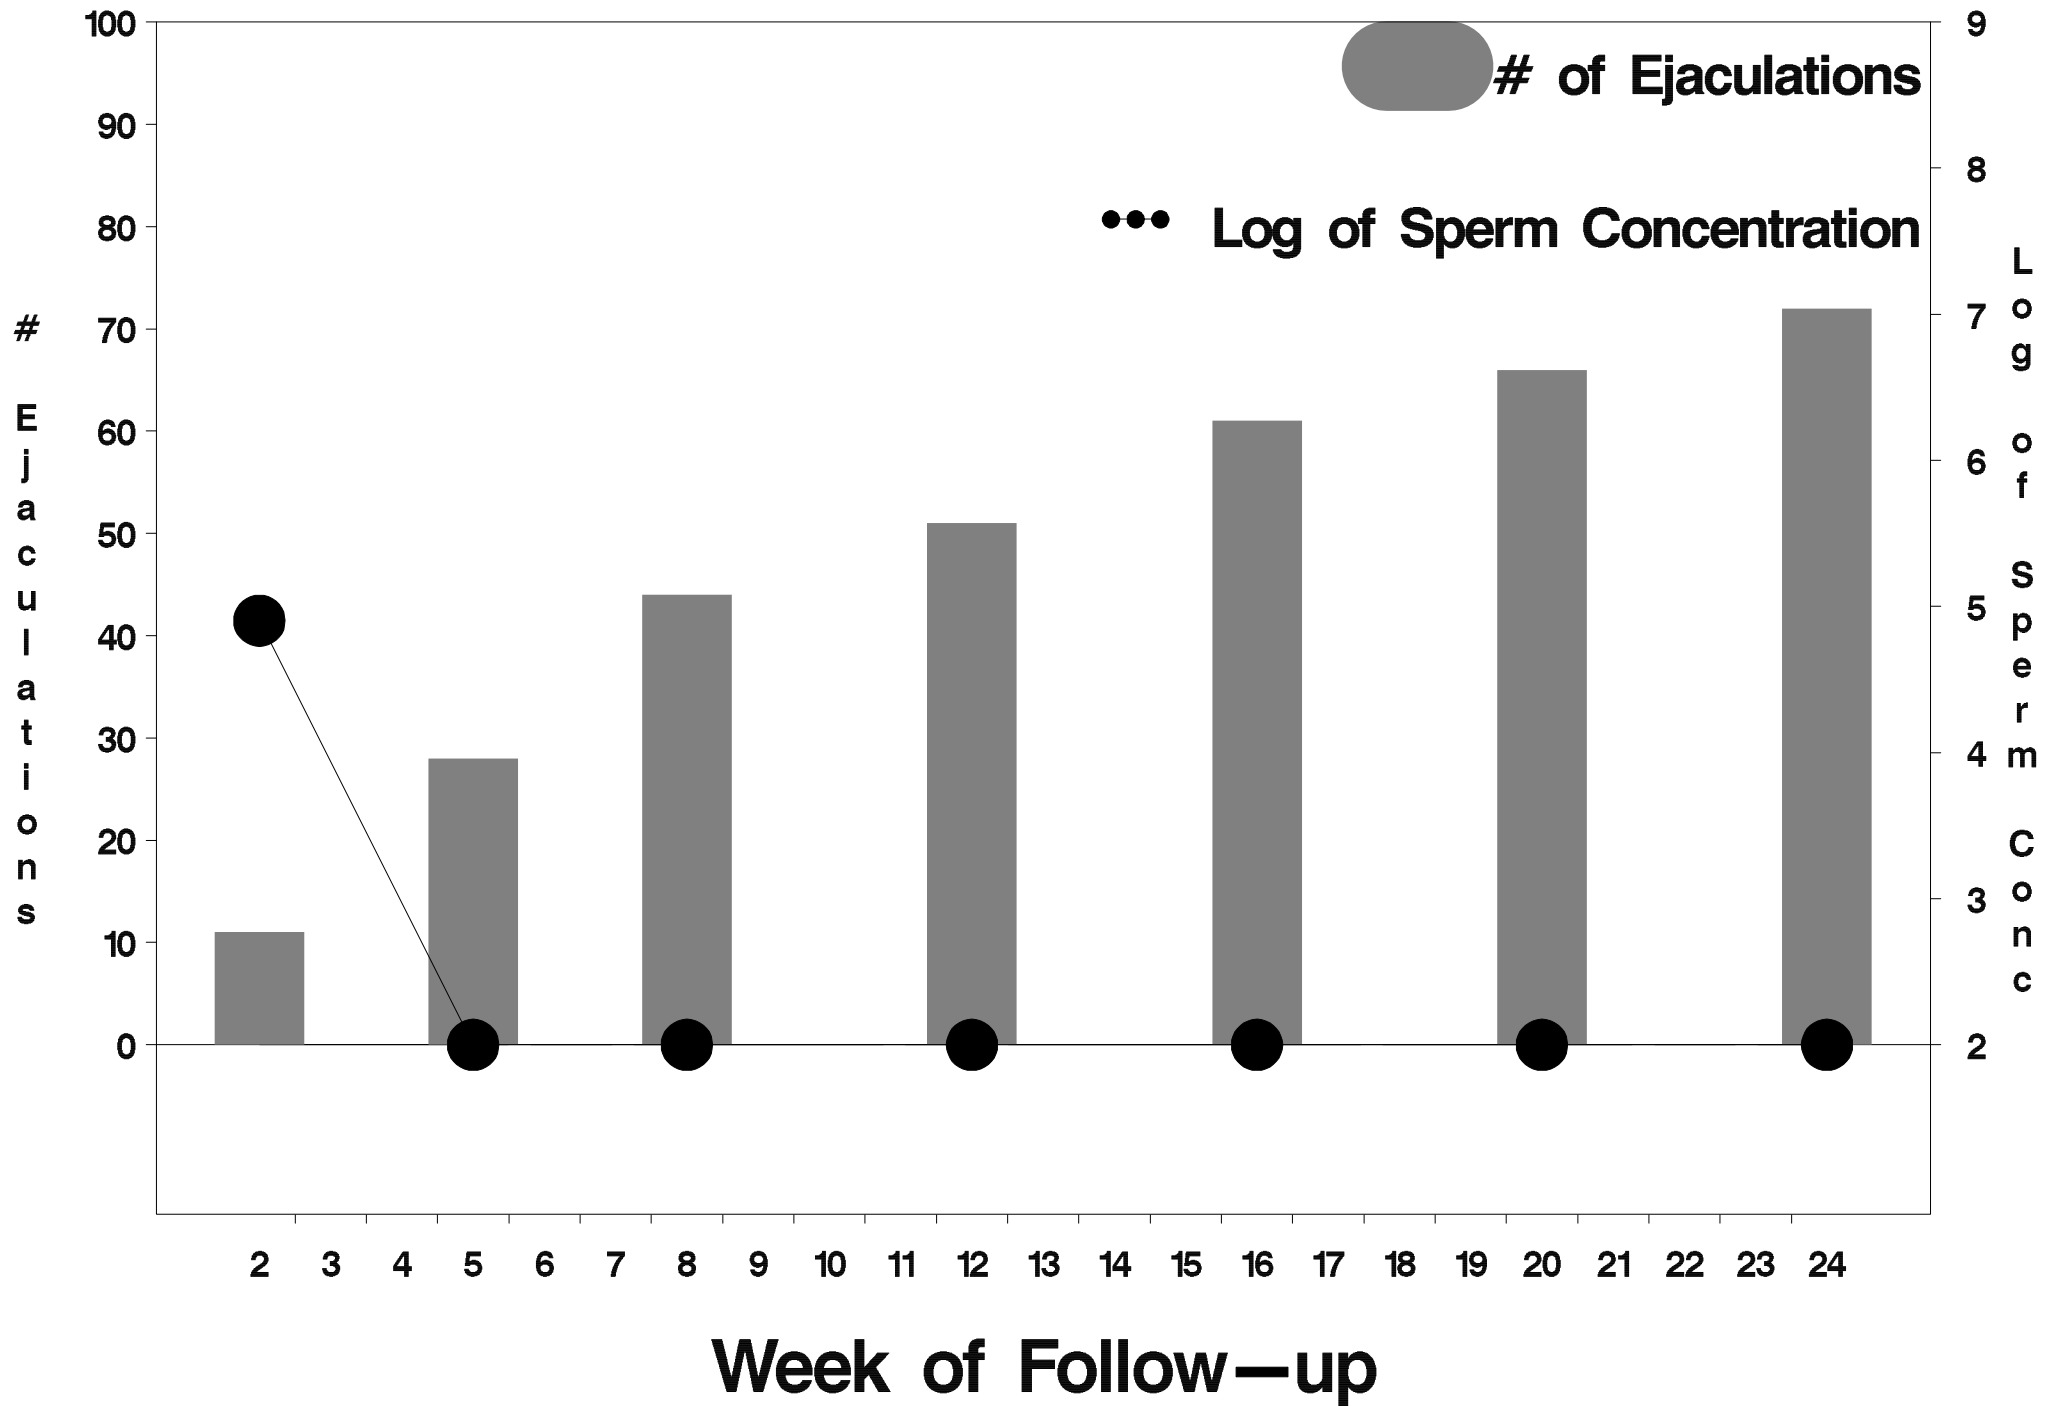

# Participant number= 528

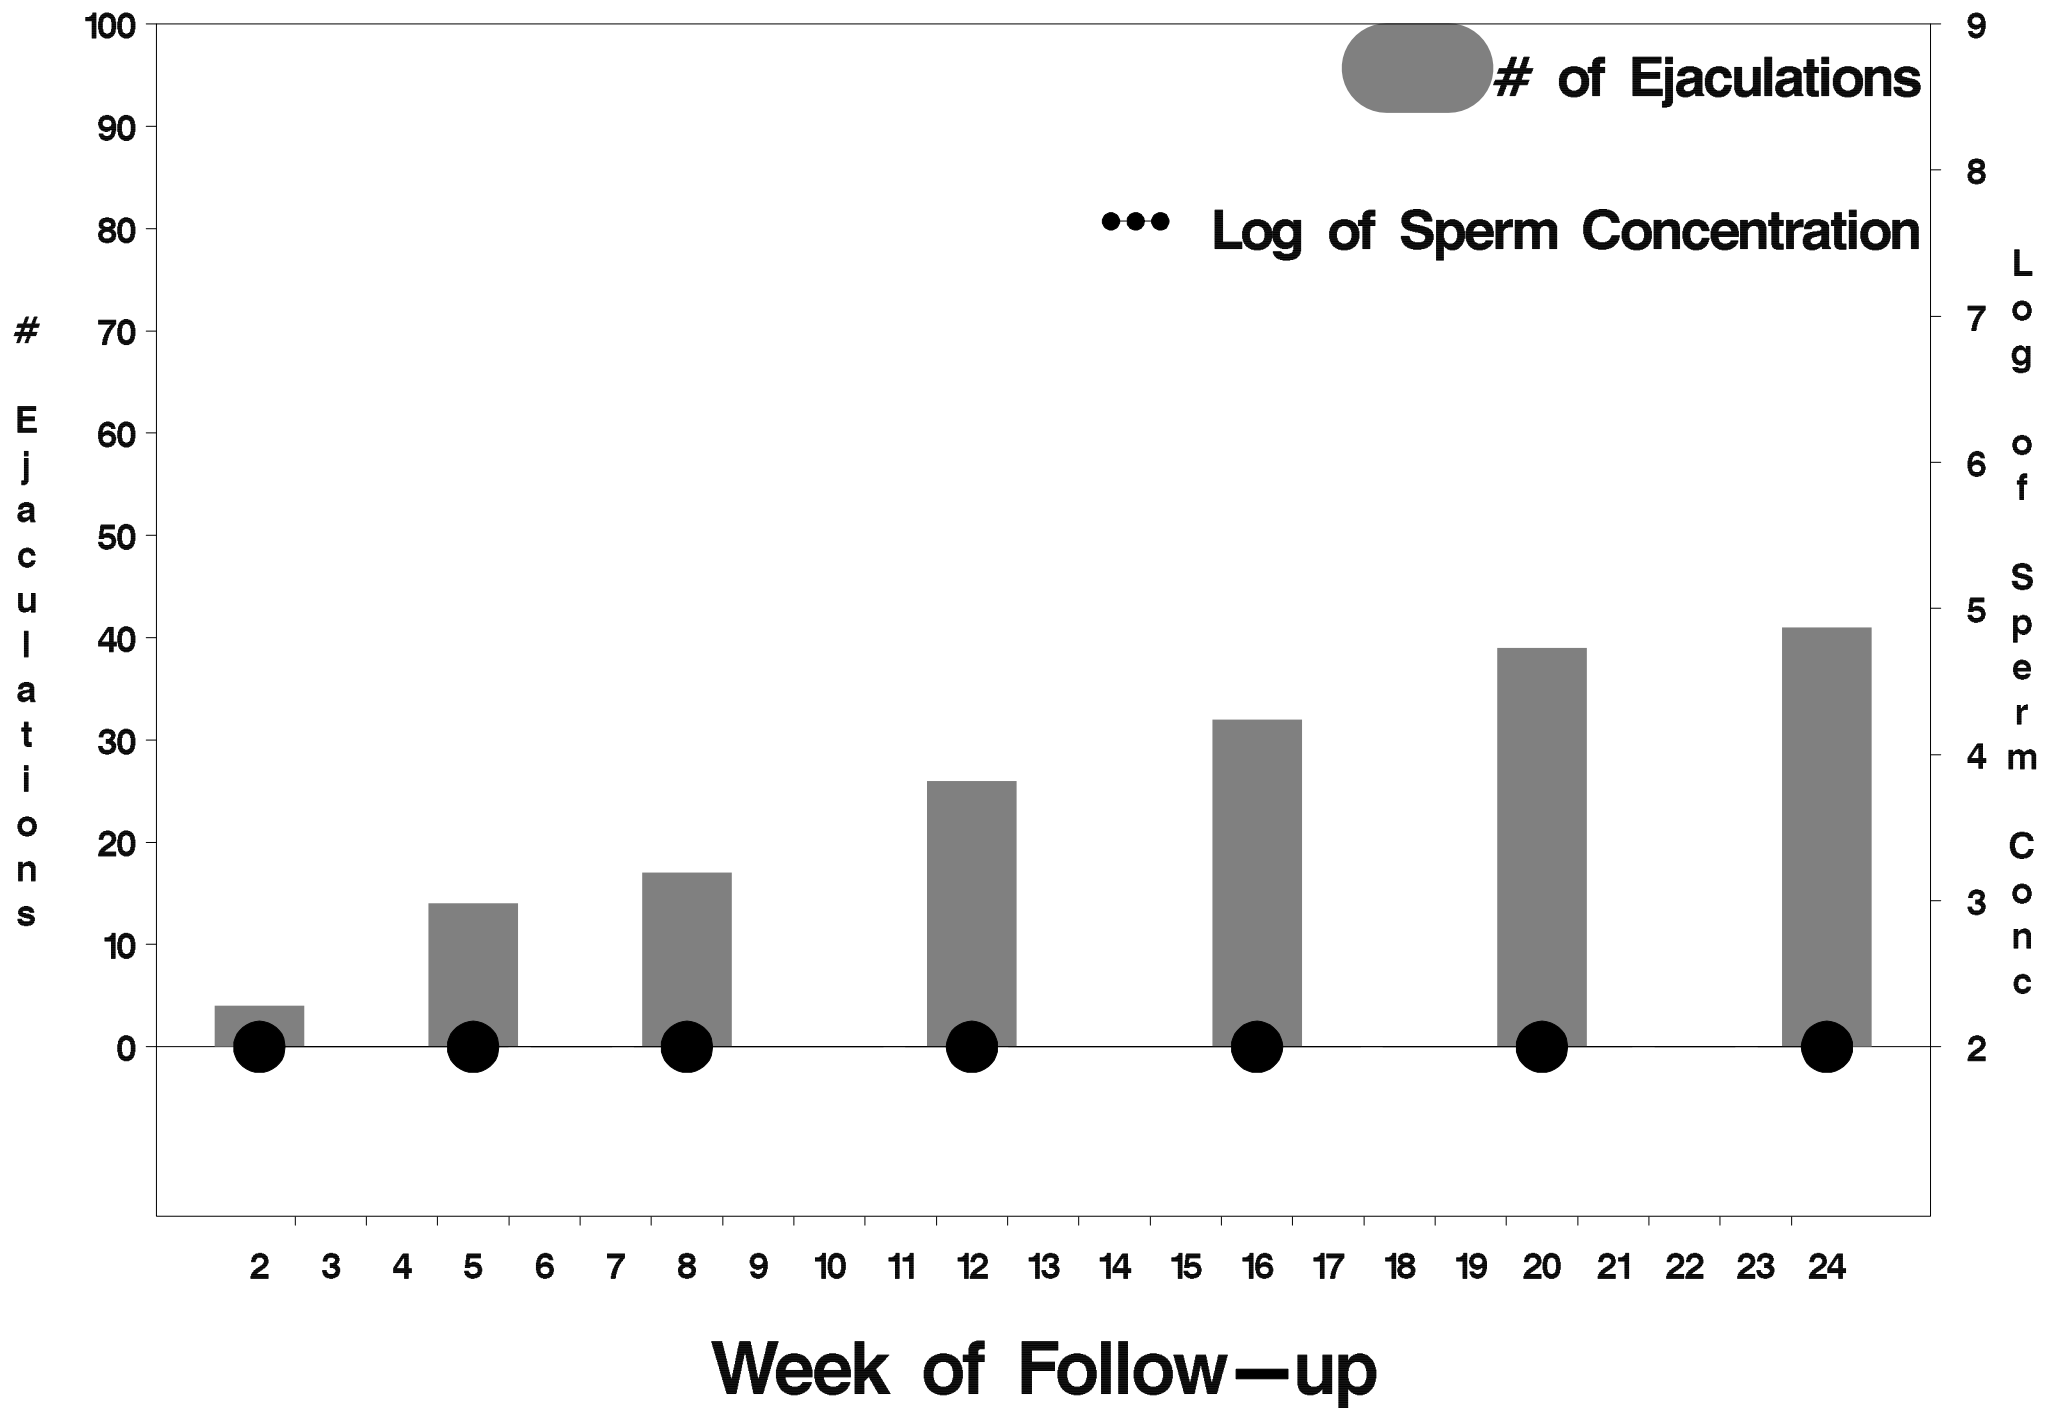

# Participant number= 529

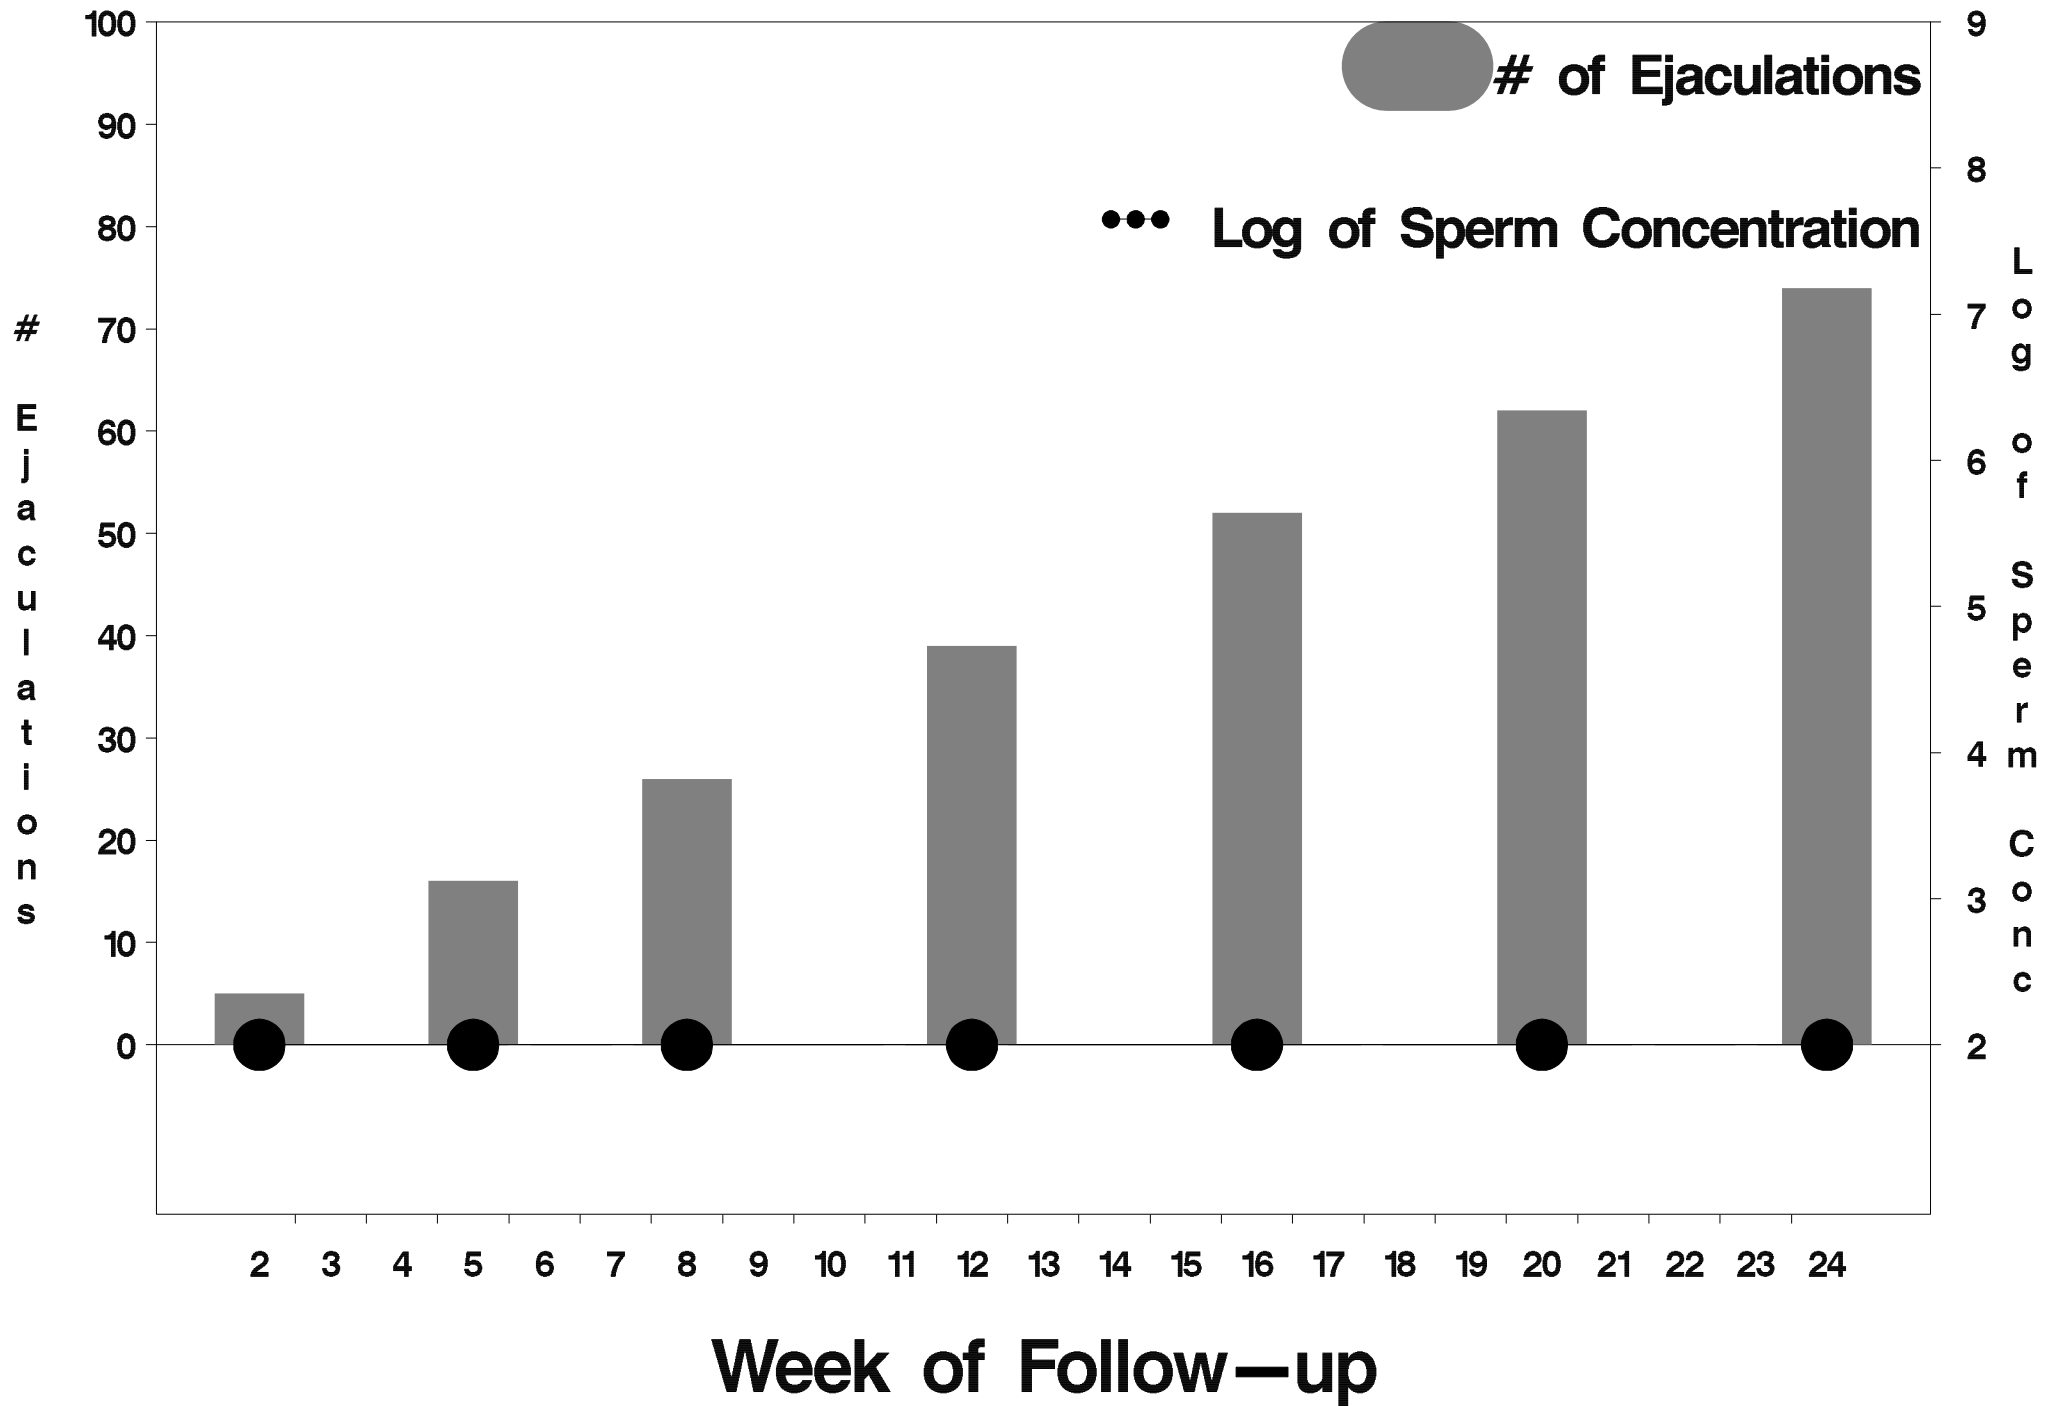

# Participant number= 530

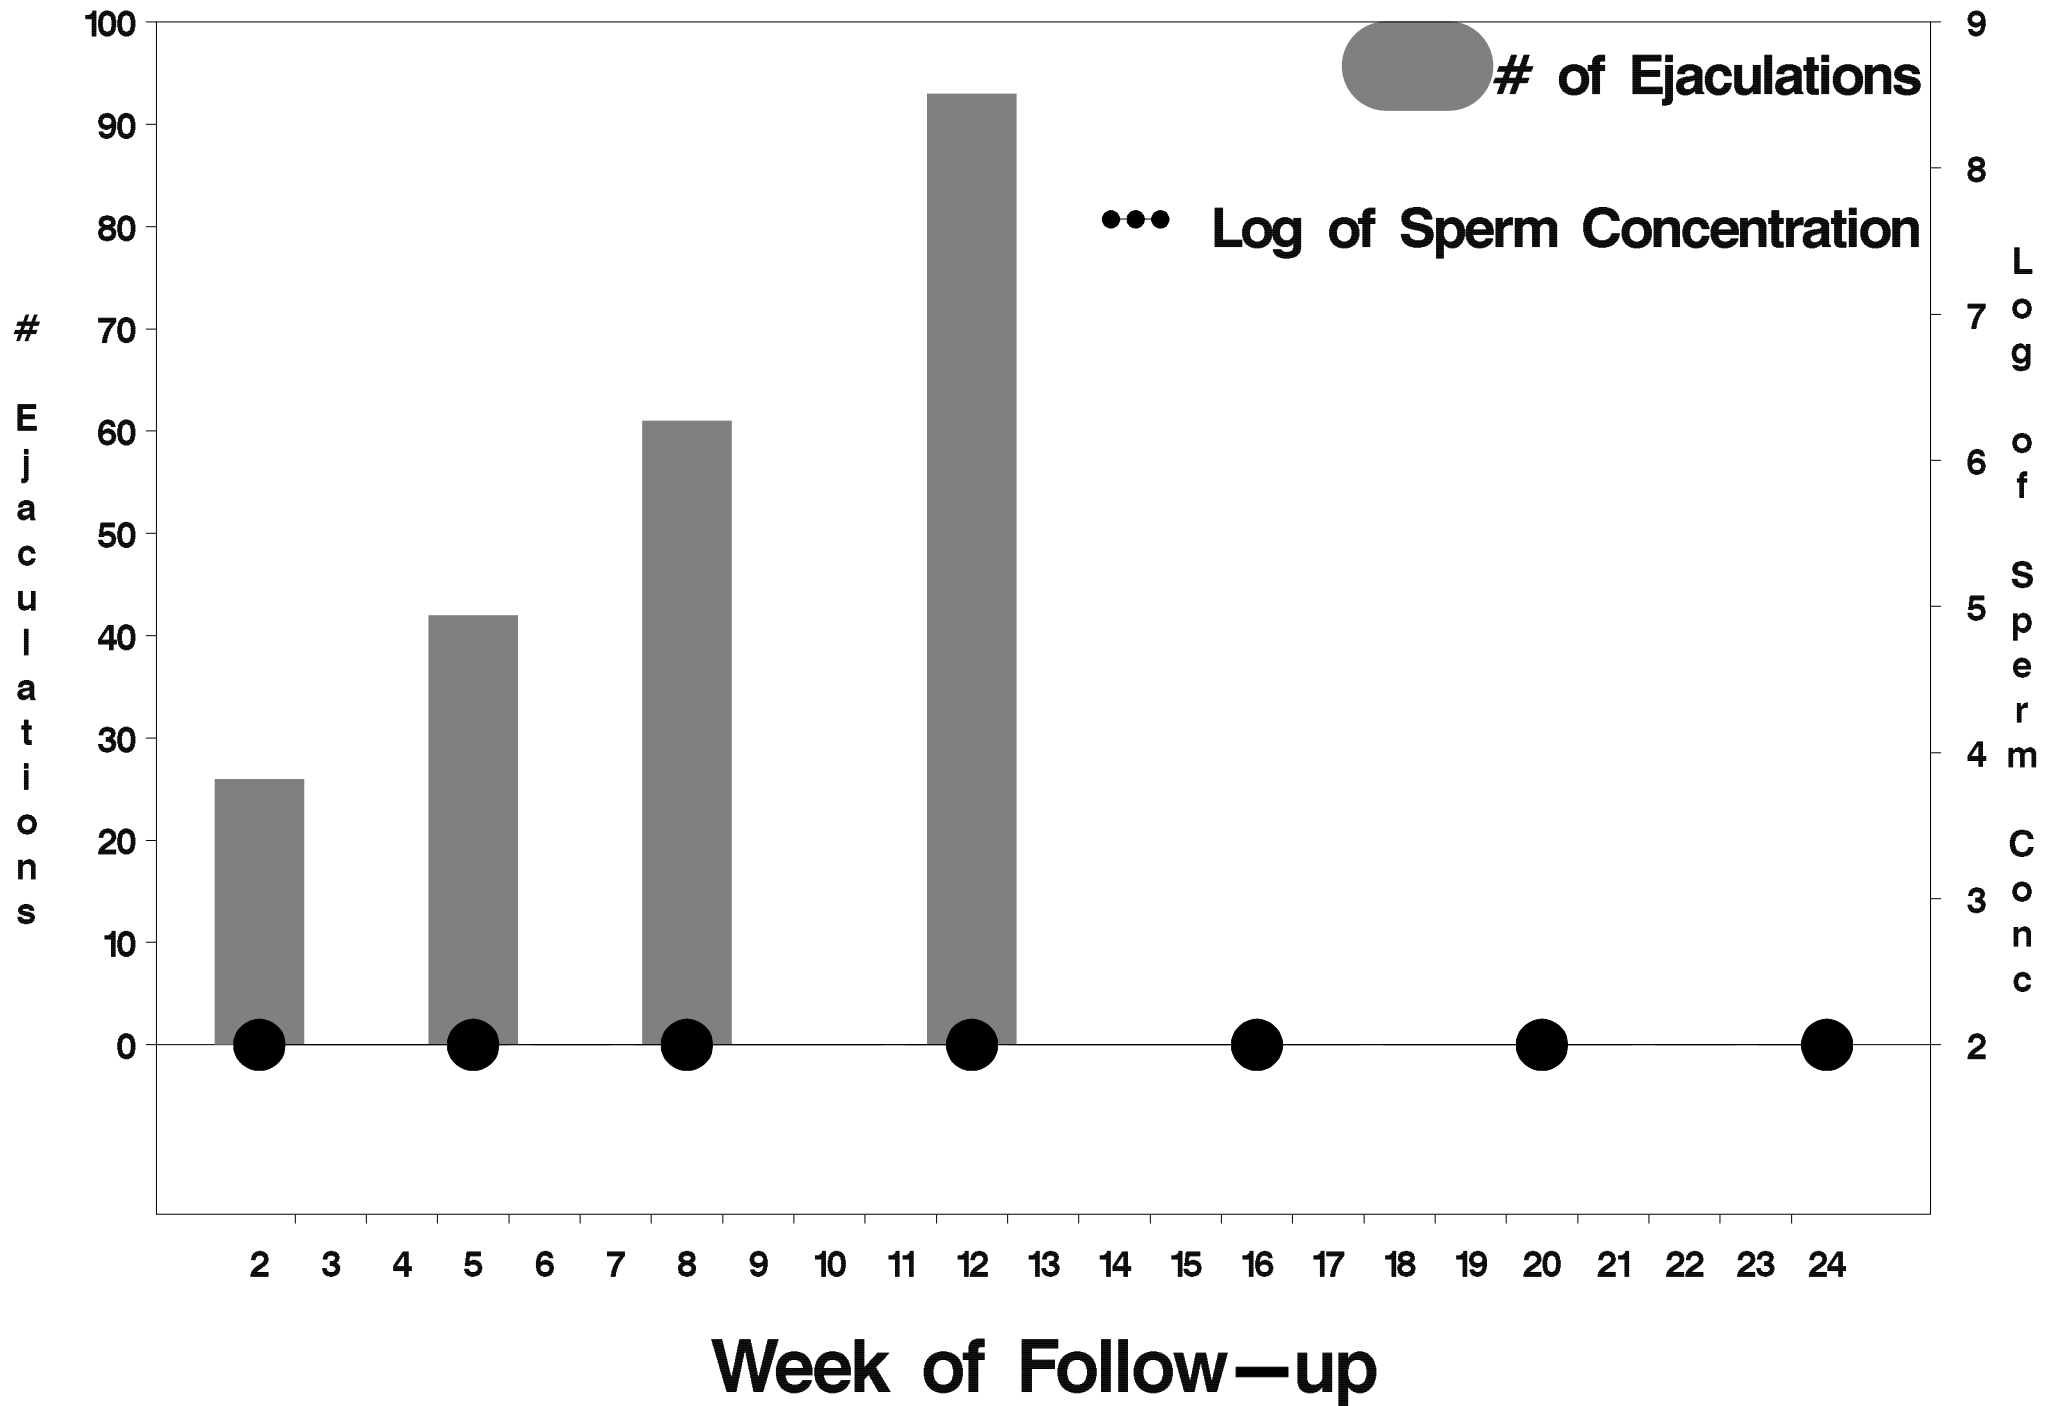

# Participant number= 531

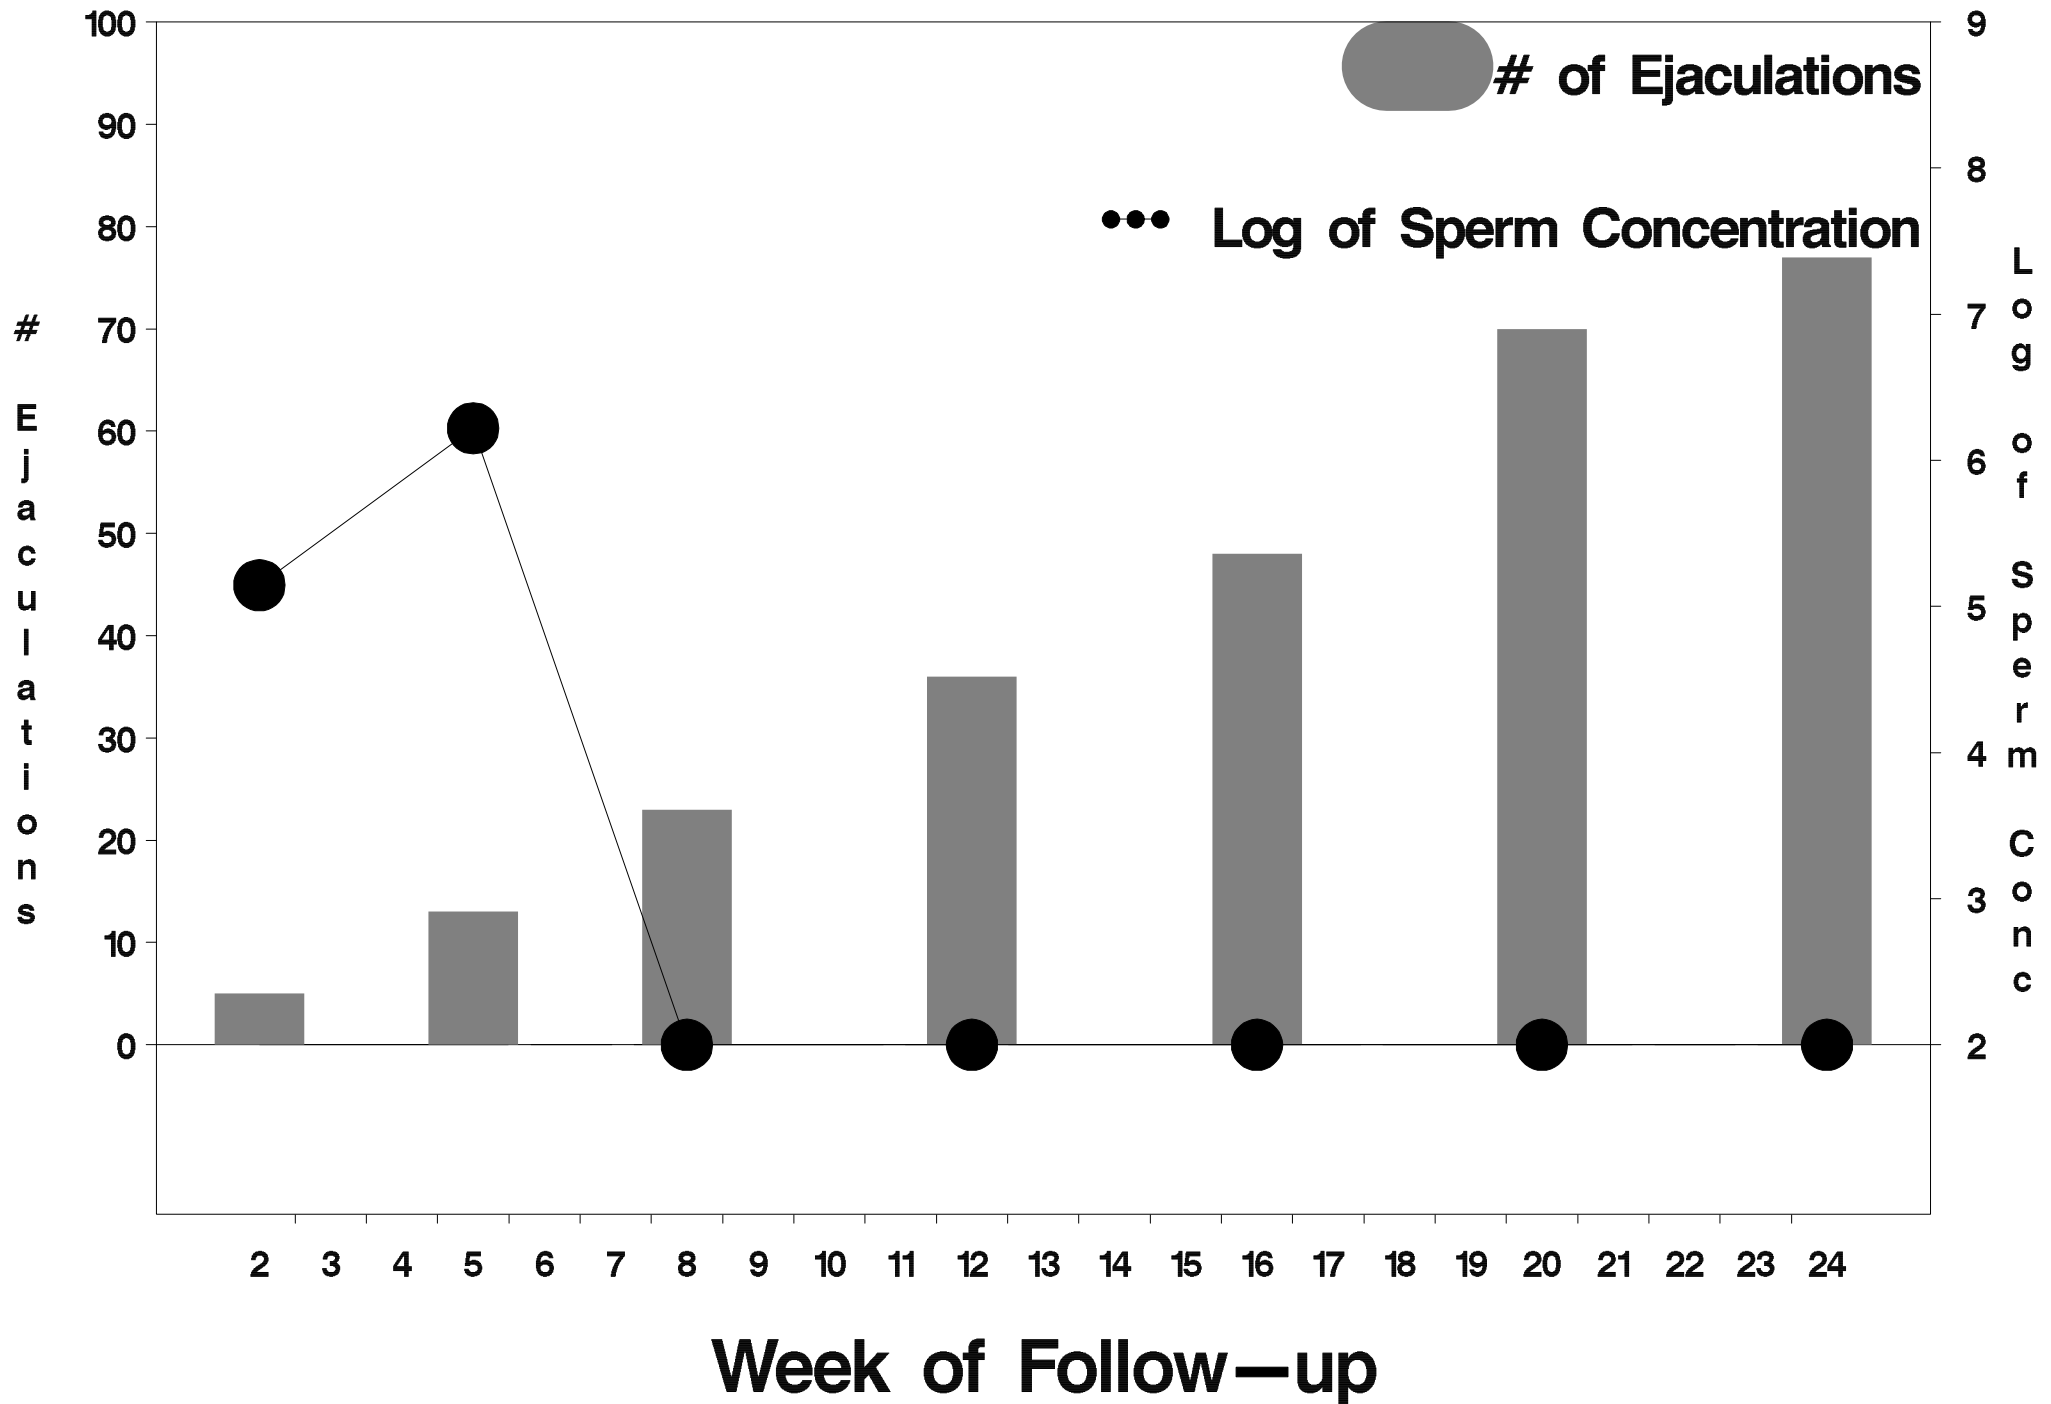

# Participant number= 532

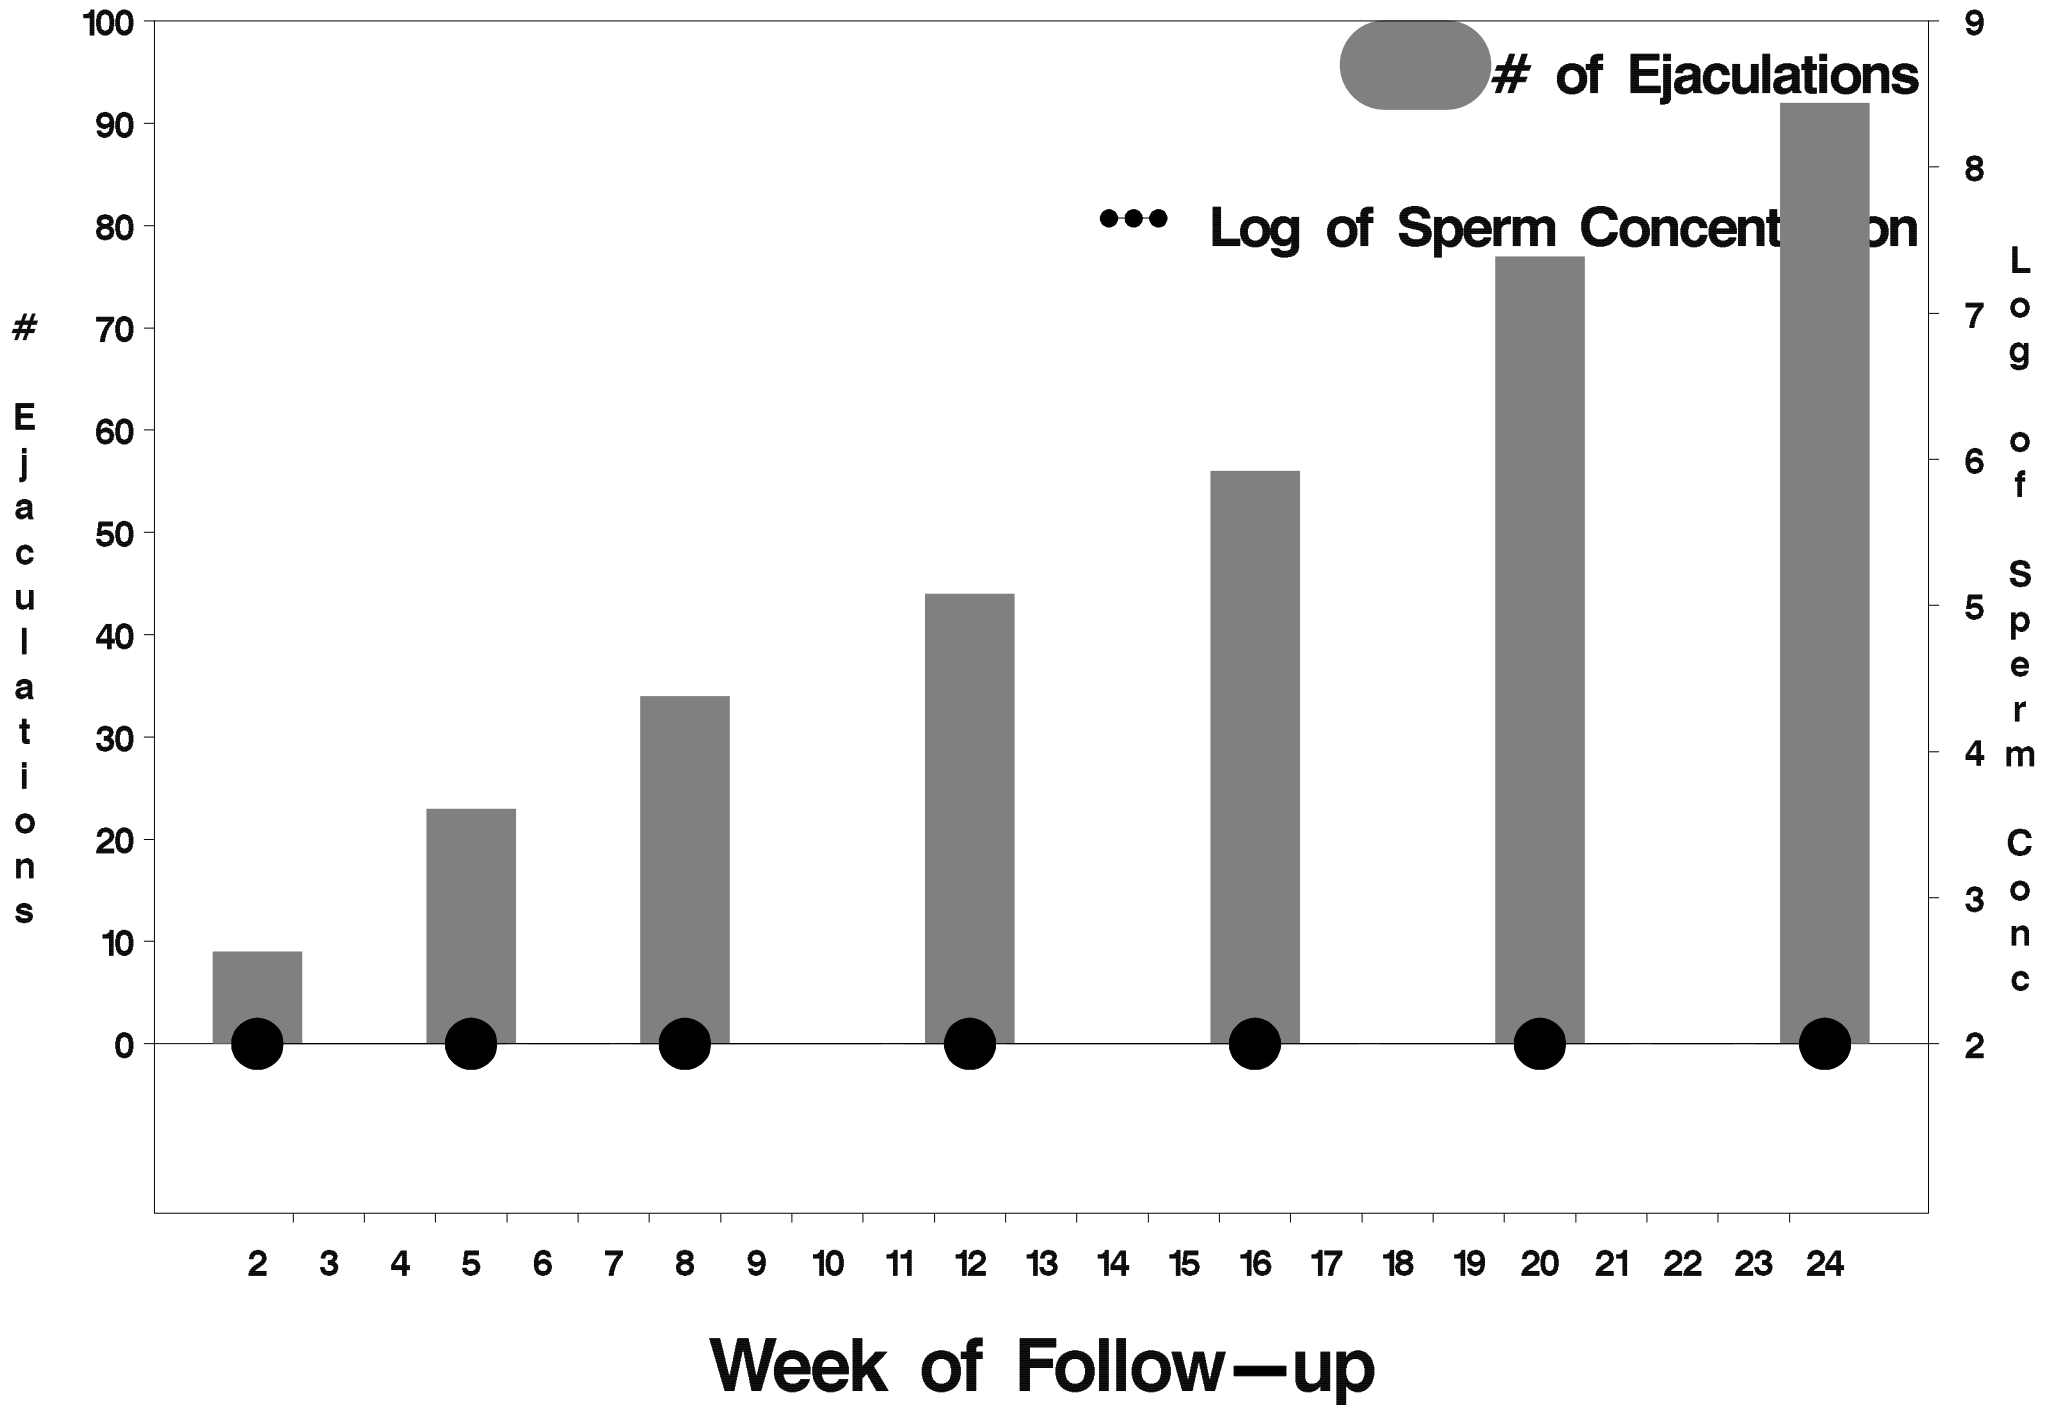

# Participant number= 534

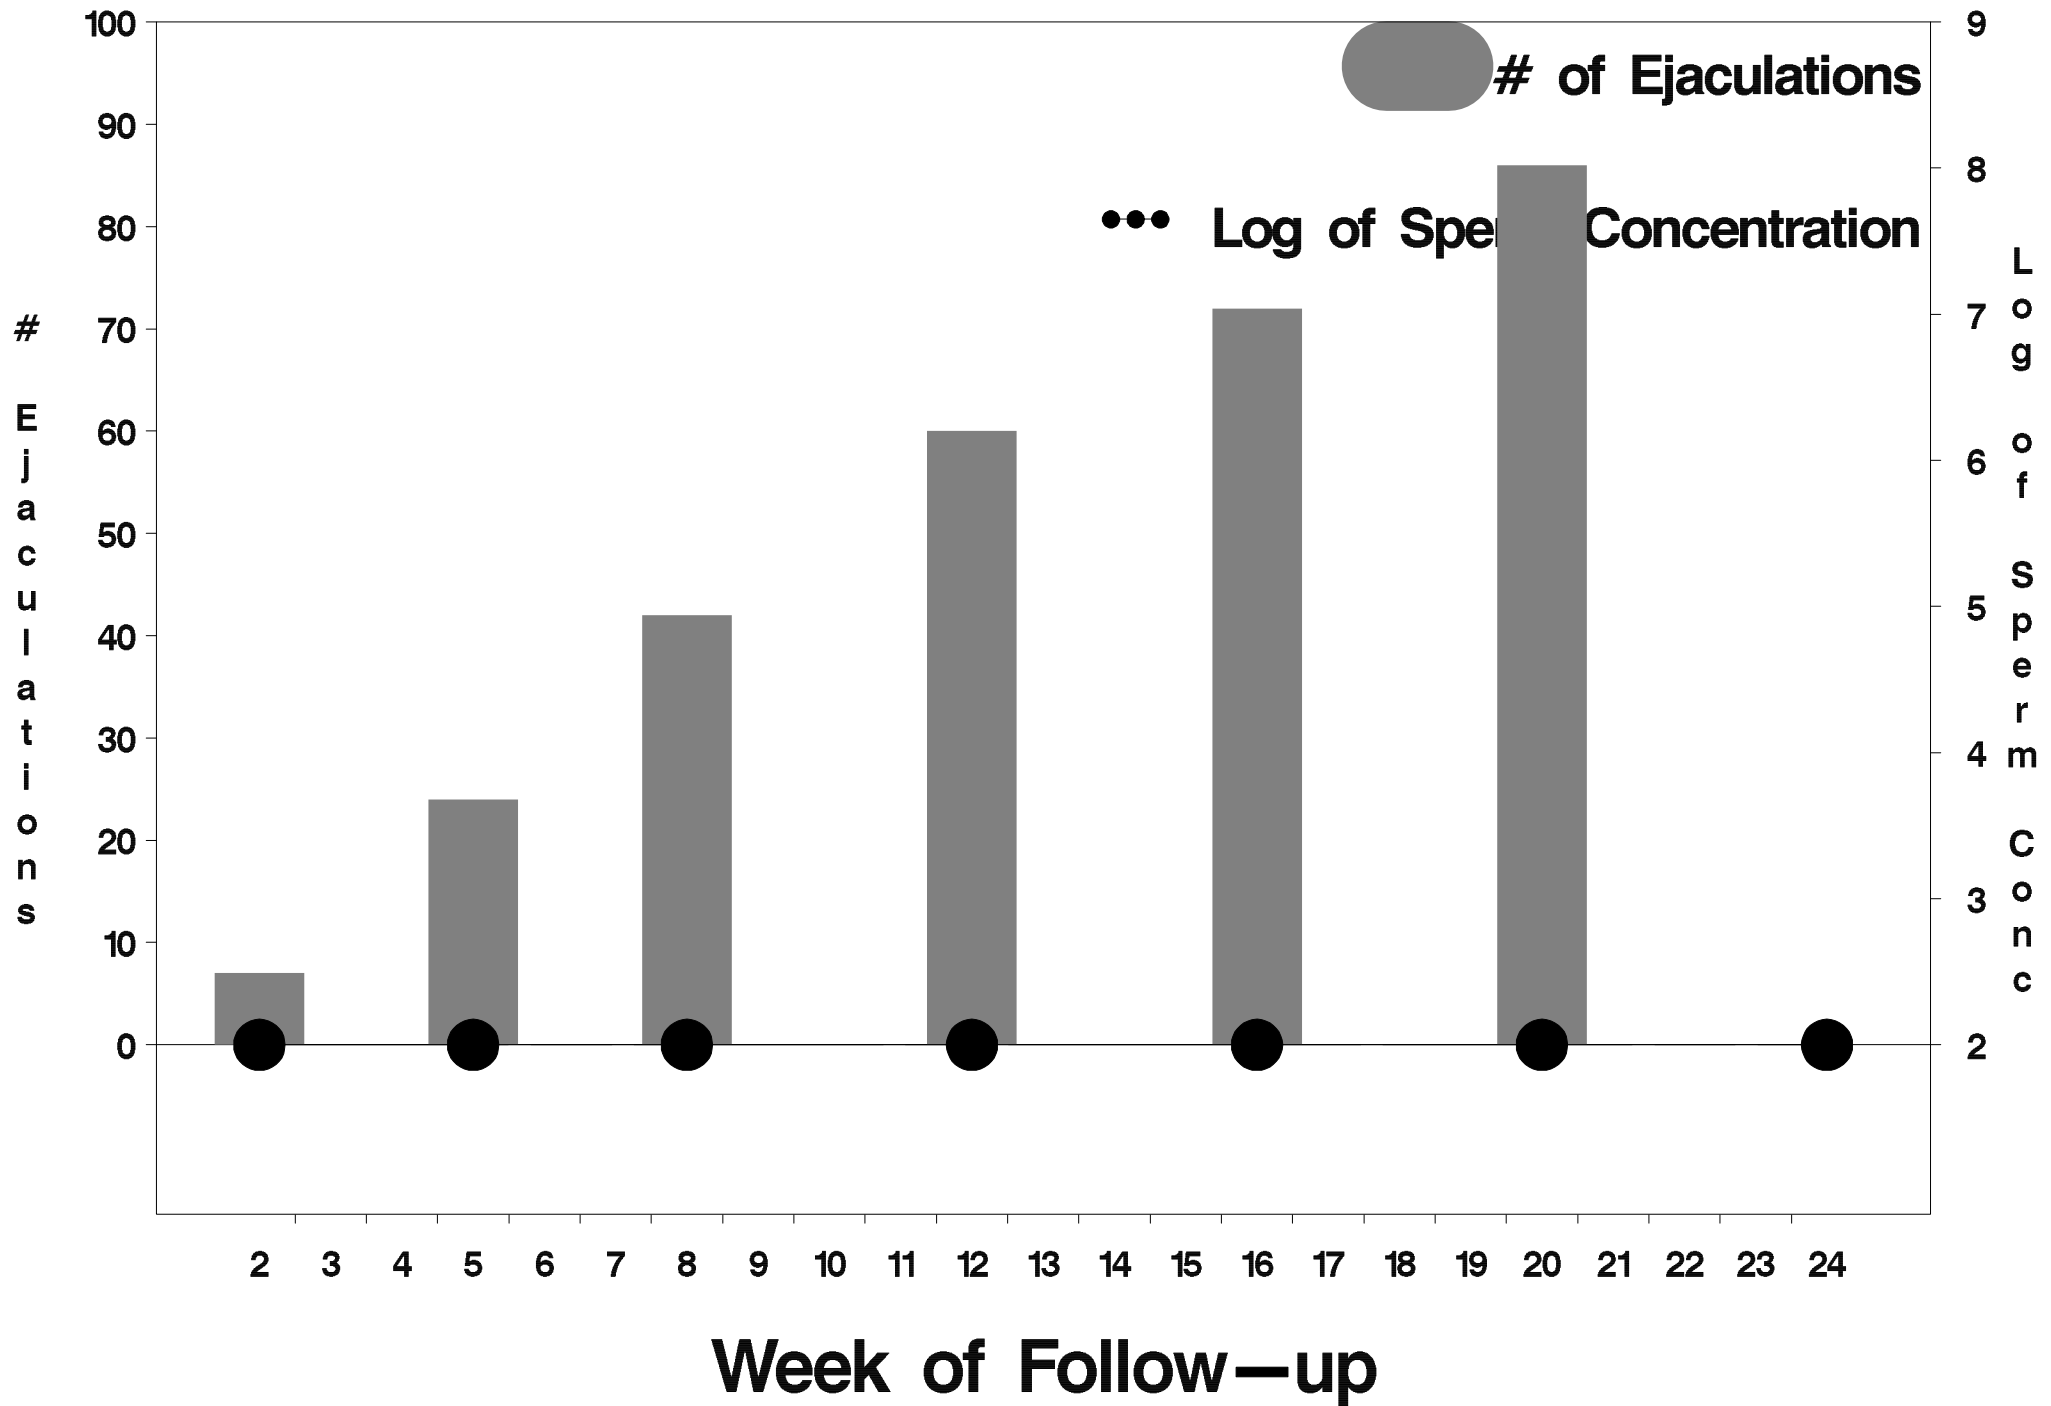

# Participant number= 535

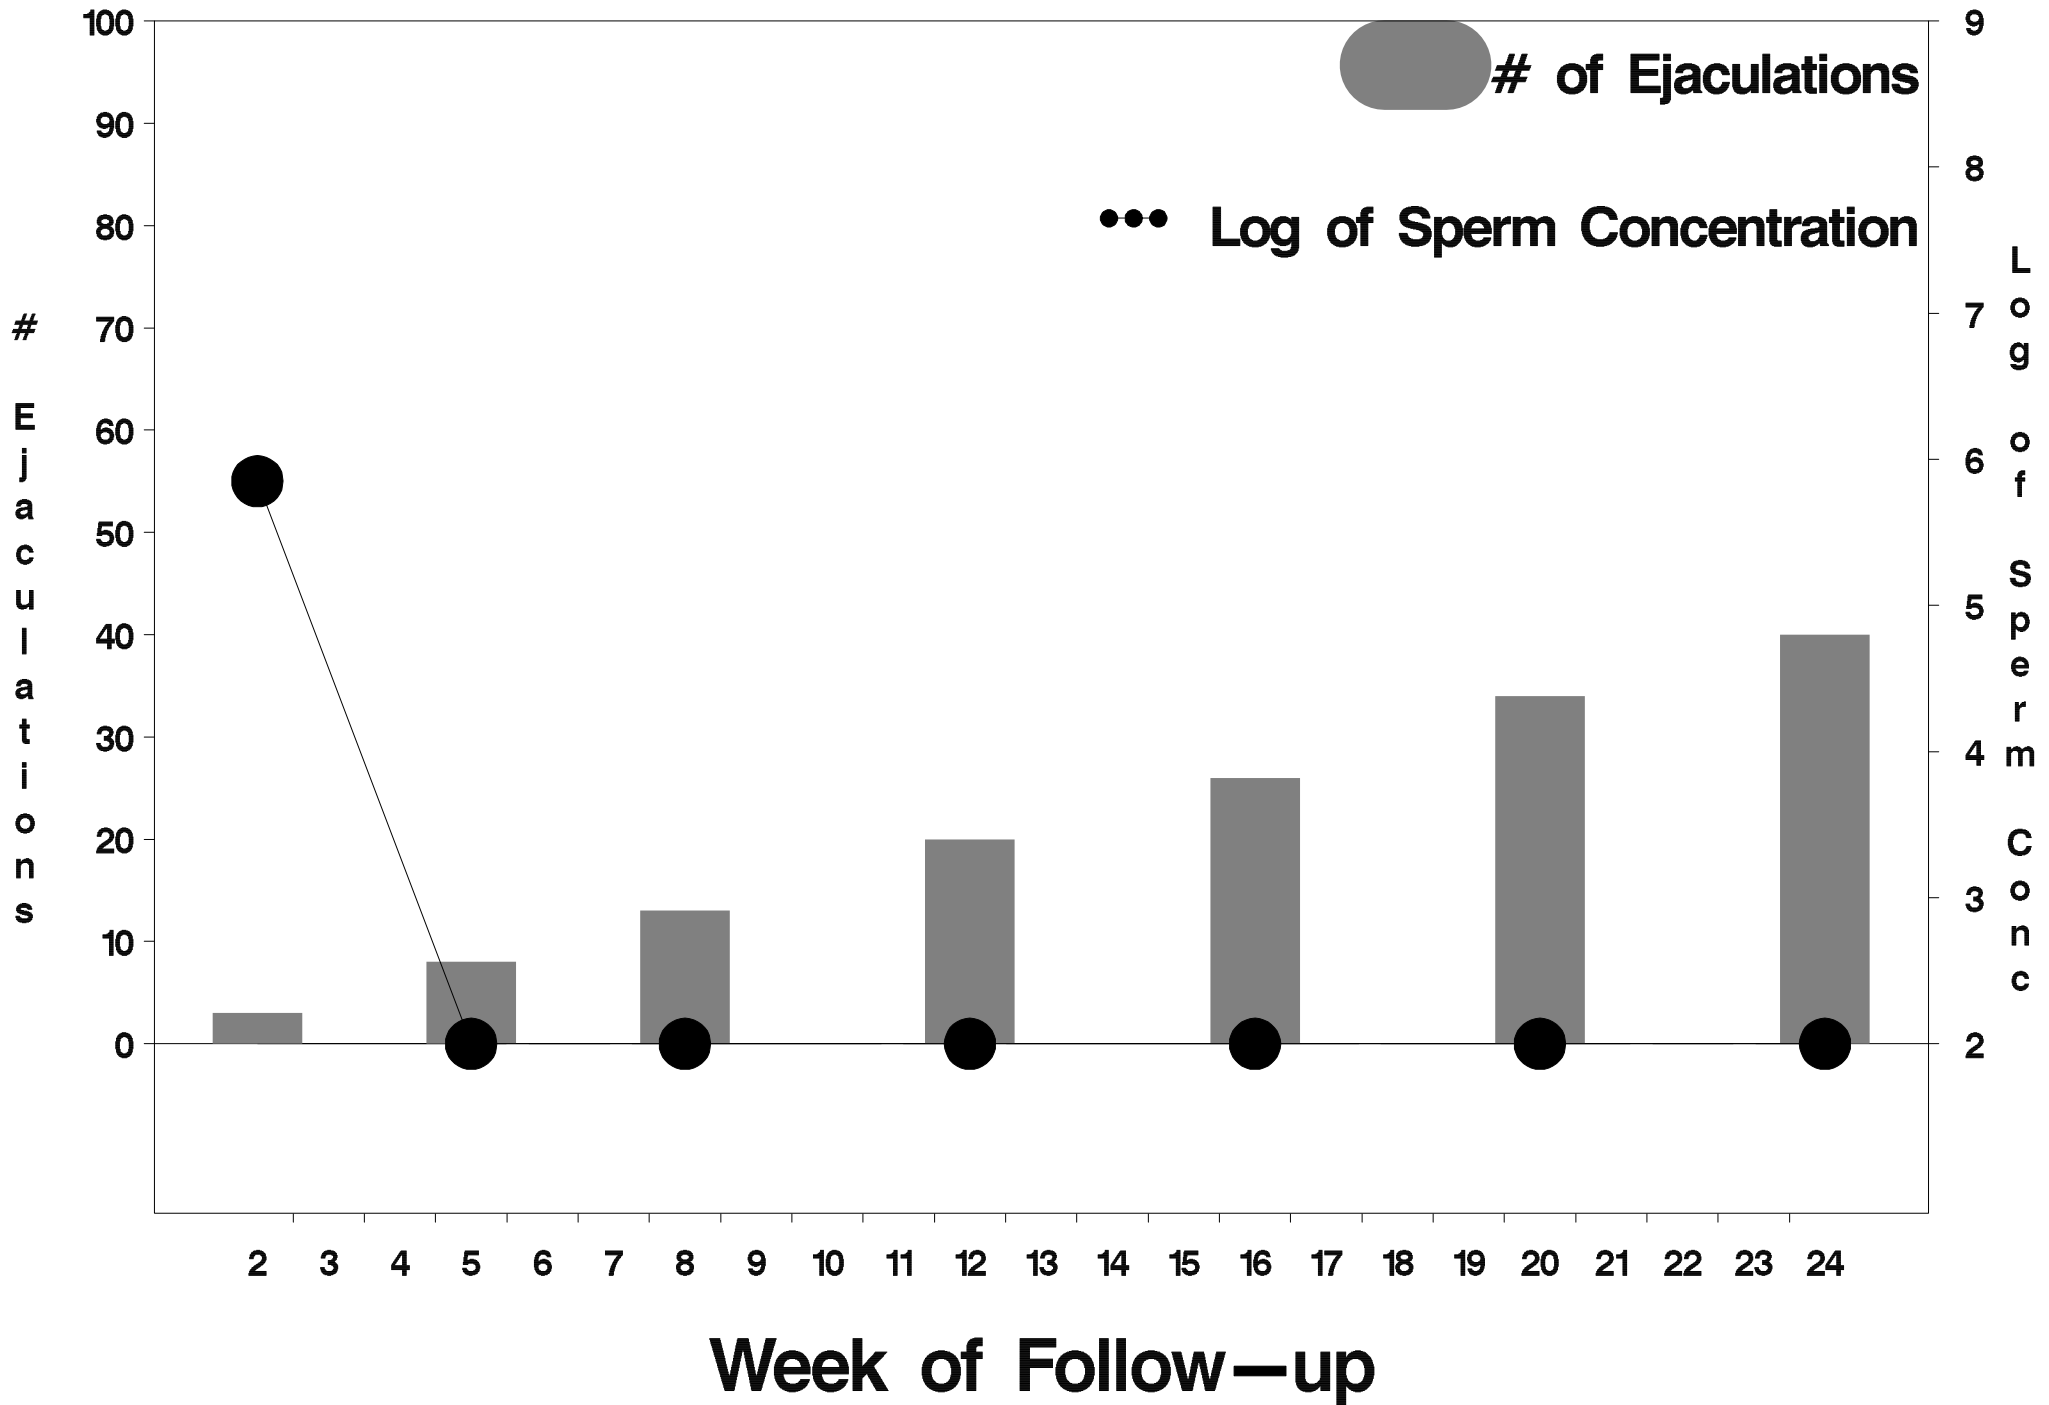



# Participant number= 536

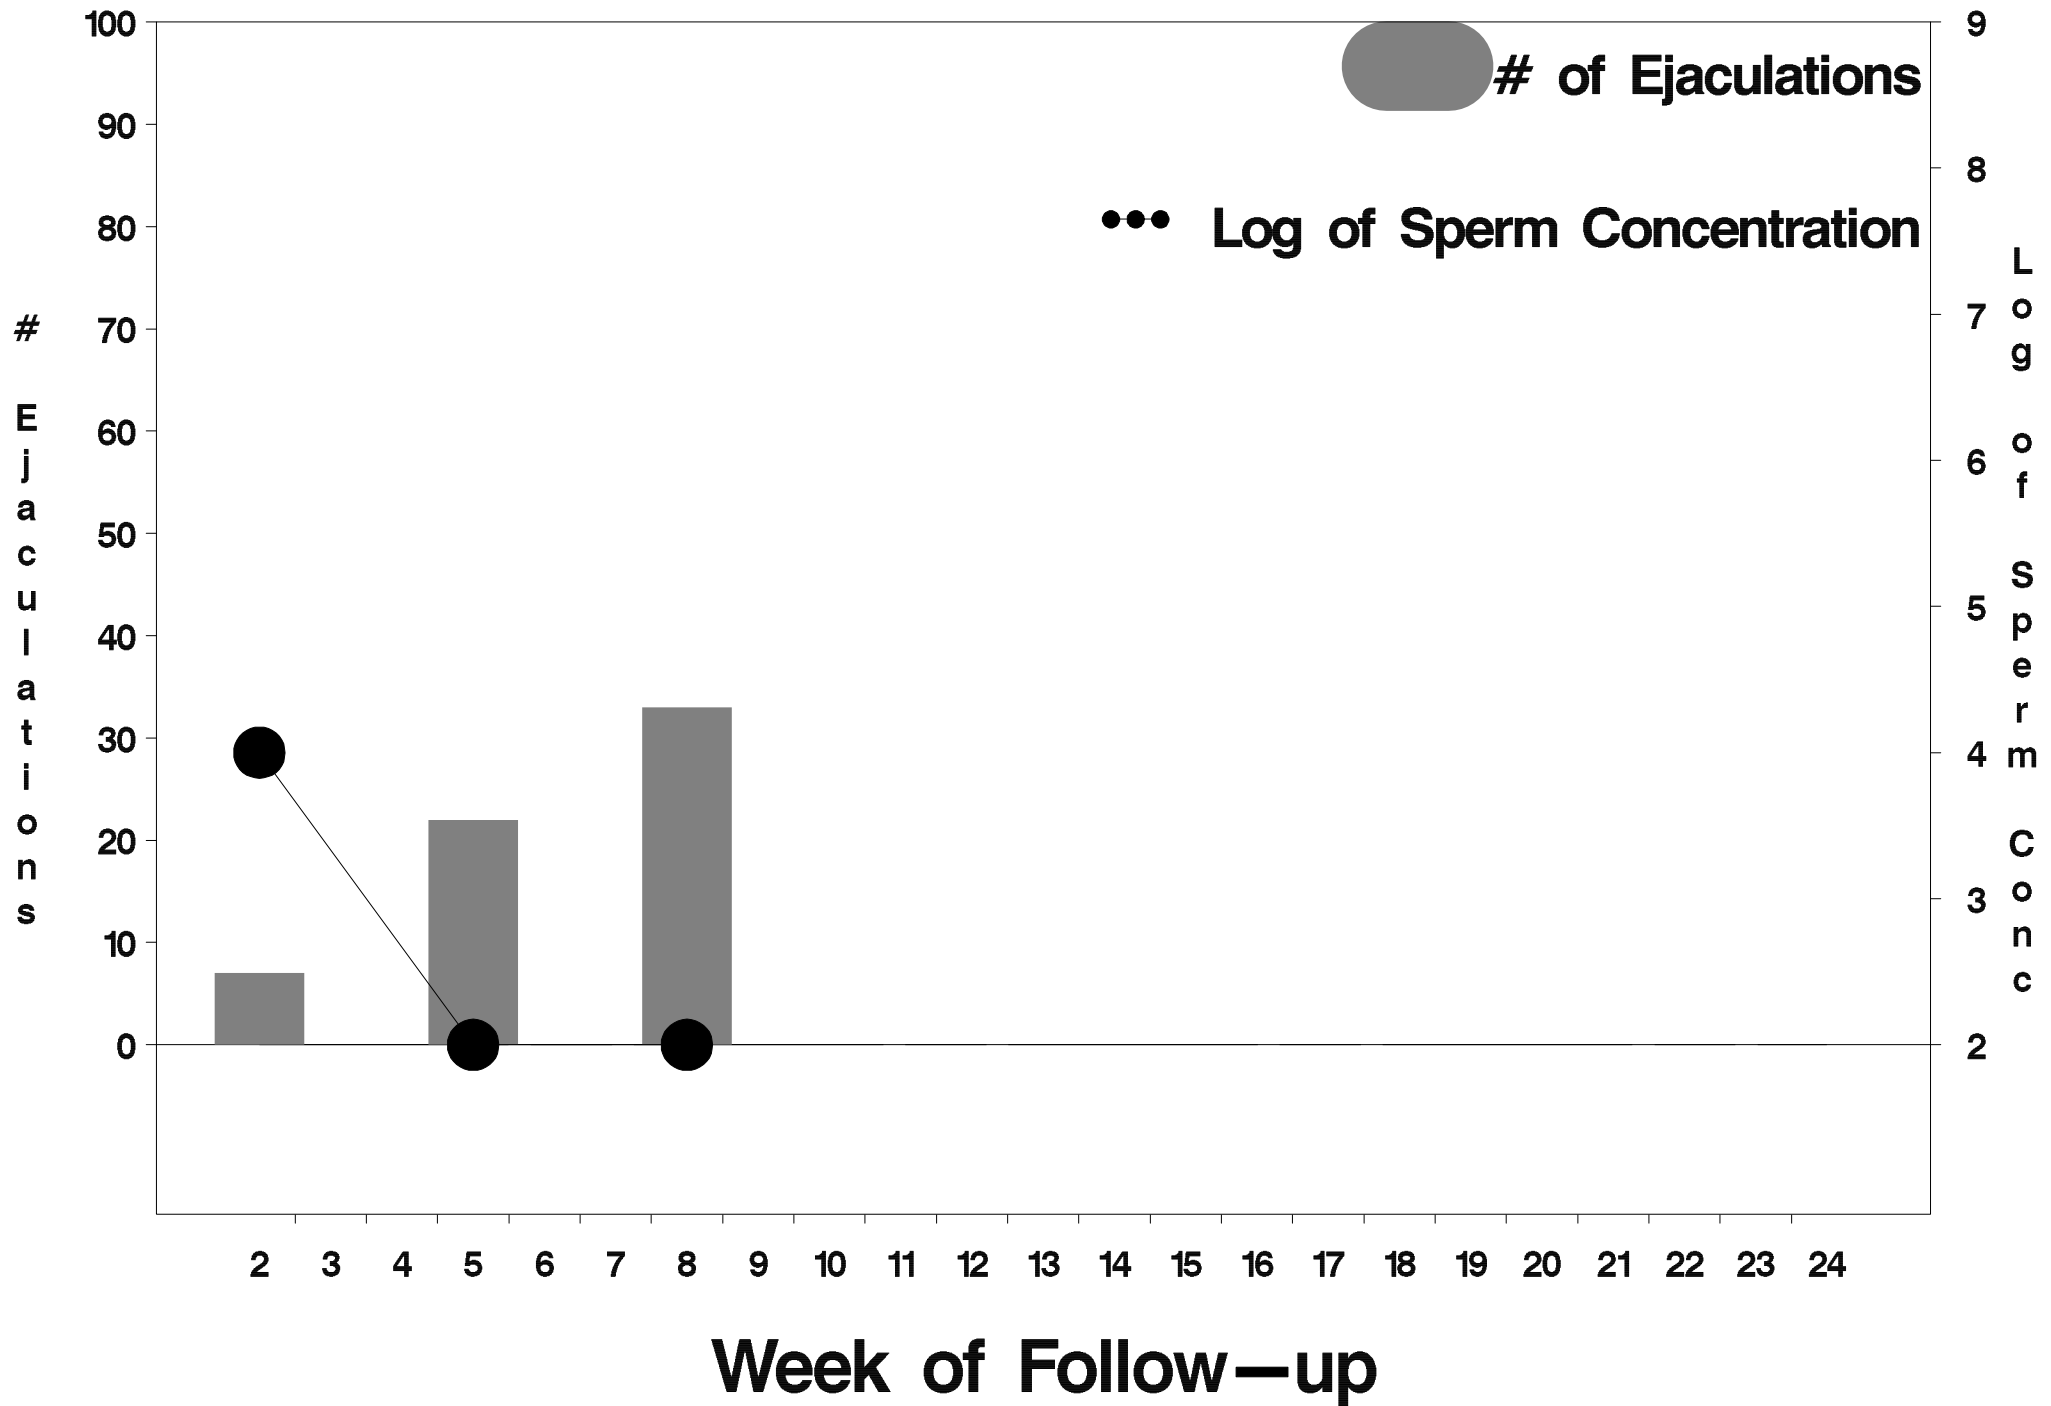

# Participant number= 537

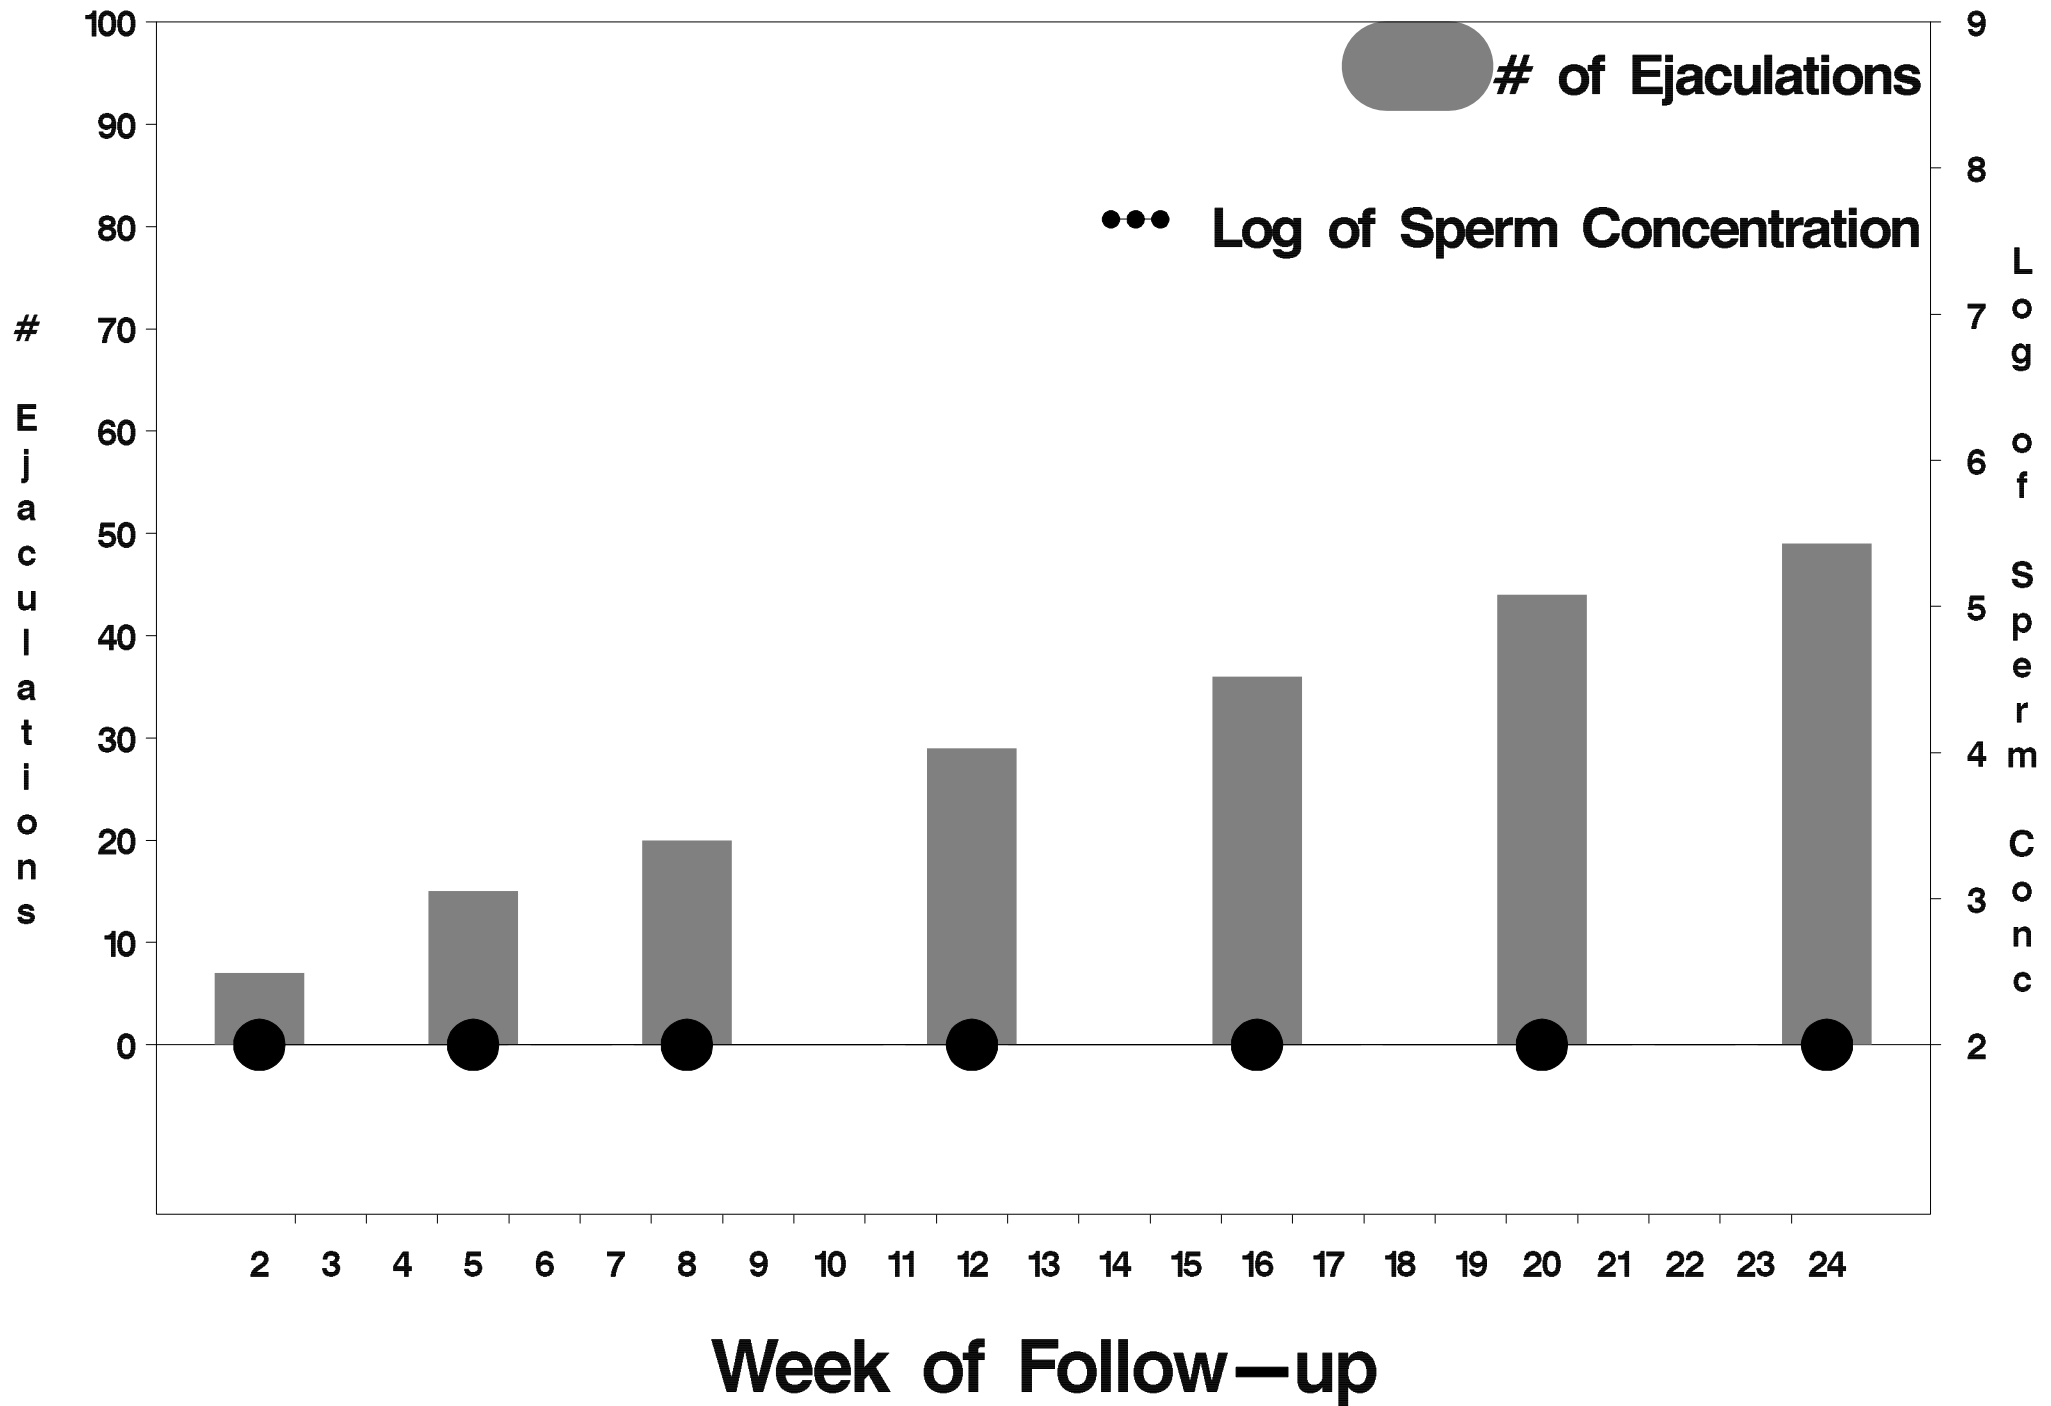

# Participant number= 538

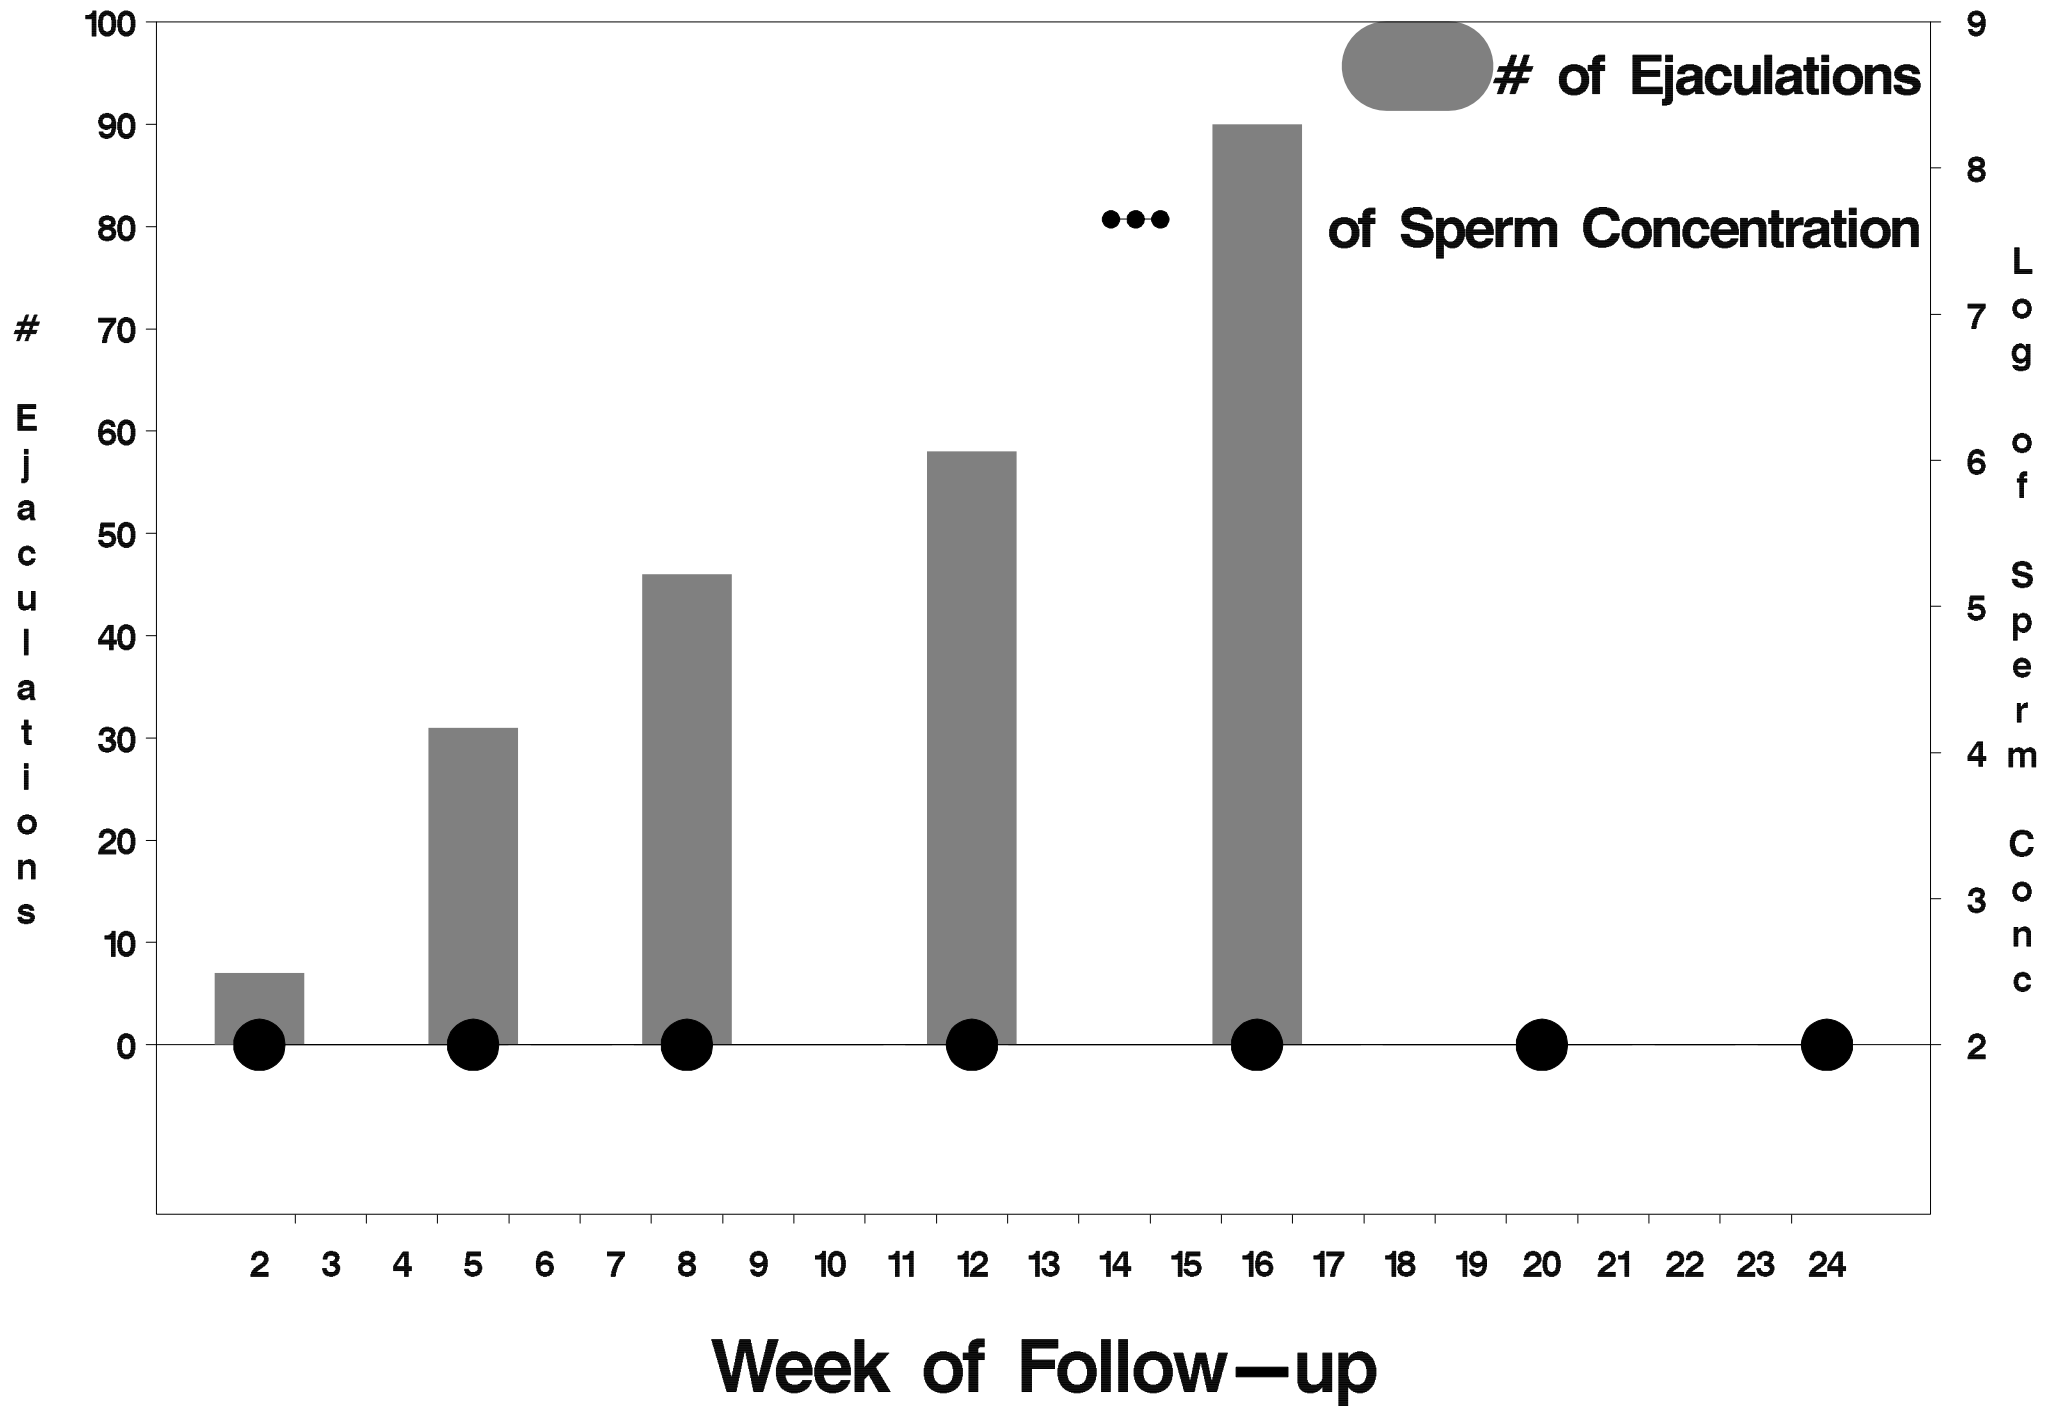

# Participant number= 539

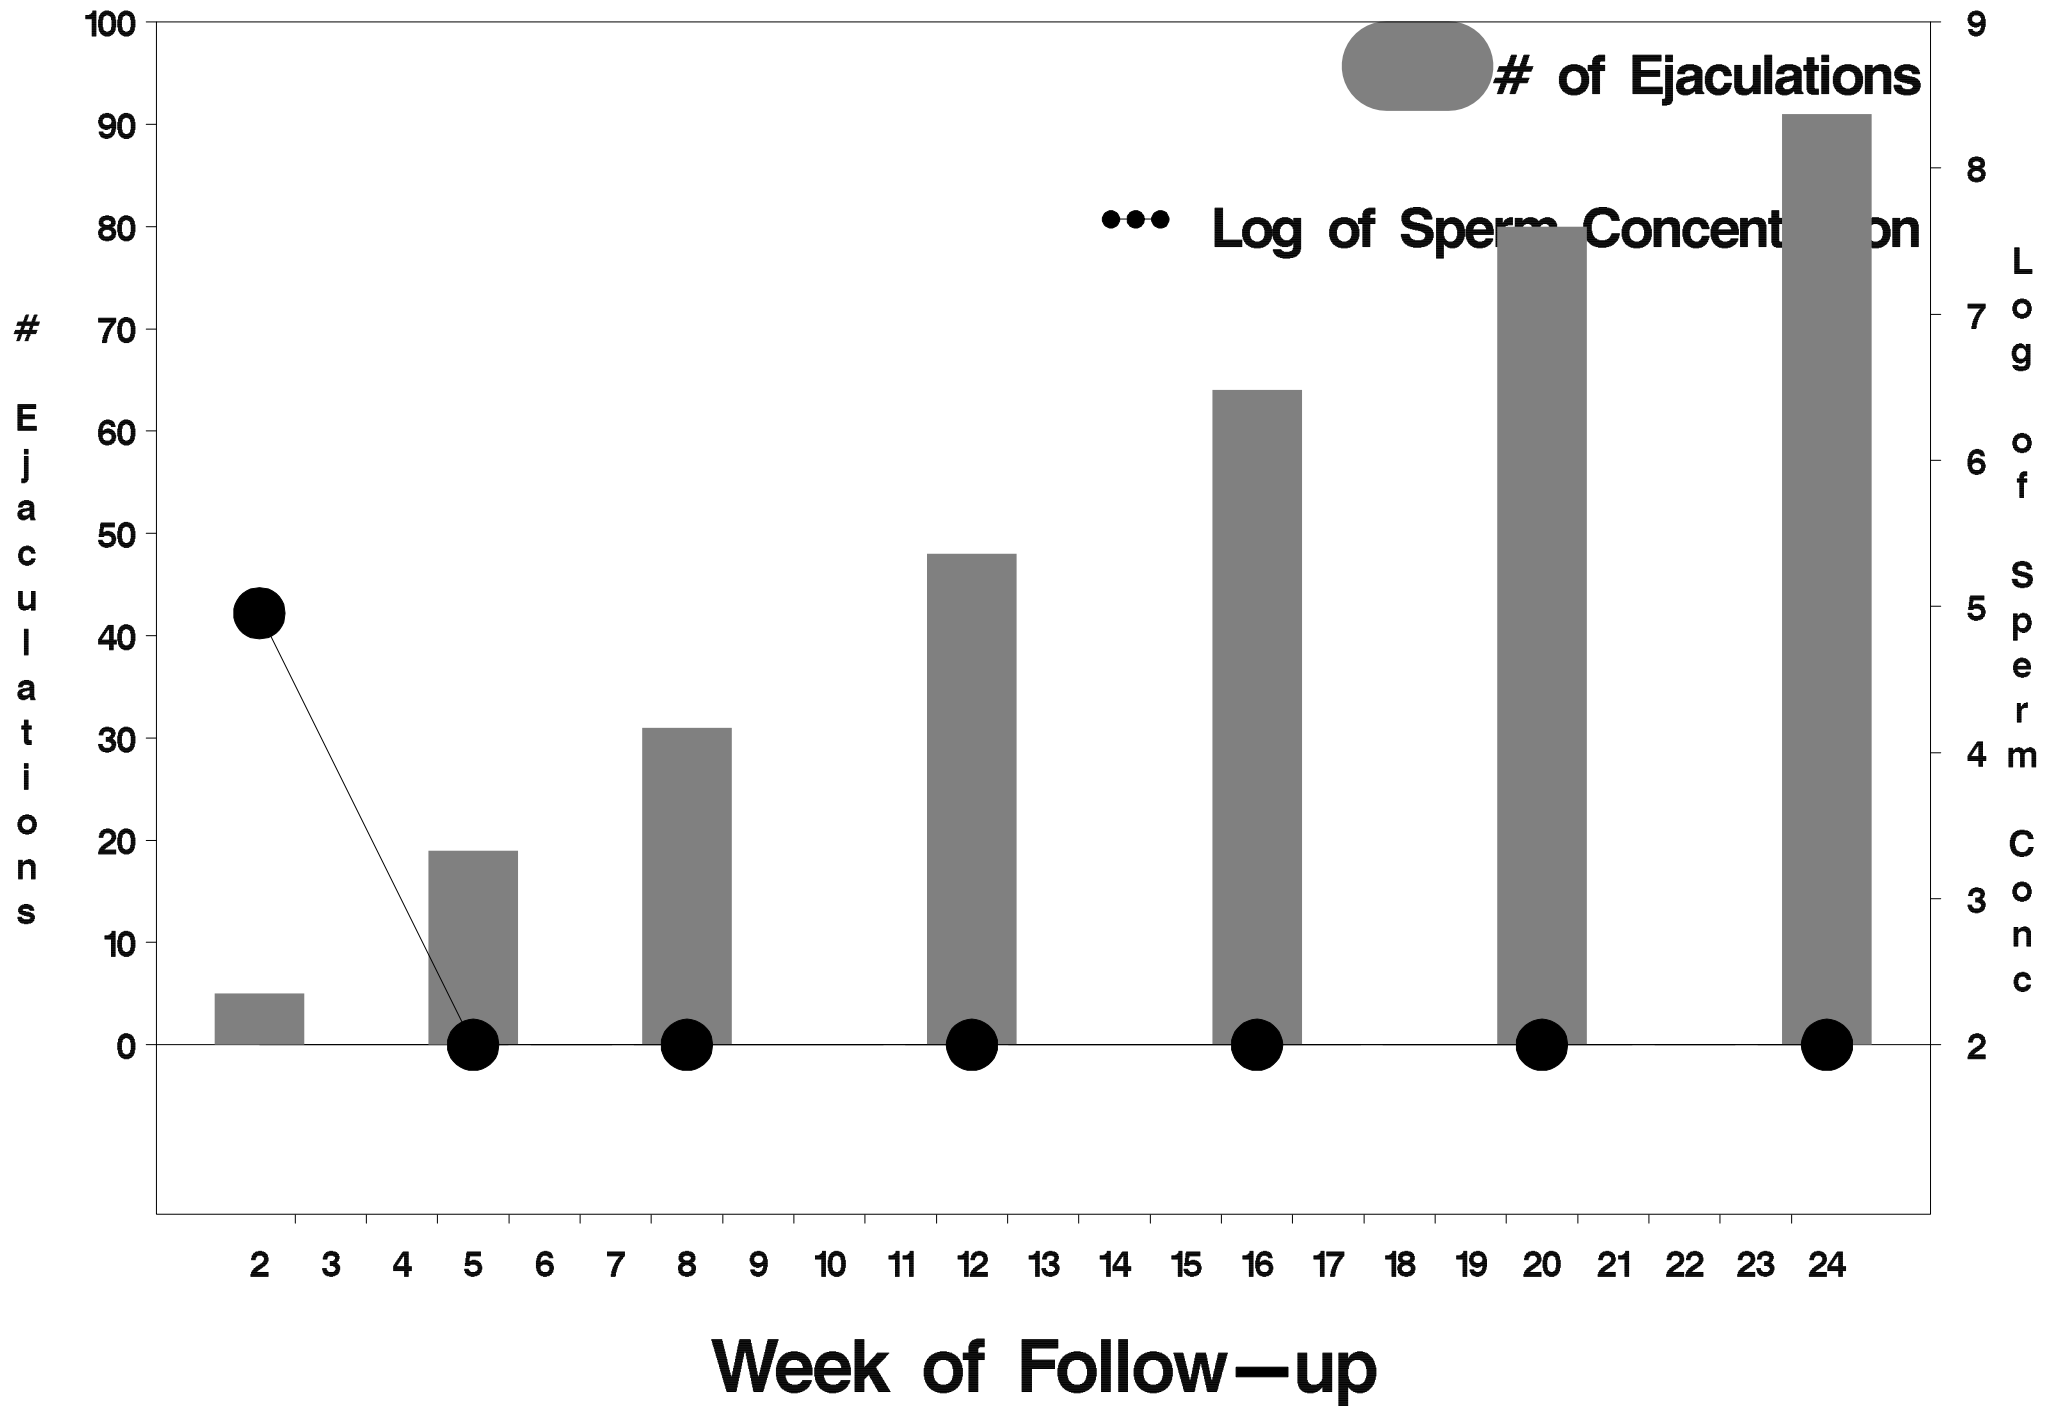

# Participant number= 540

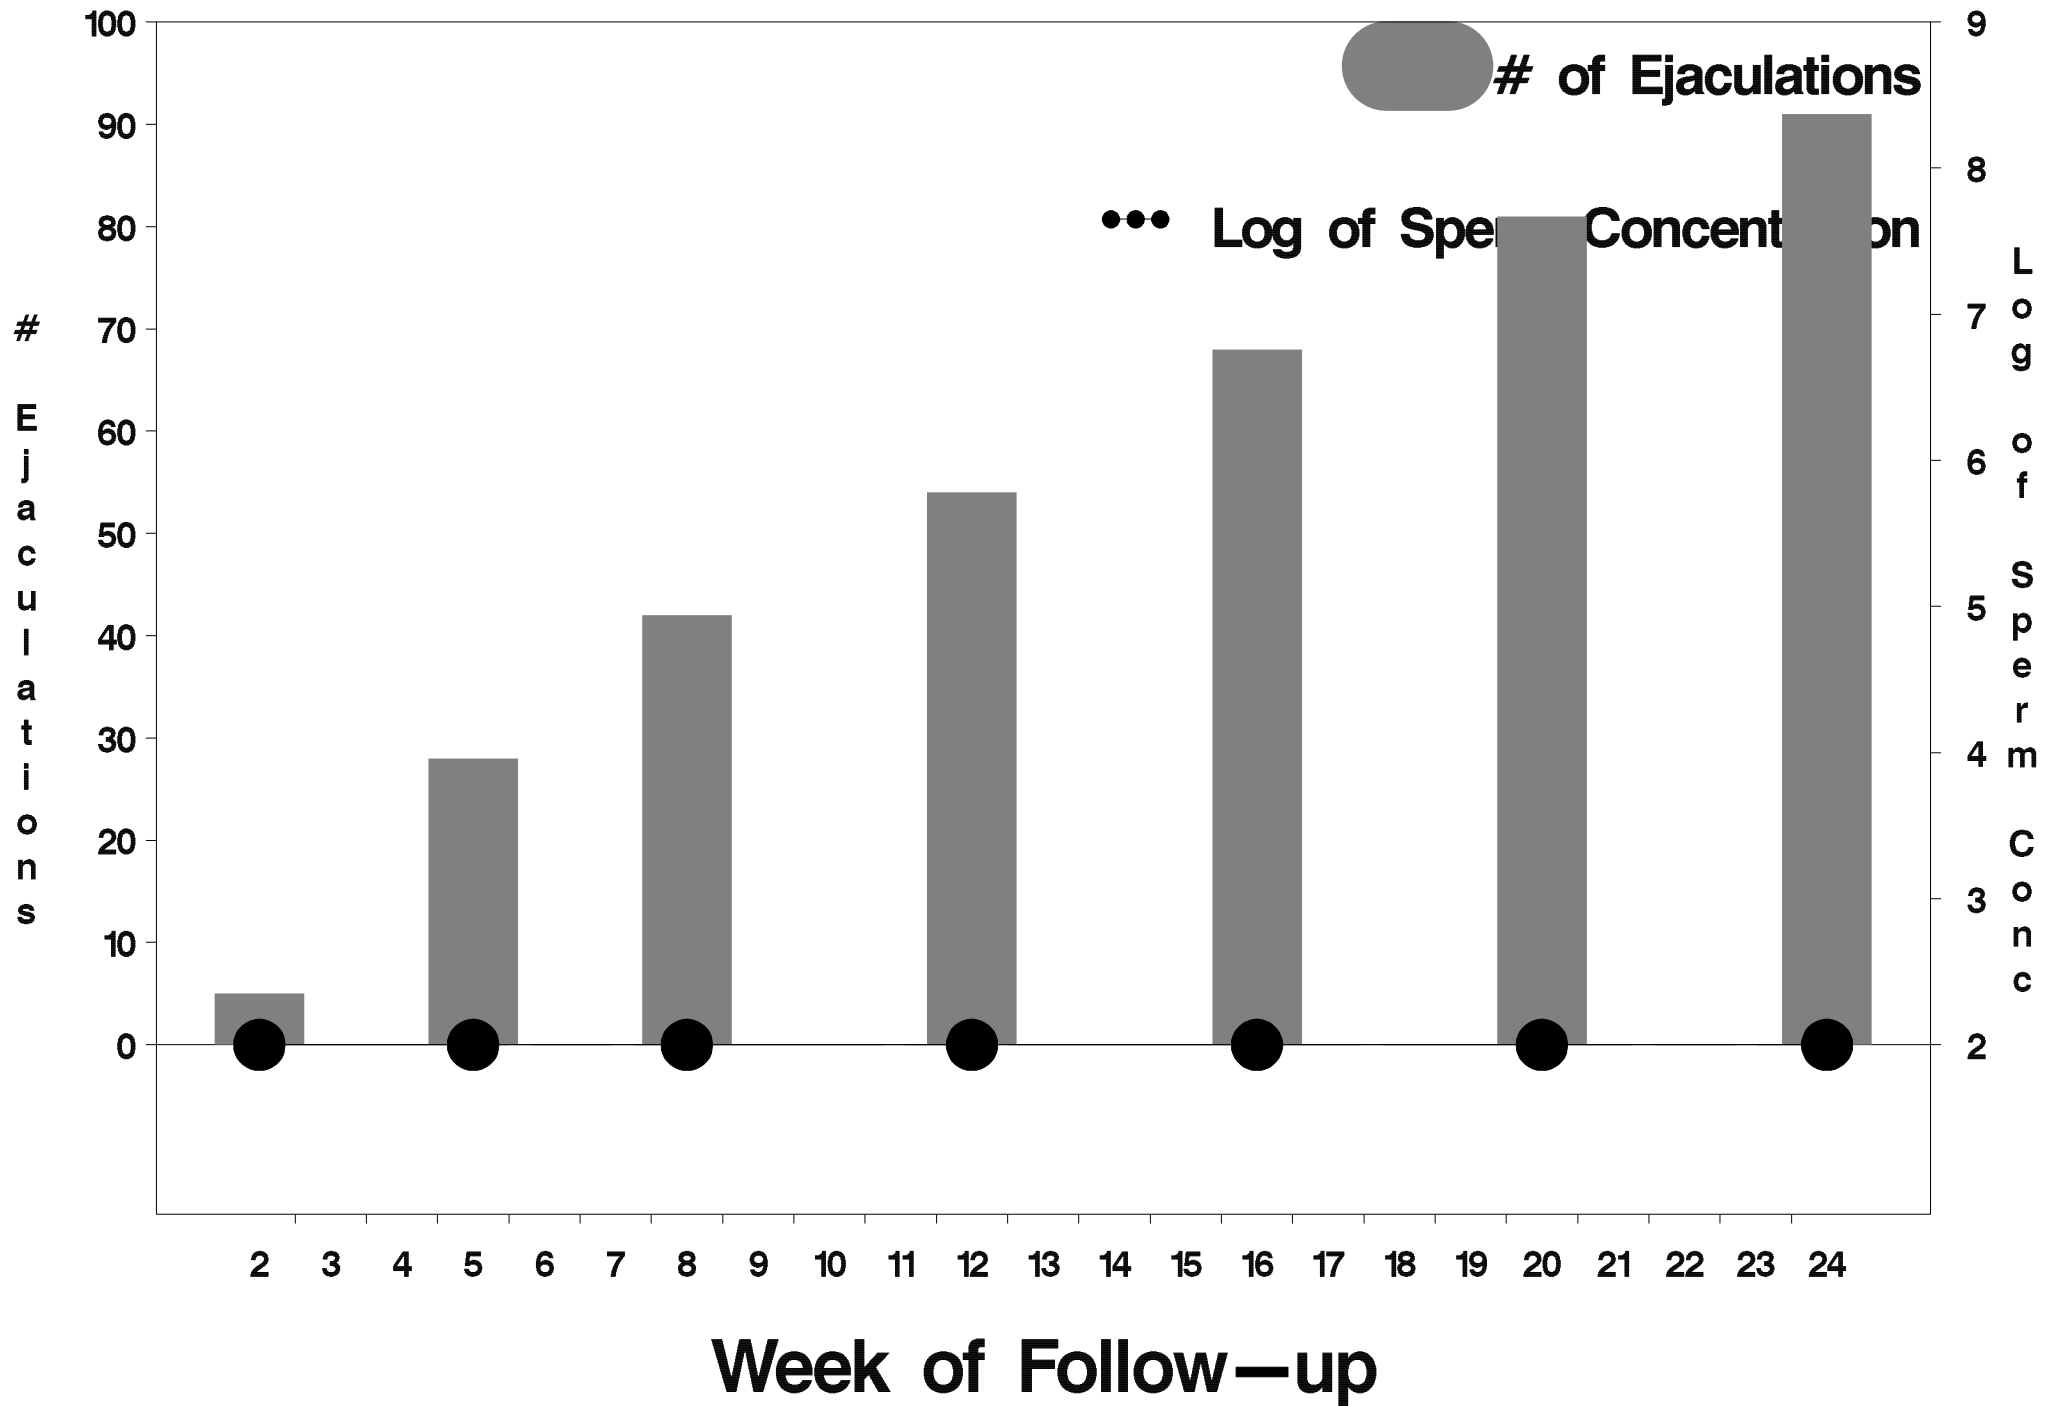

# Participant number= 541

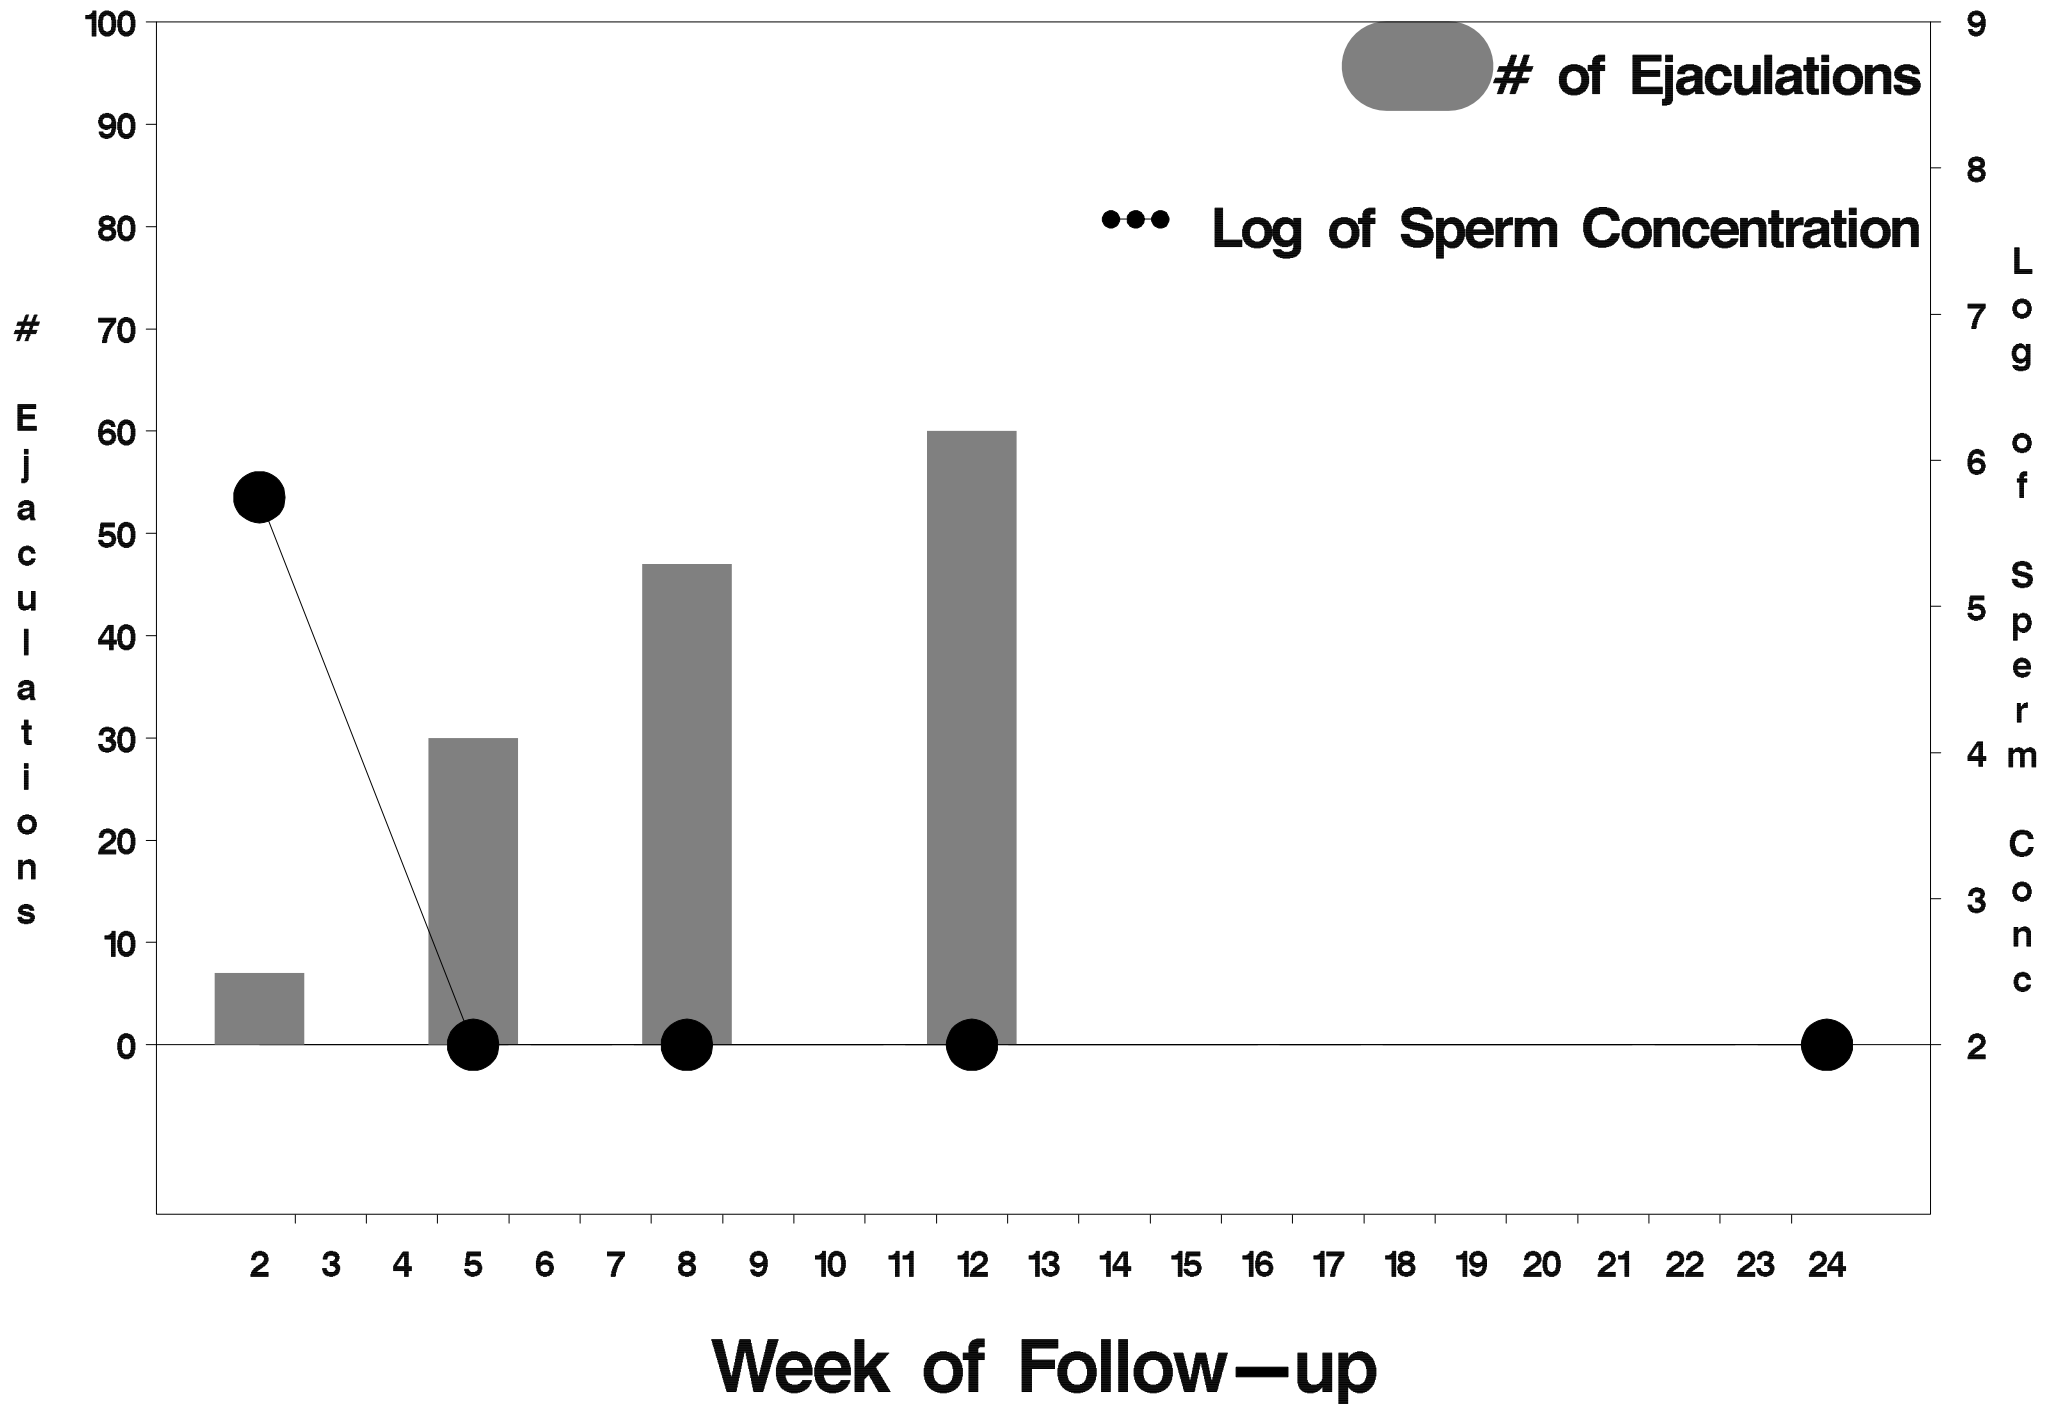

# Participant number= 545

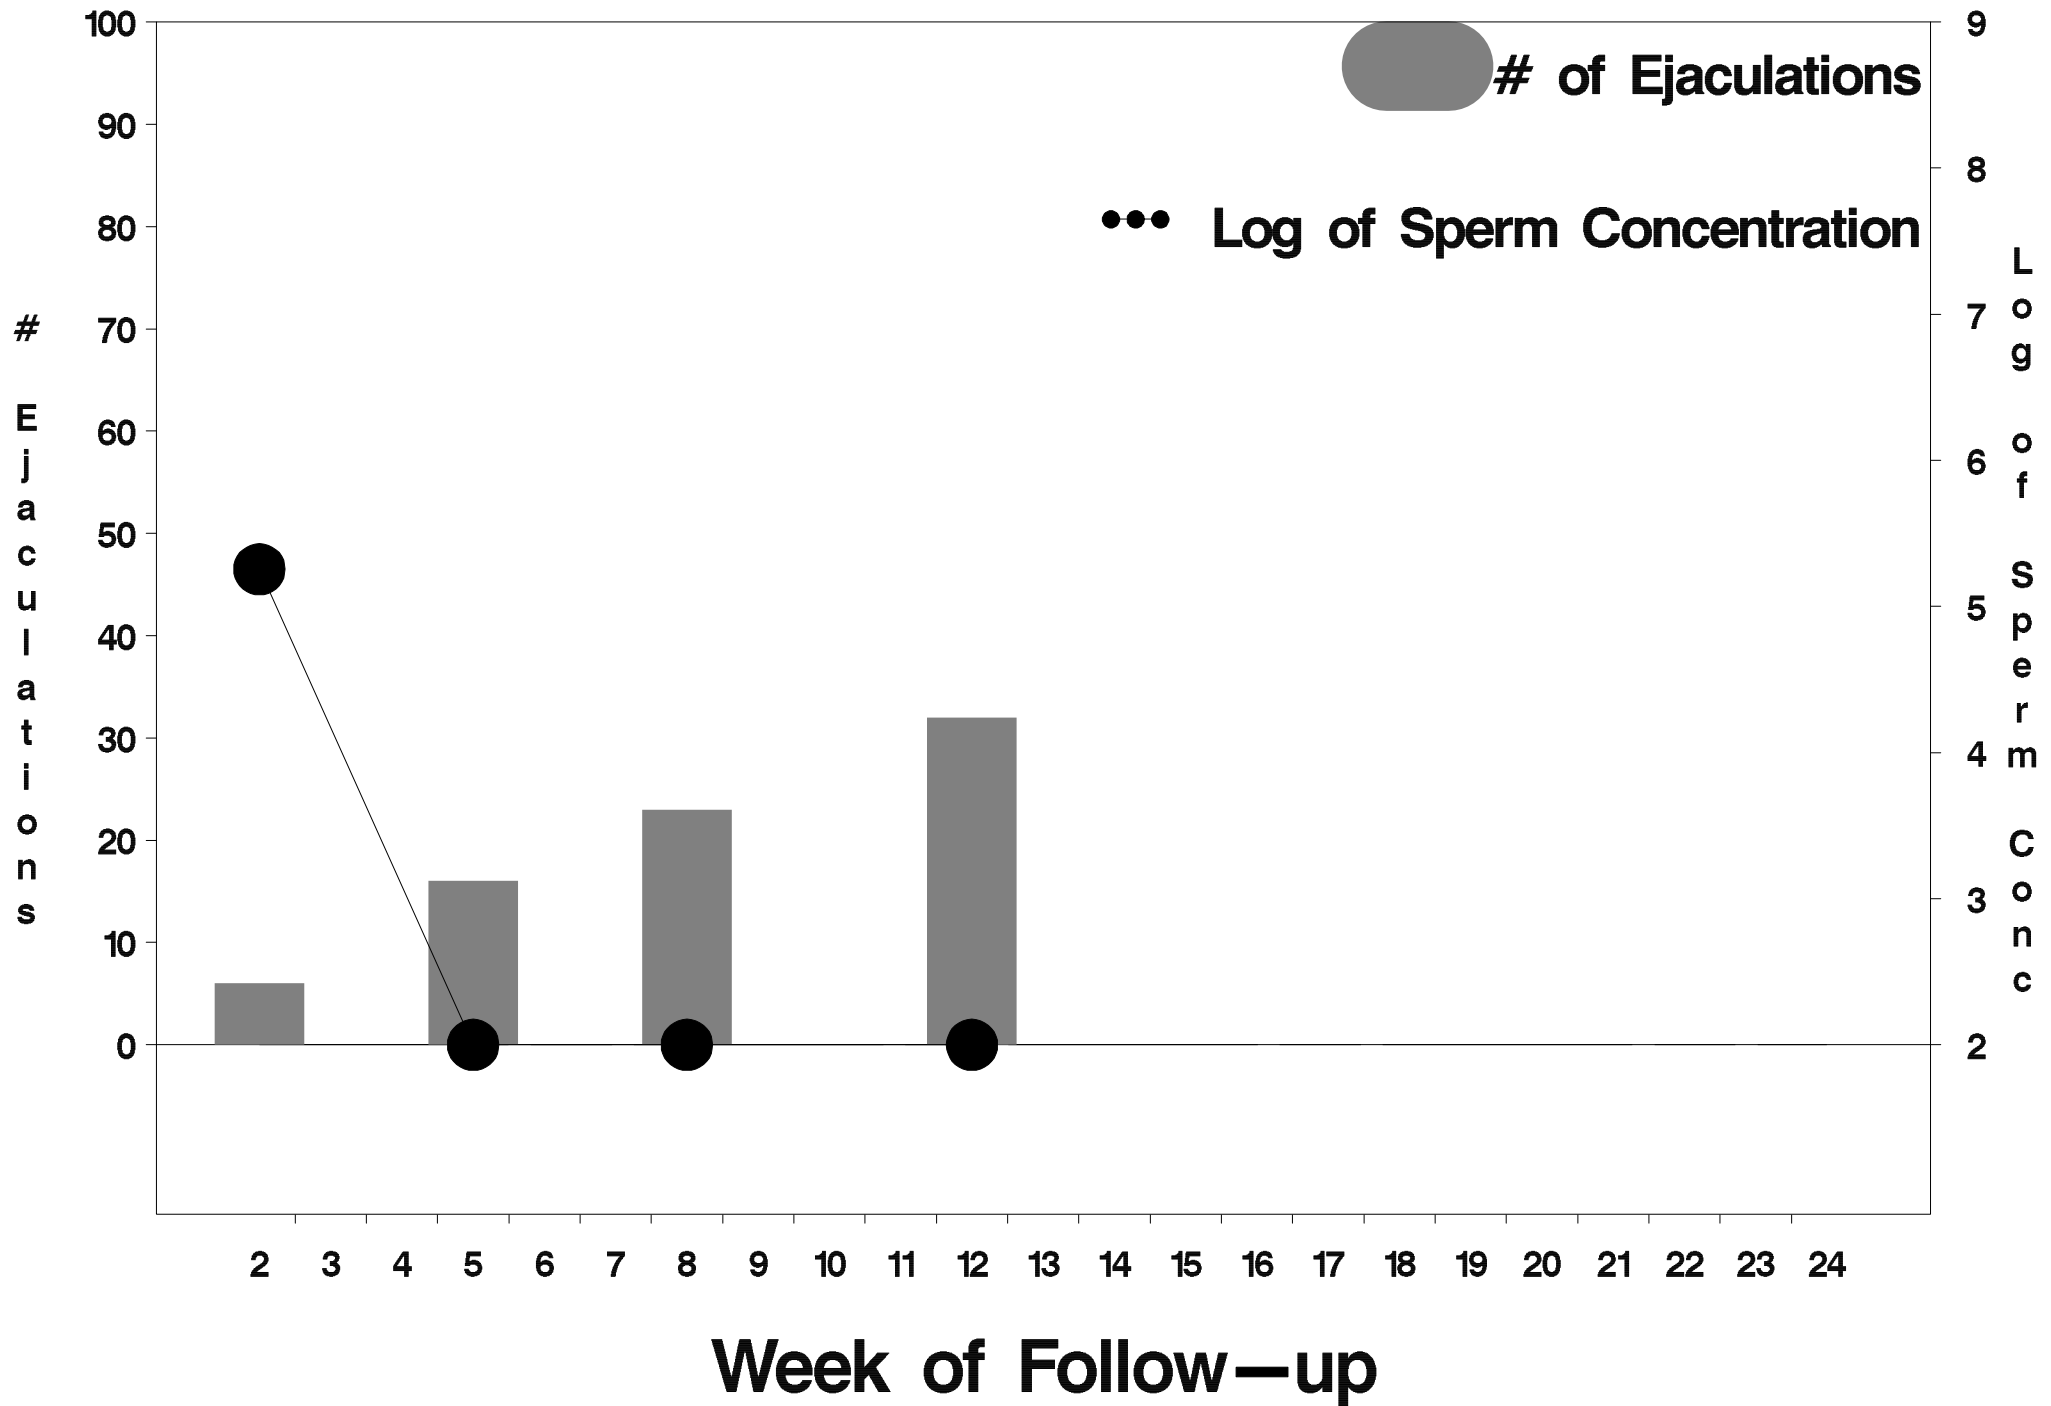

# Participant number= 546

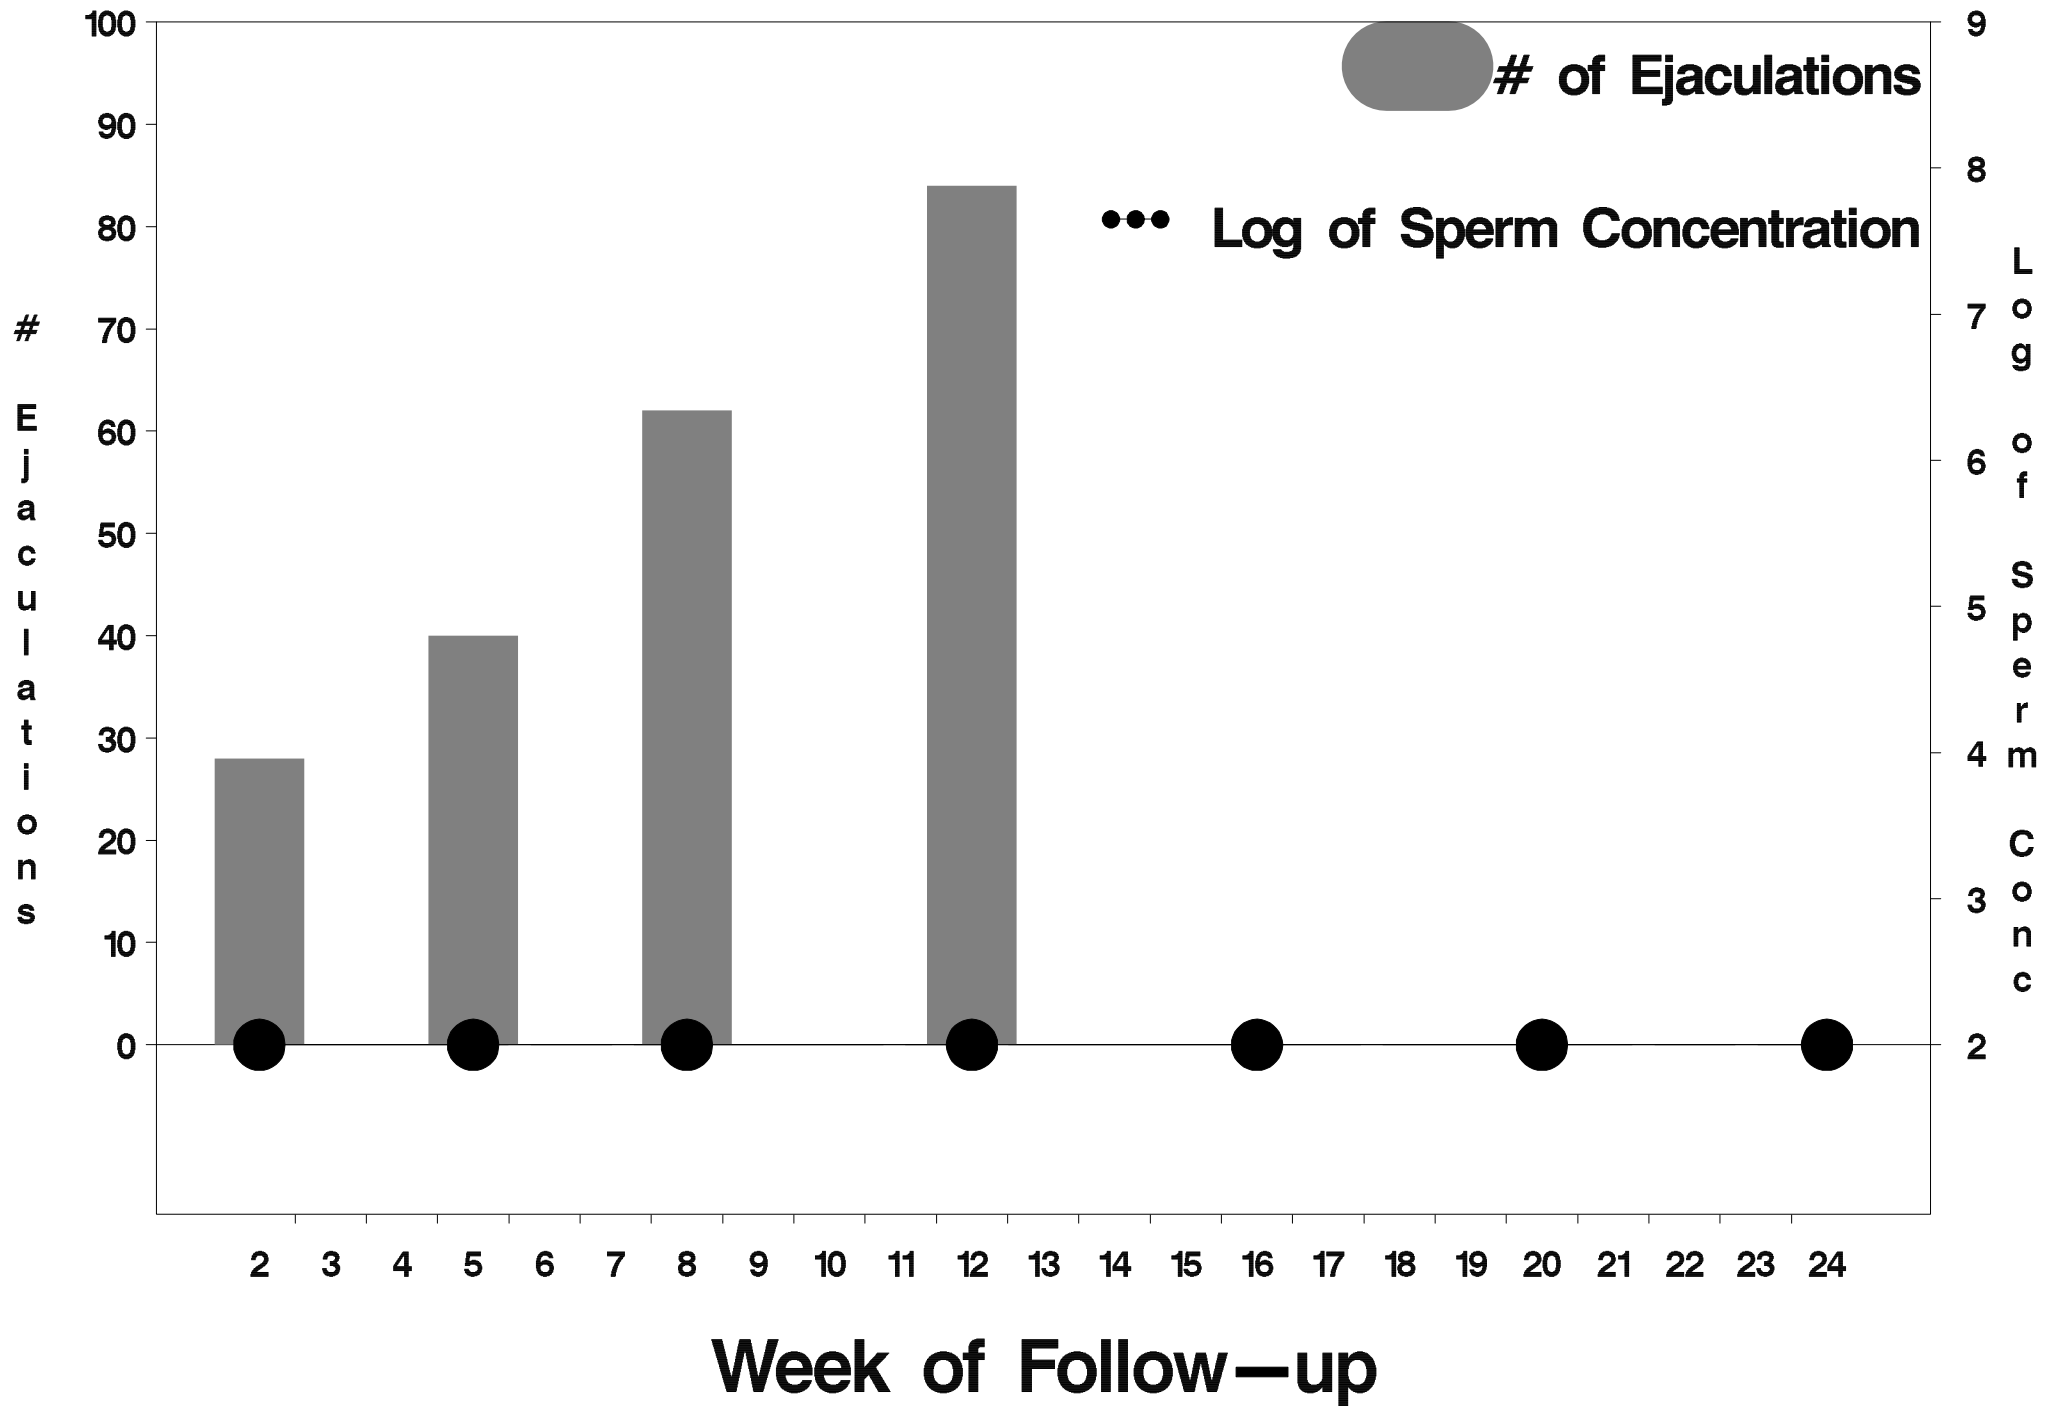



# Participant number= 547

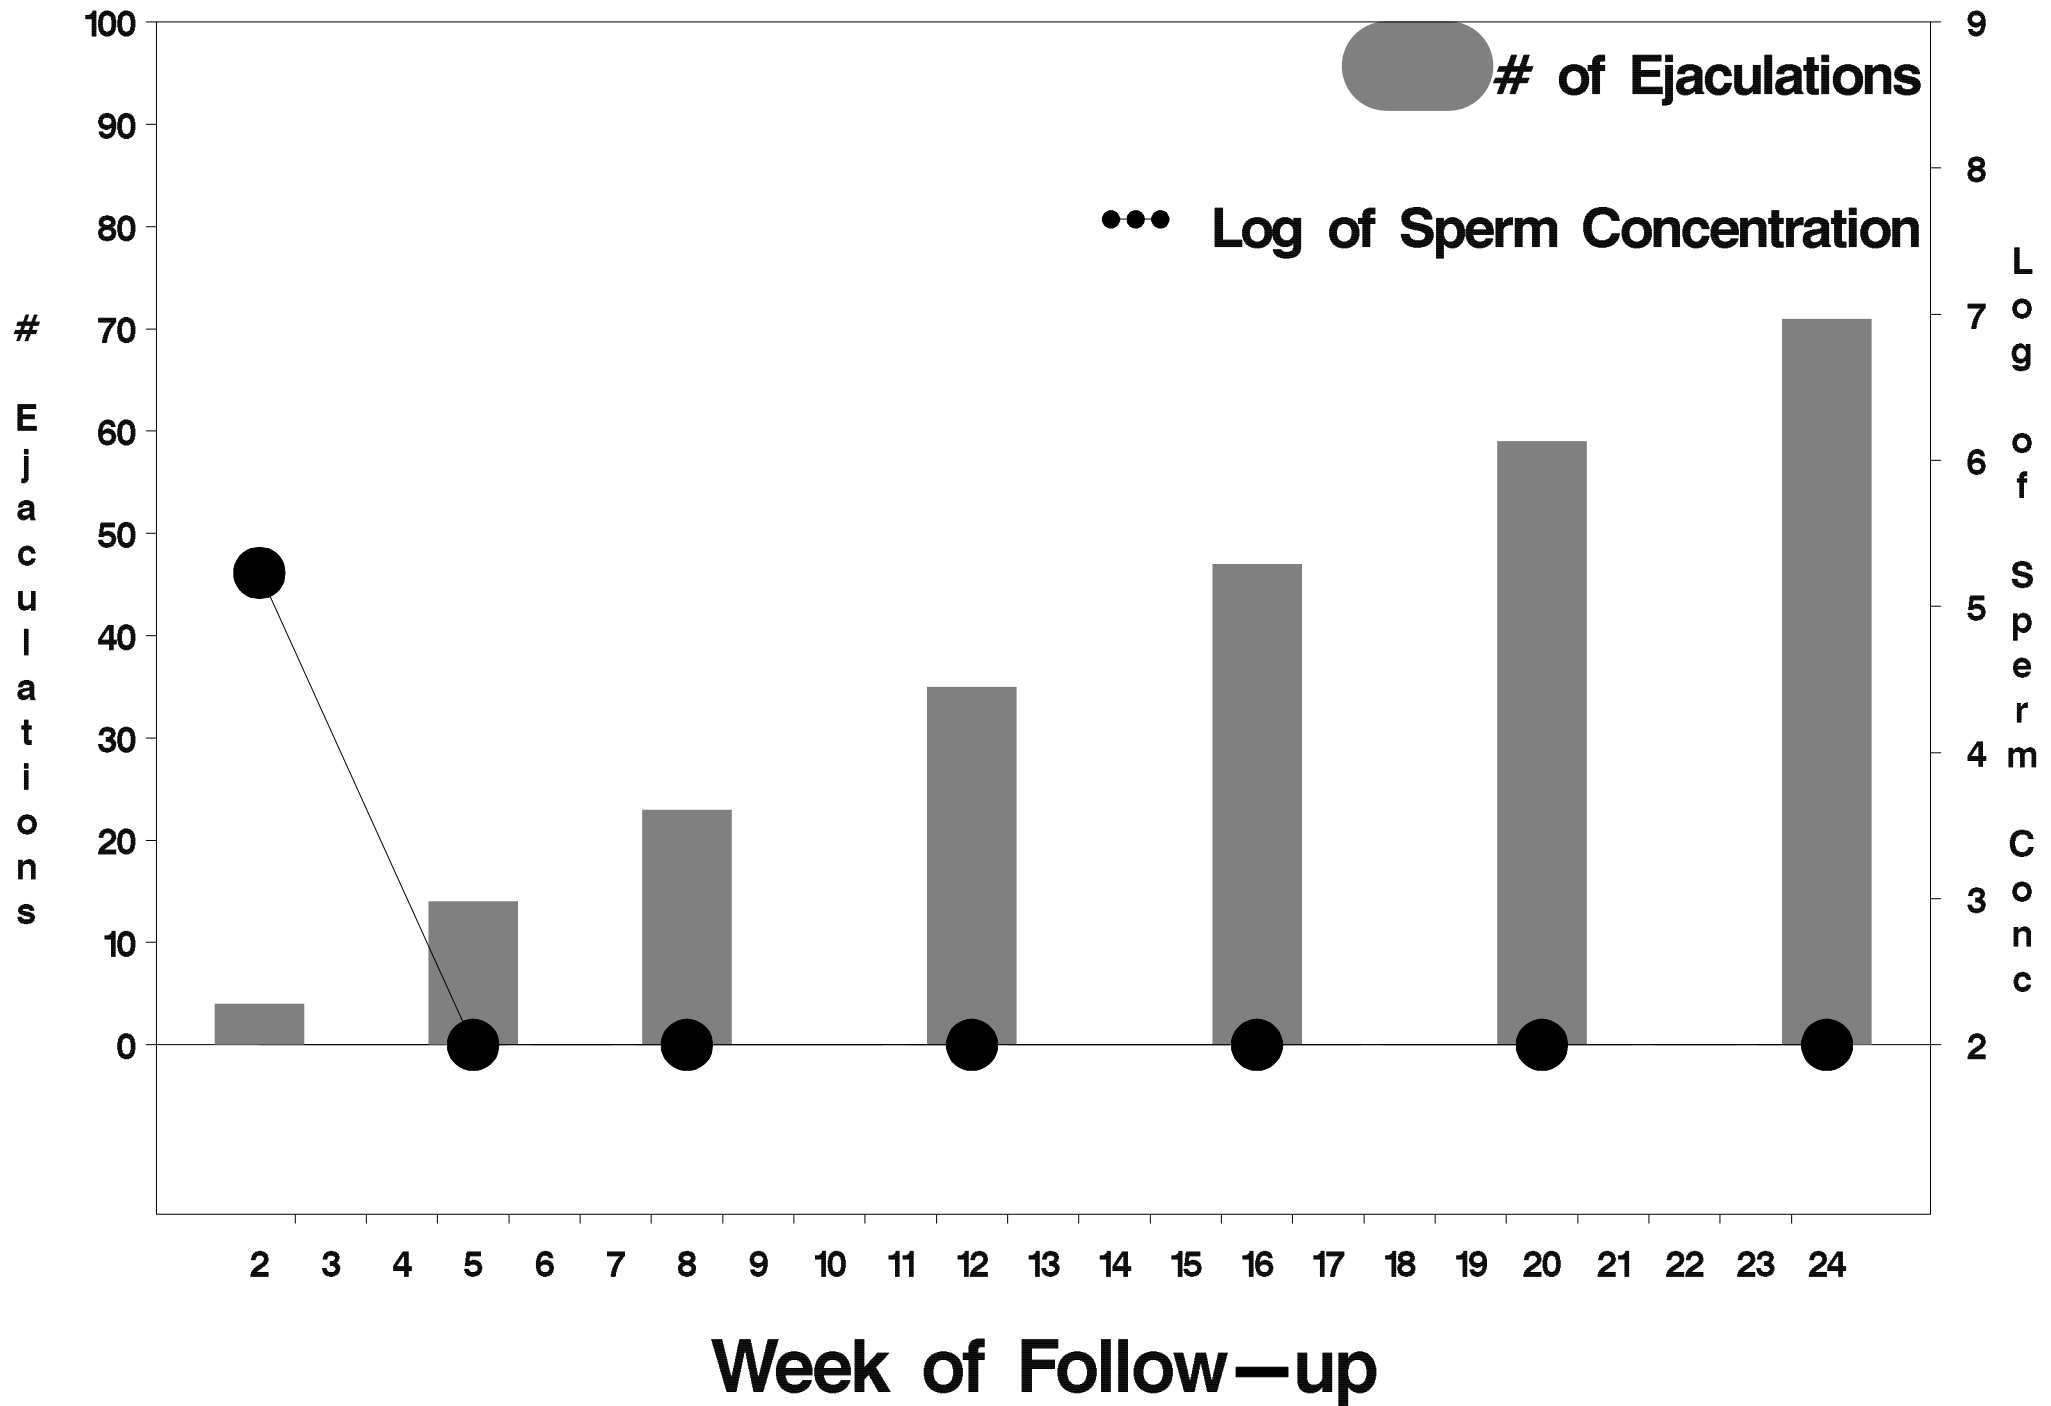

# Participant number= 548

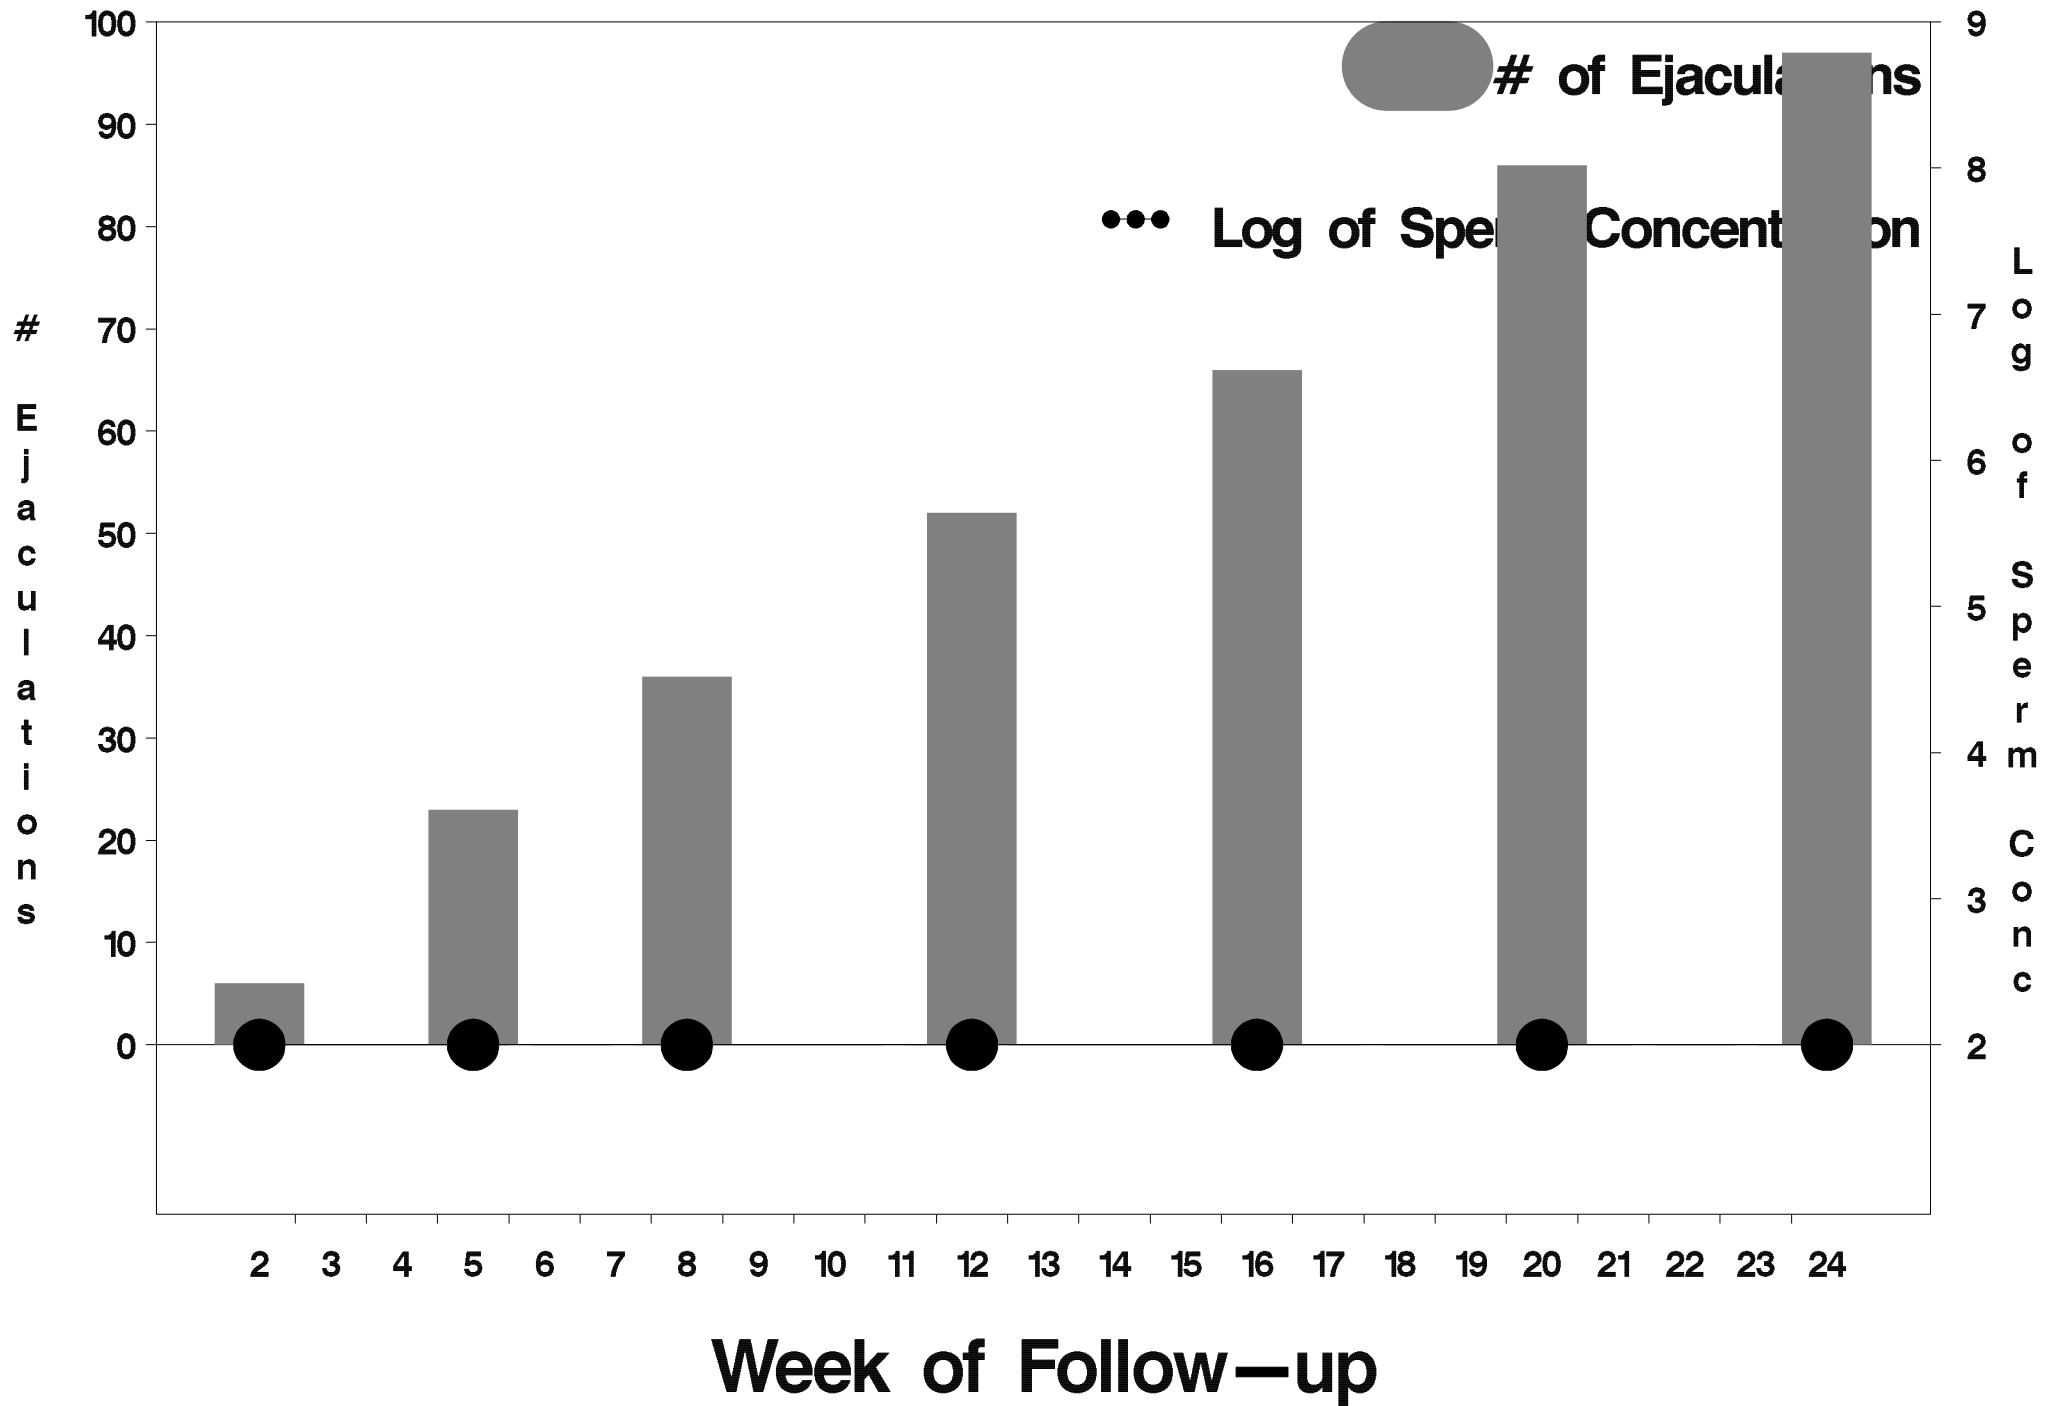

# Participant number= 549

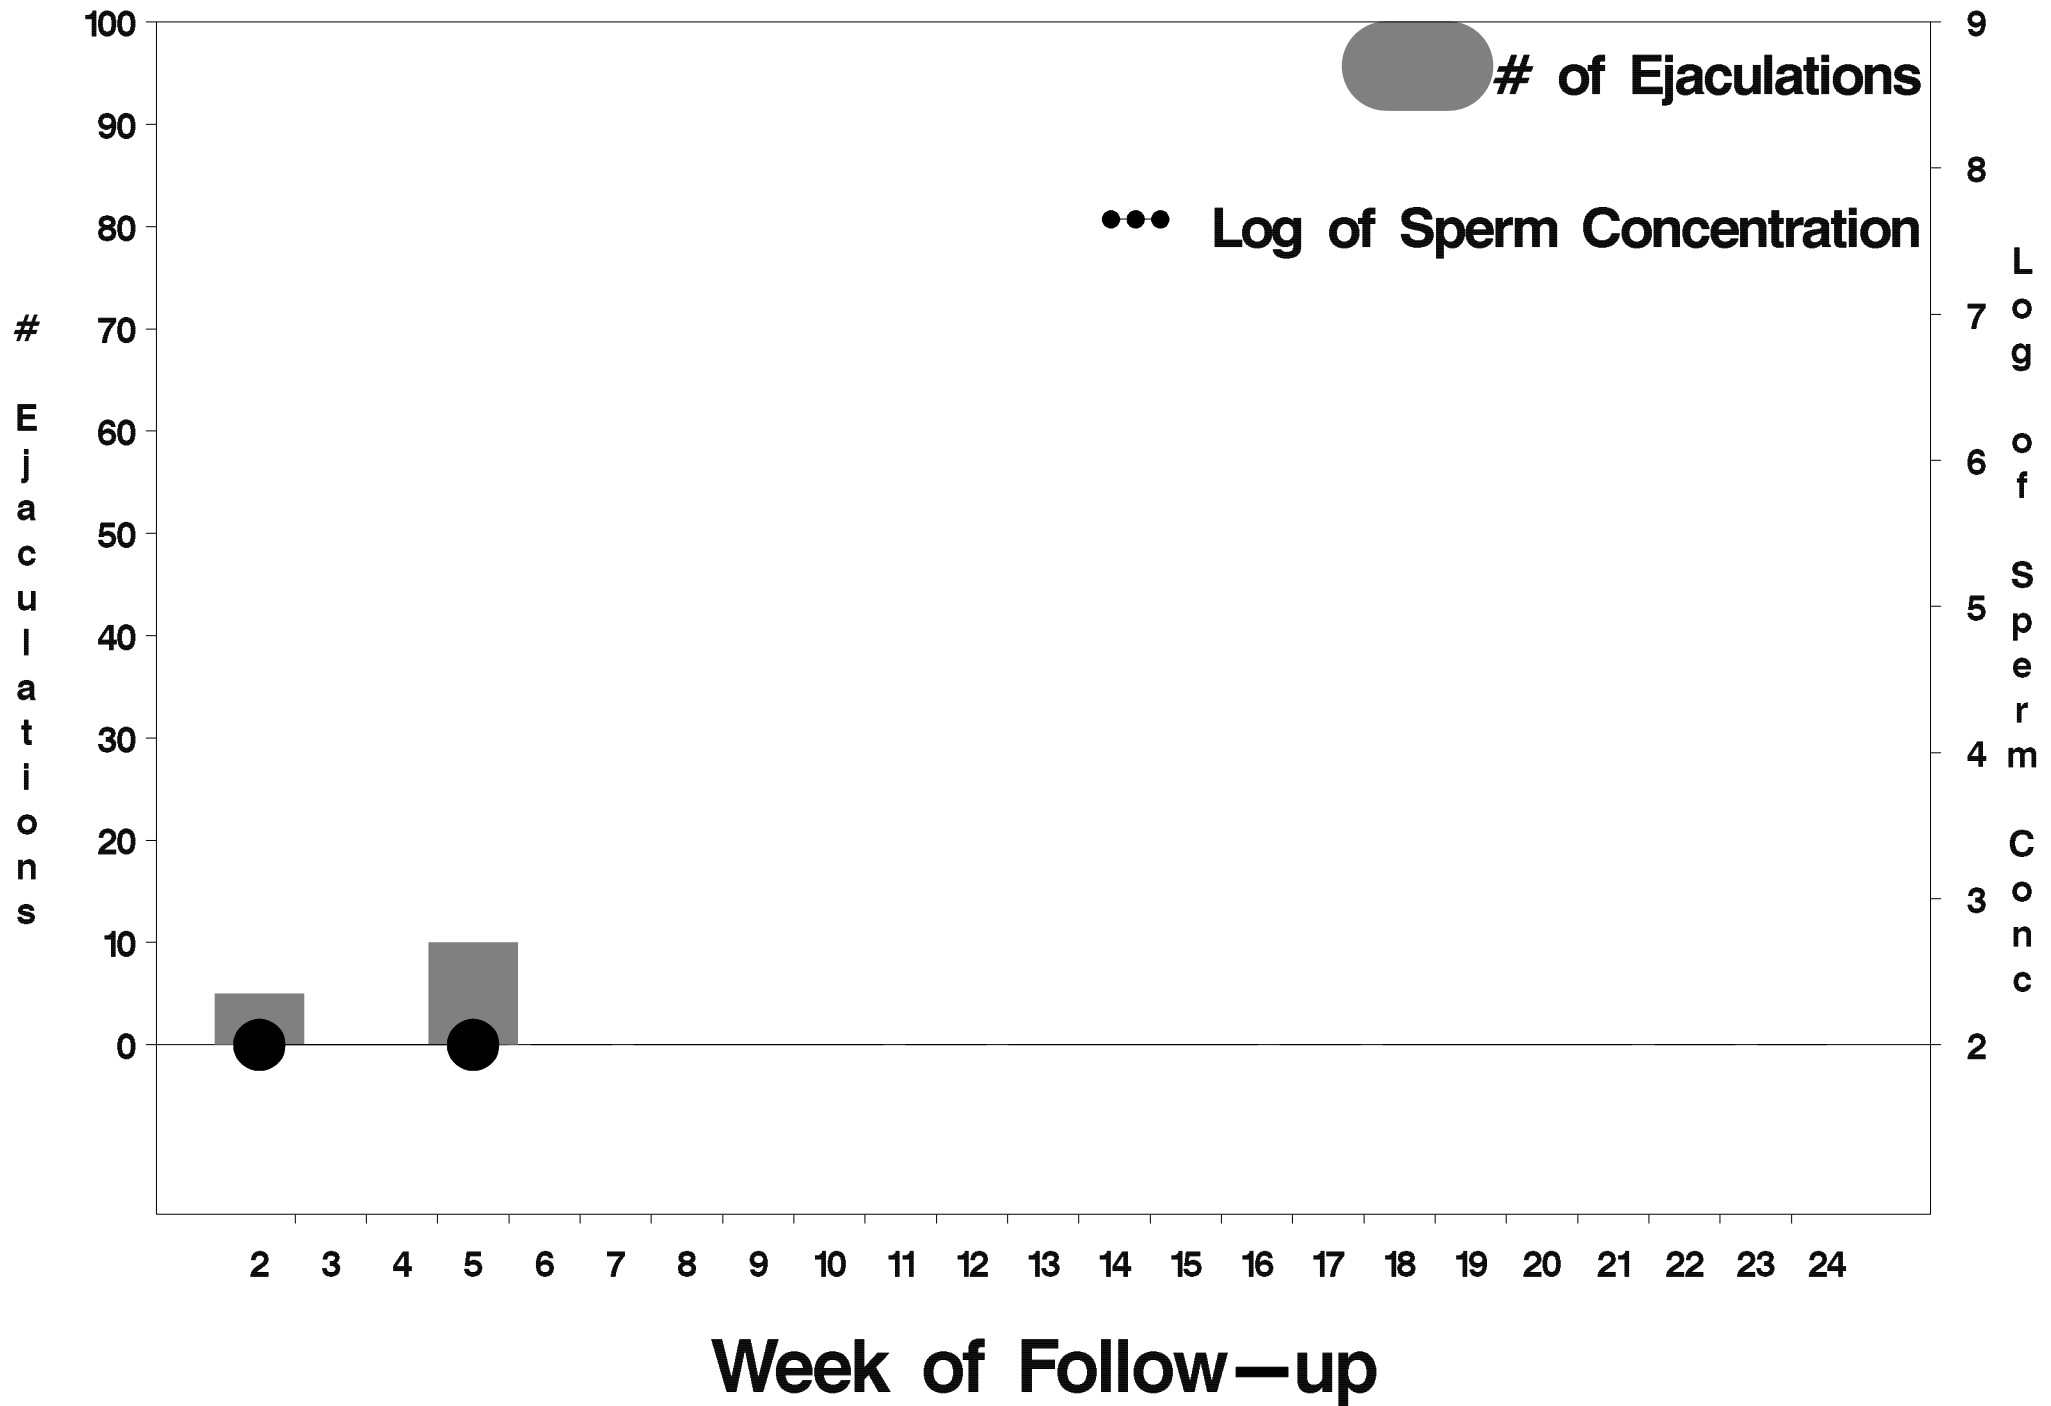

# Participant number= 550

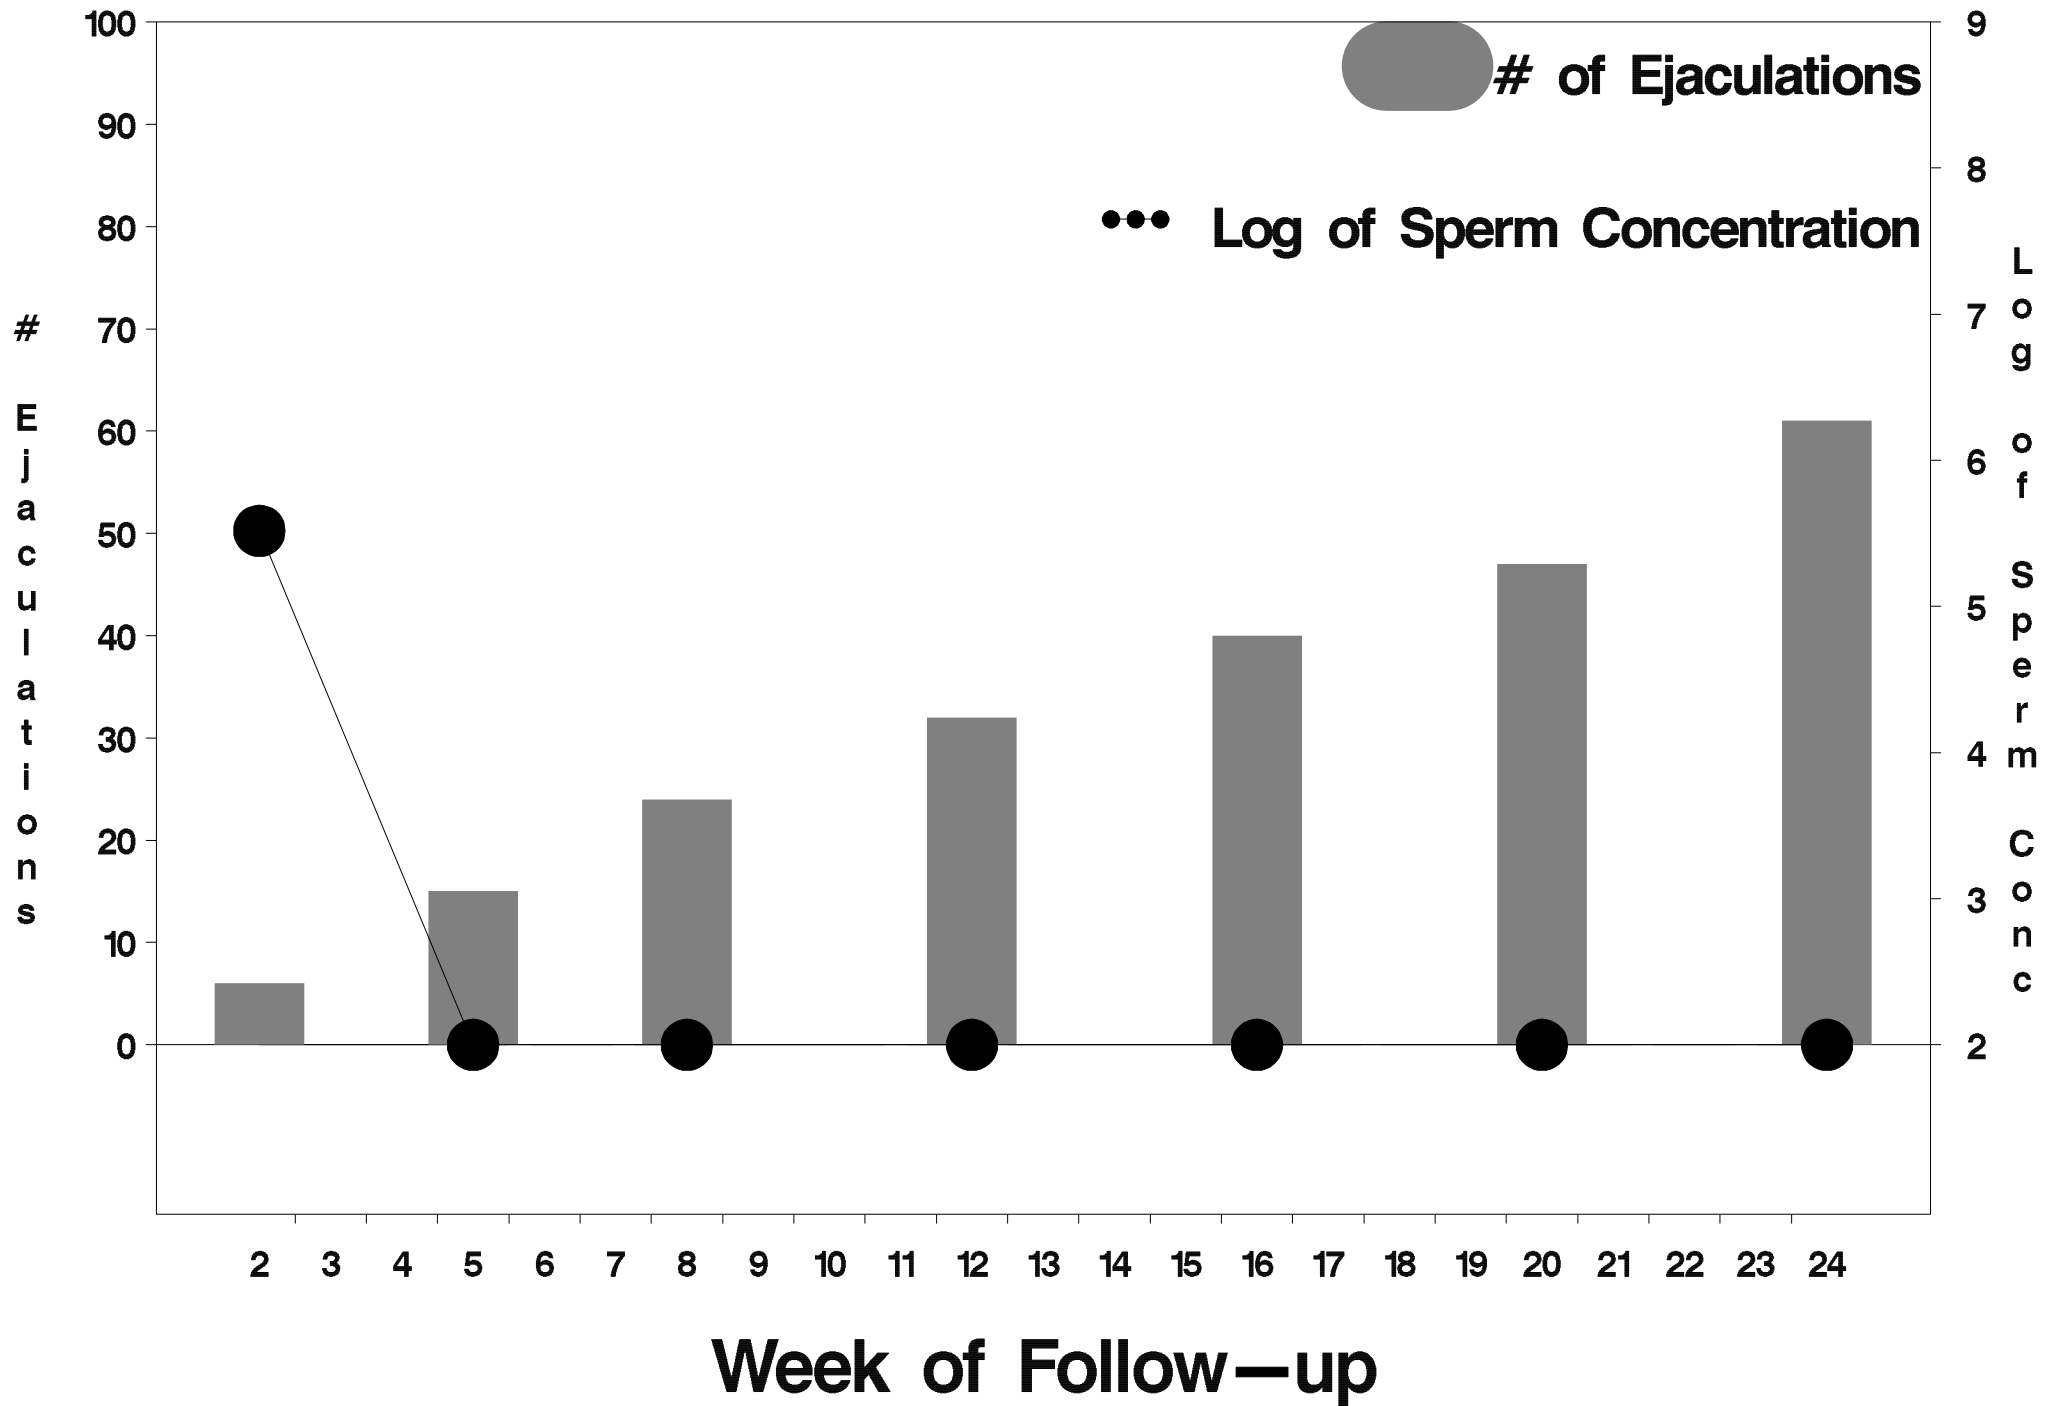

# Participant number= 551

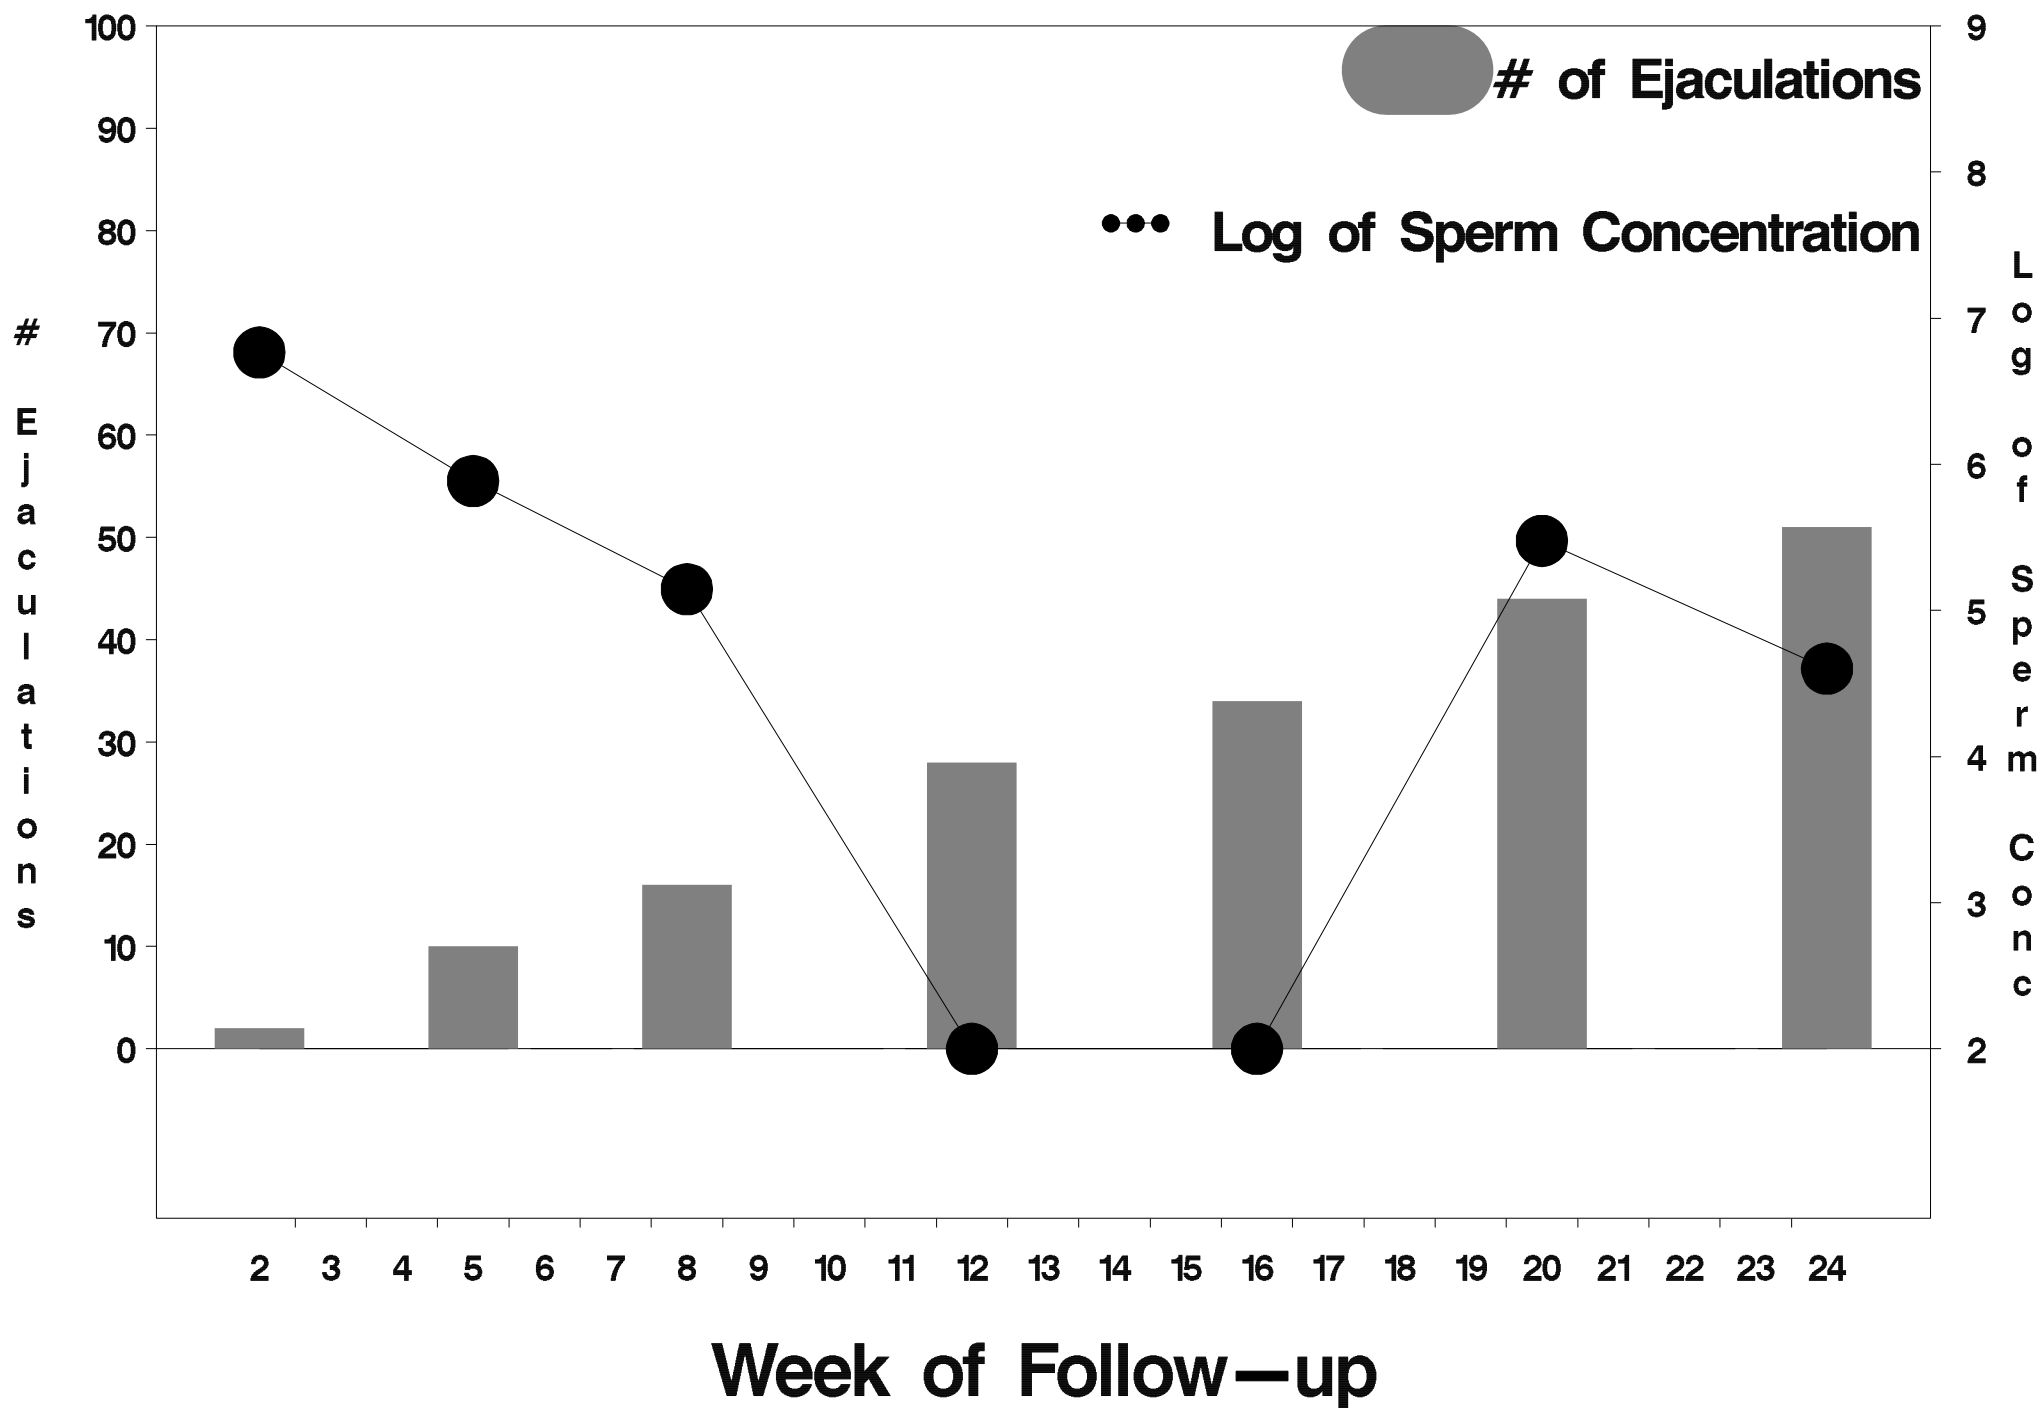



# Participant number= 553

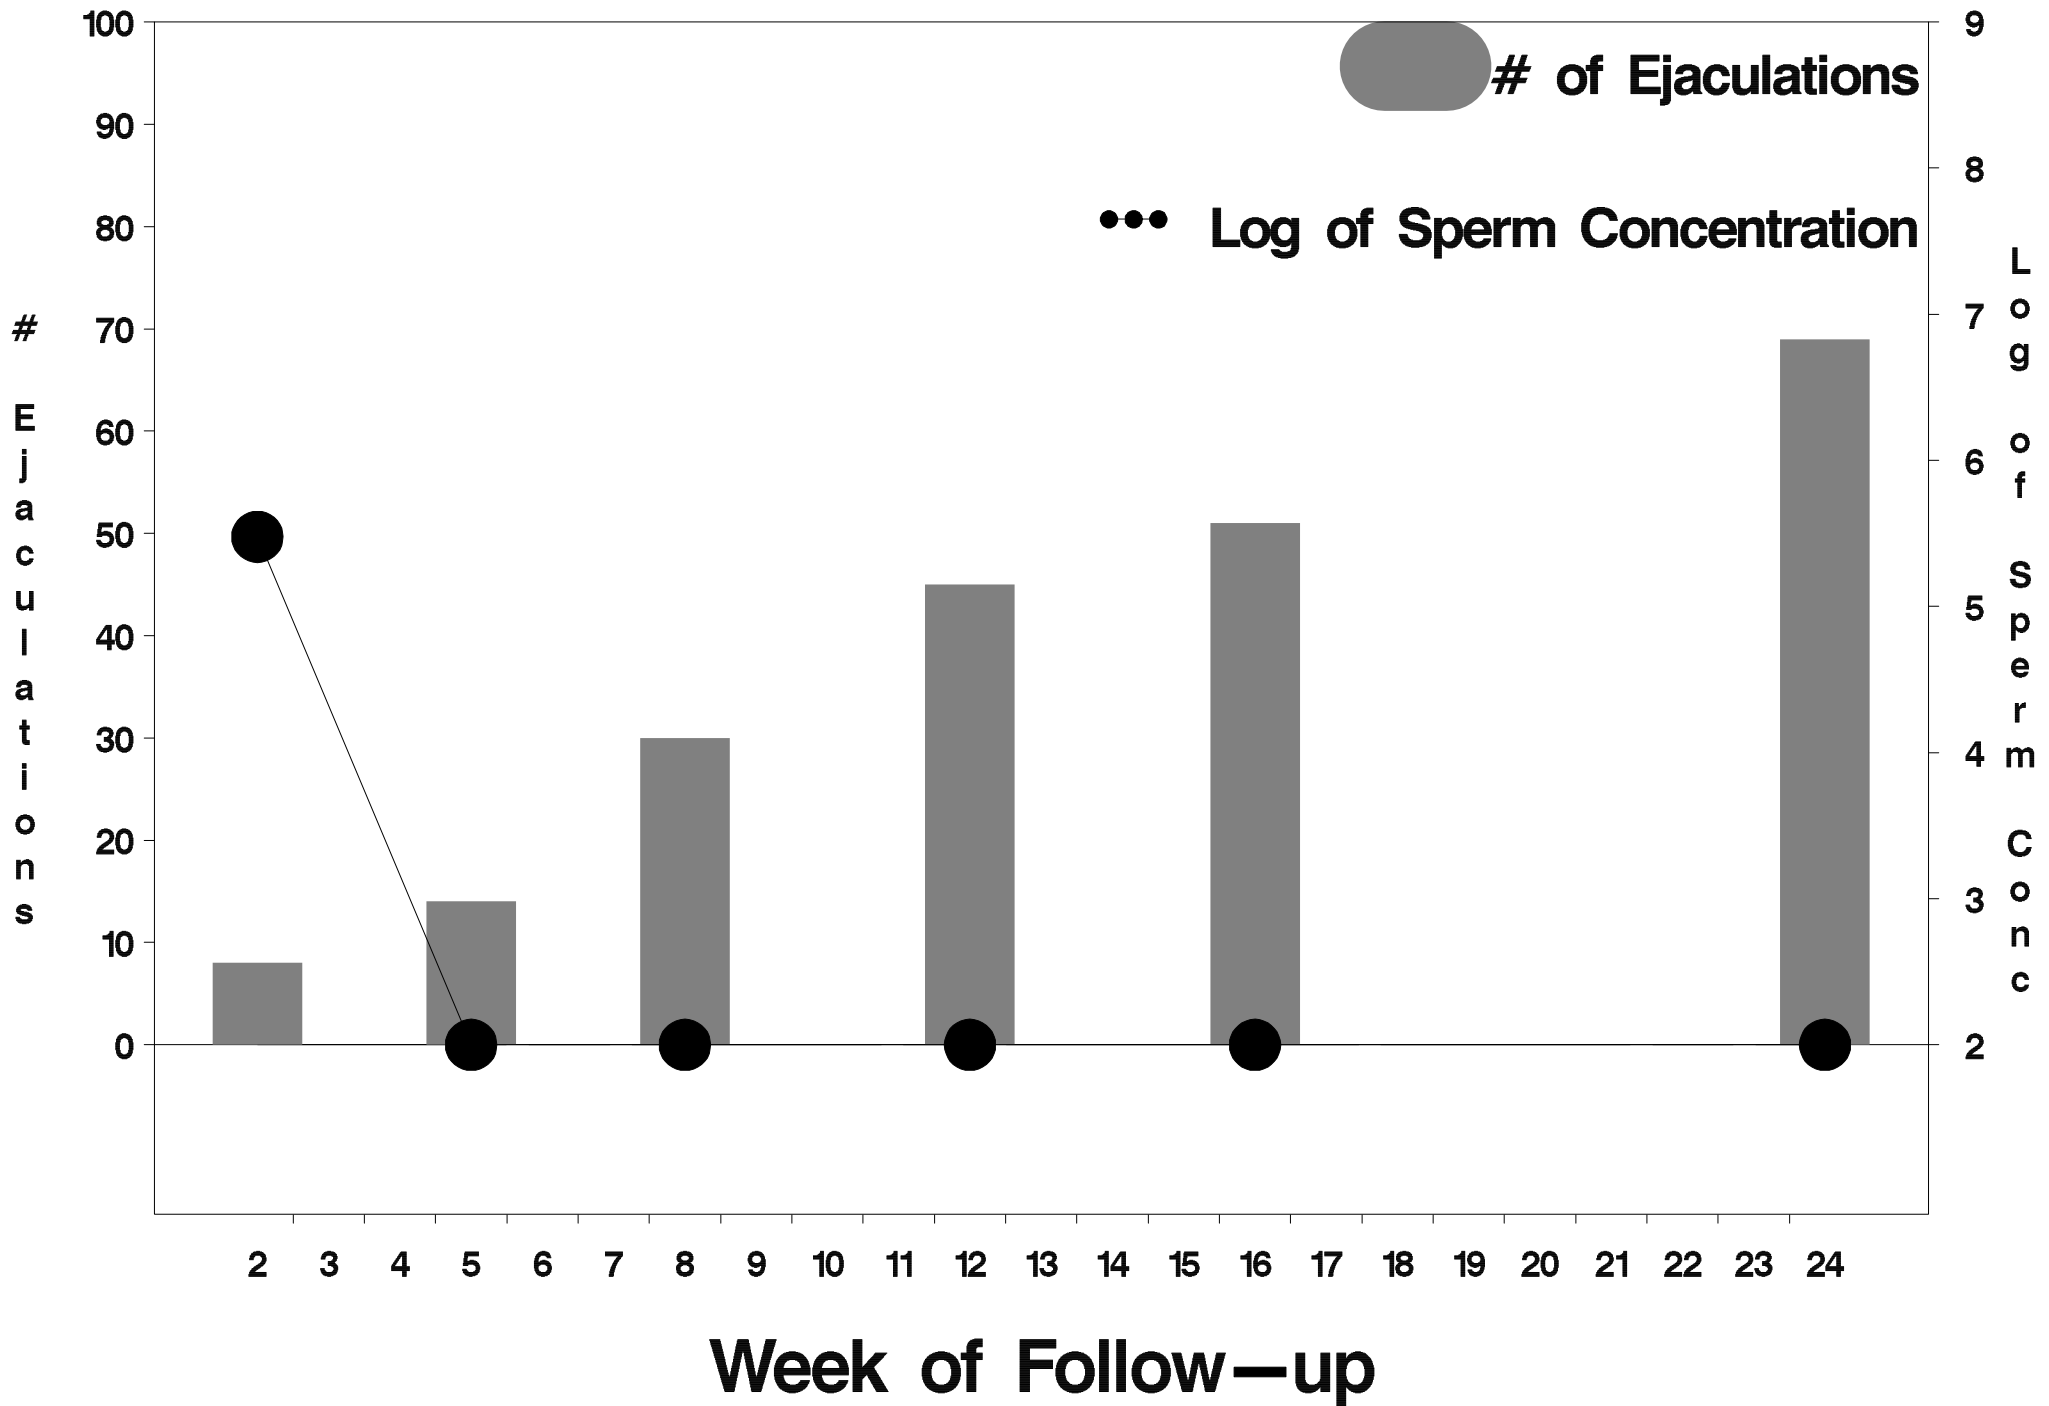

# Participant number= 554

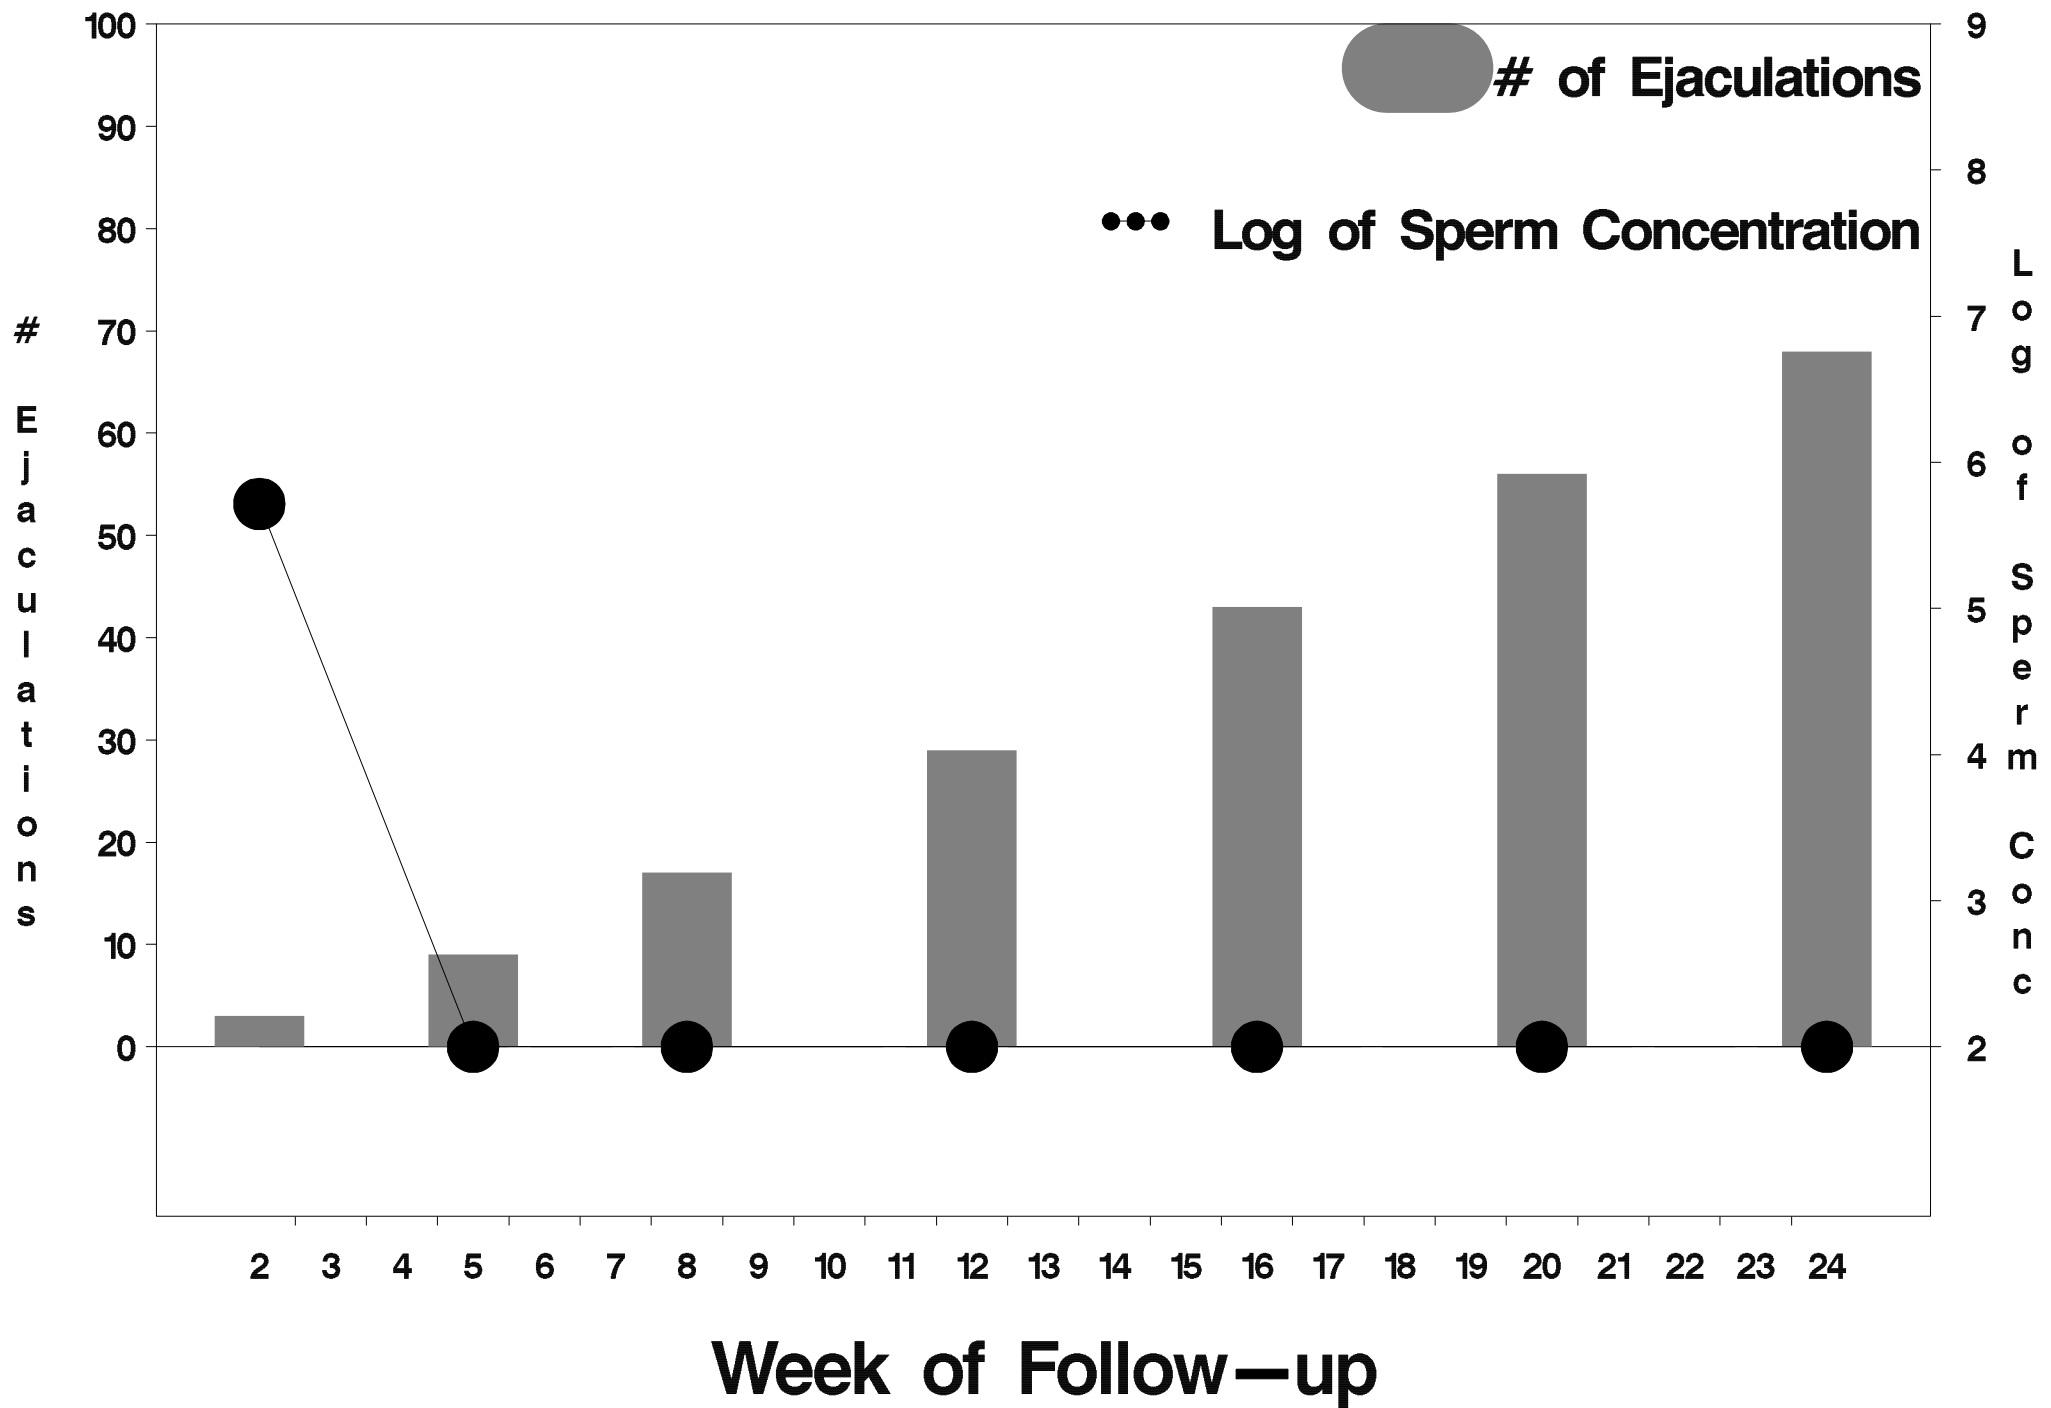



# Participant number= 555

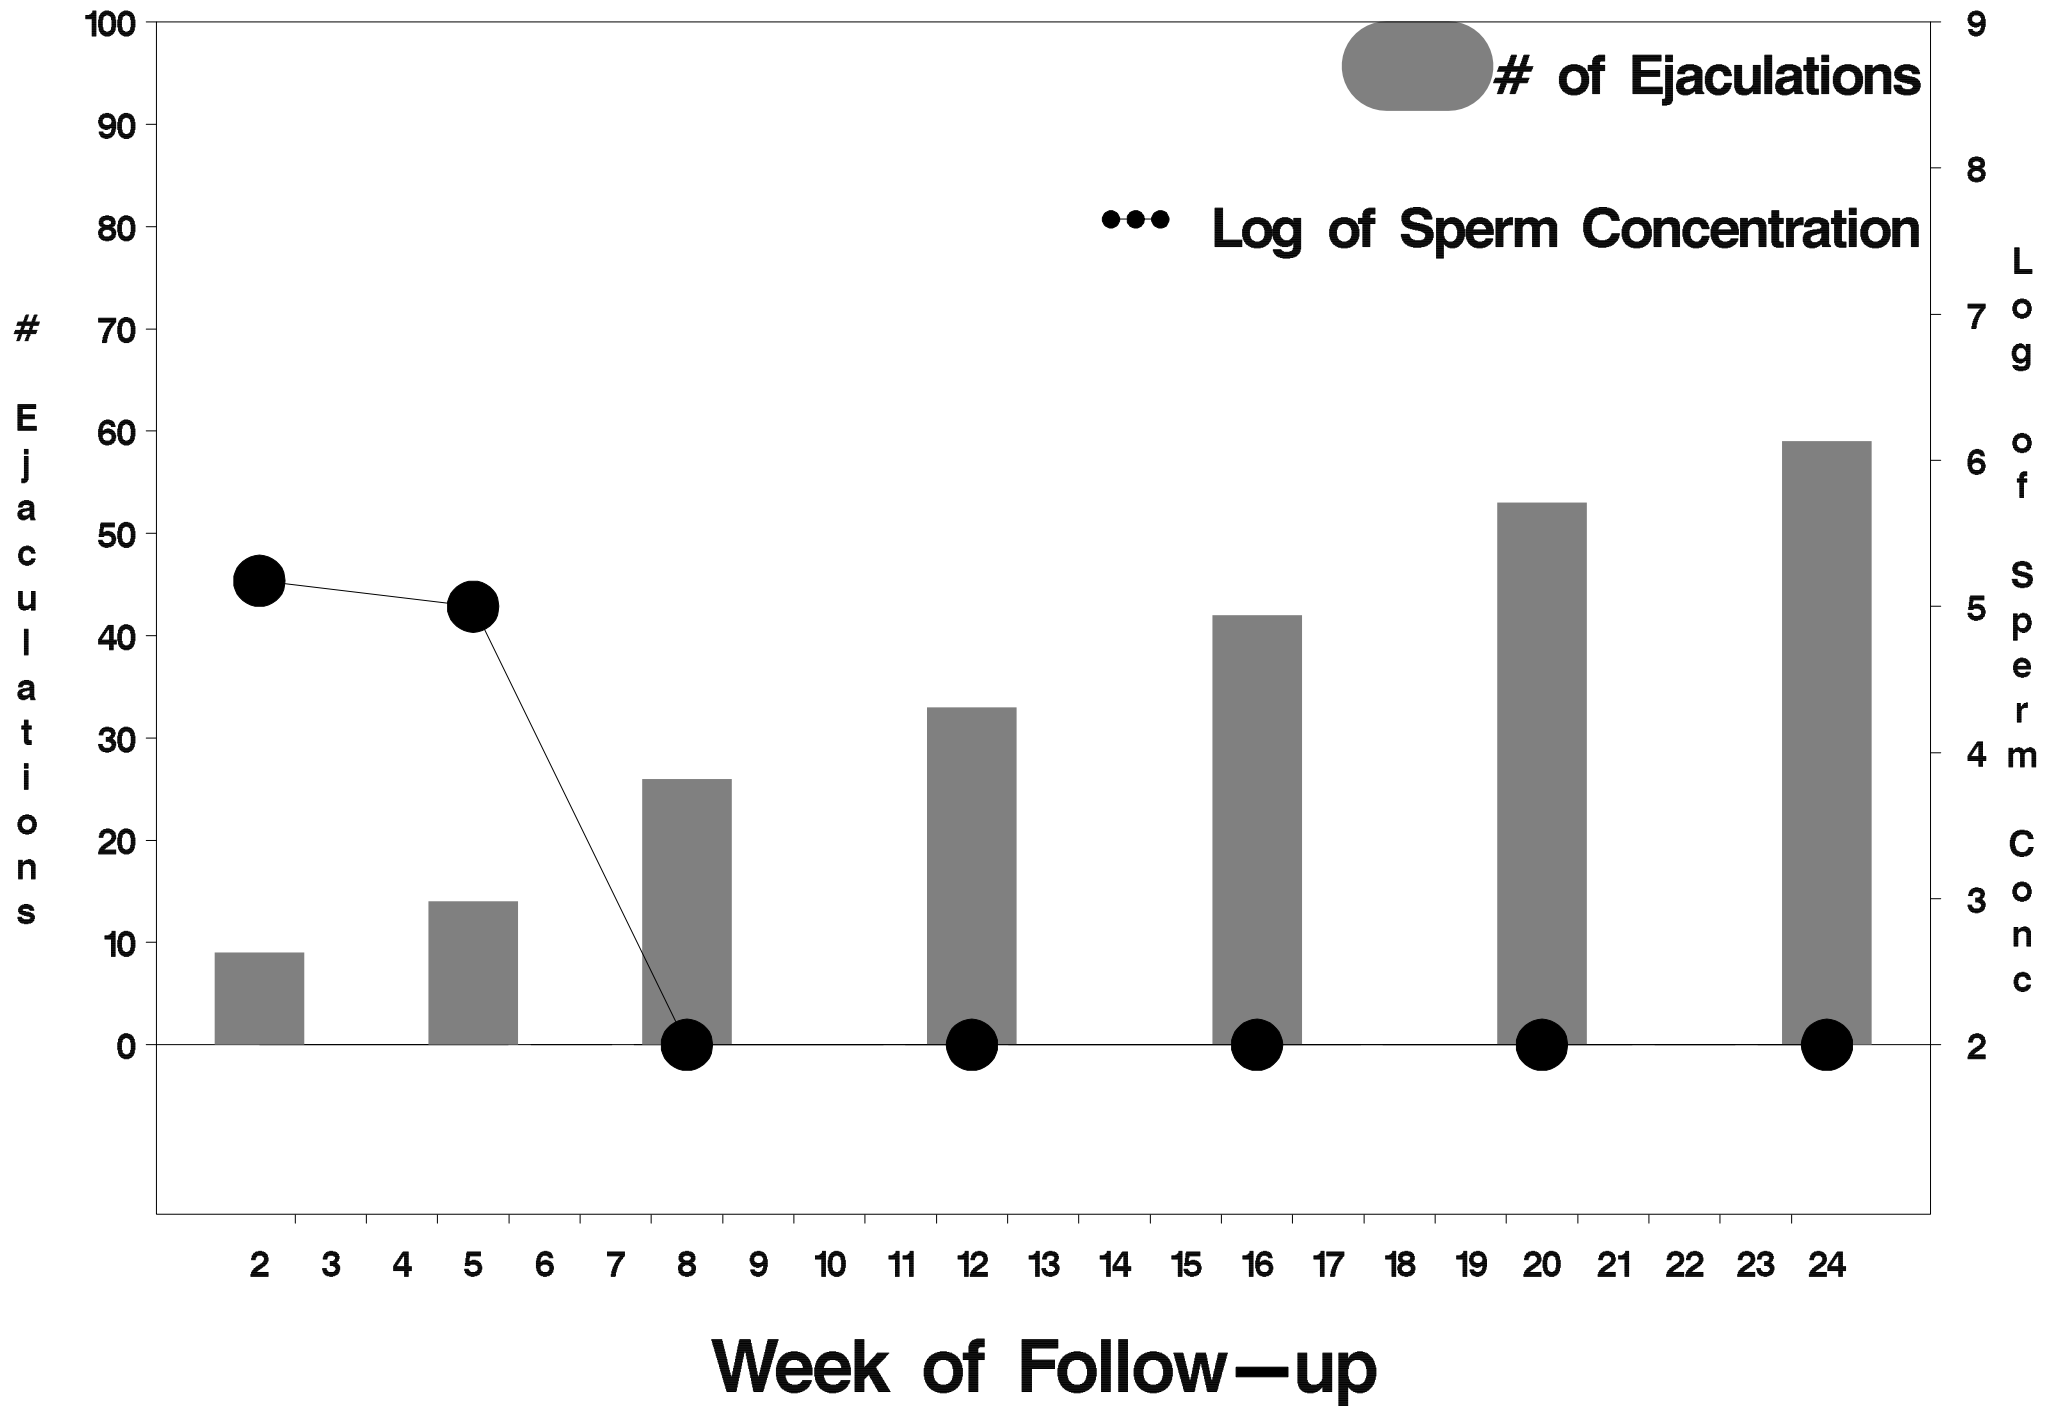

# Participant number= 556

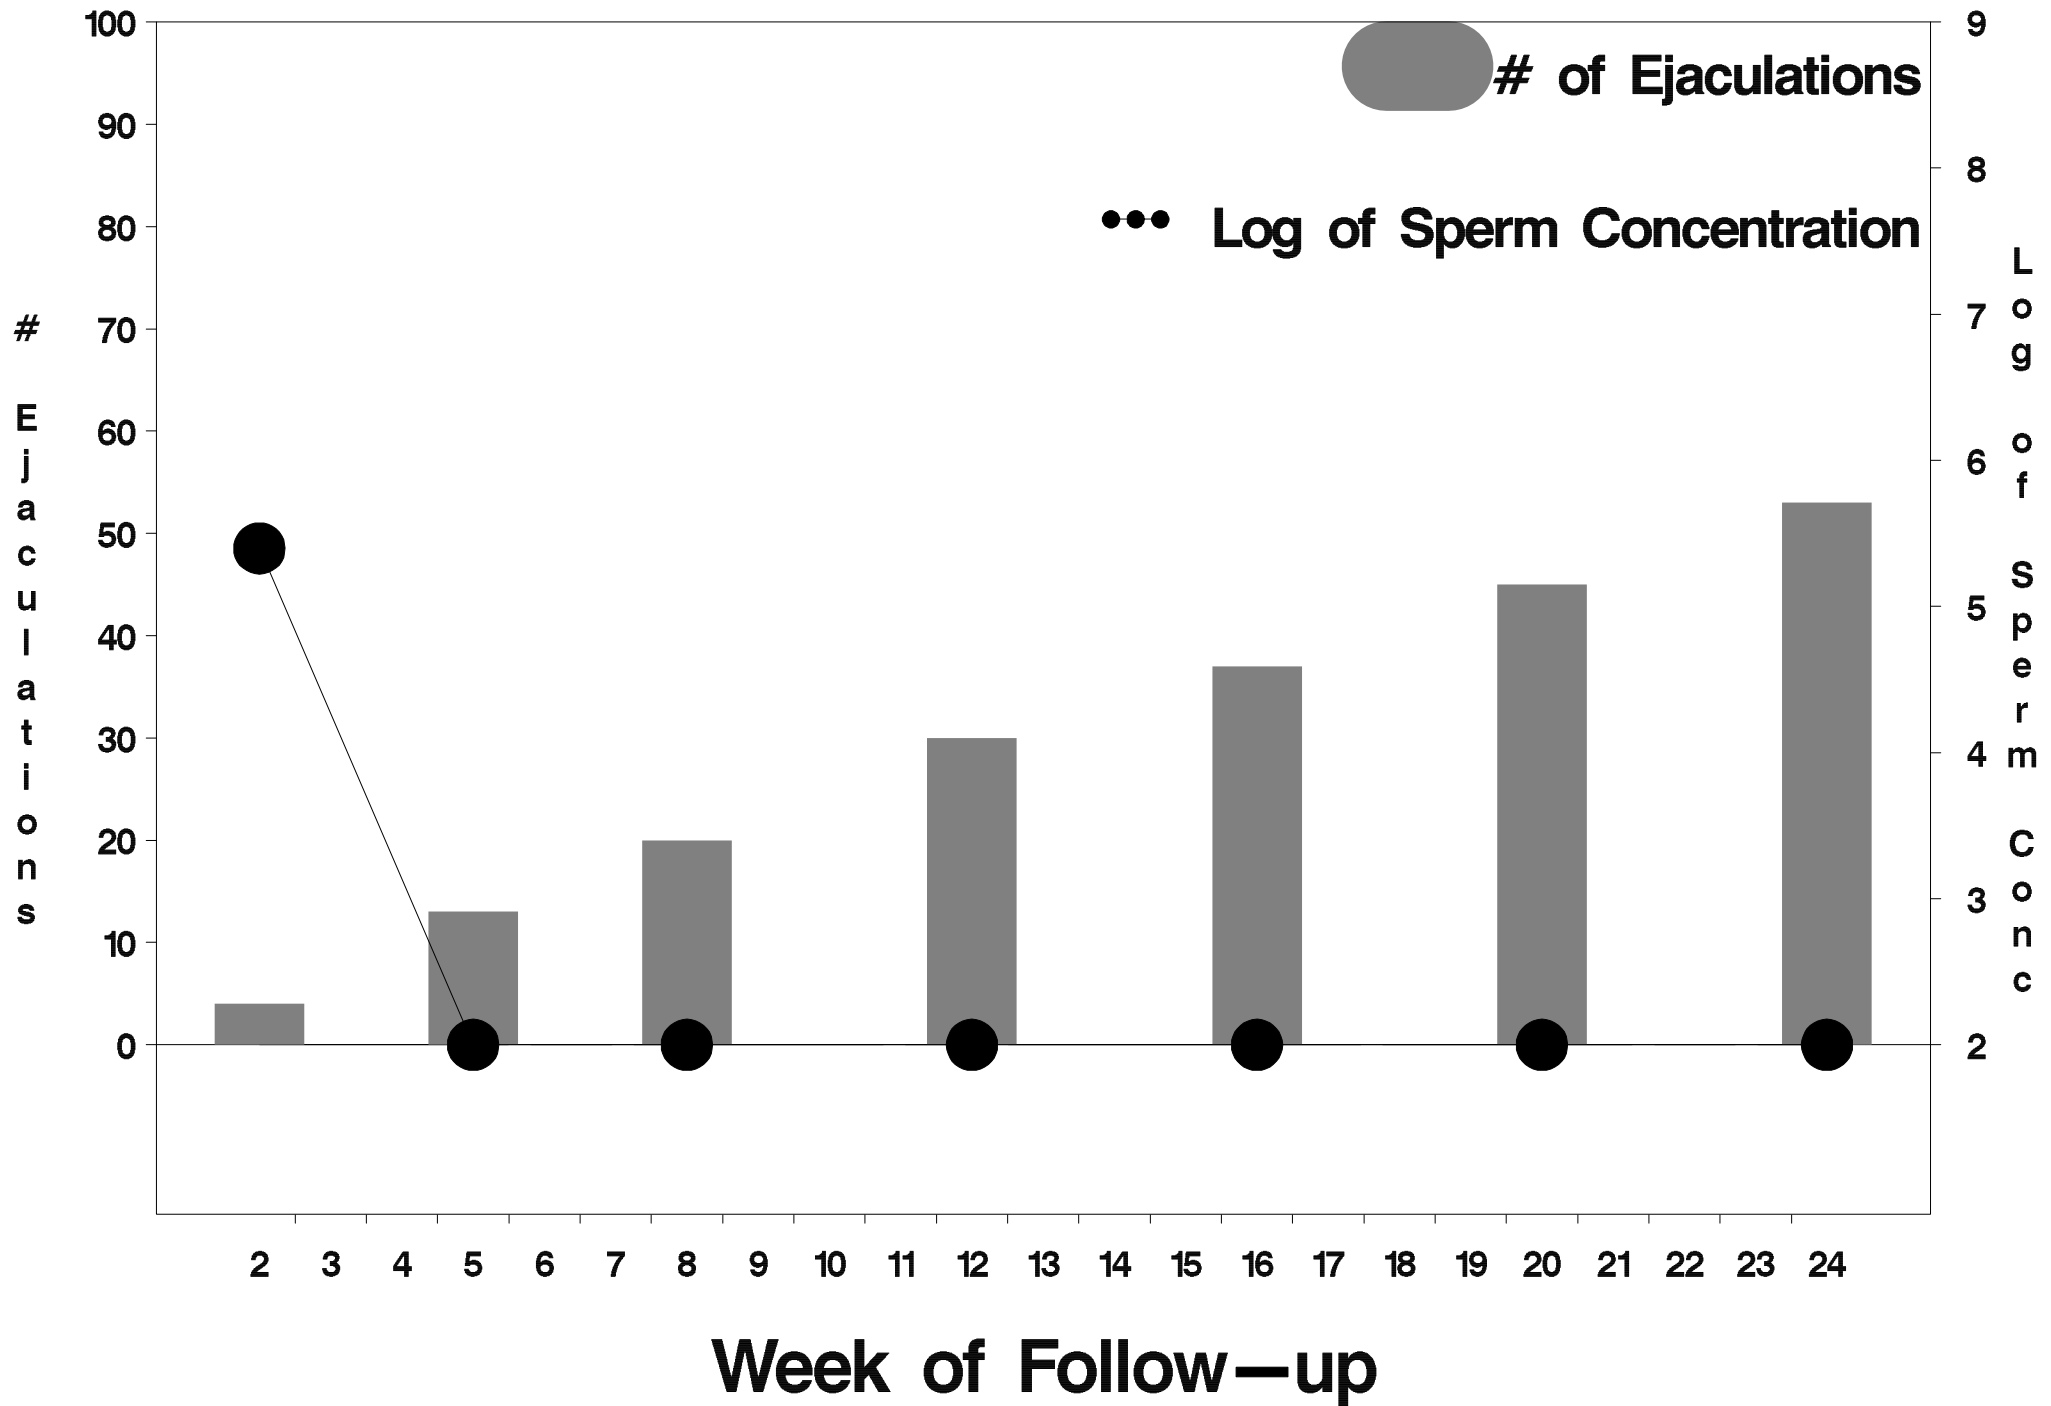

# Participant number= 558

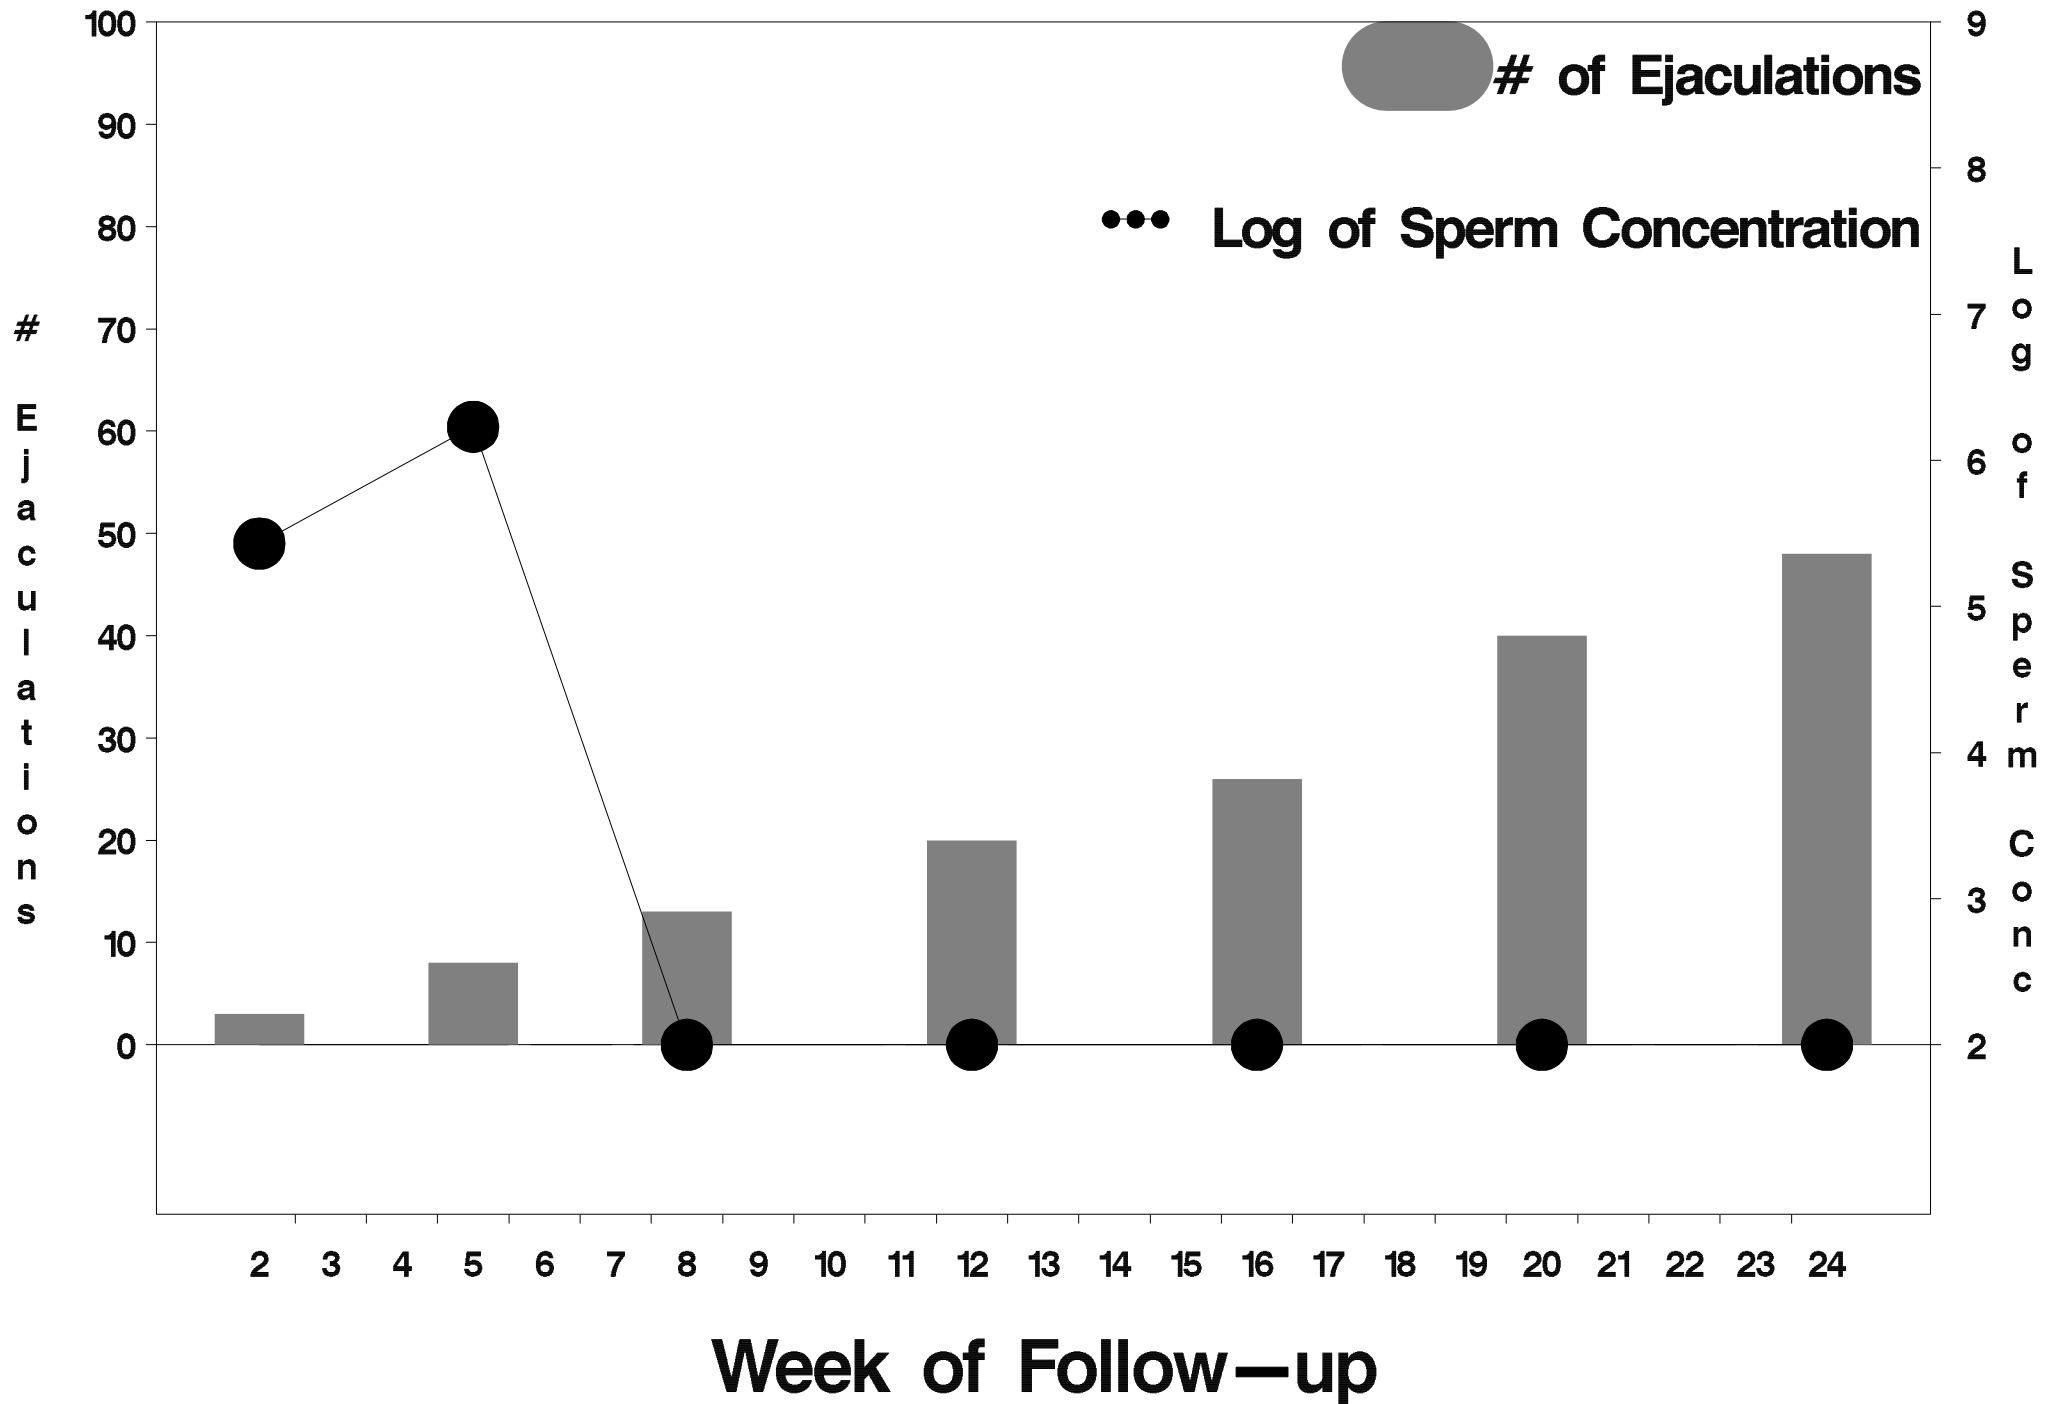

# Participant number= 559

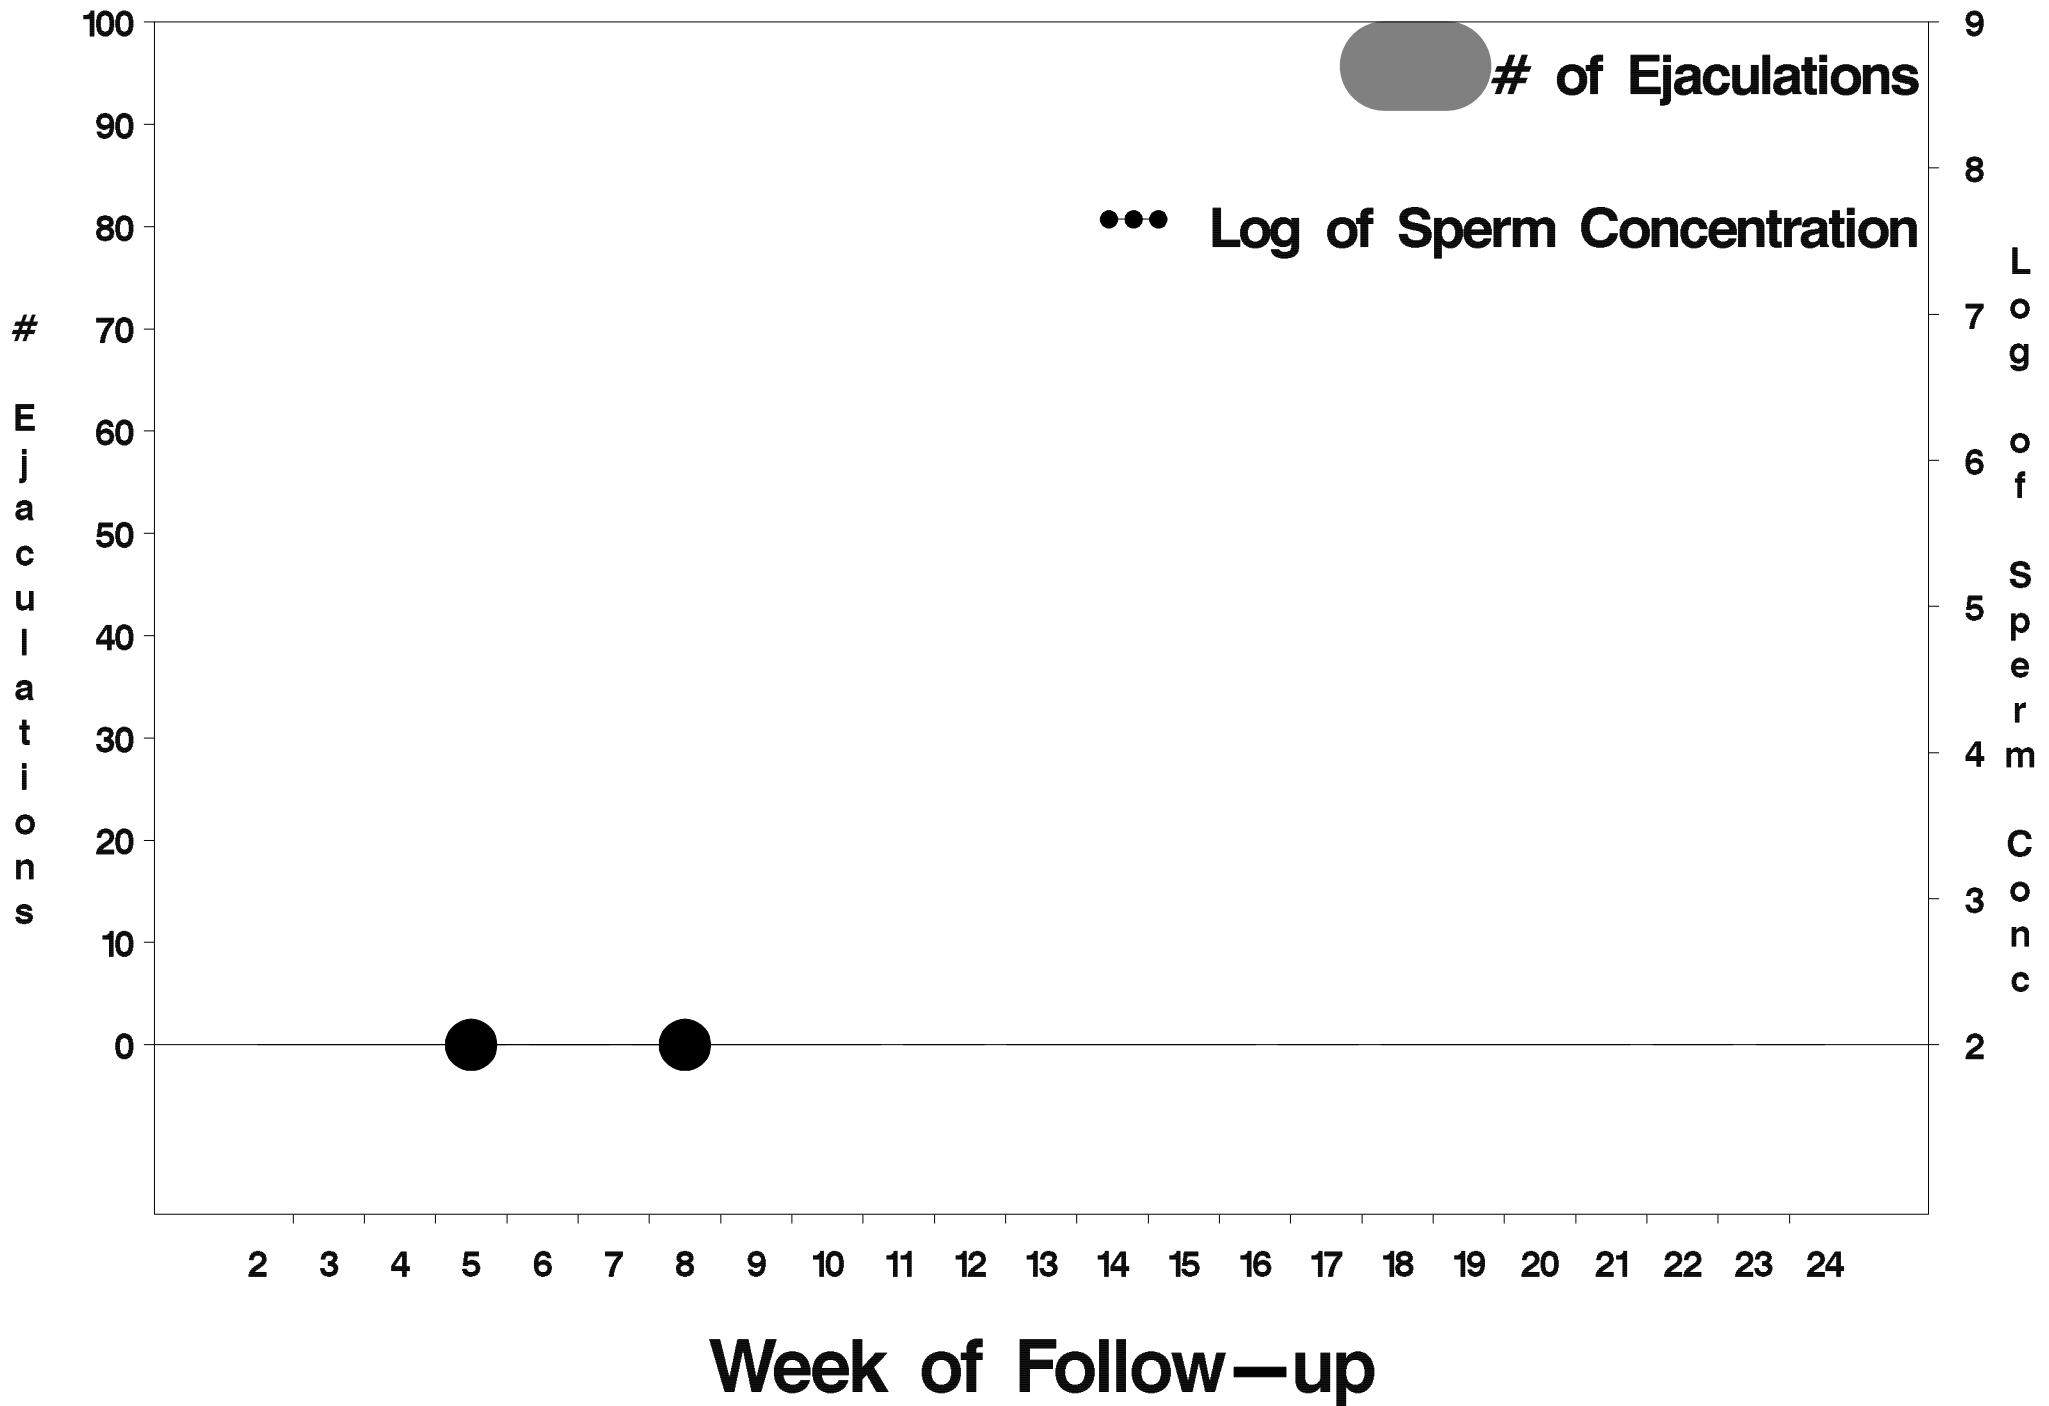

# Participant number= 560

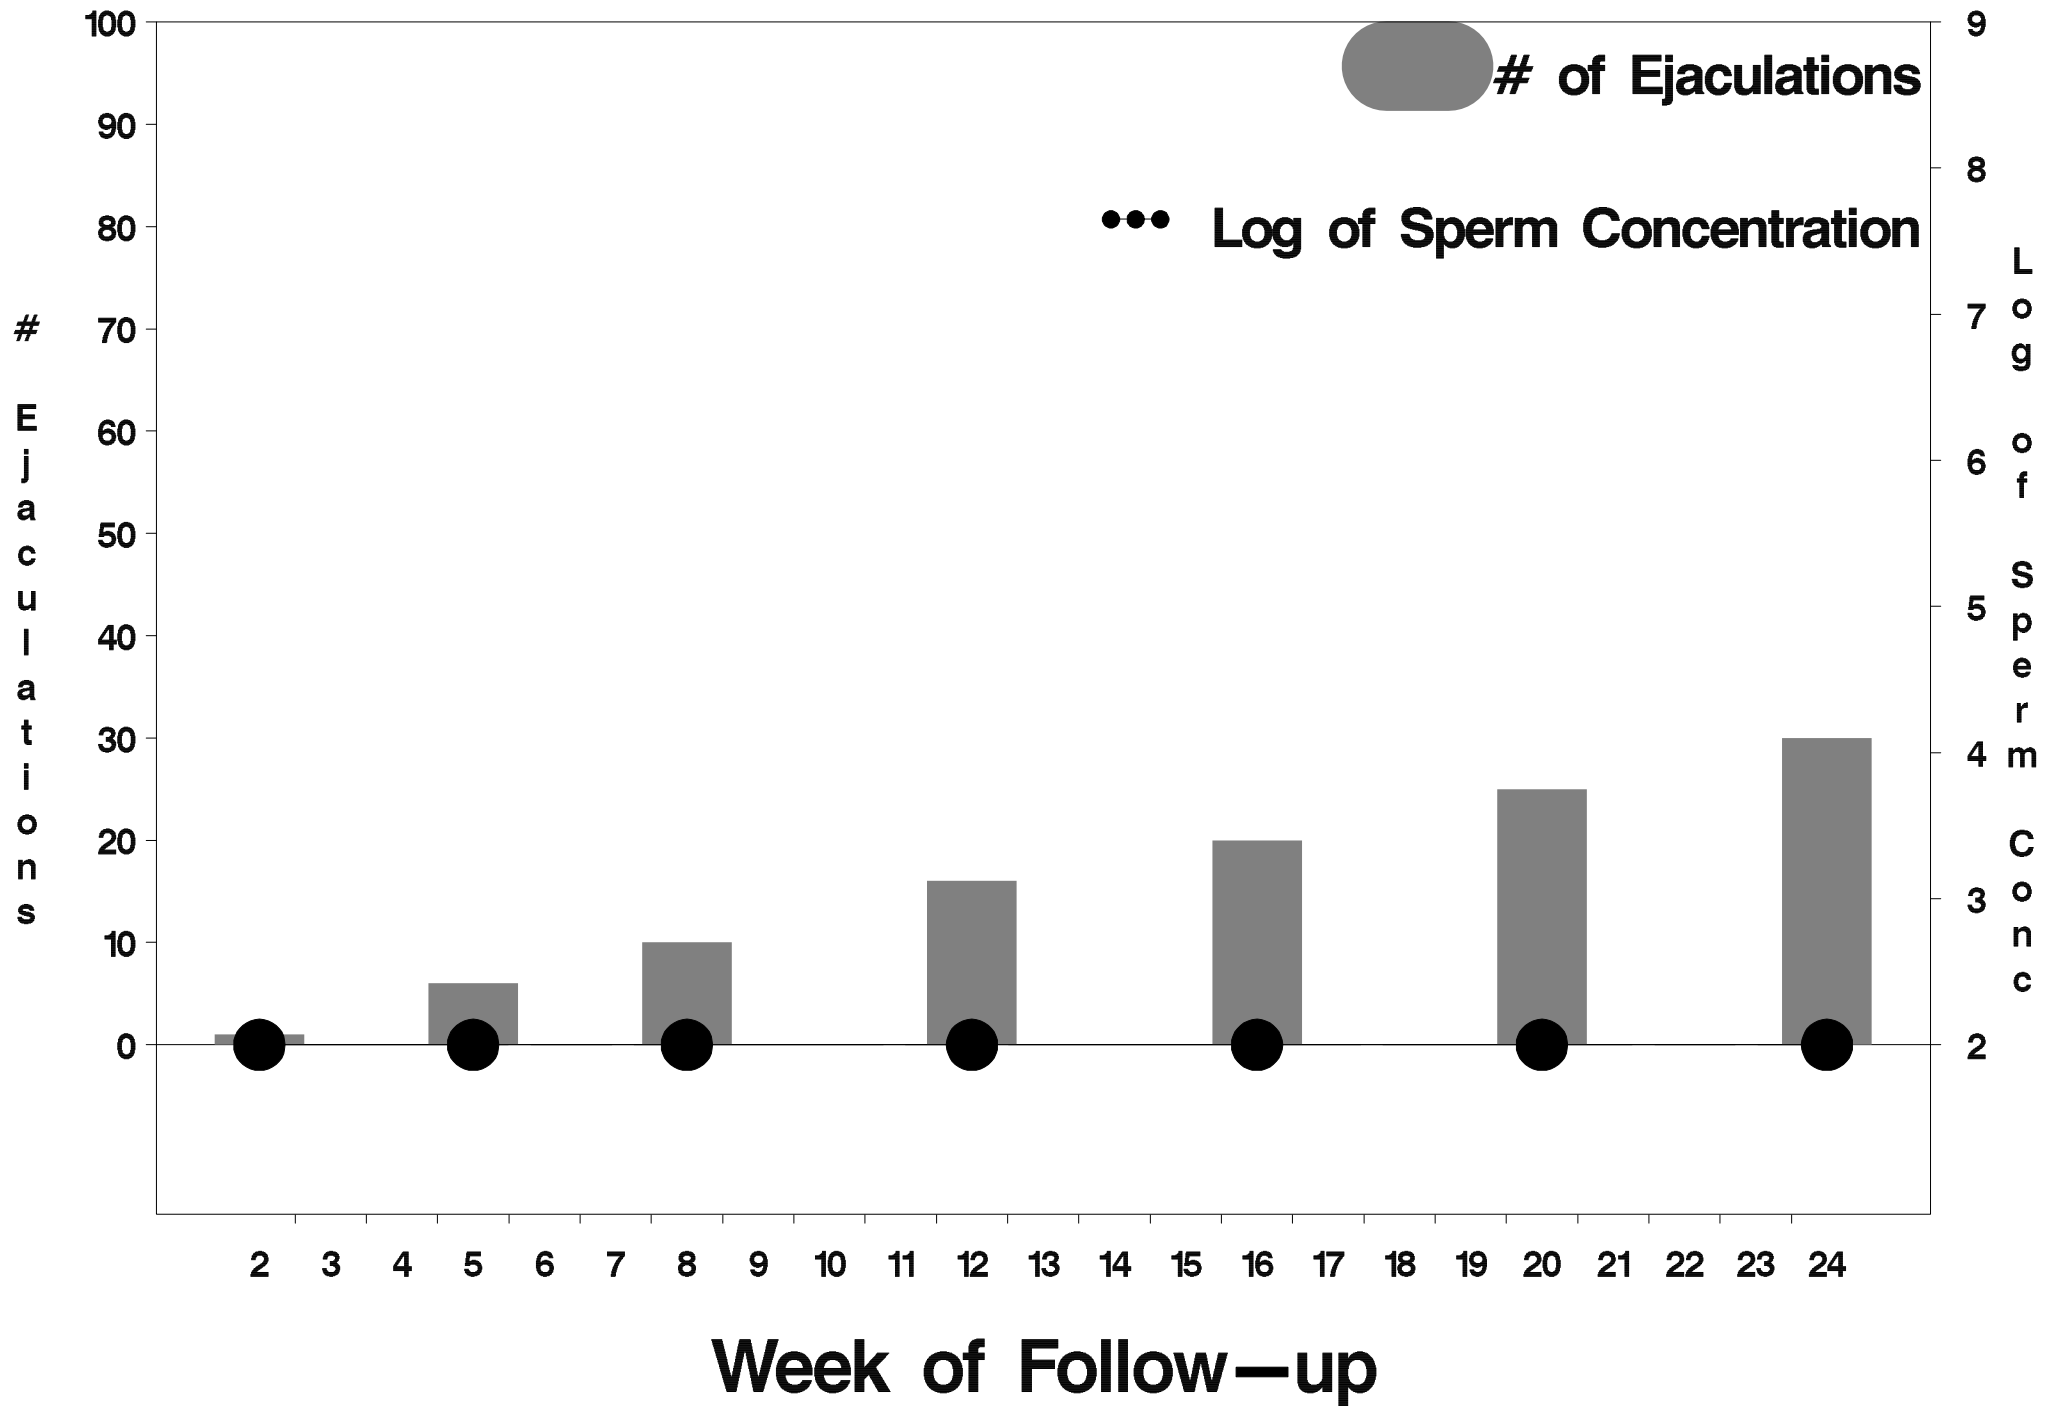

# Participant number= 561

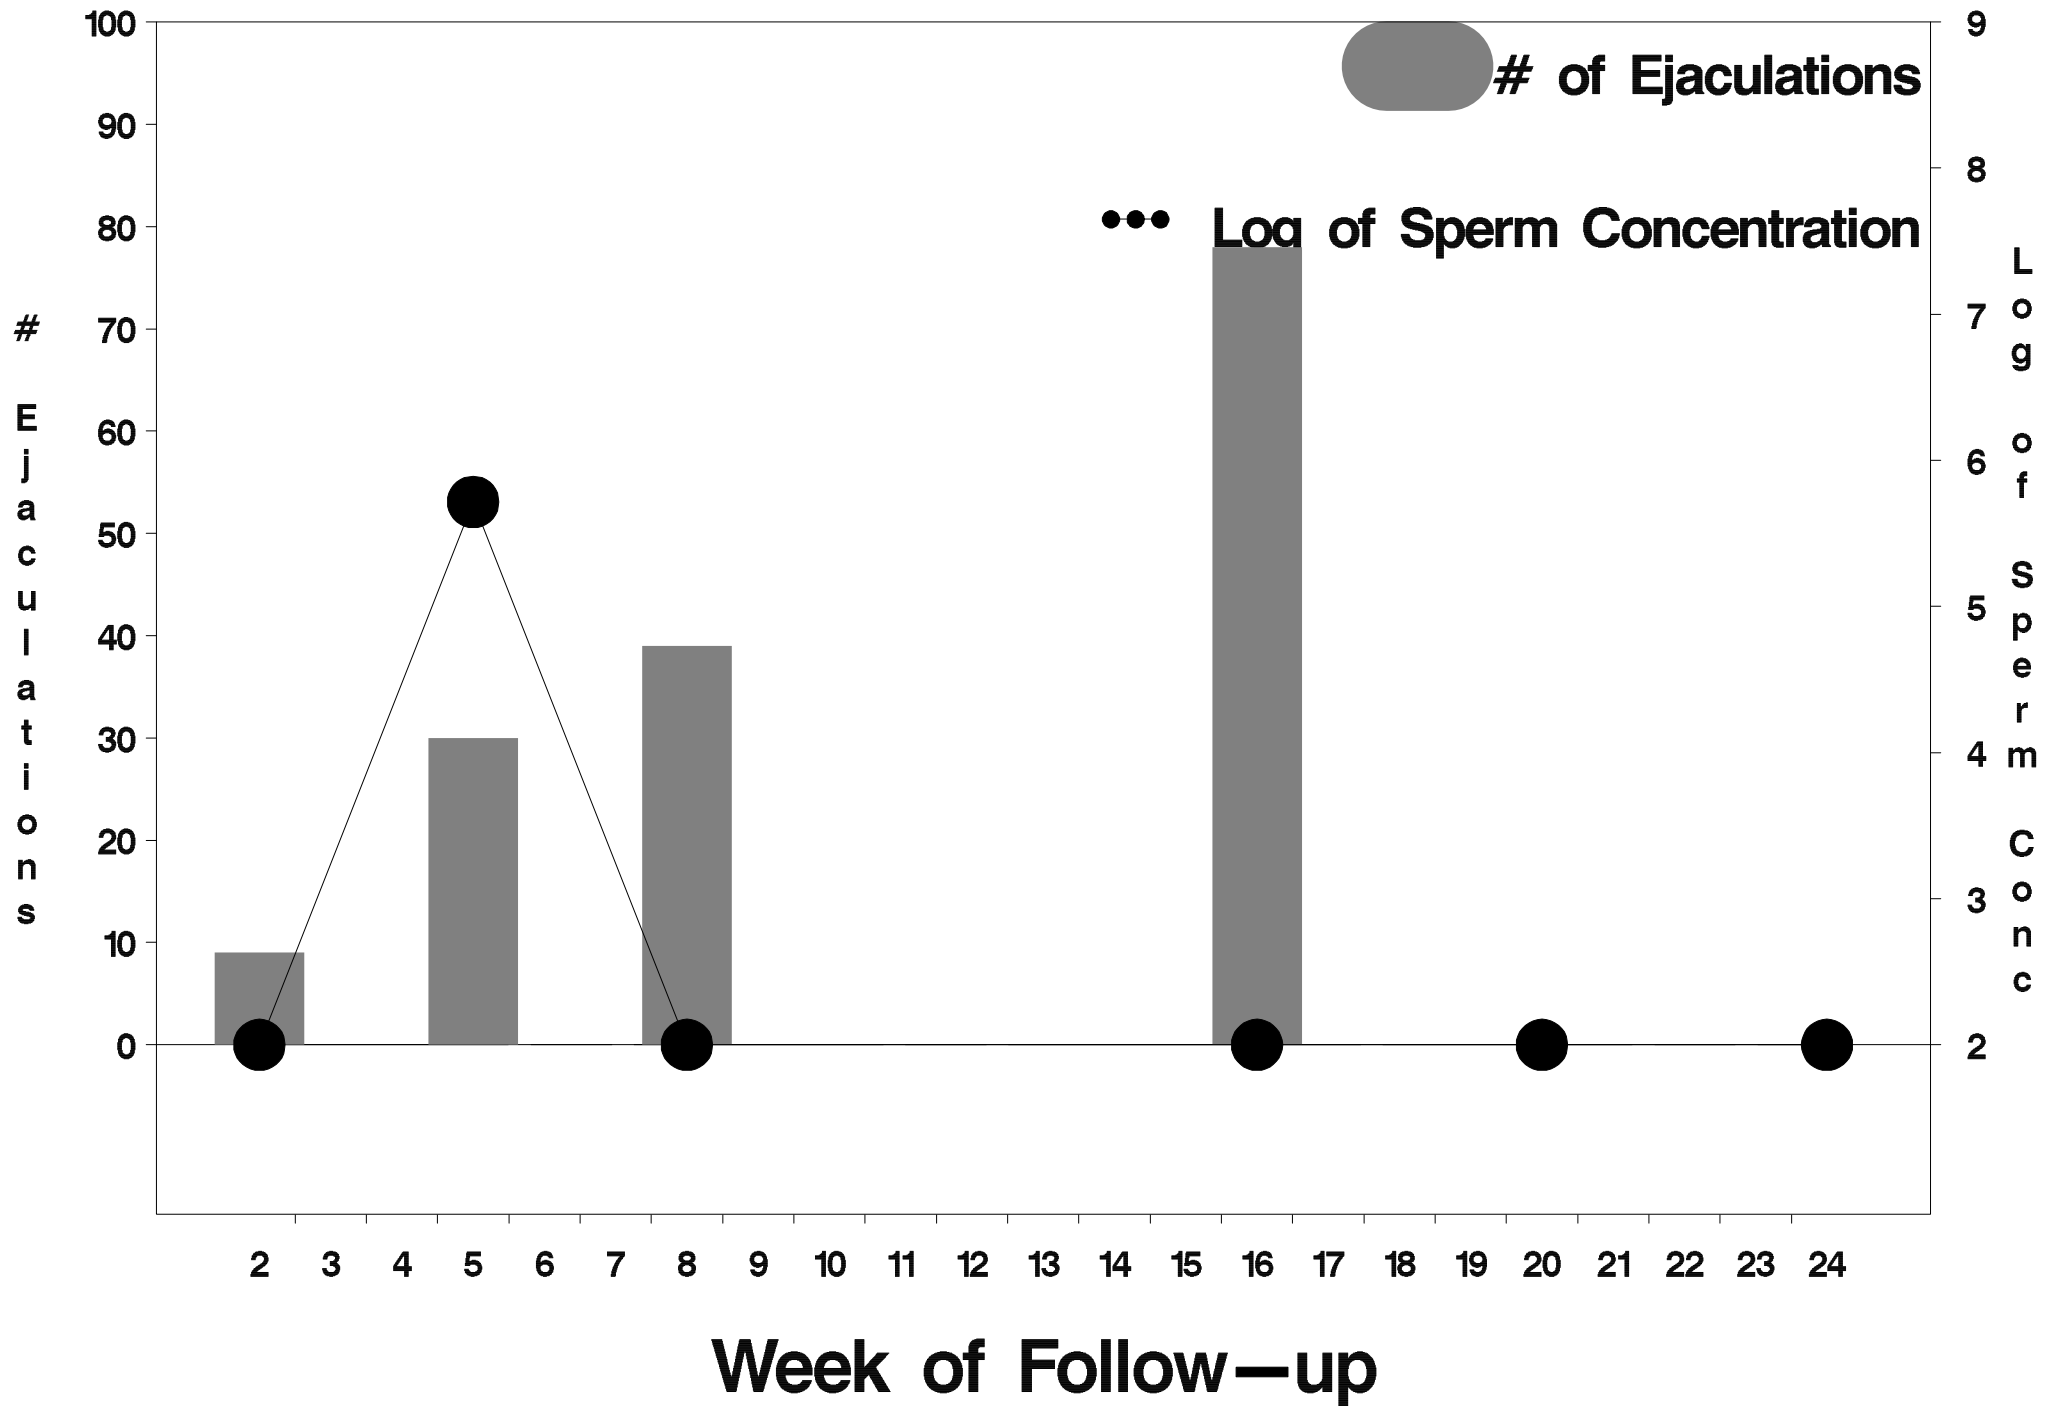

# Participant number= 562

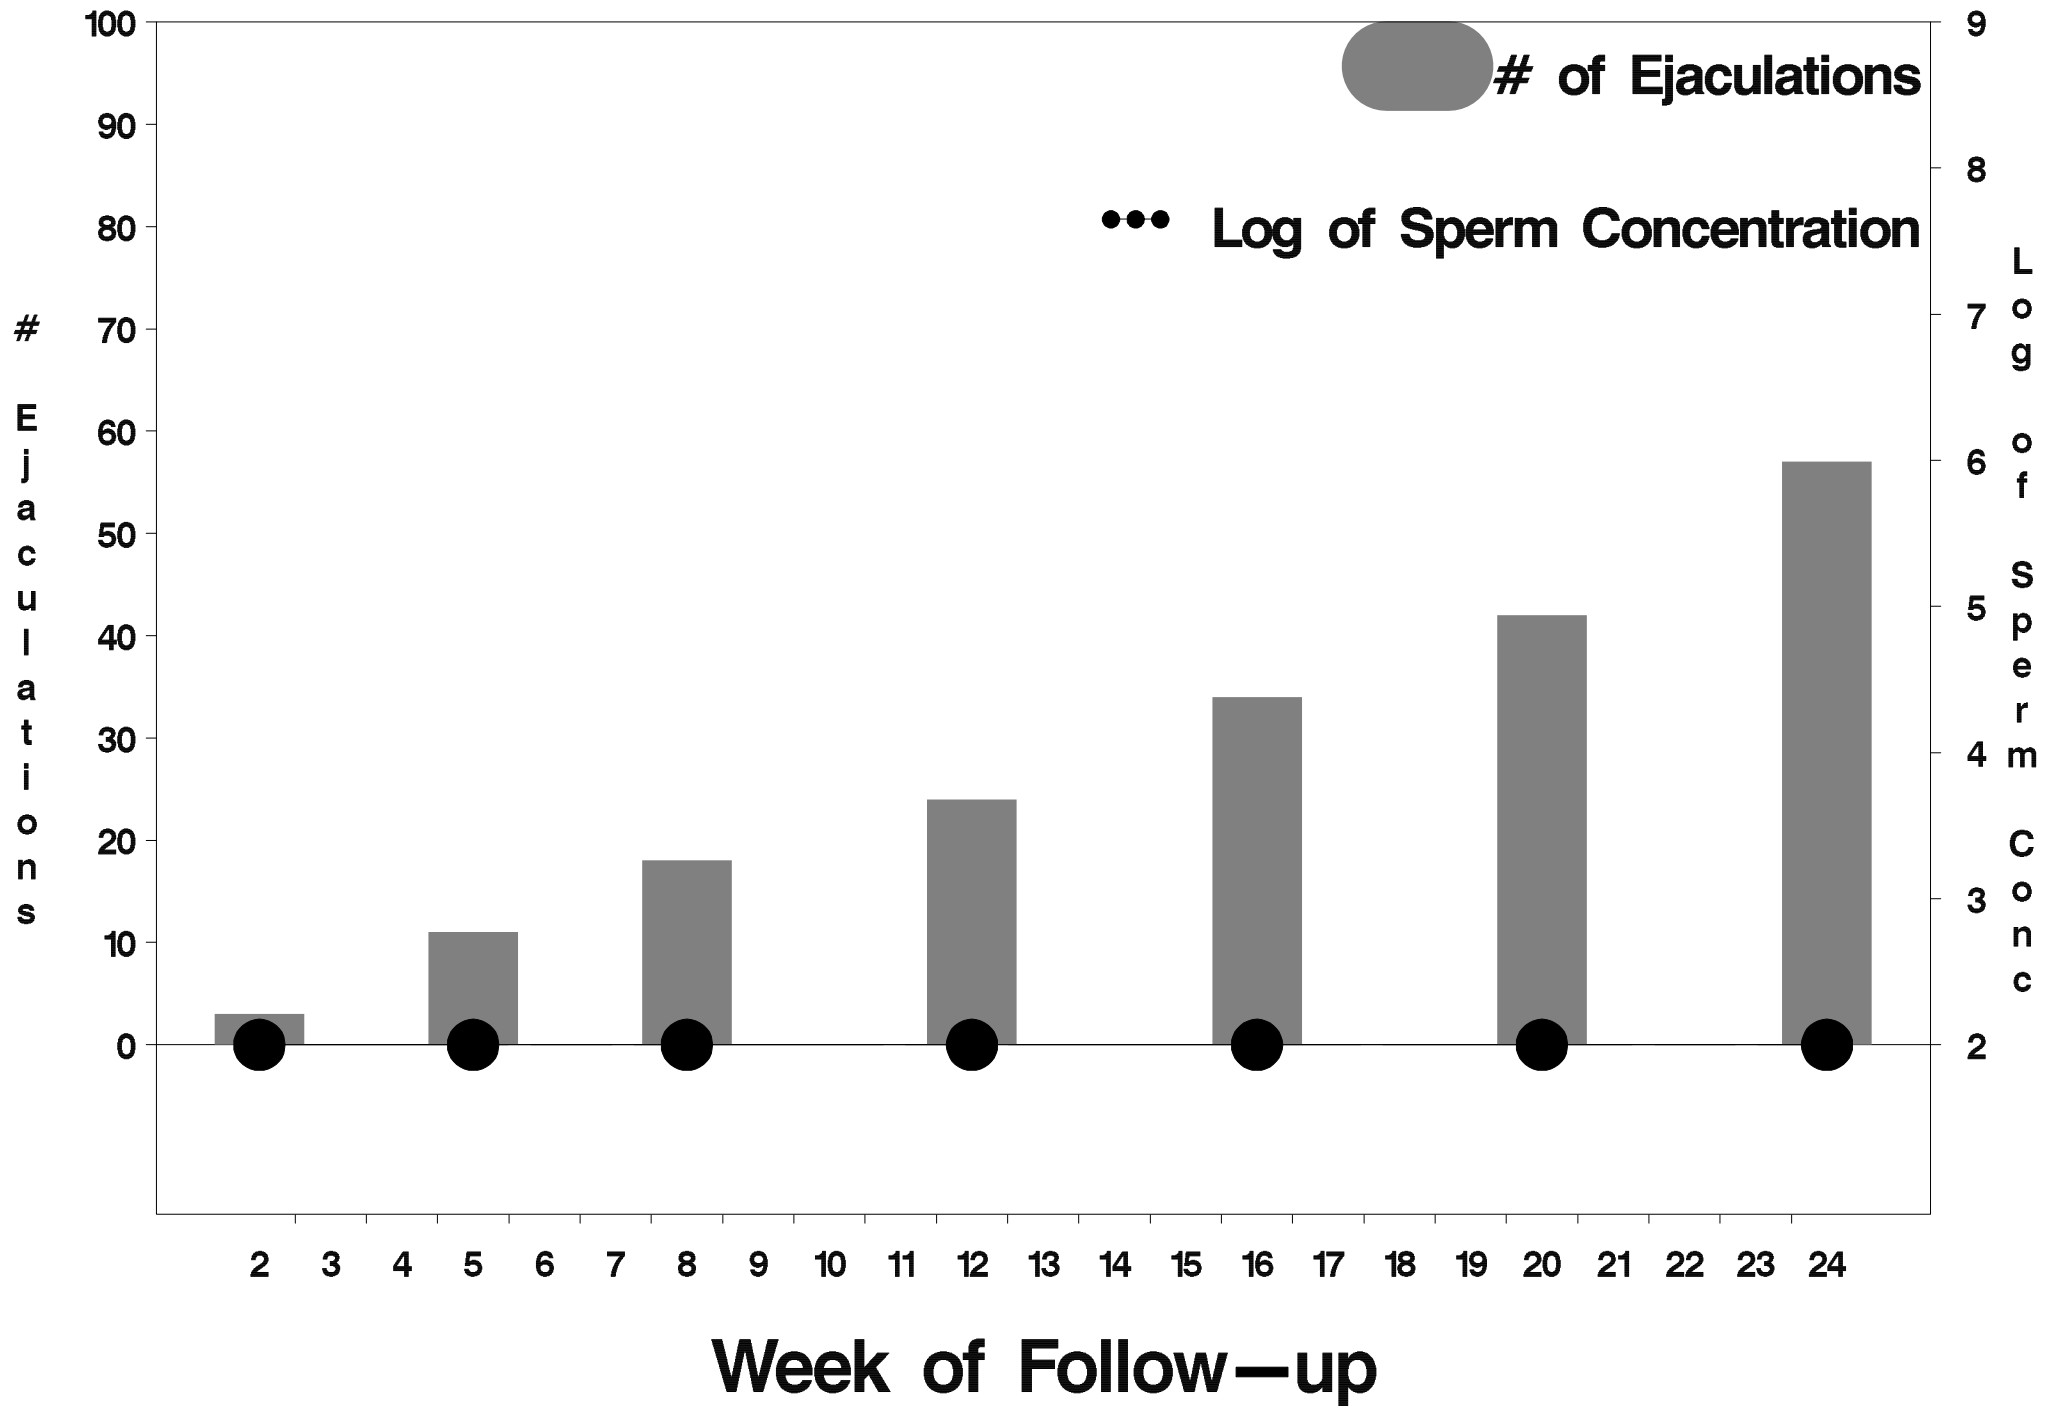

# Participant number= 563

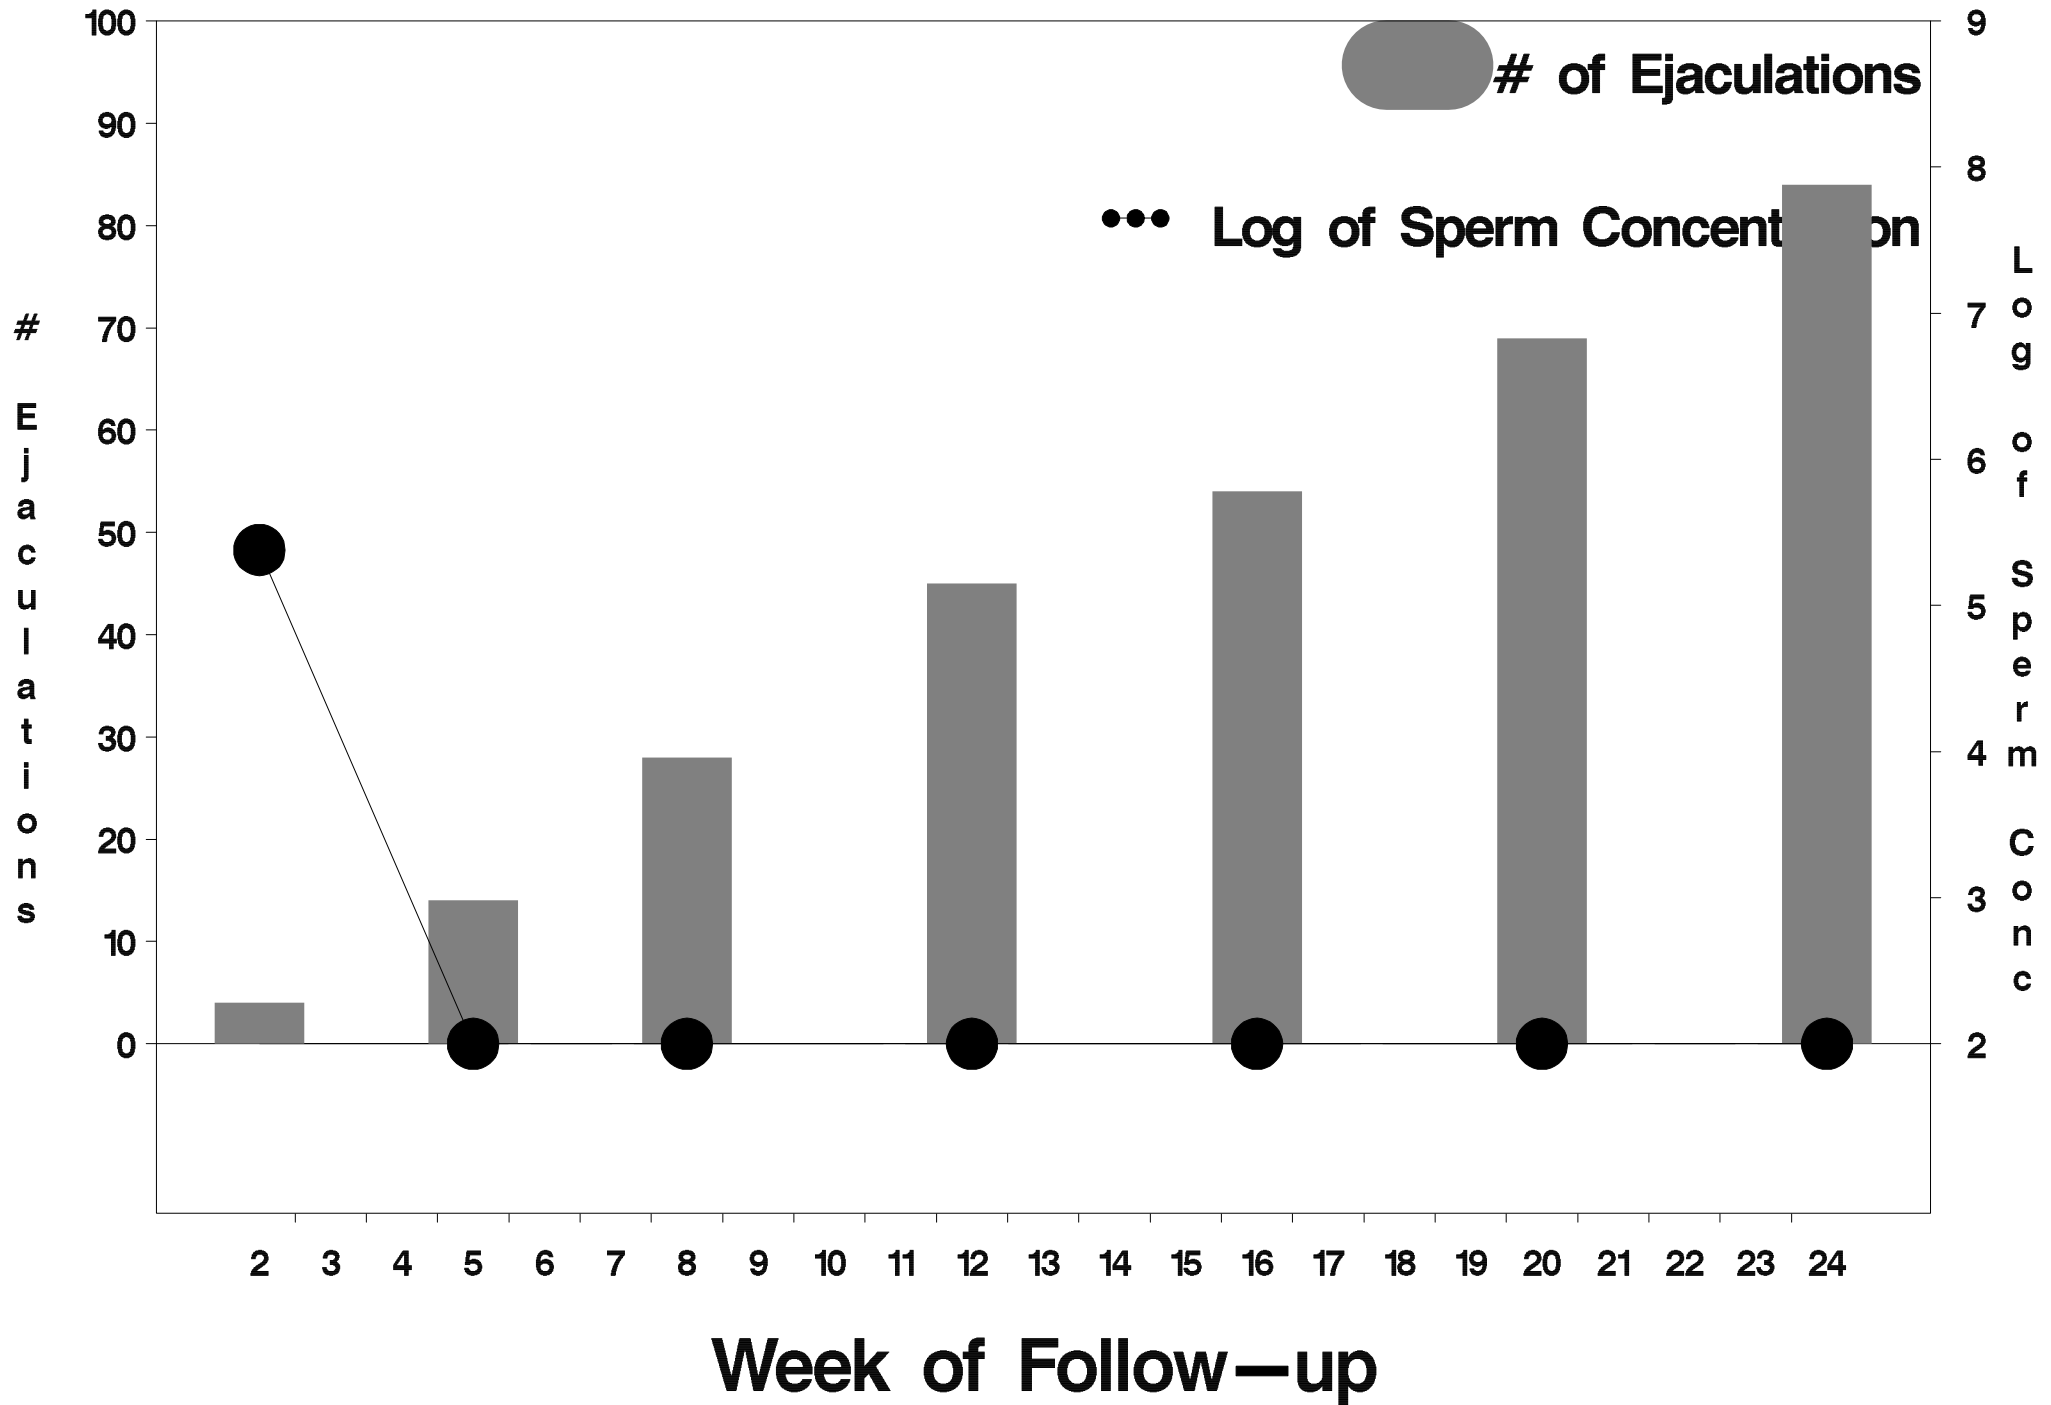



# Participant number= 564

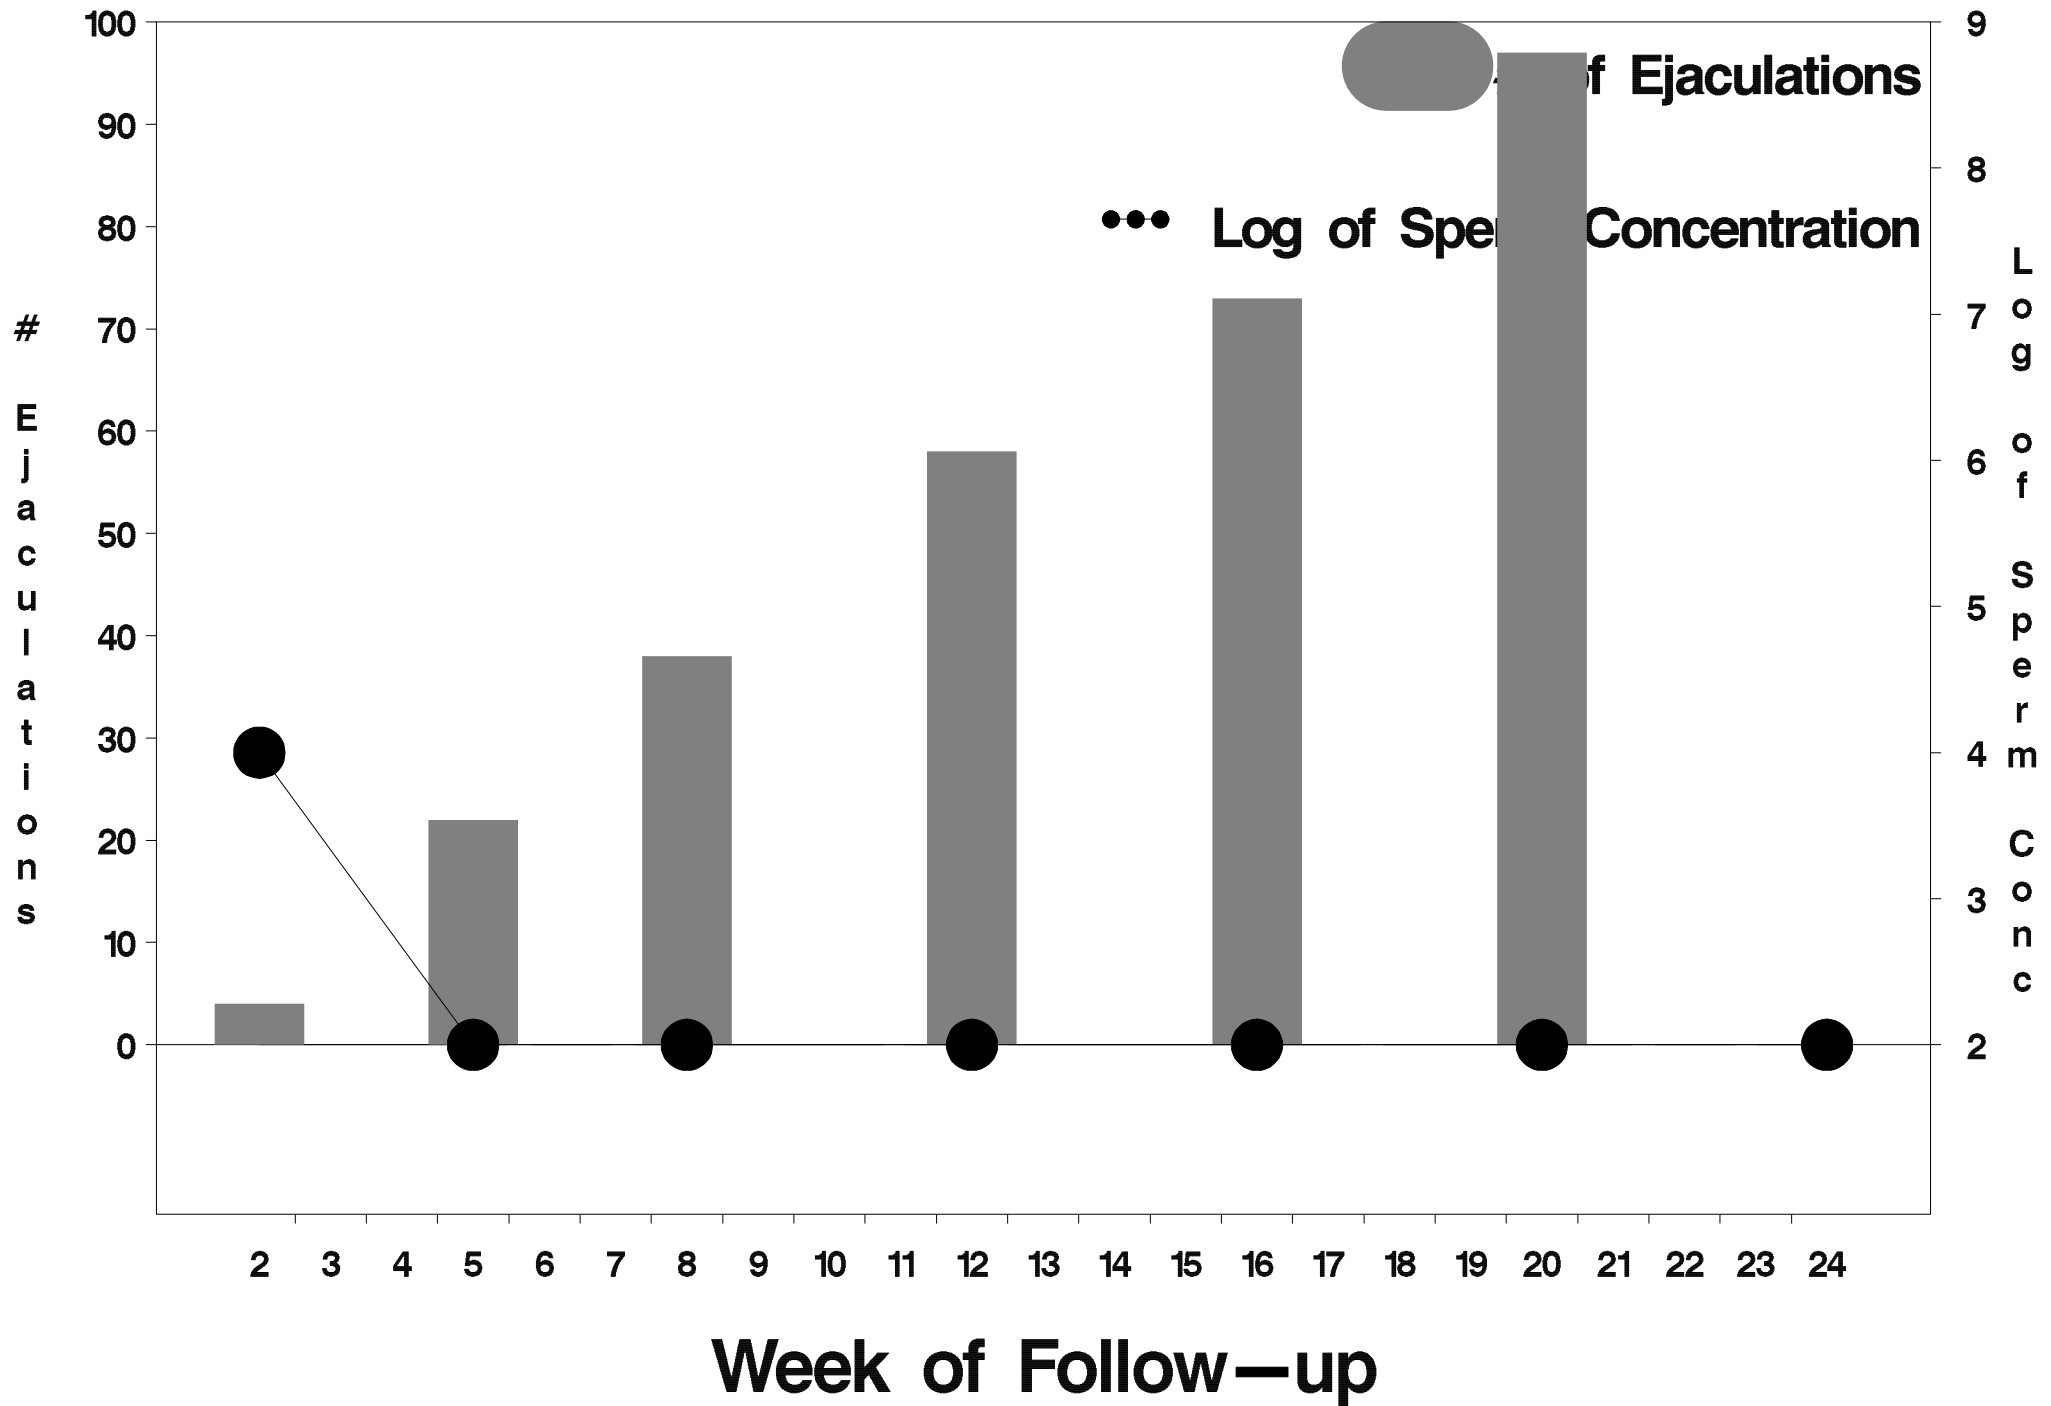

# Participant number= 565

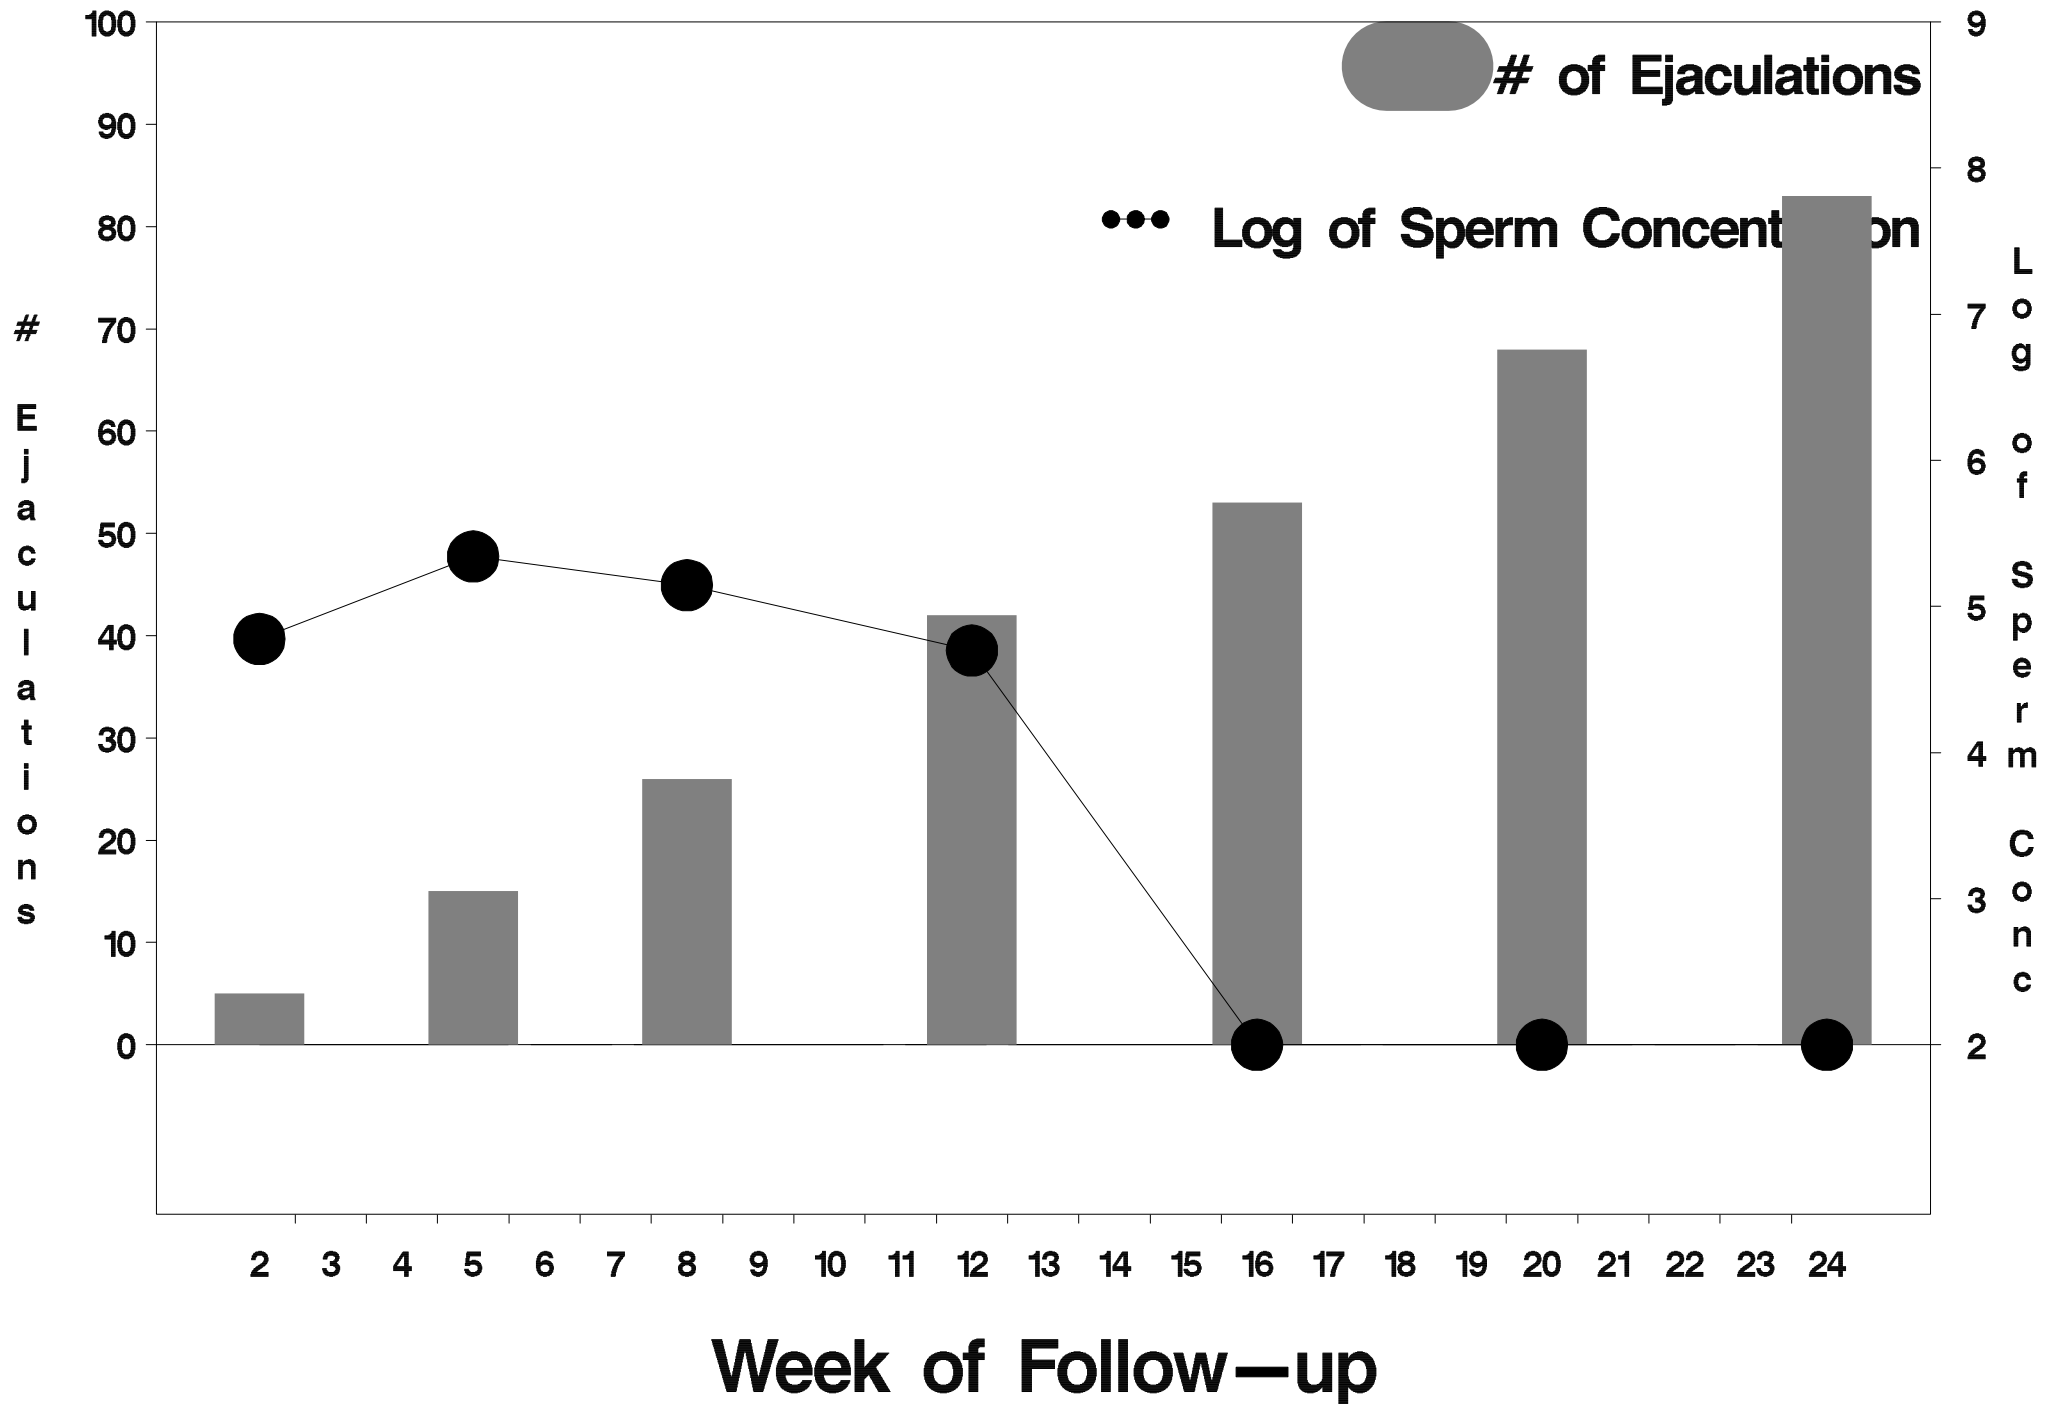

# Participant number= 566

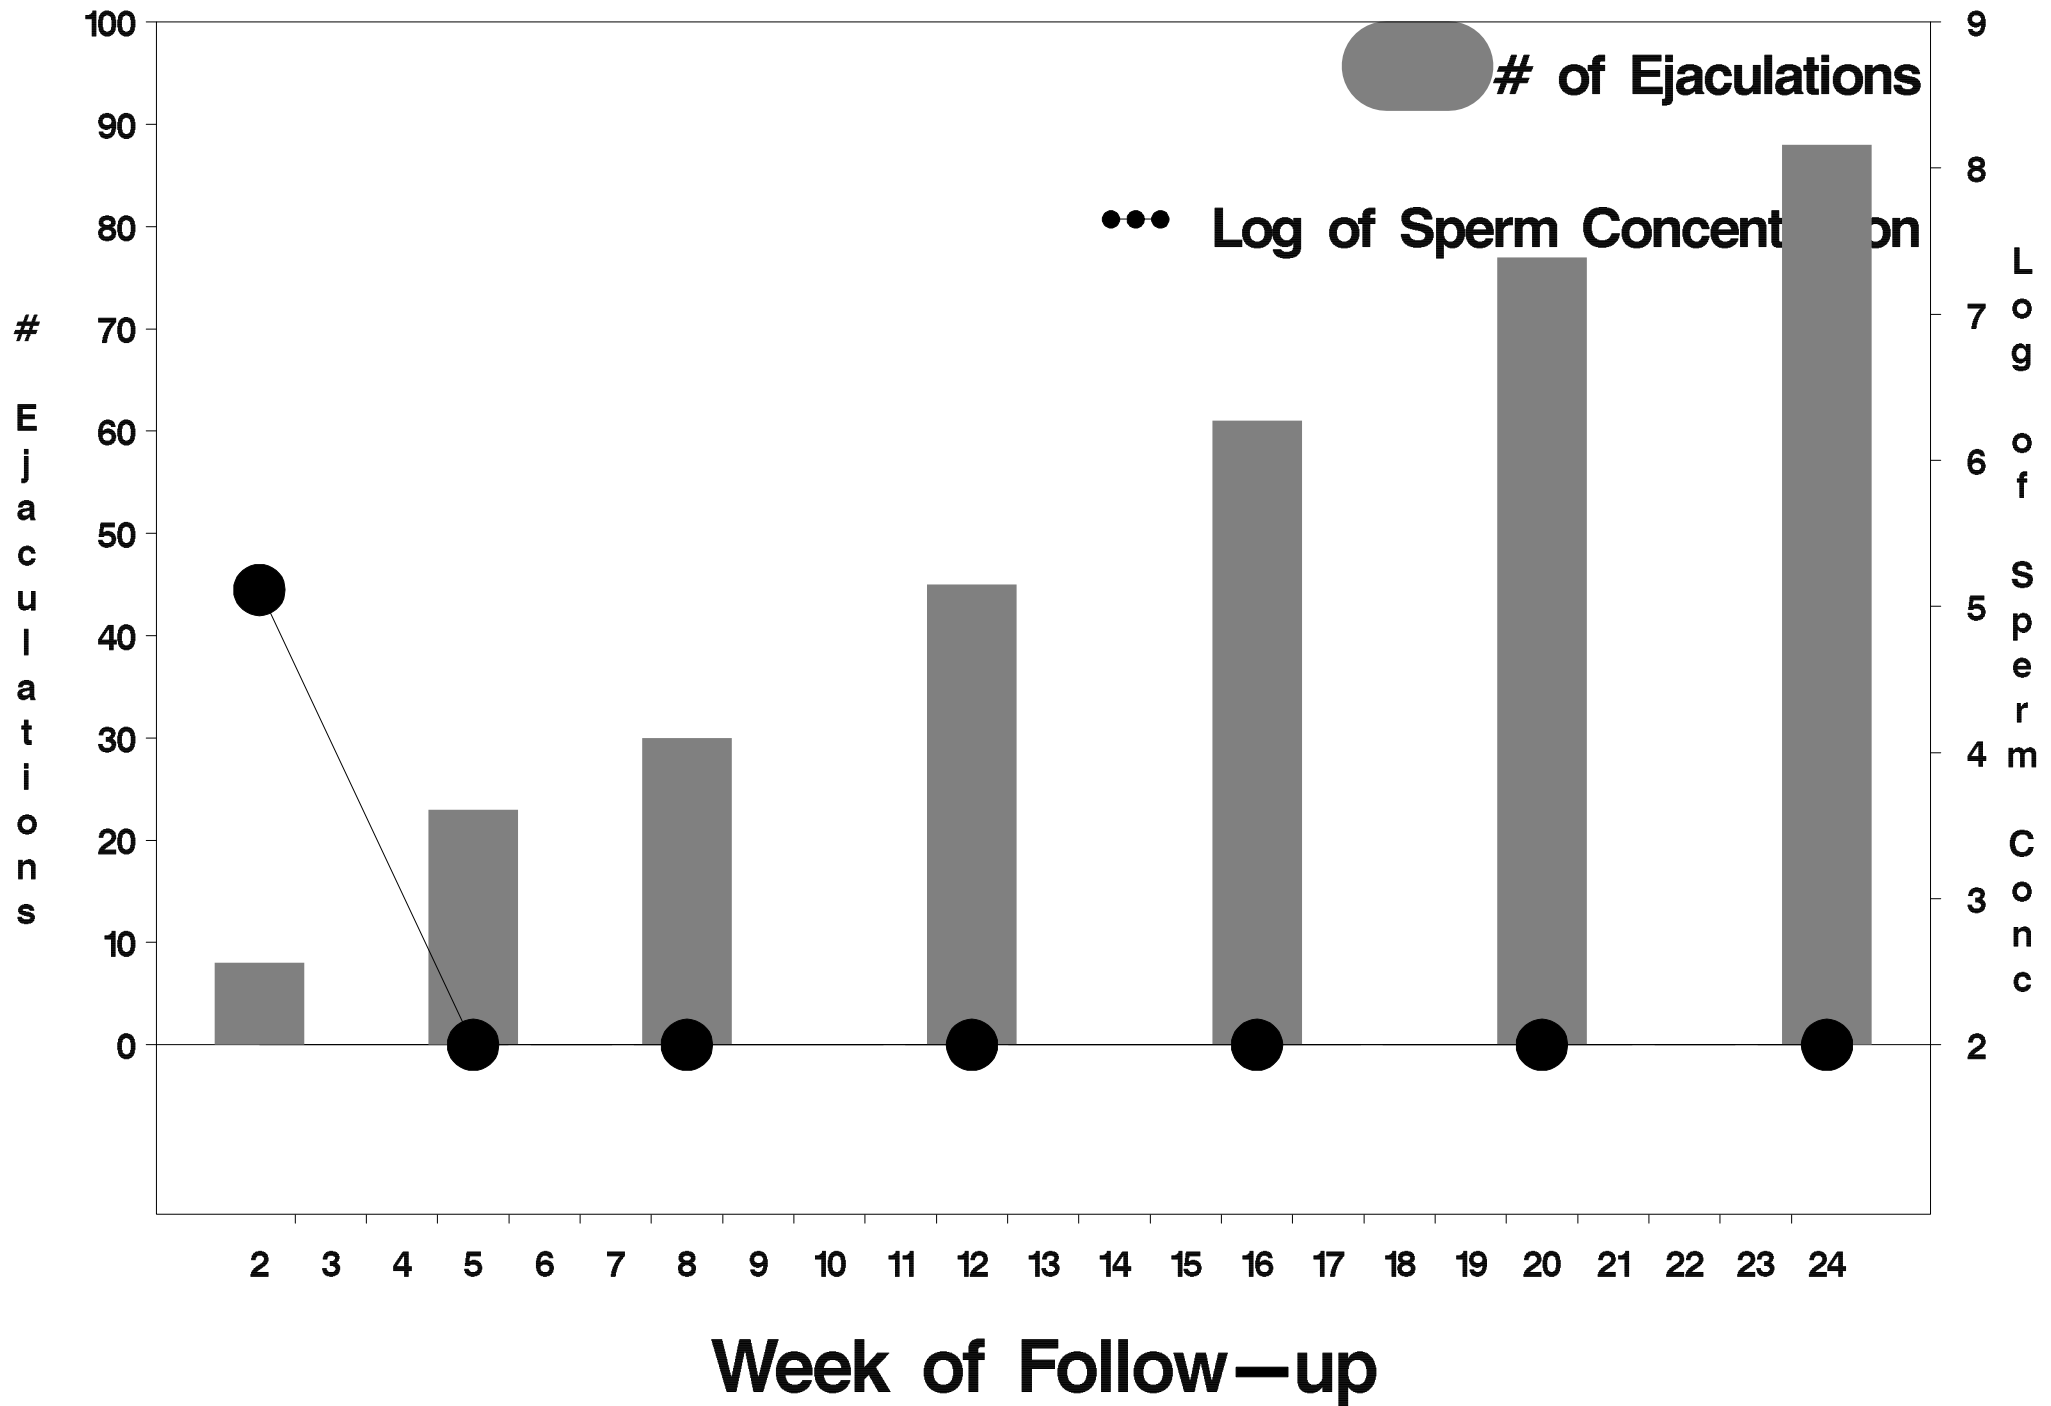

# Participant number= 567

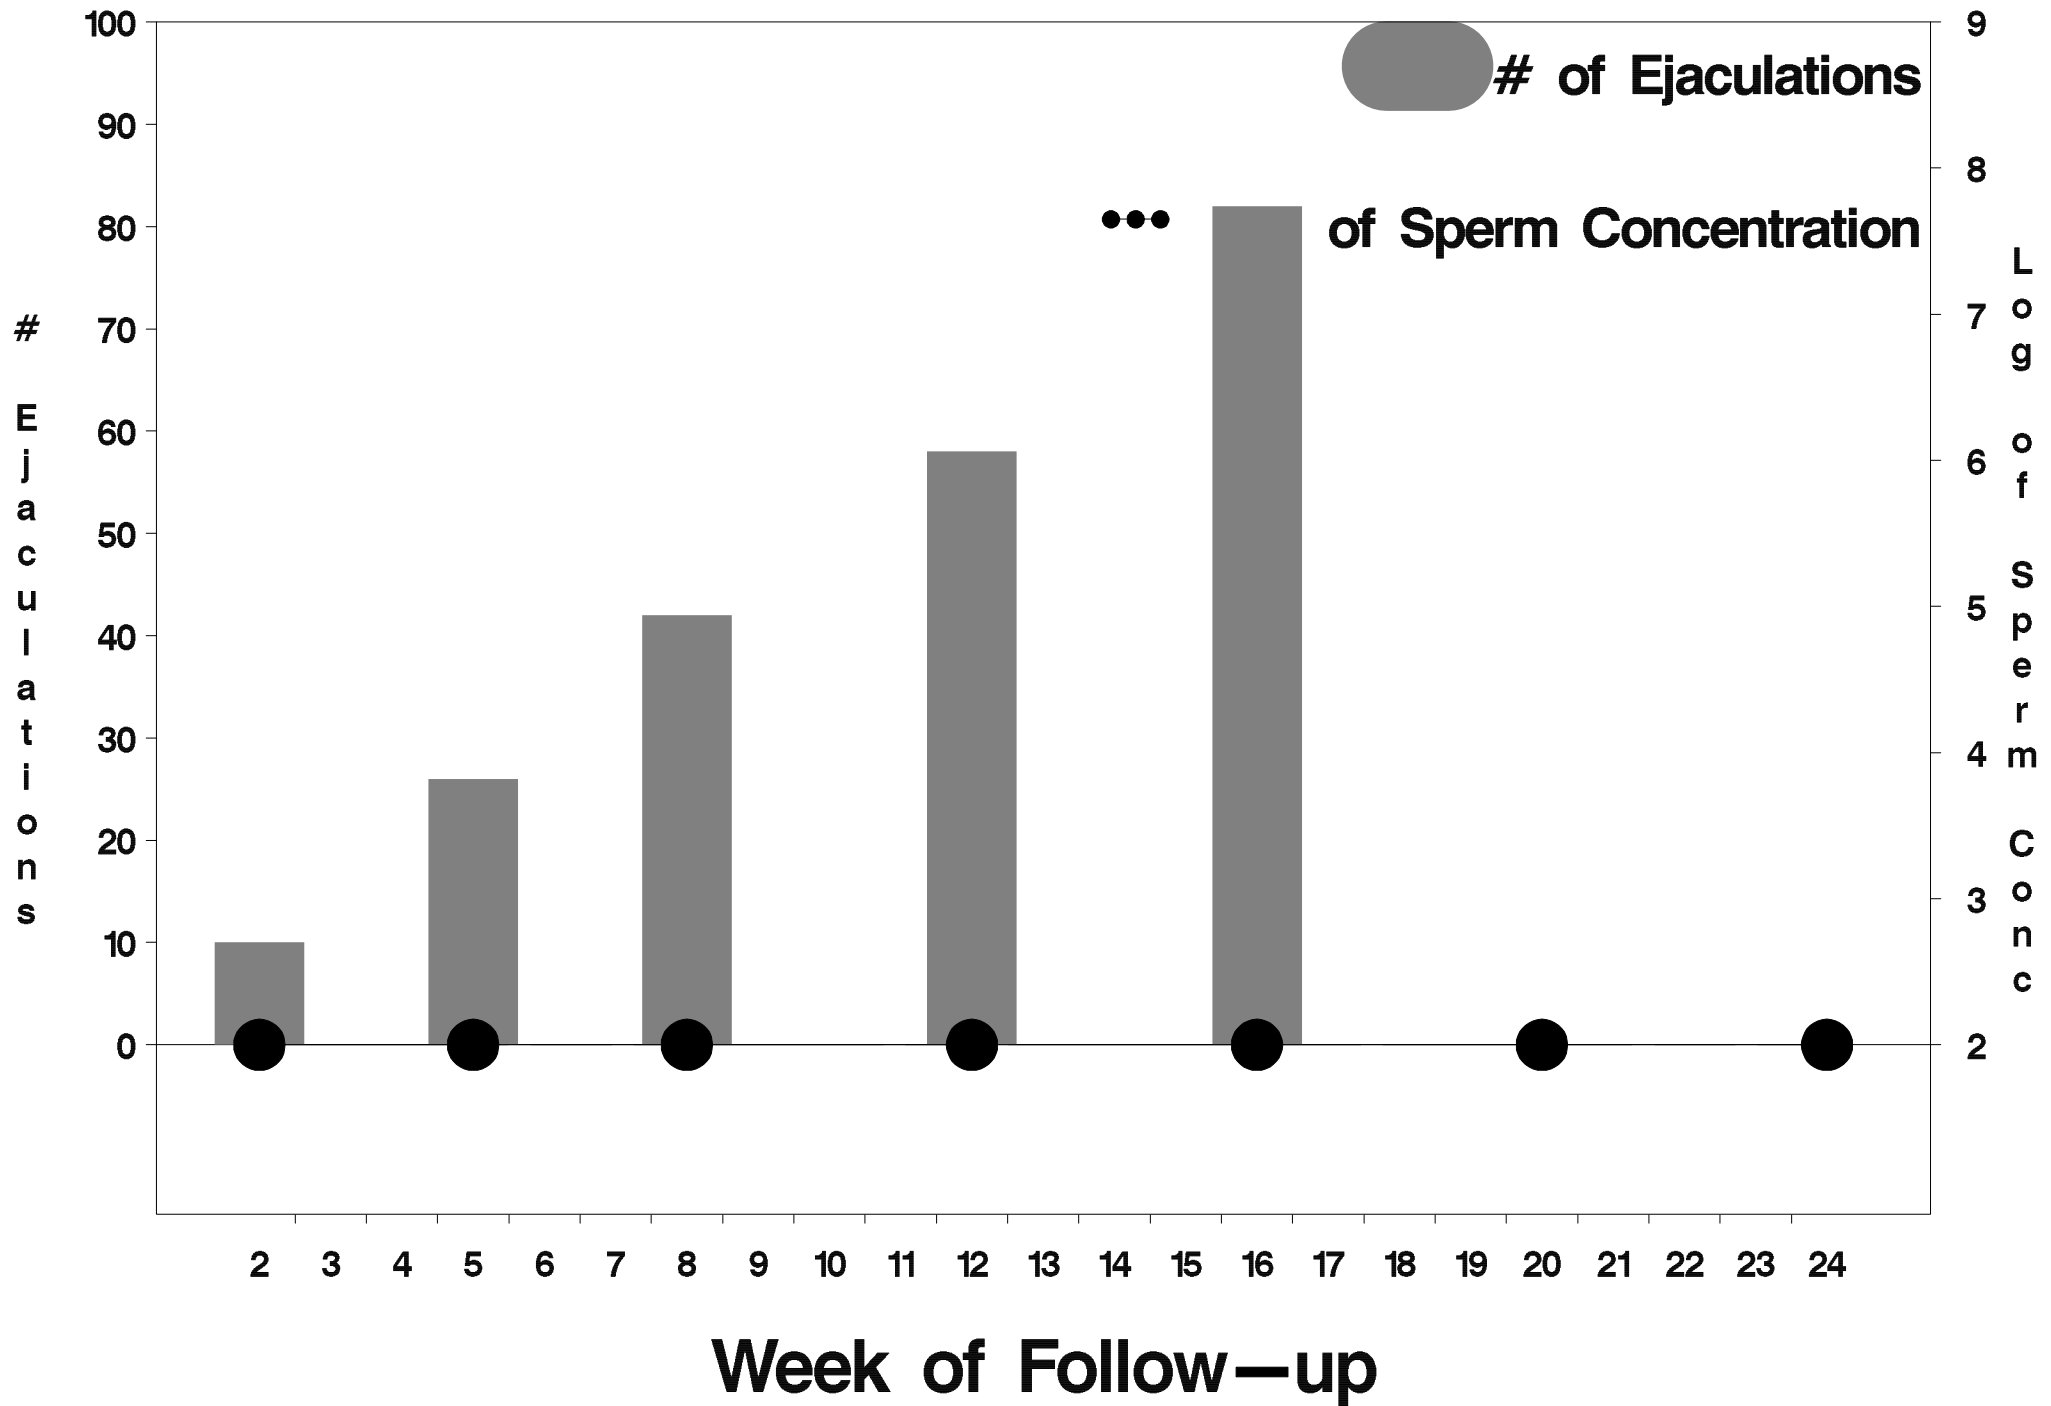

# Participant number= 568

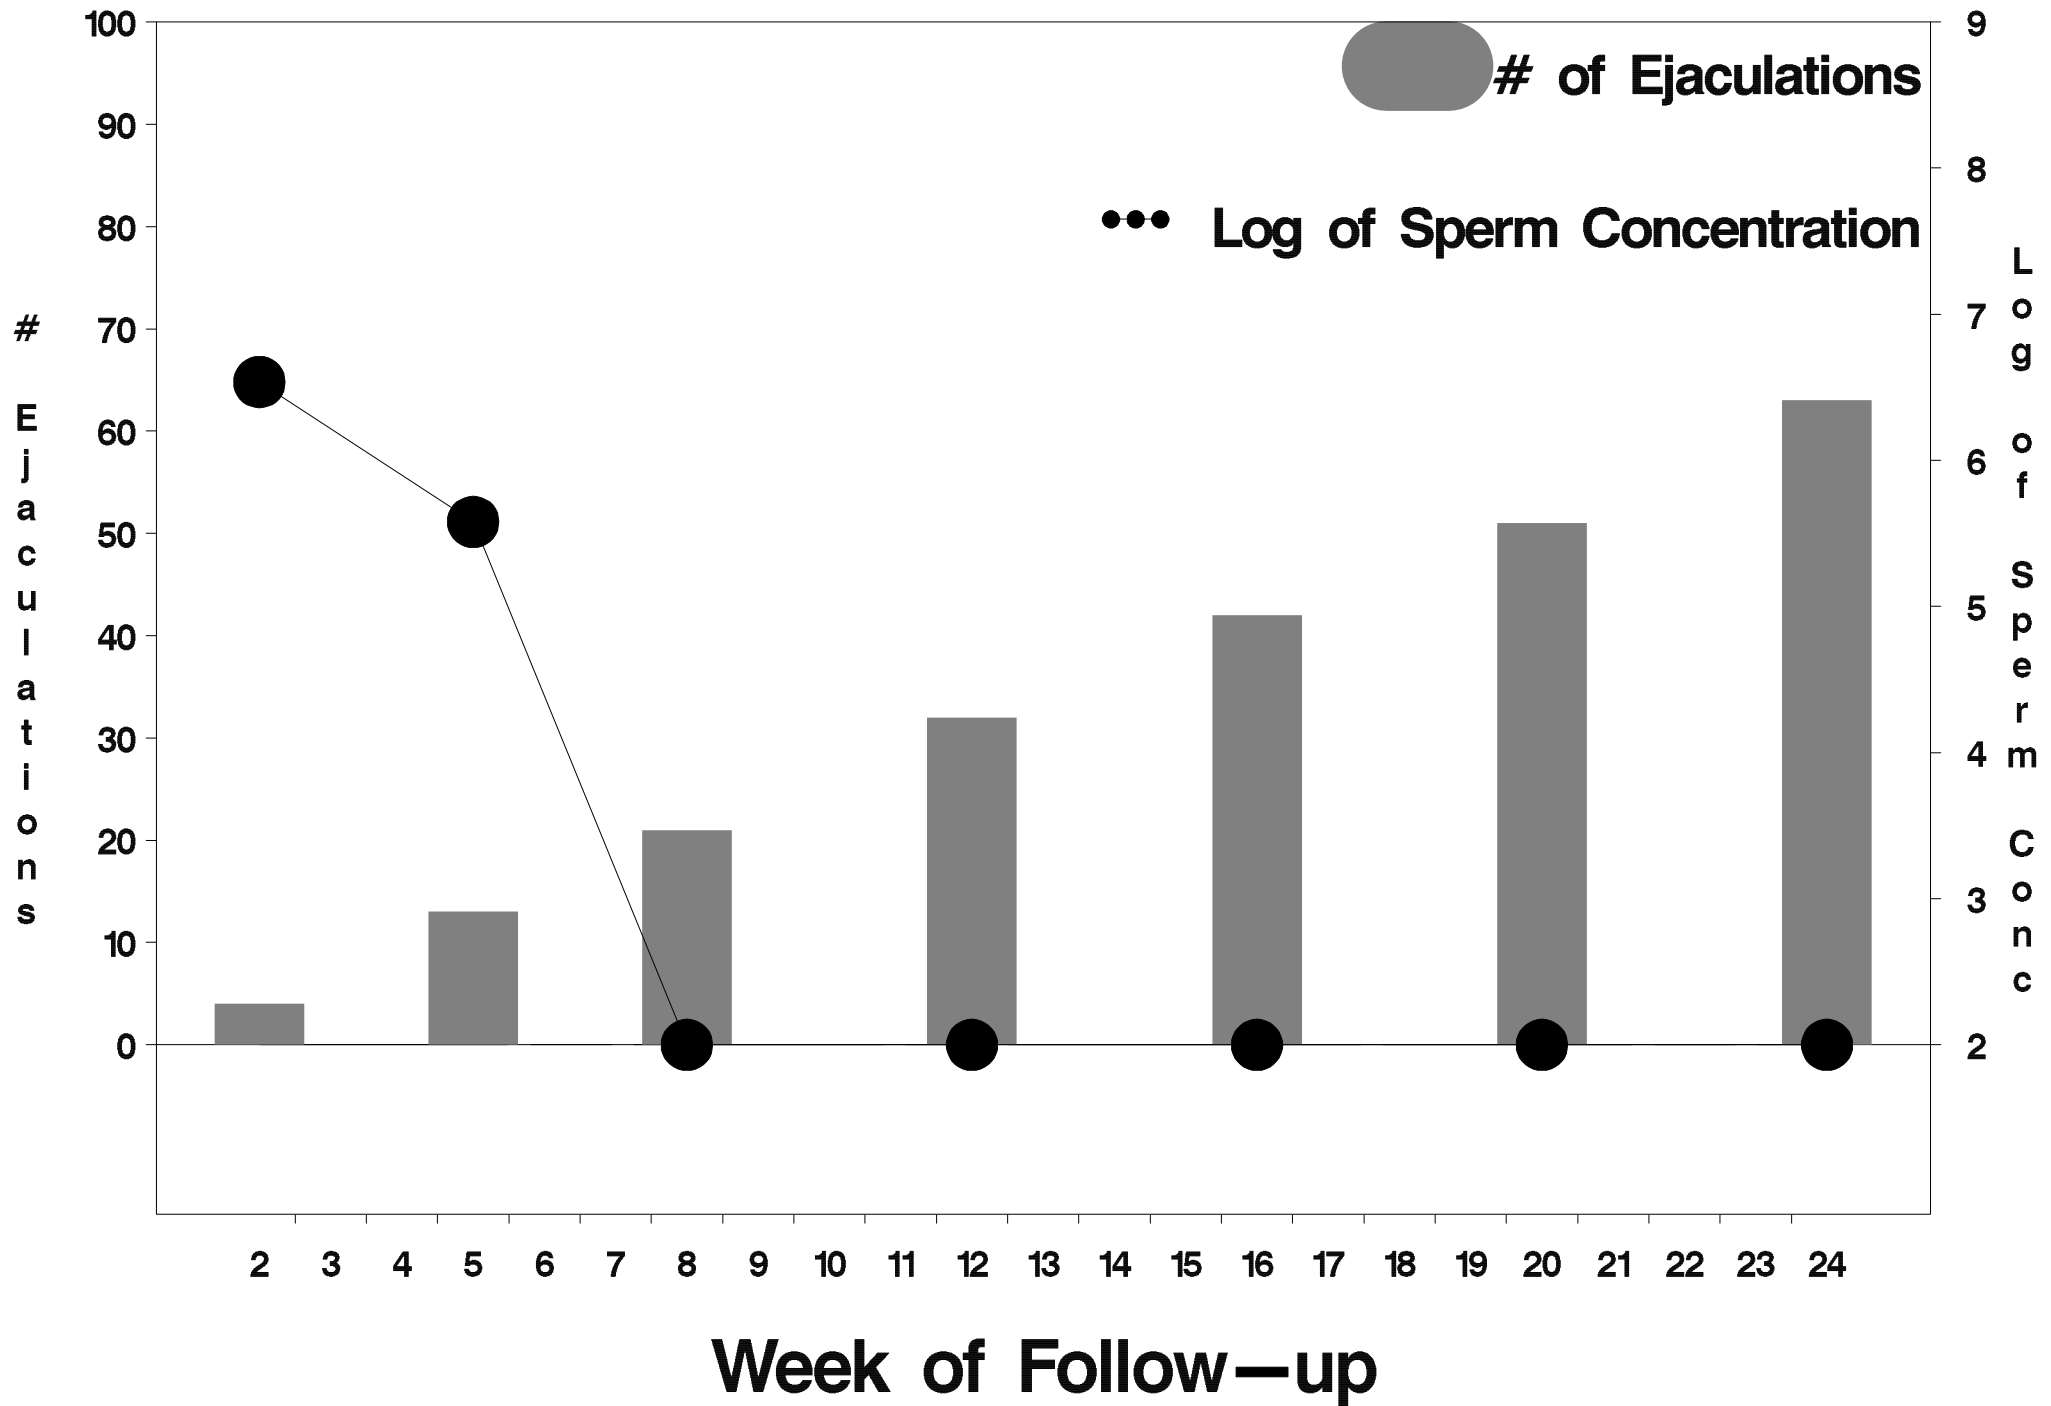

# Participant number= 569

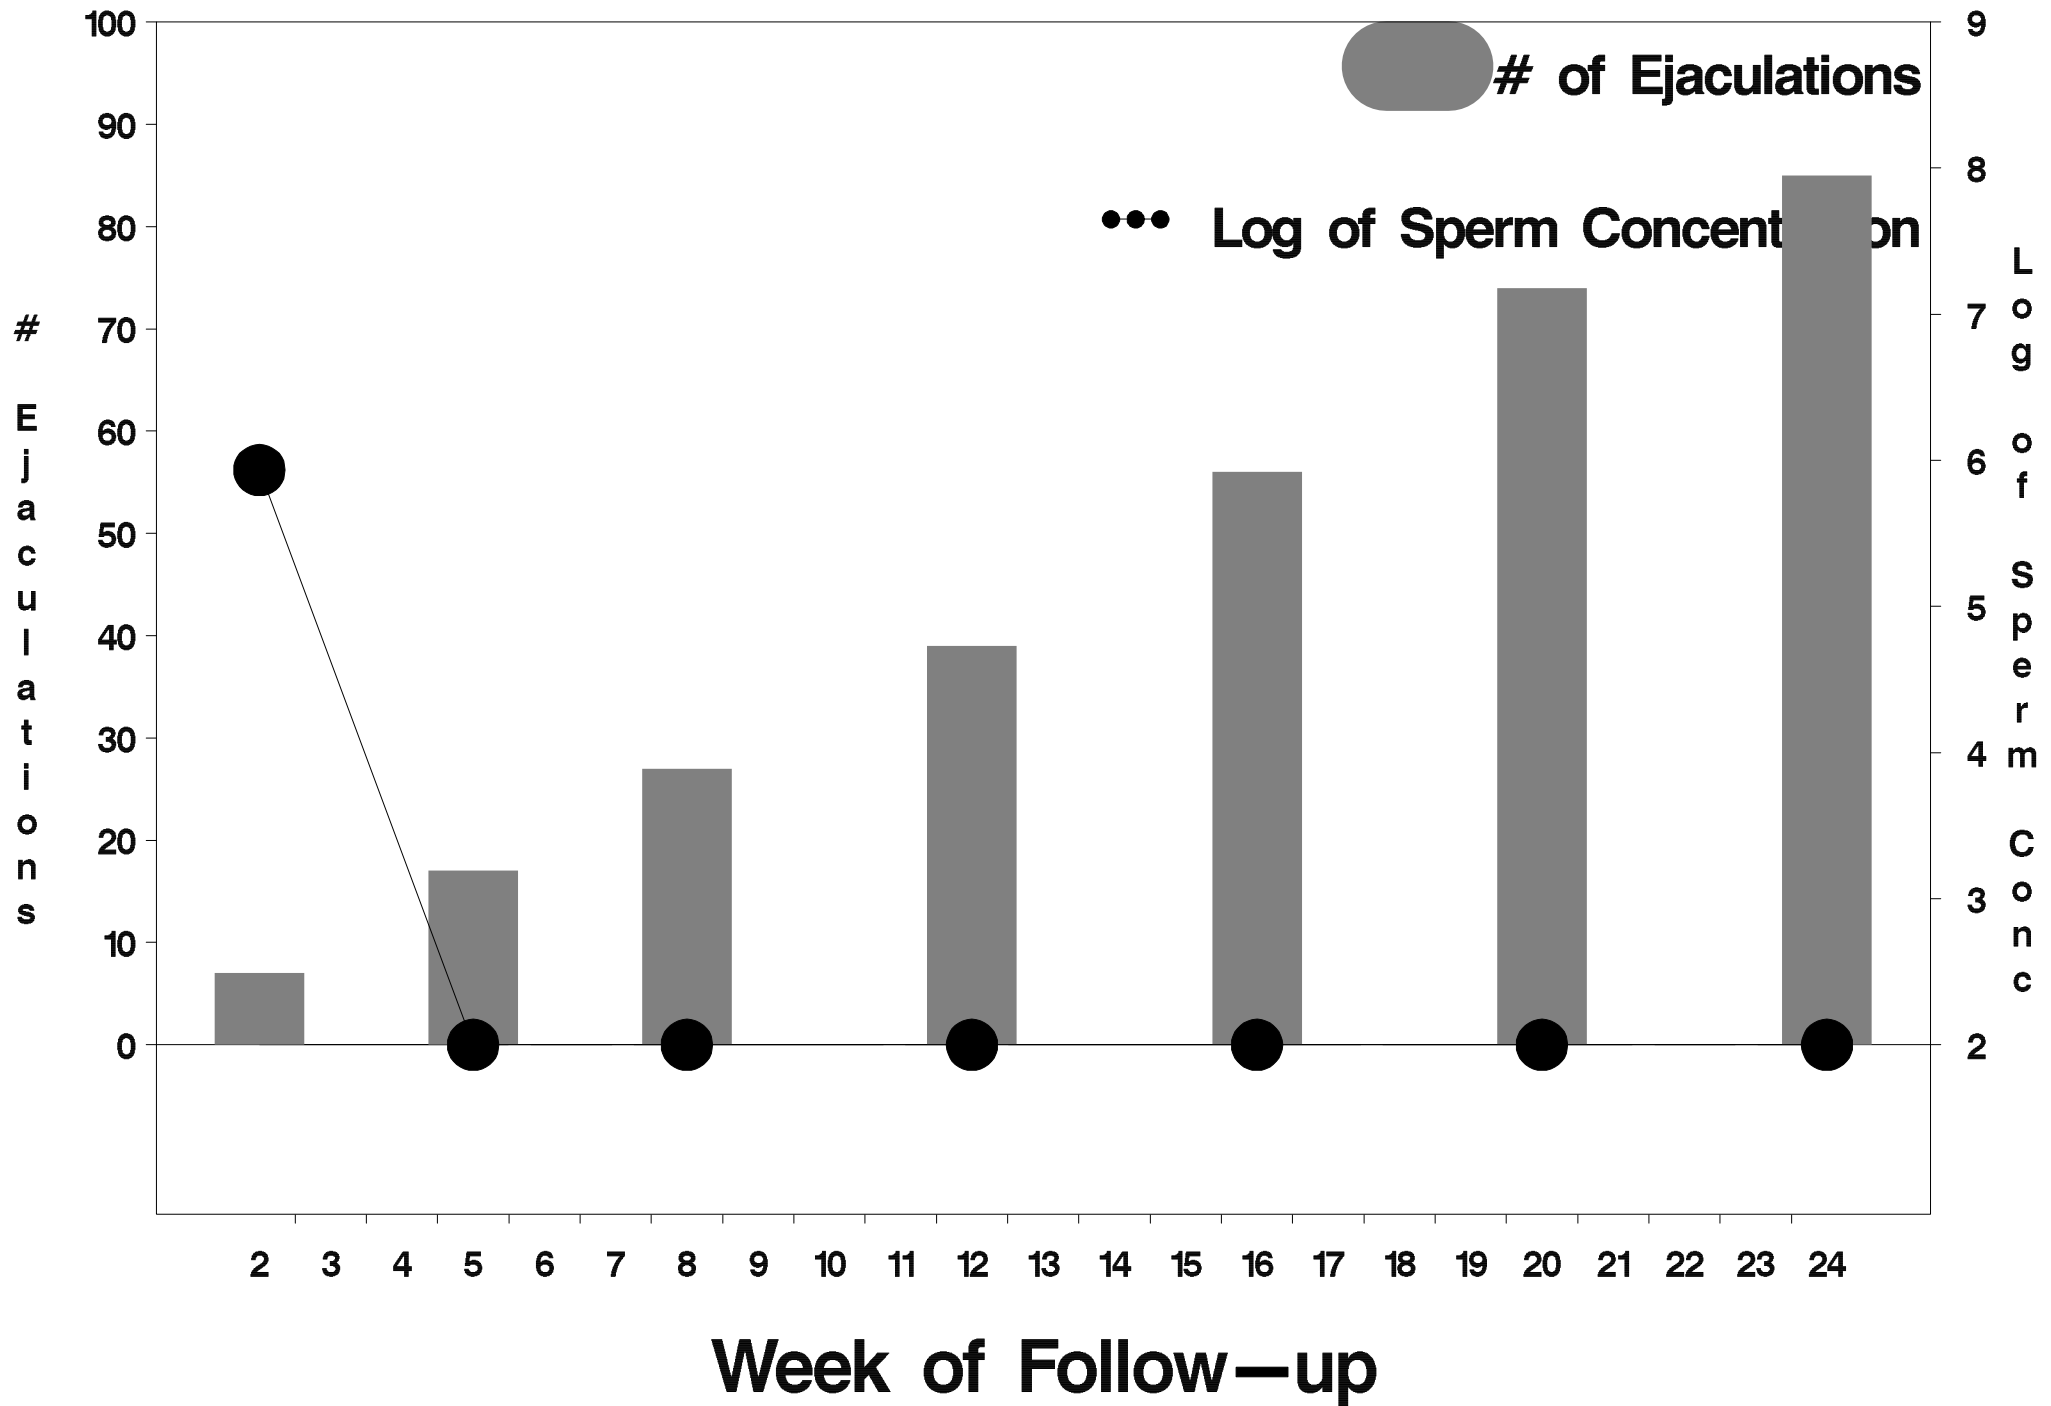

# Participant number= 570

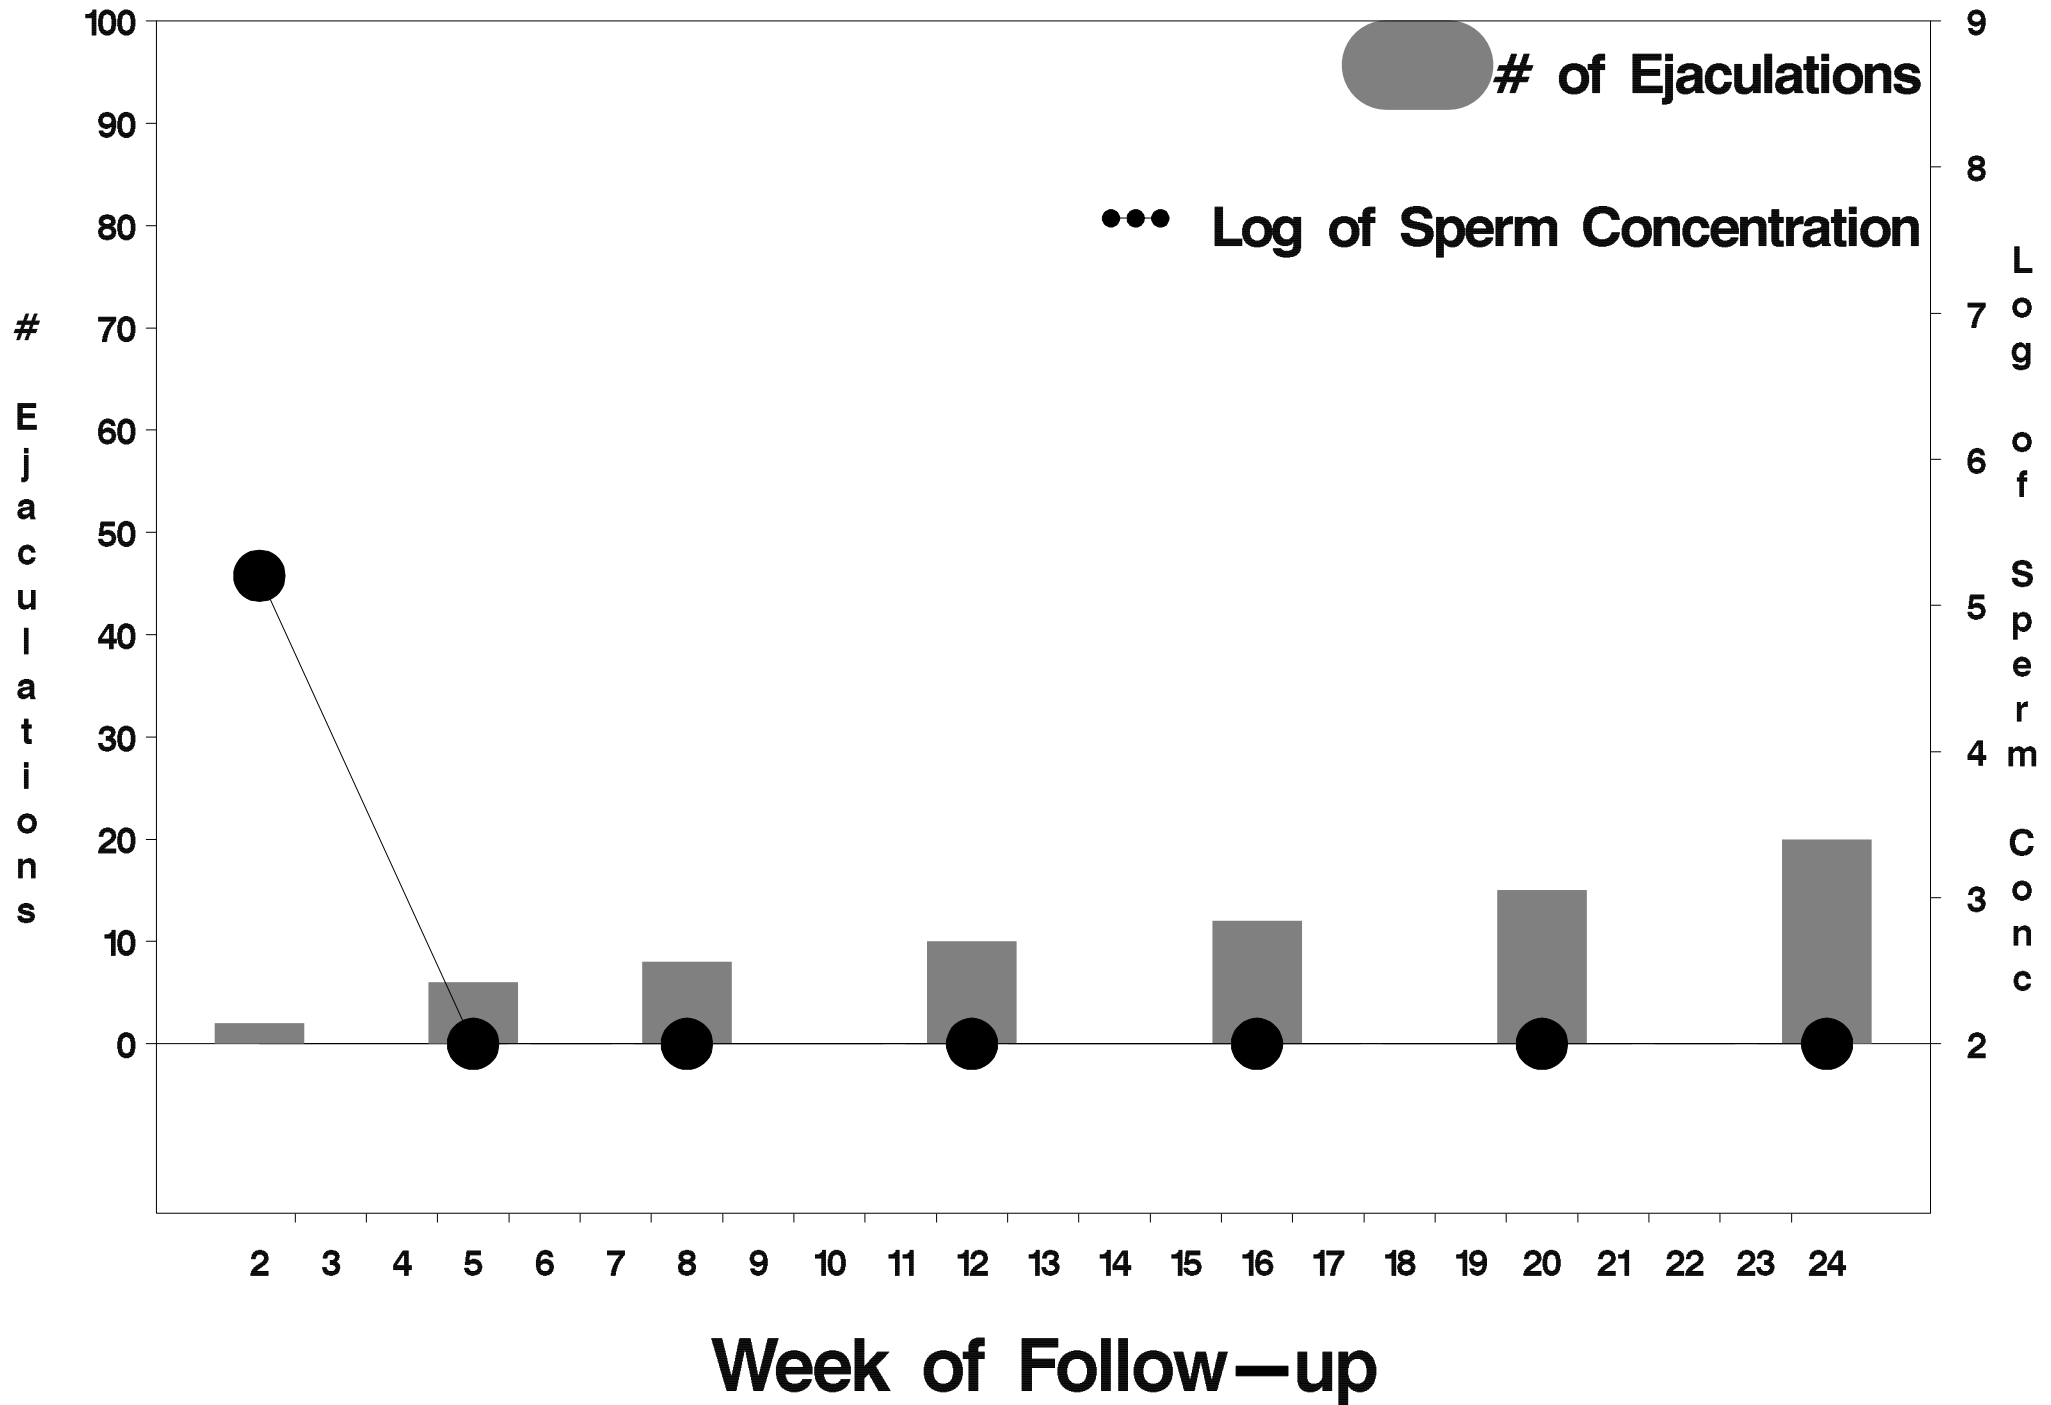

# Participant number= 571

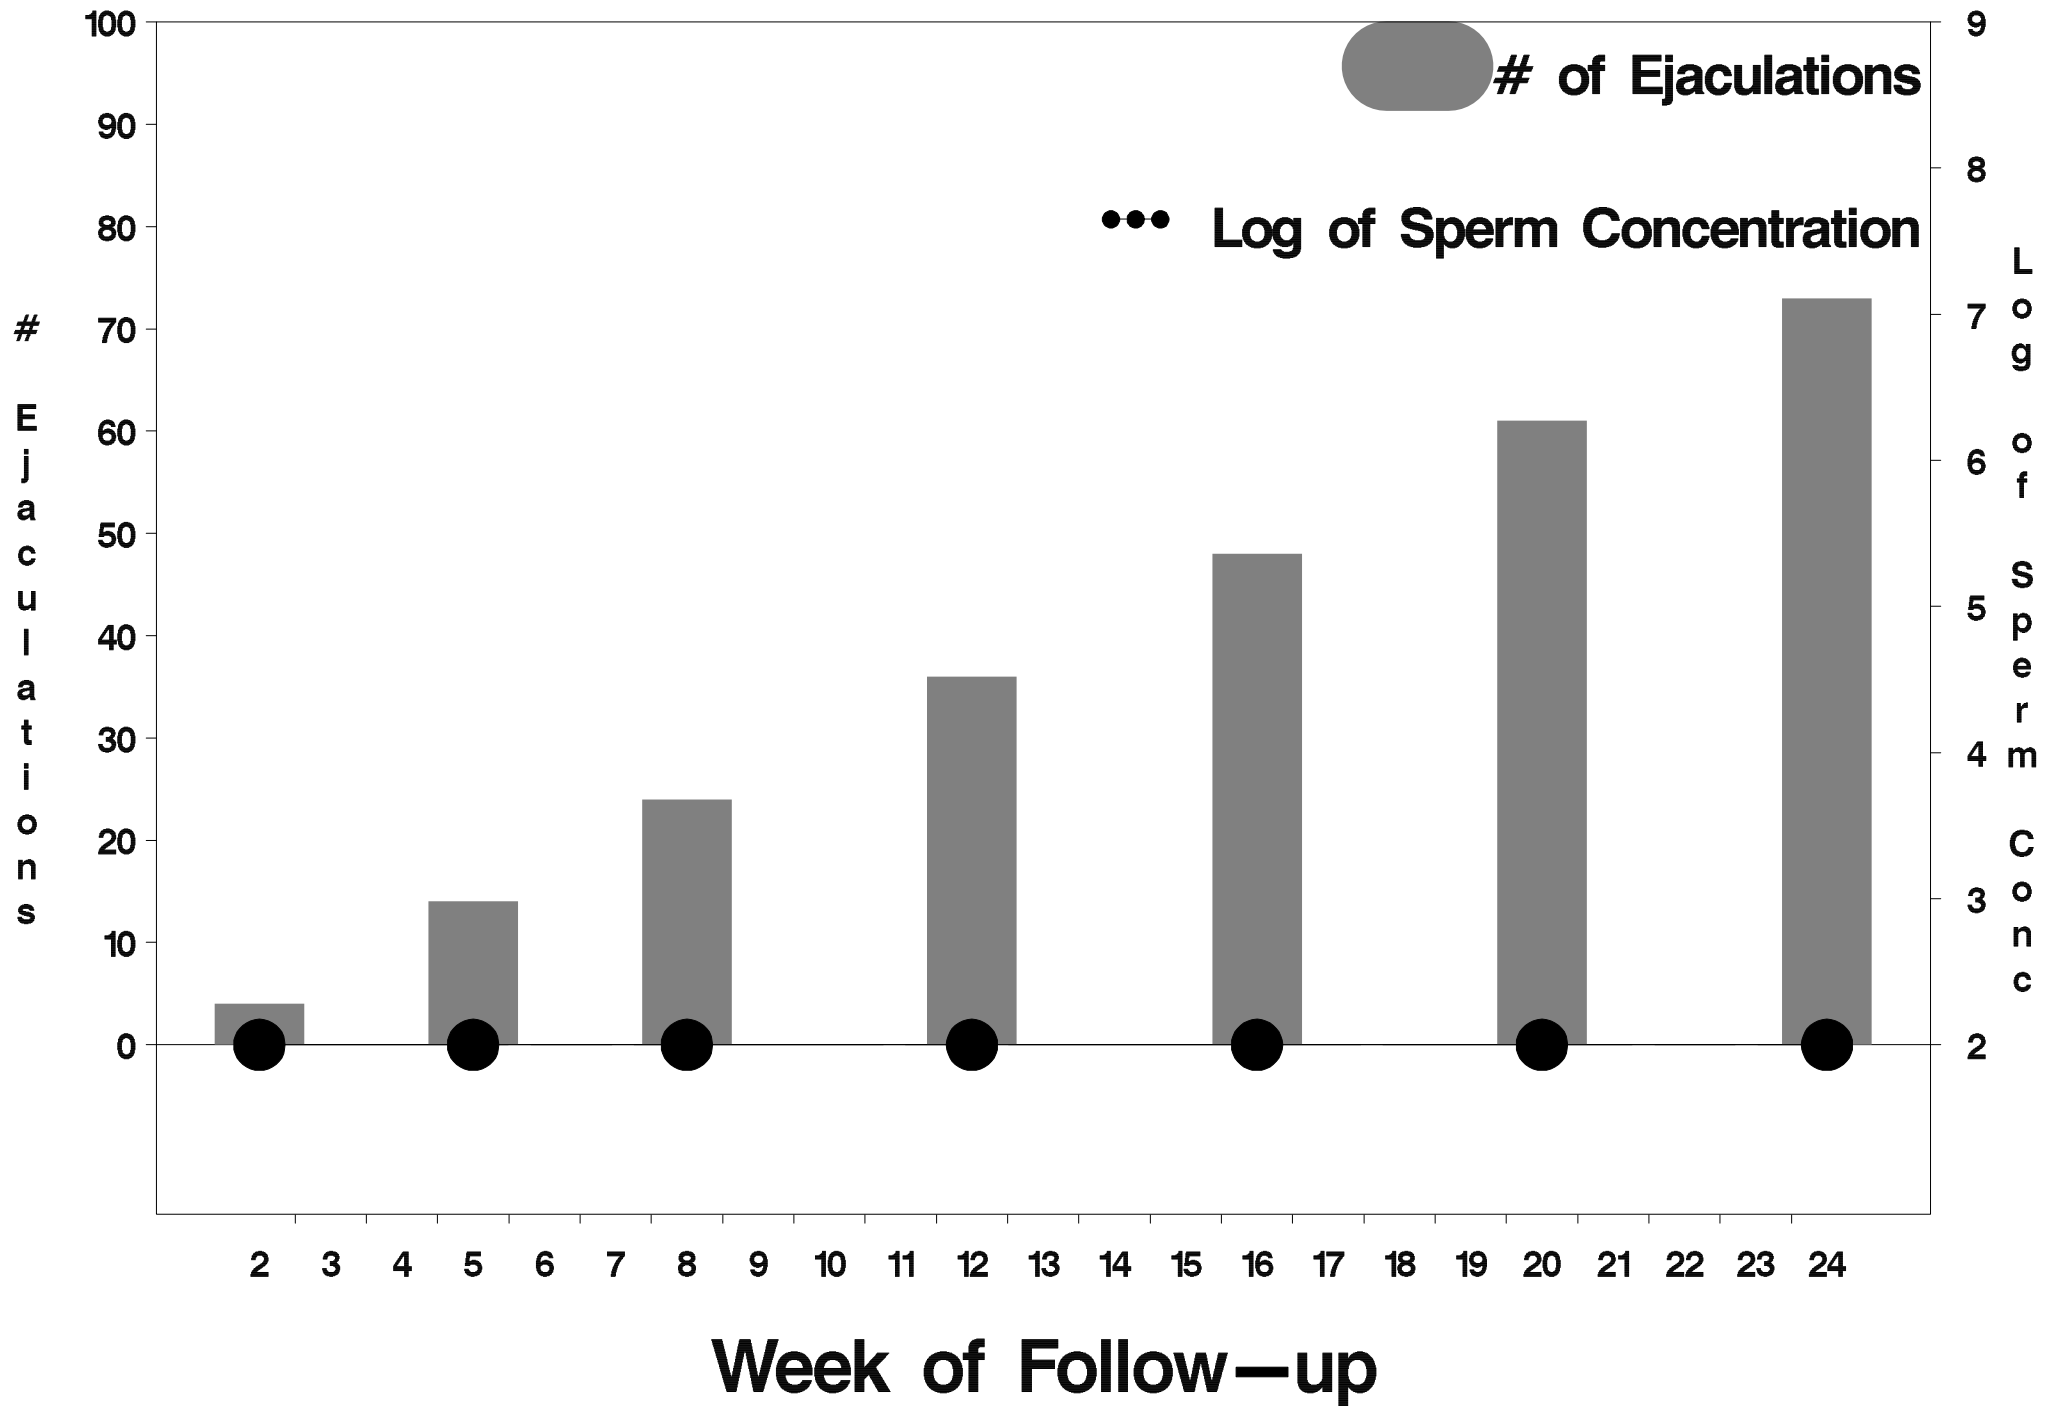



# Participant number= 572

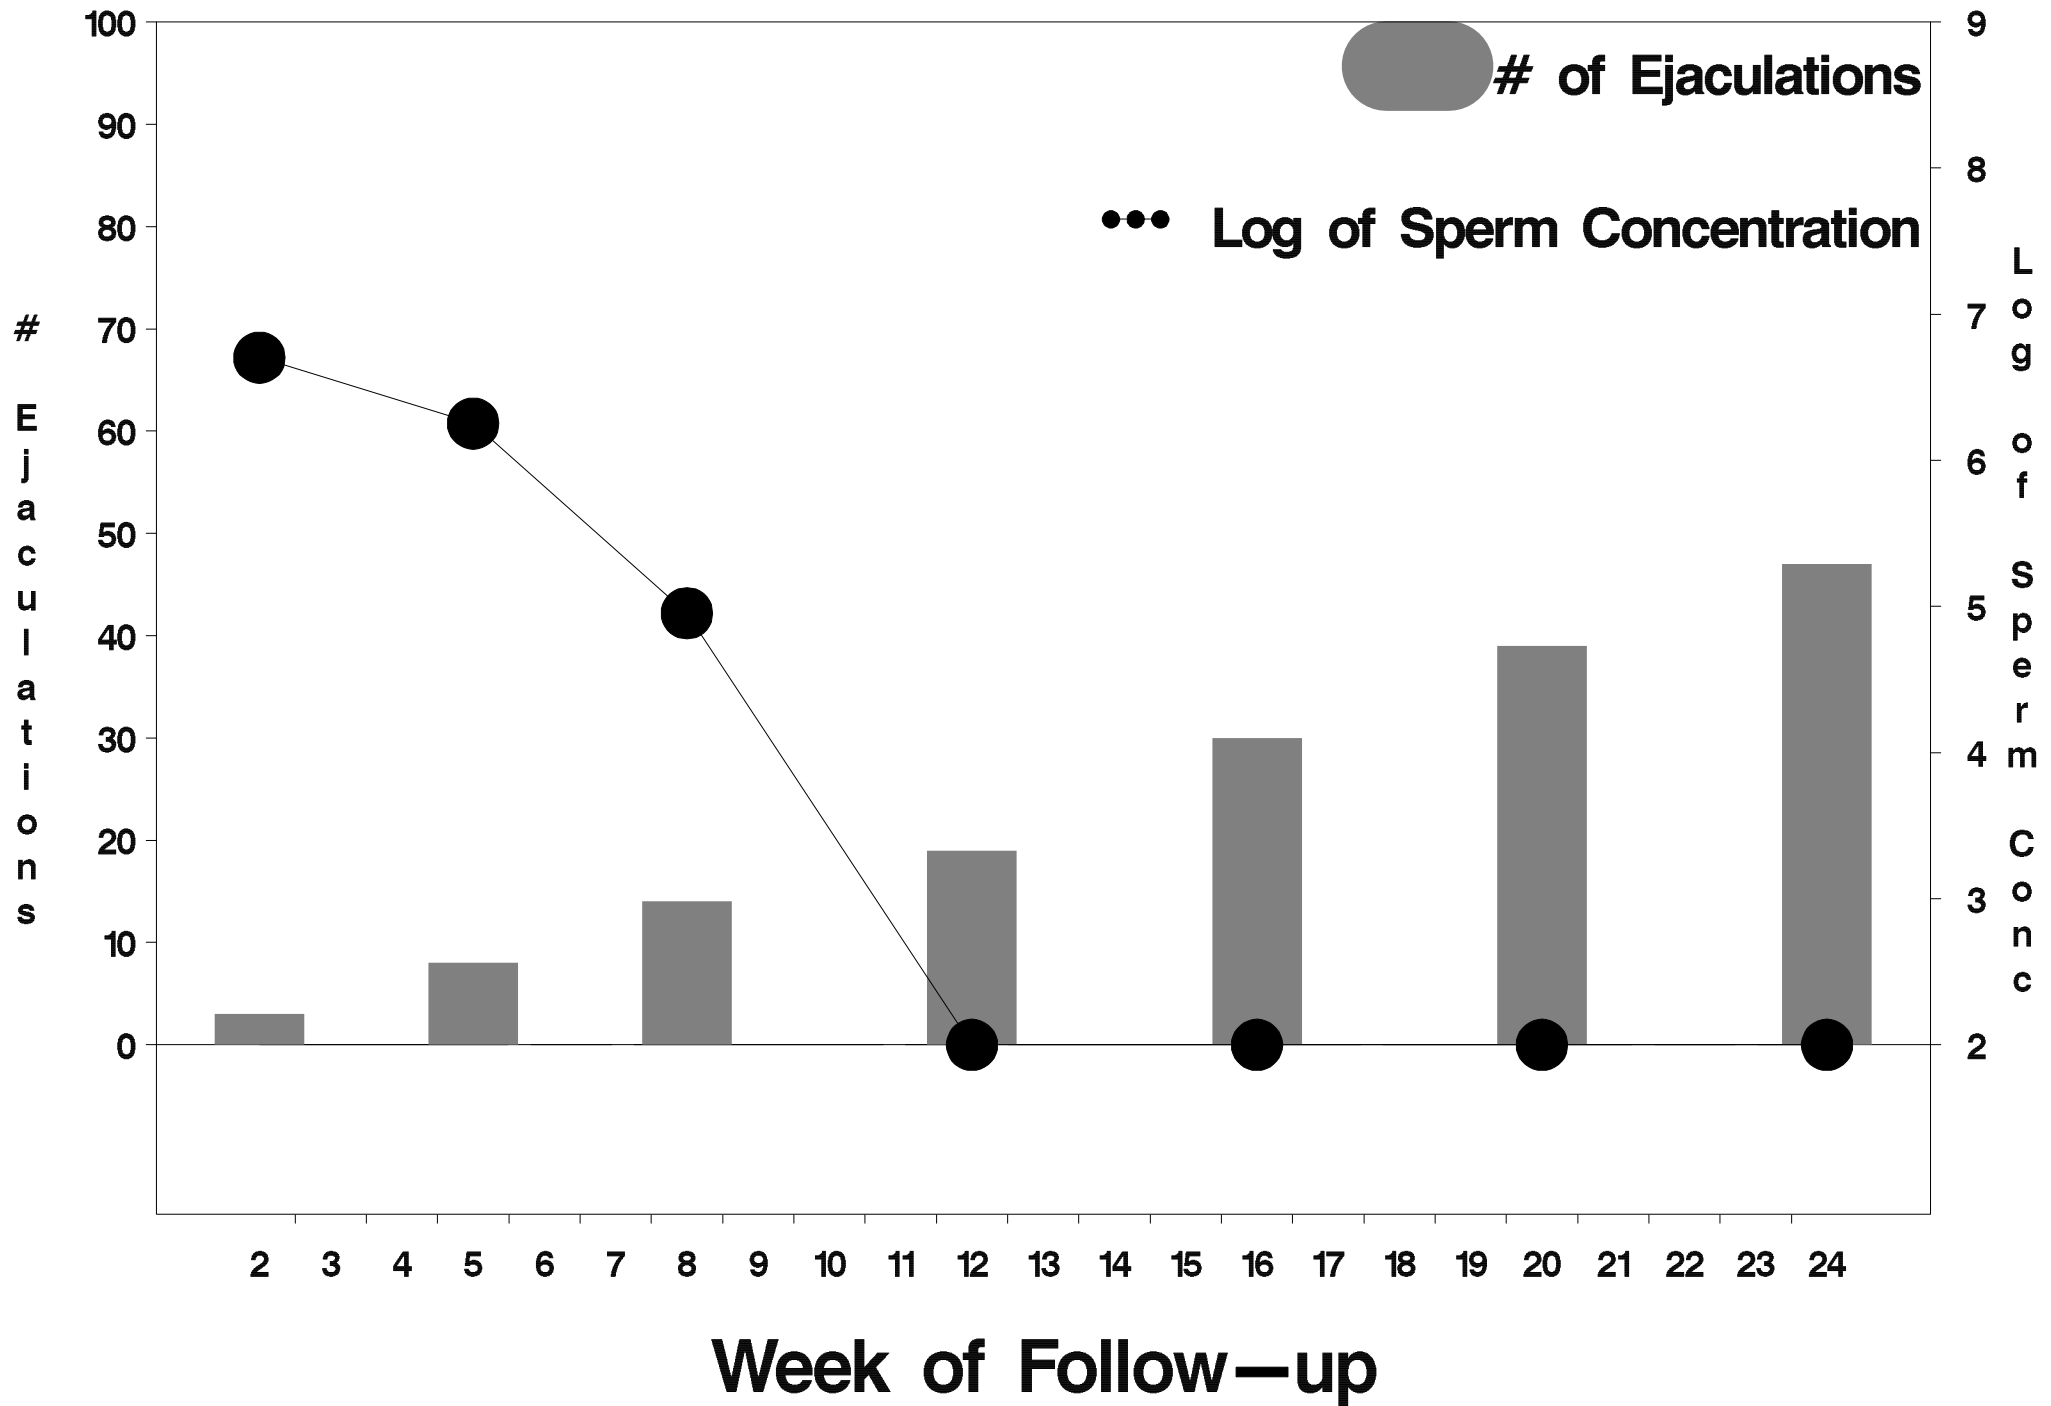

# Participant number= 573

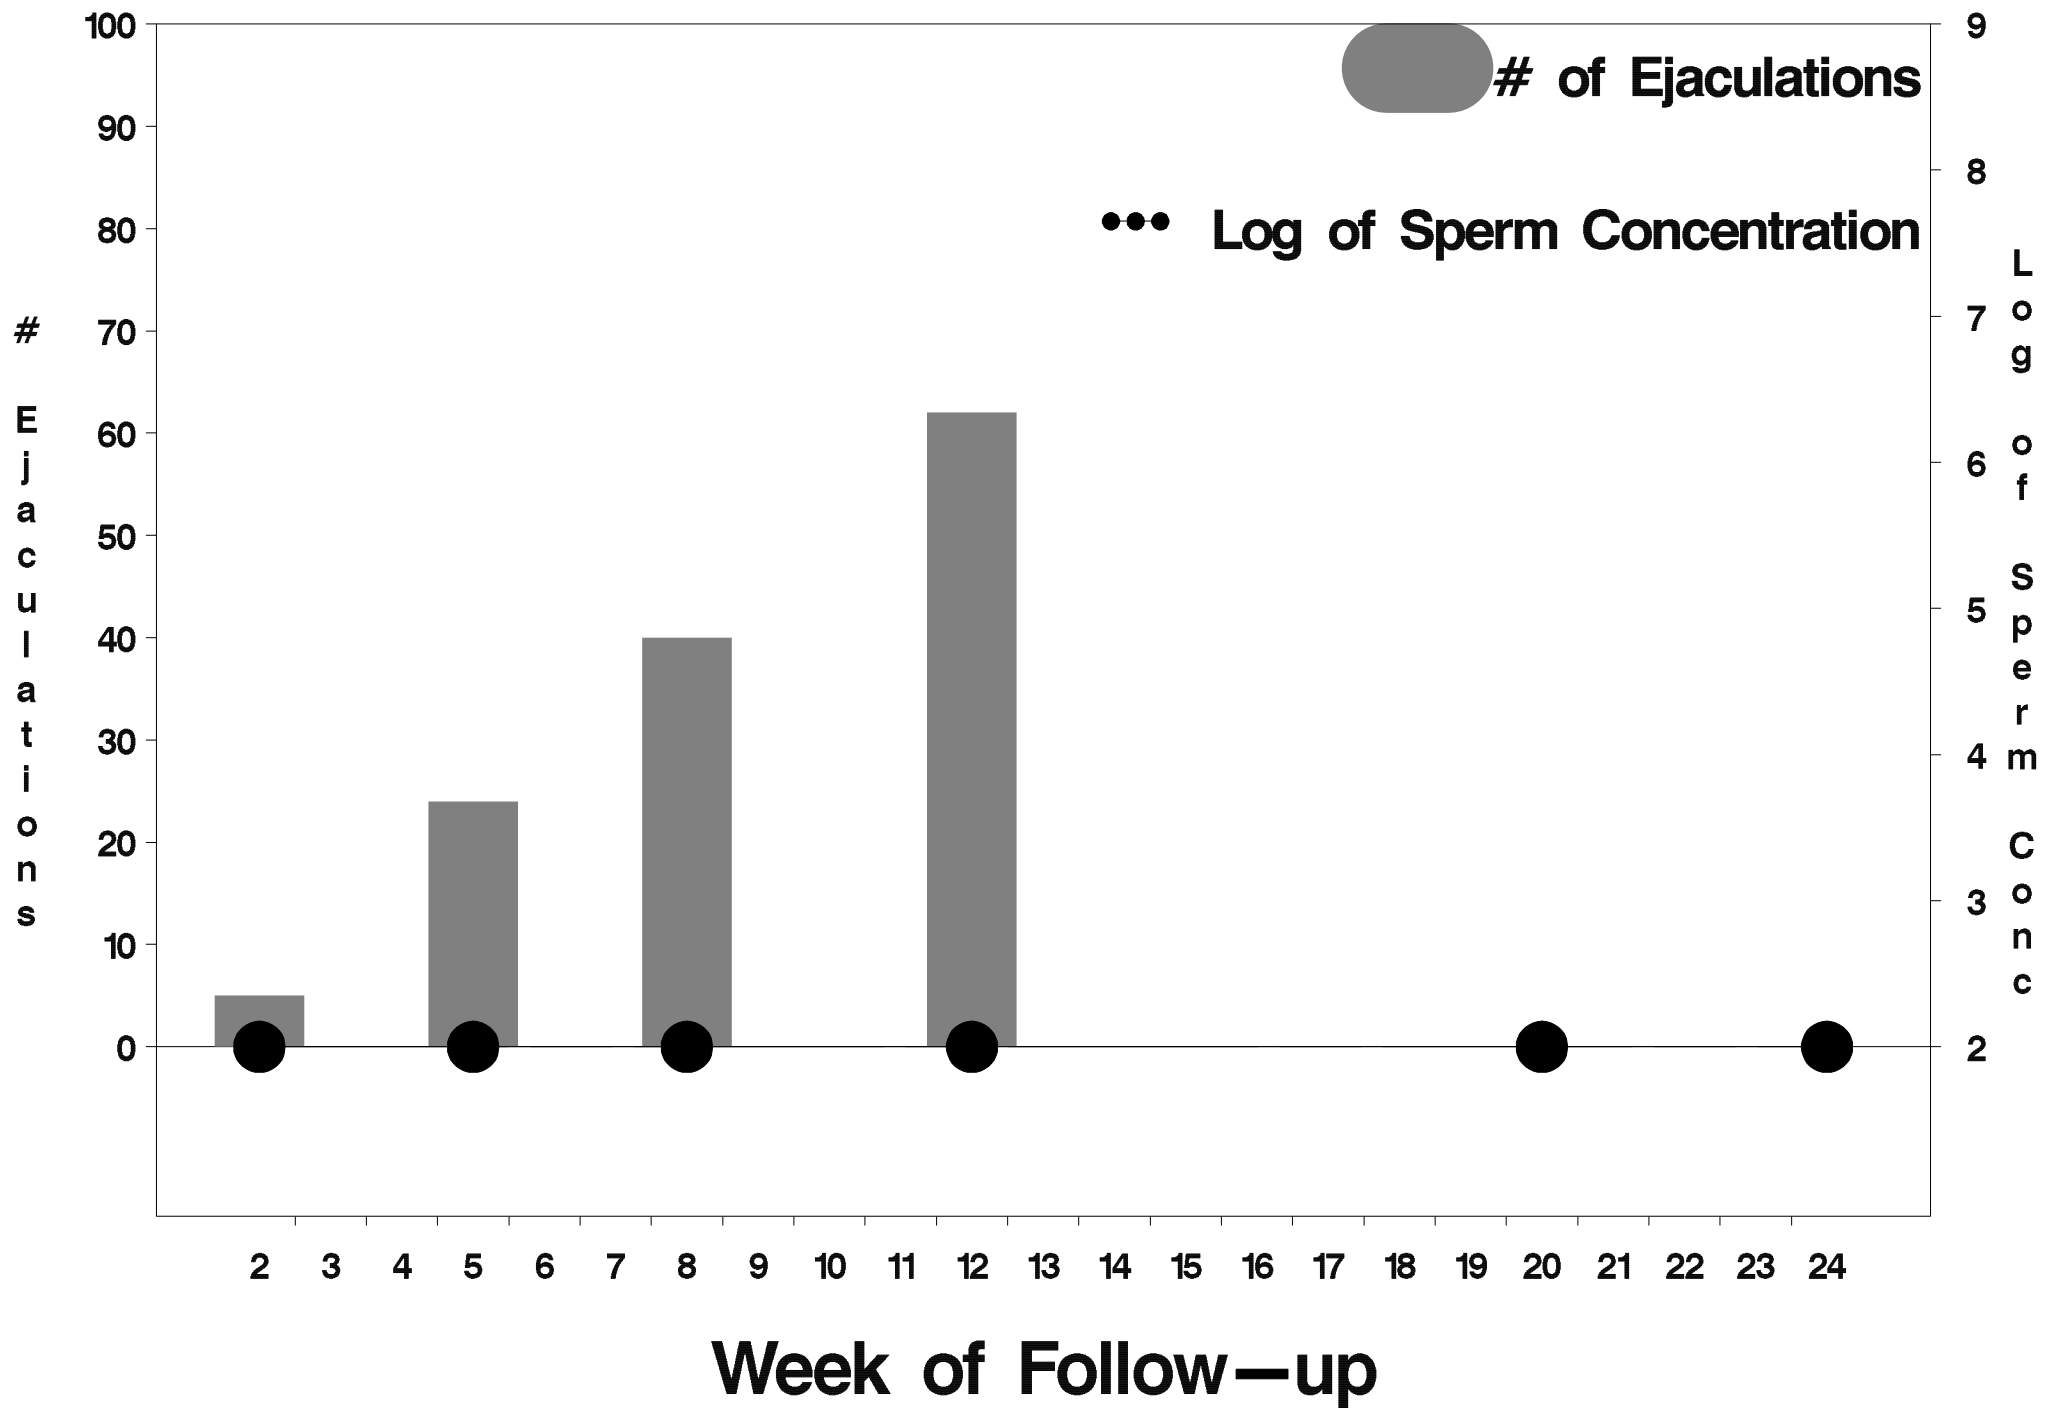

# Participant number= 574

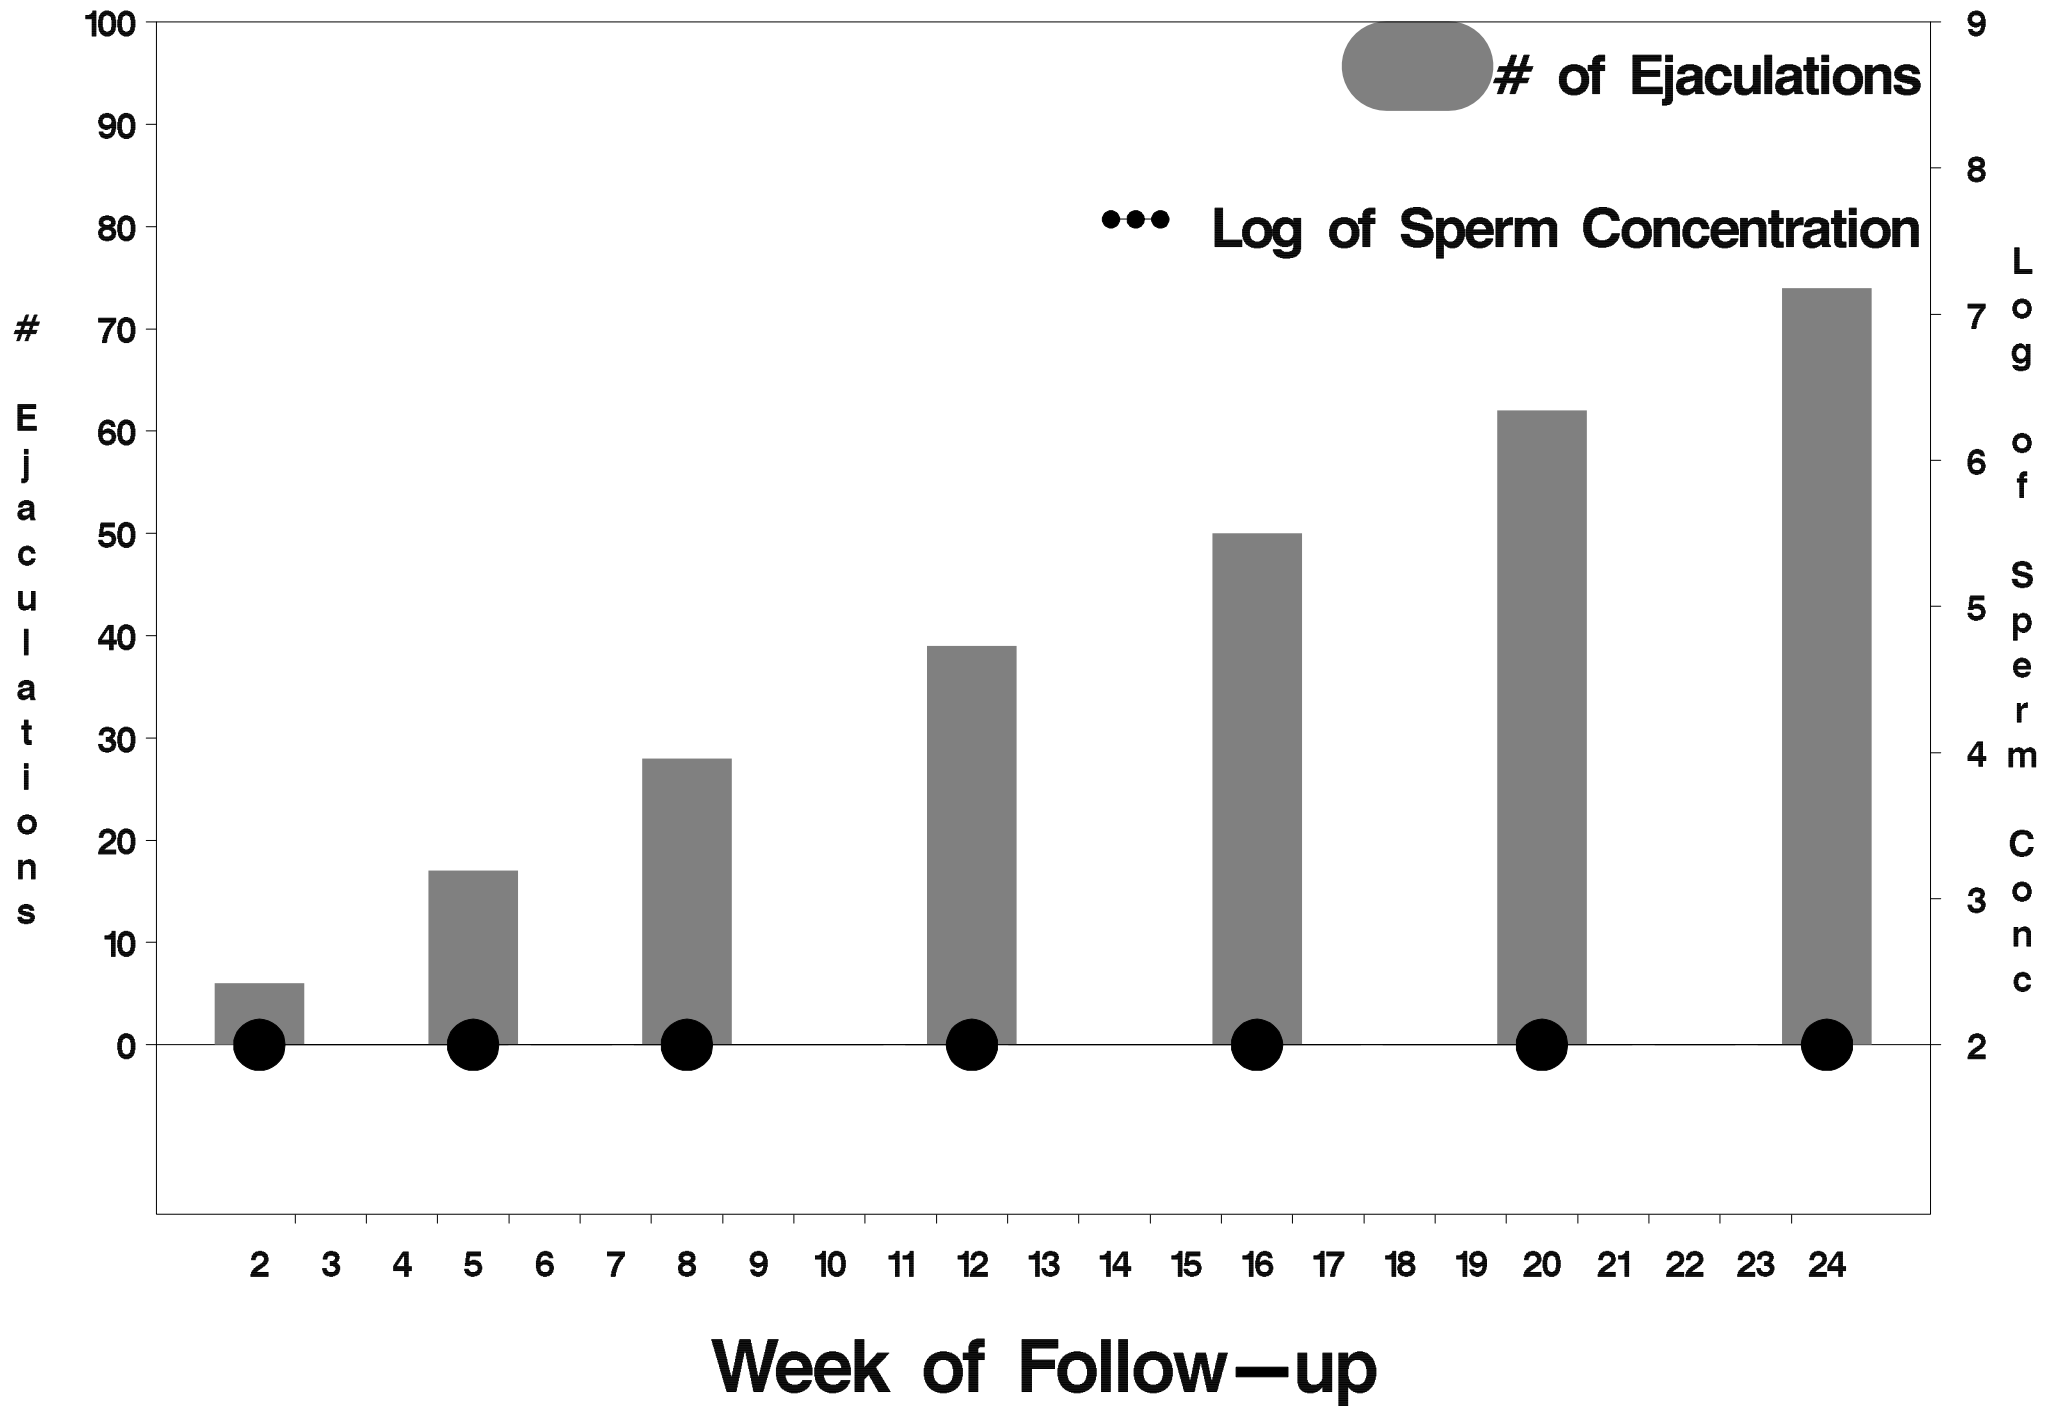

# Participant number= 575

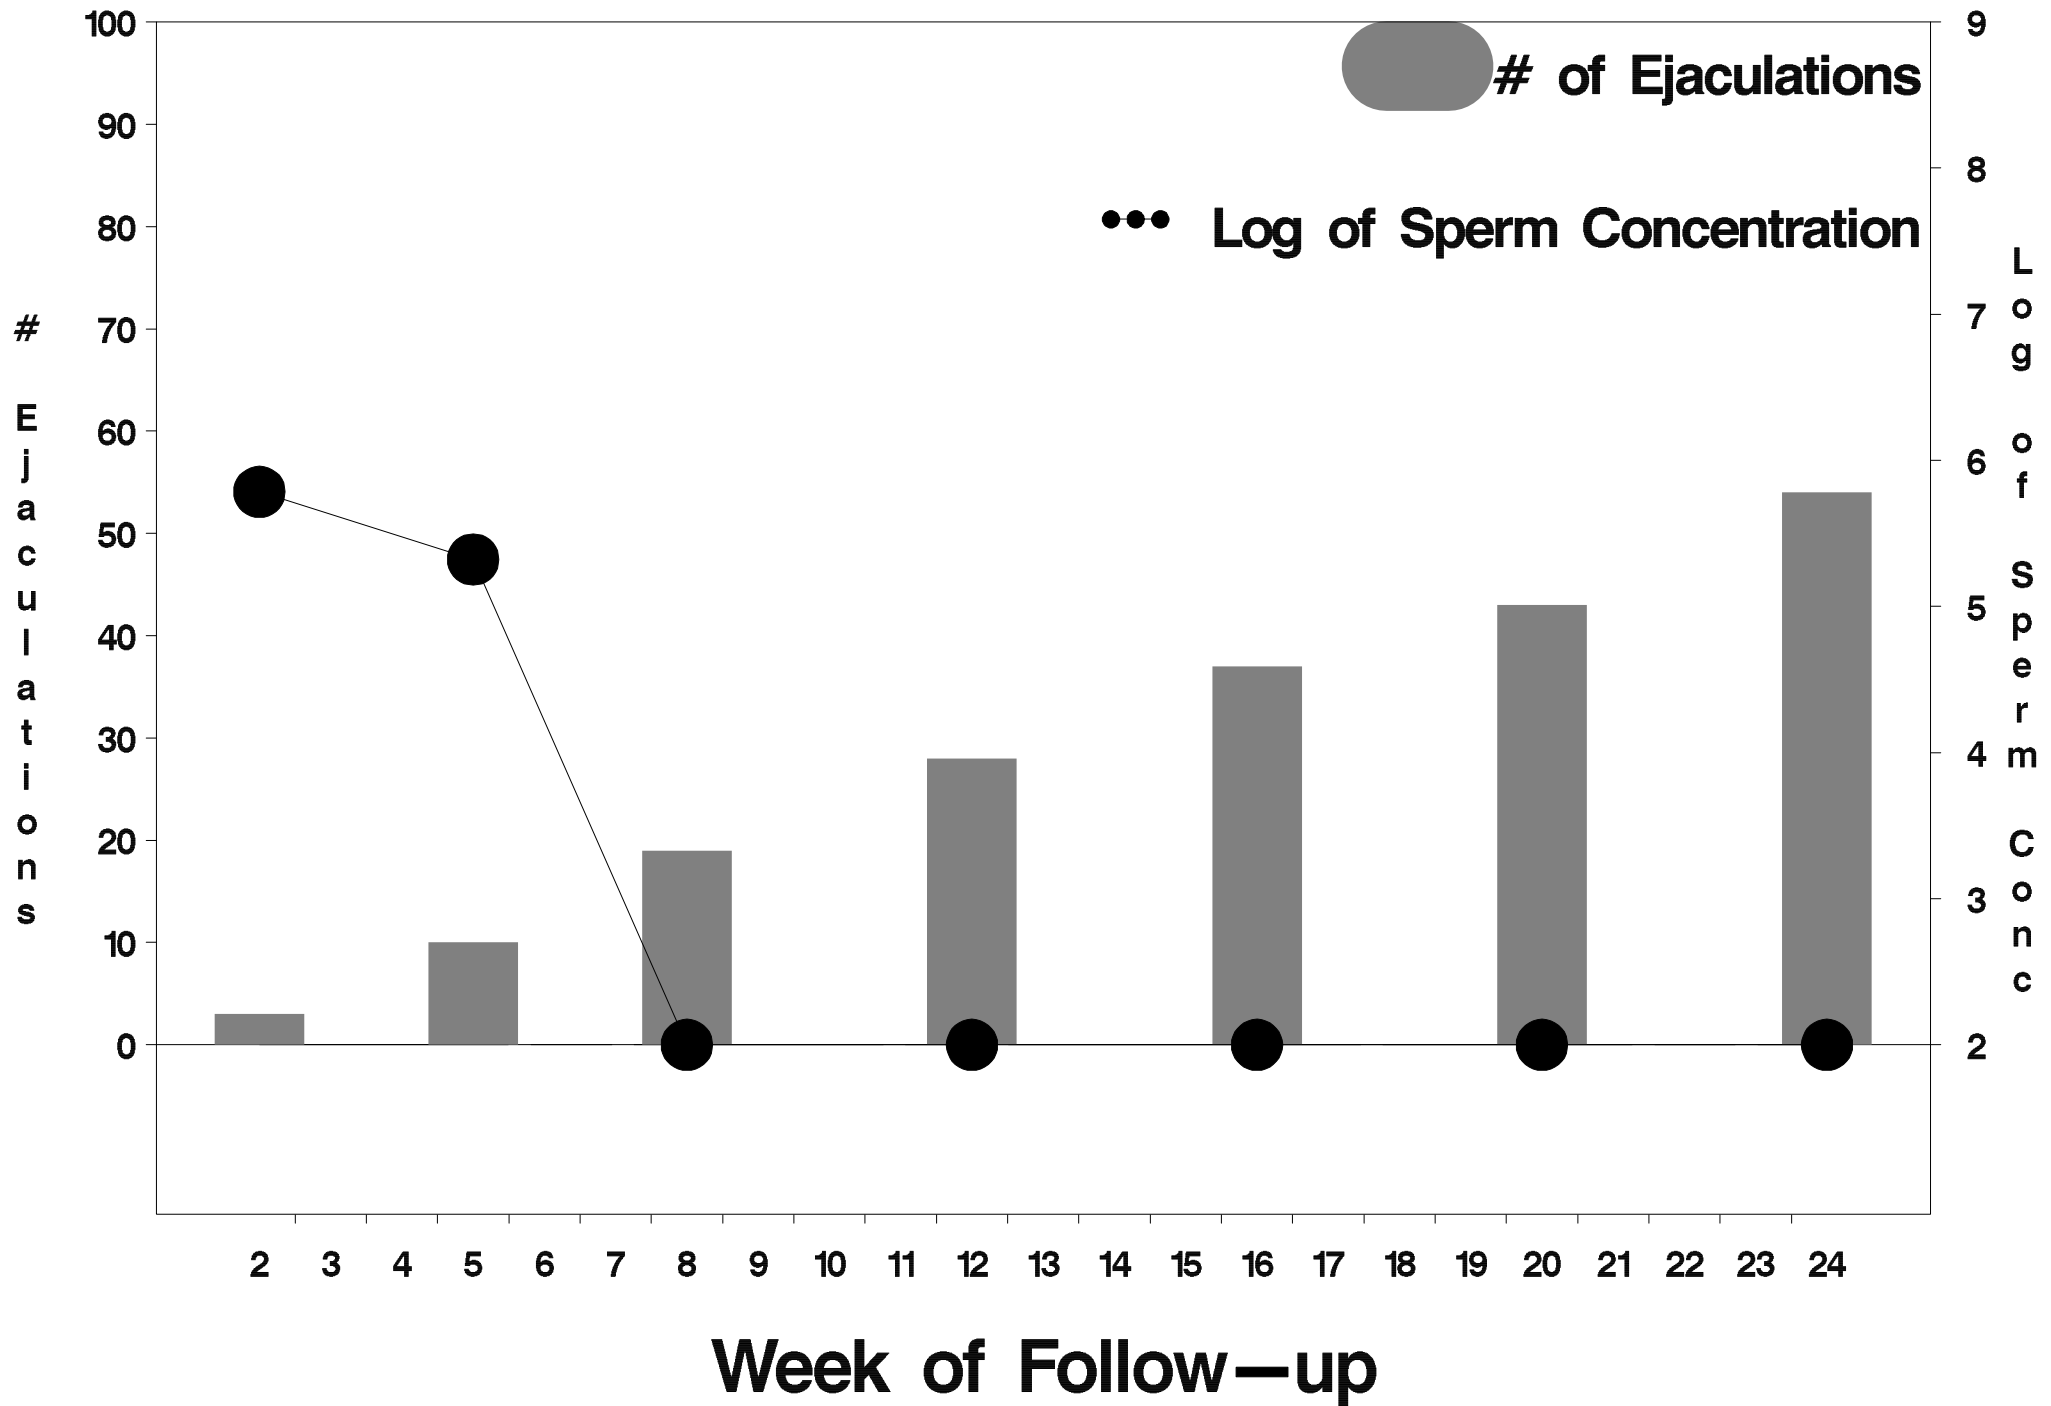

# Participant number= 576

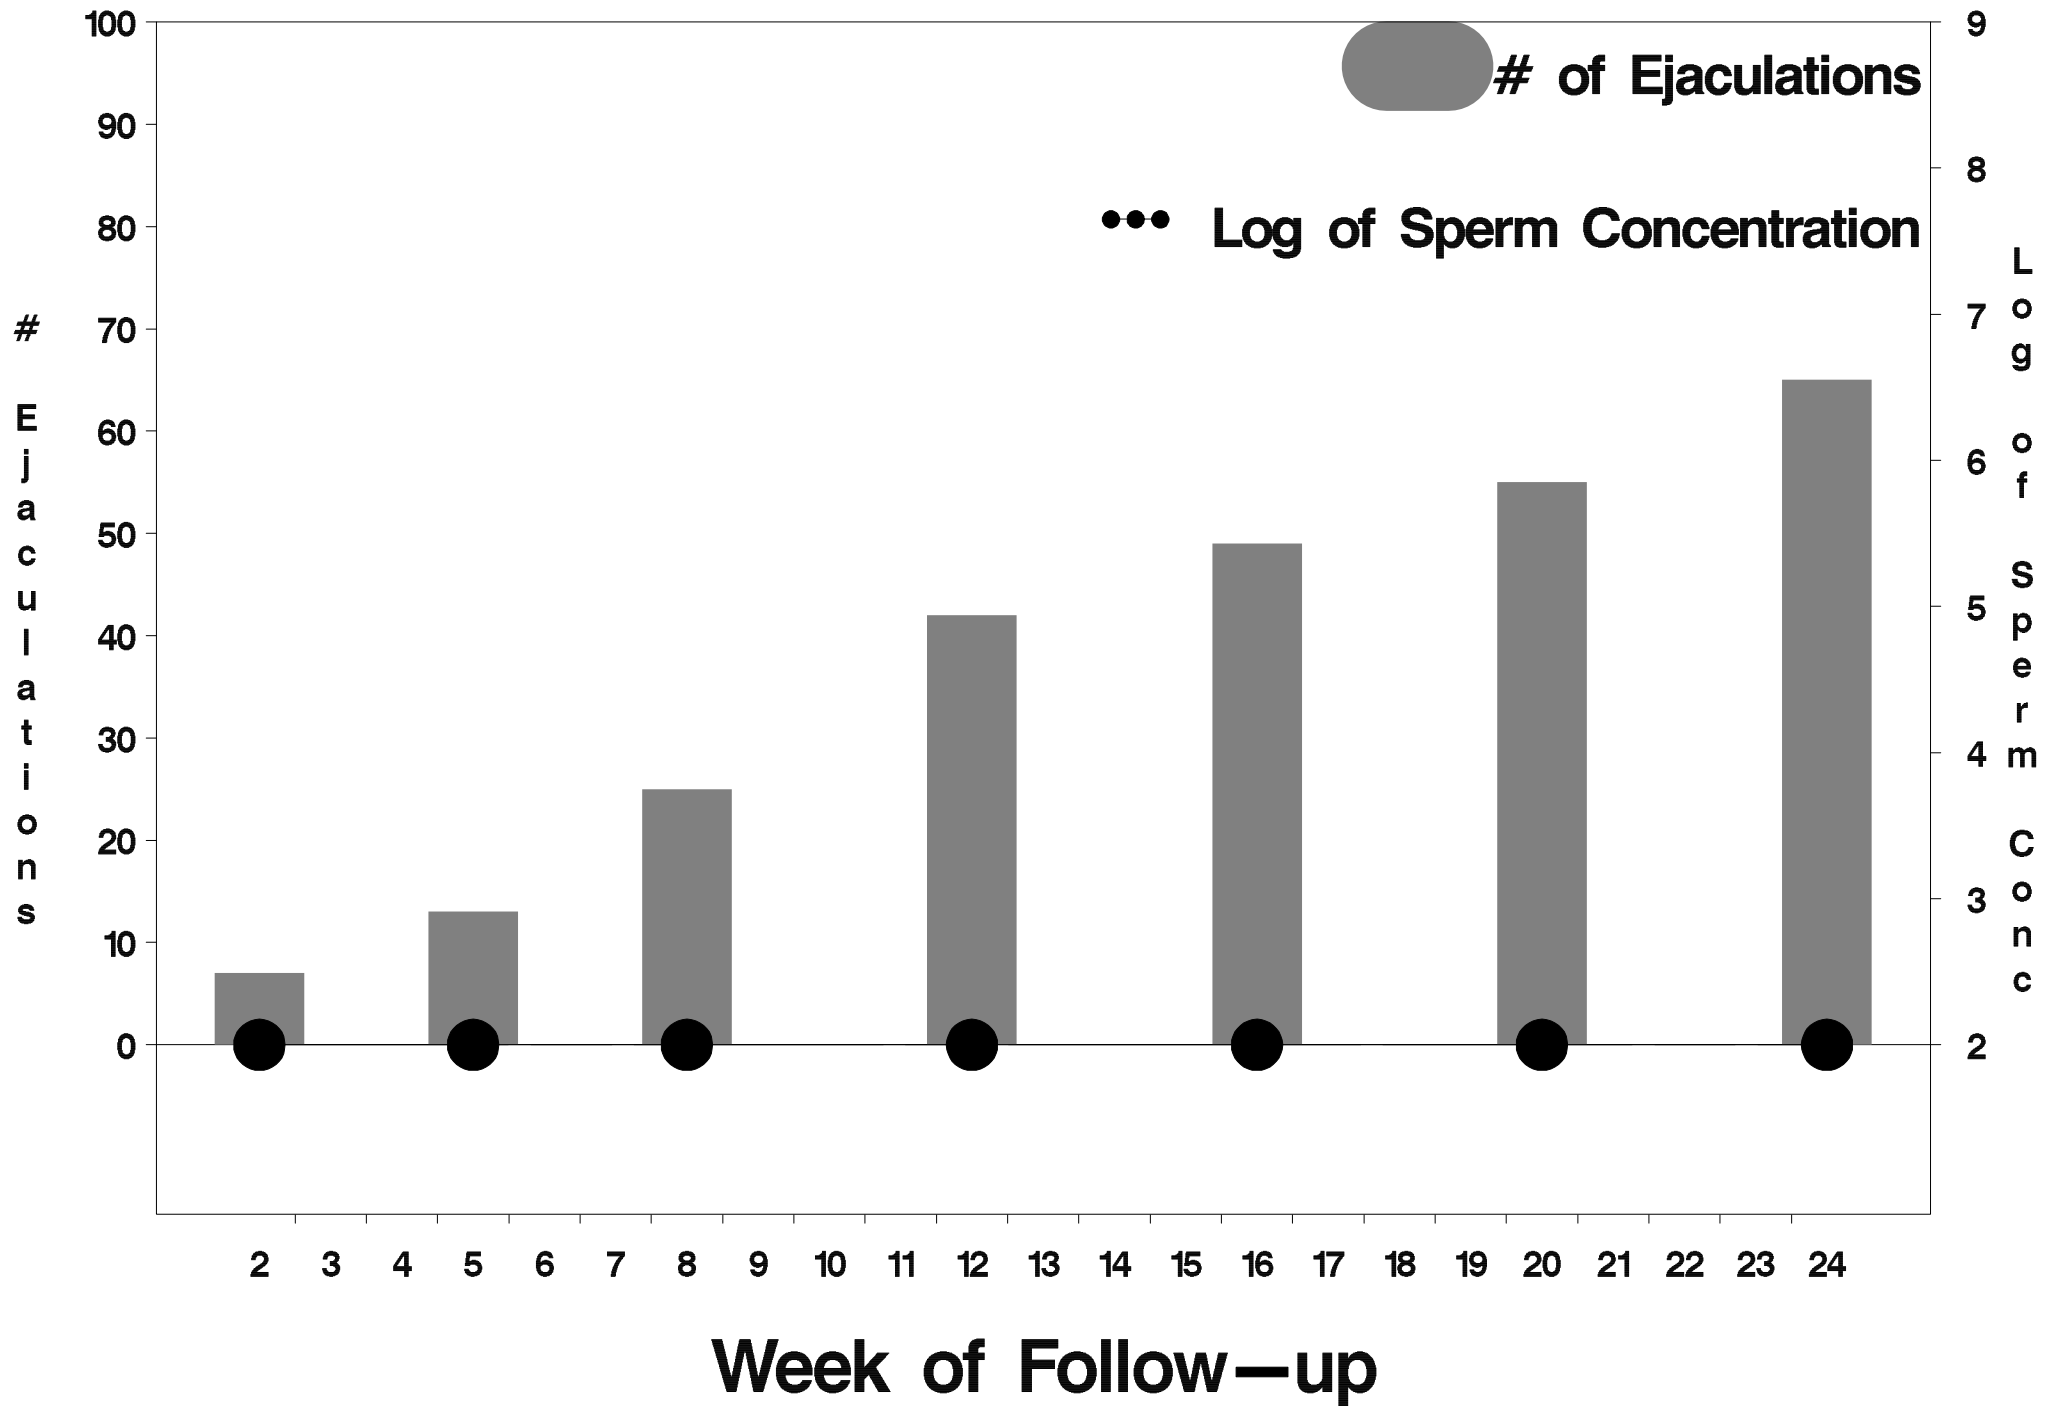



# Participant number= 578

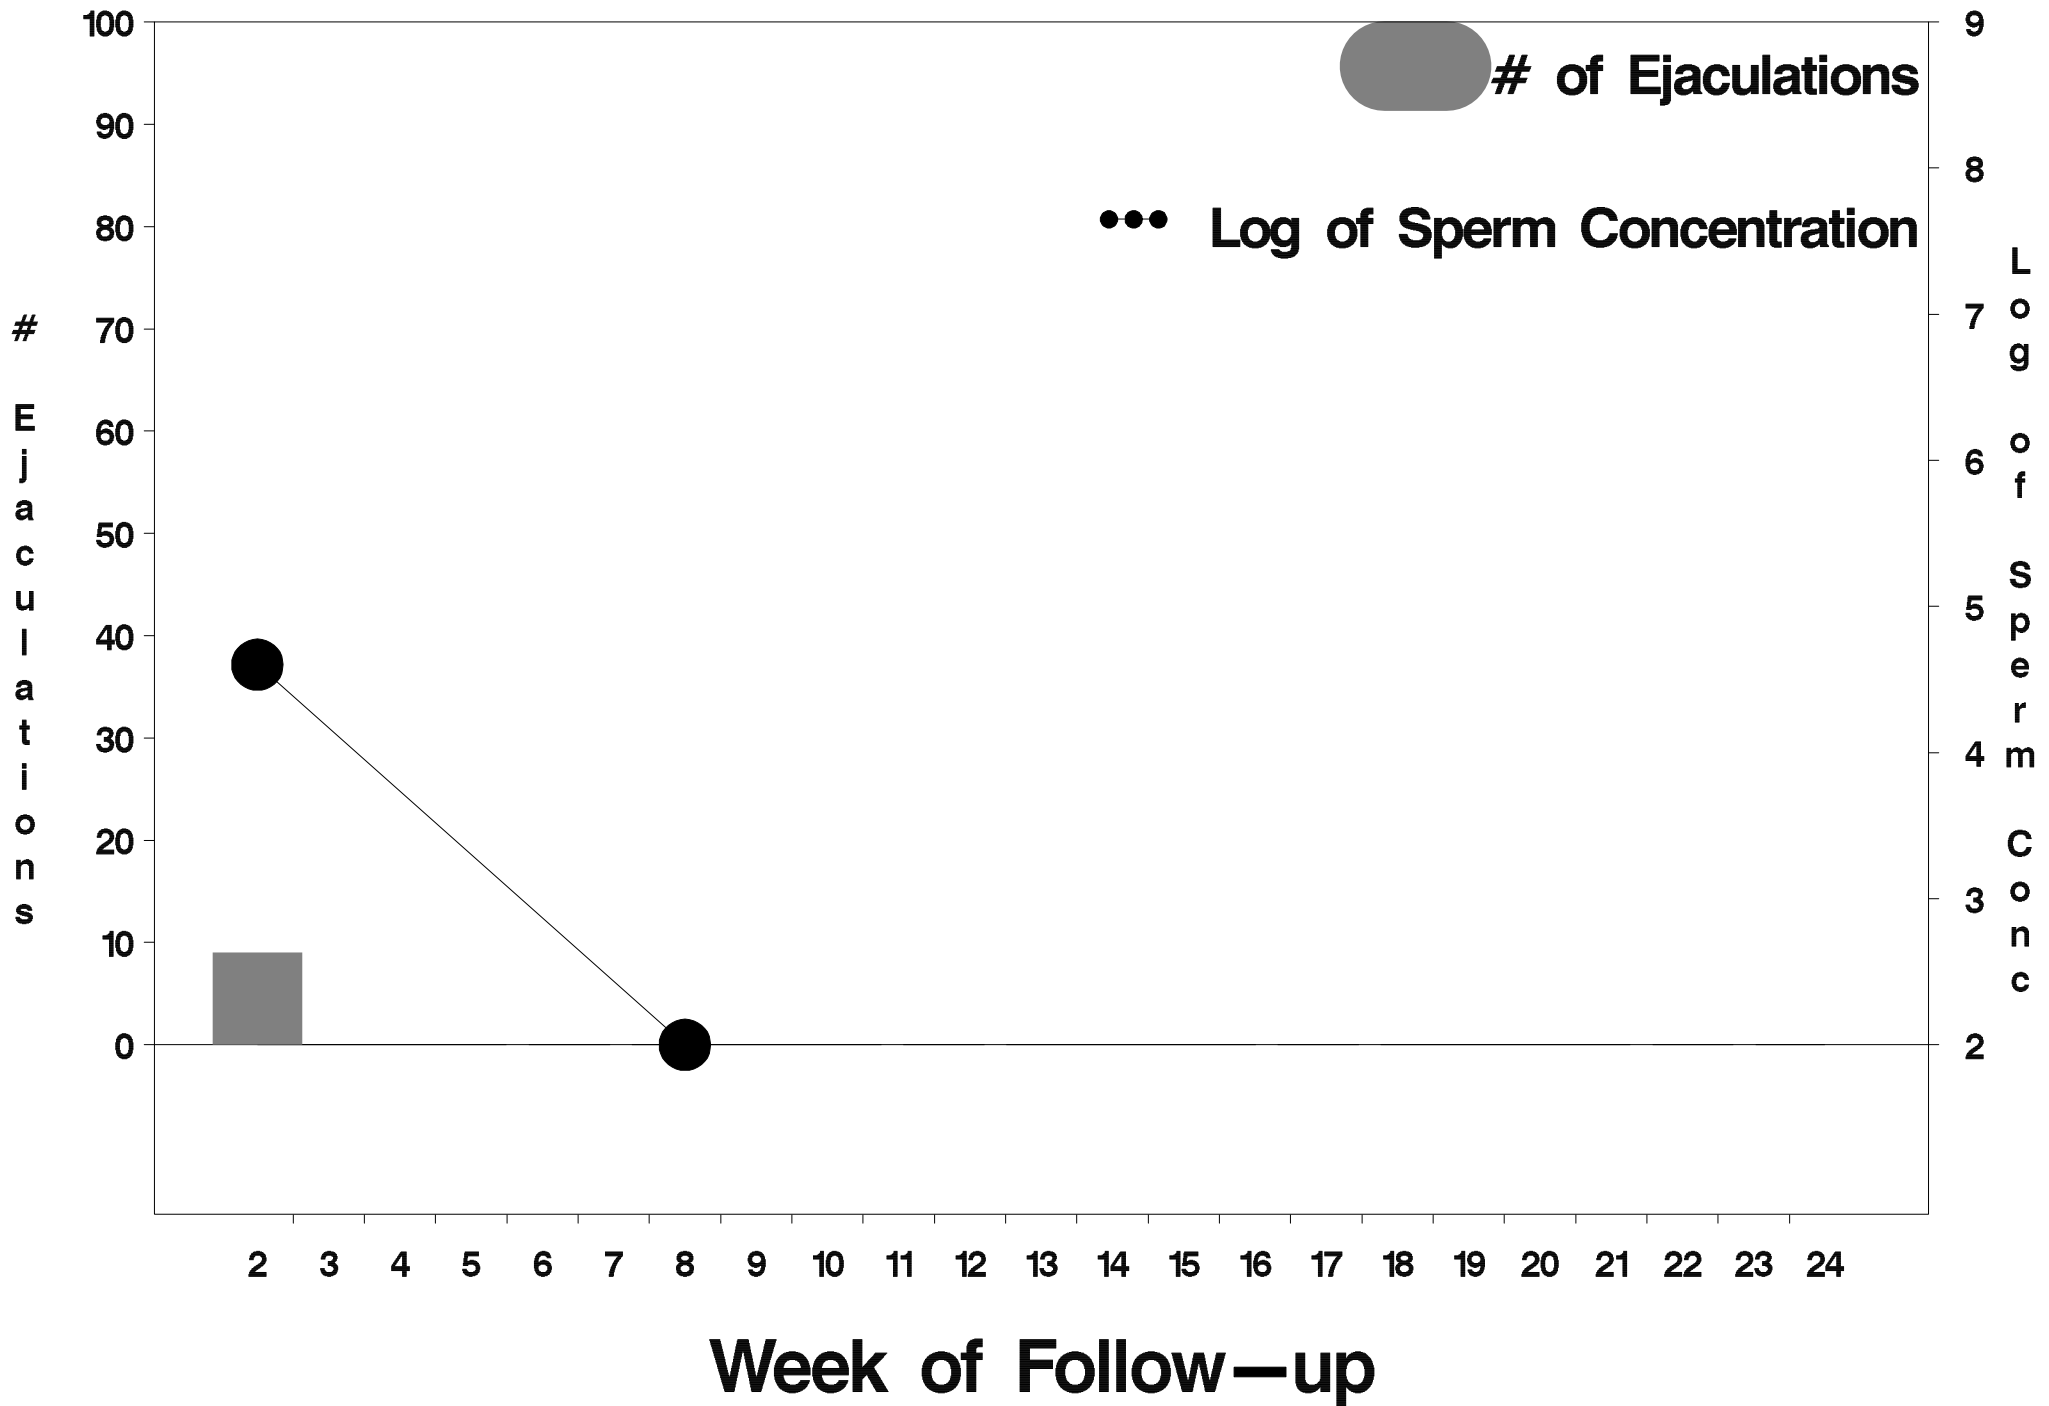

# Participant number= 579

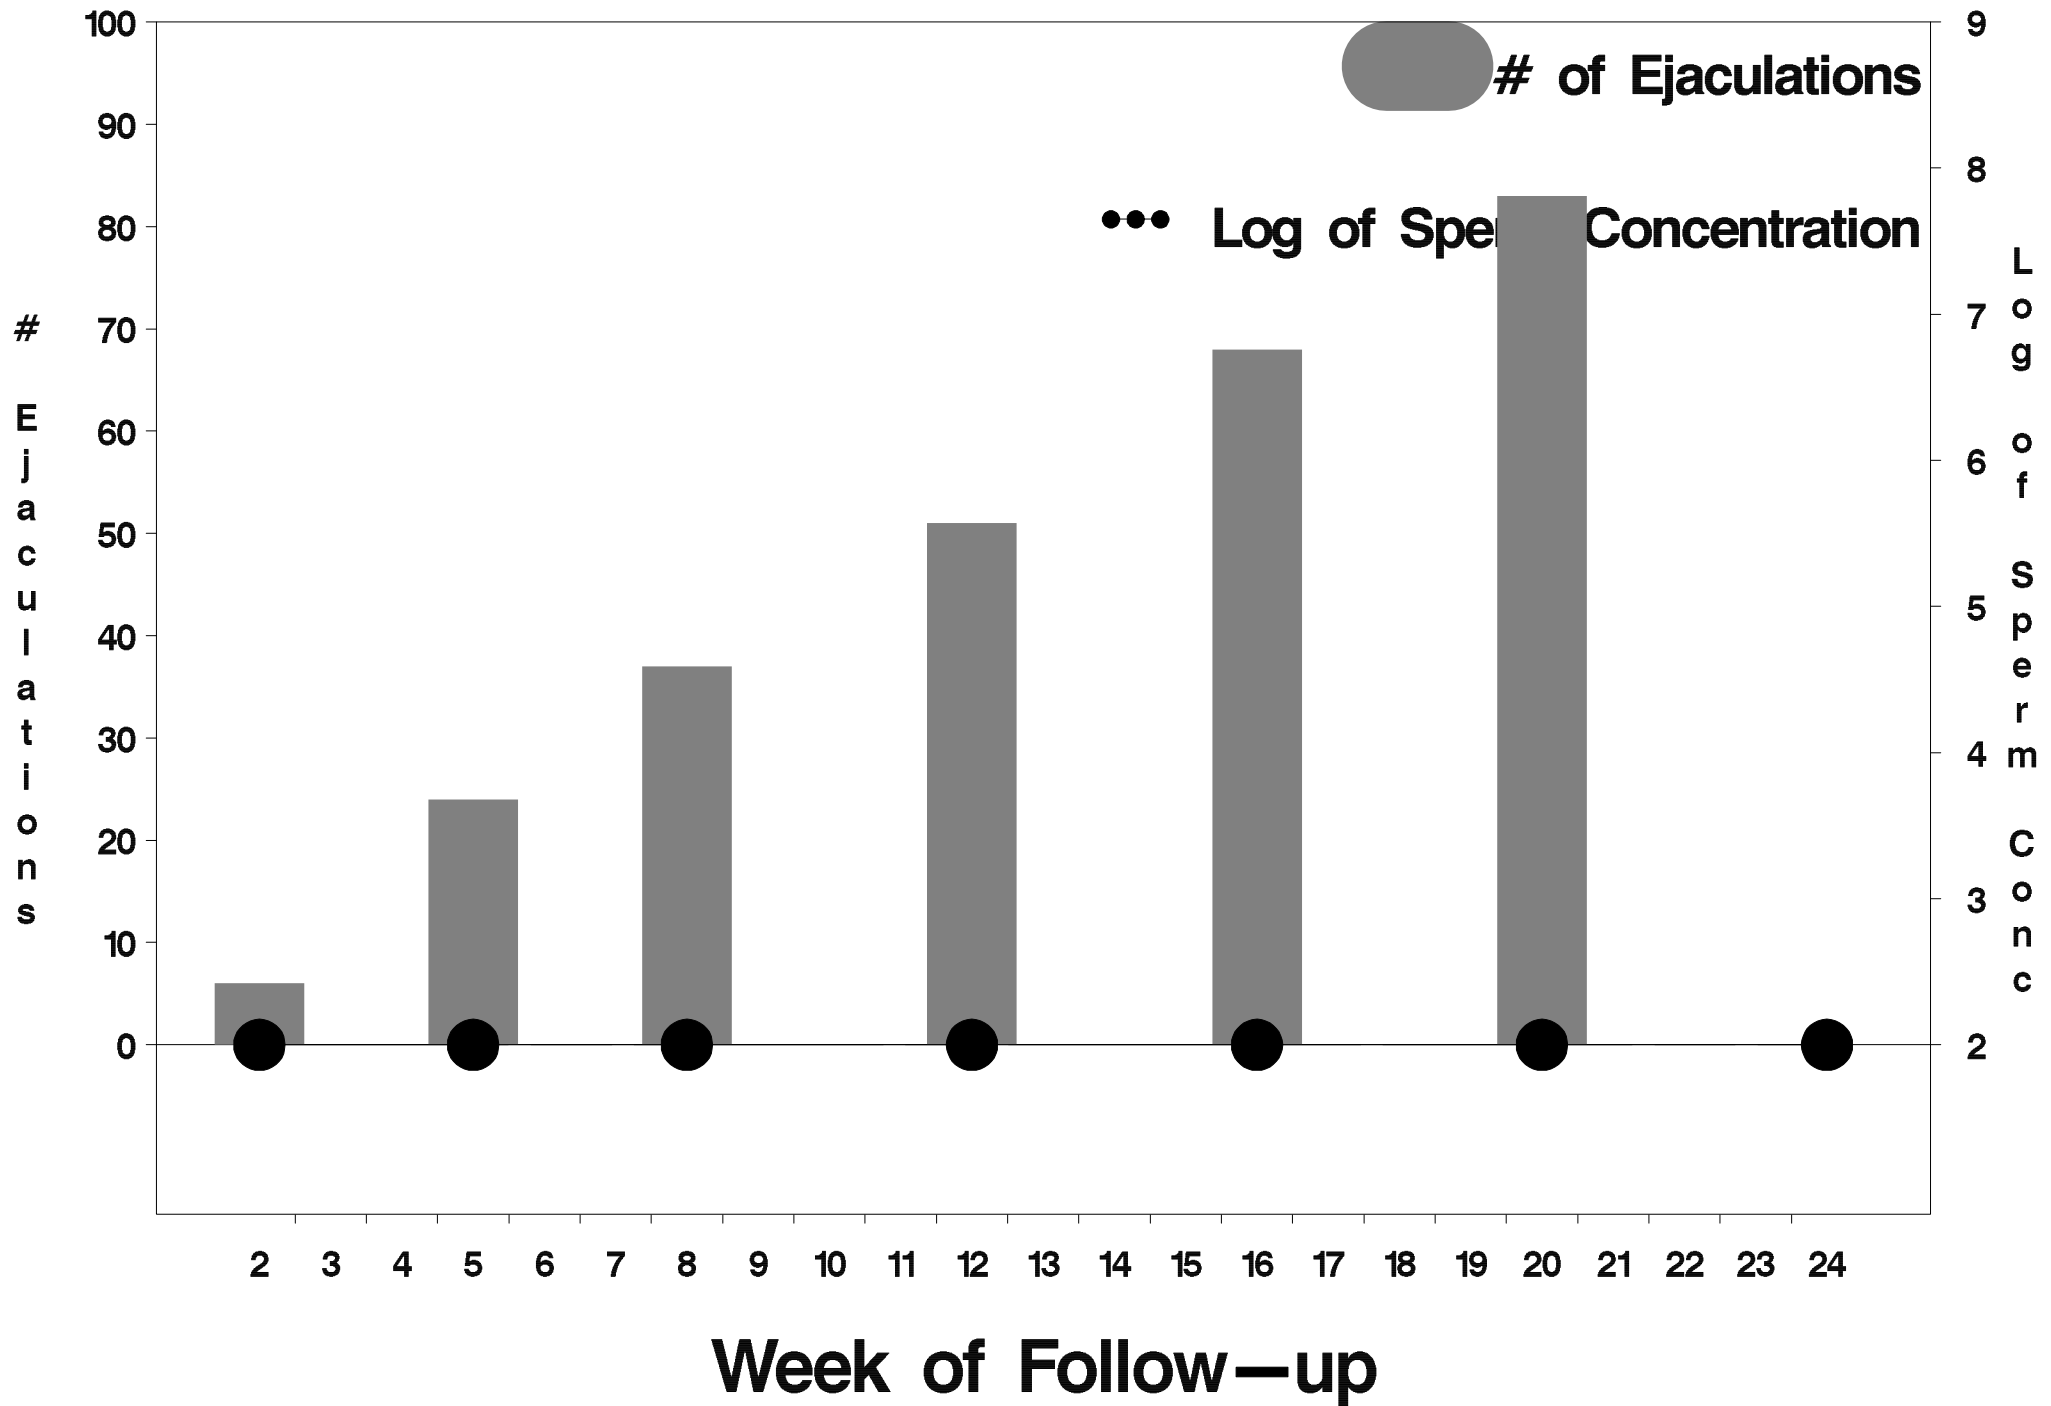



# Participant number= 580

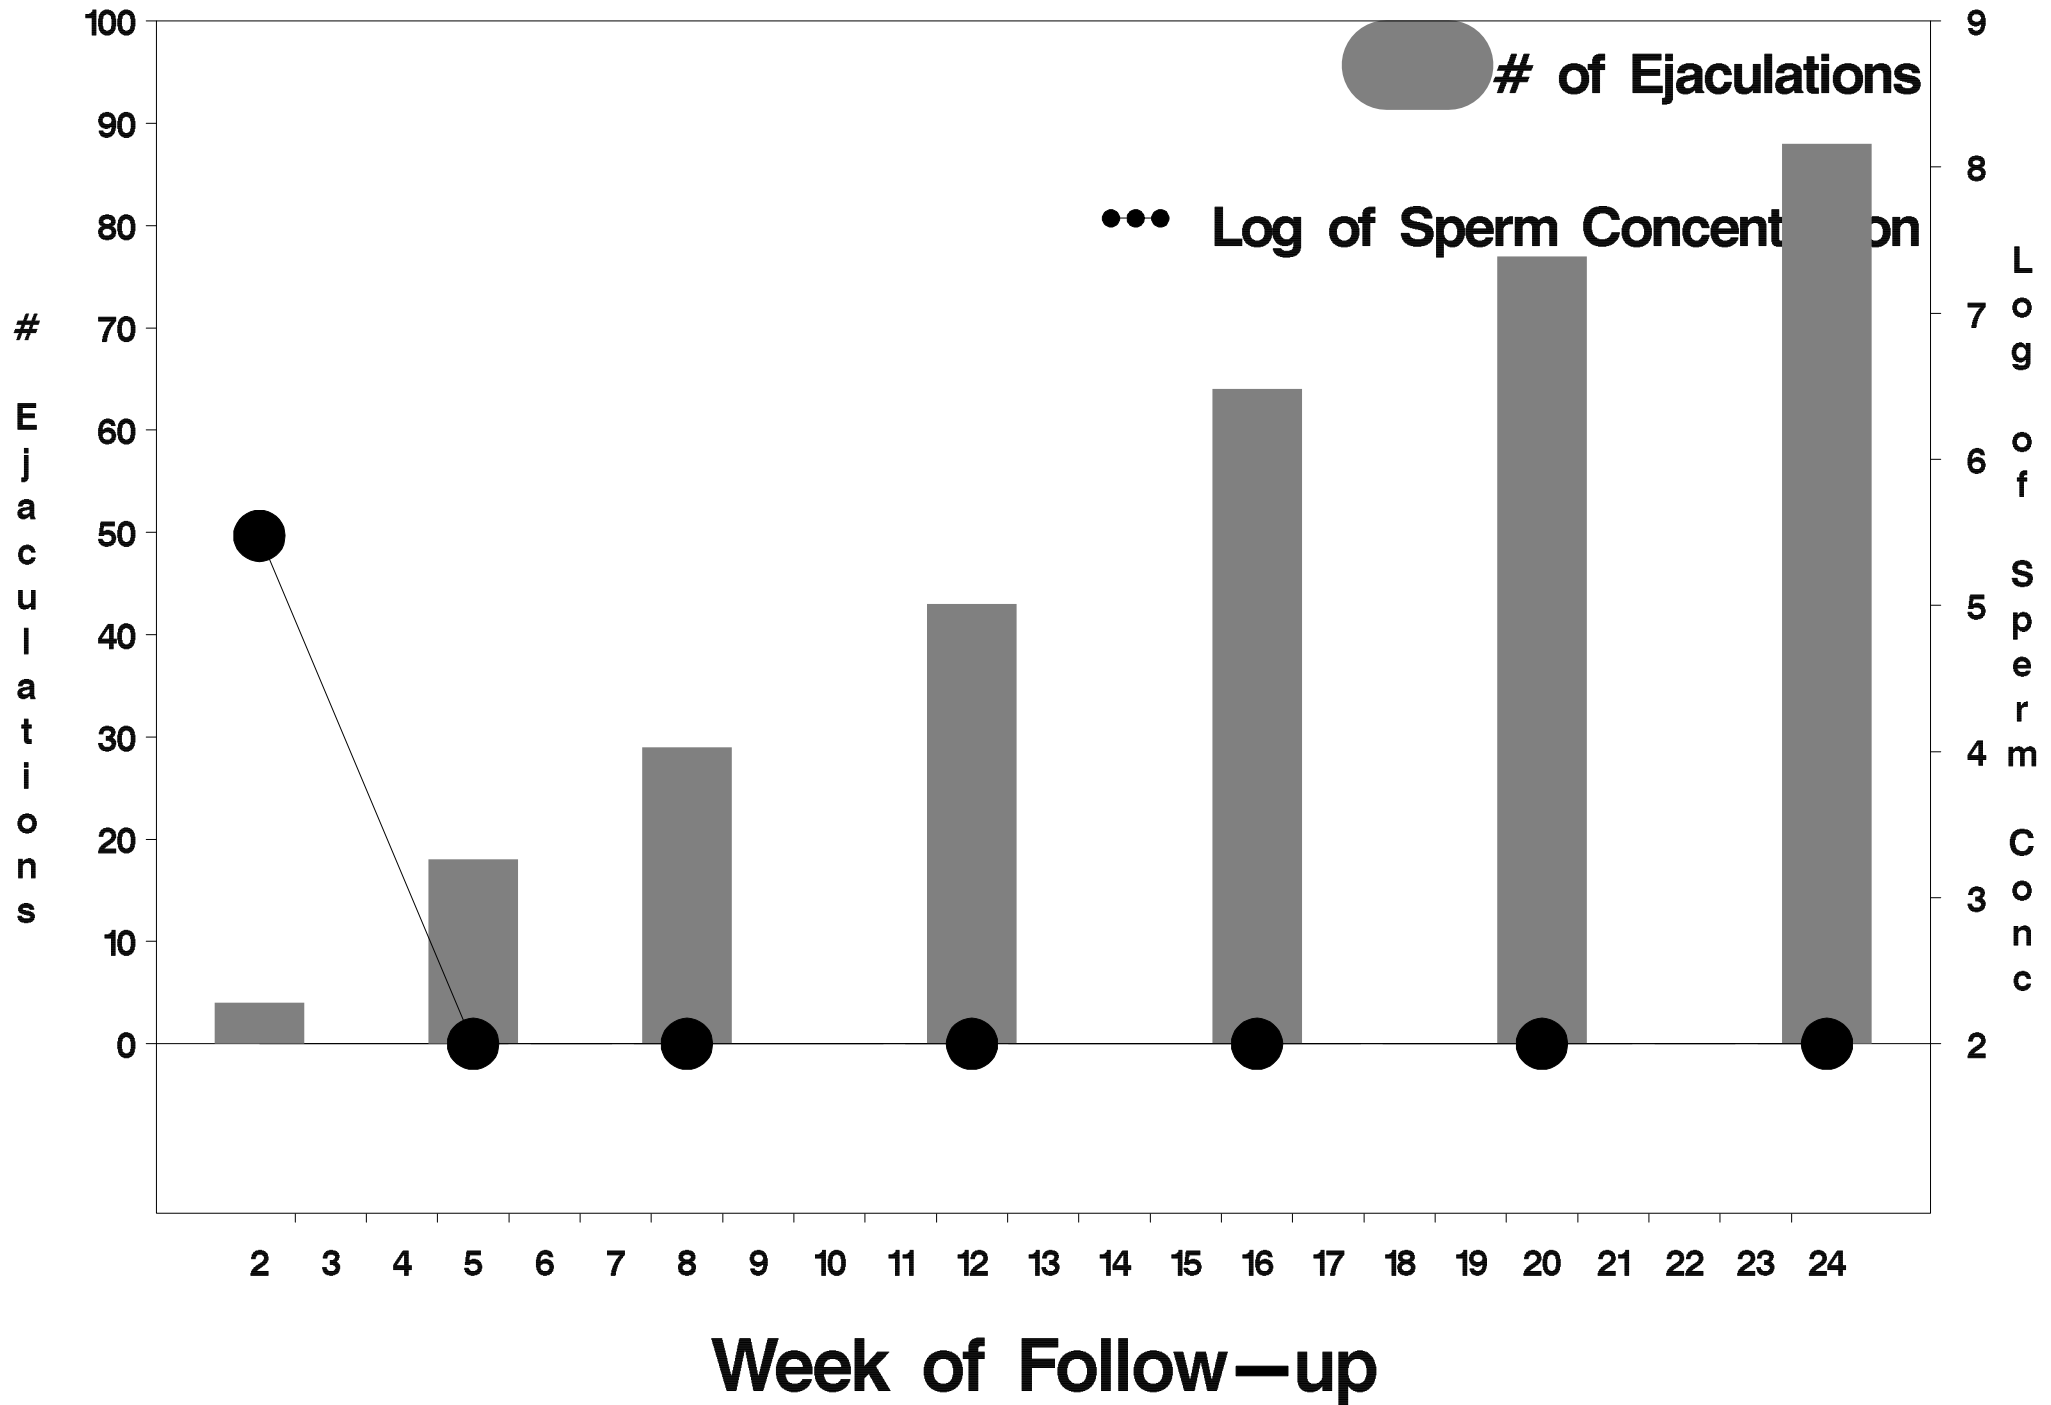

# Participant number= 581

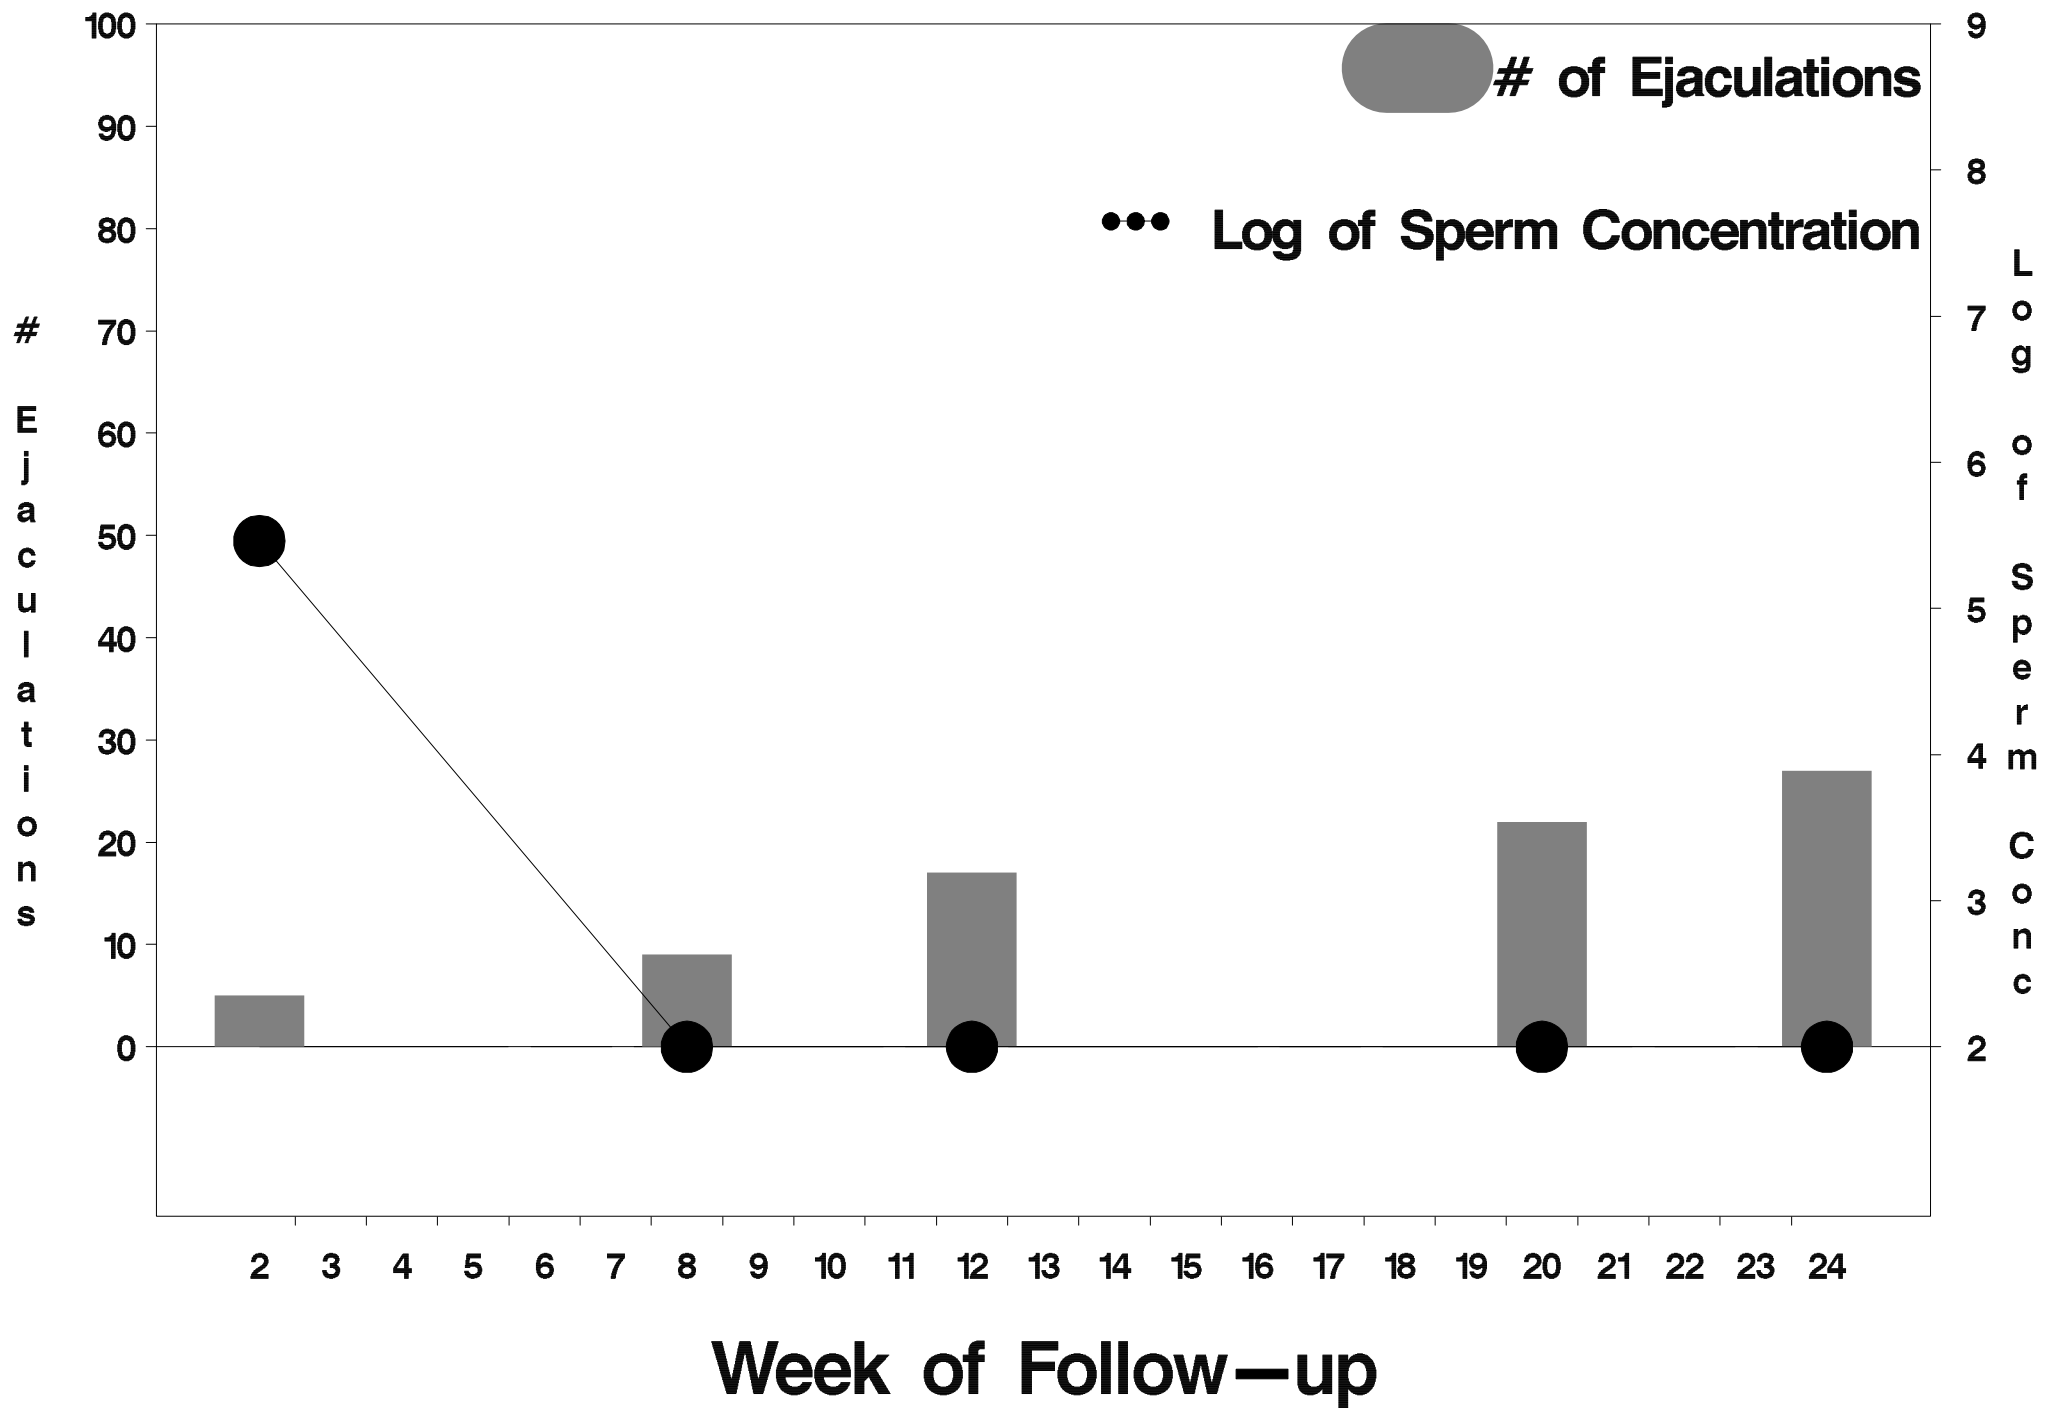

# Participant number= 582

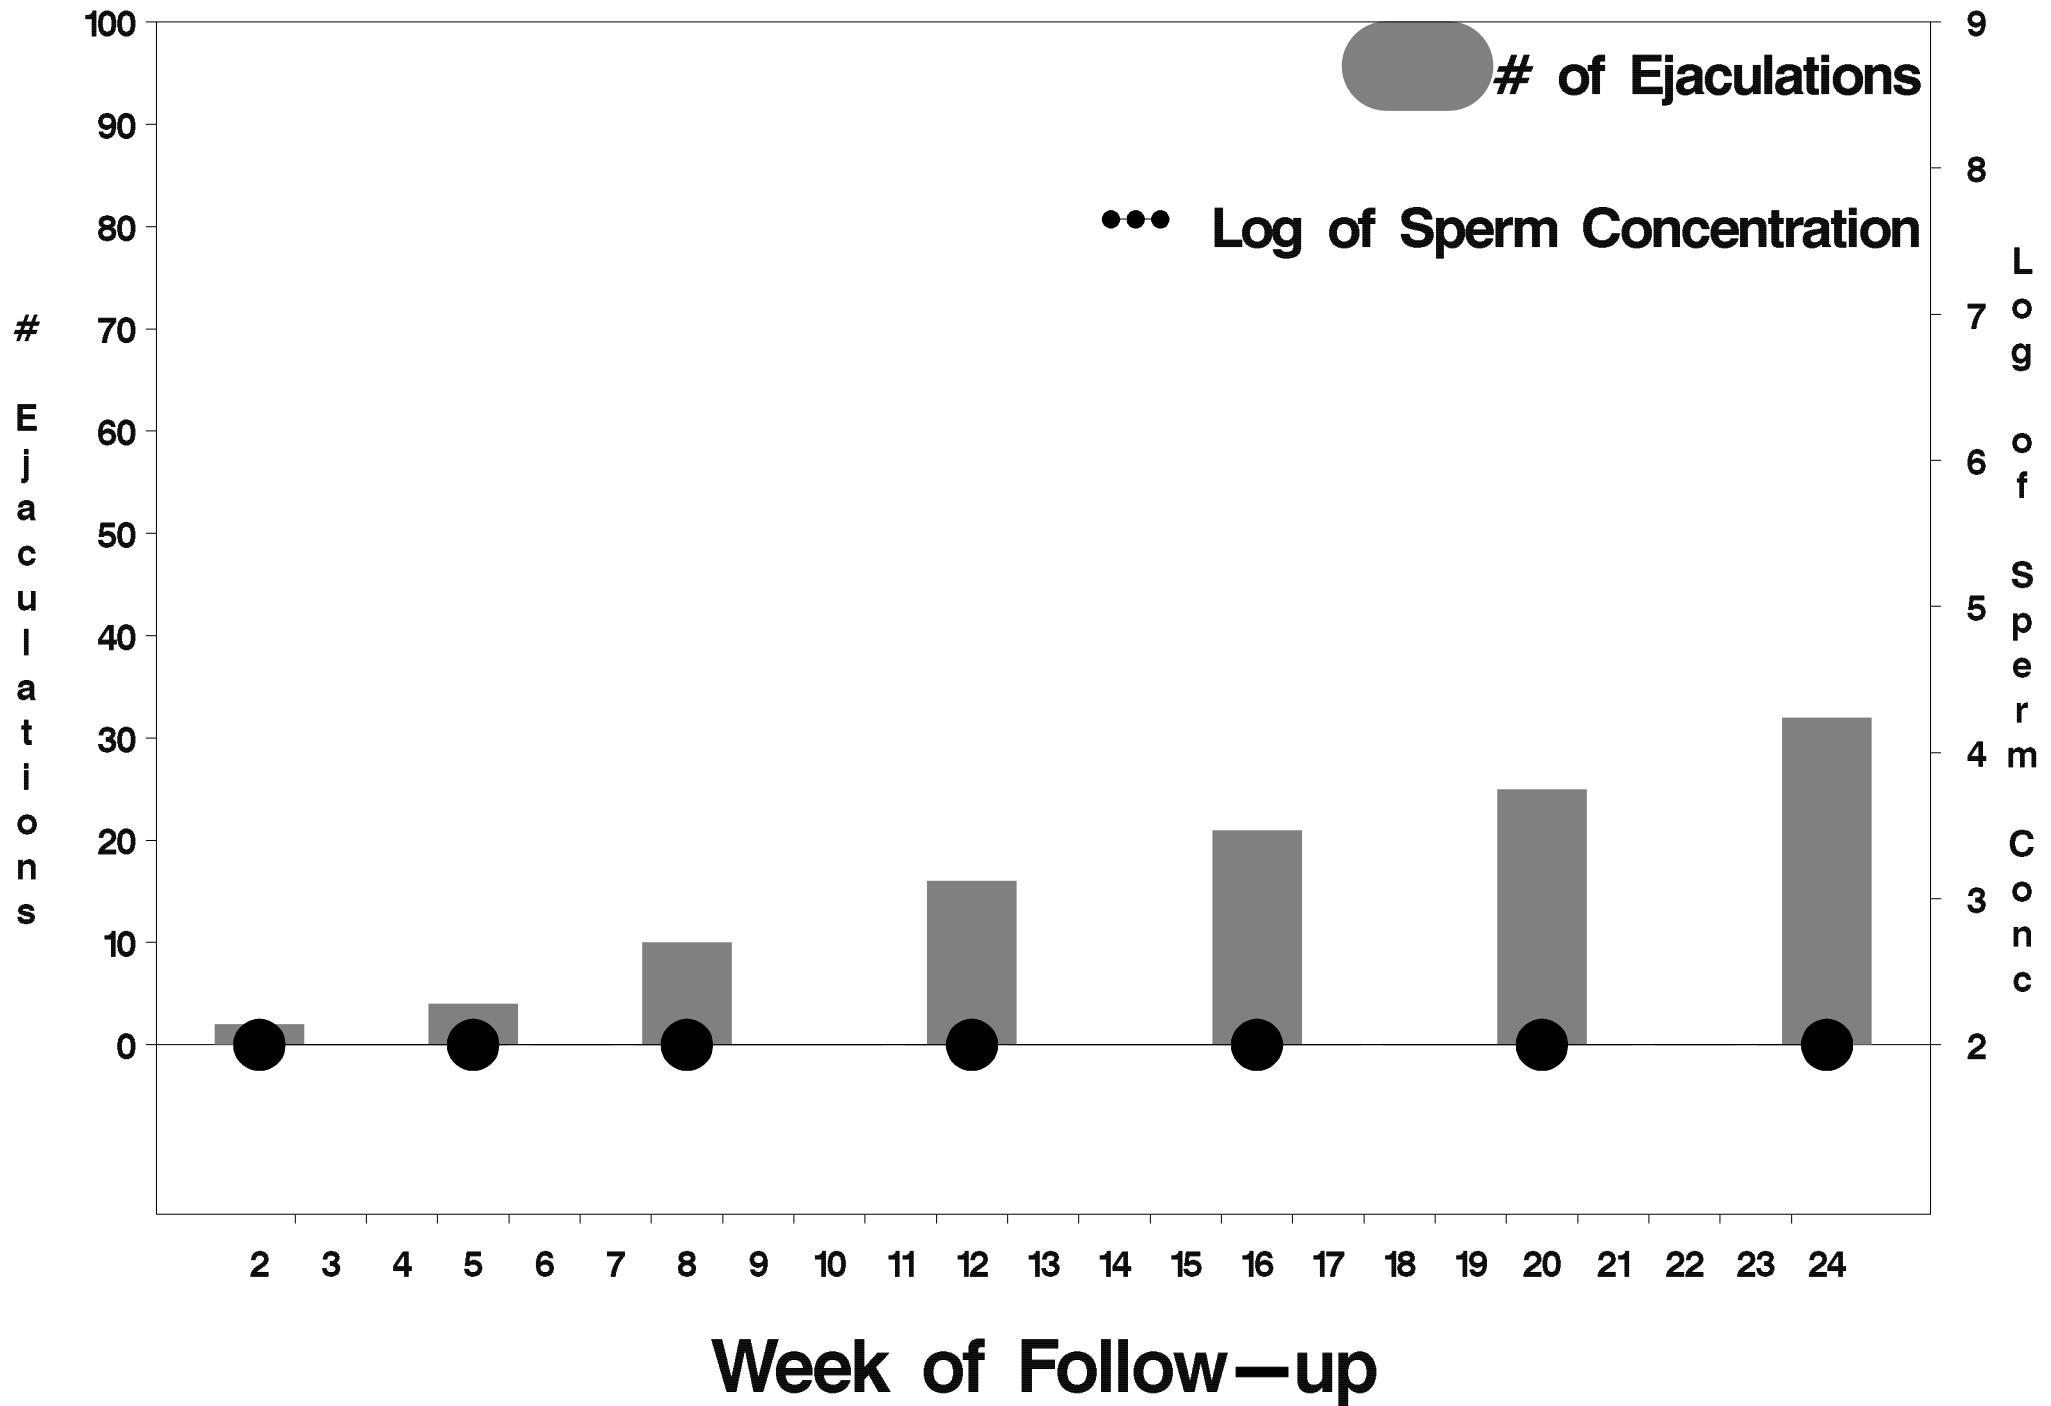

# Participant number= 583

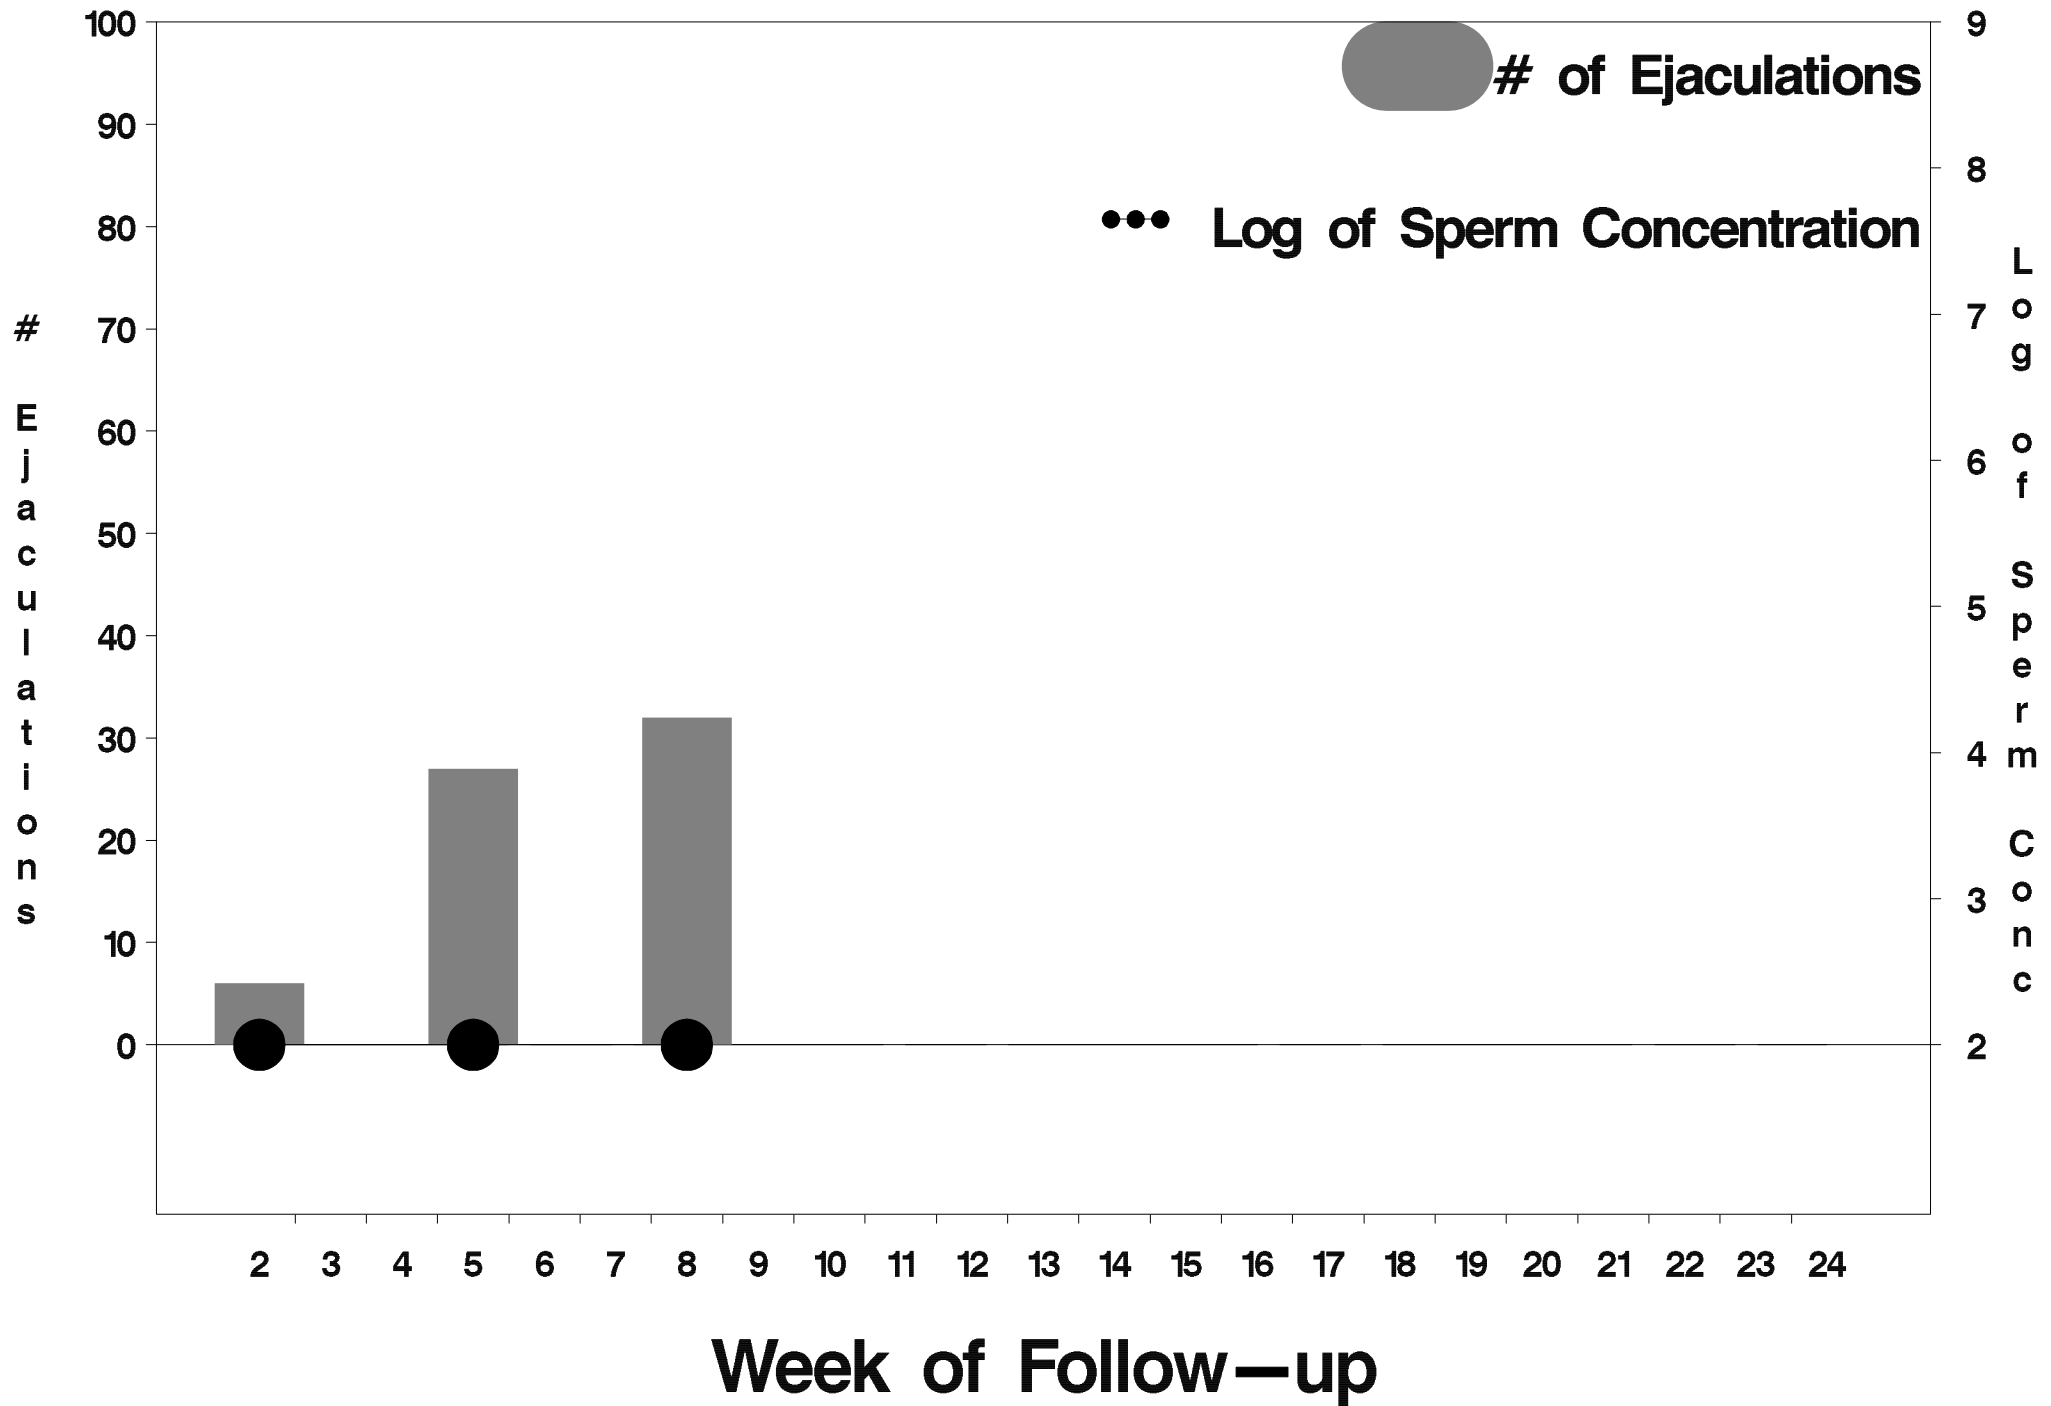

# Participant number= 584

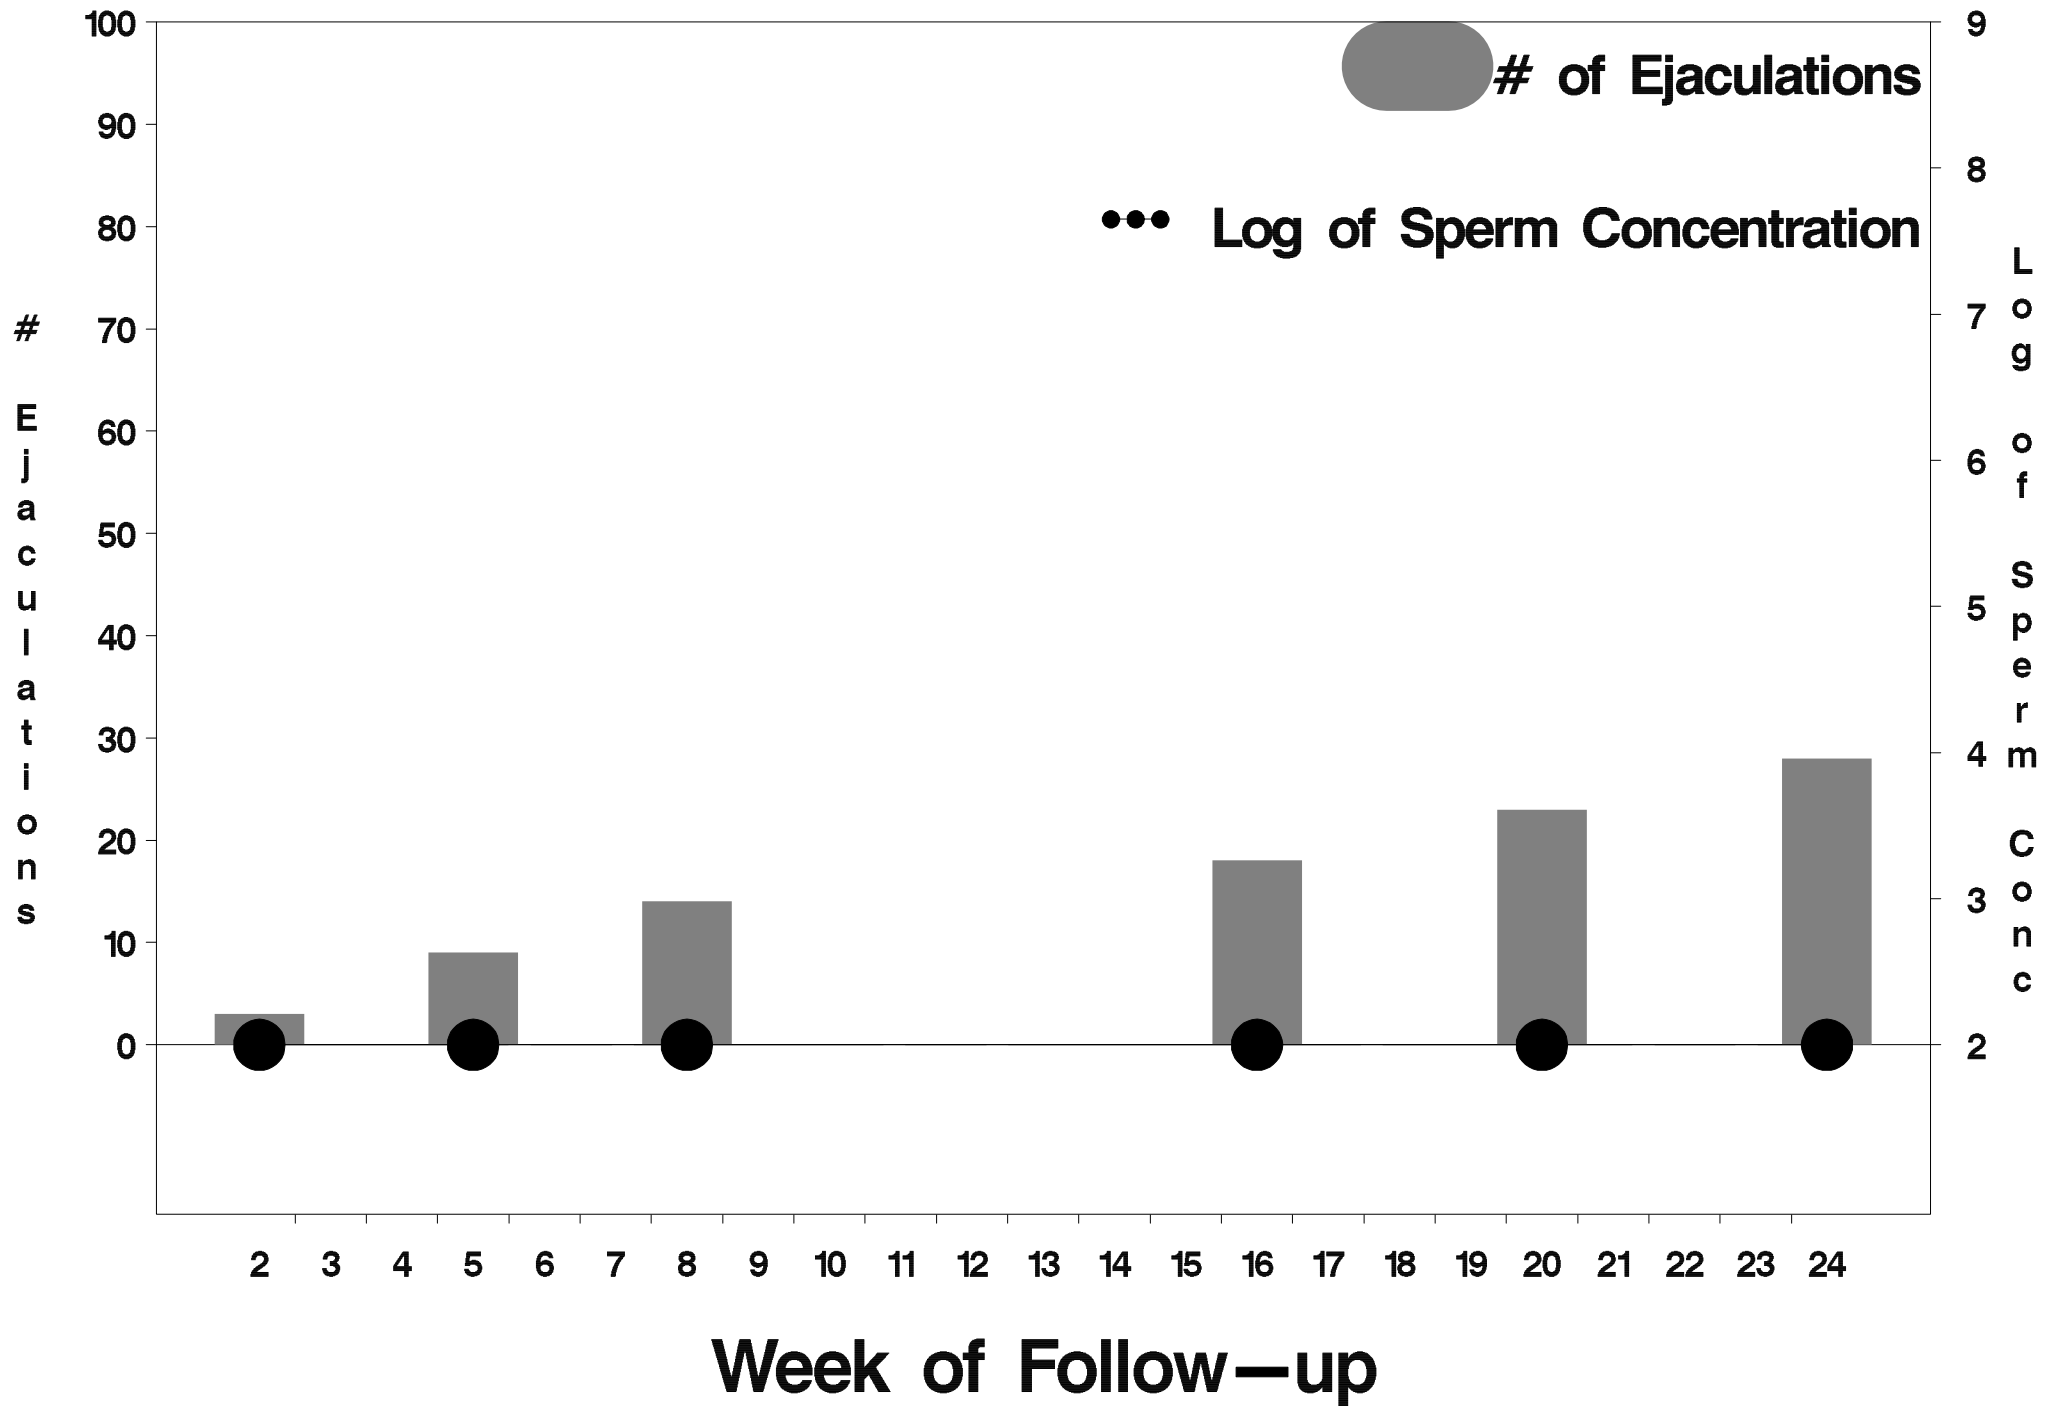

# Participant number= 585

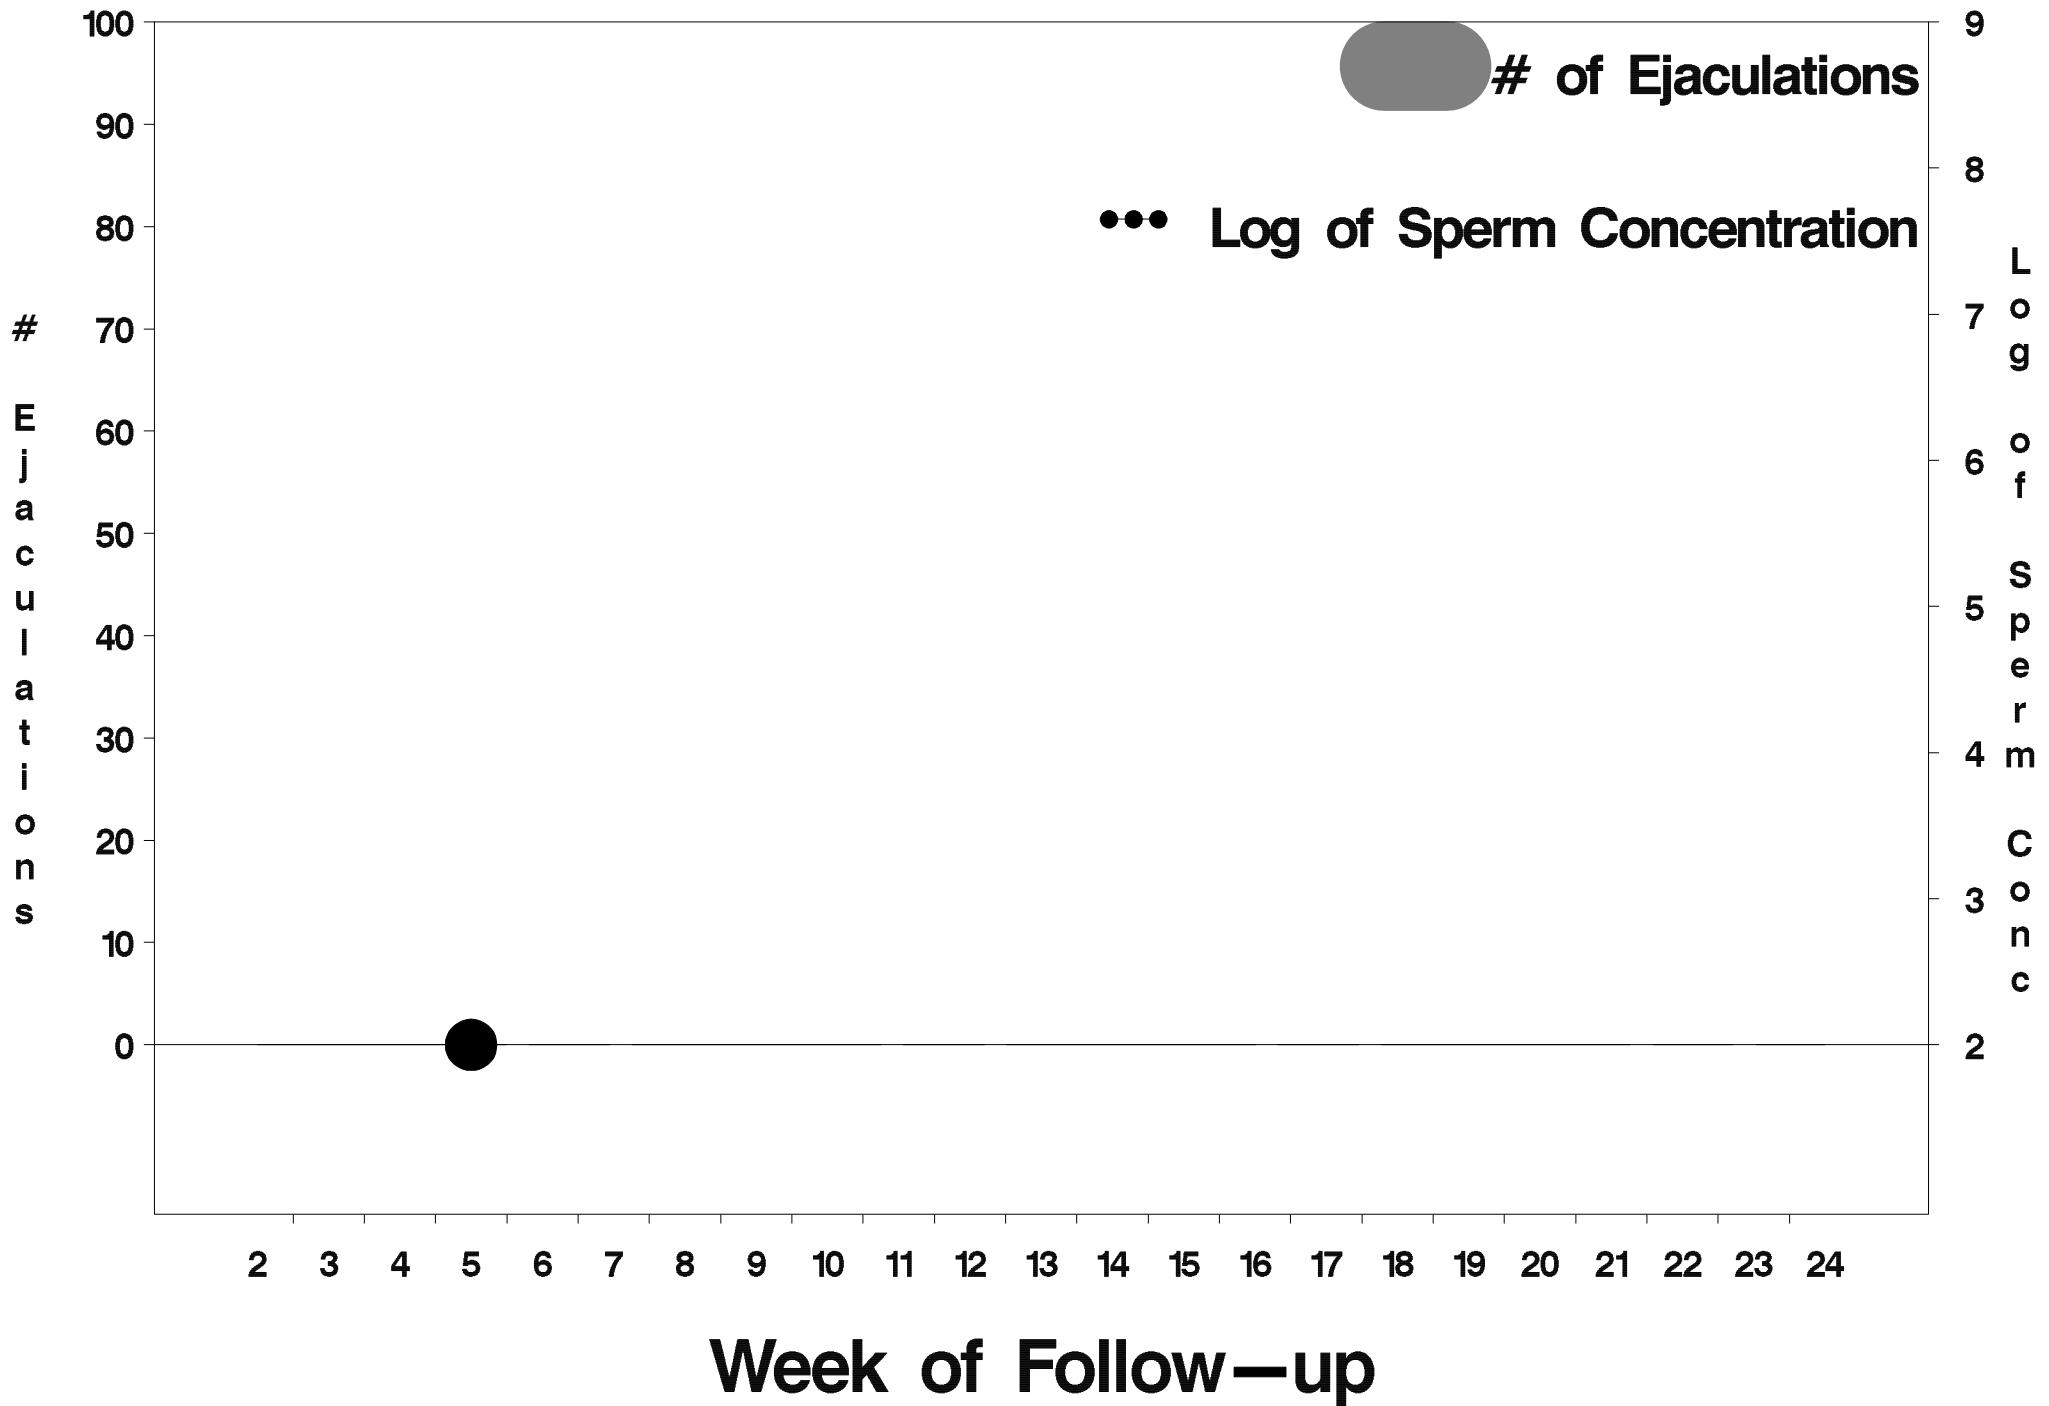

# Participant number= 586

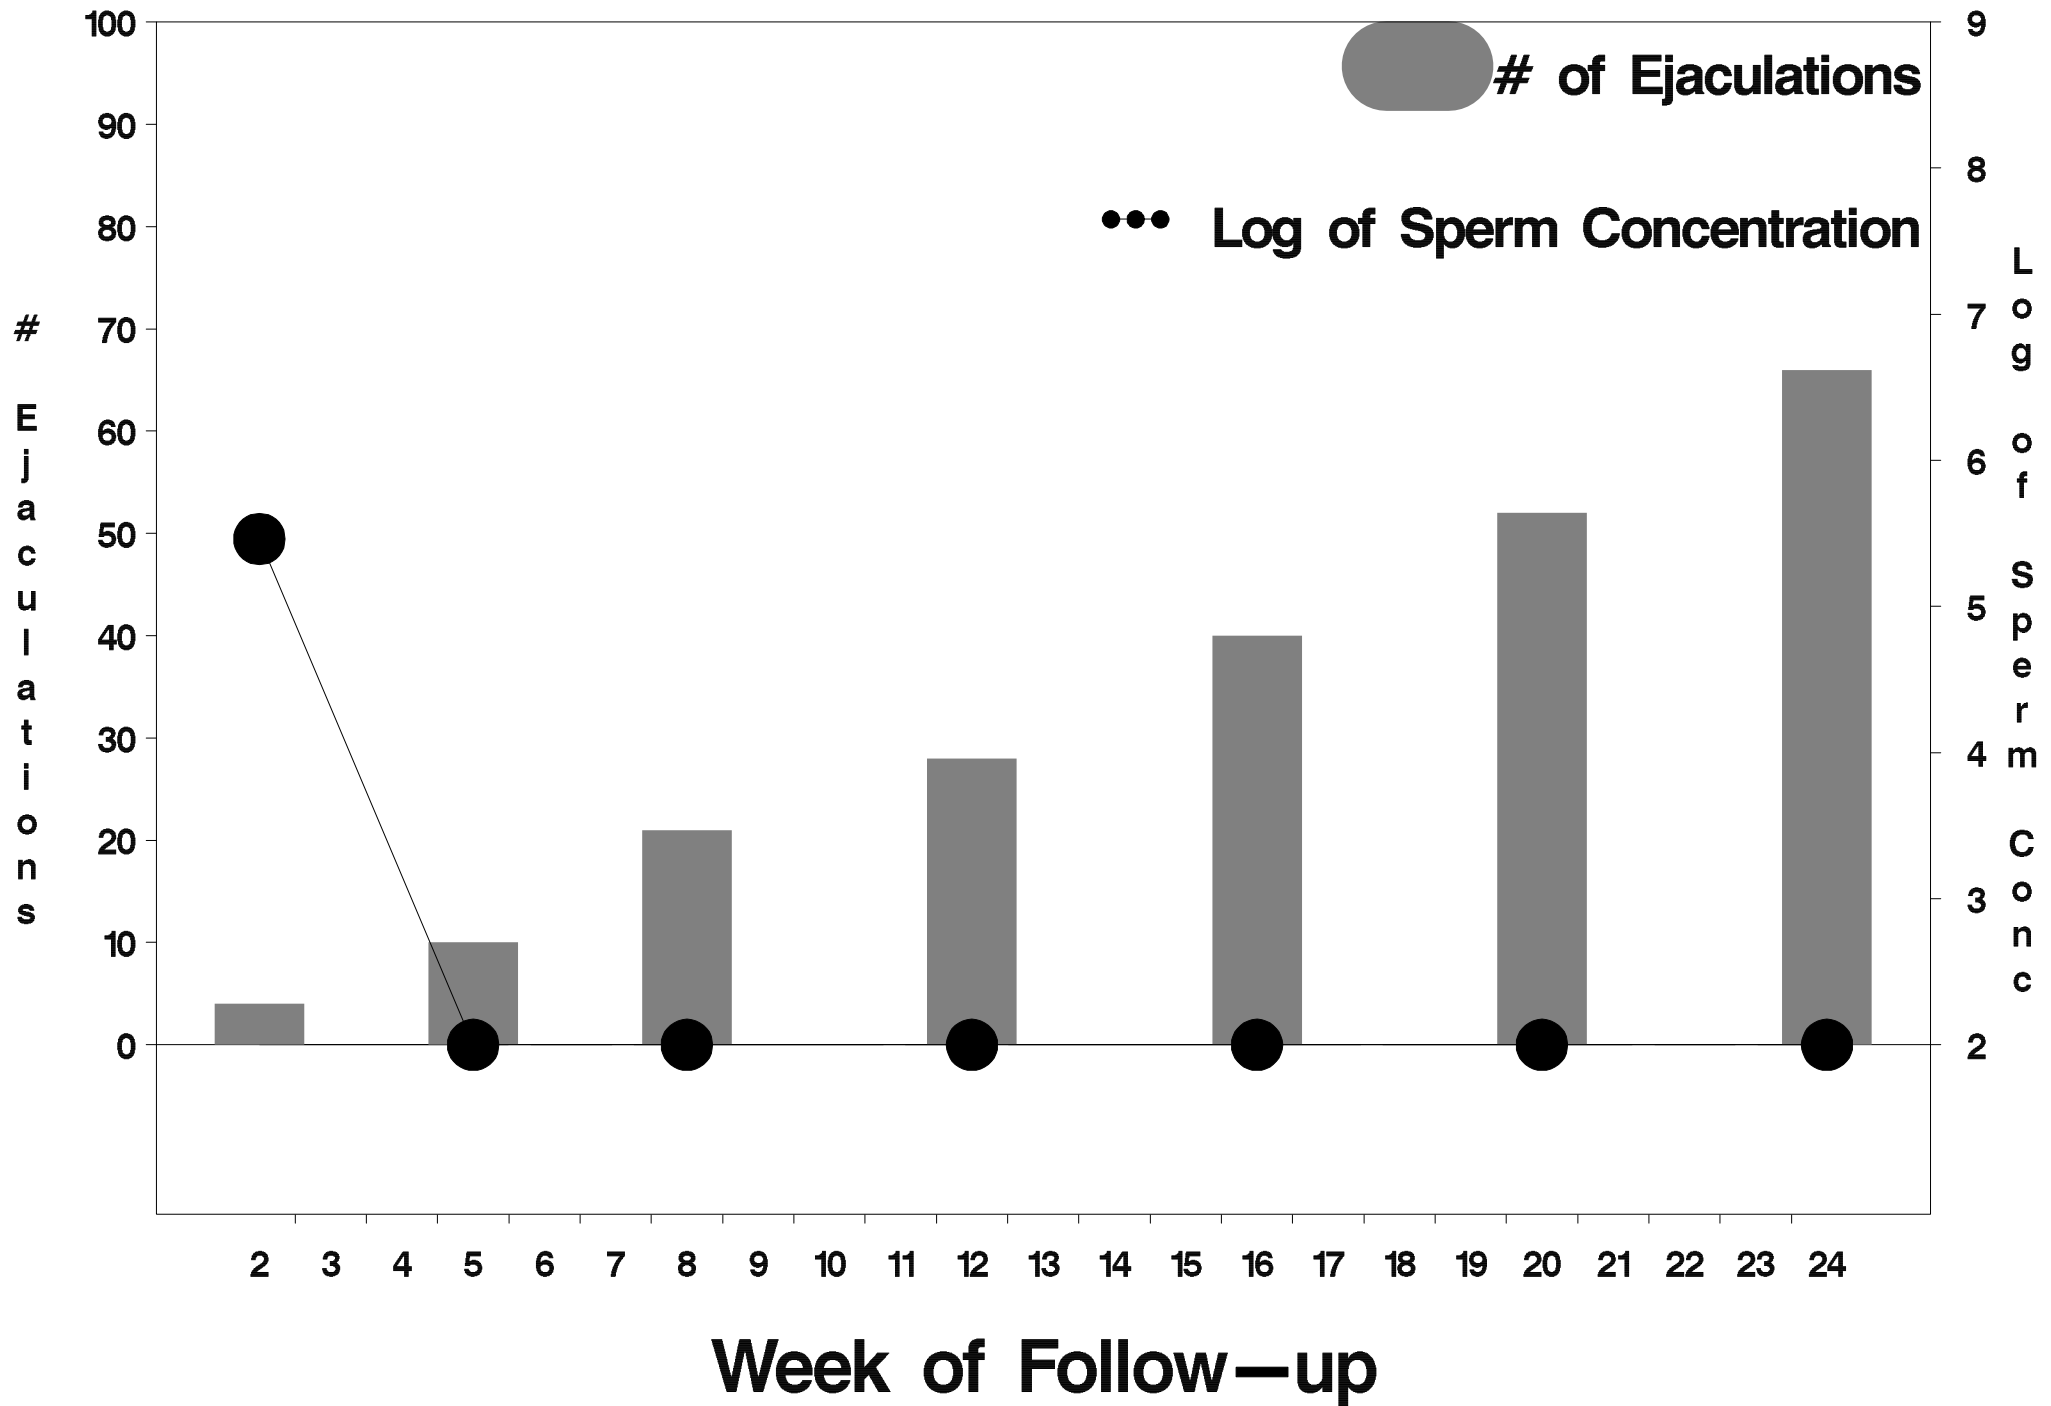

# Participant number= 587

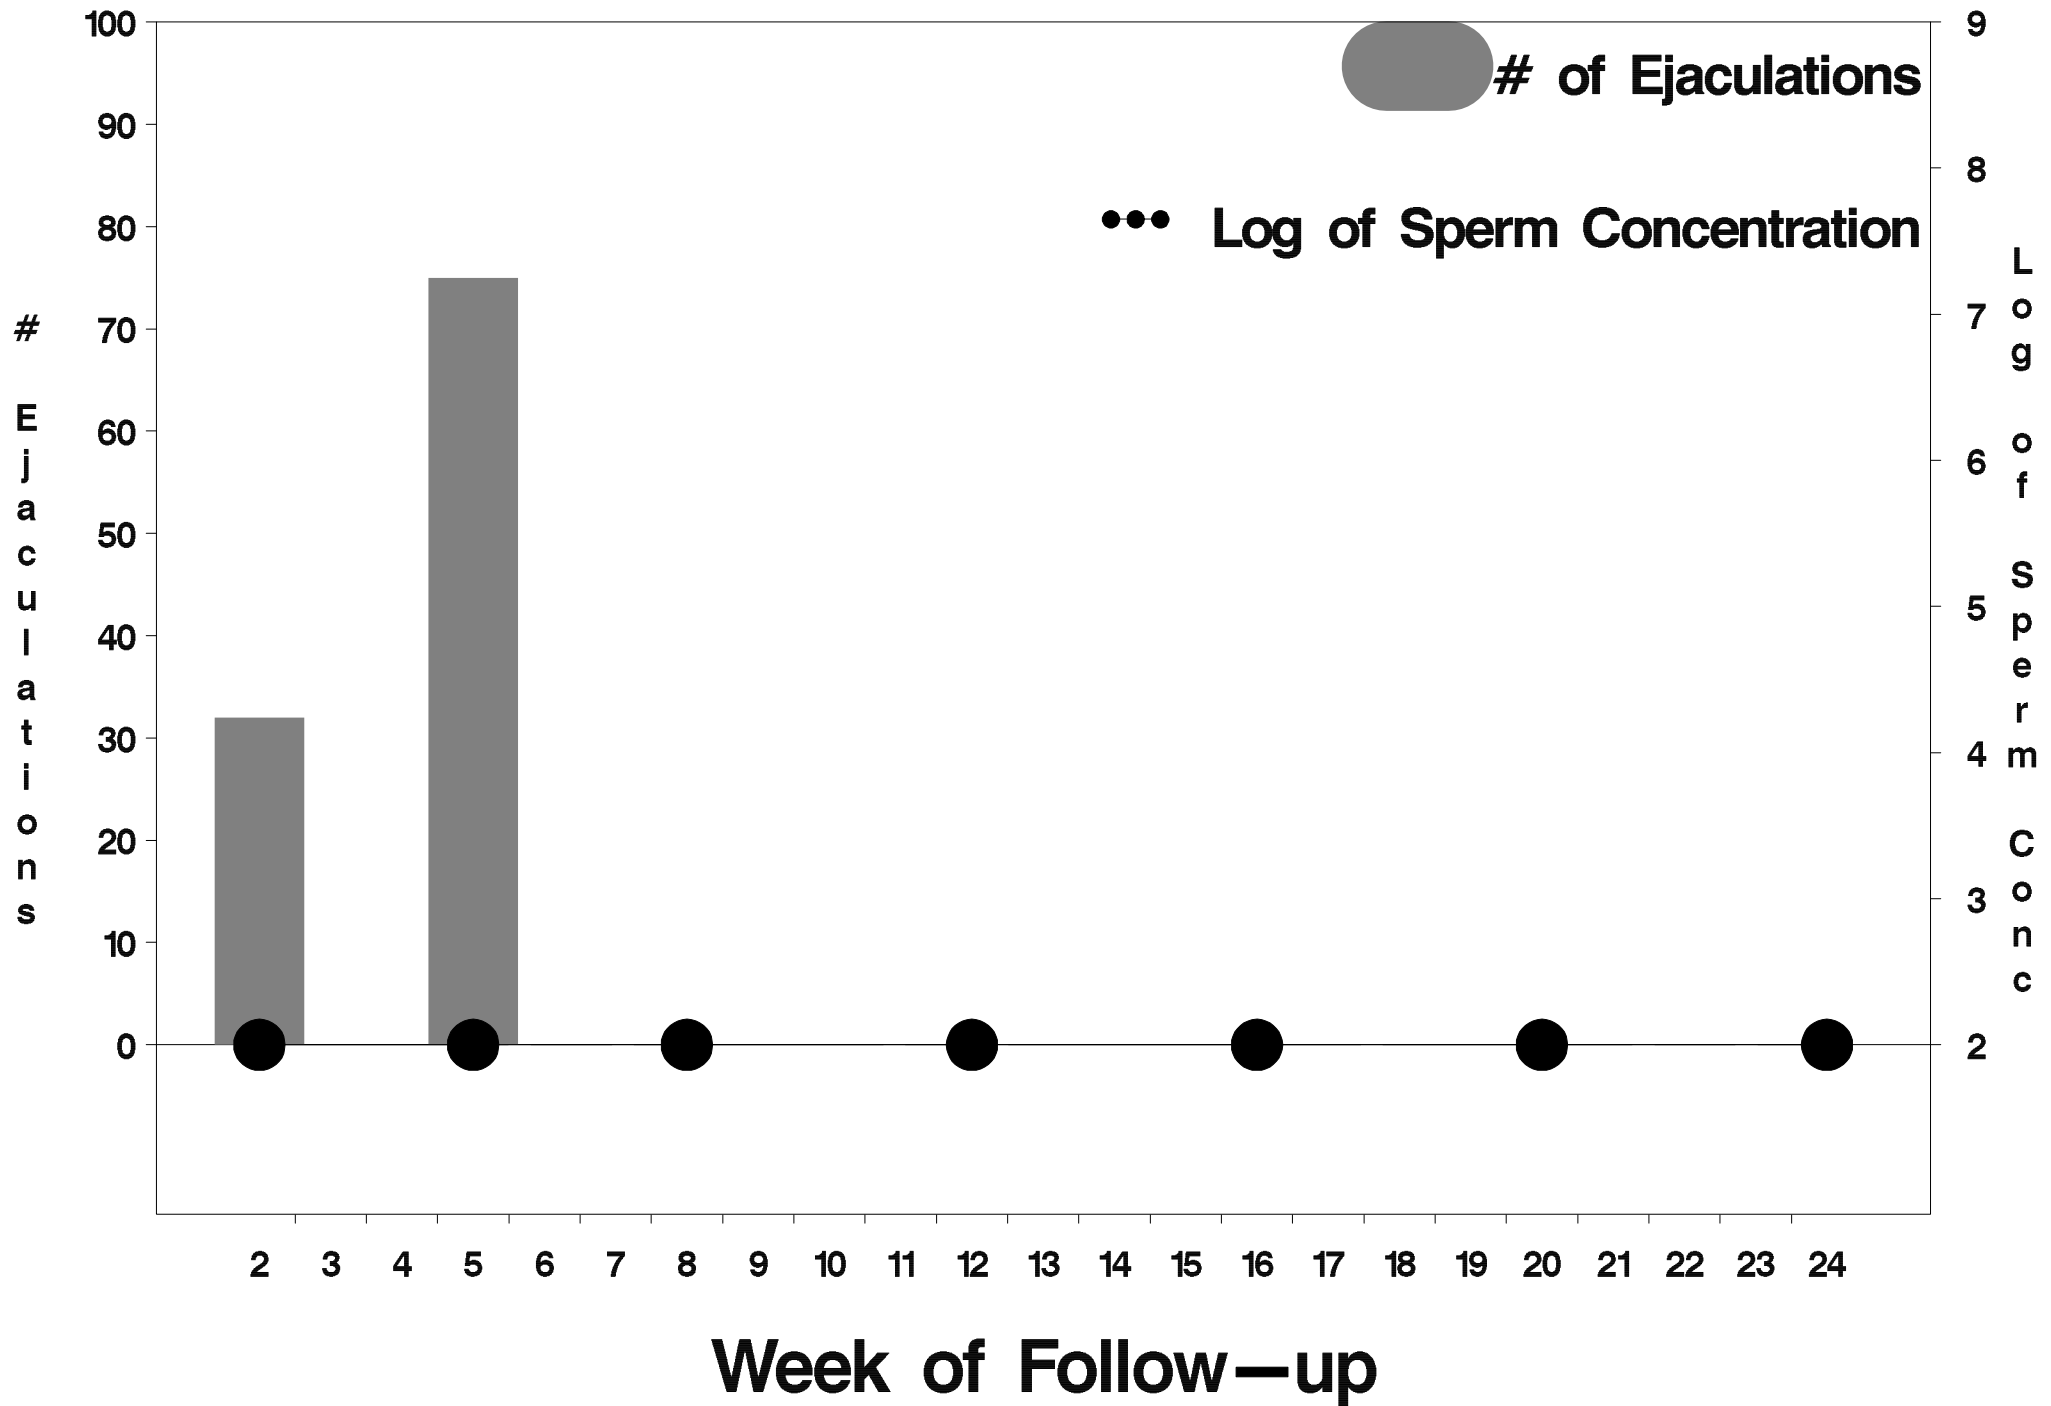



# Participant number= 588

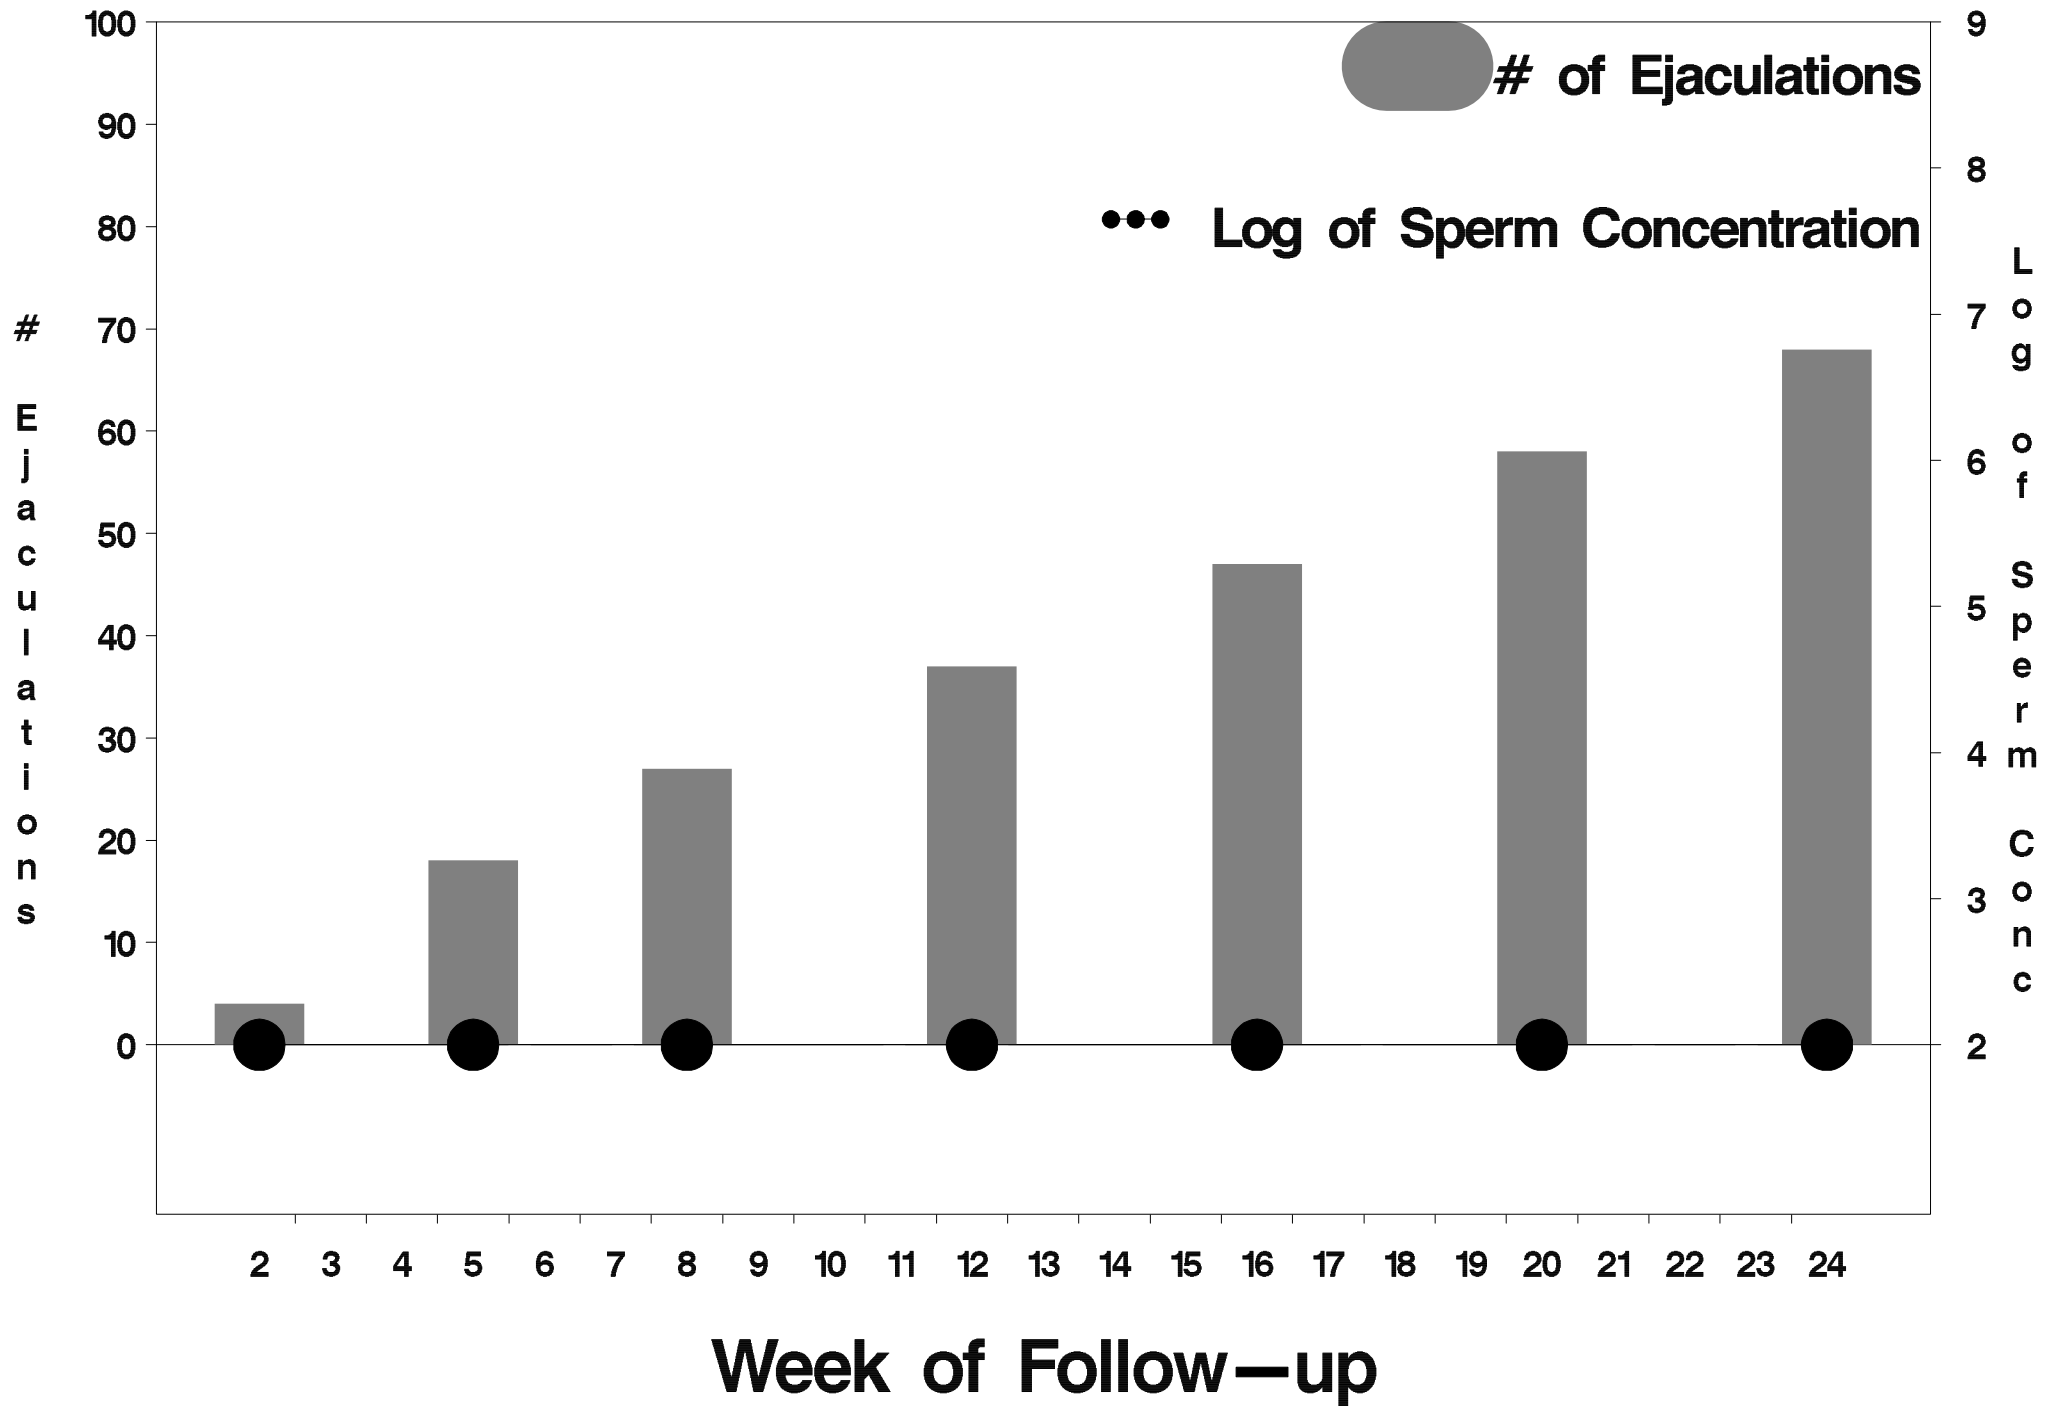

# Participant number= 589

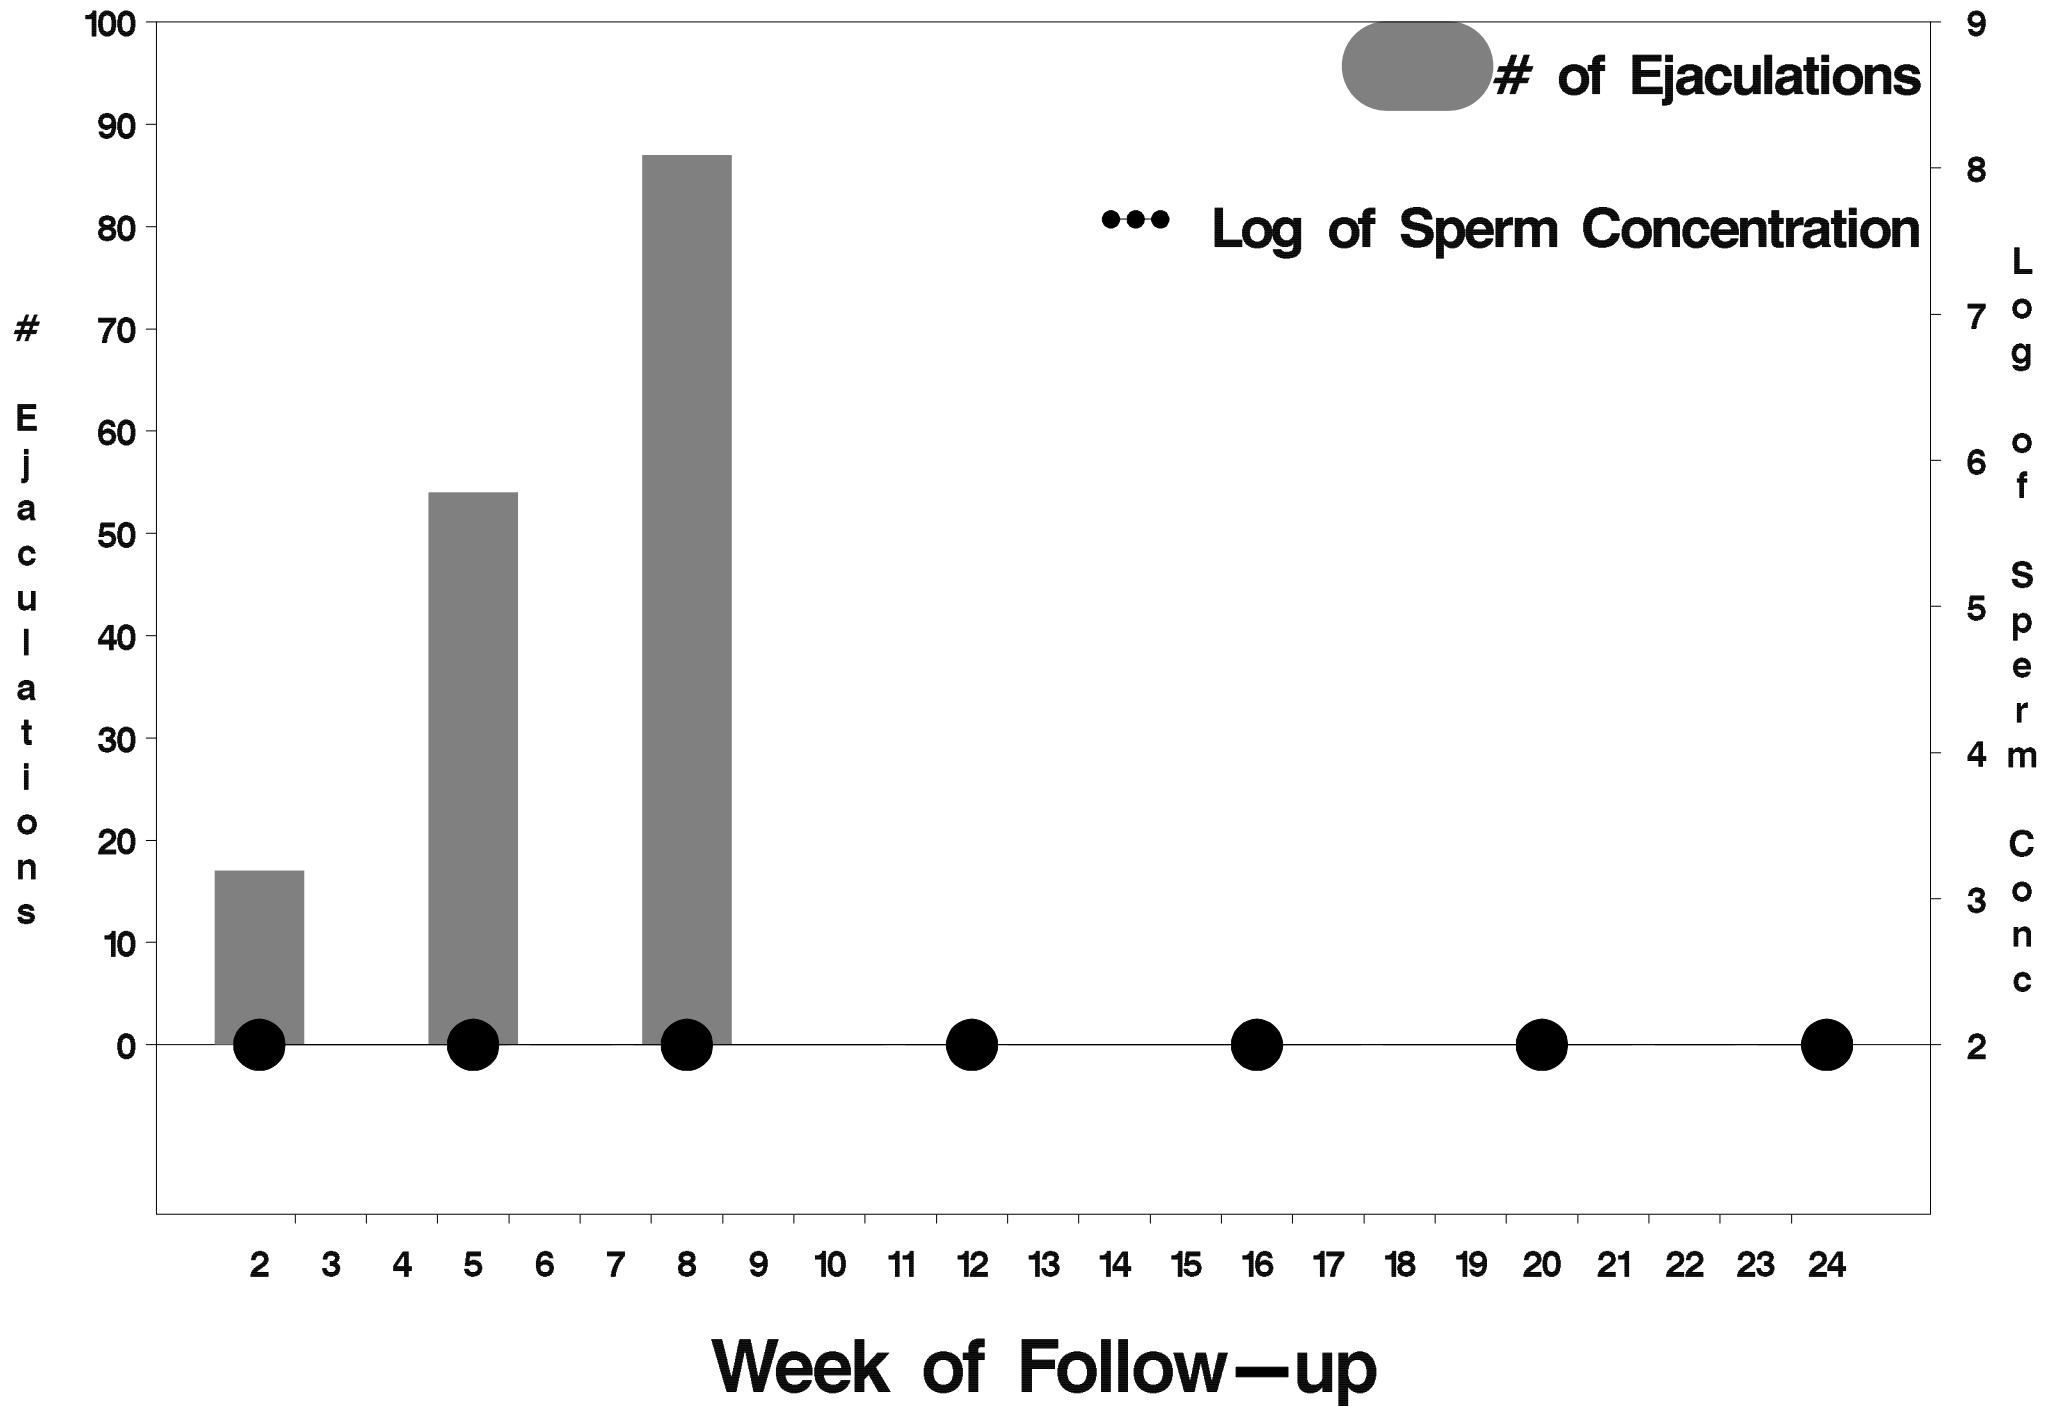

# Participant number= 591

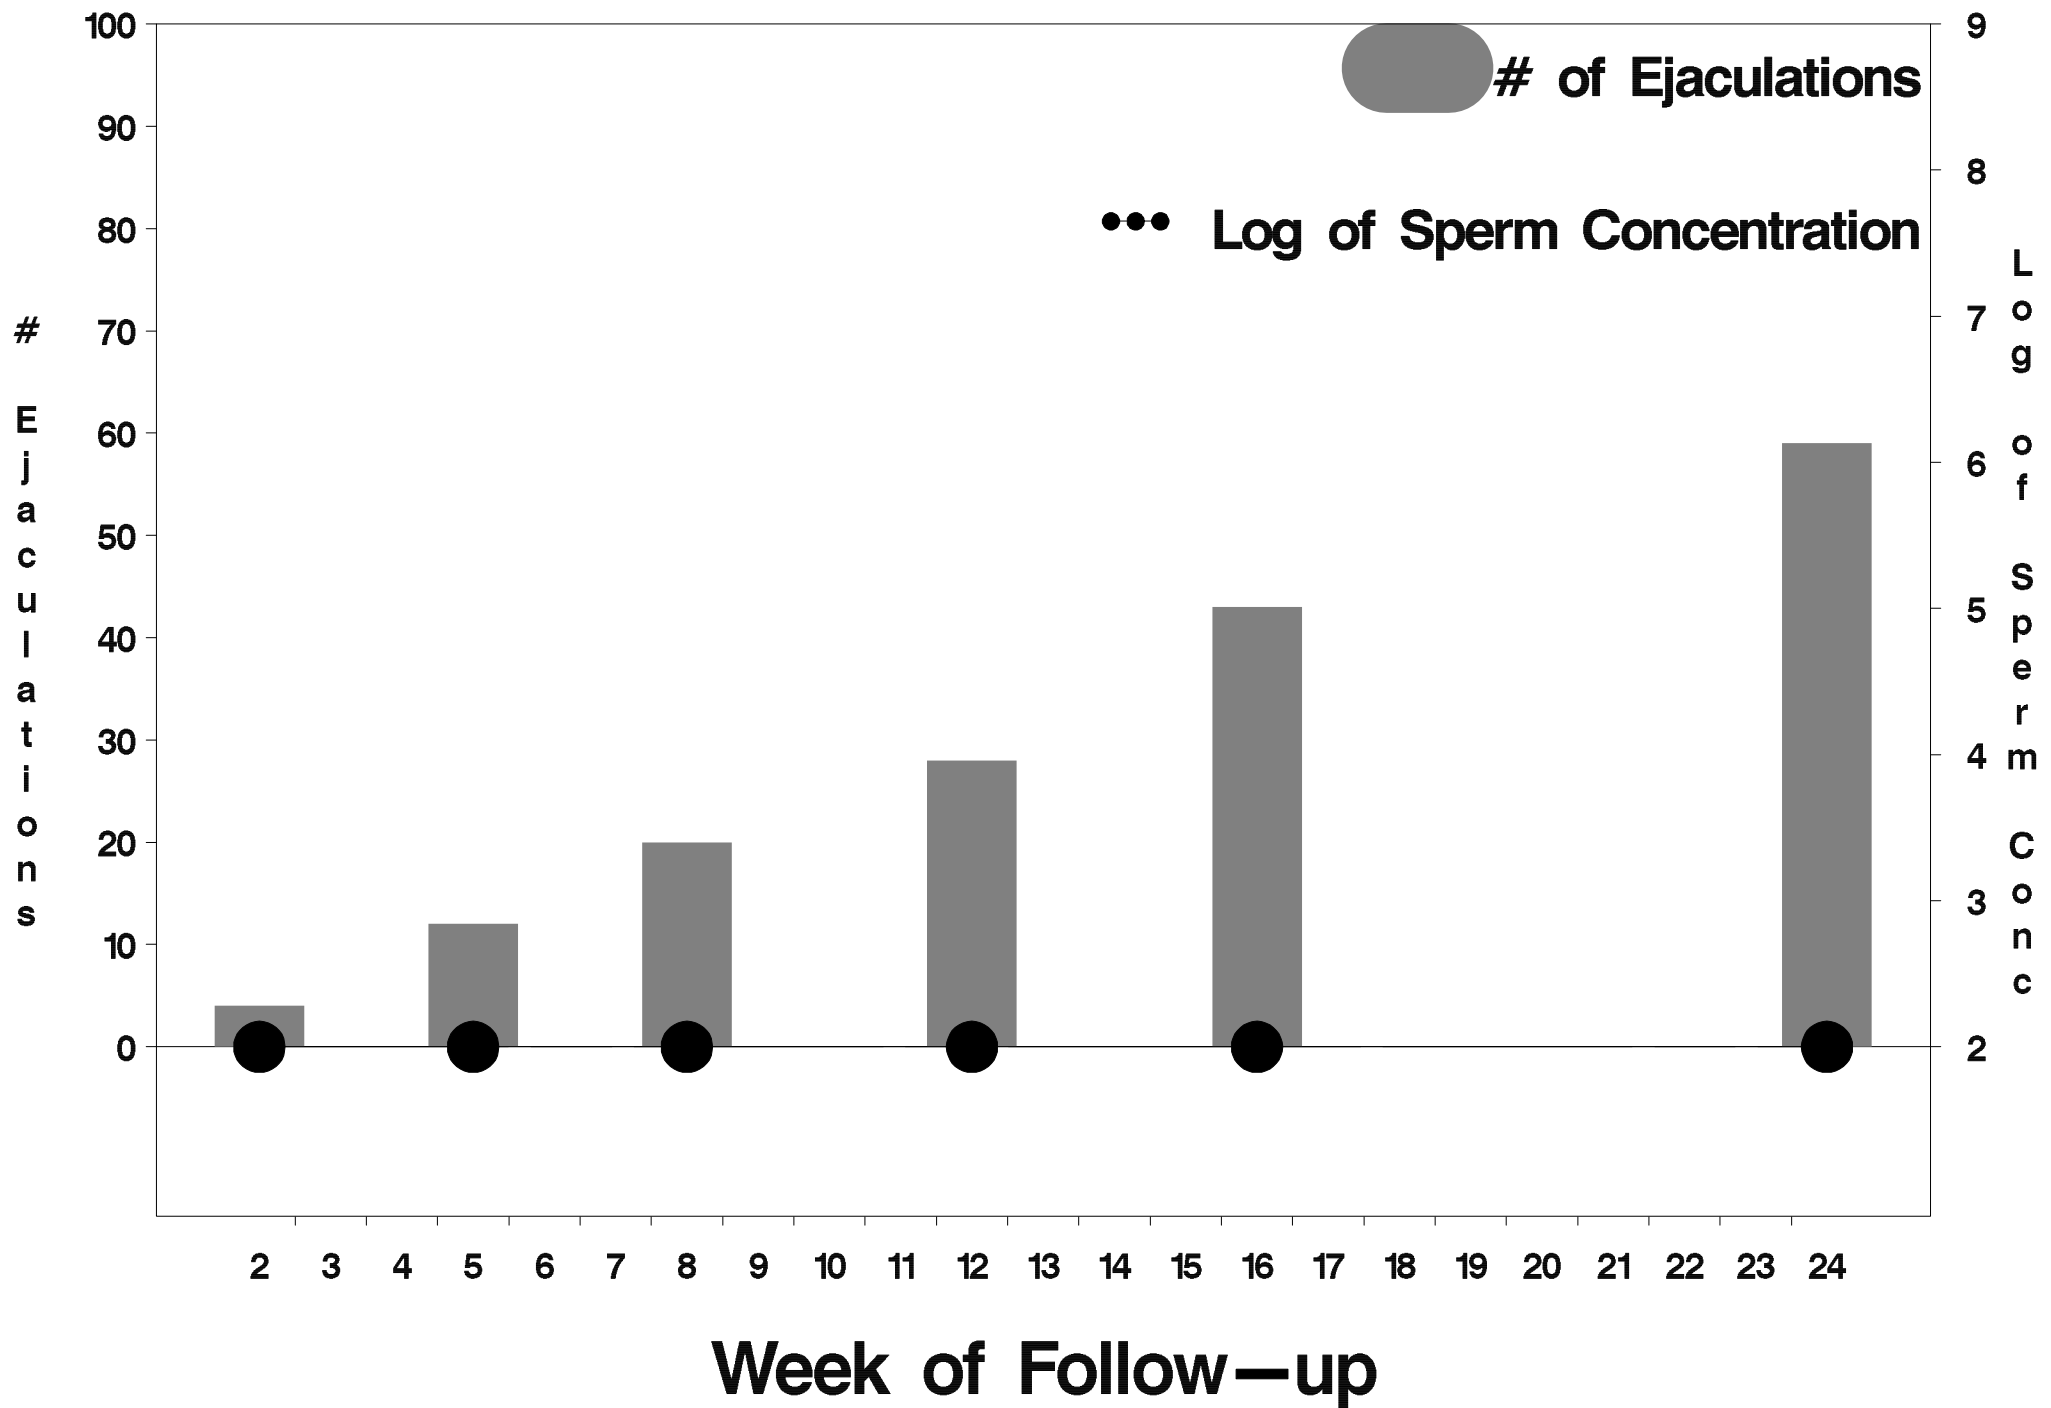

# Participant number= 592

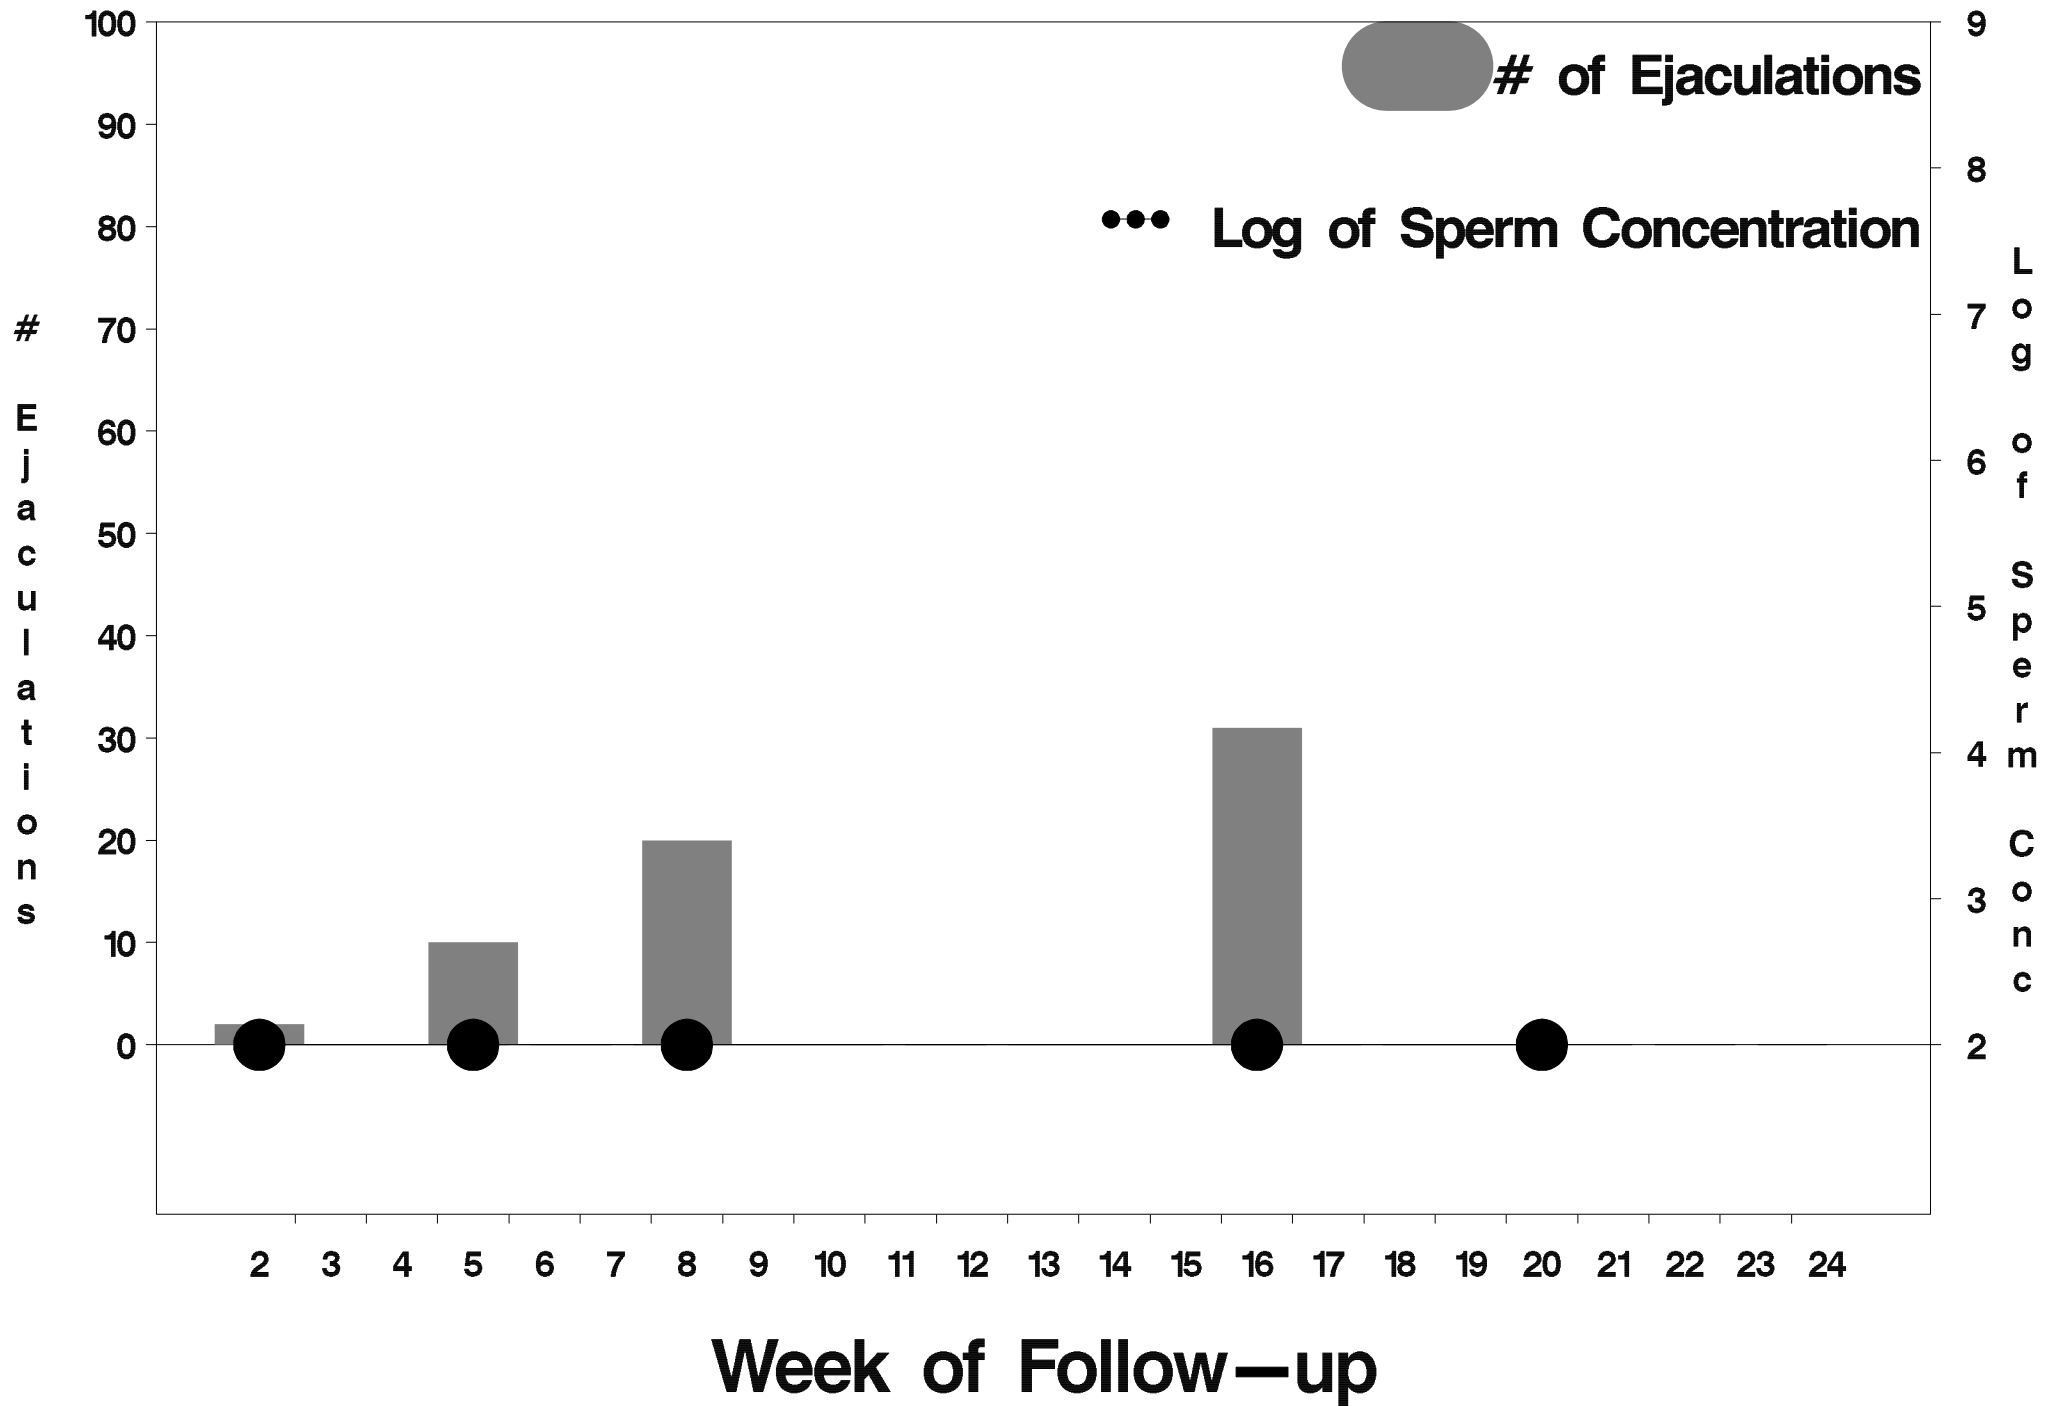

# Participant number= 593

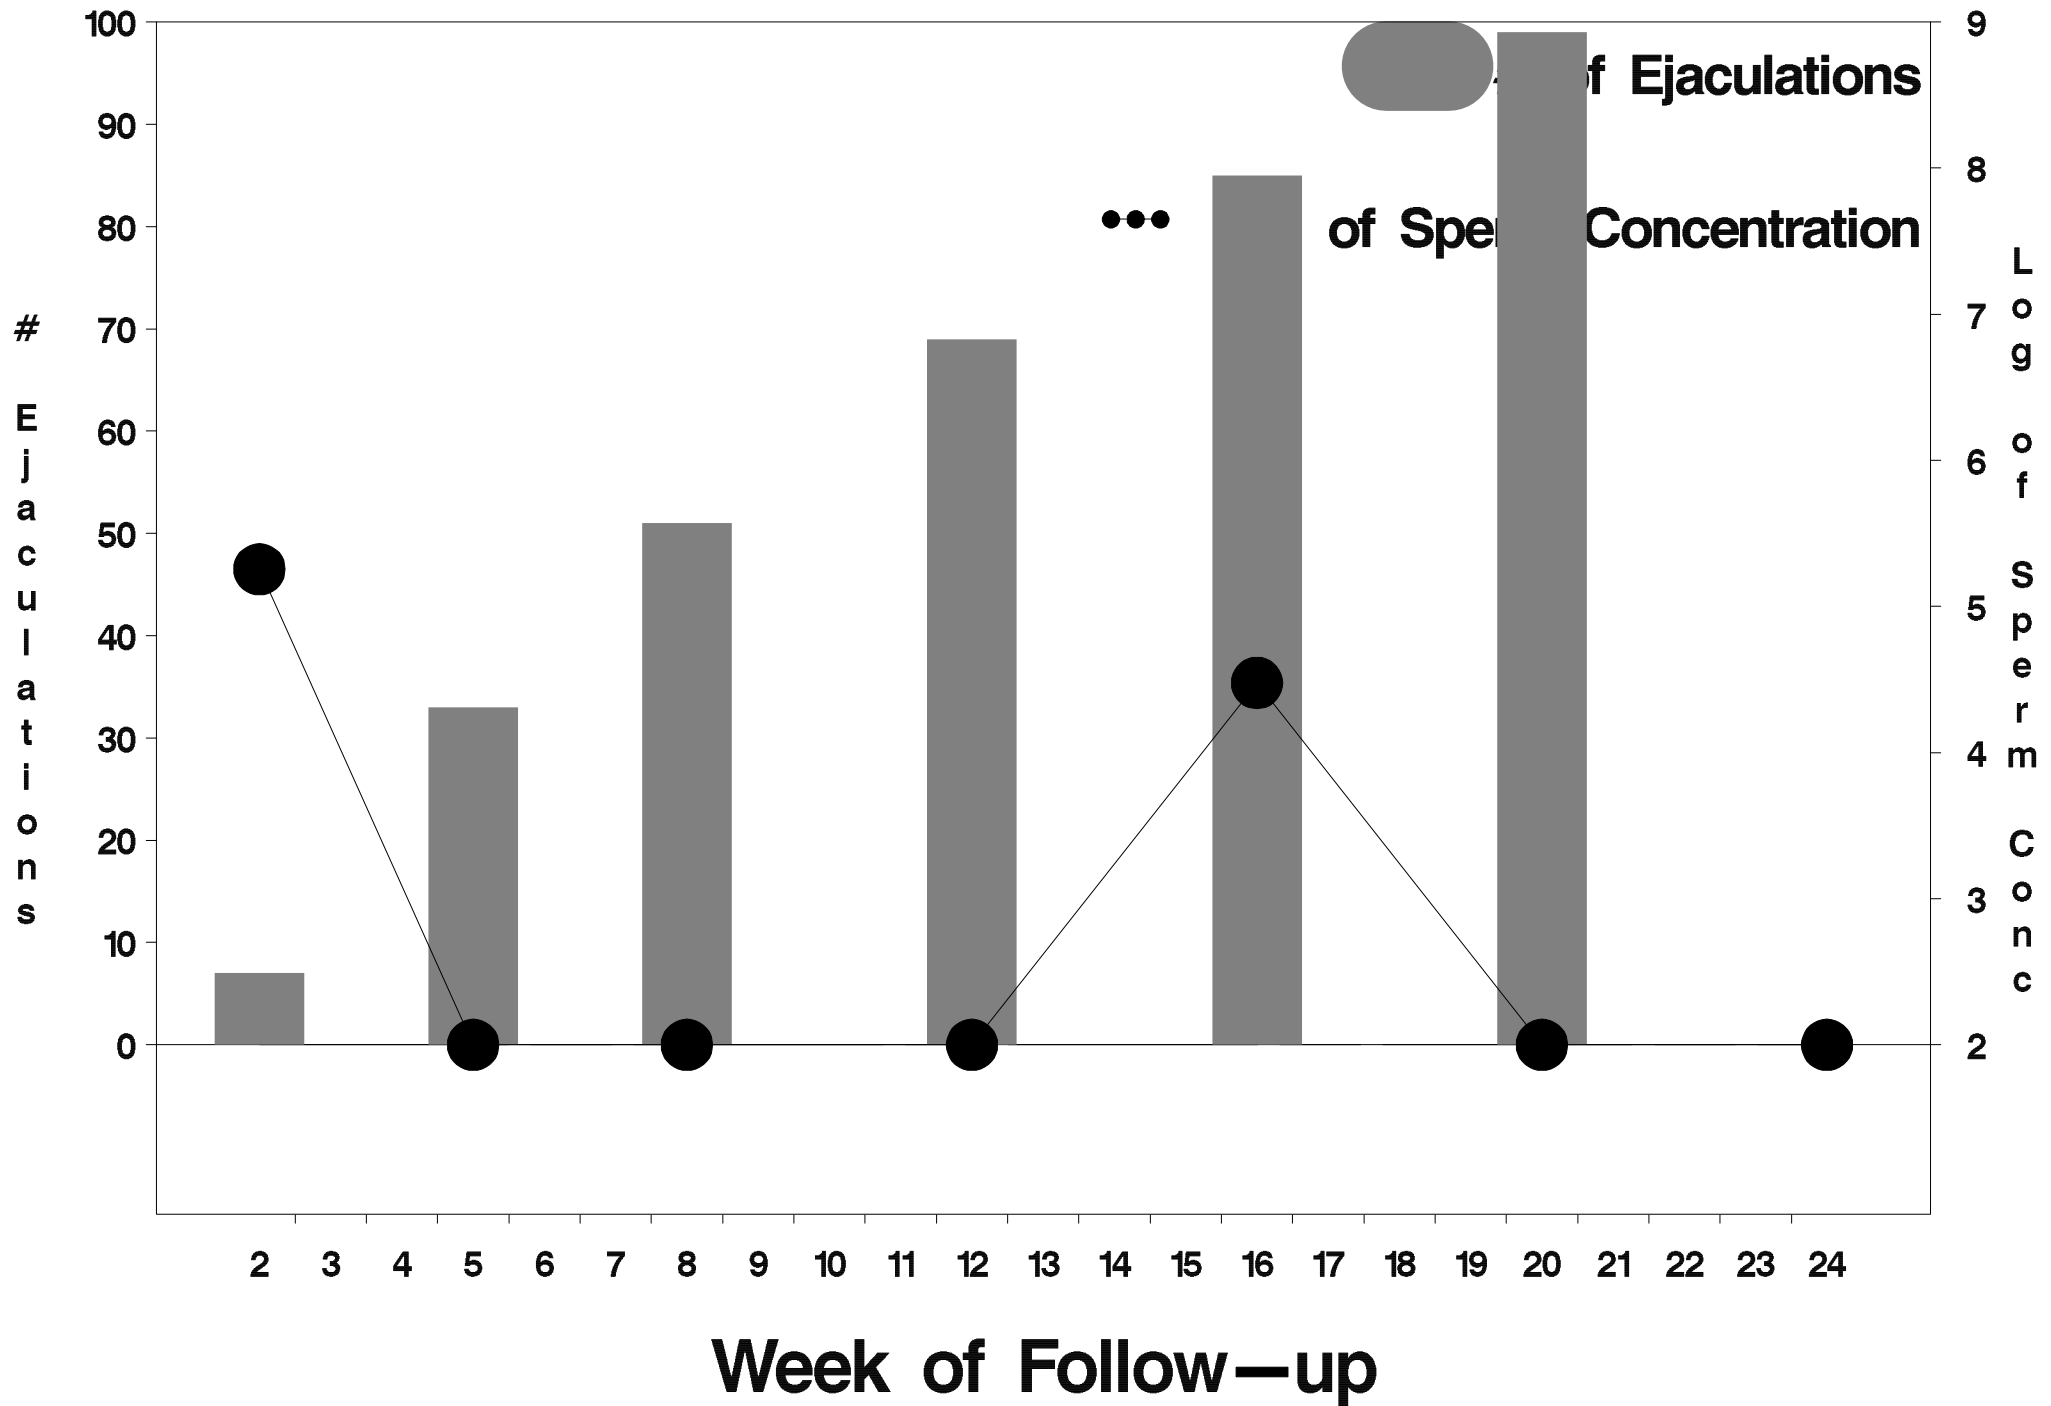

# Participant number= 594

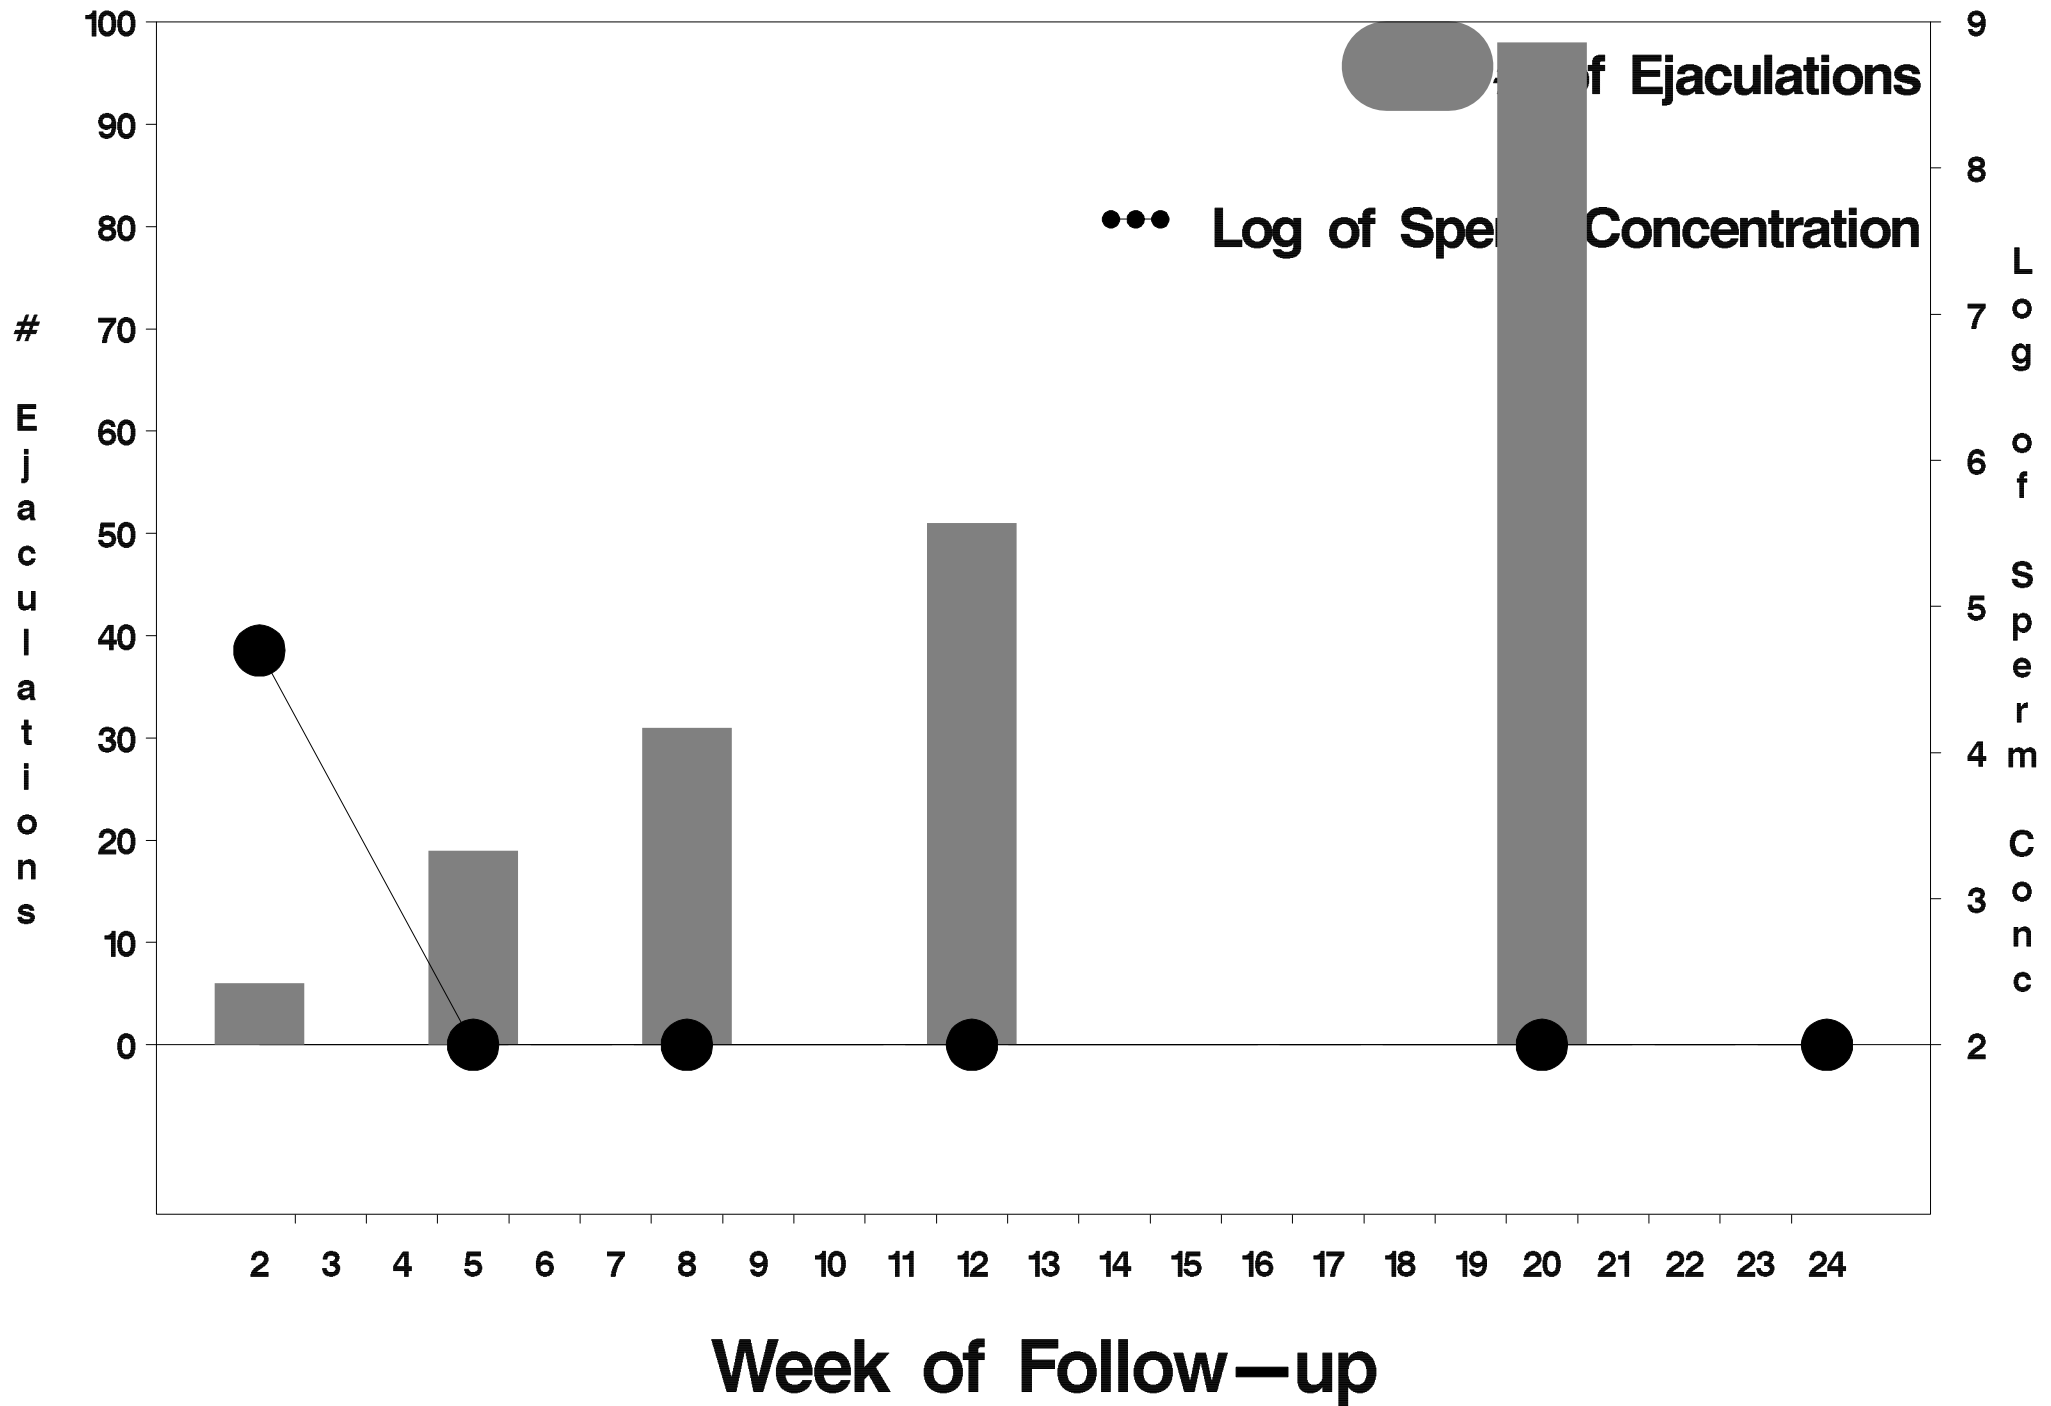

# Participant number= 595

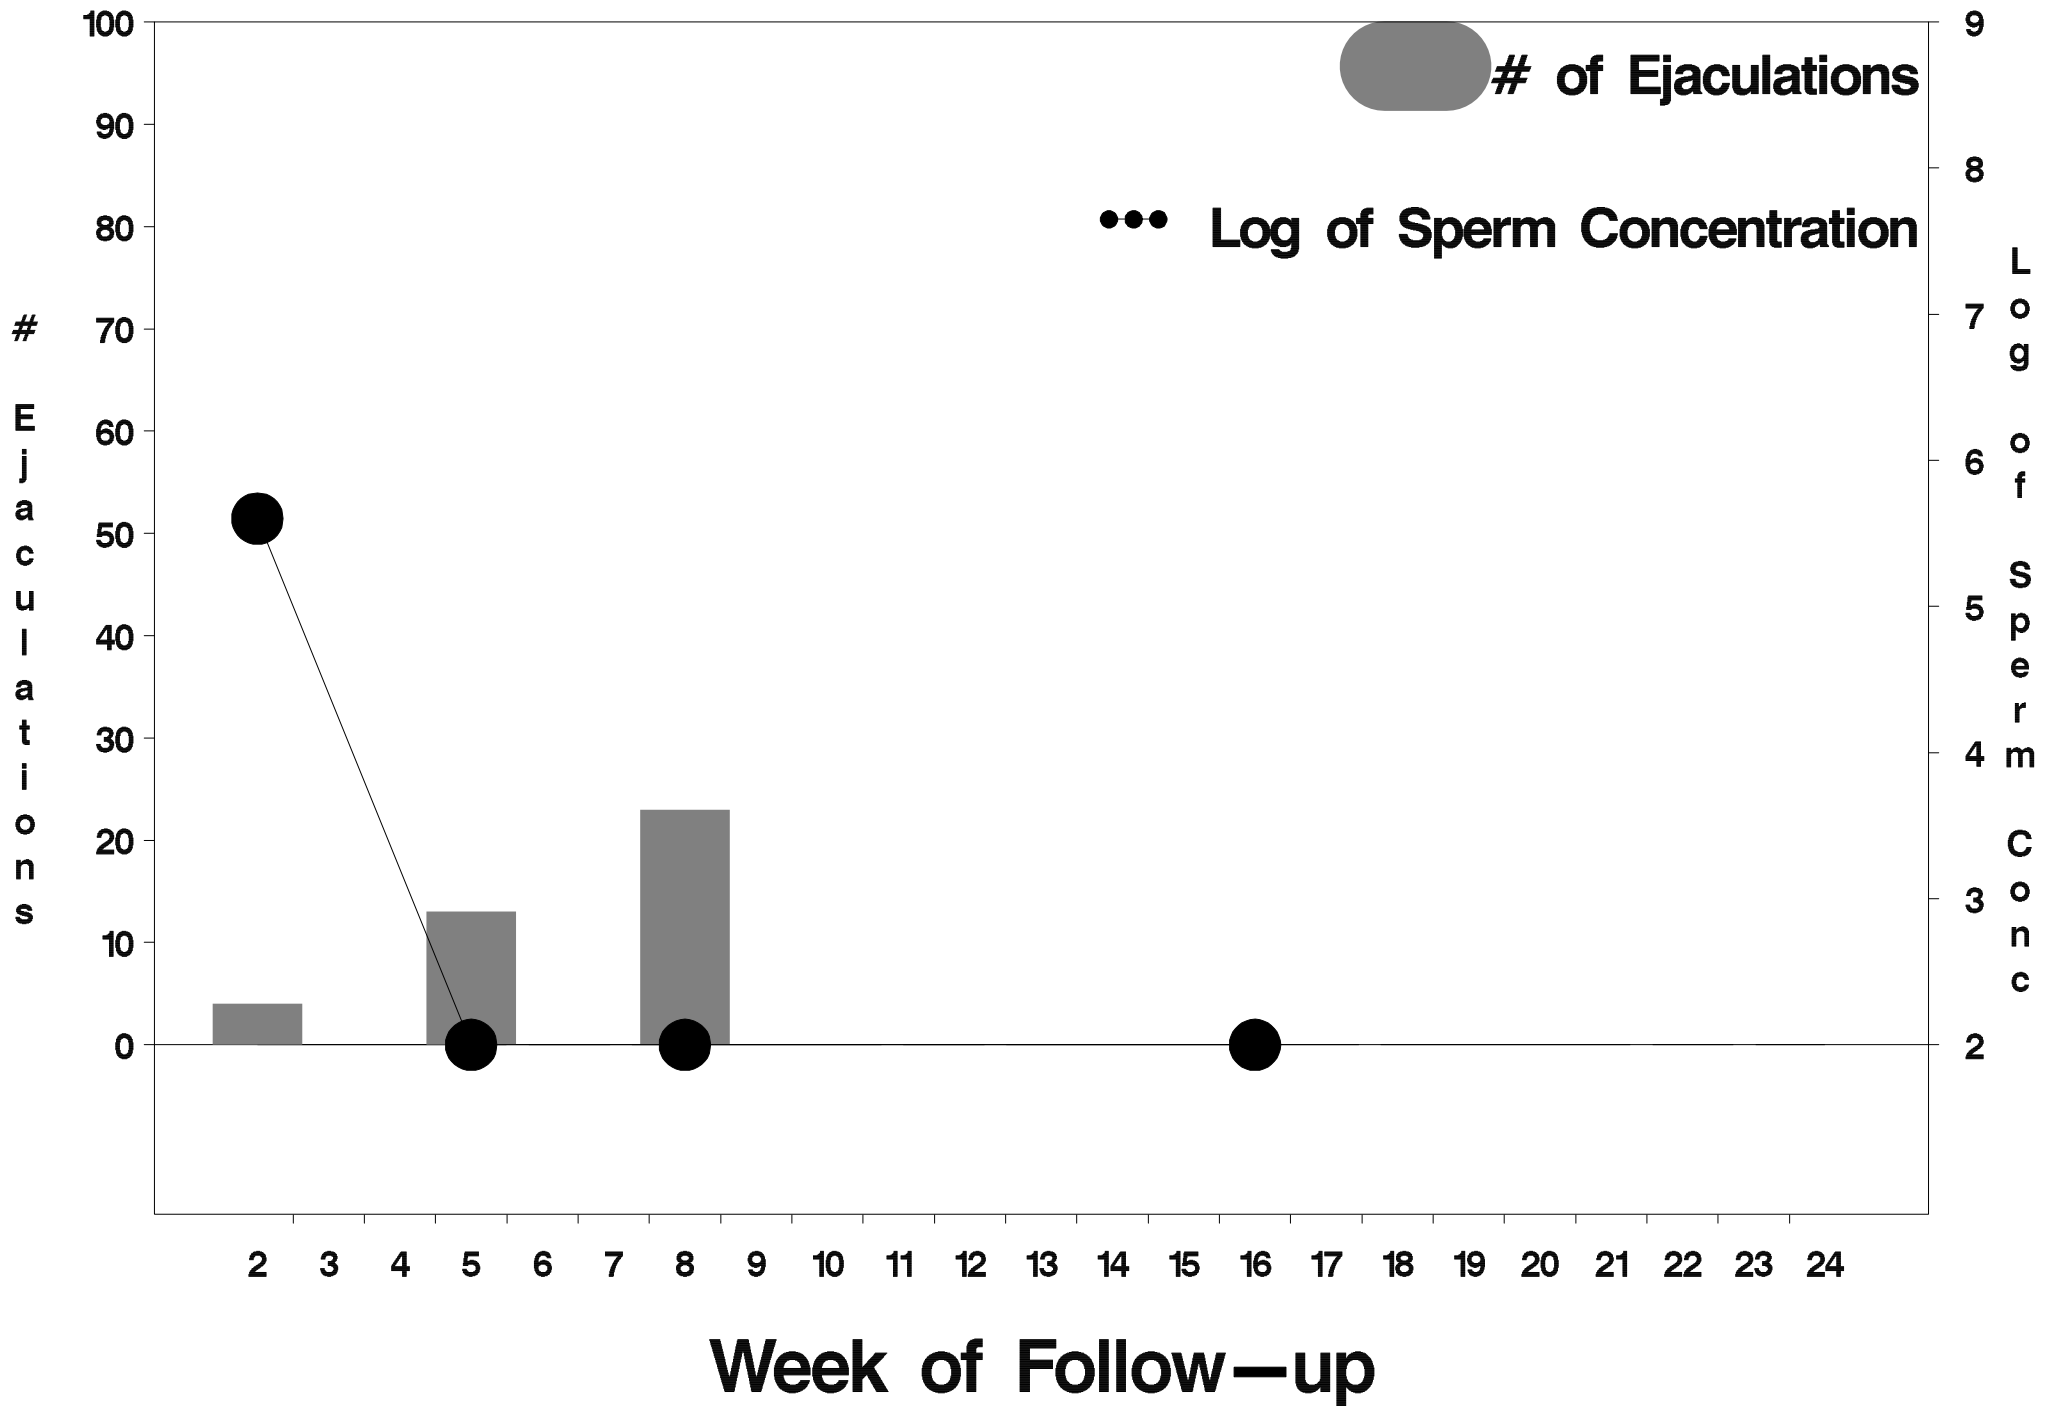

# Participant number= 596

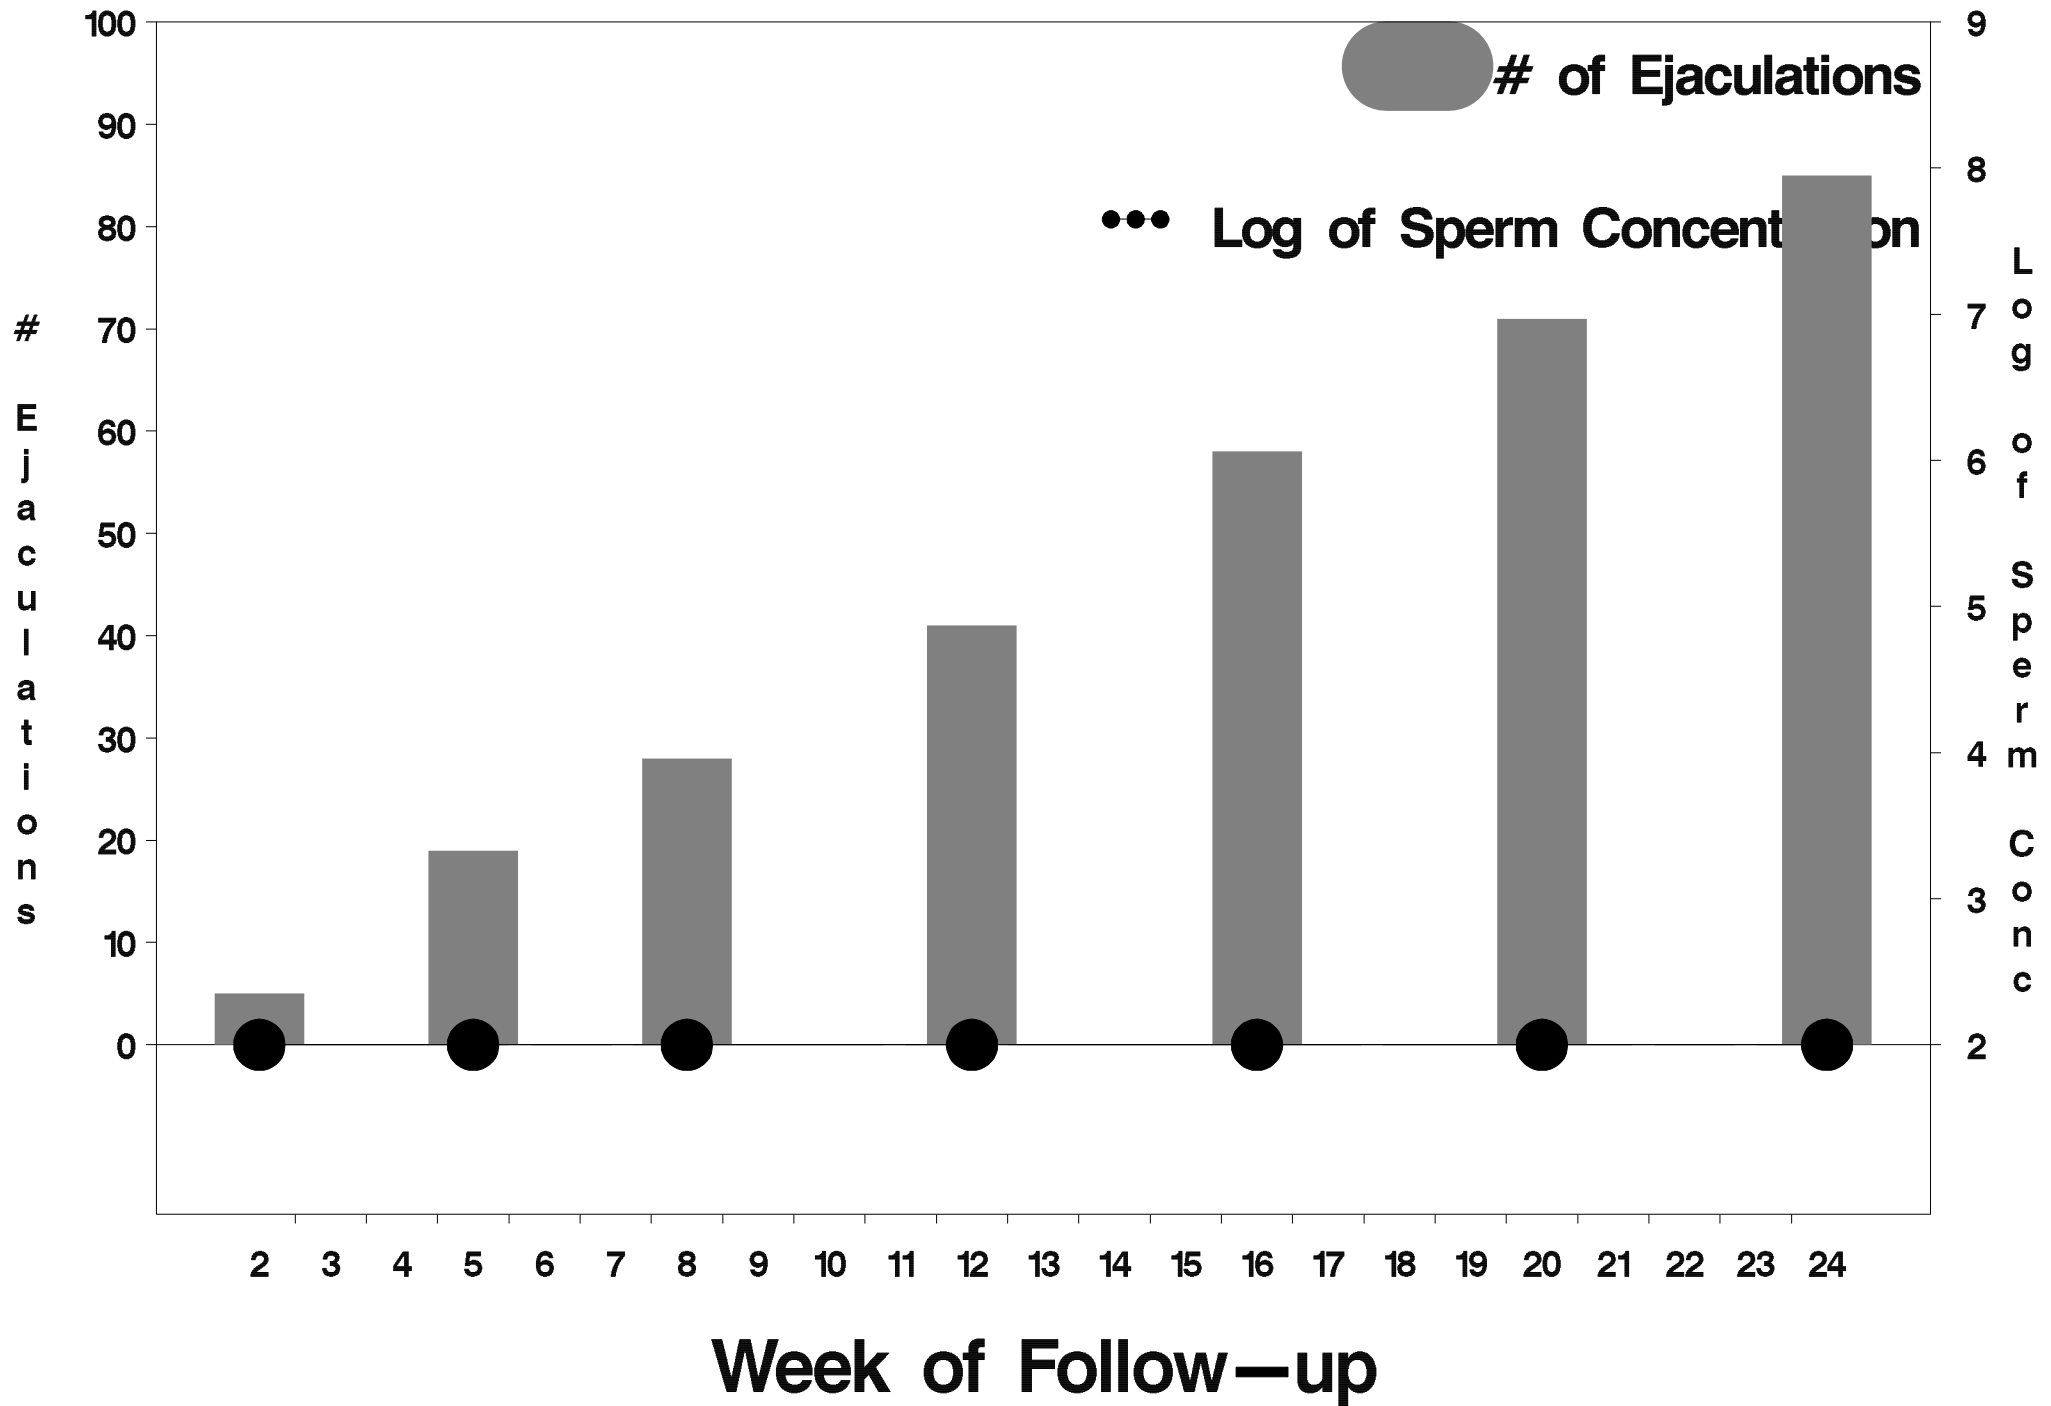



# Participant number= 597

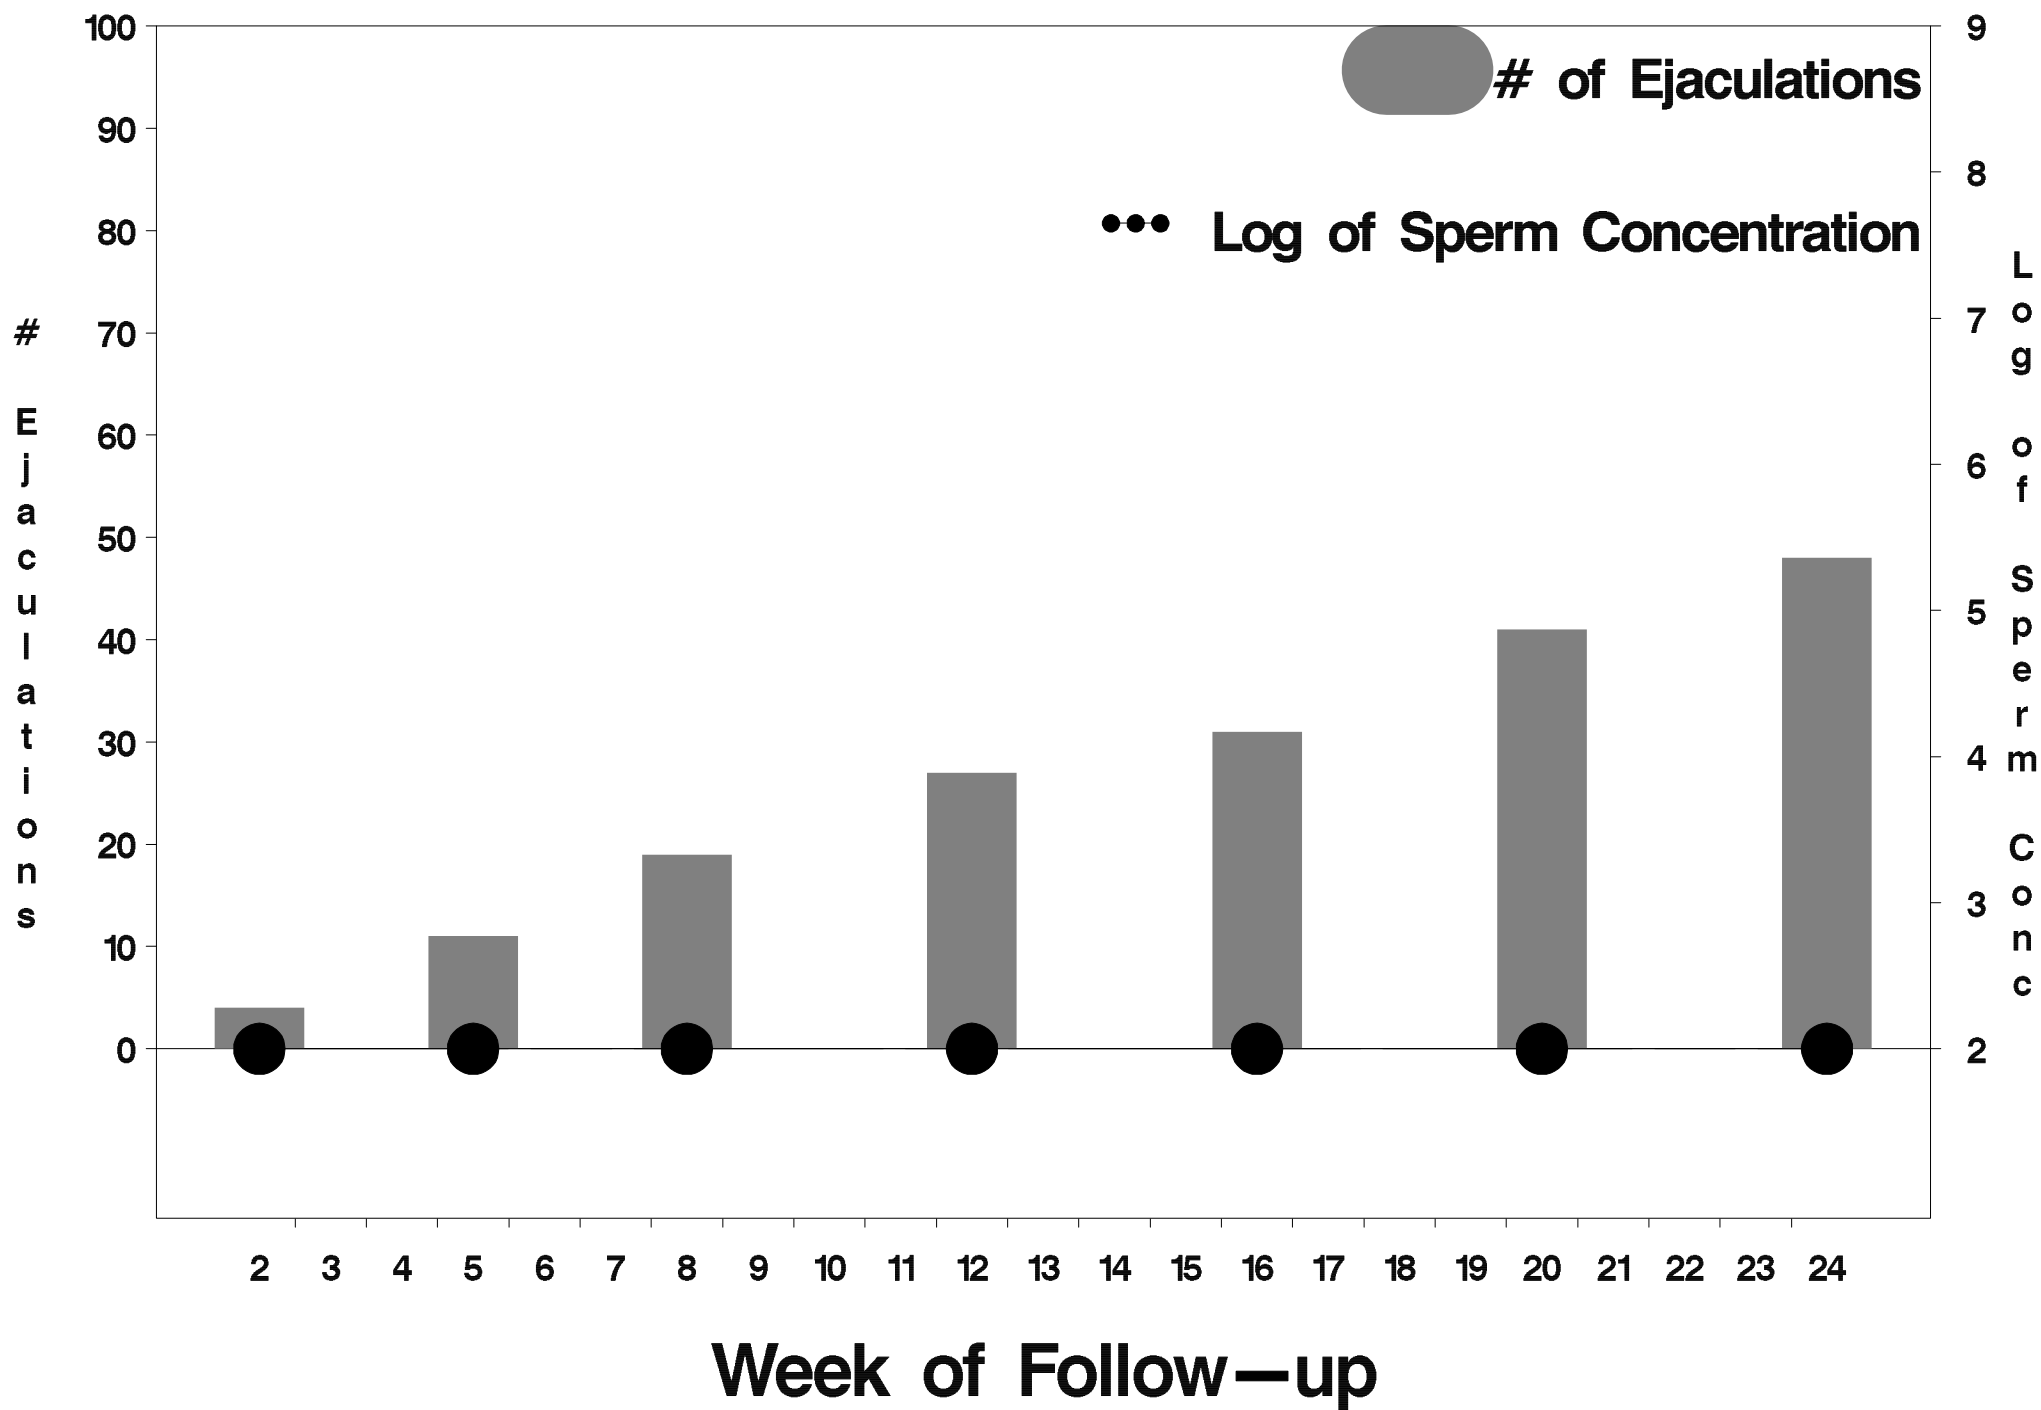

# Participant number= 598

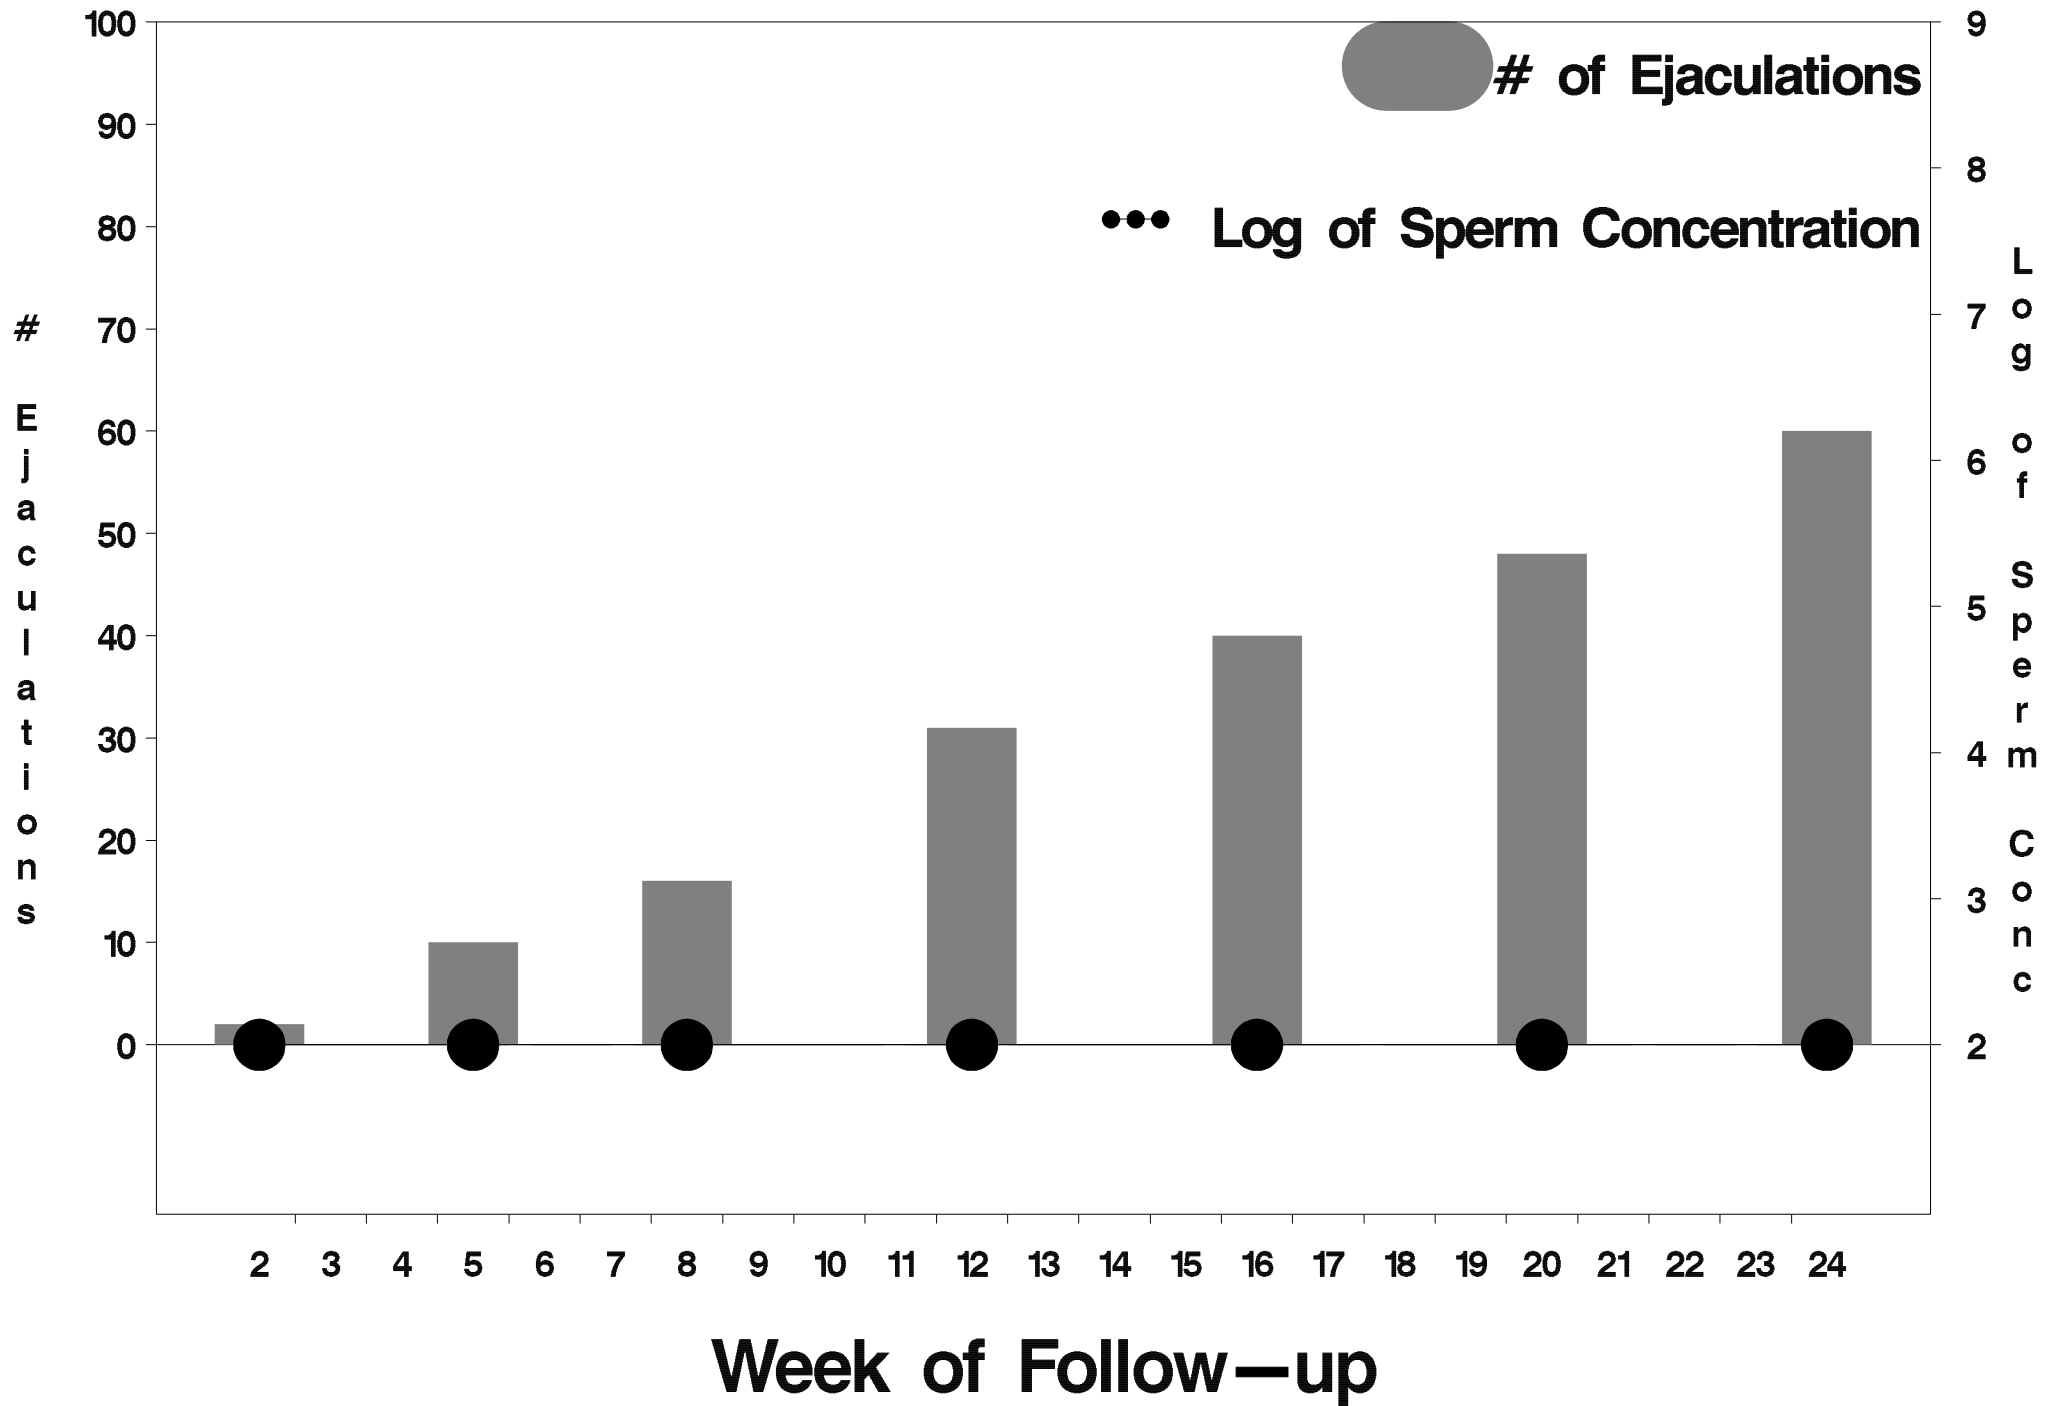

# Participant number= 599

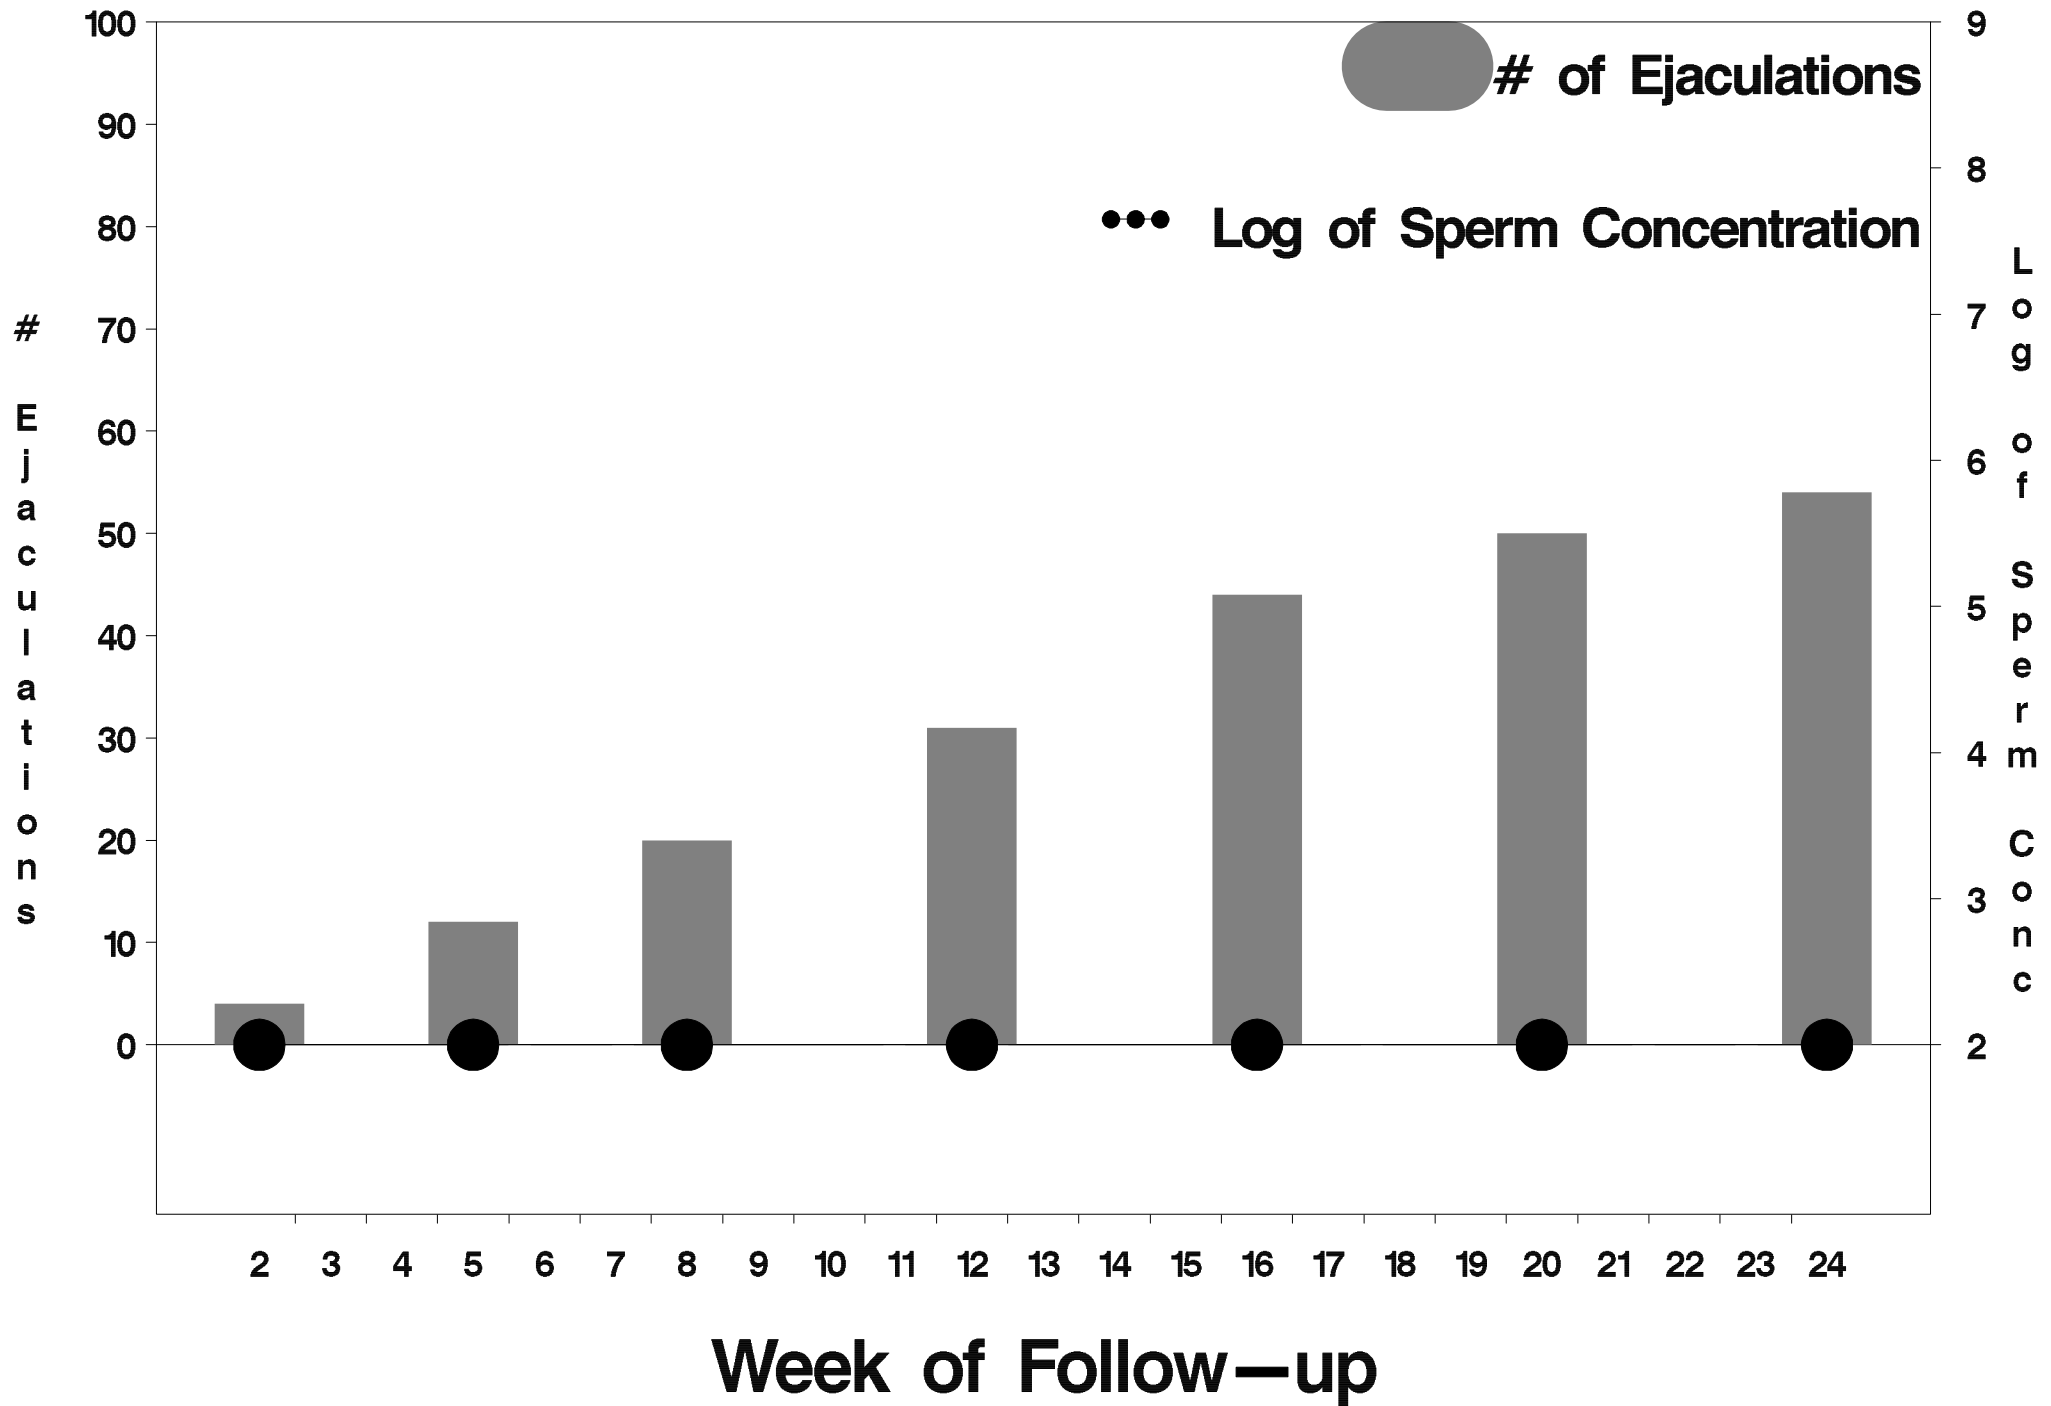



# Participant number= 701

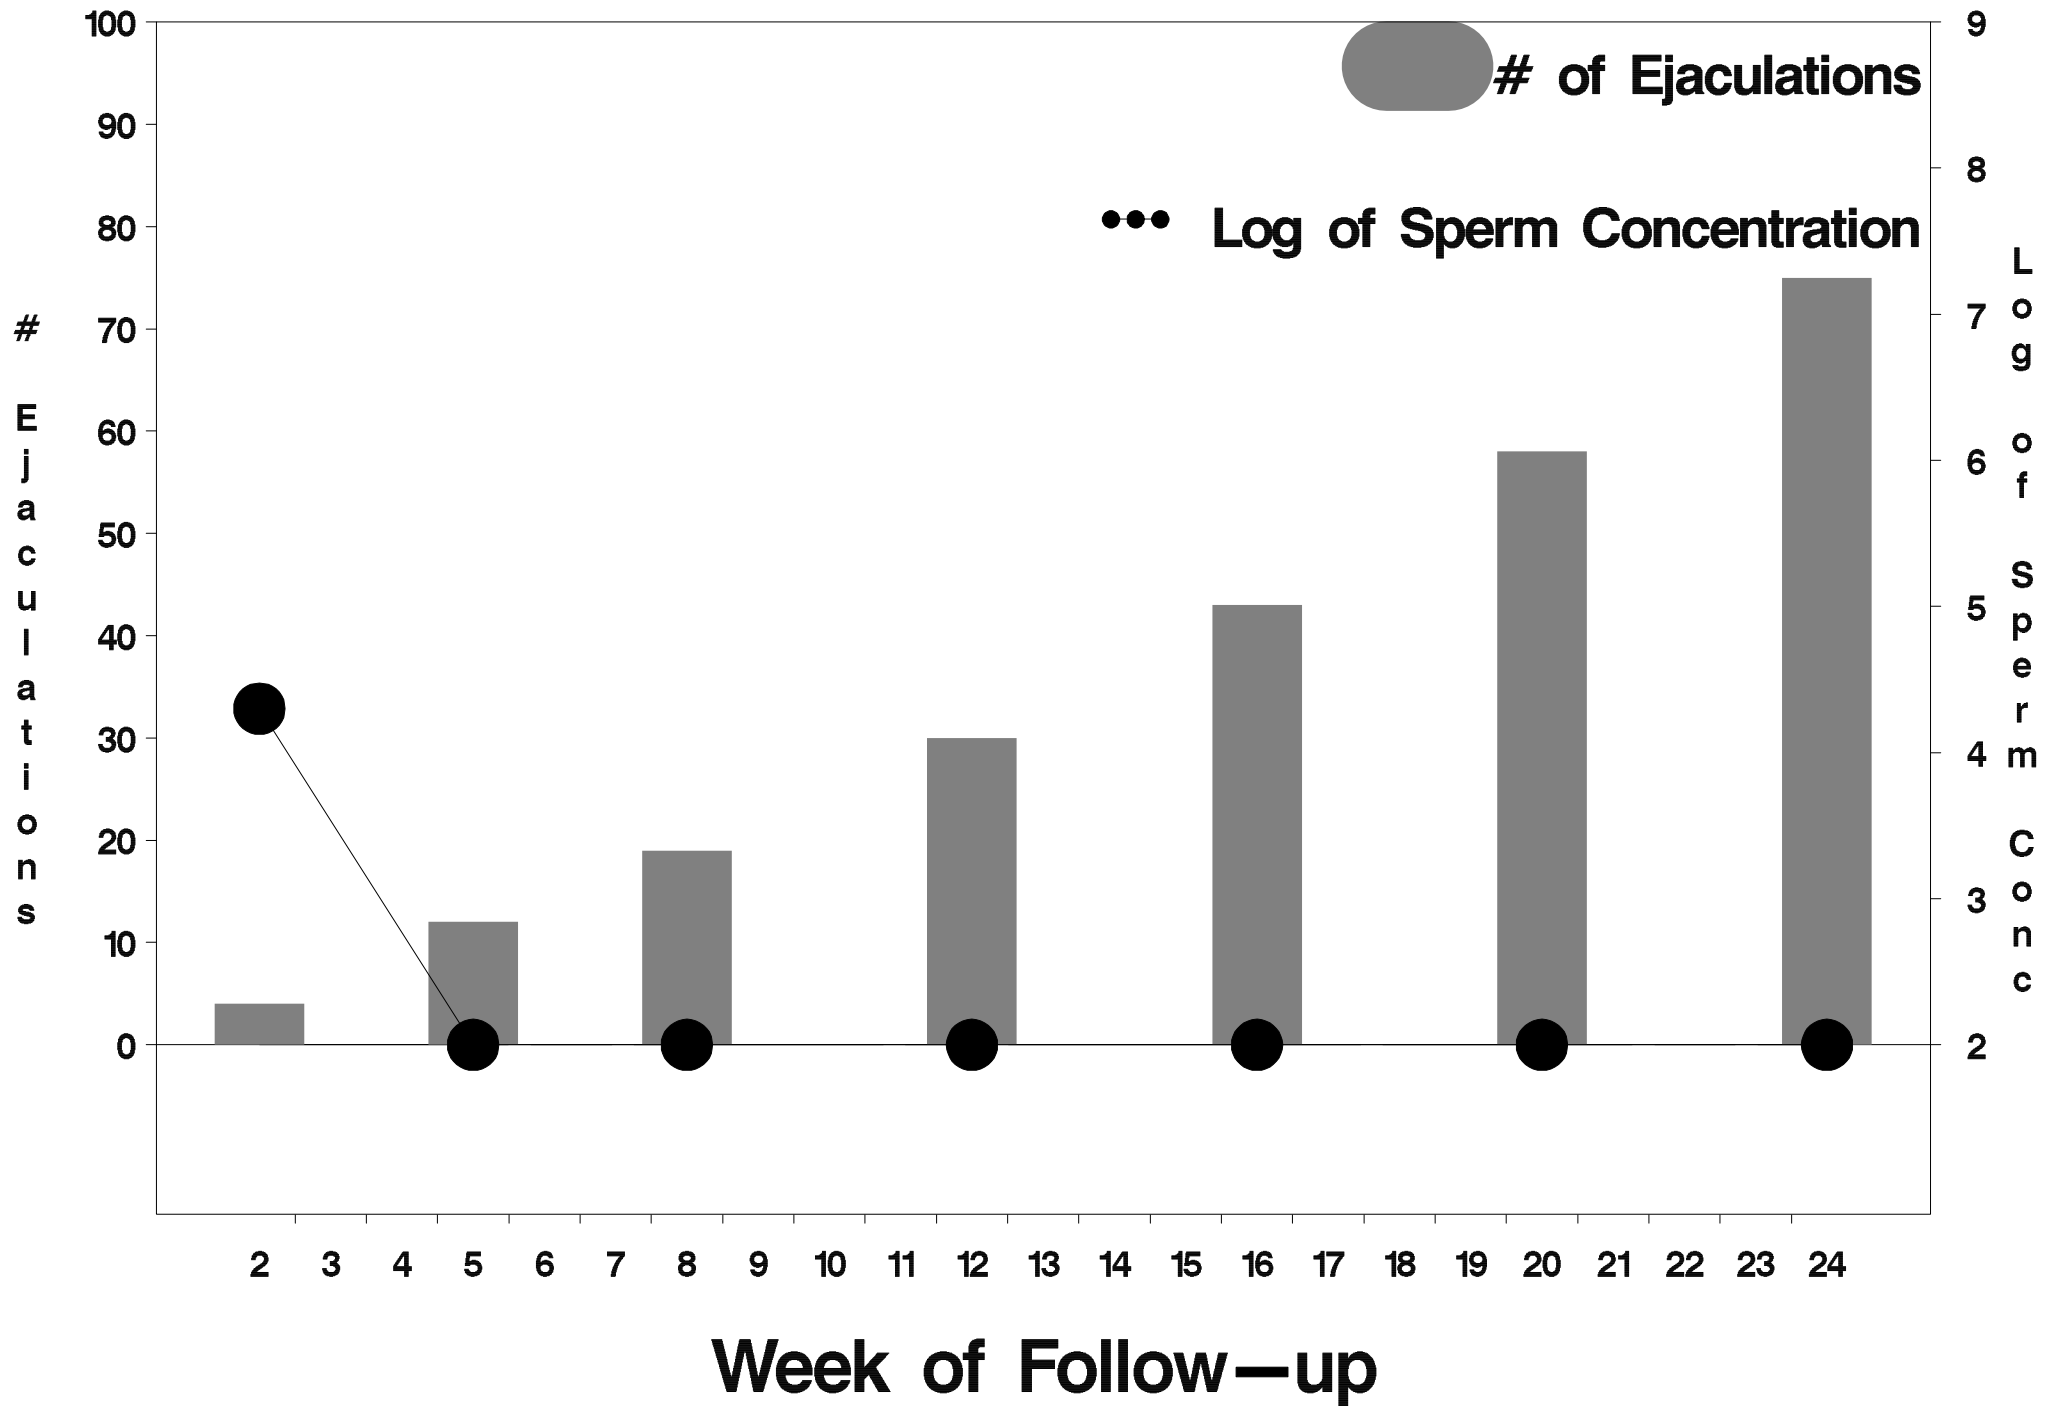

# Participant number= 702

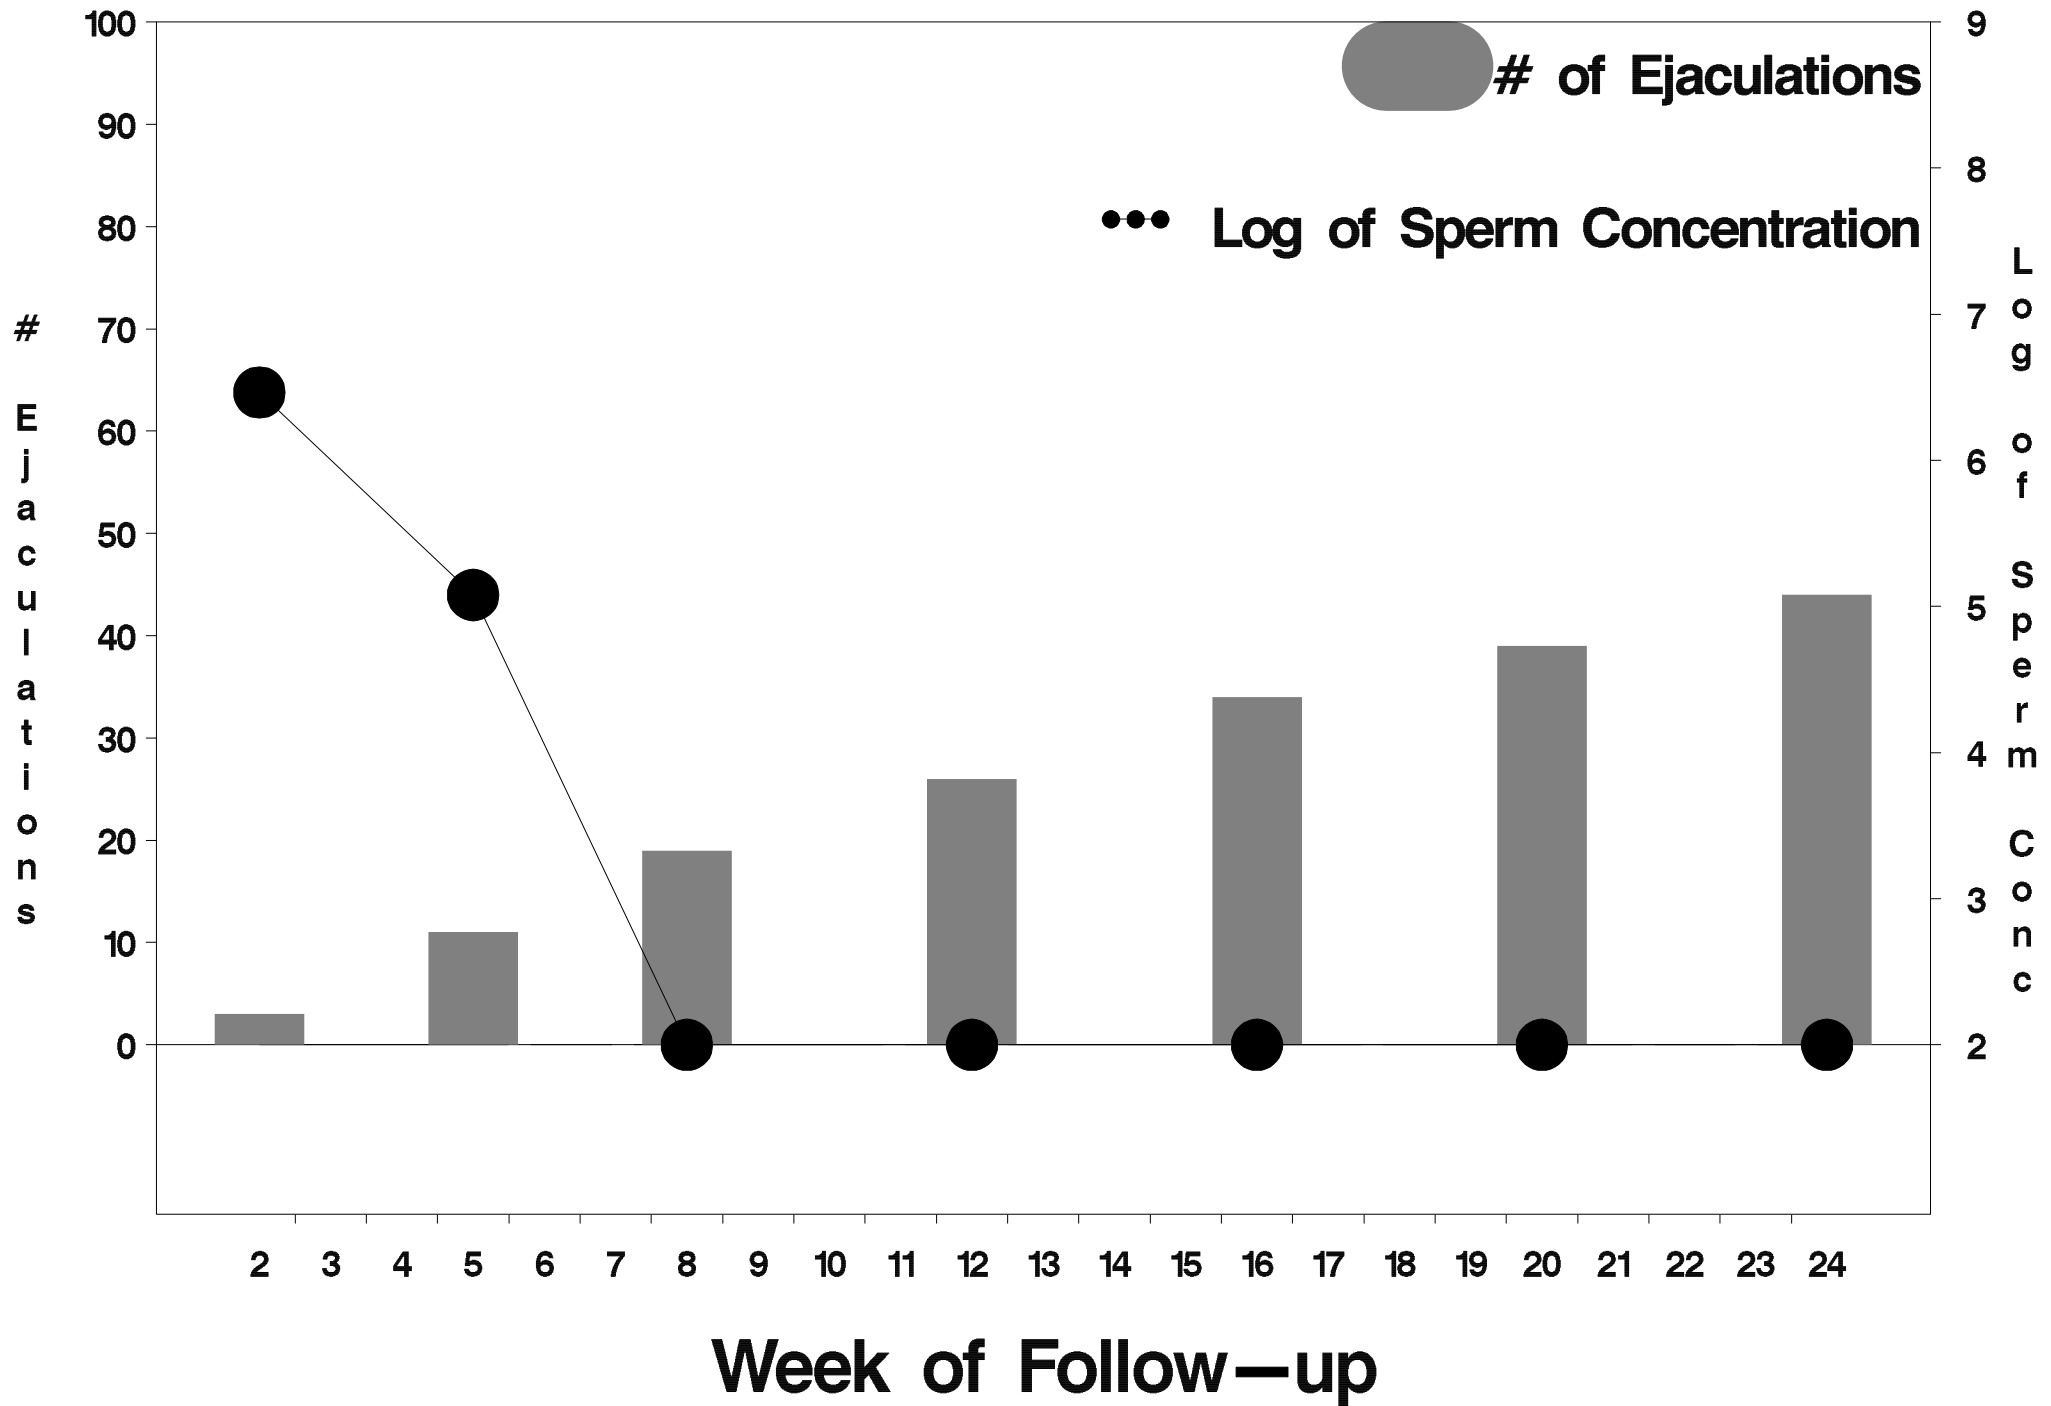

# Participant number= 703

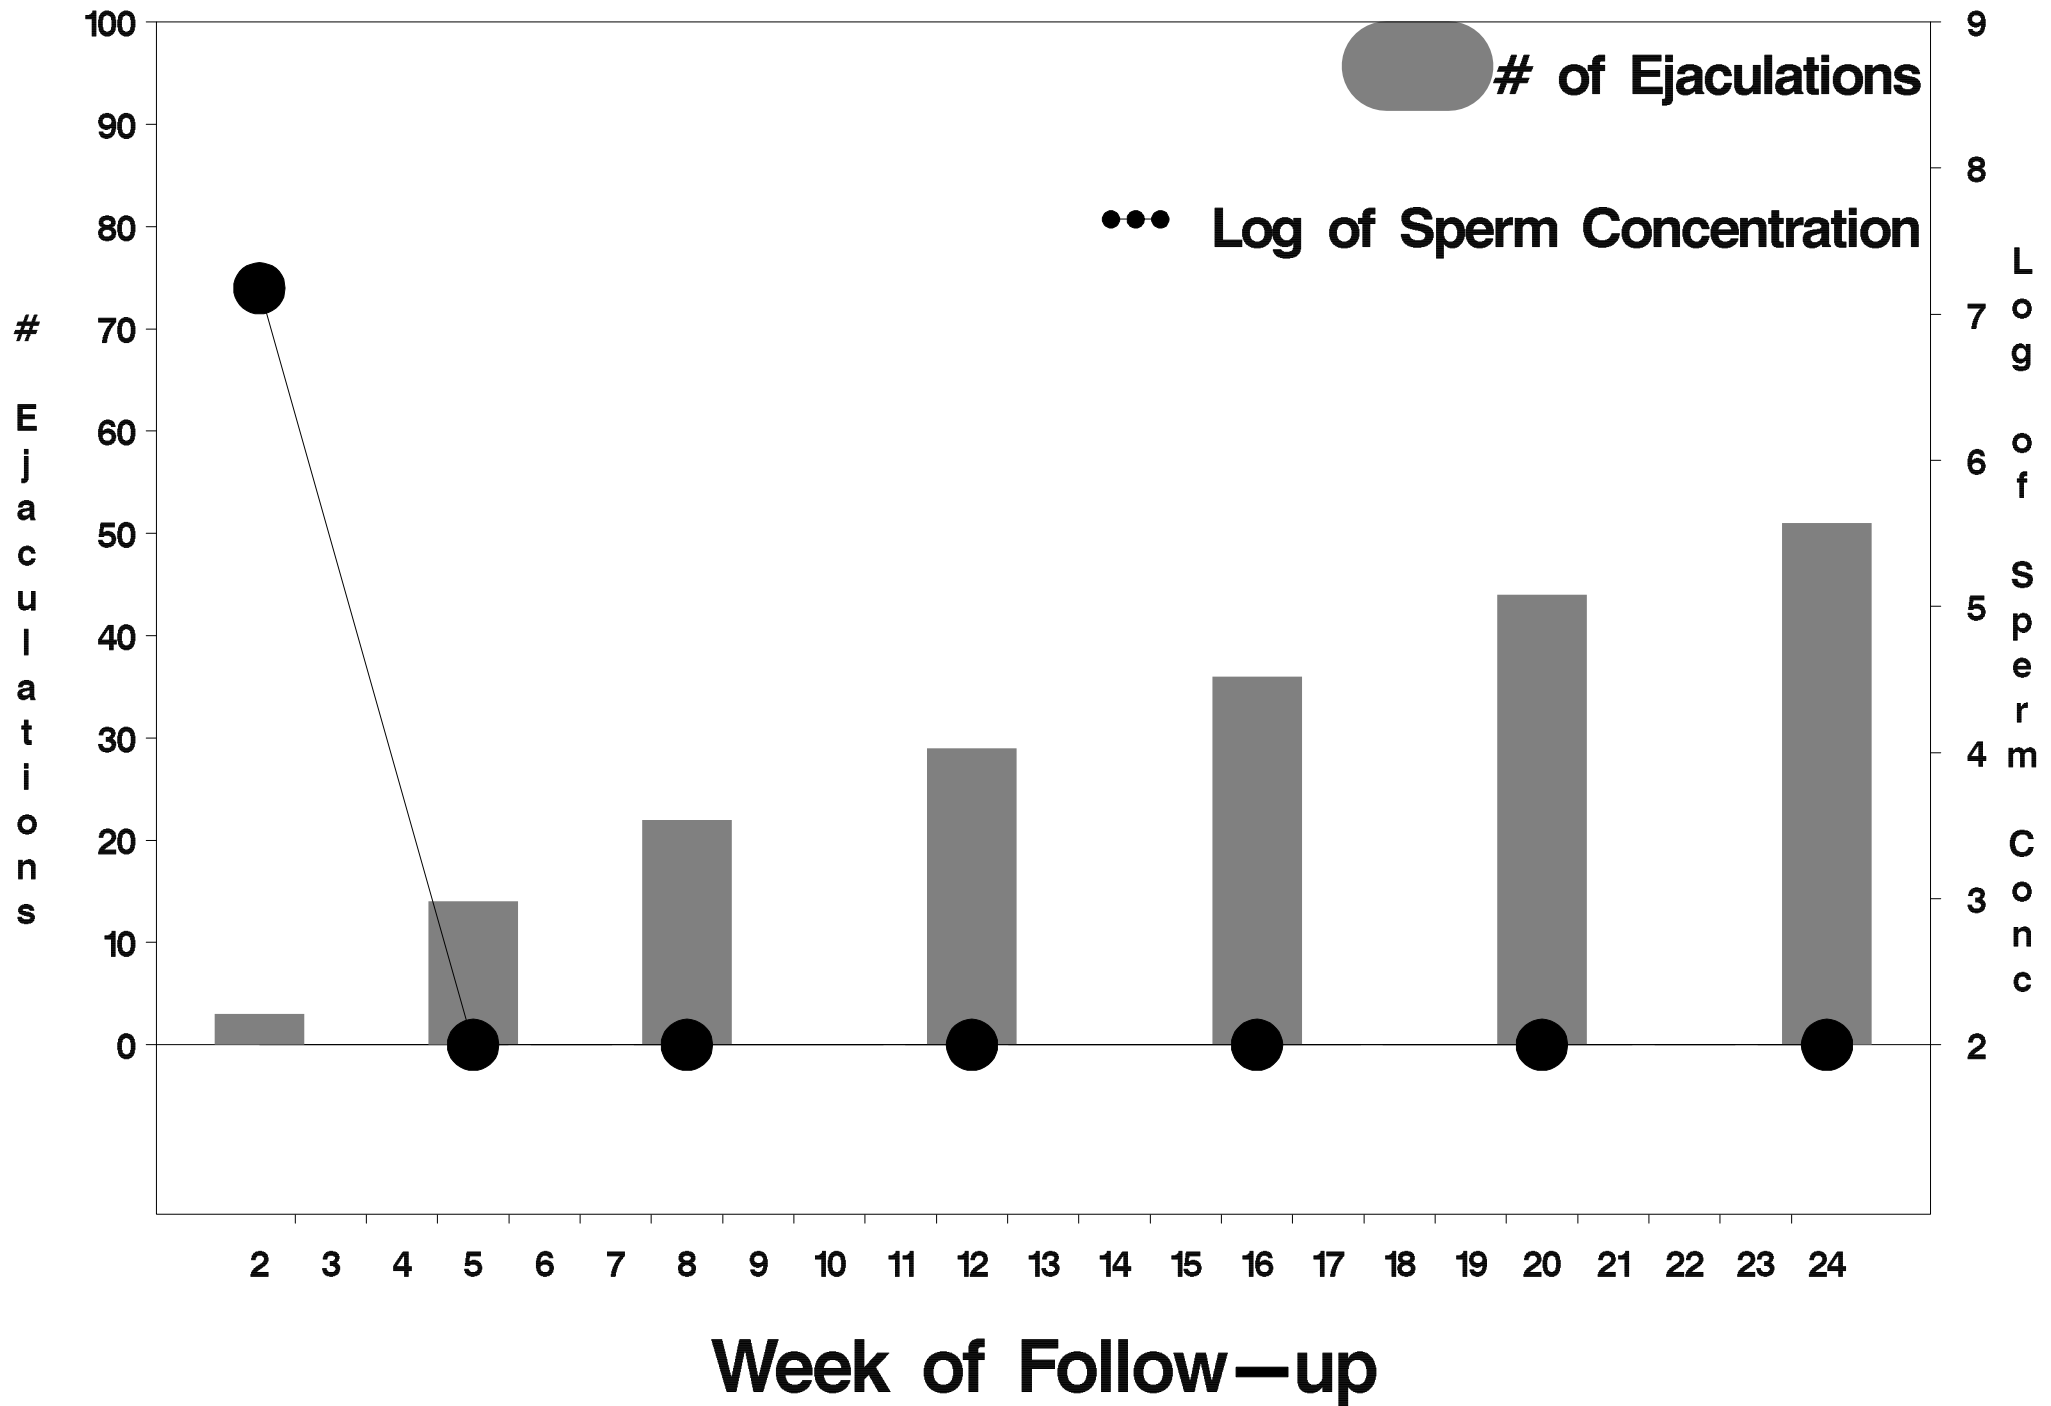

# Participant number= 704

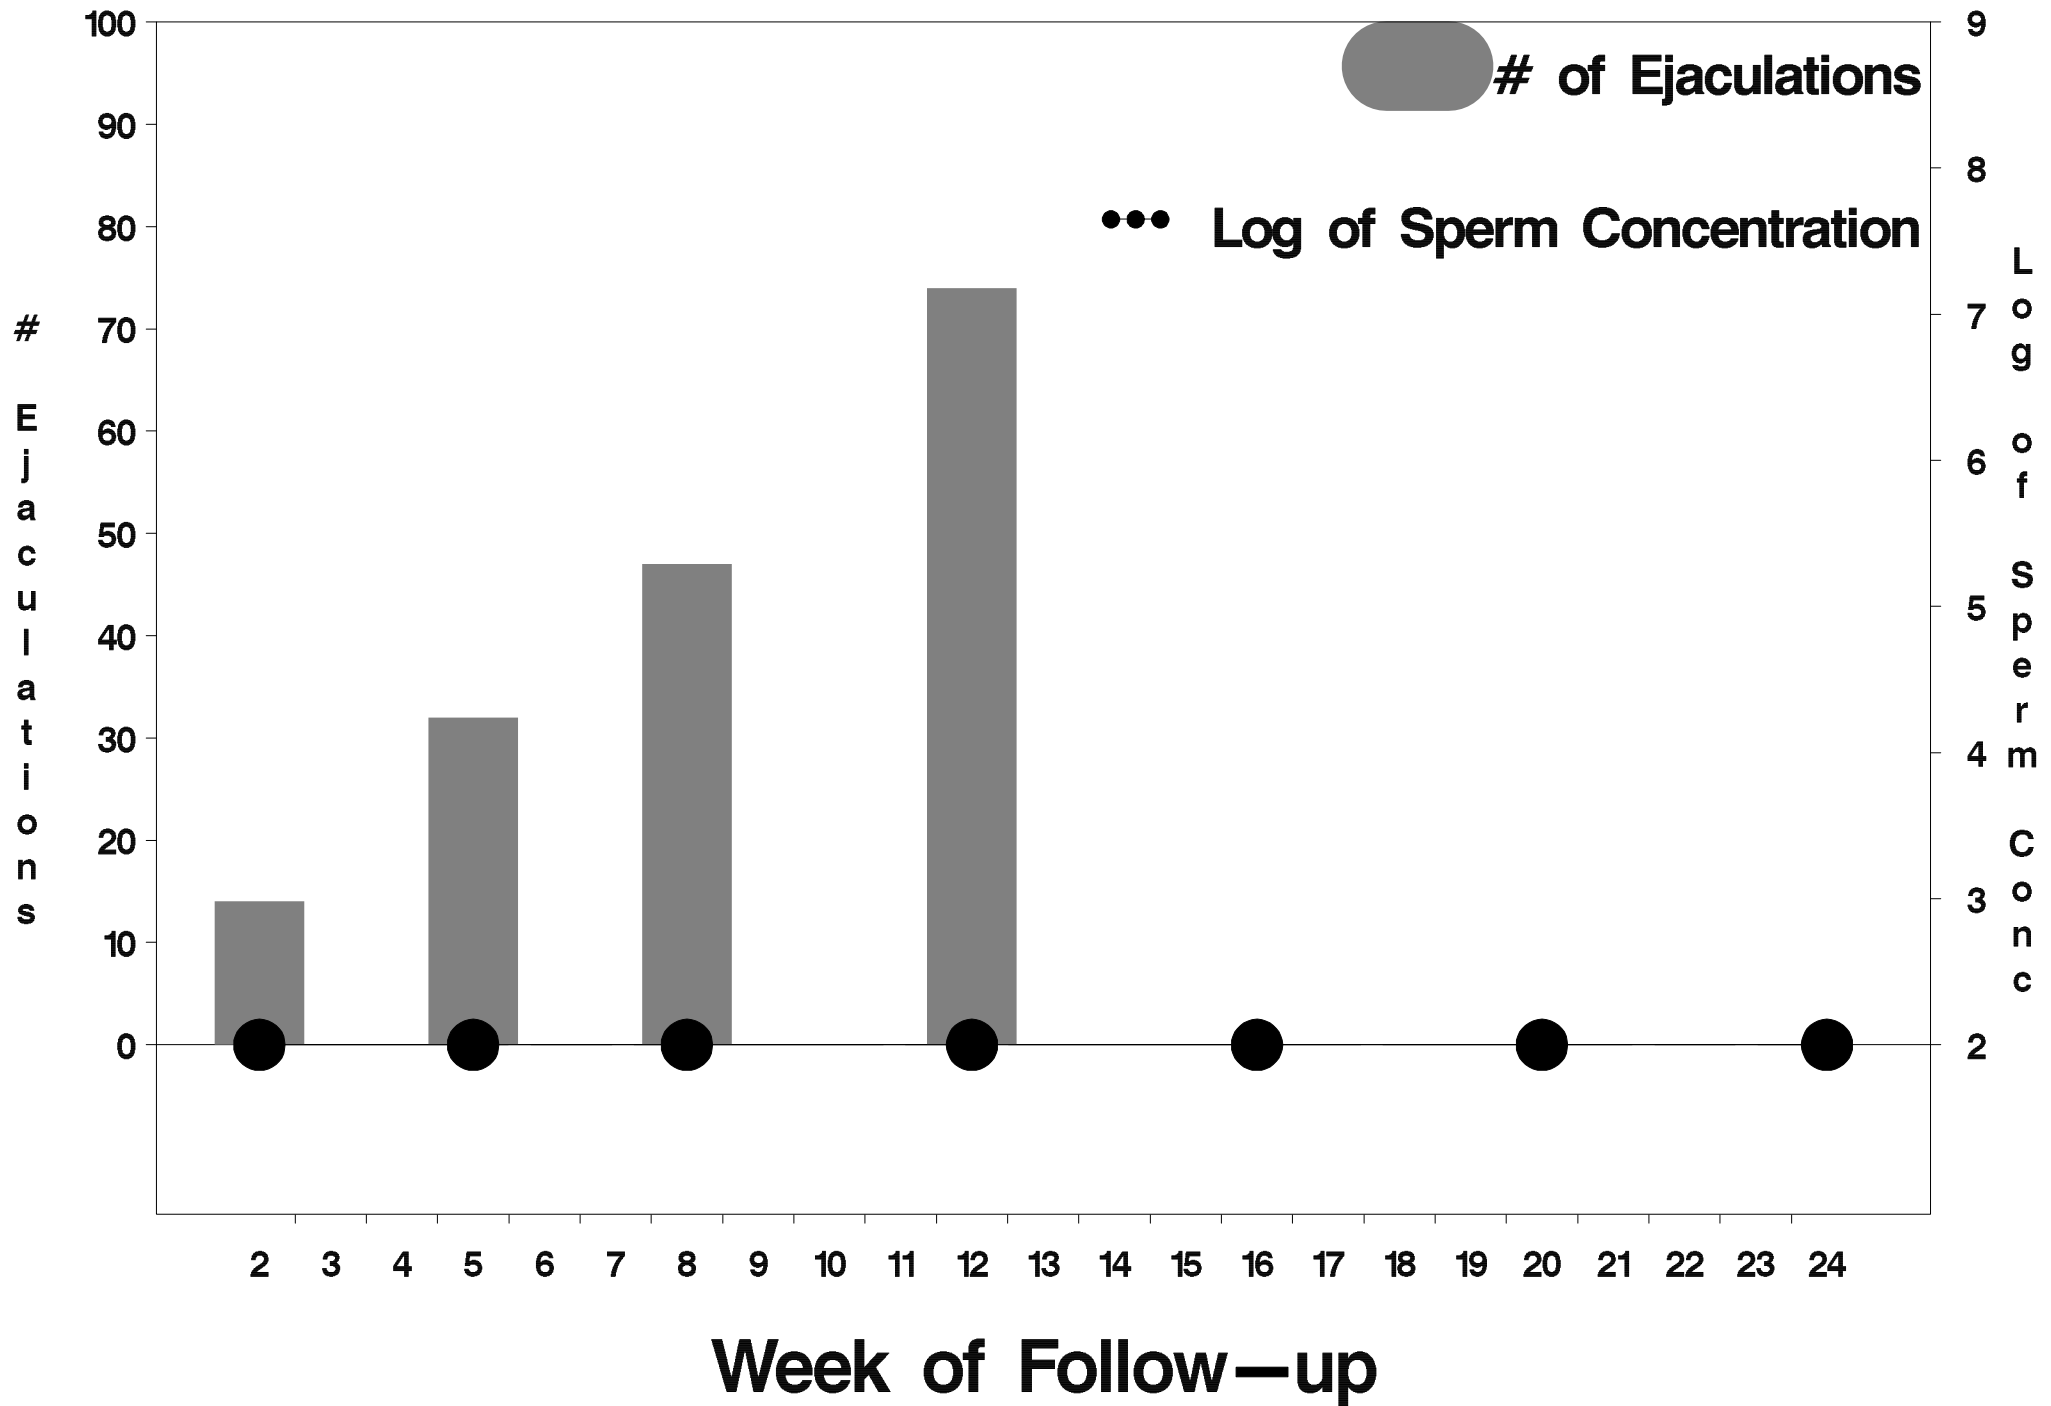



# Participant number= 705

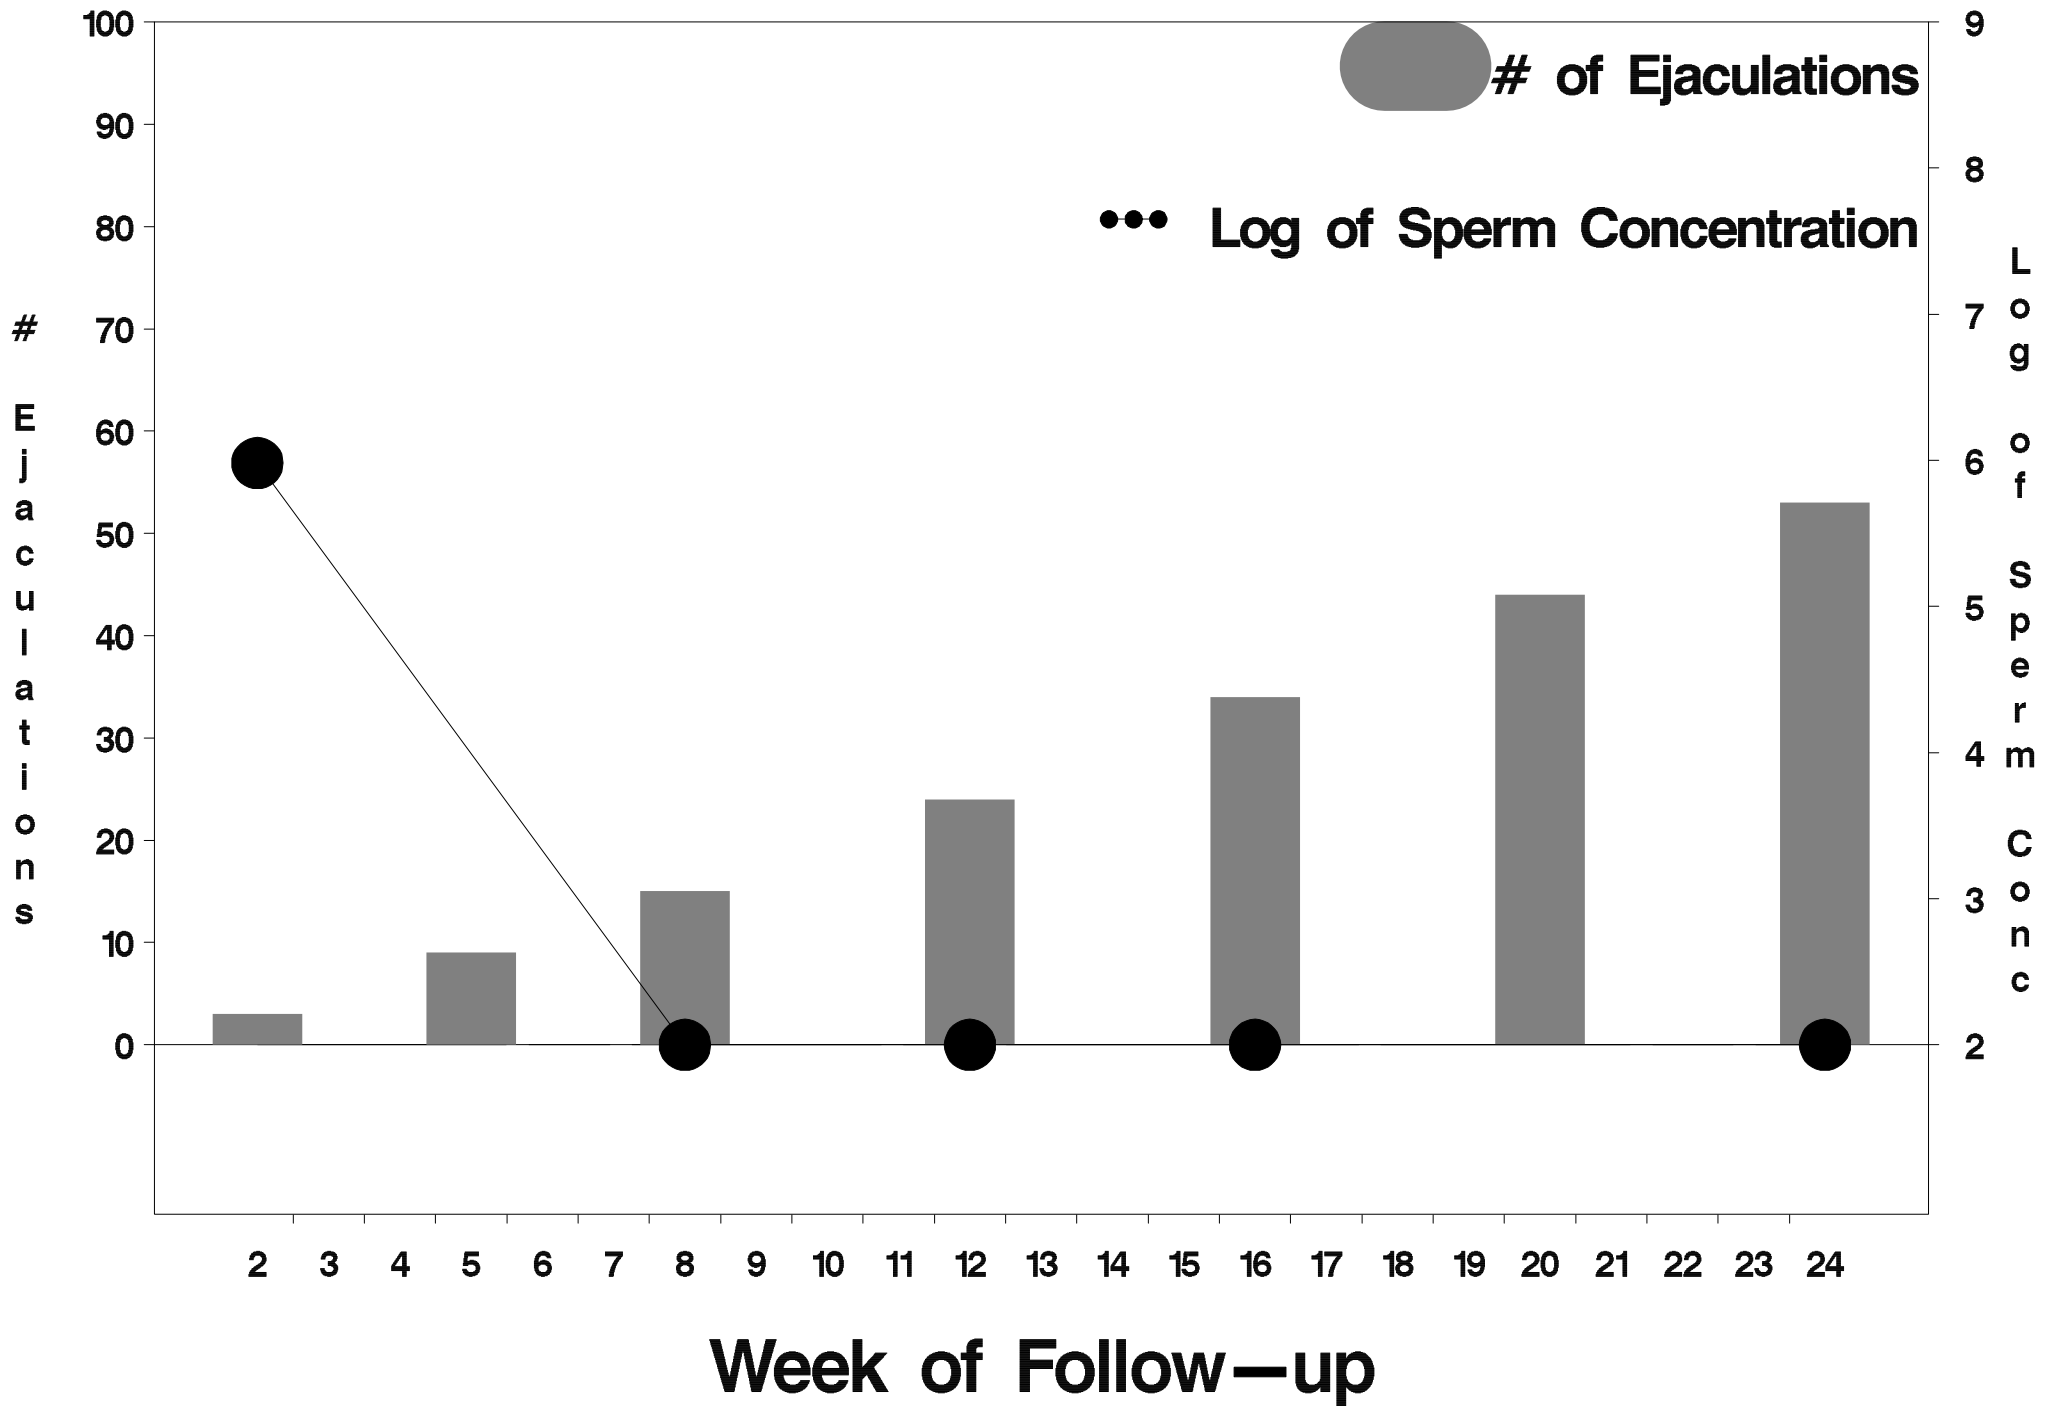

# Participant number= 706

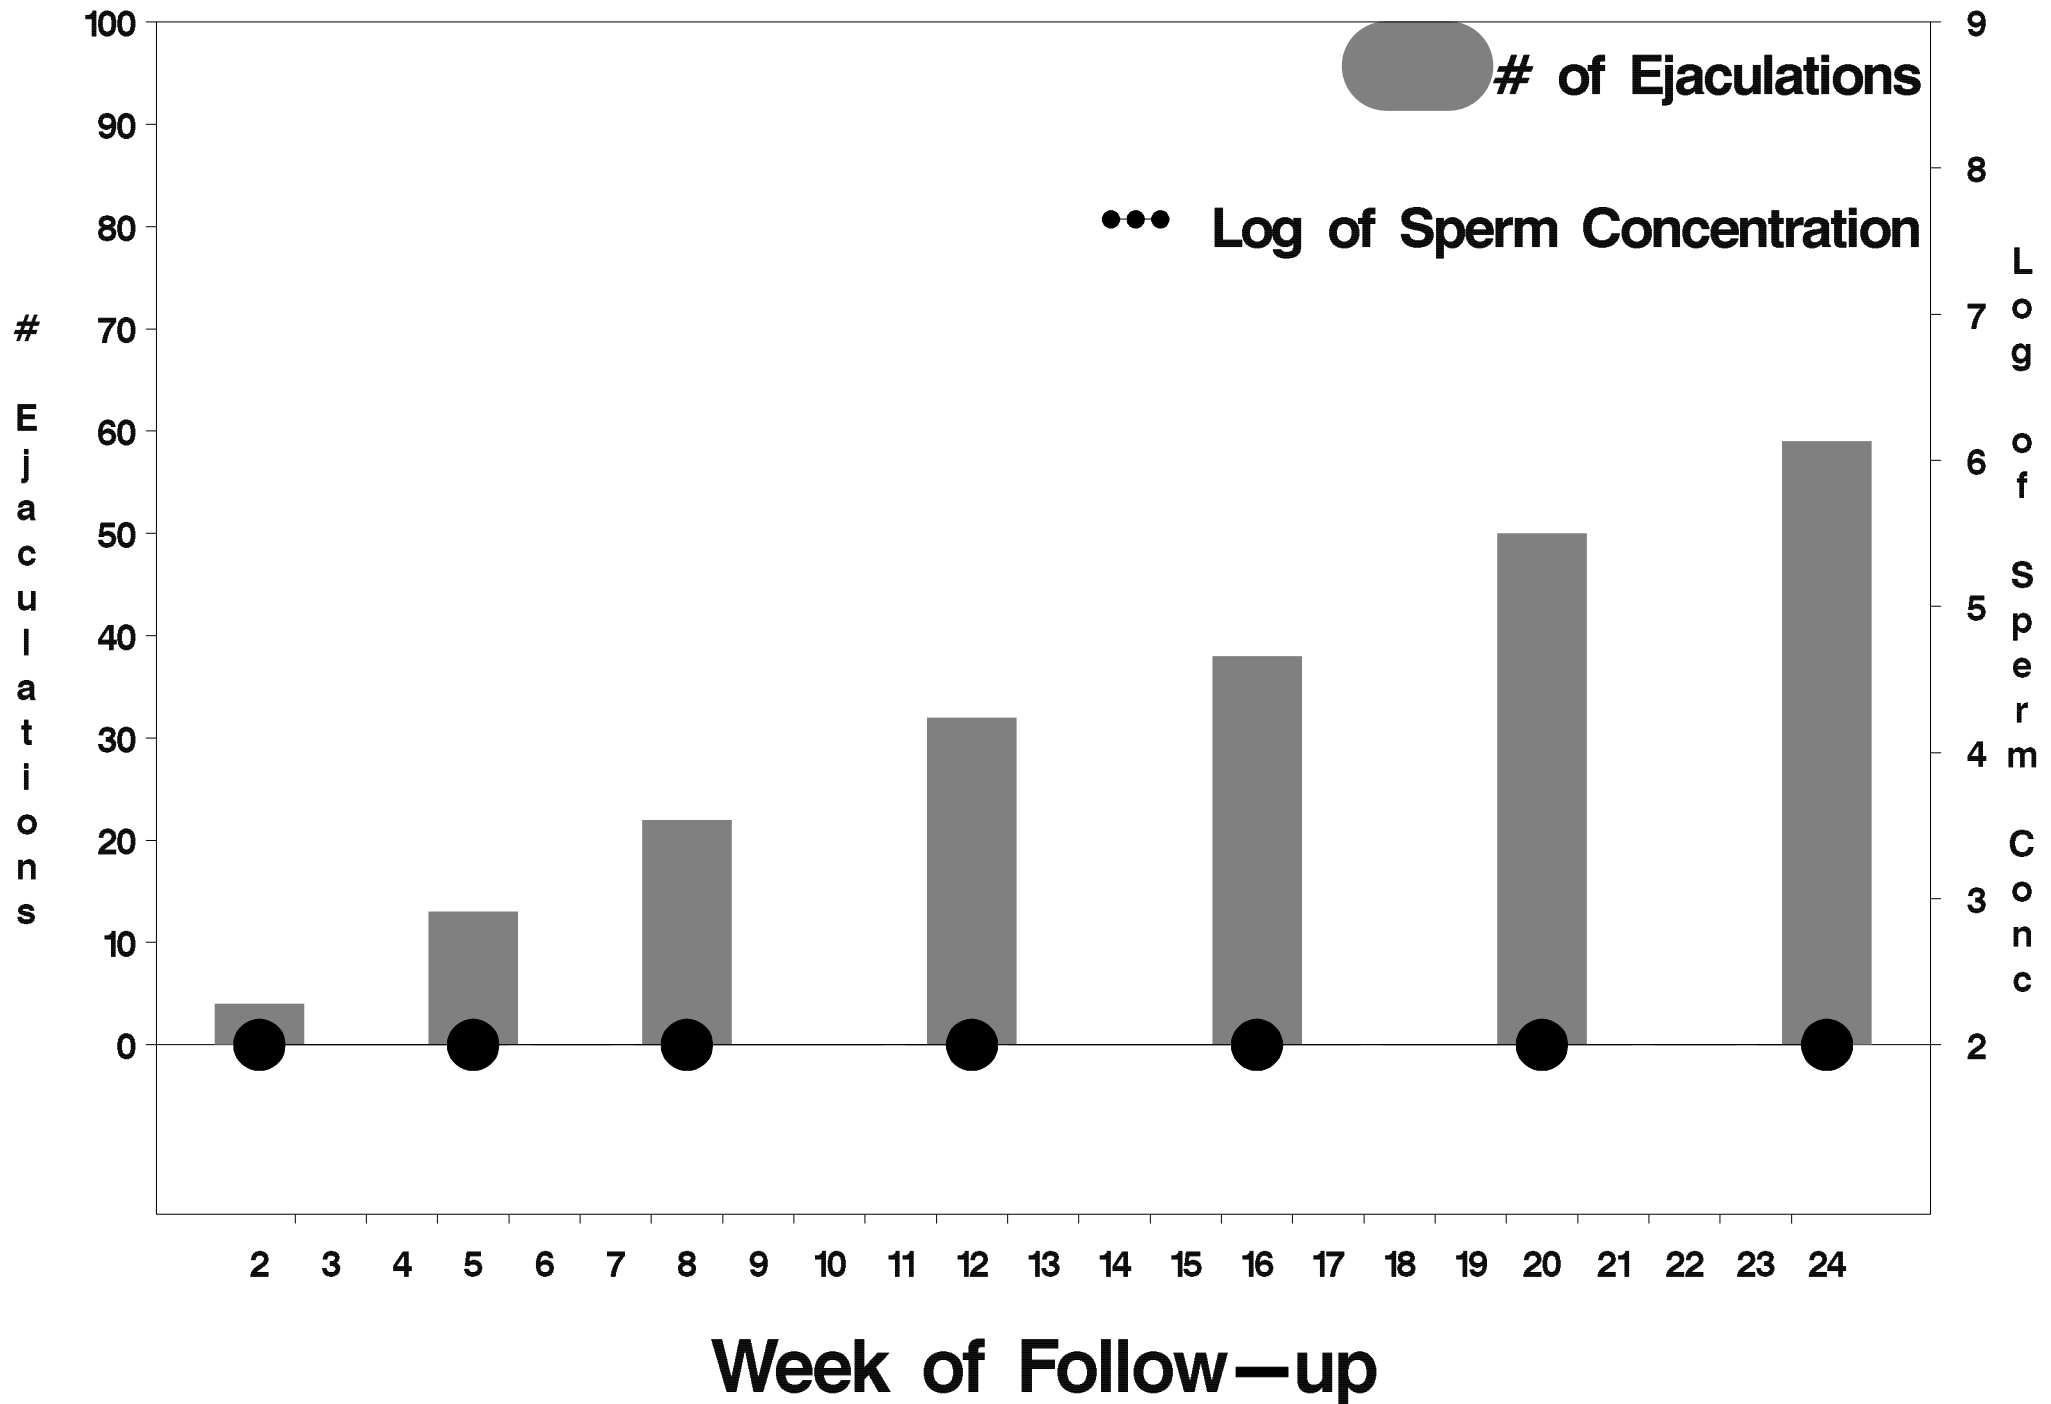

# Participant number= 707

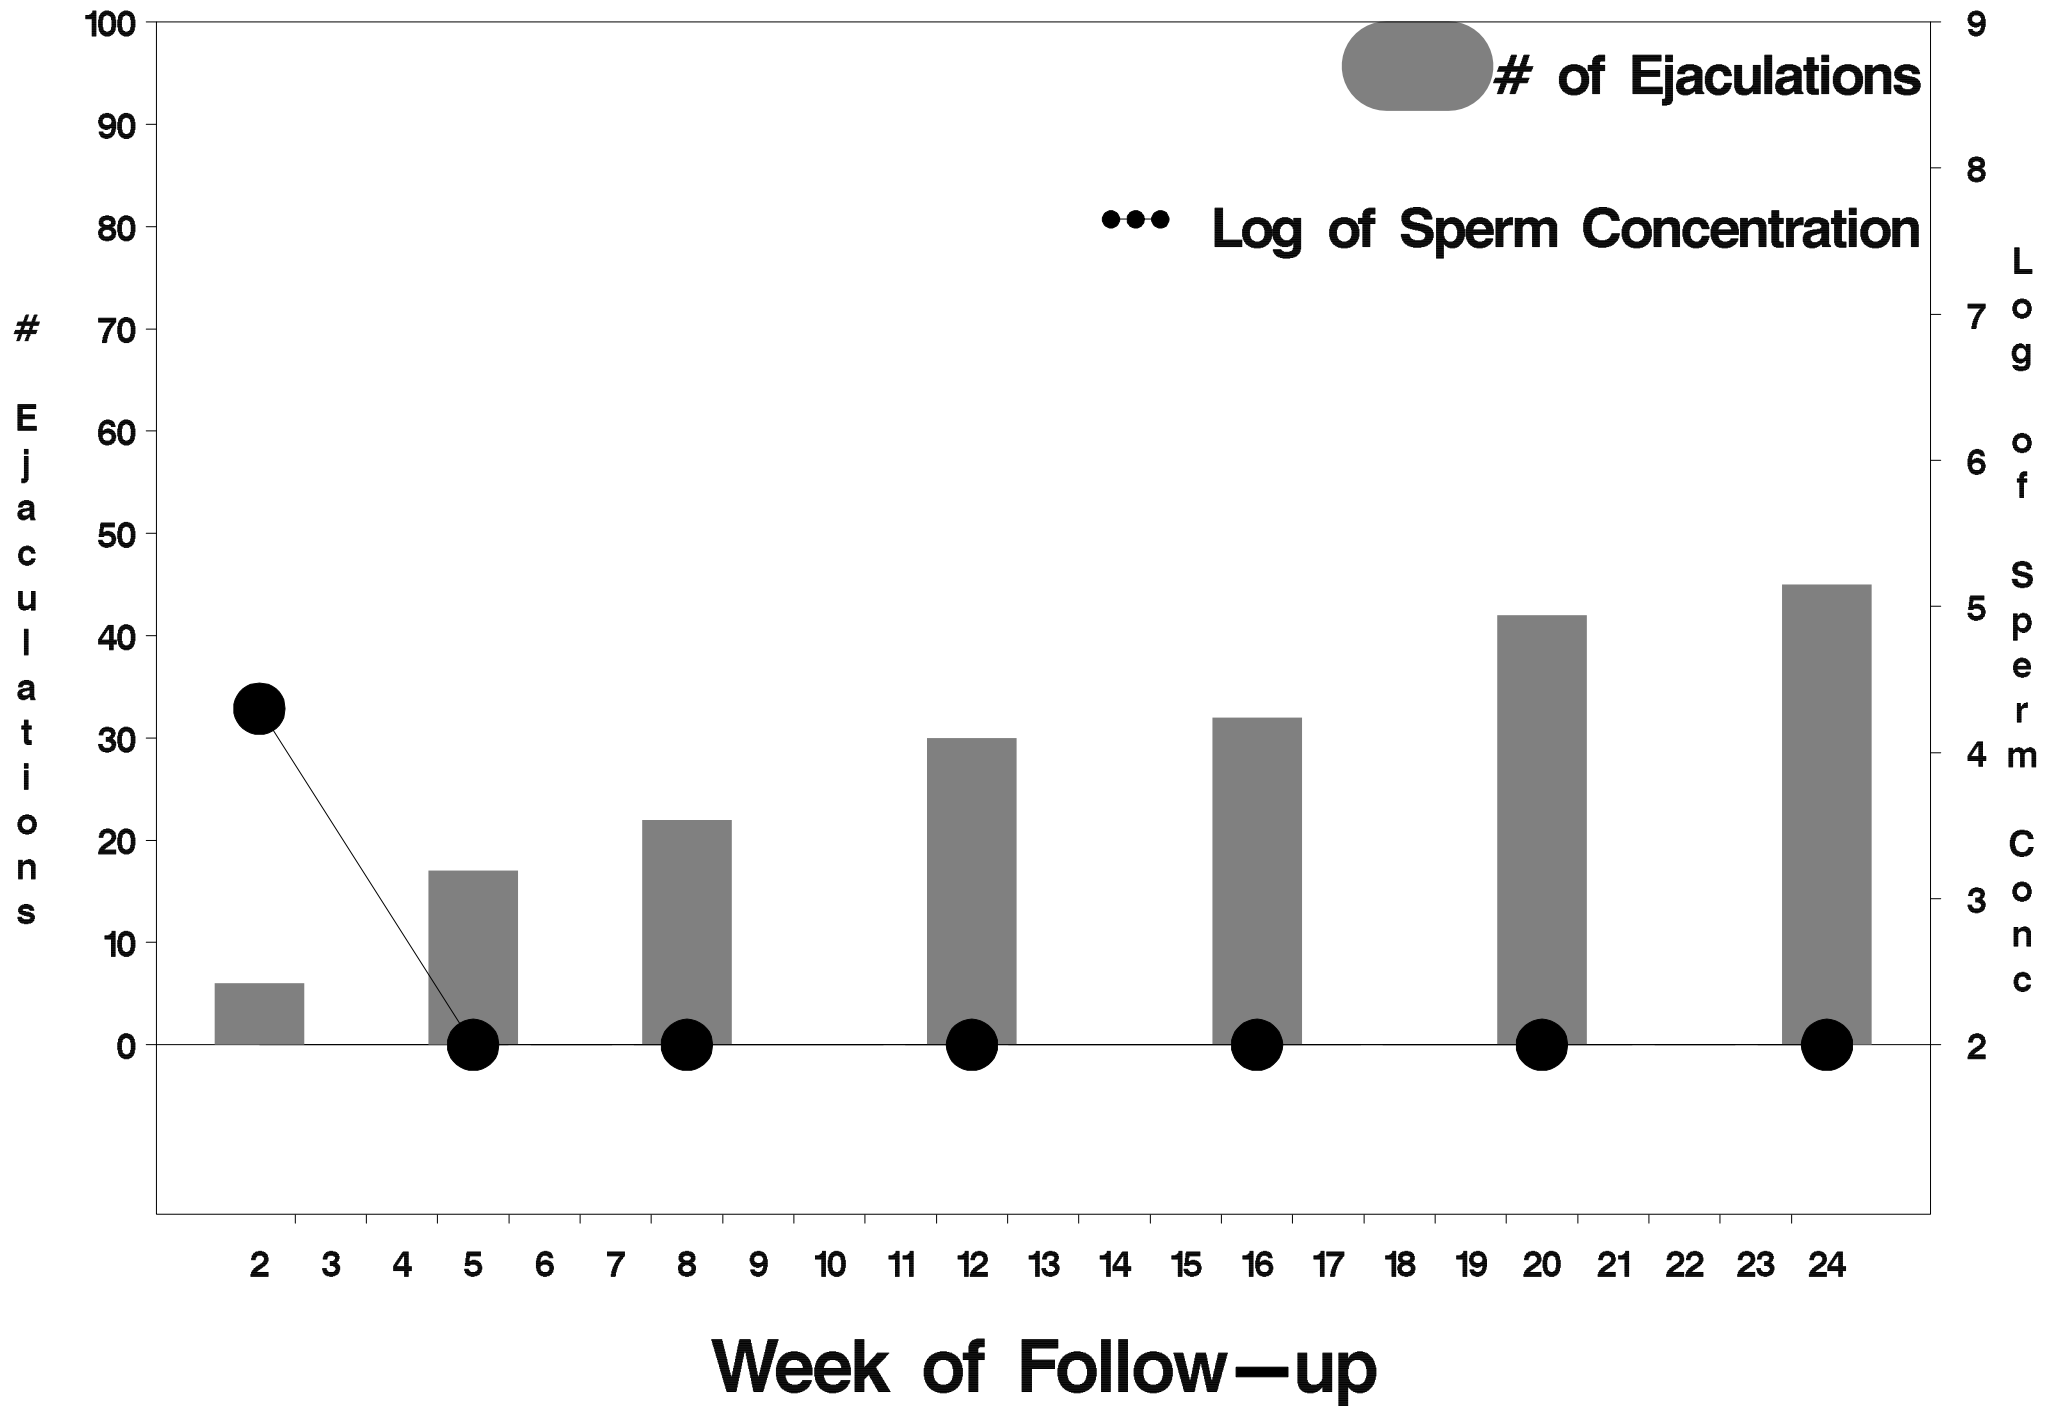

# Participant number= 708

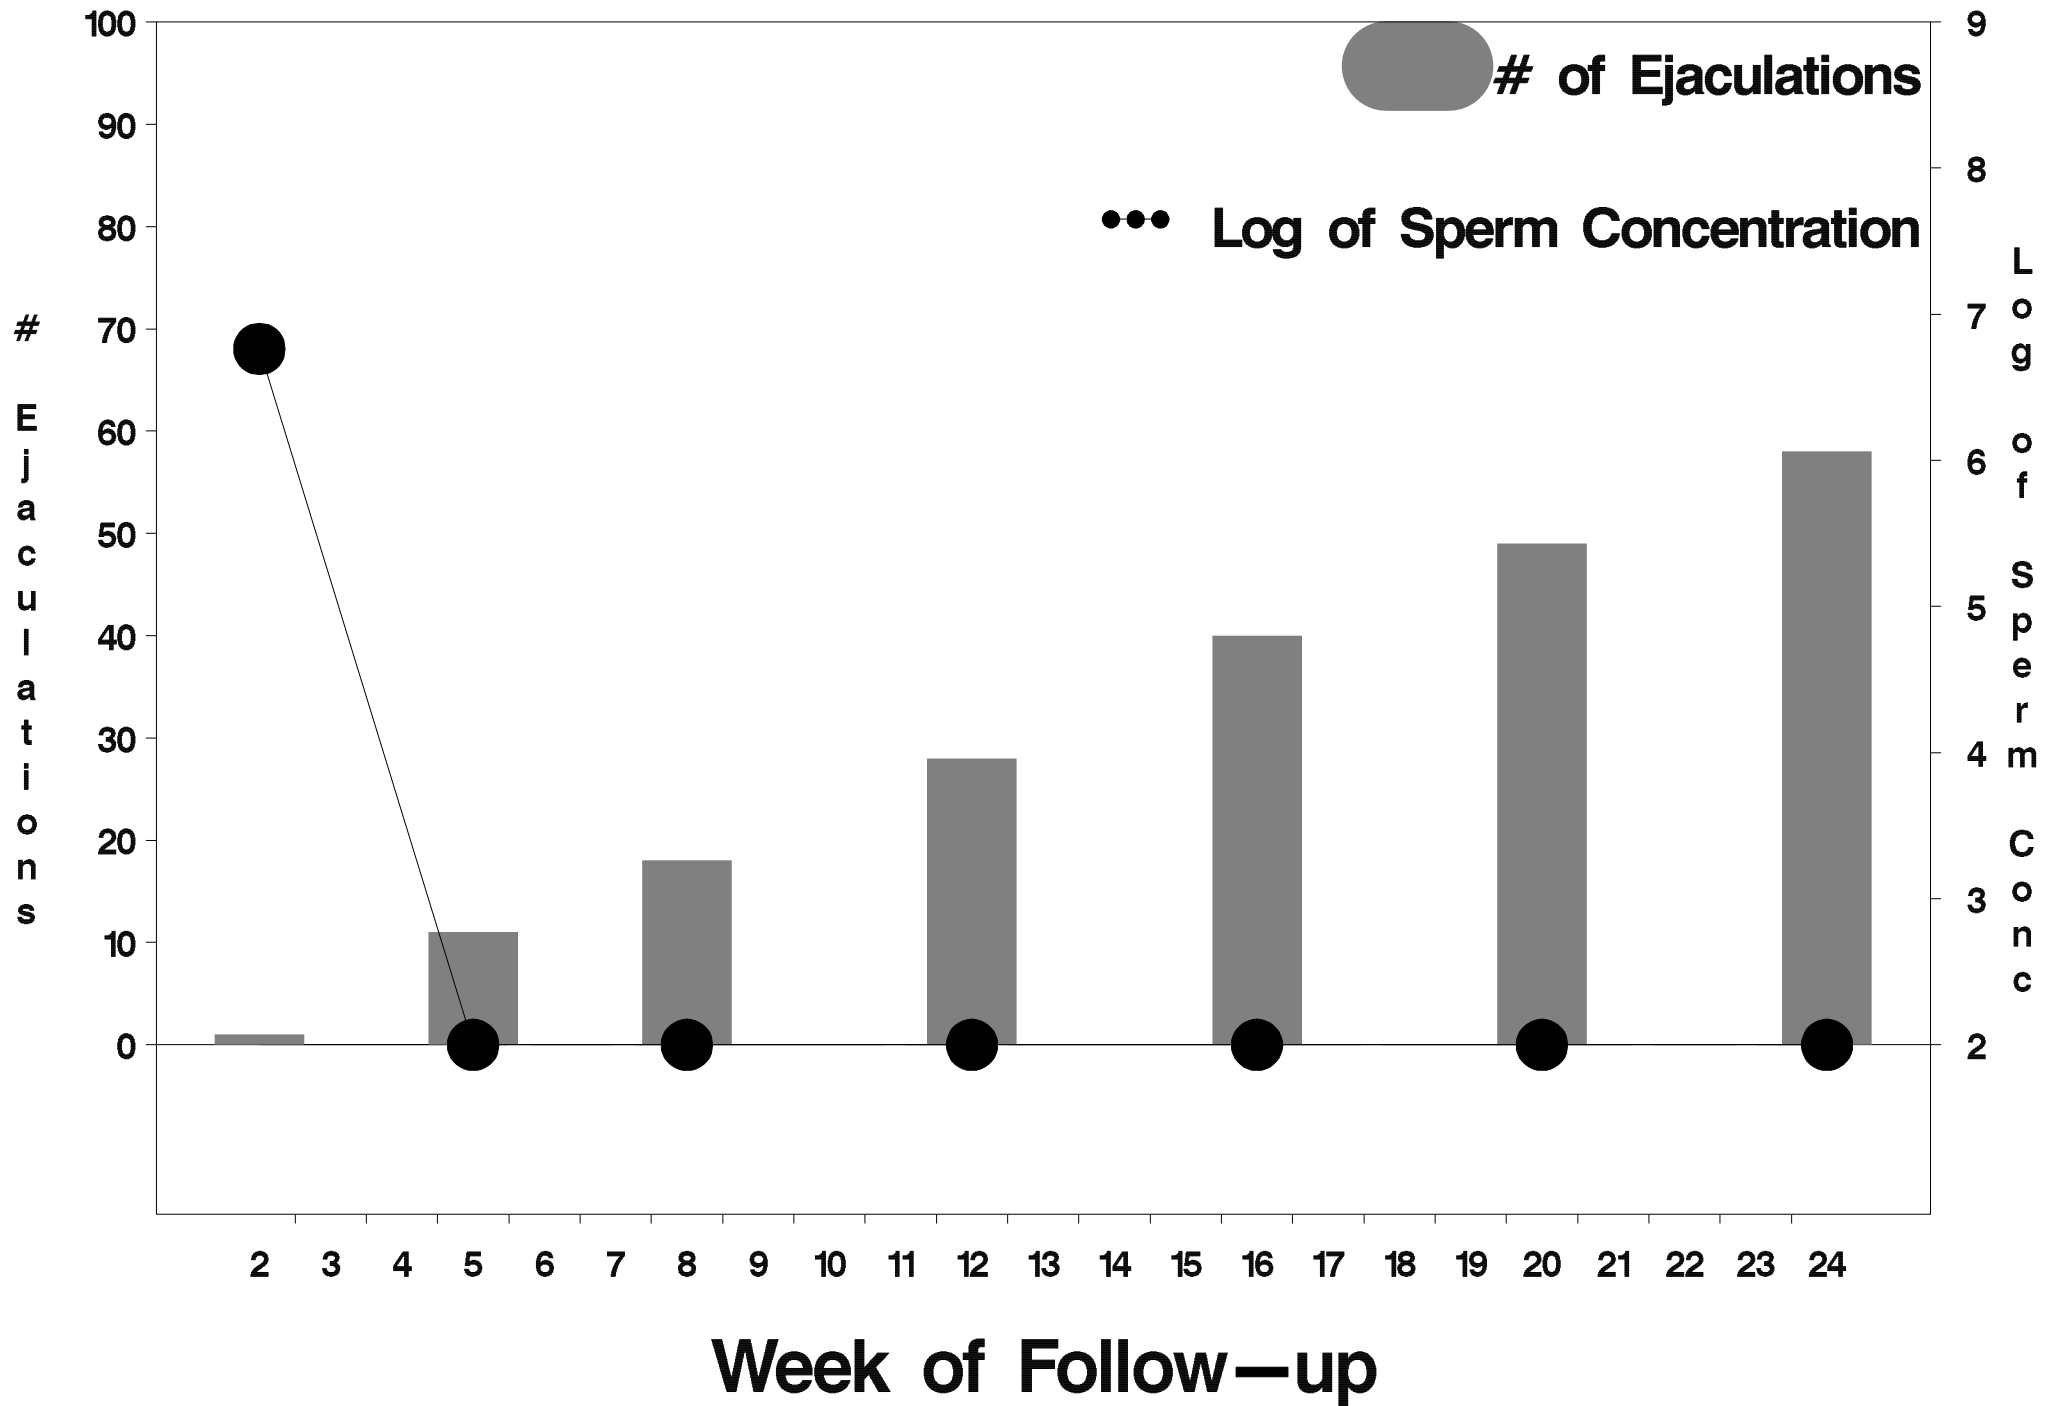

# Participant number= 709

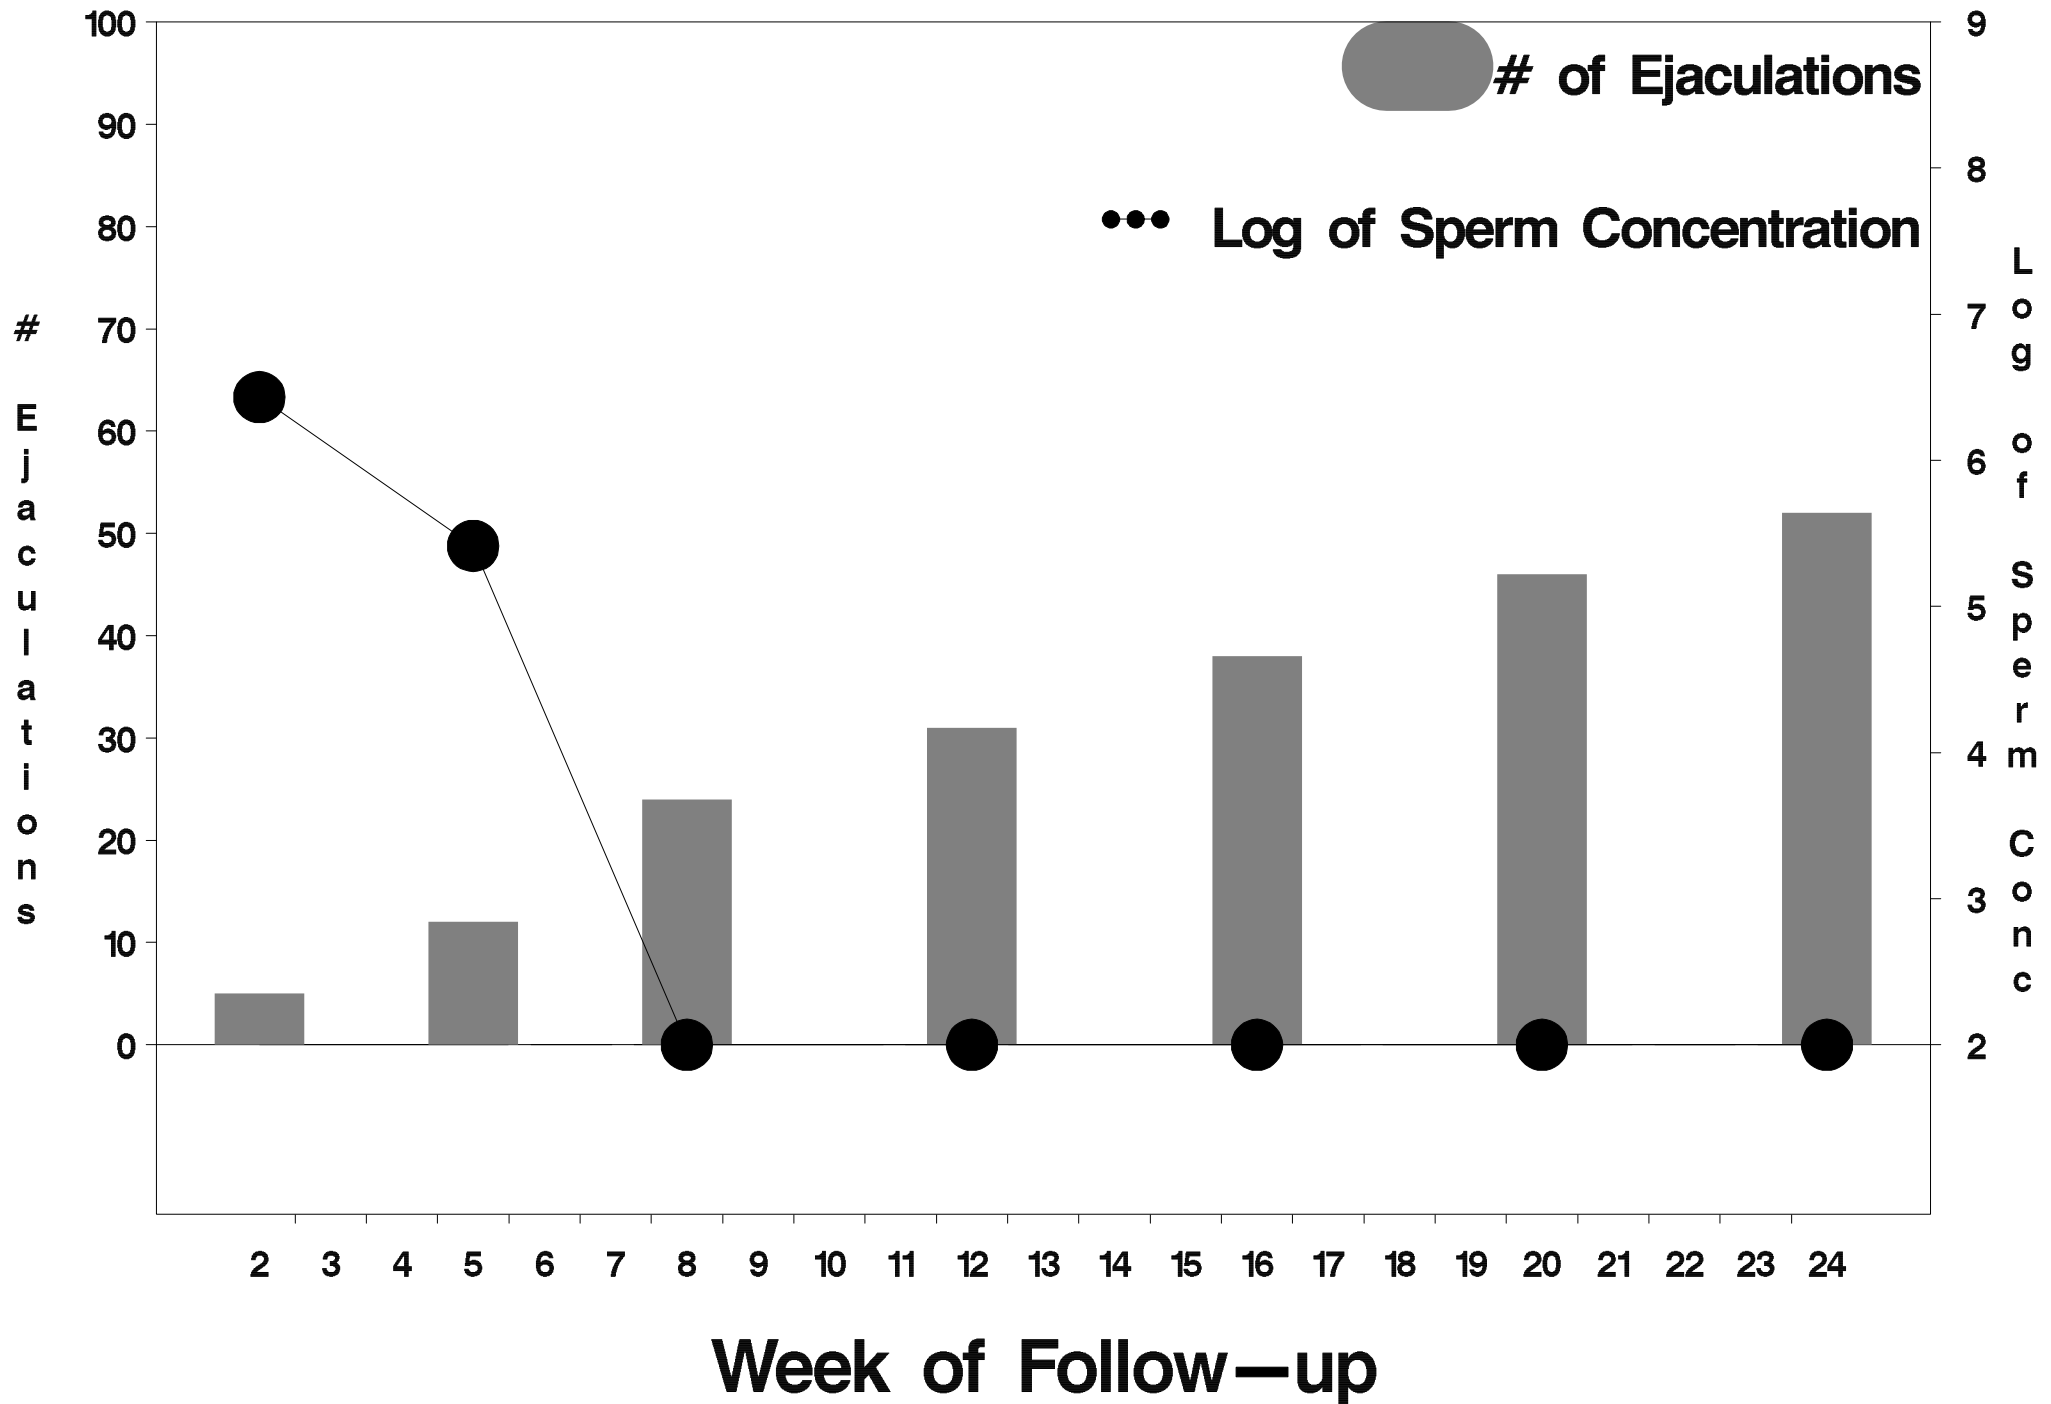

# Participant number= 710

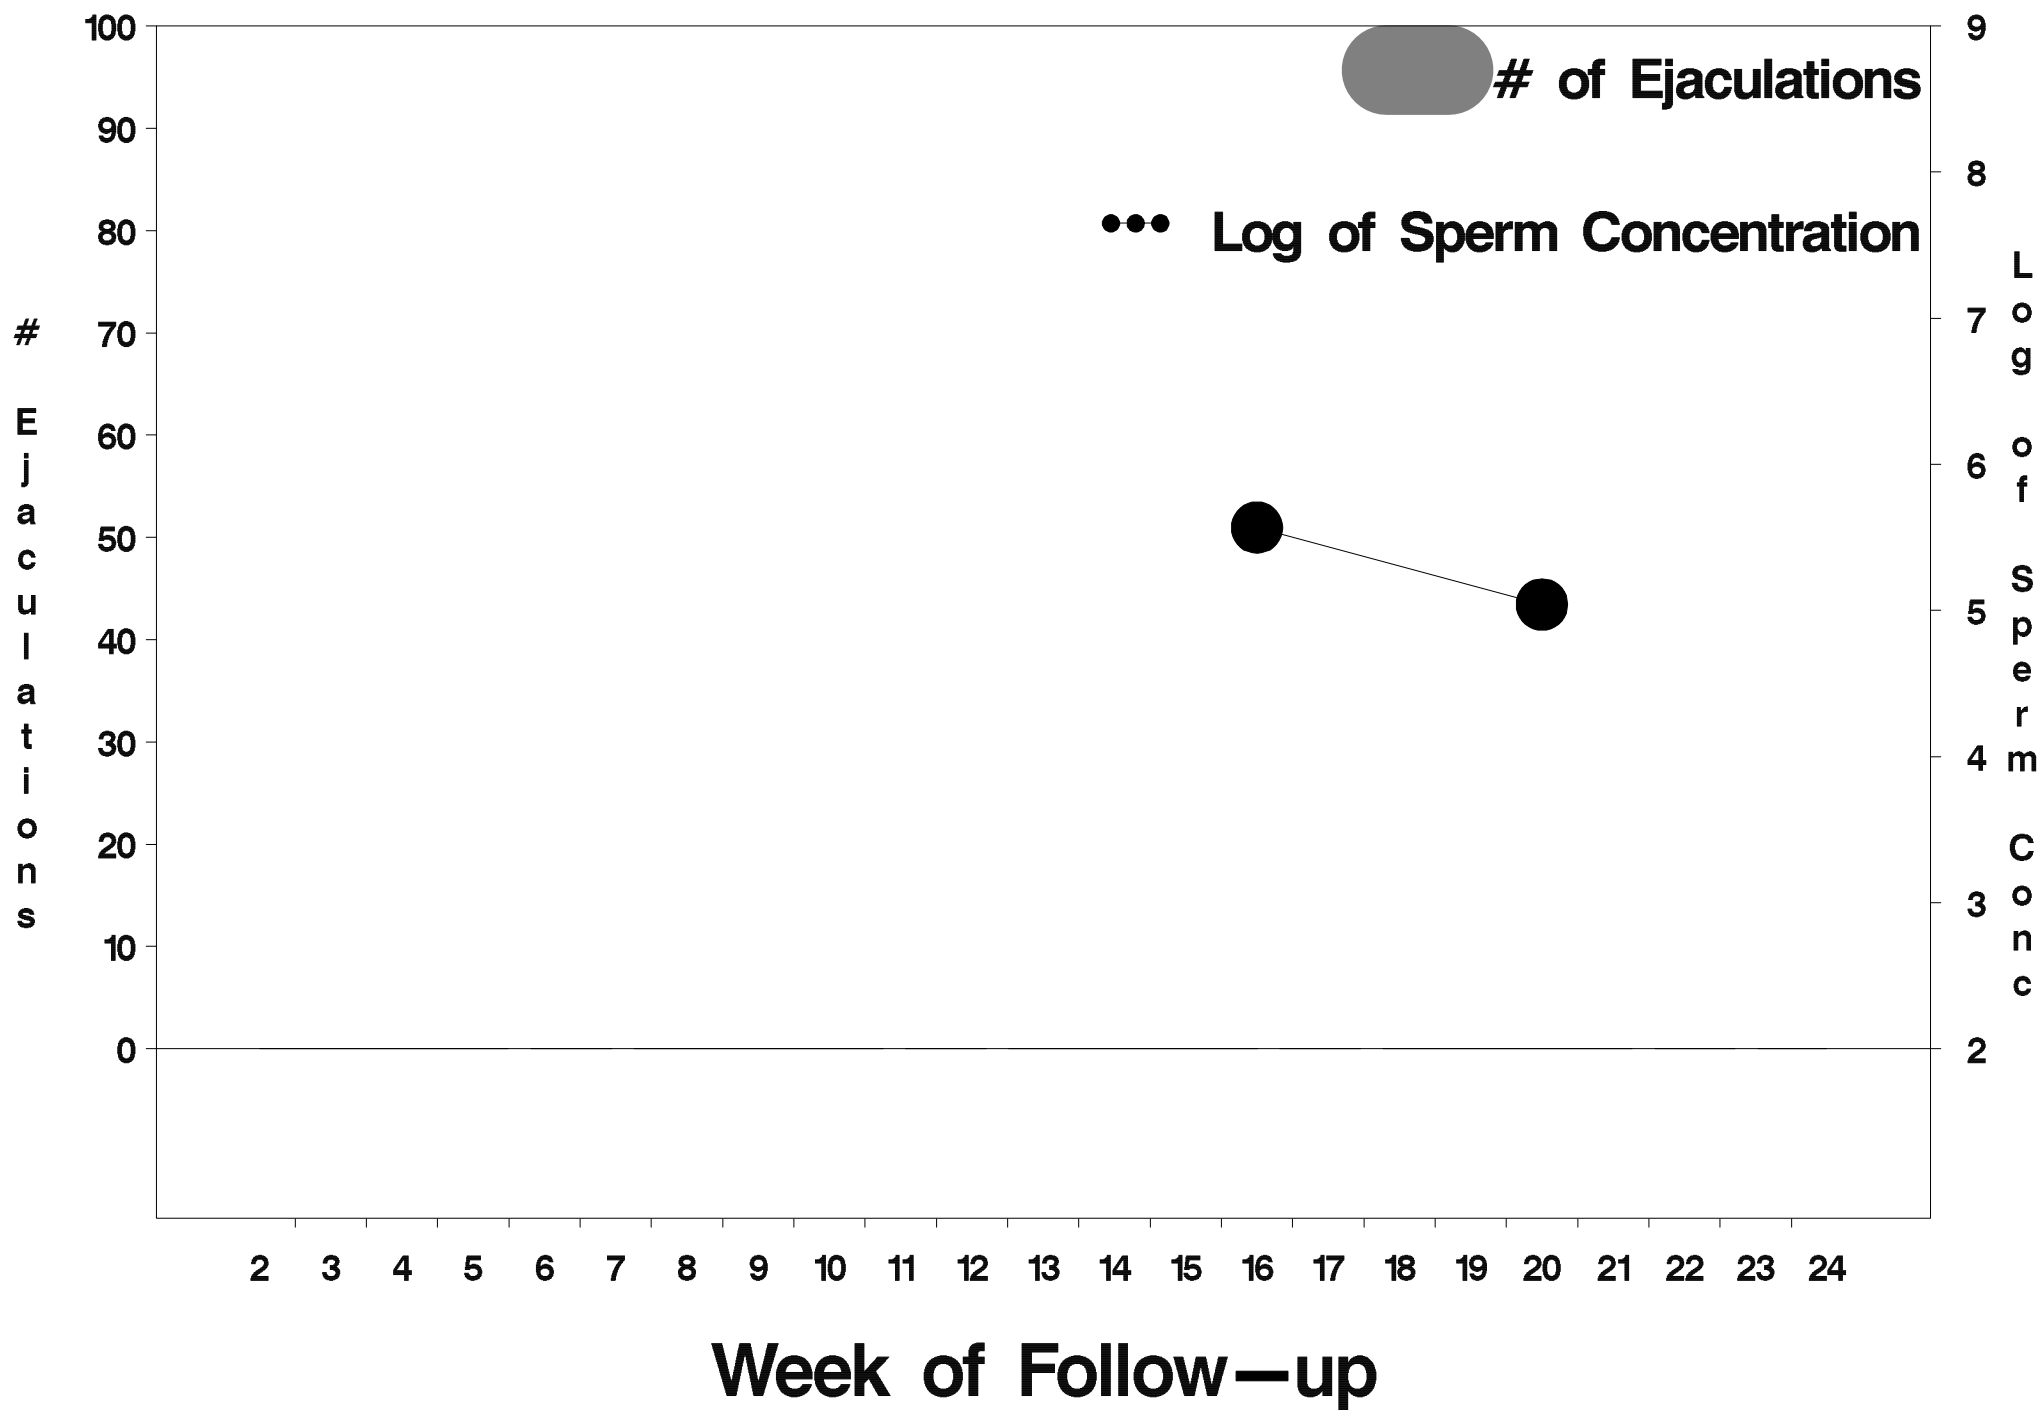

# Participant number= 711

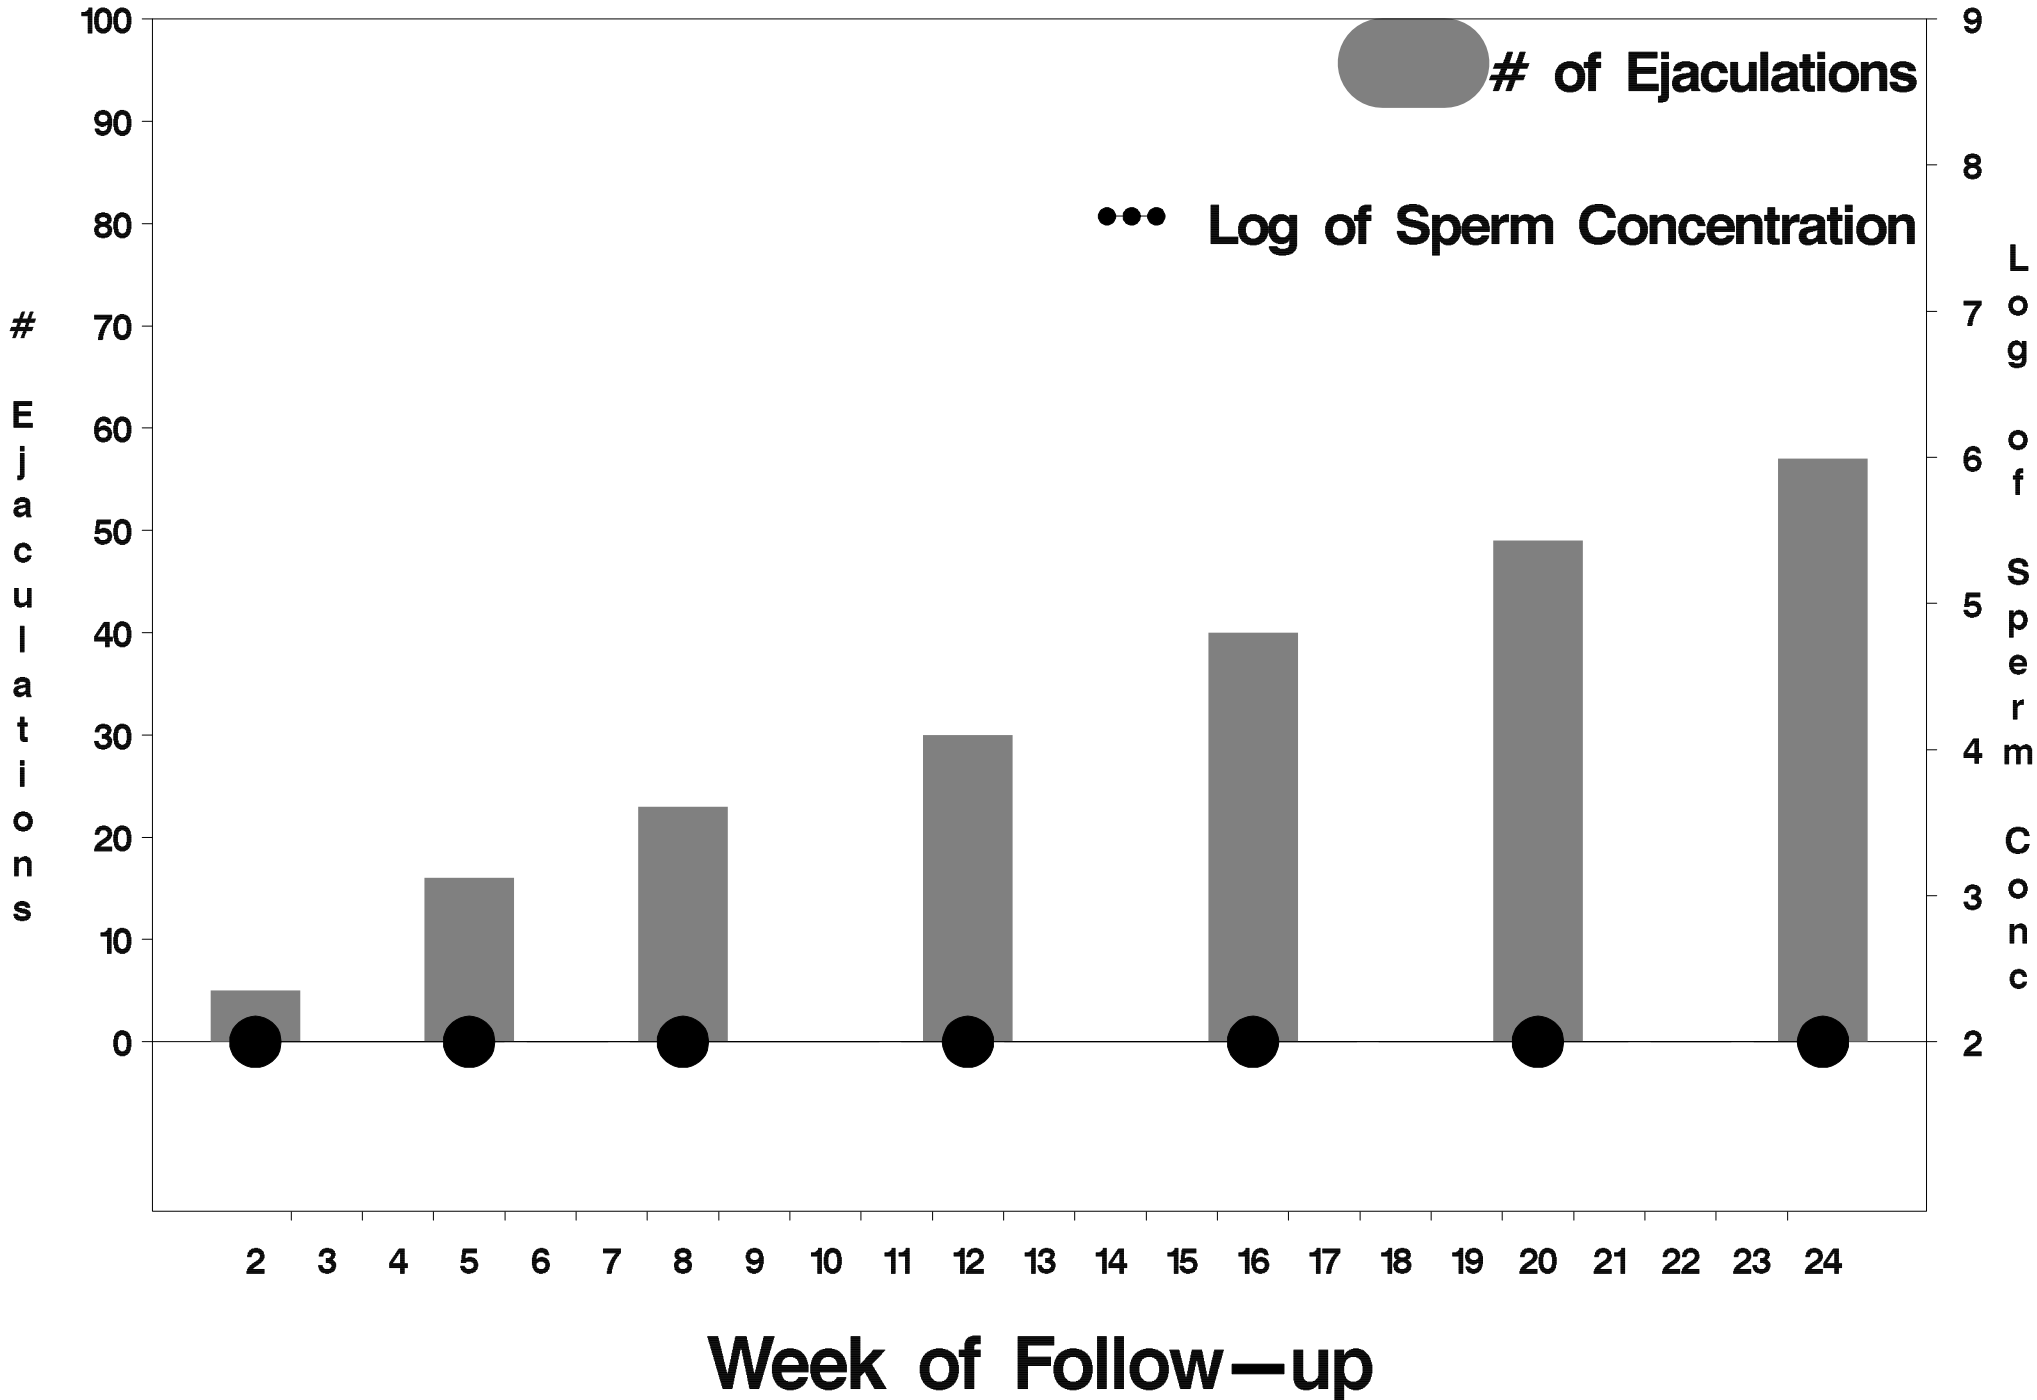

# Participant number= 712

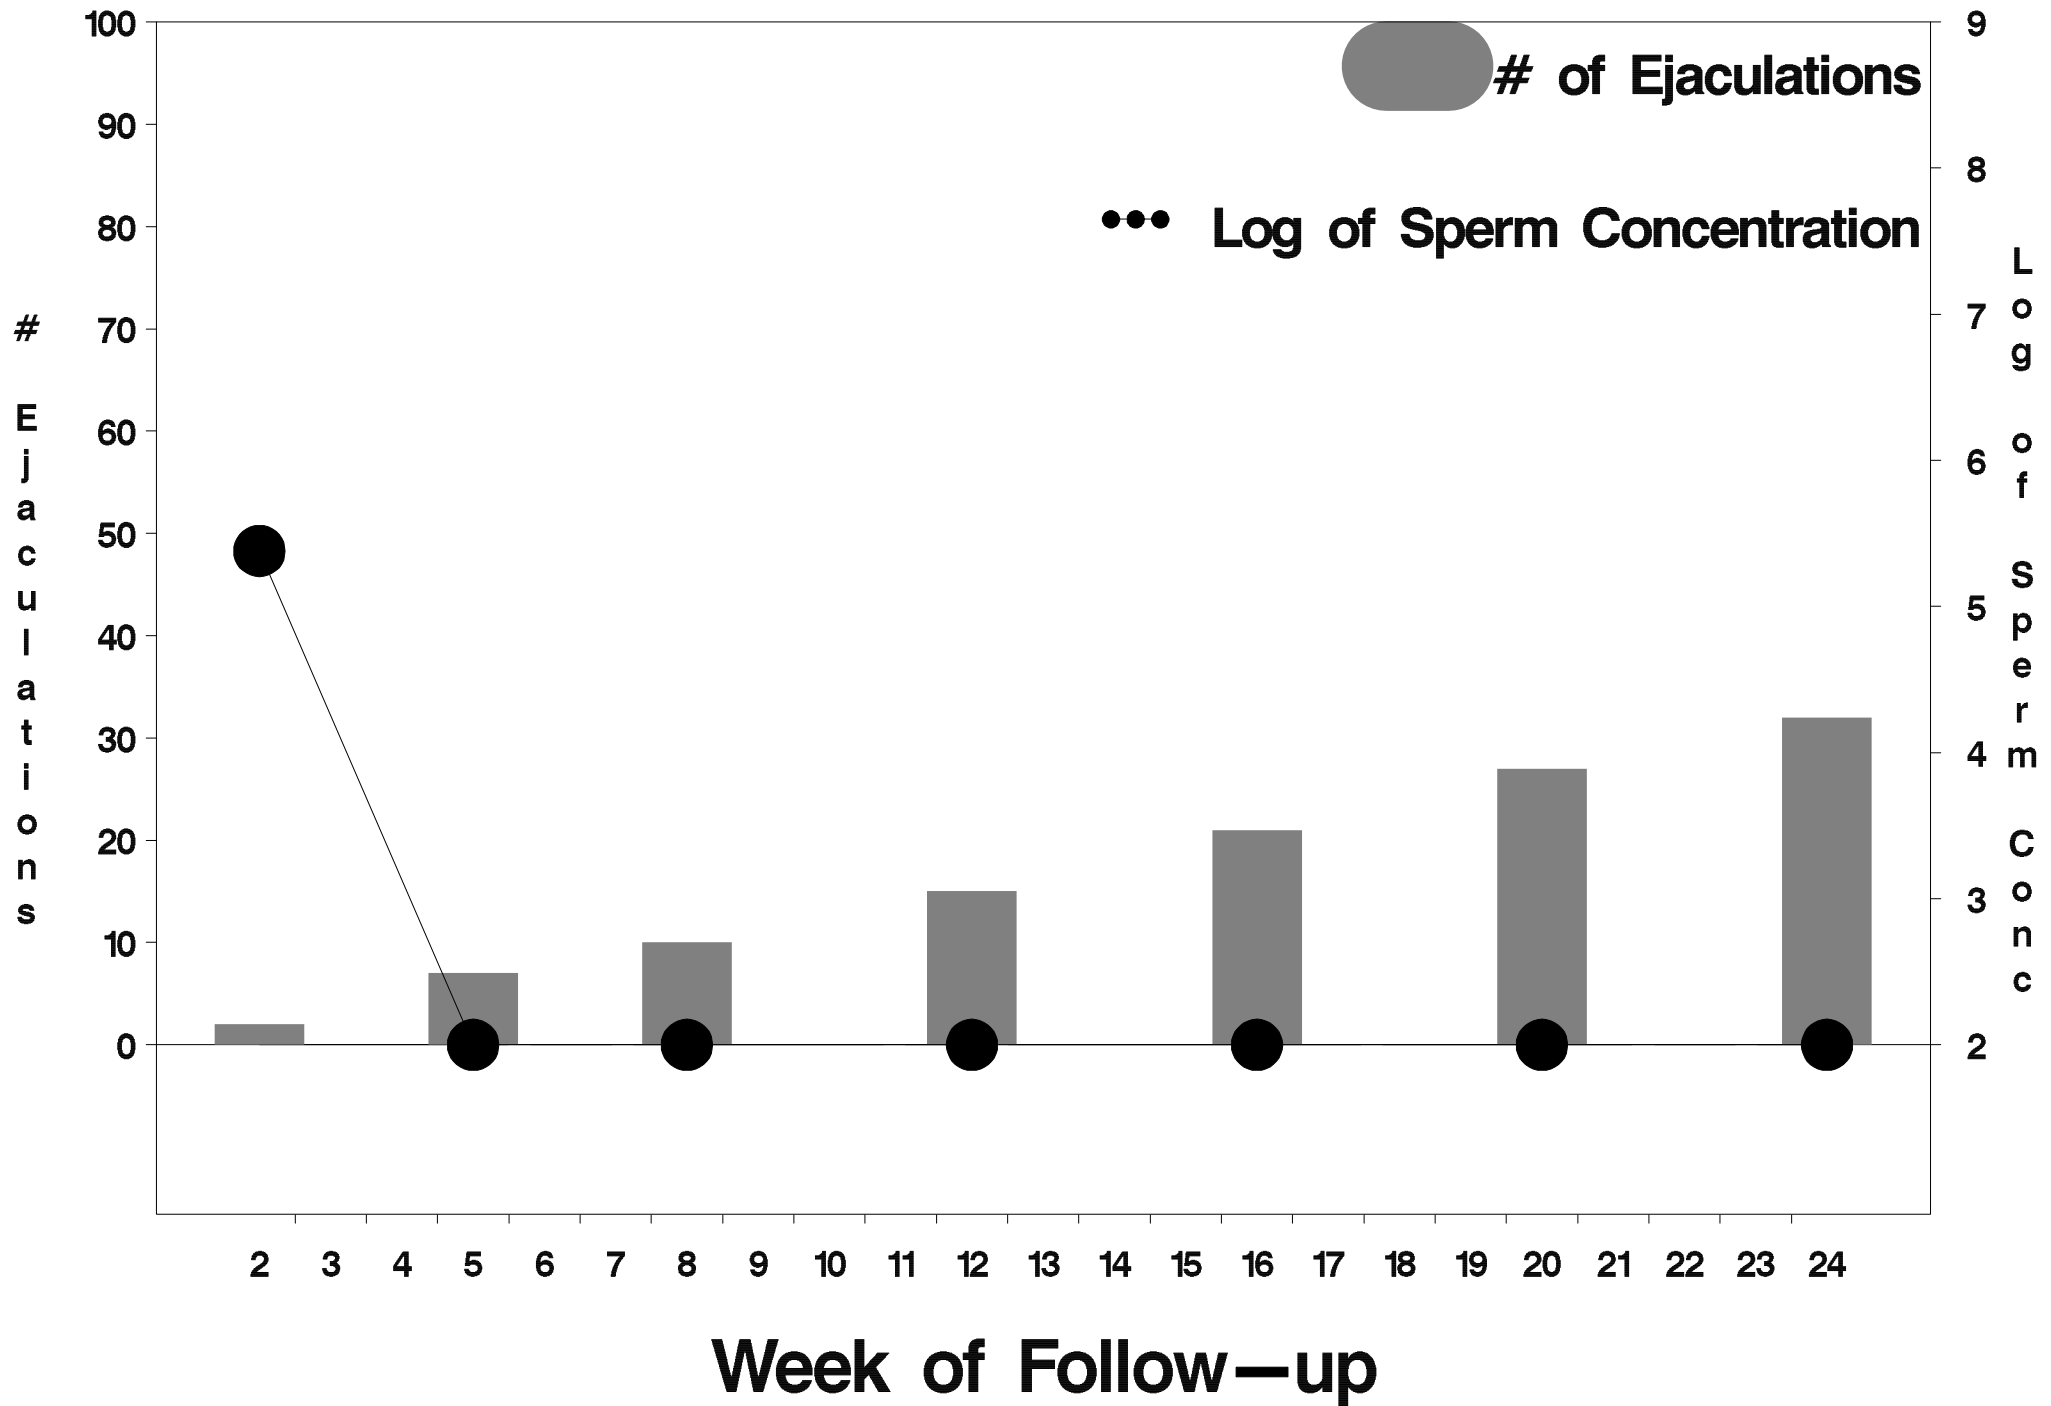



# Participant number= 713

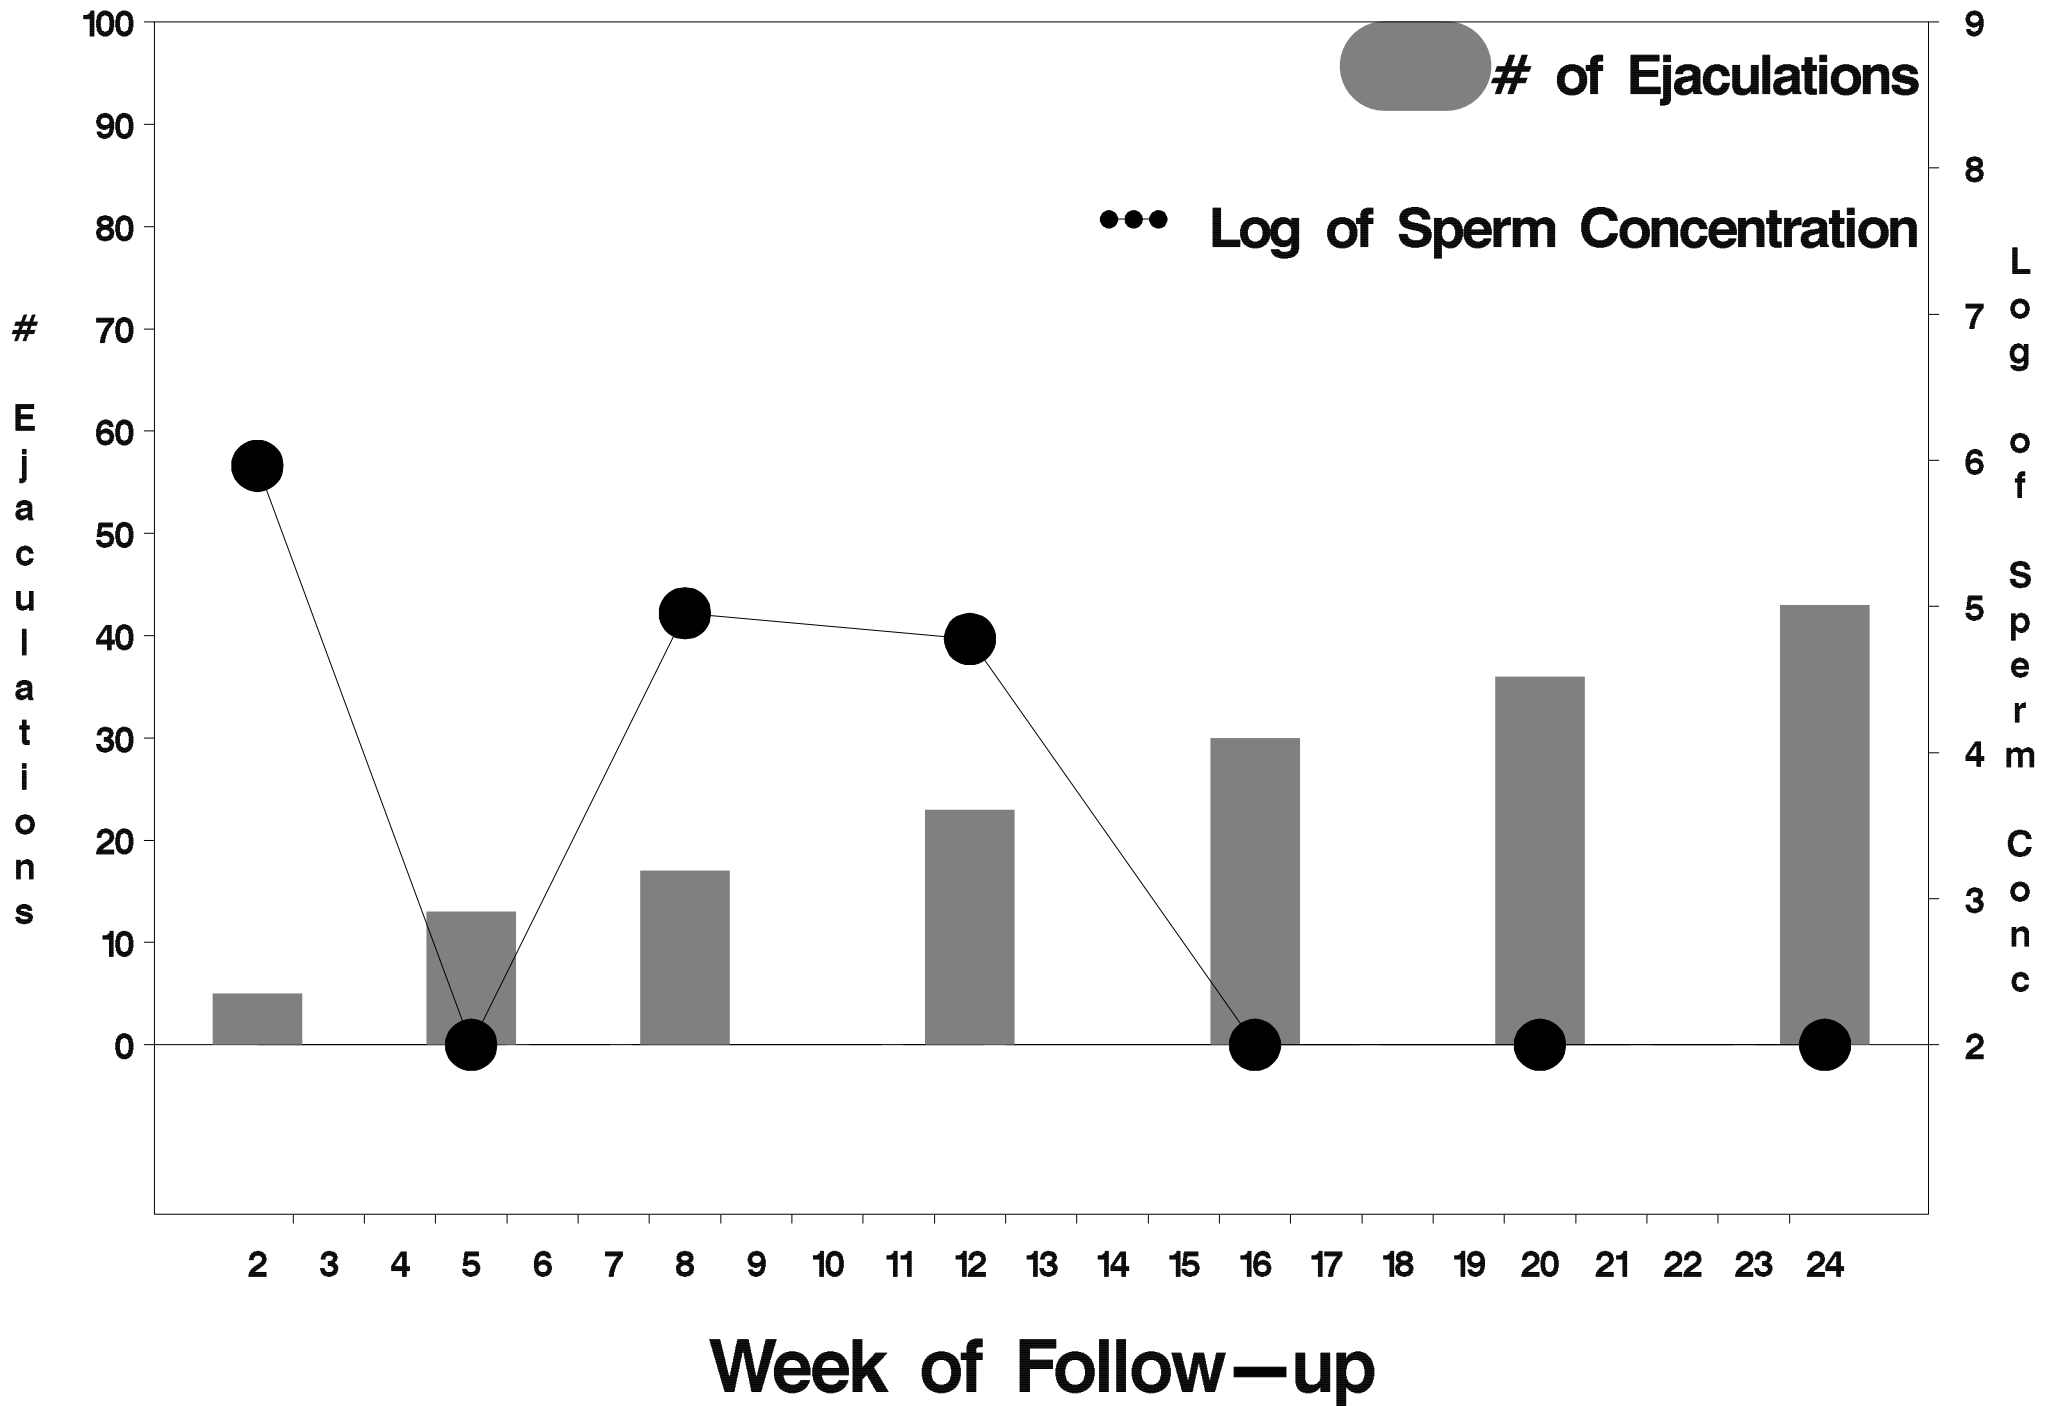

# Participant number= 714

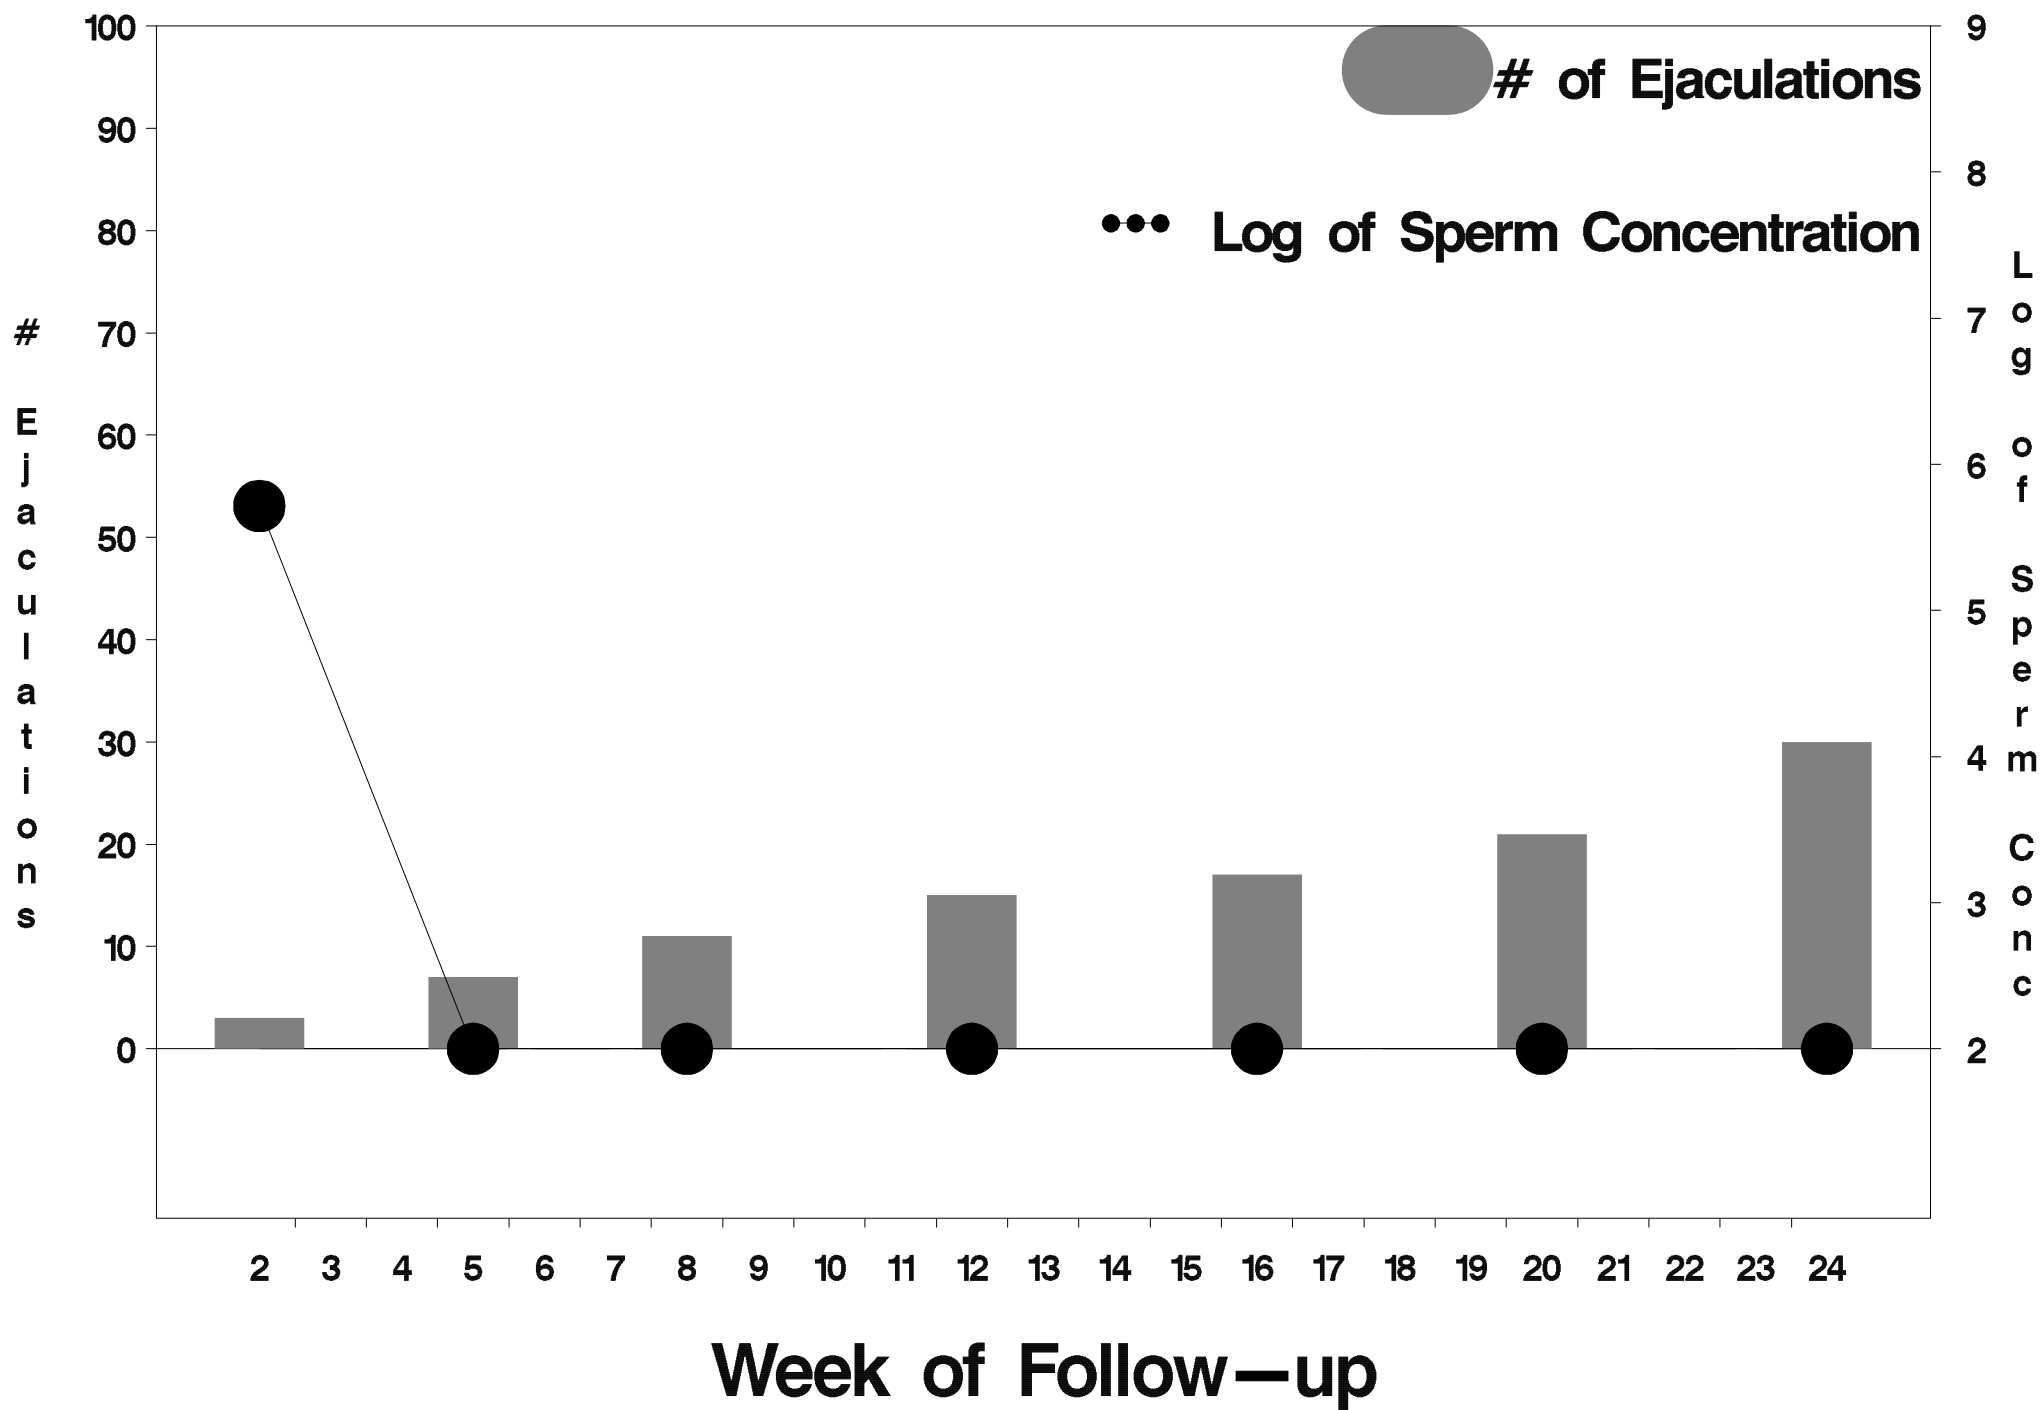



# Participant number= 716

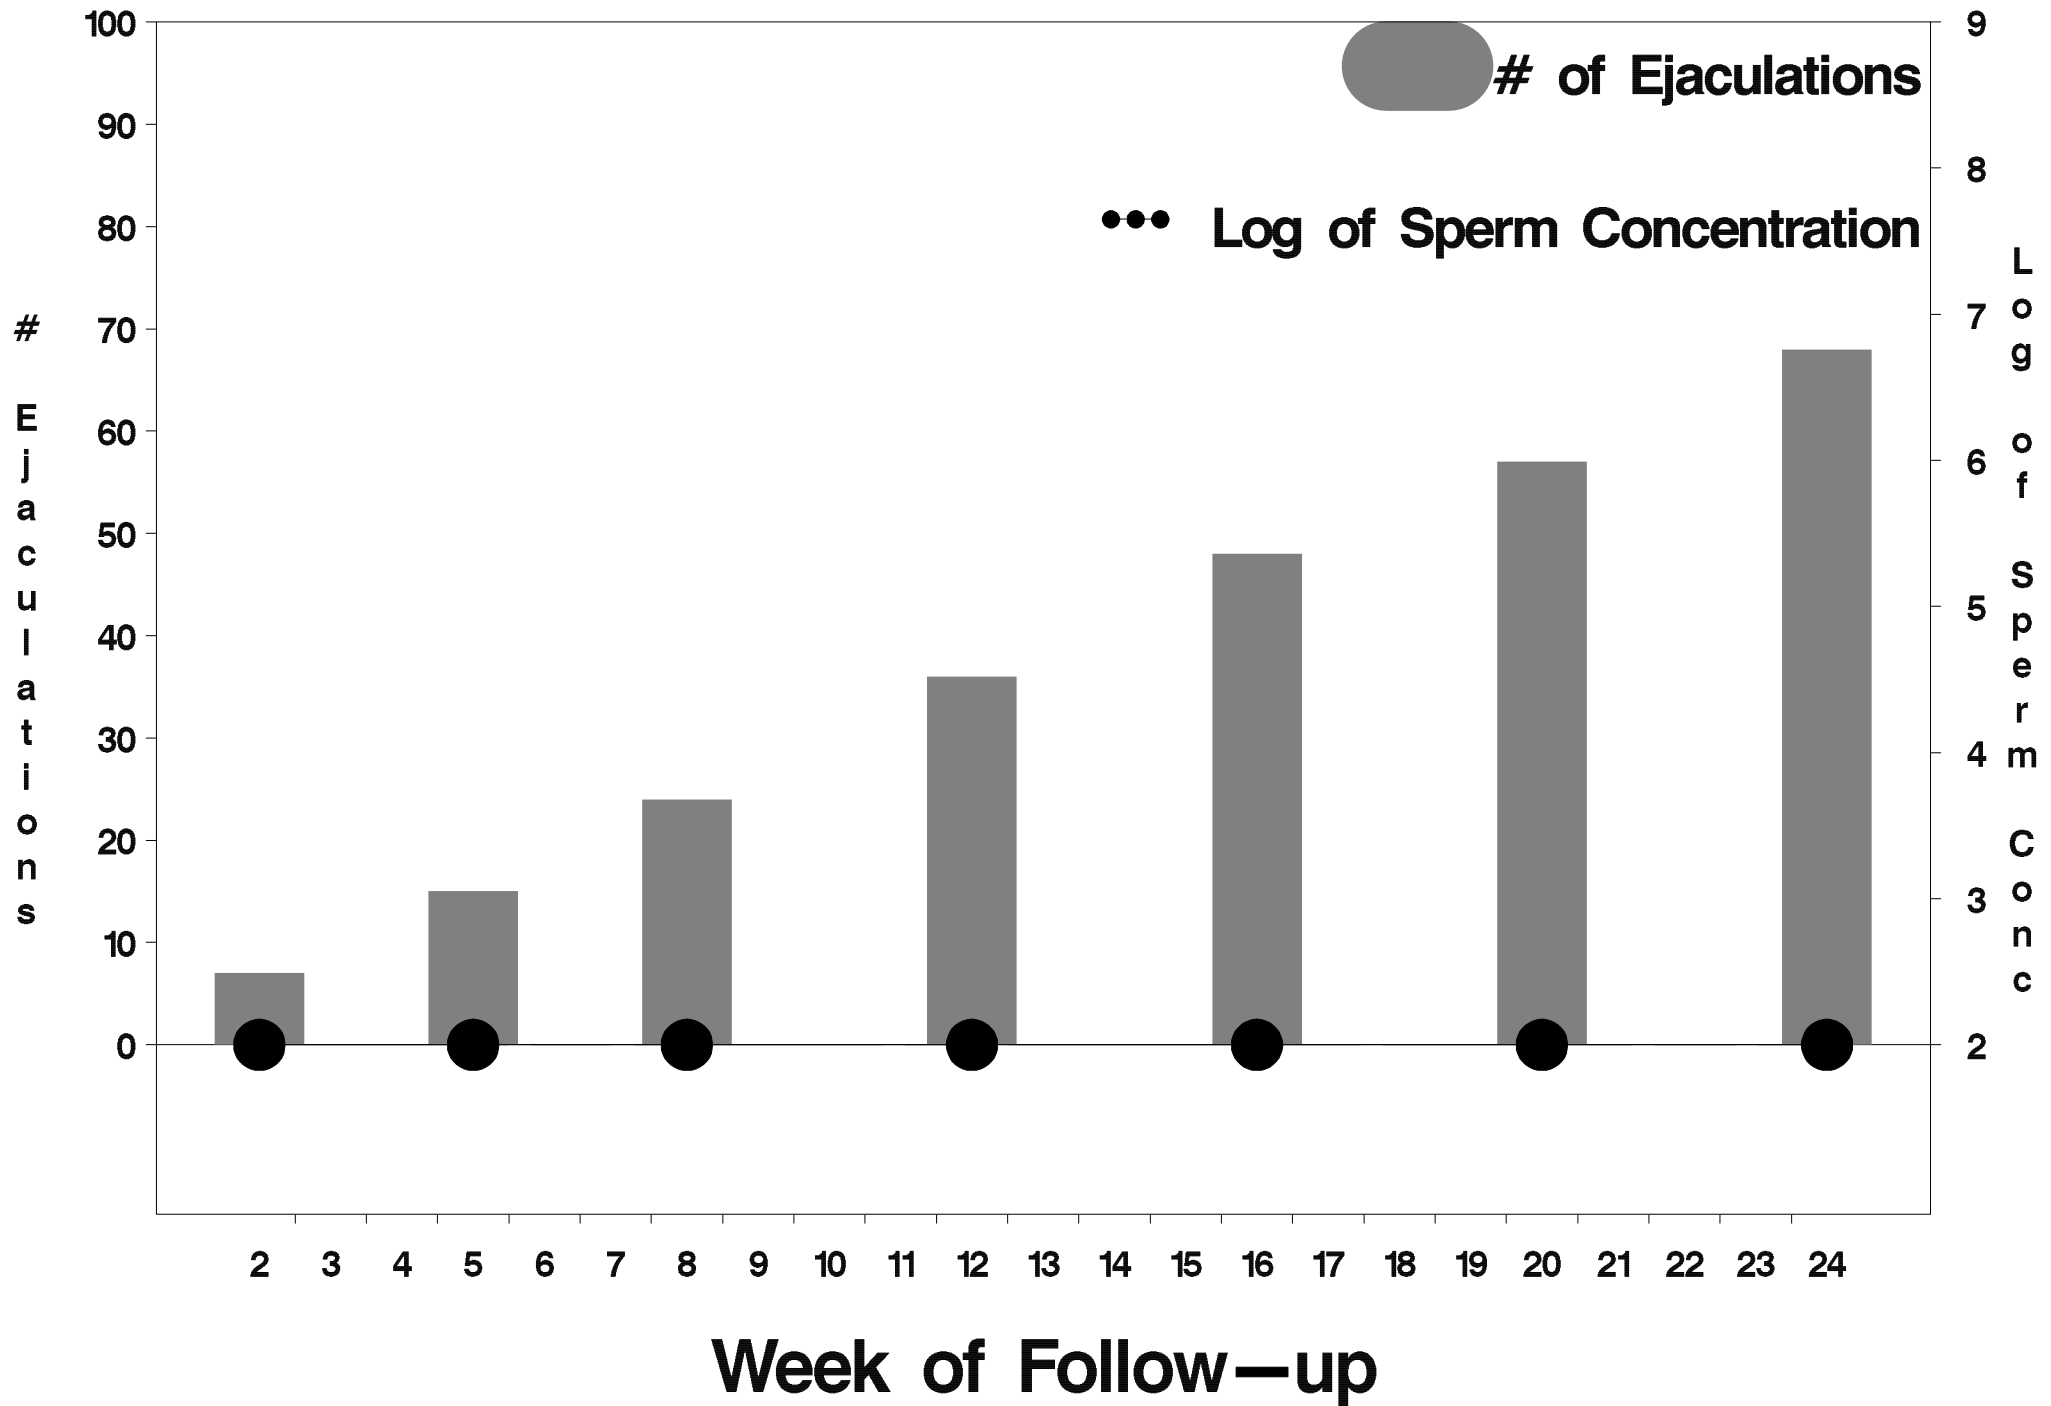

# Participant number= 717

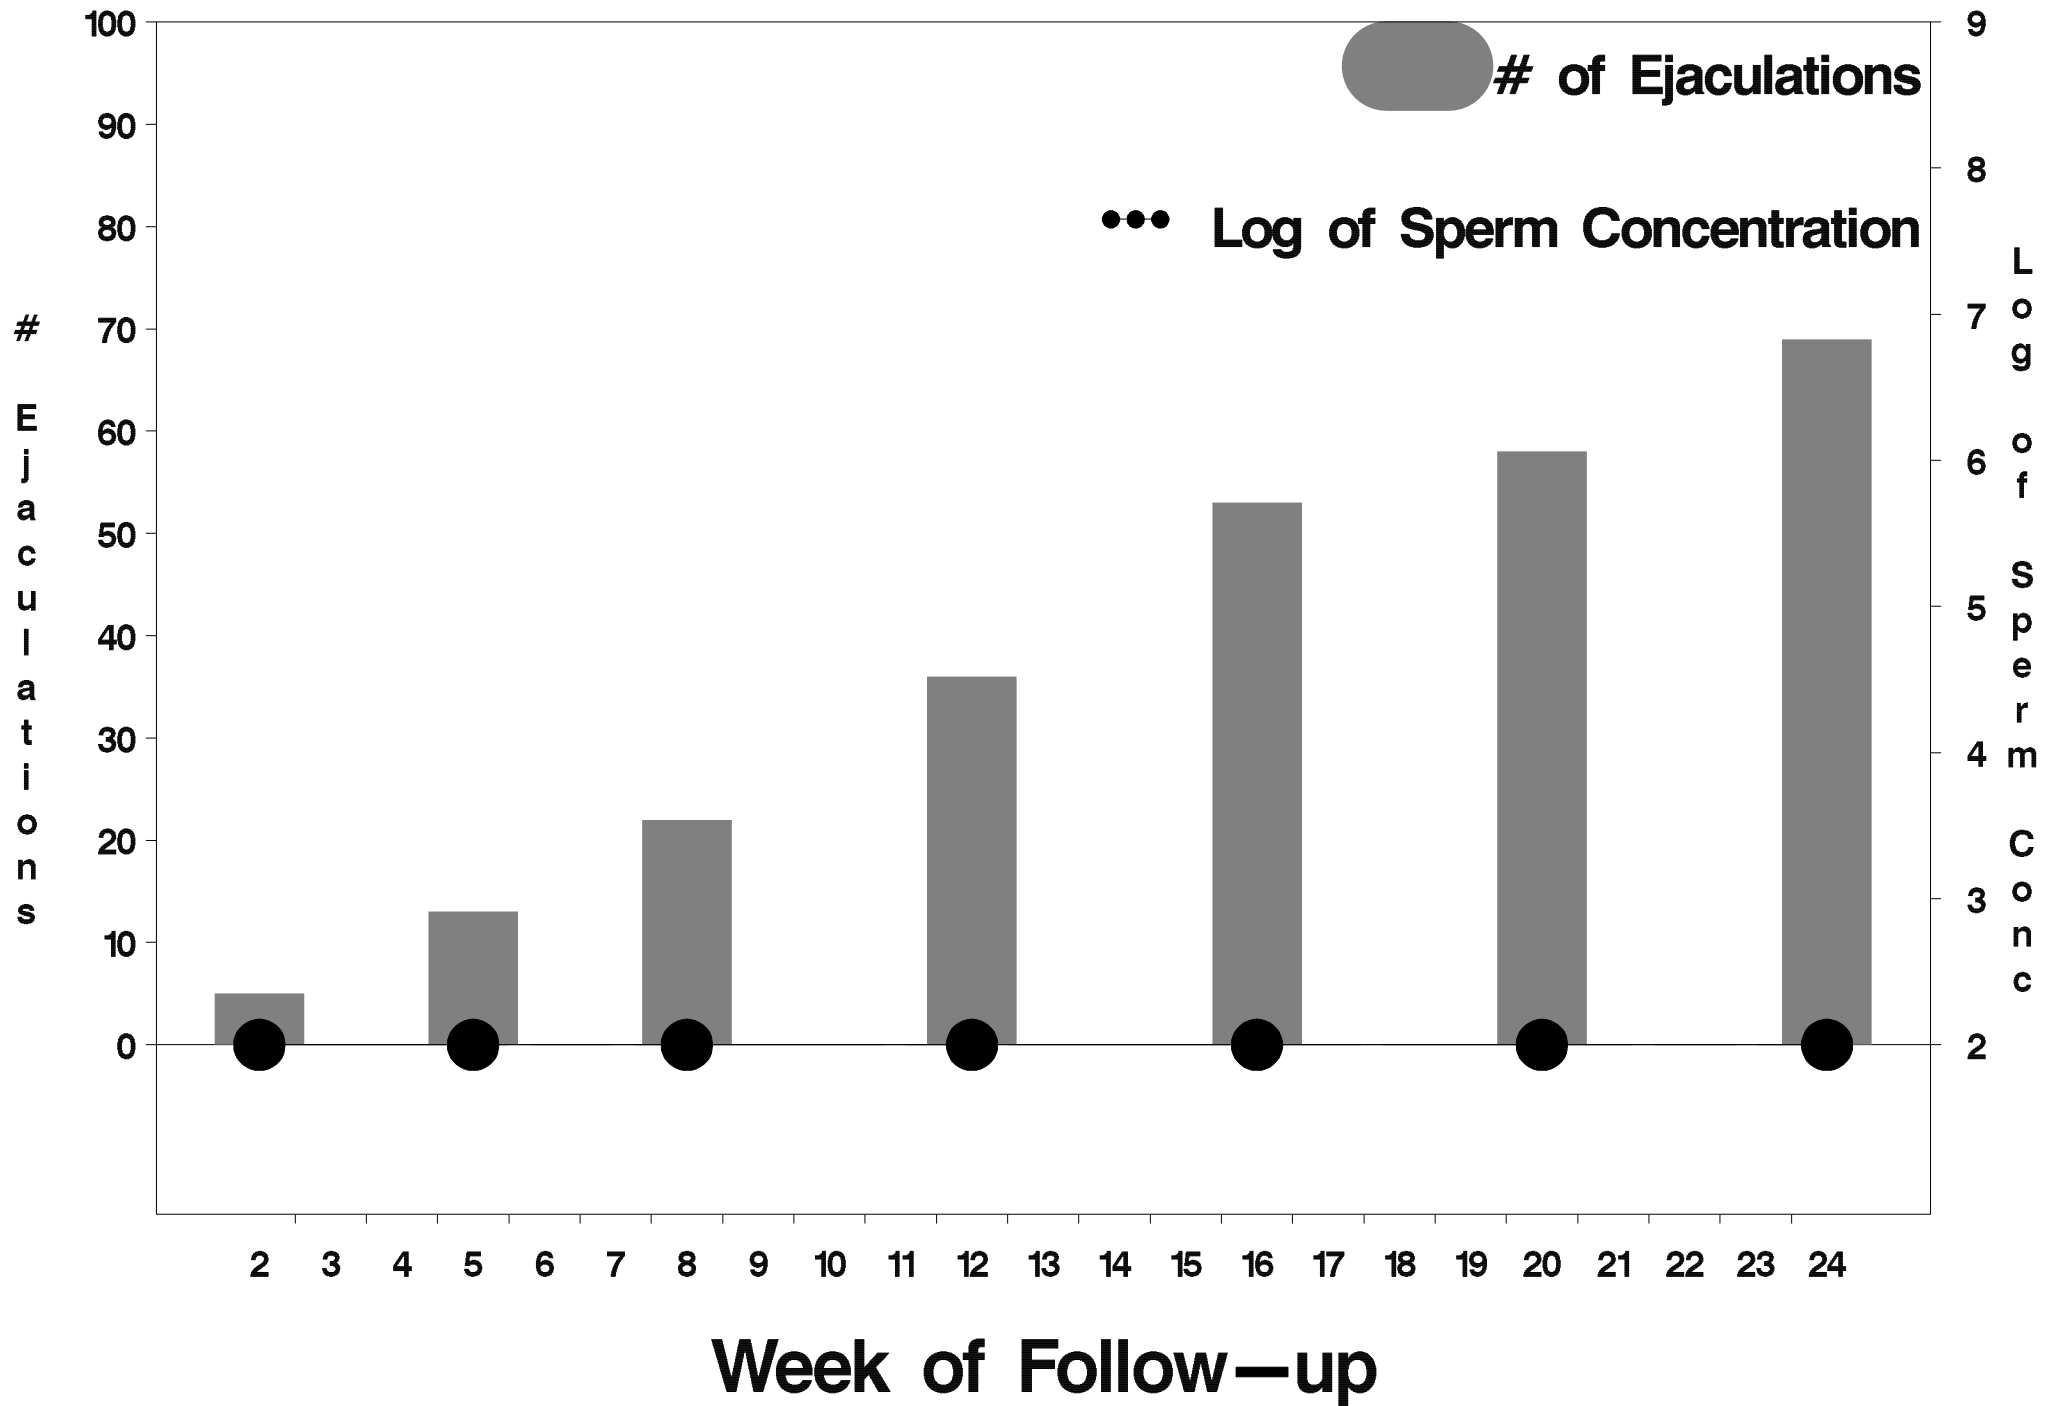

# Participant number= 718

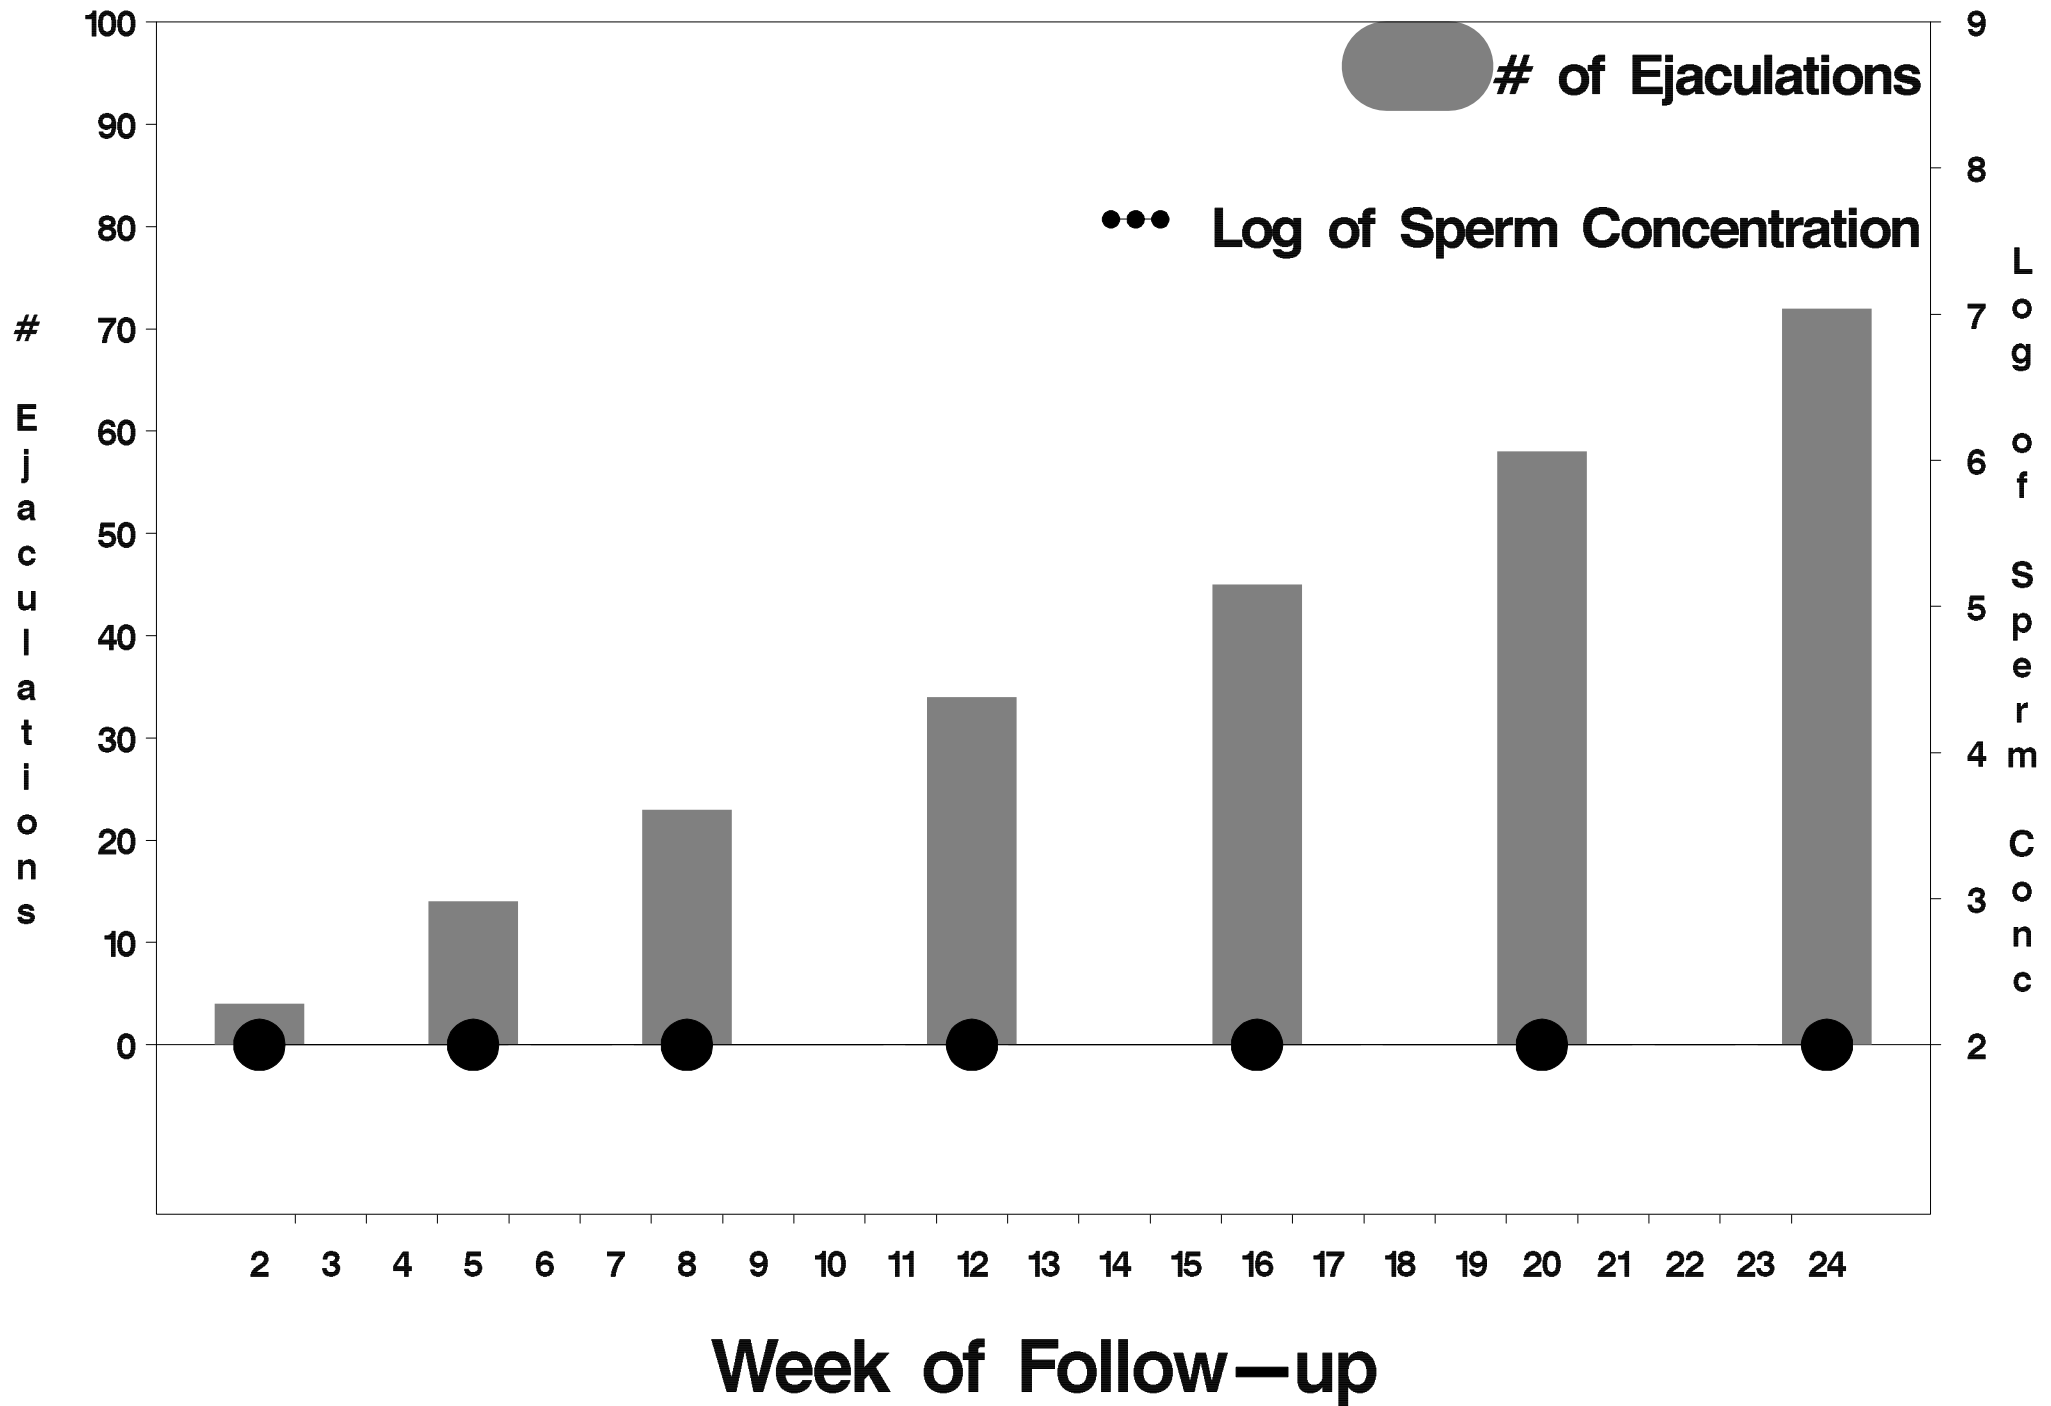



# Participant number= 720

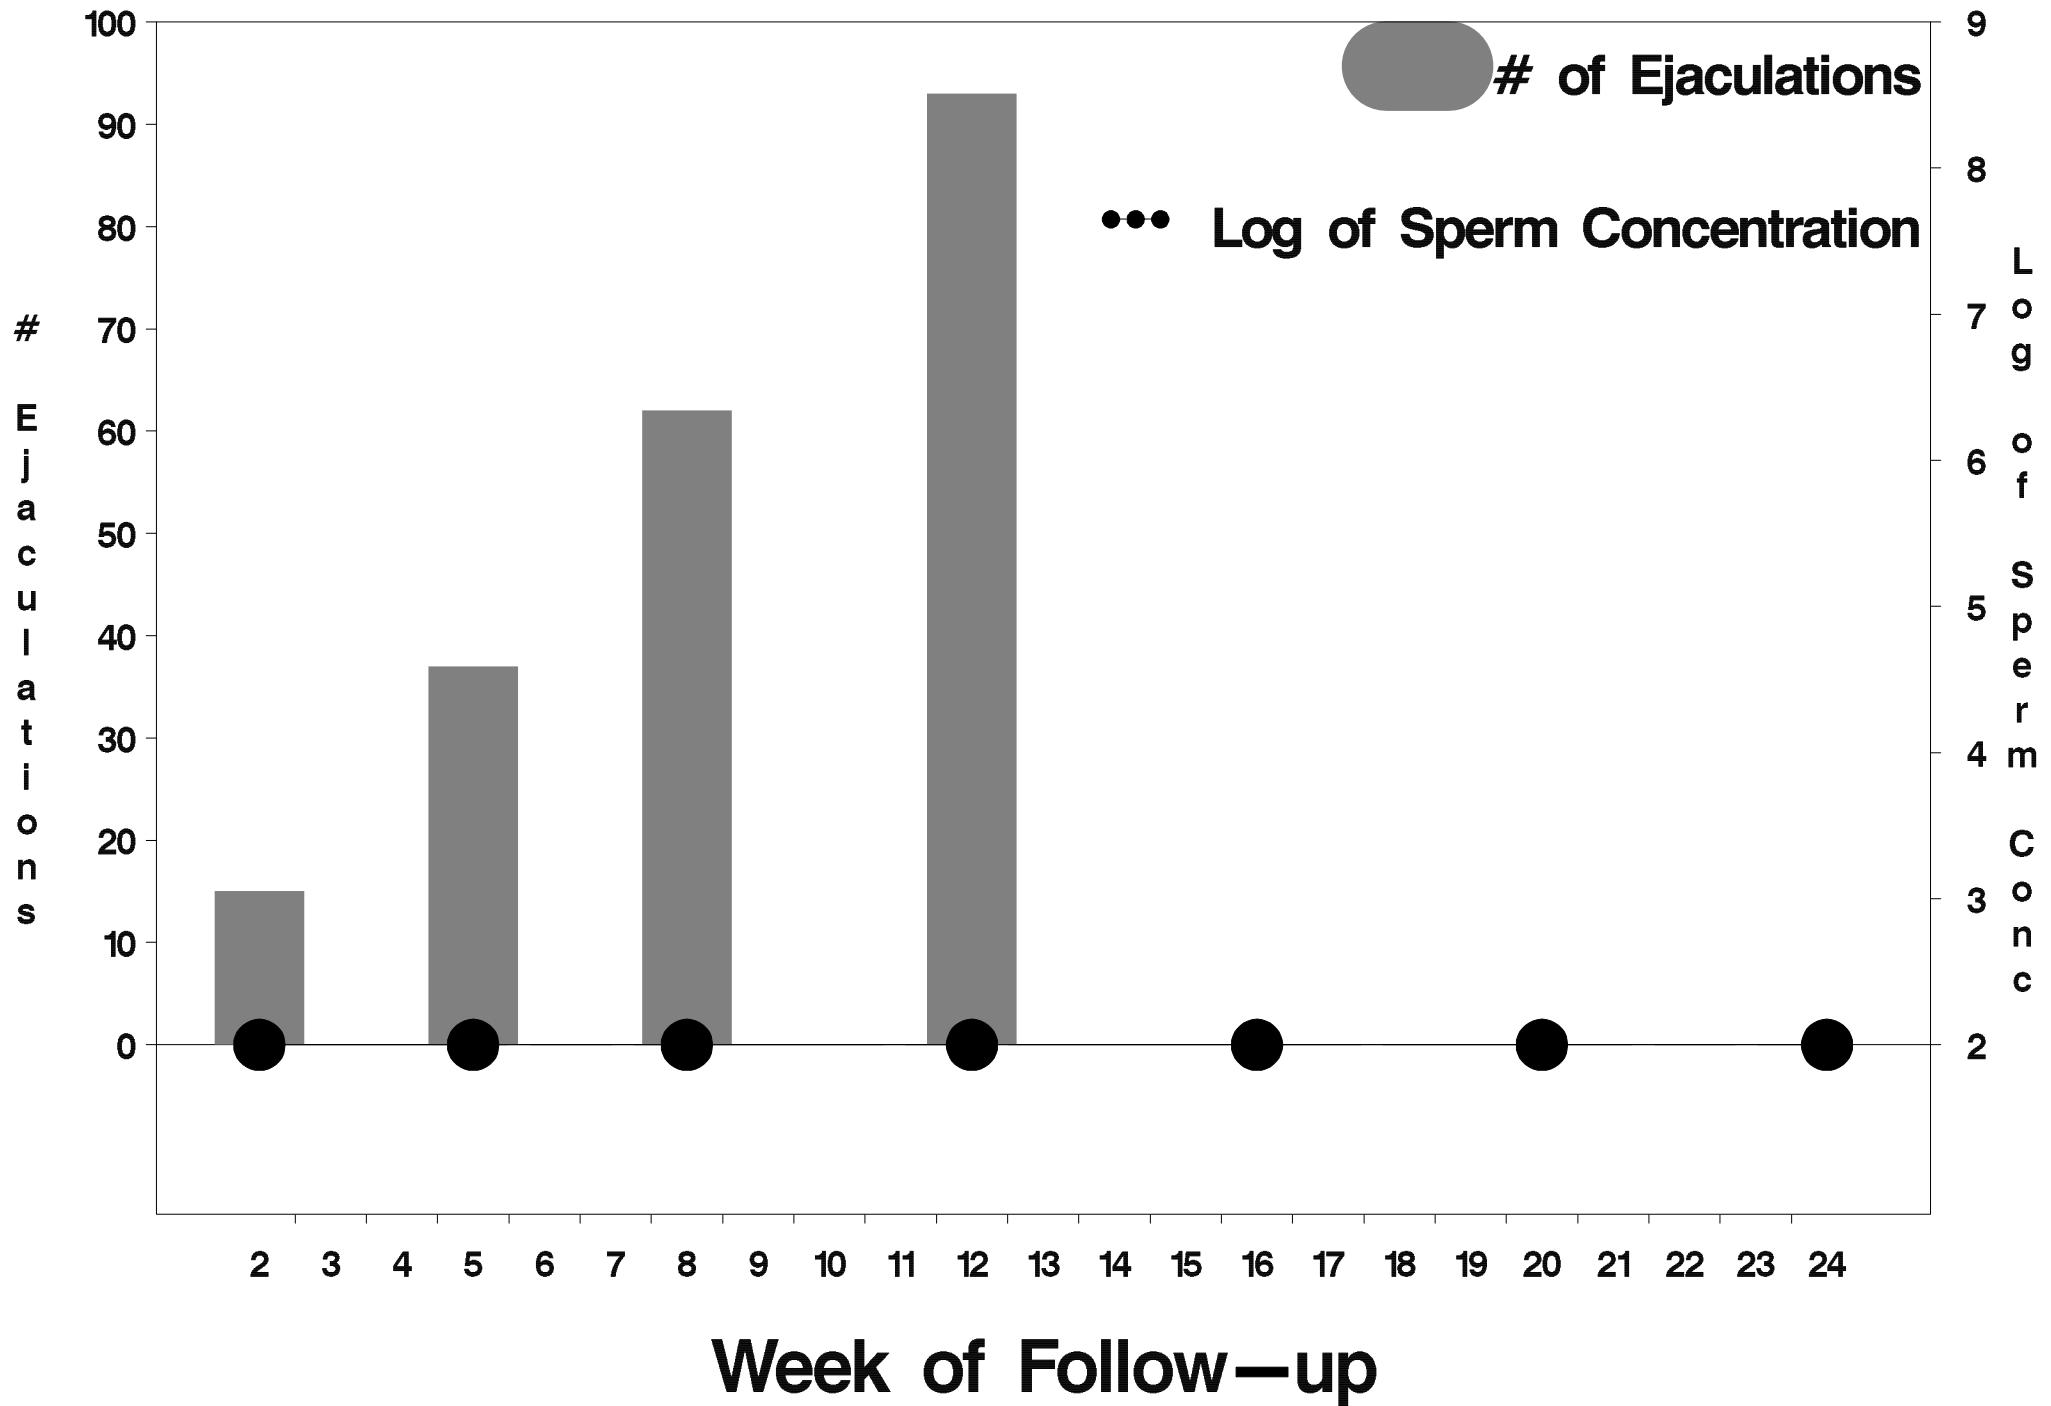



# Participant number= 721

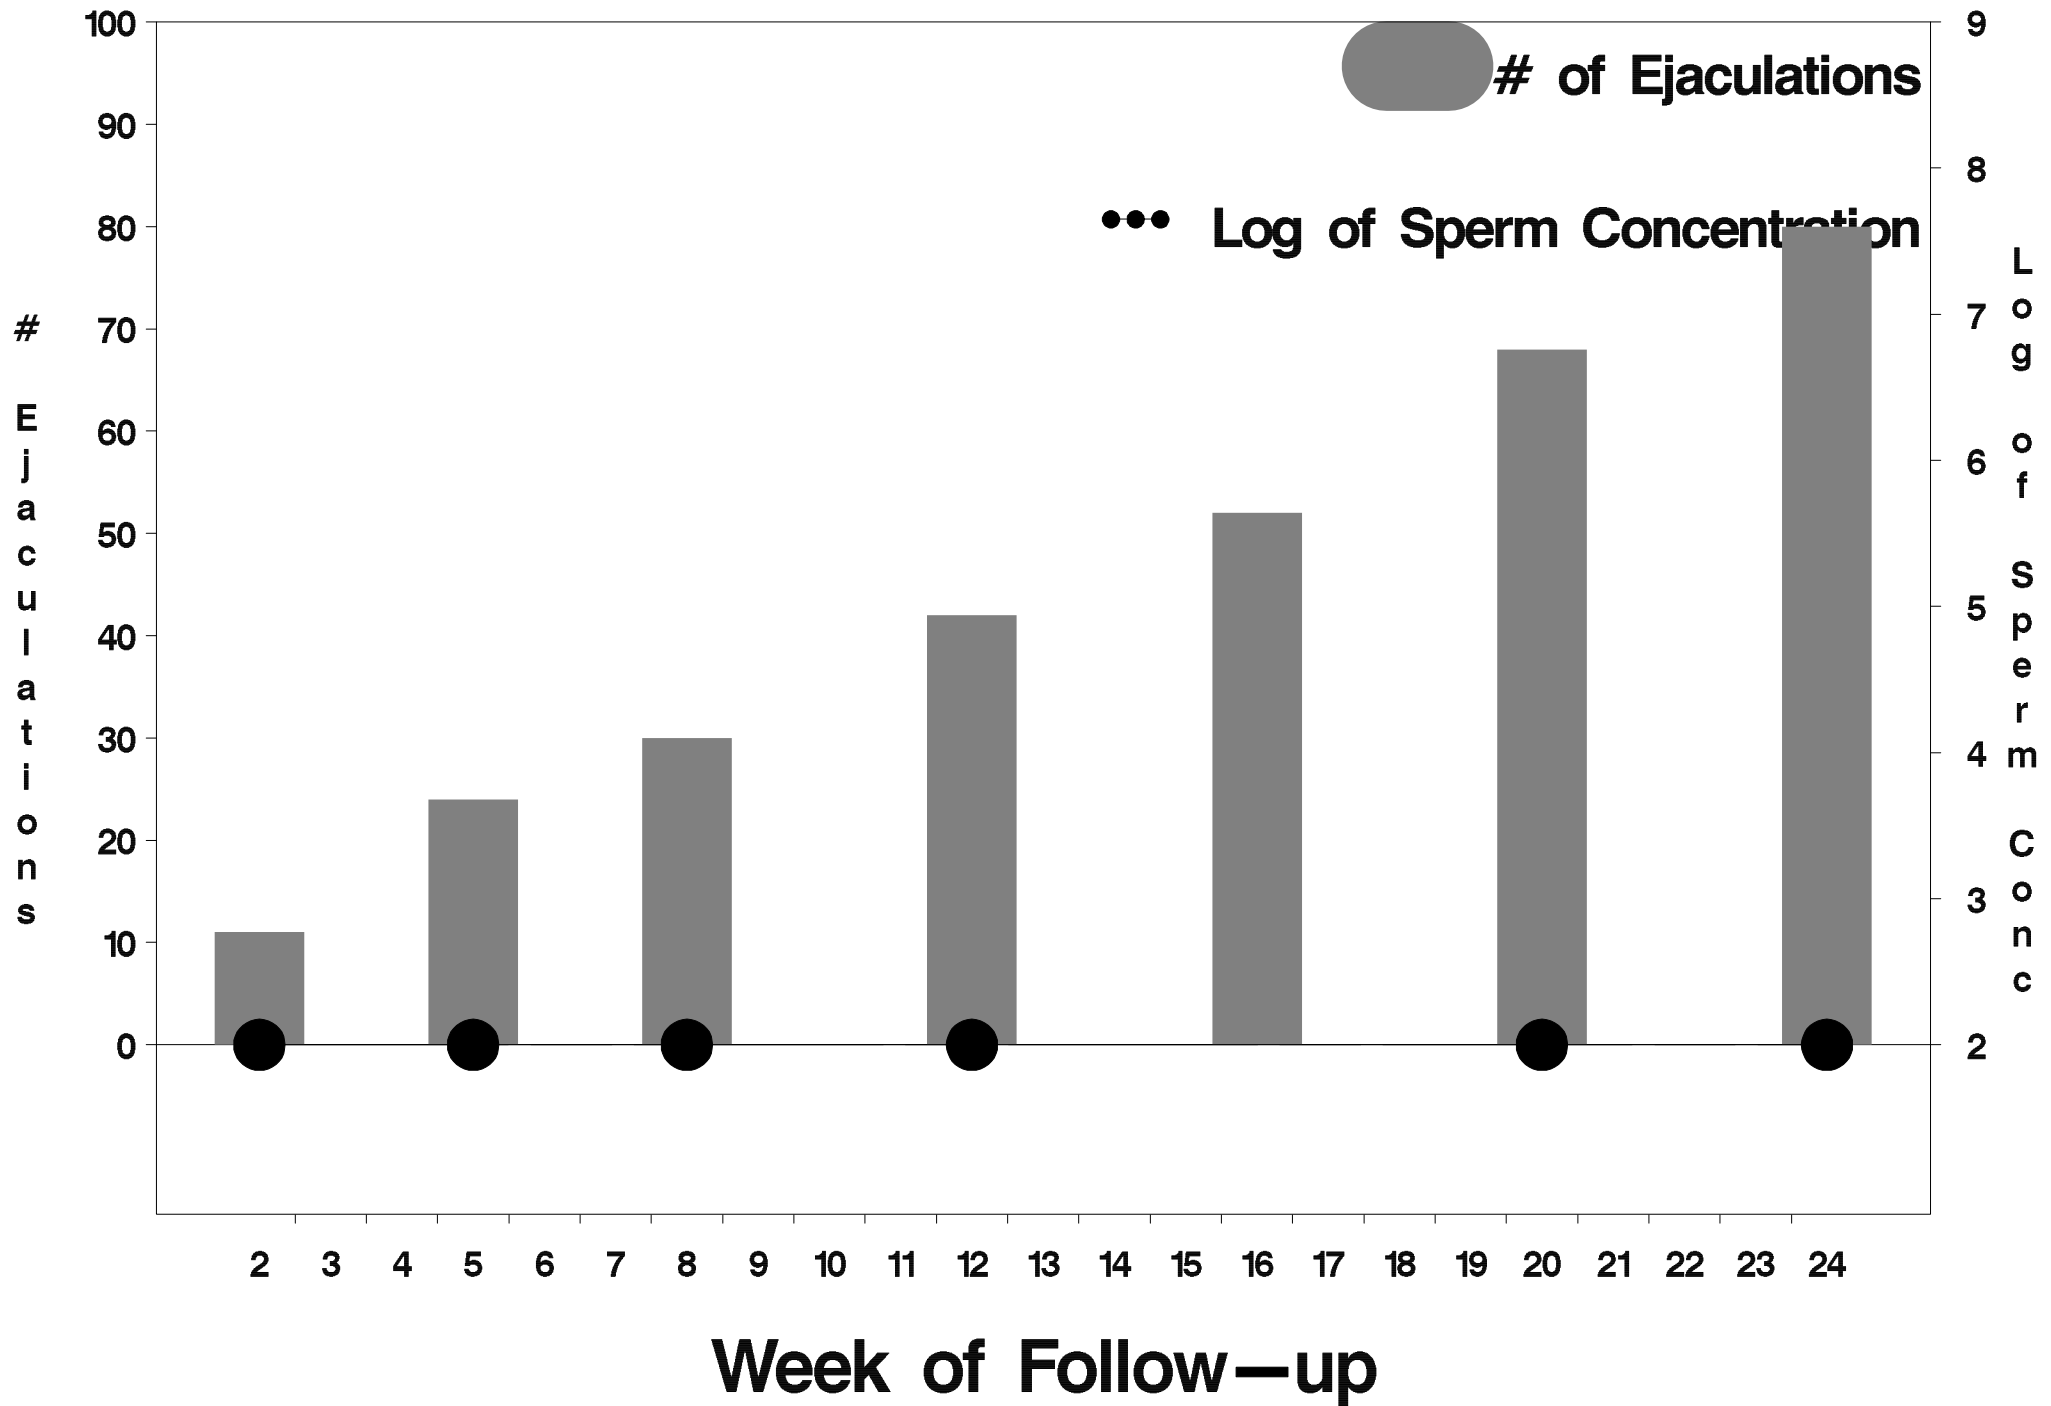

# Participant number= 722

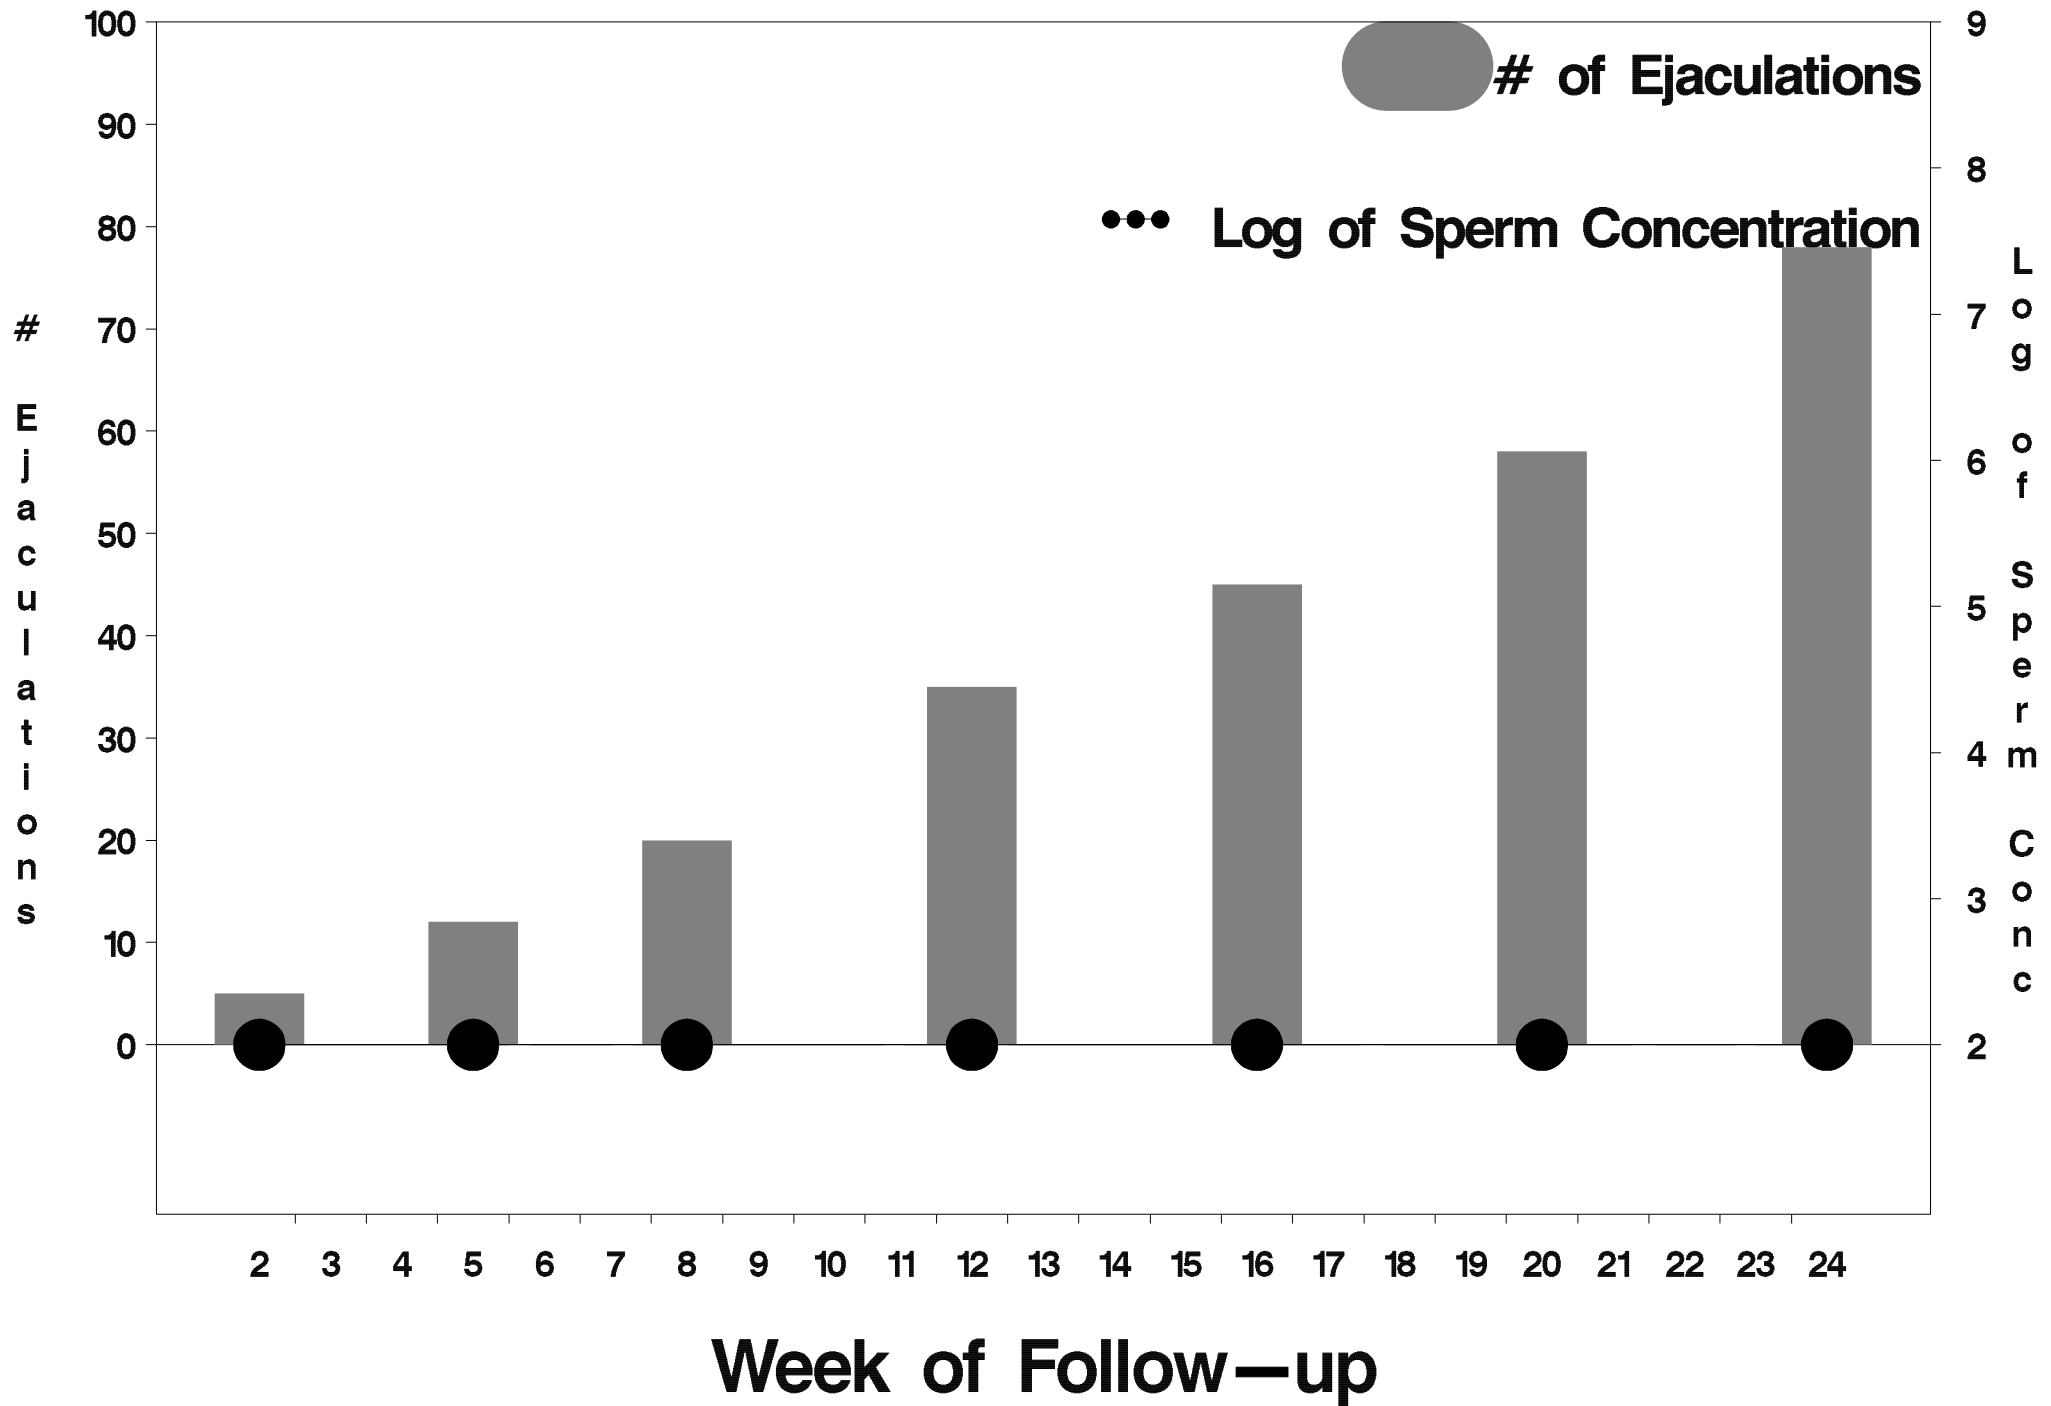

# Participant number= 724

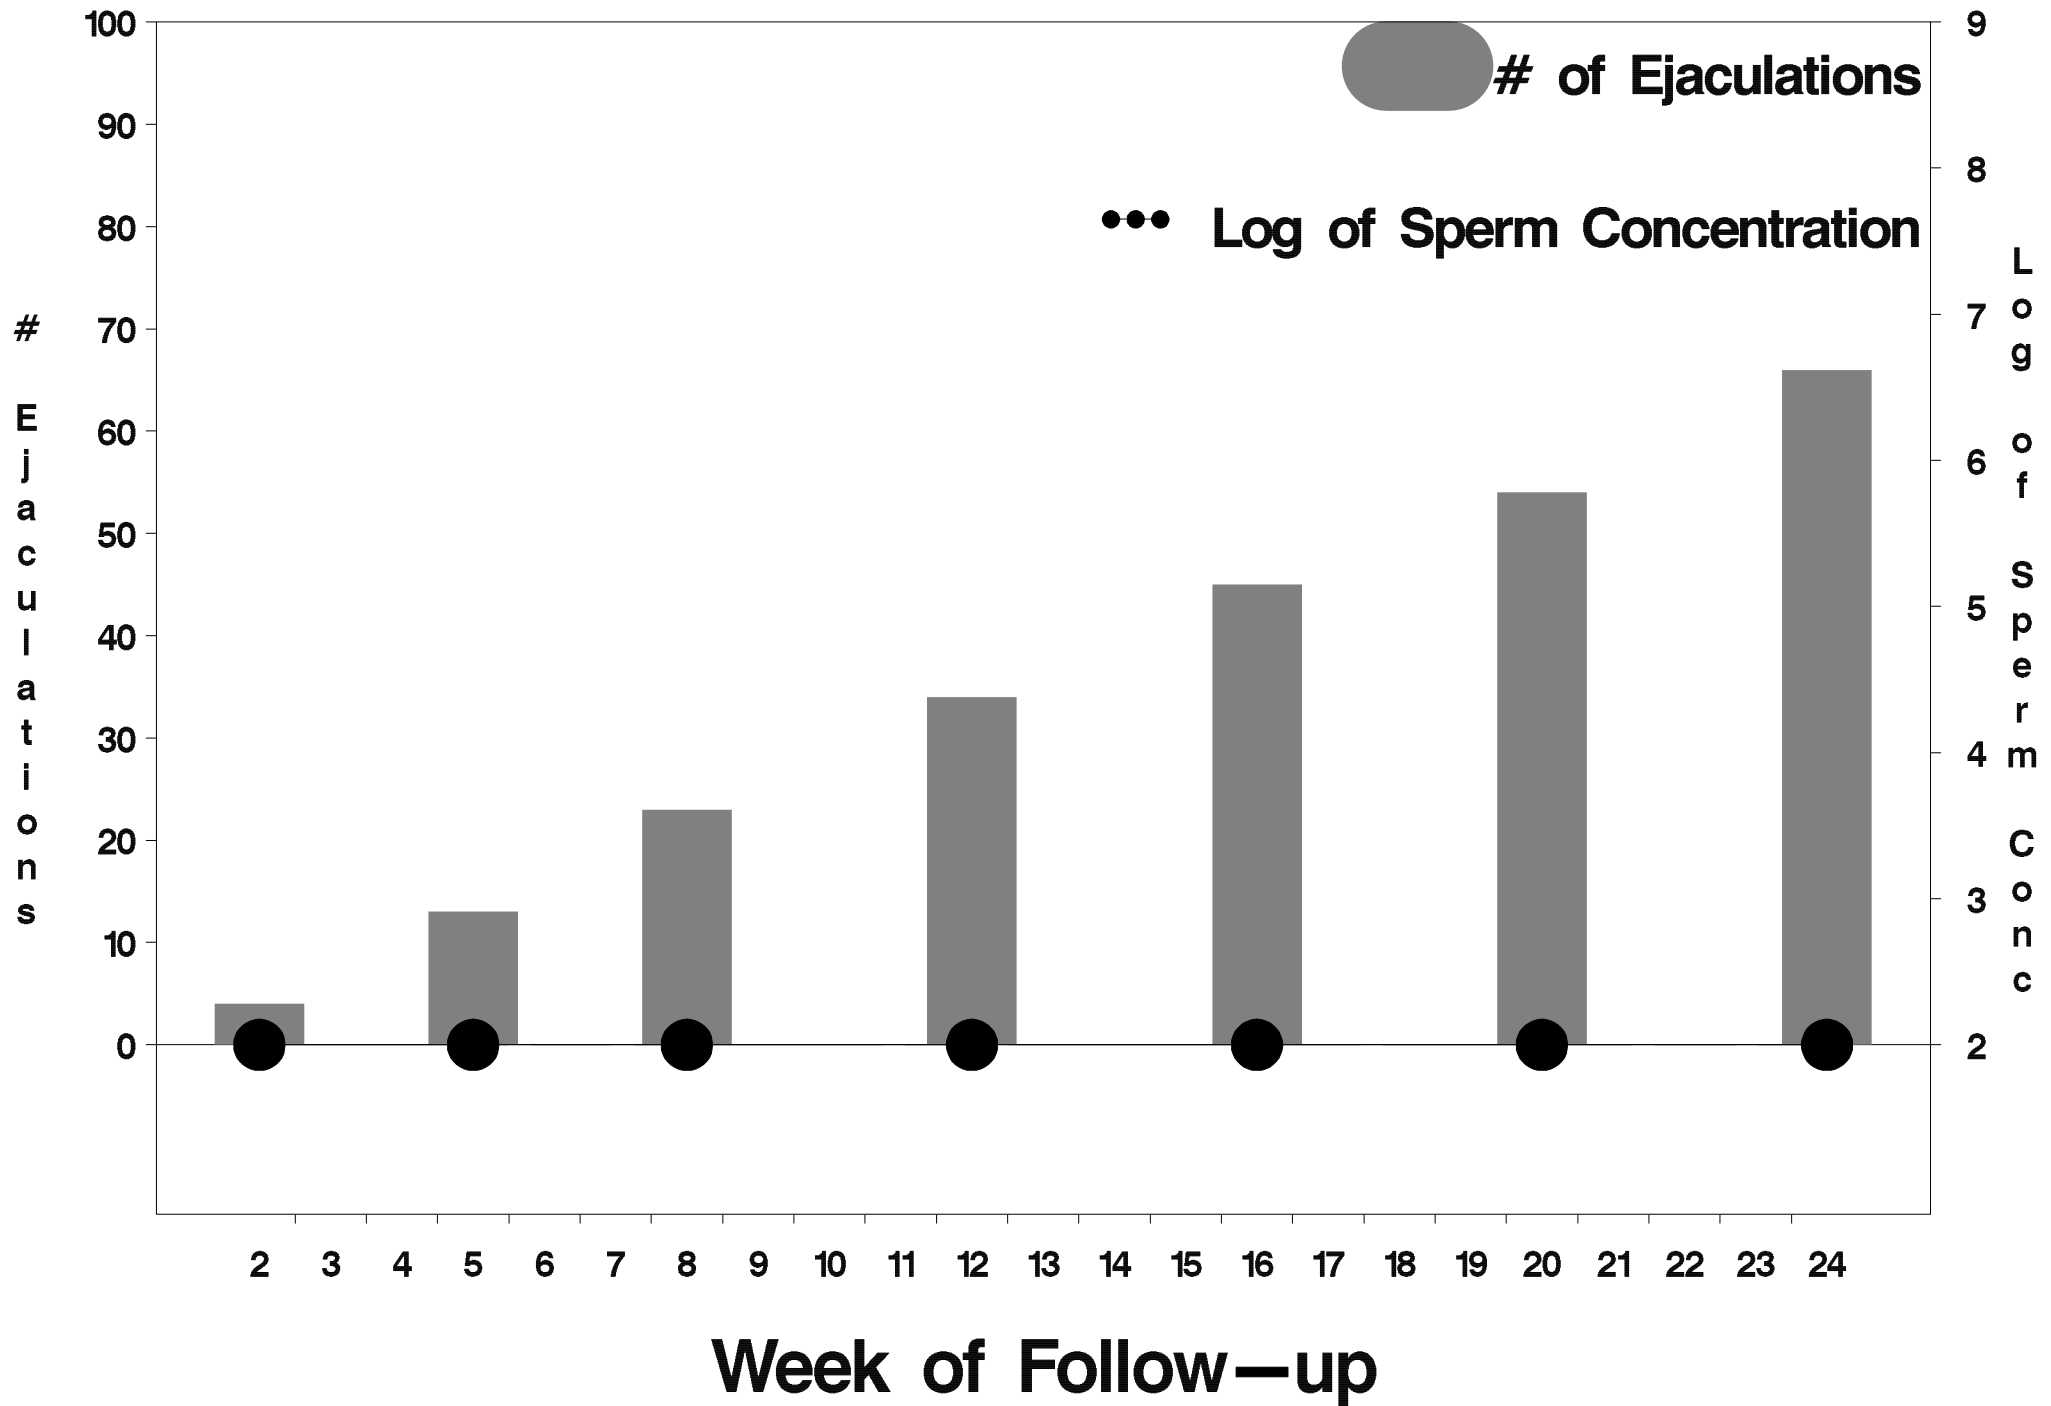

# Participant number= 726

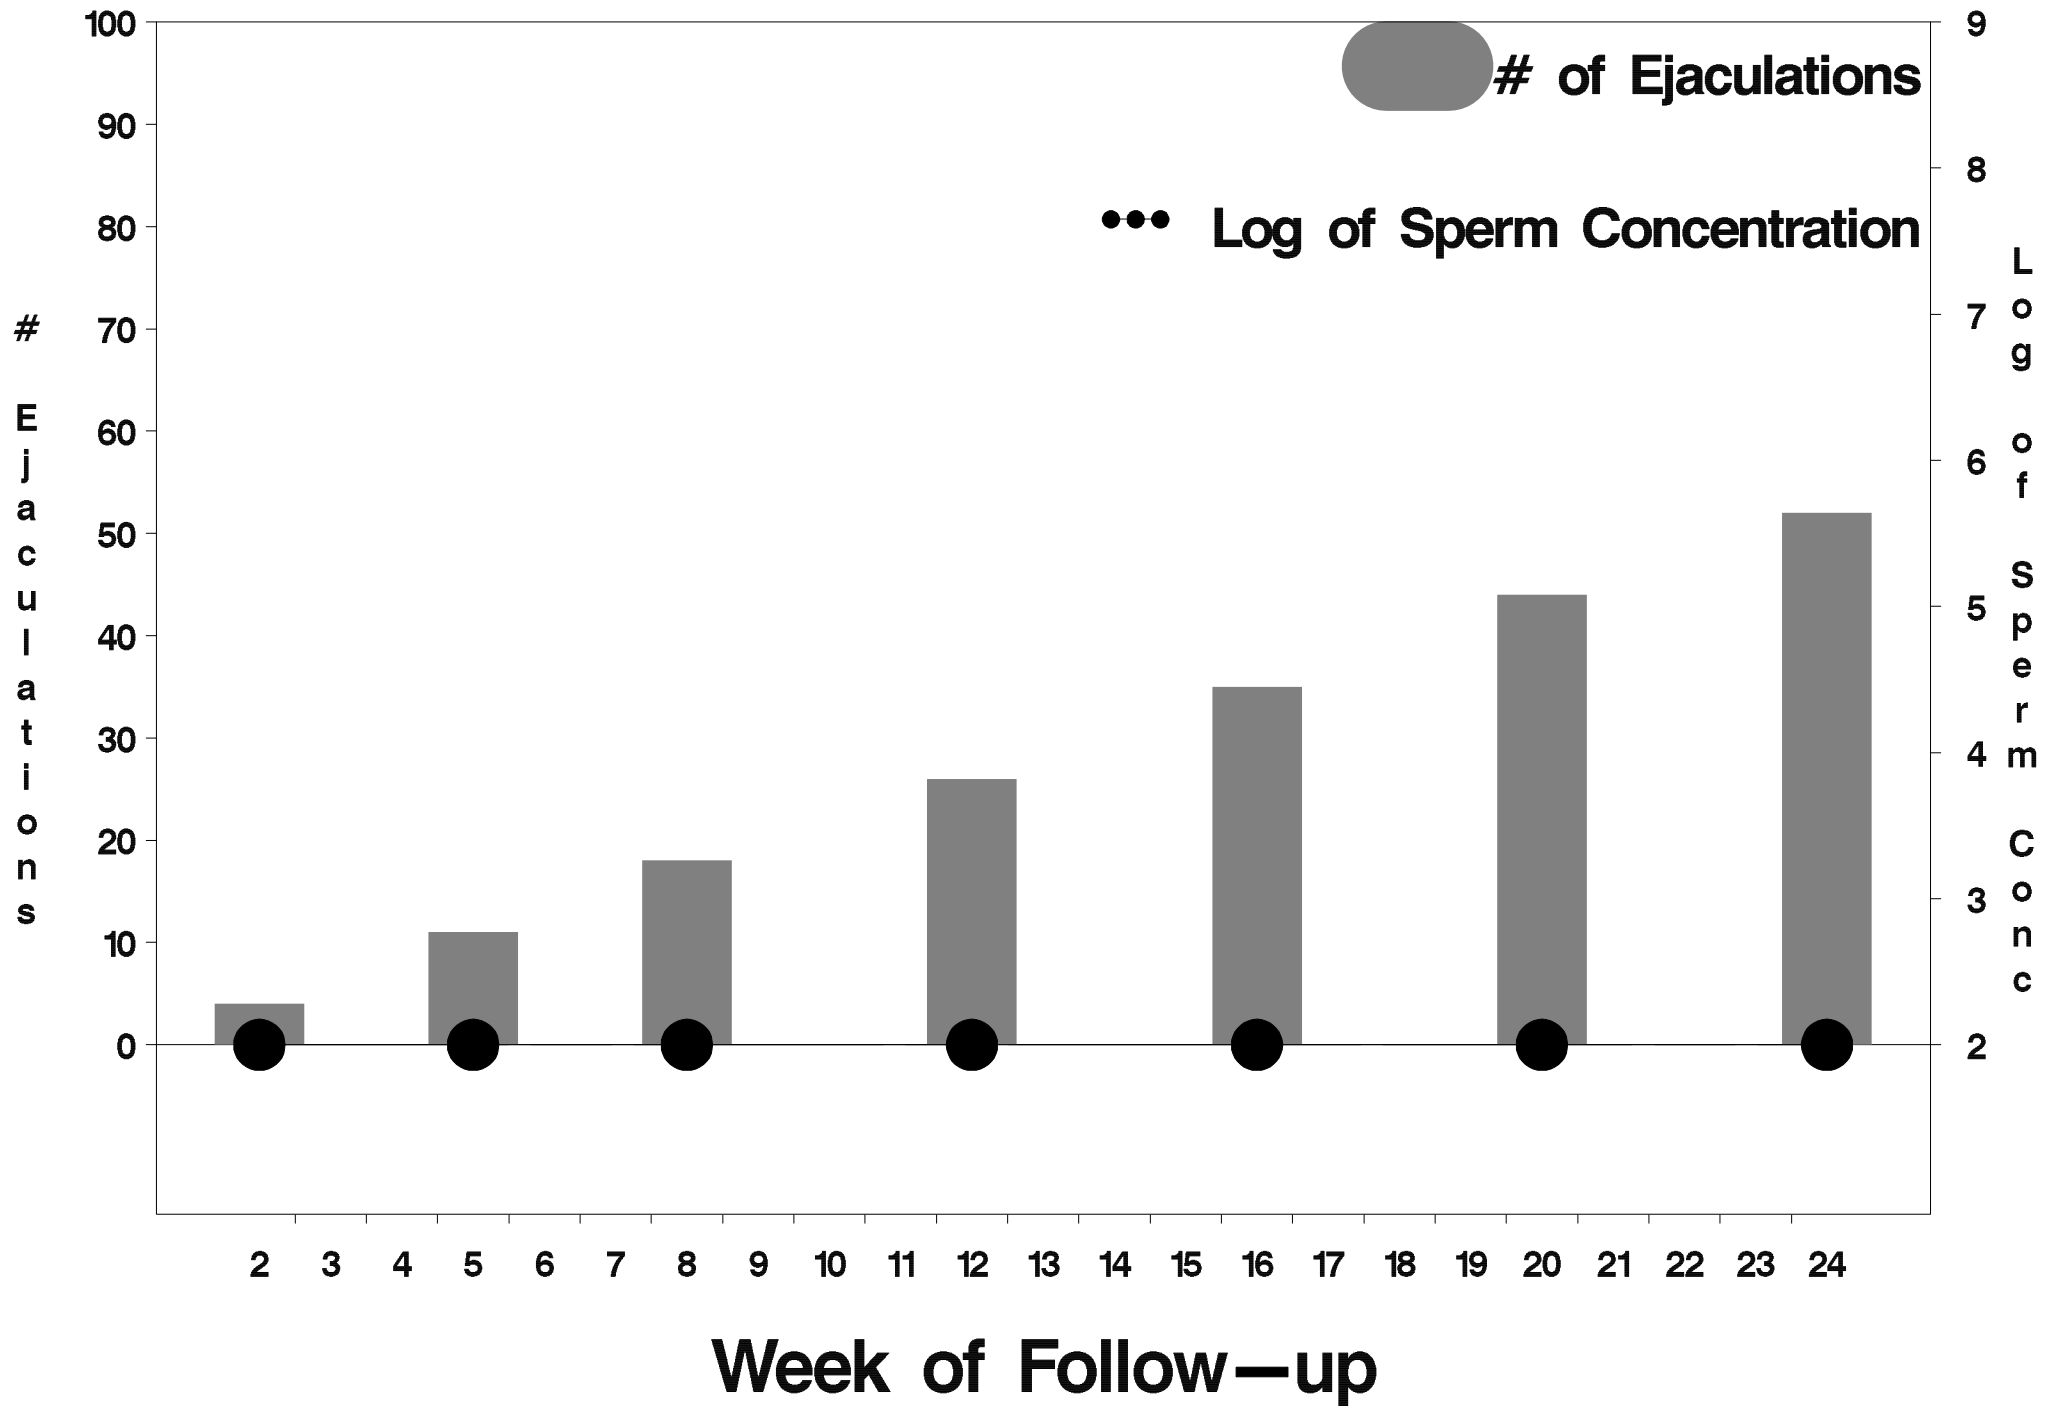

# Participant number= 727

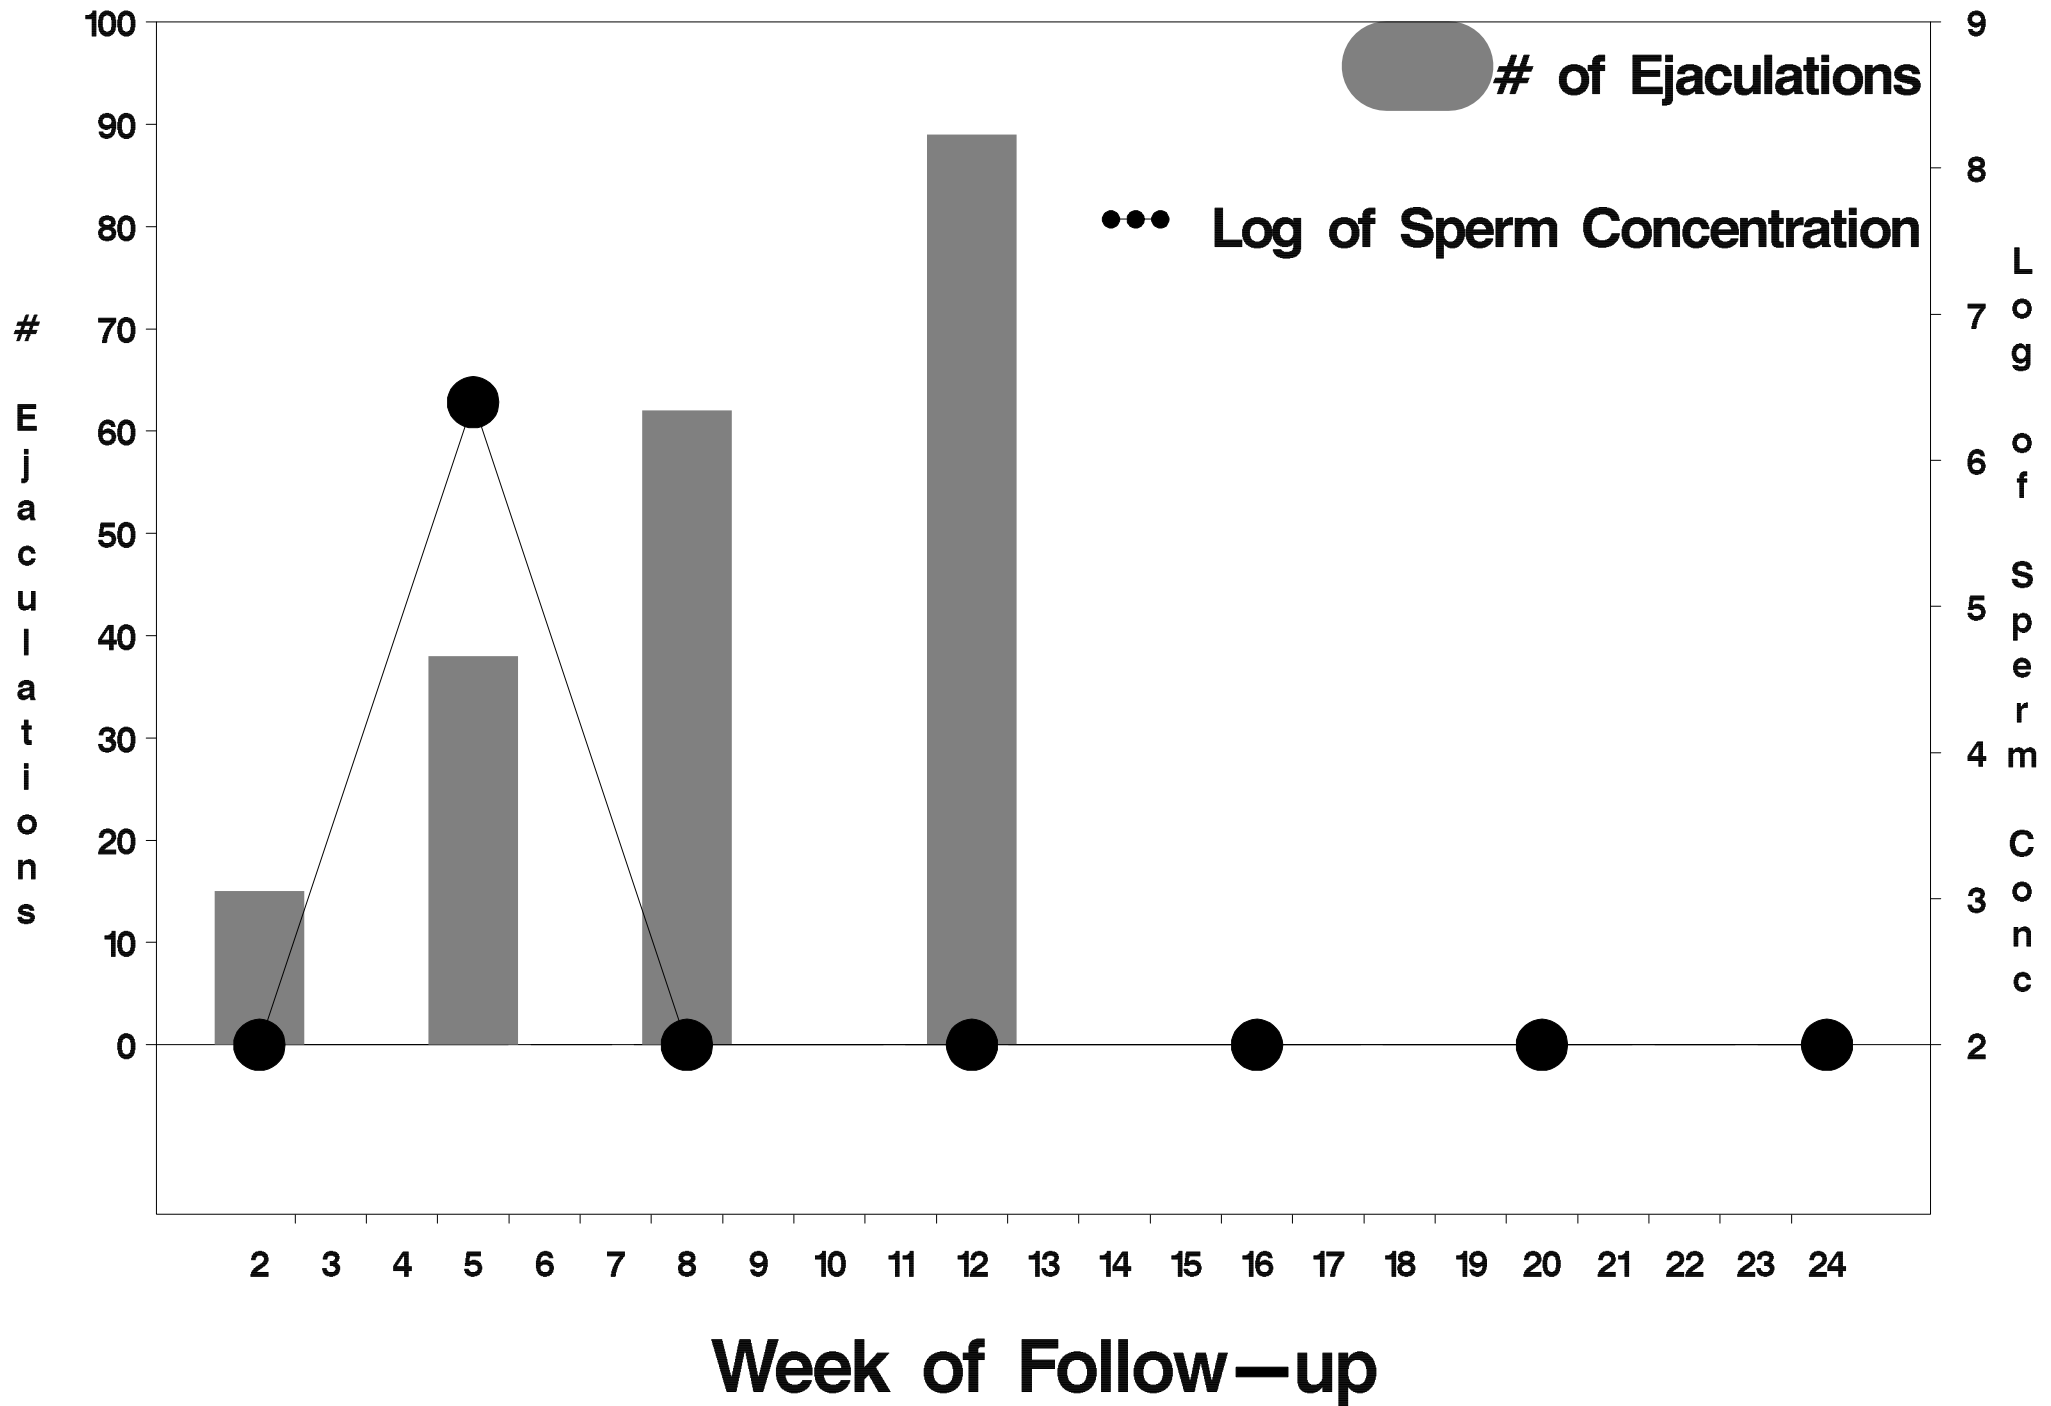

# Participant number= 728

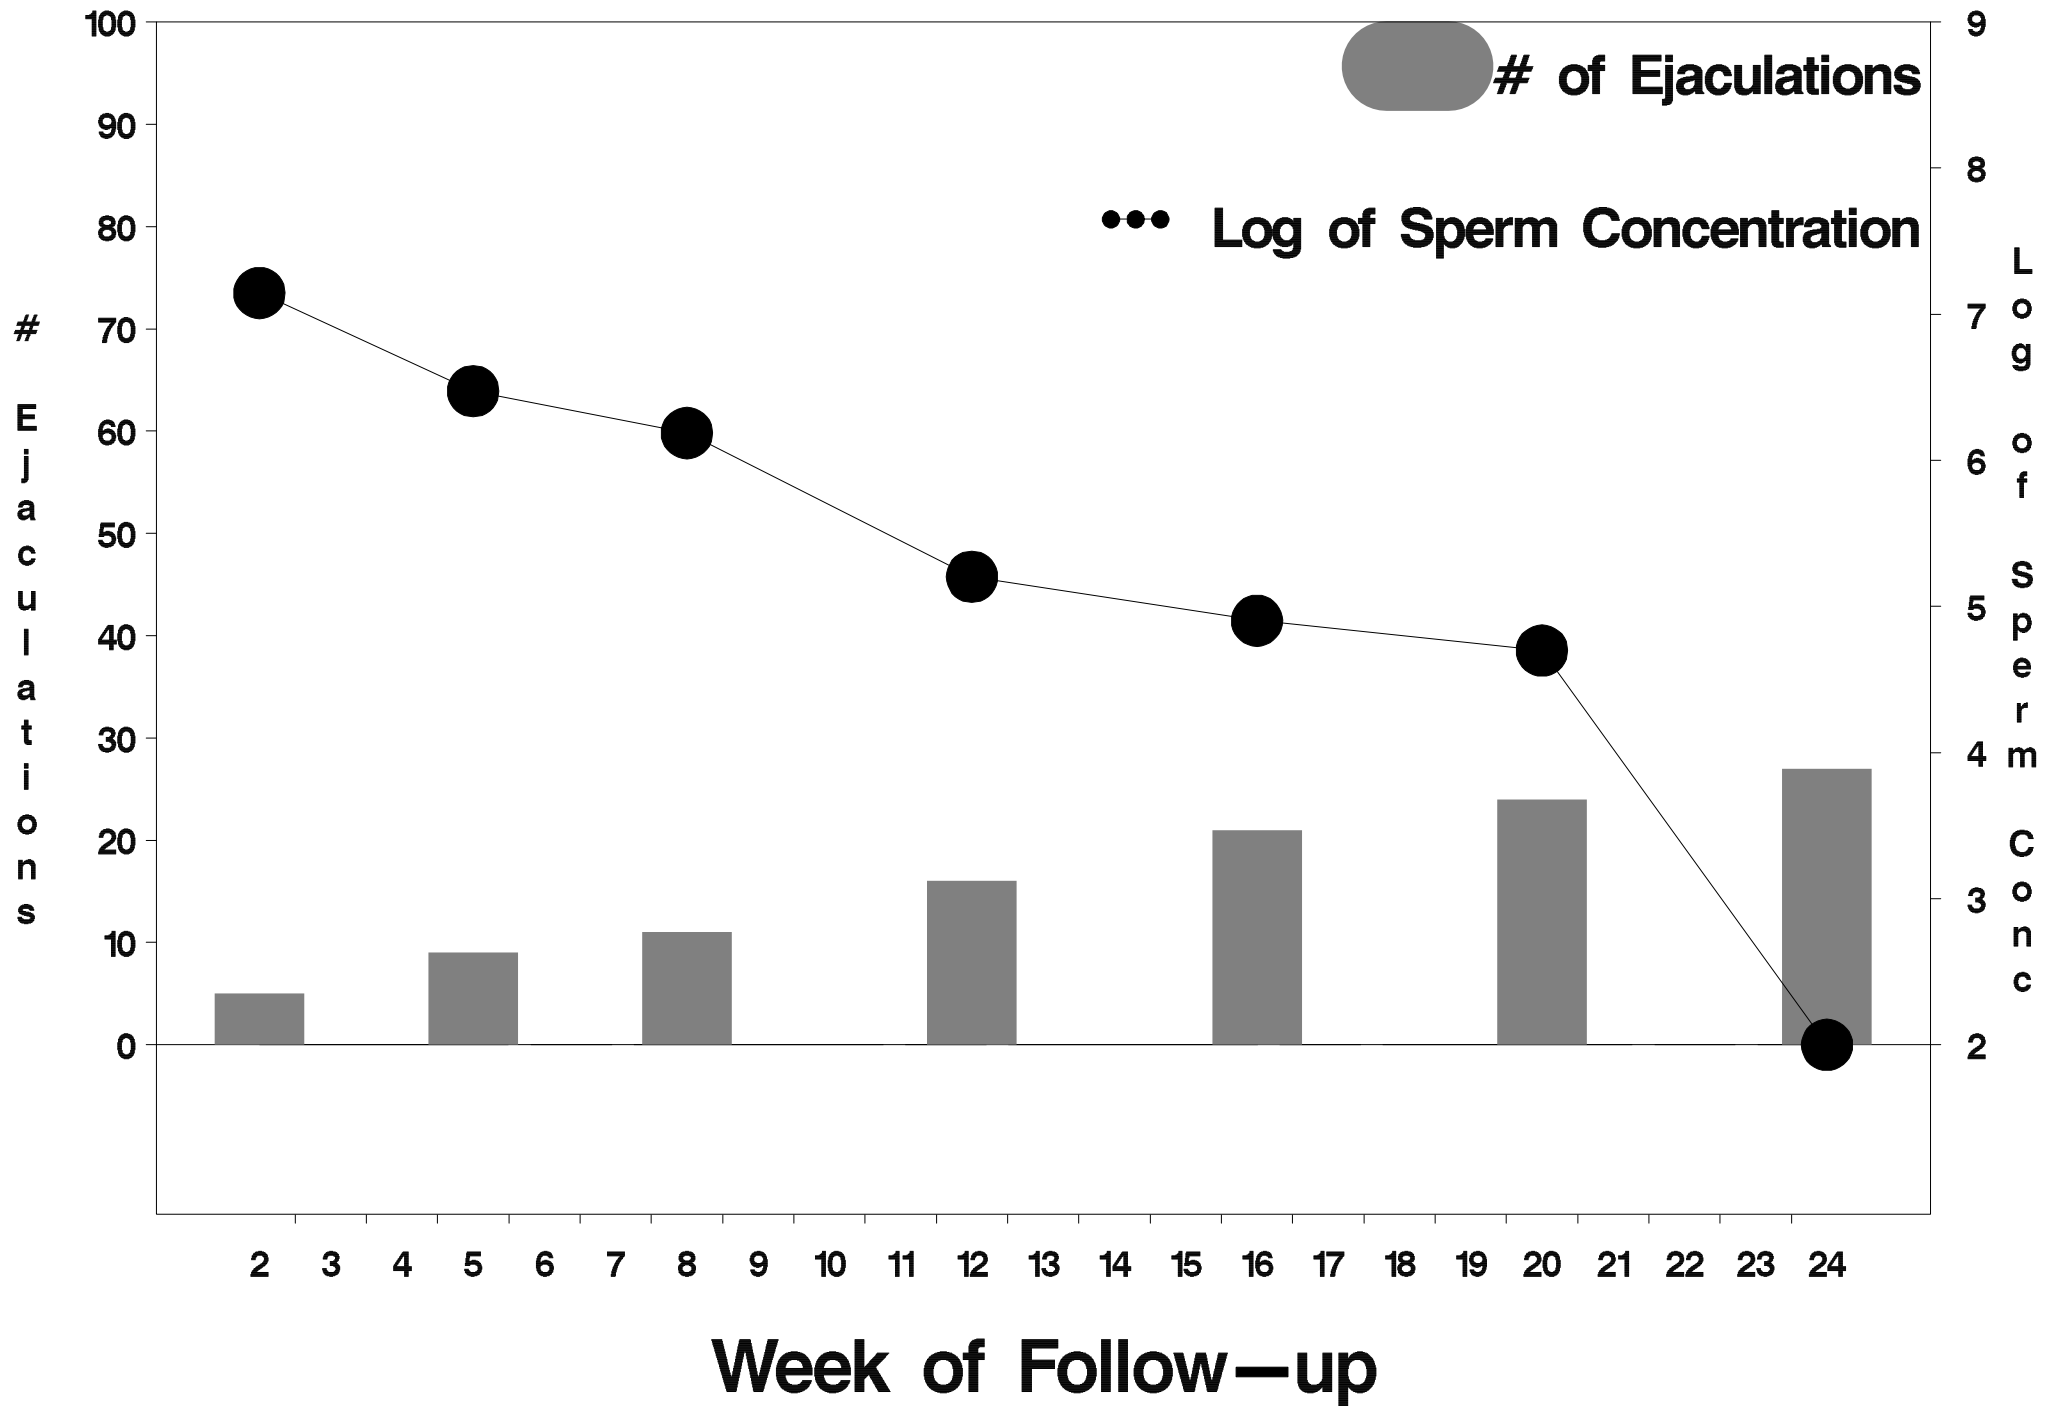

# Participant number= 729

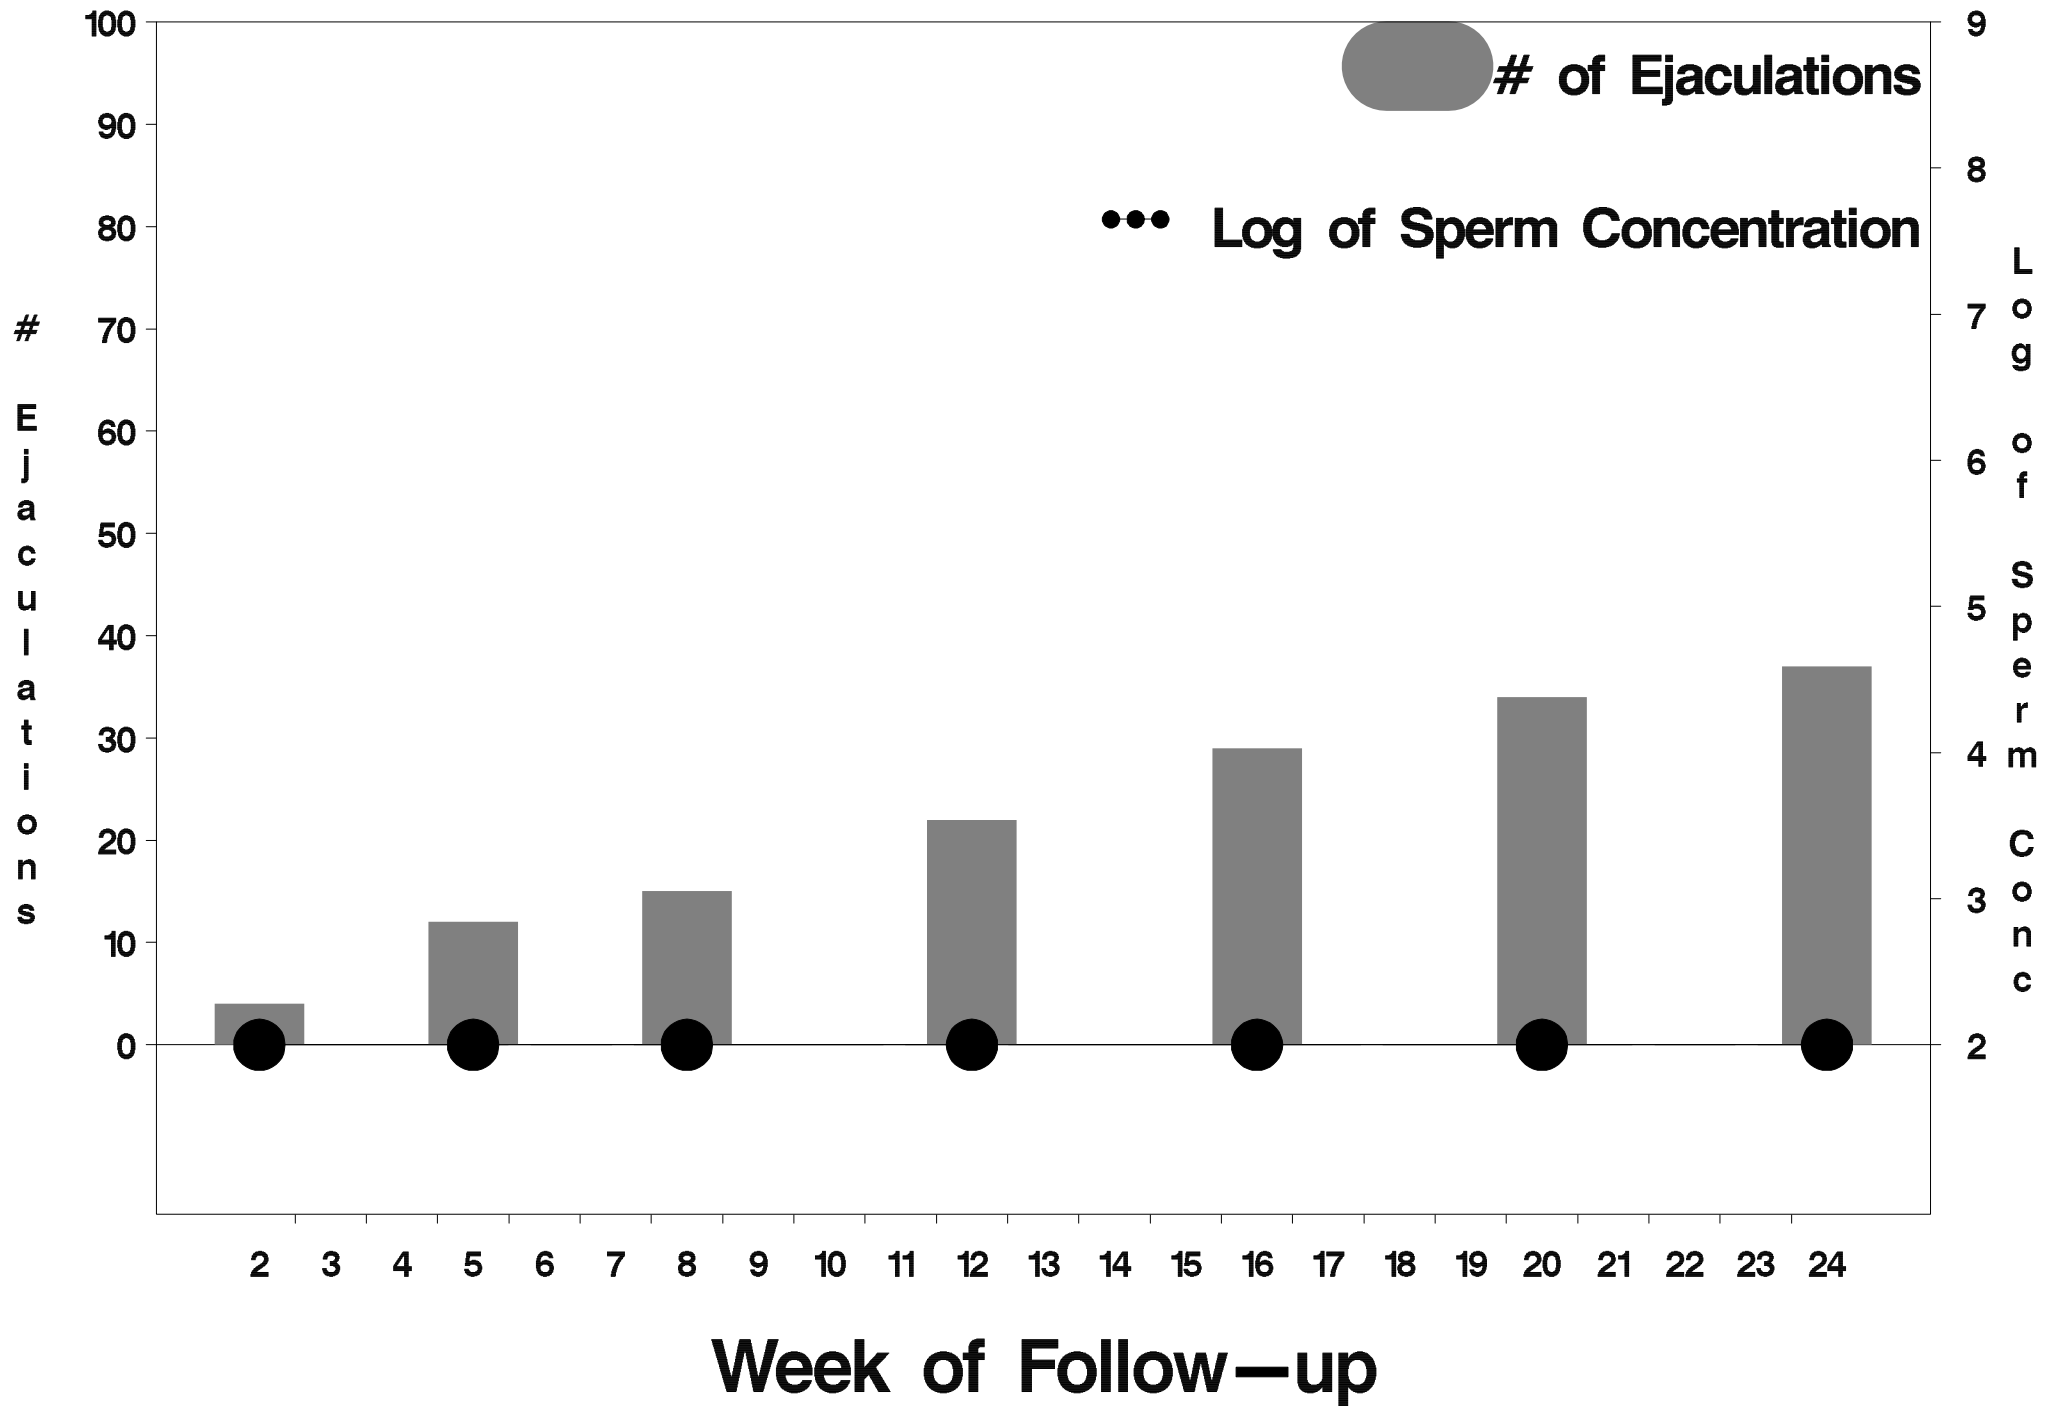

# Participant number= 730

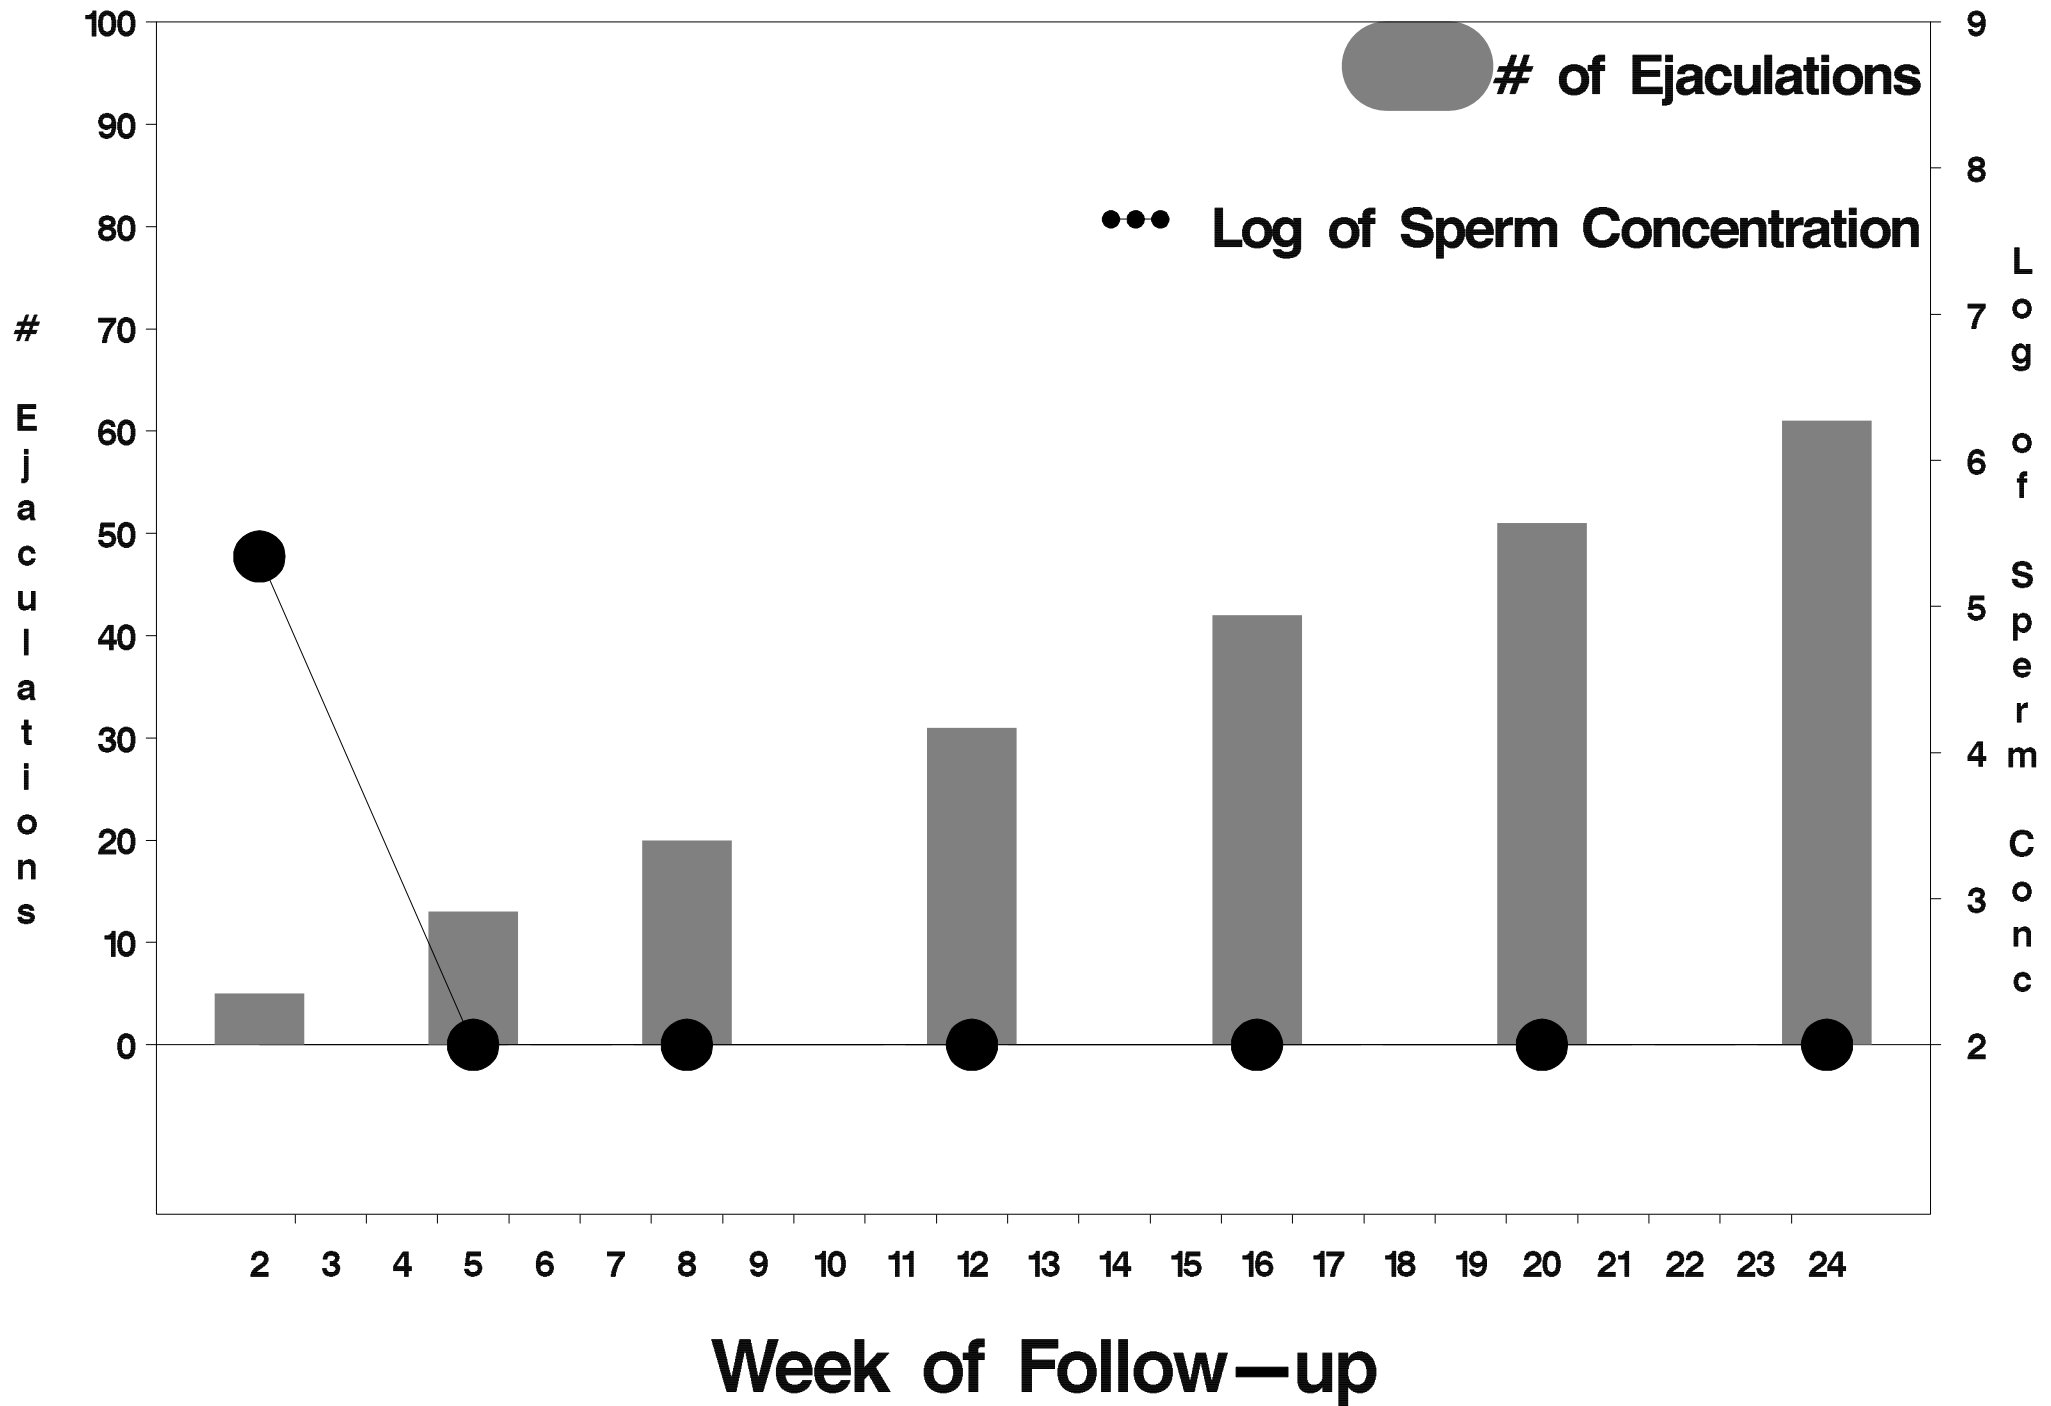



# Participant number= 731

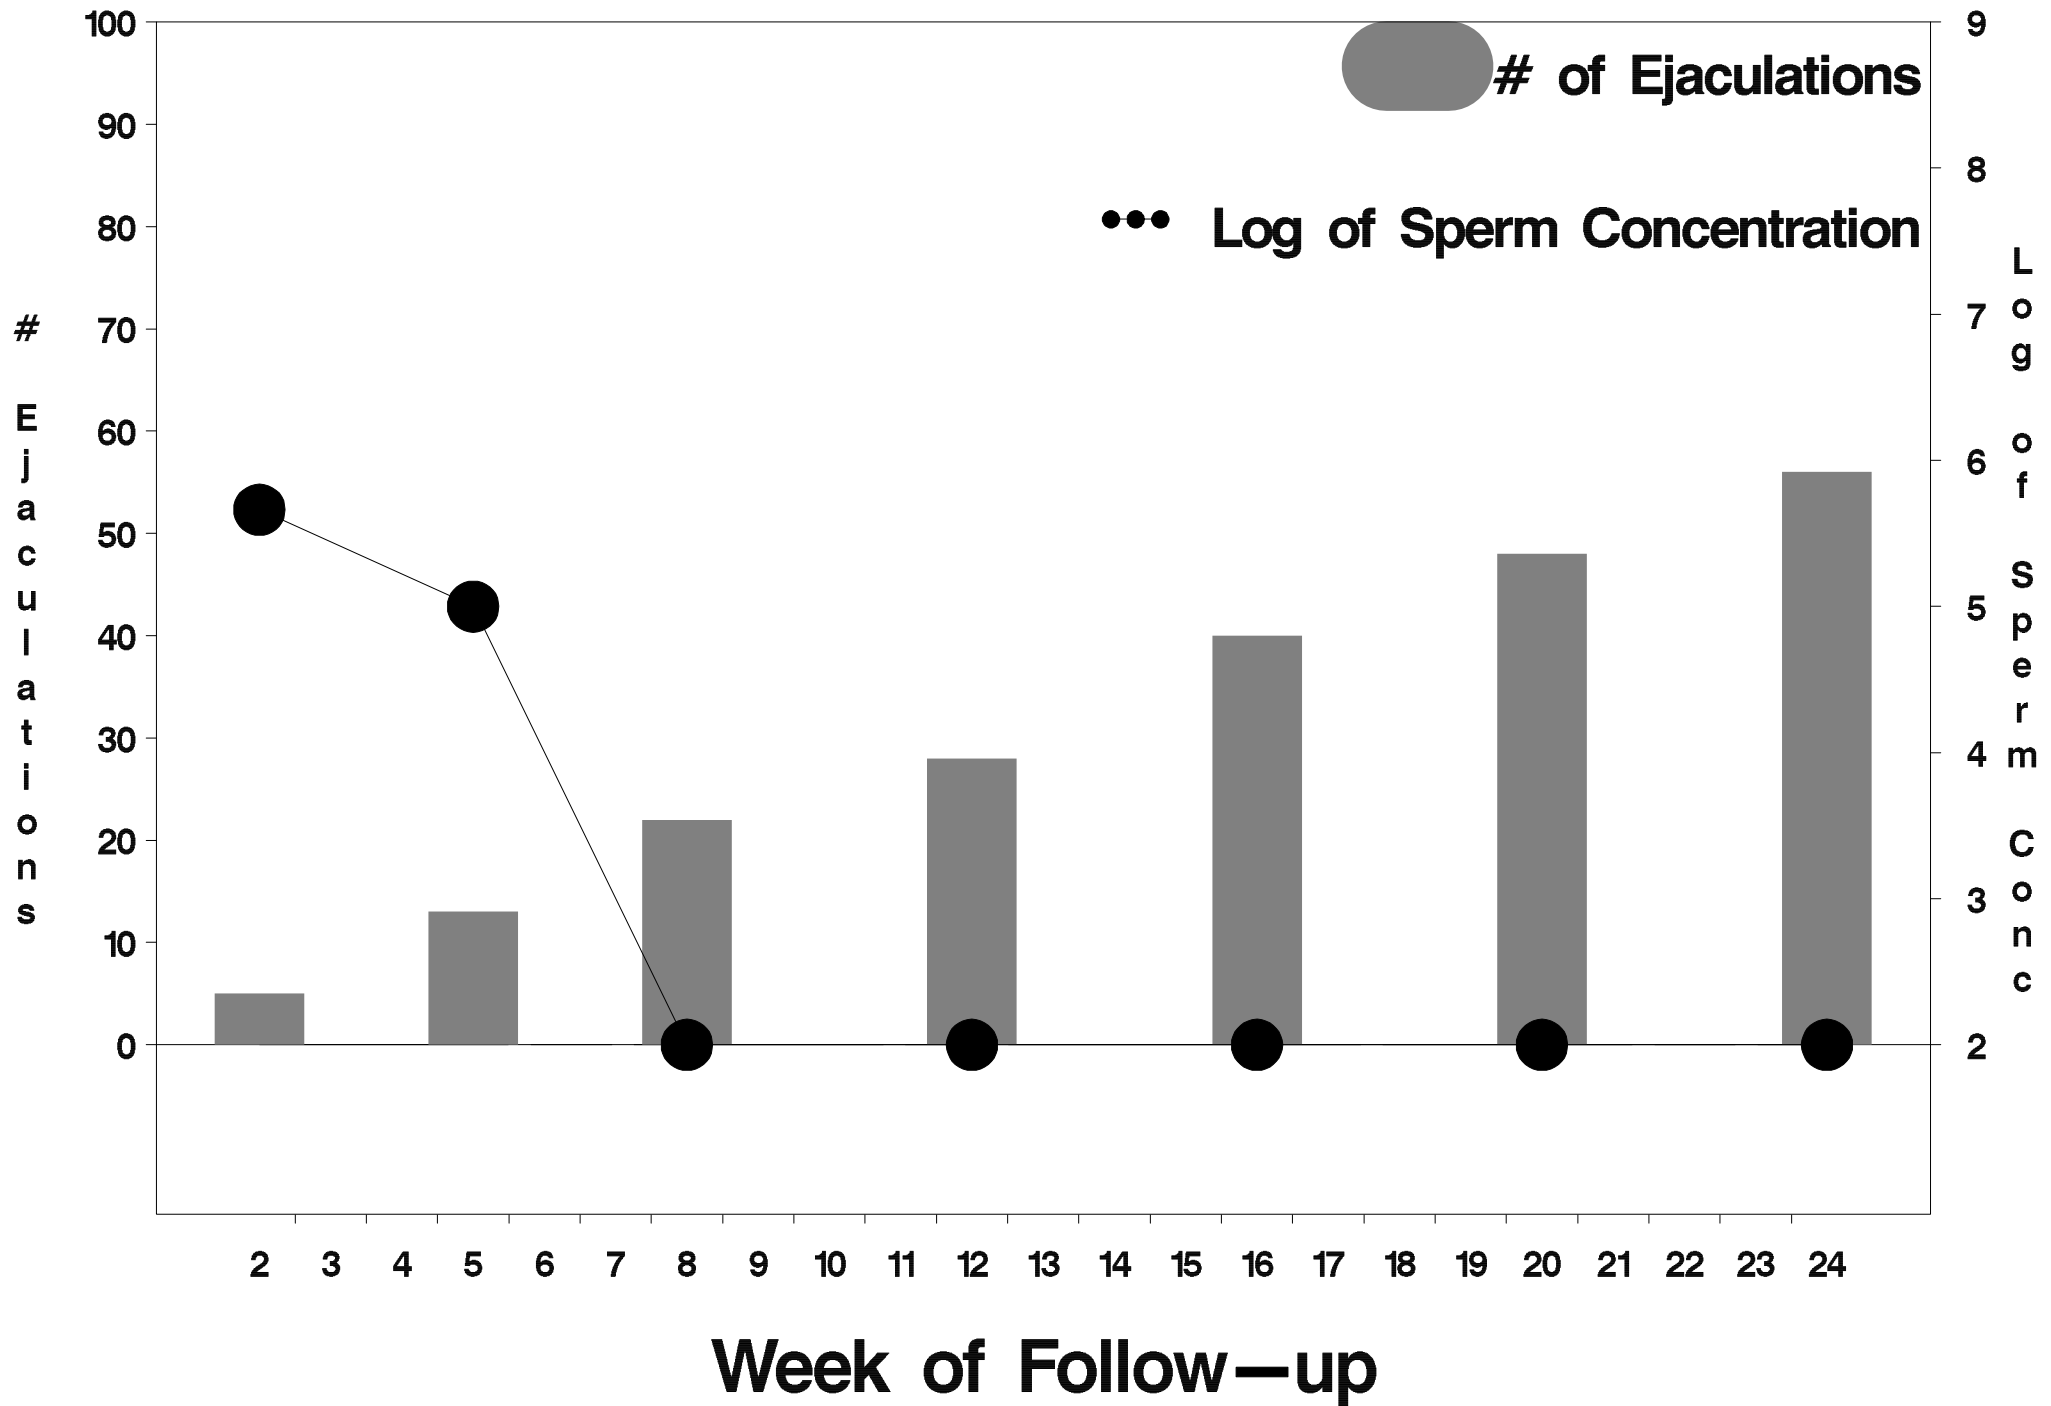

# Participant number= 732

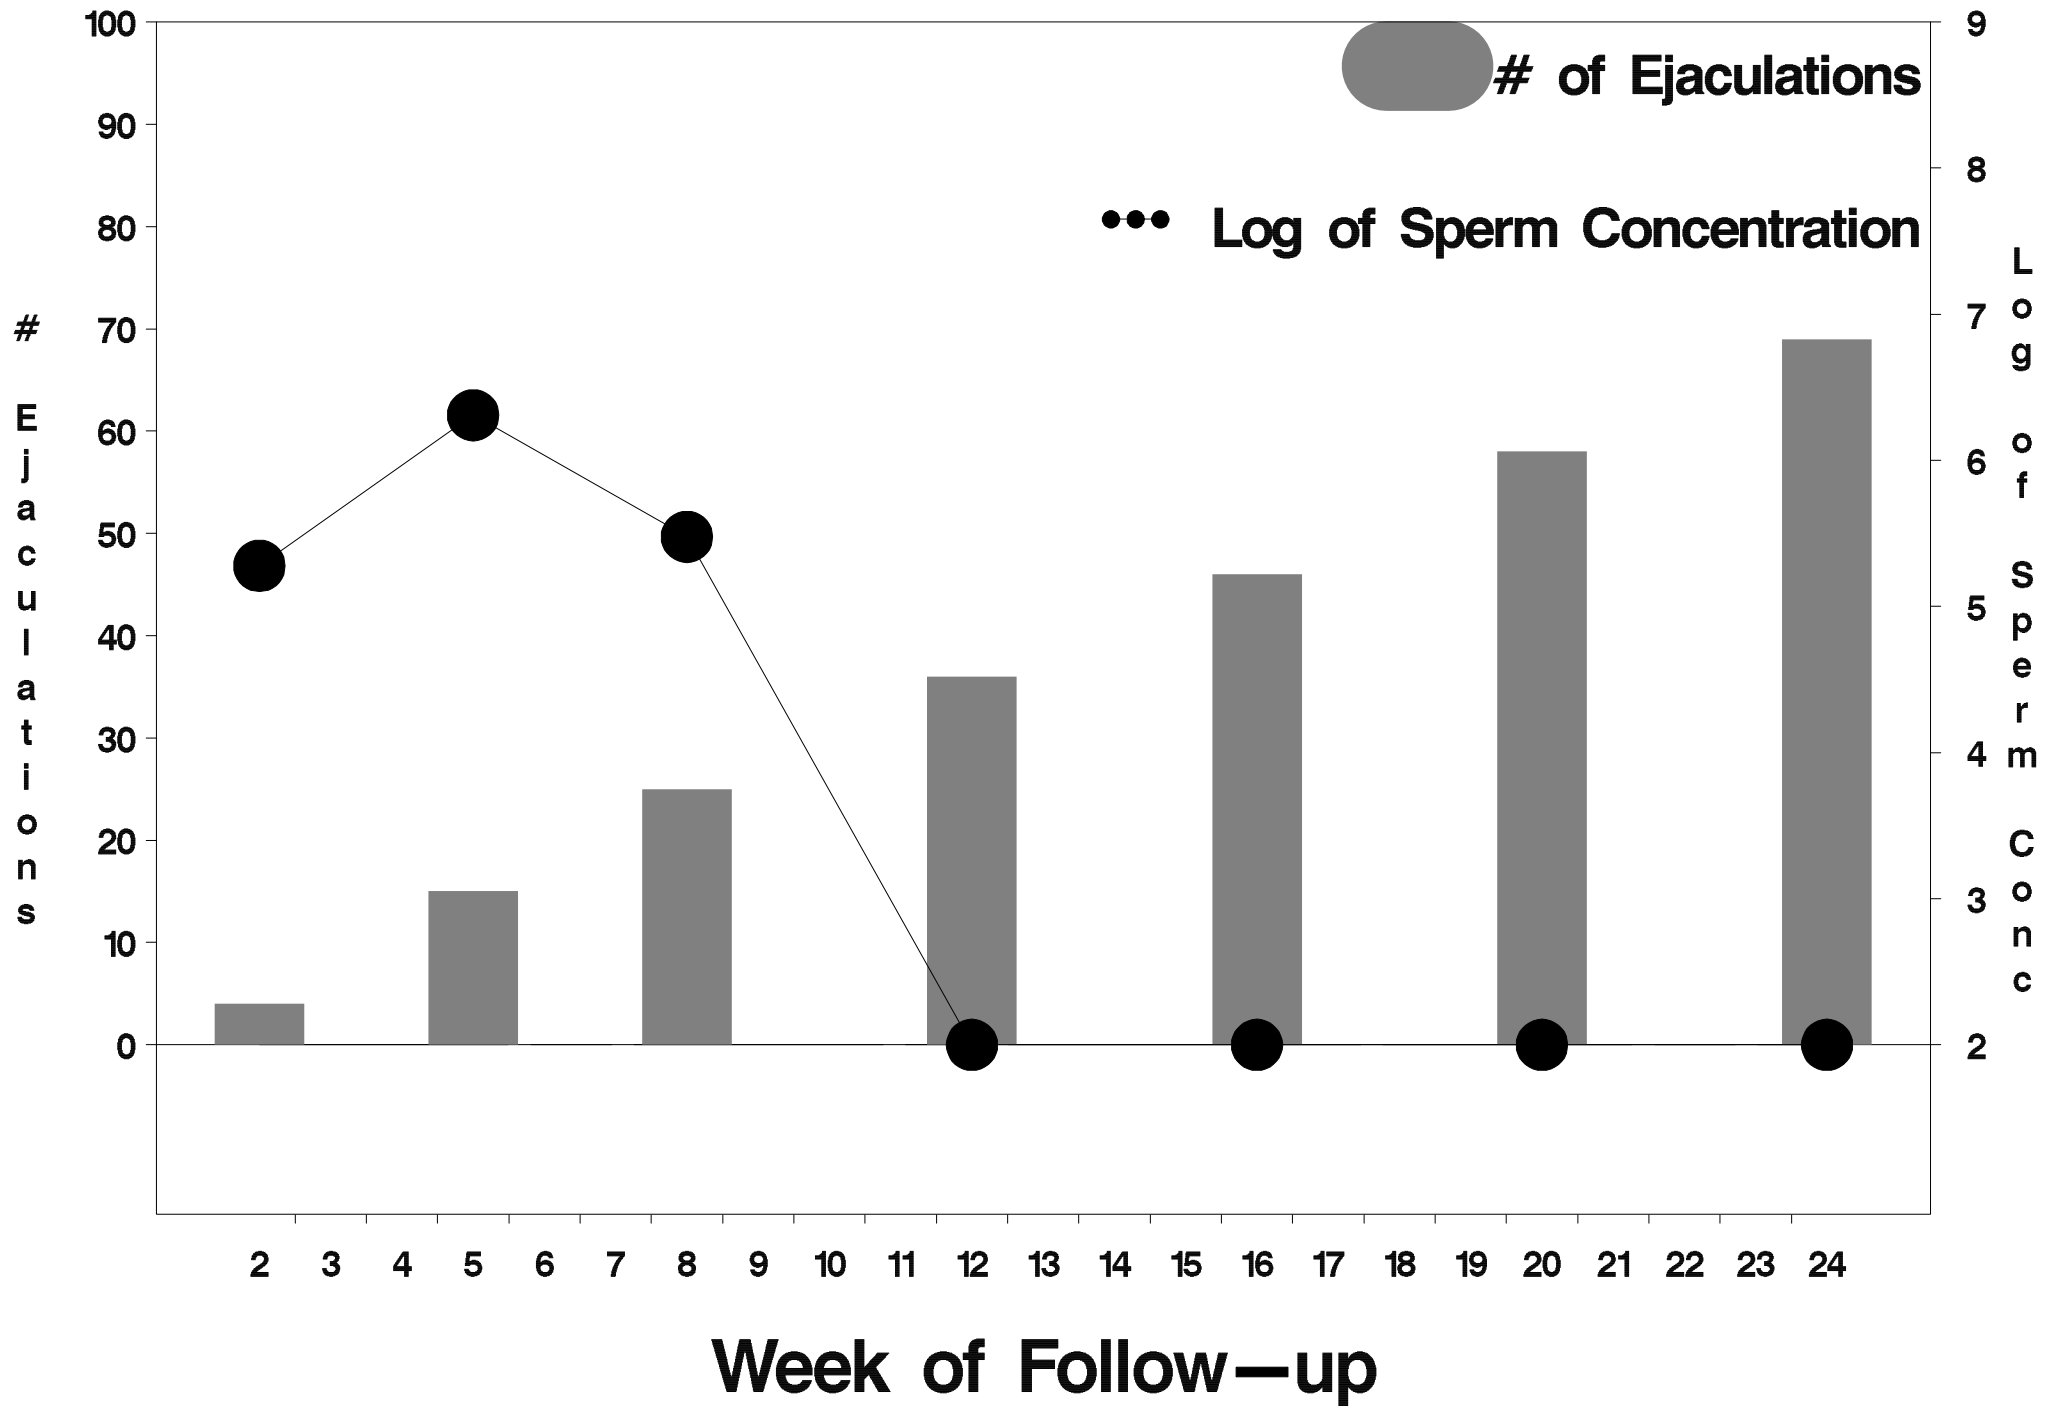

# Participant number= 733

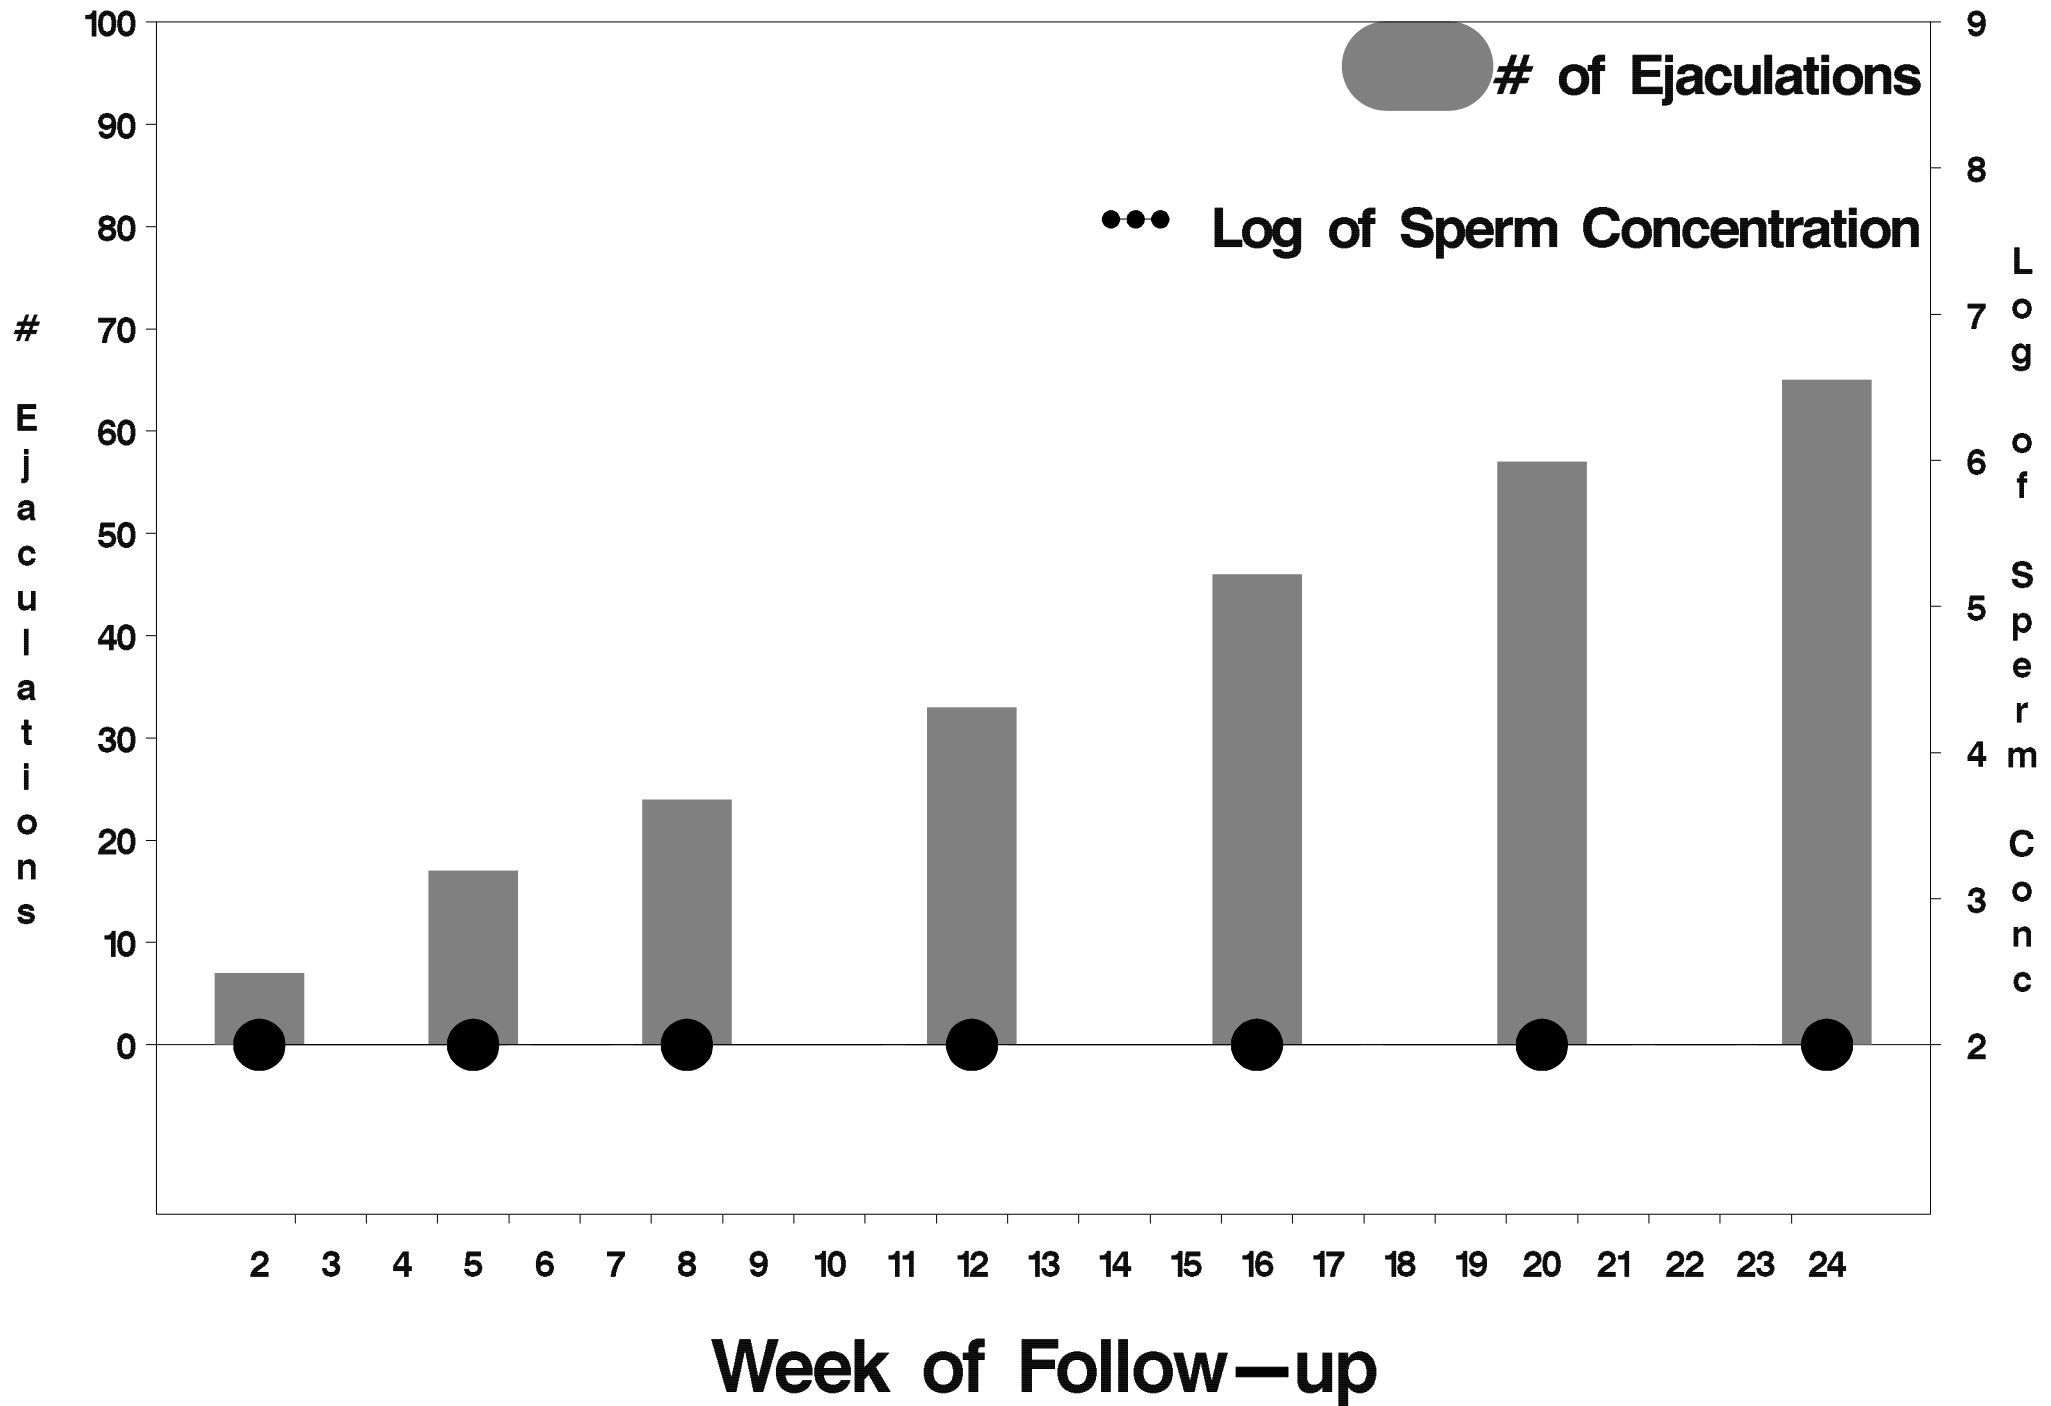

# Participant number= 734

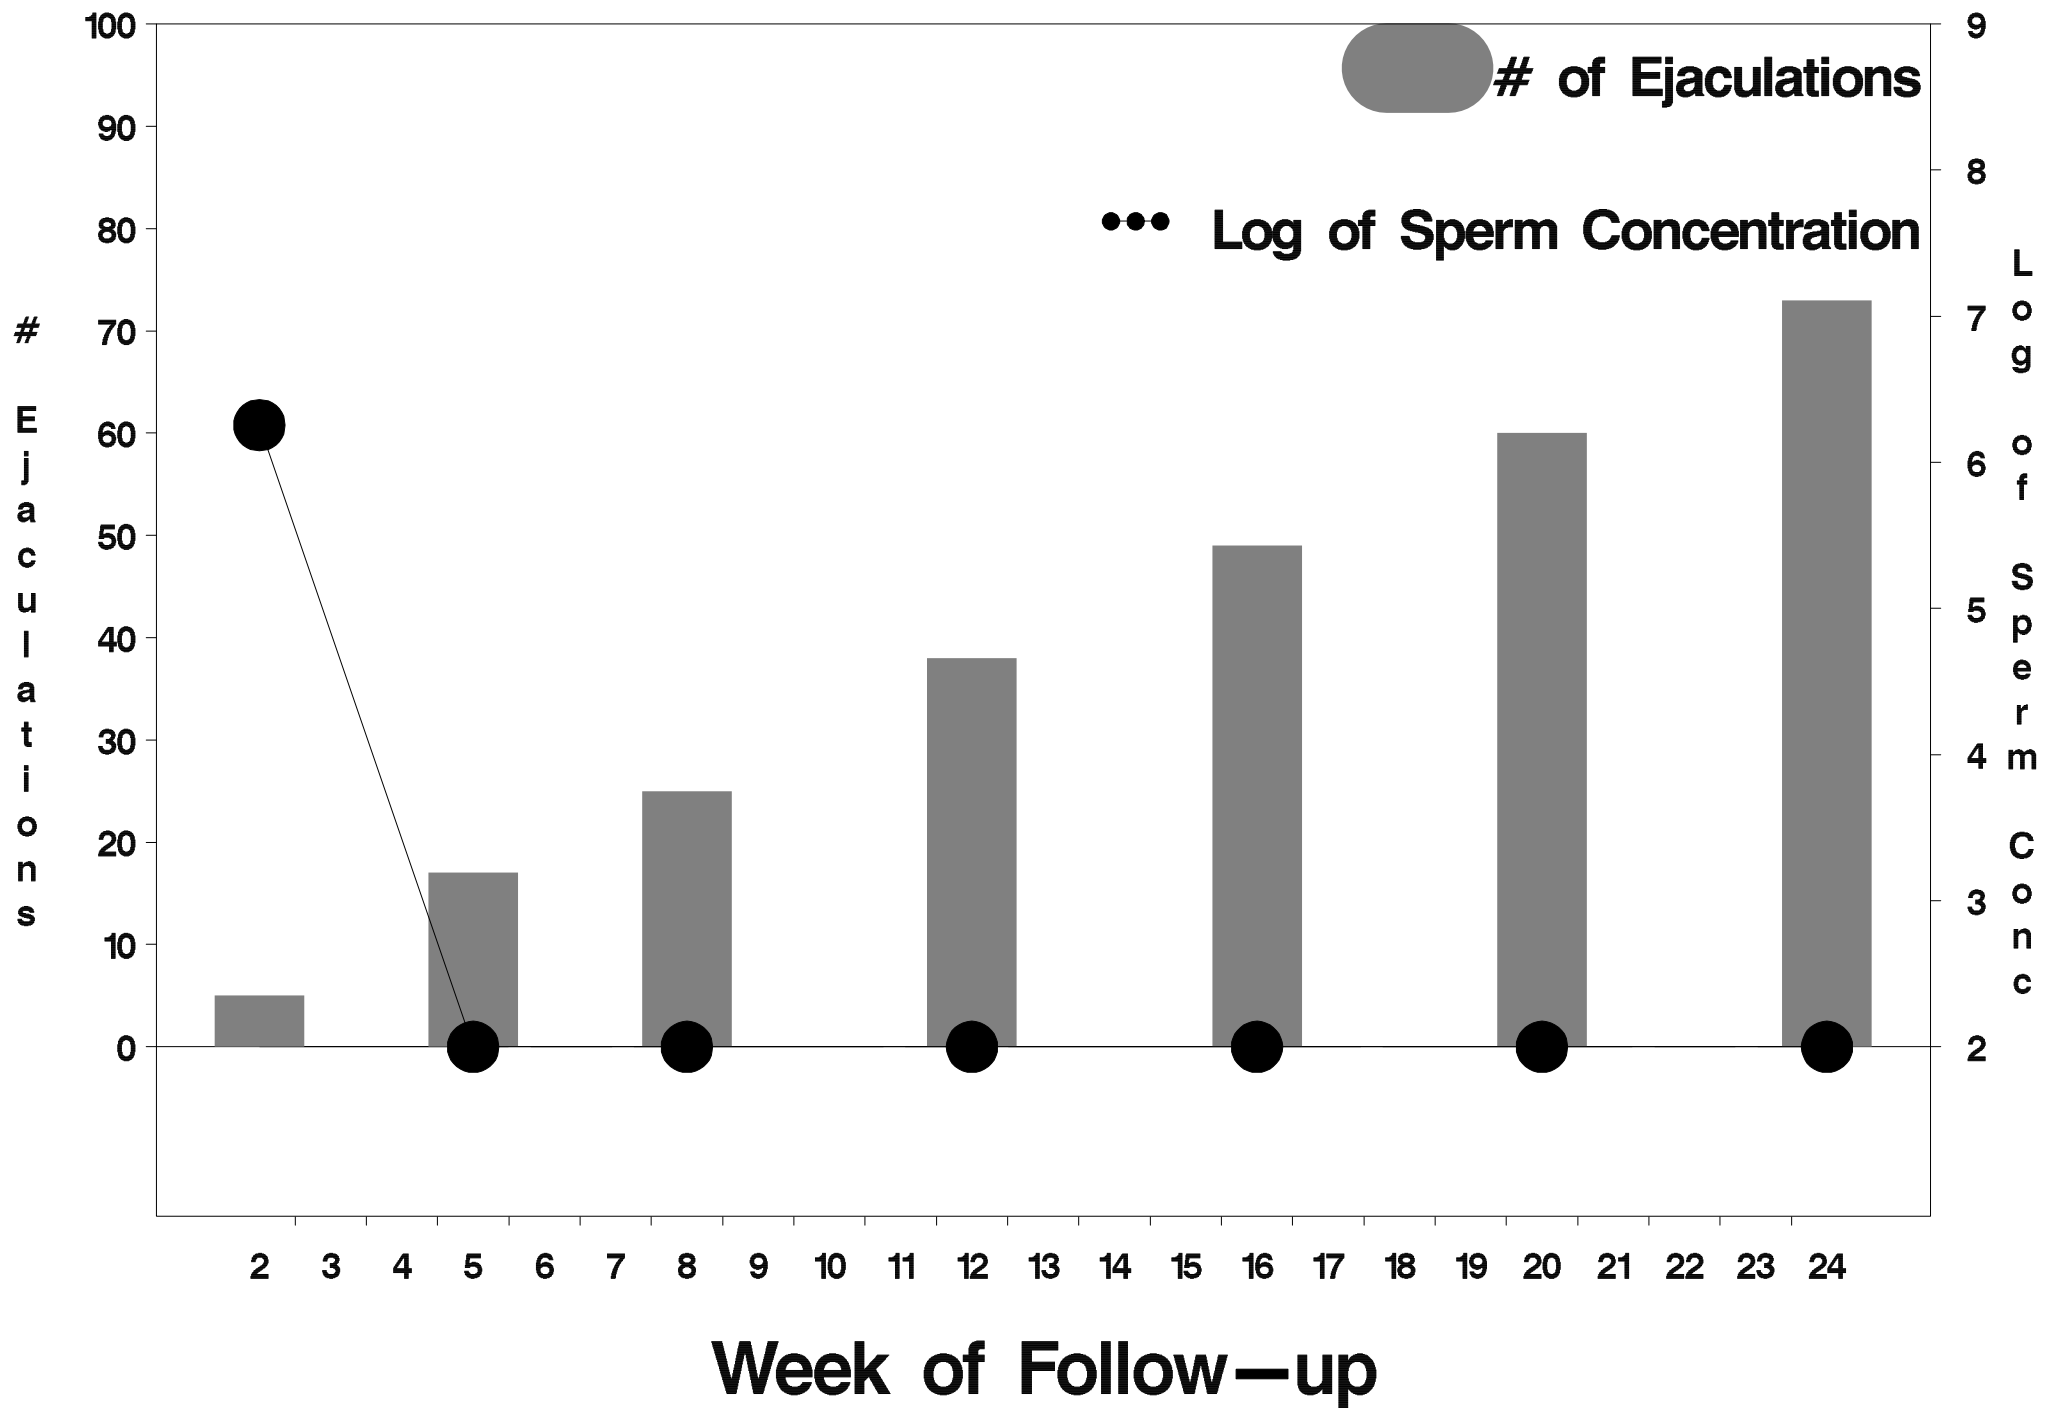

# Participant number= 735

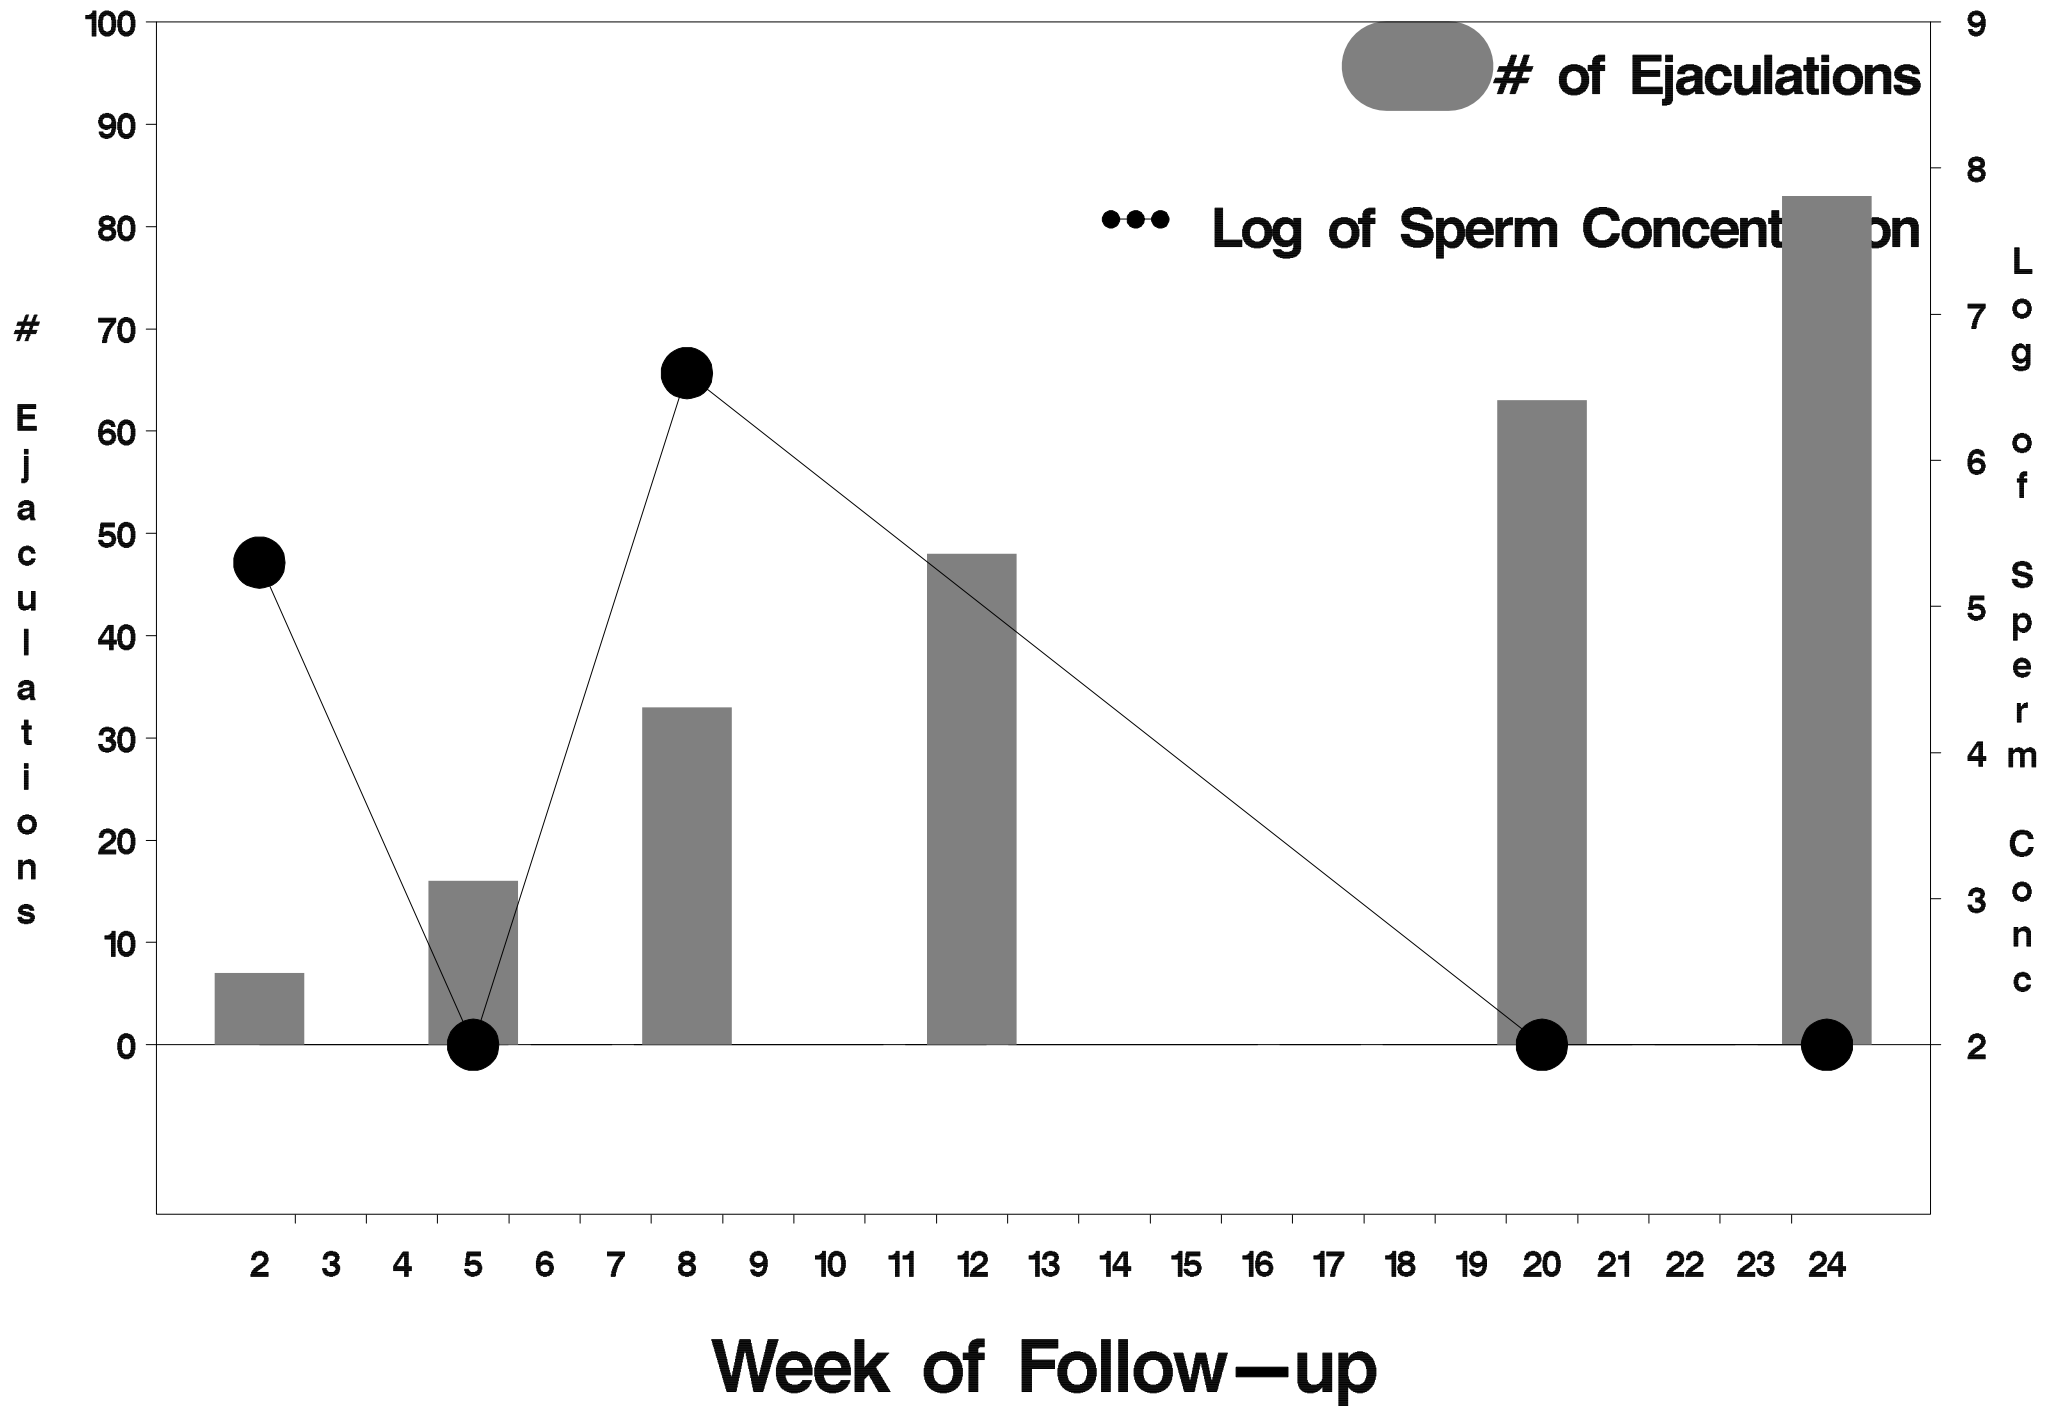

# Participant number= 736

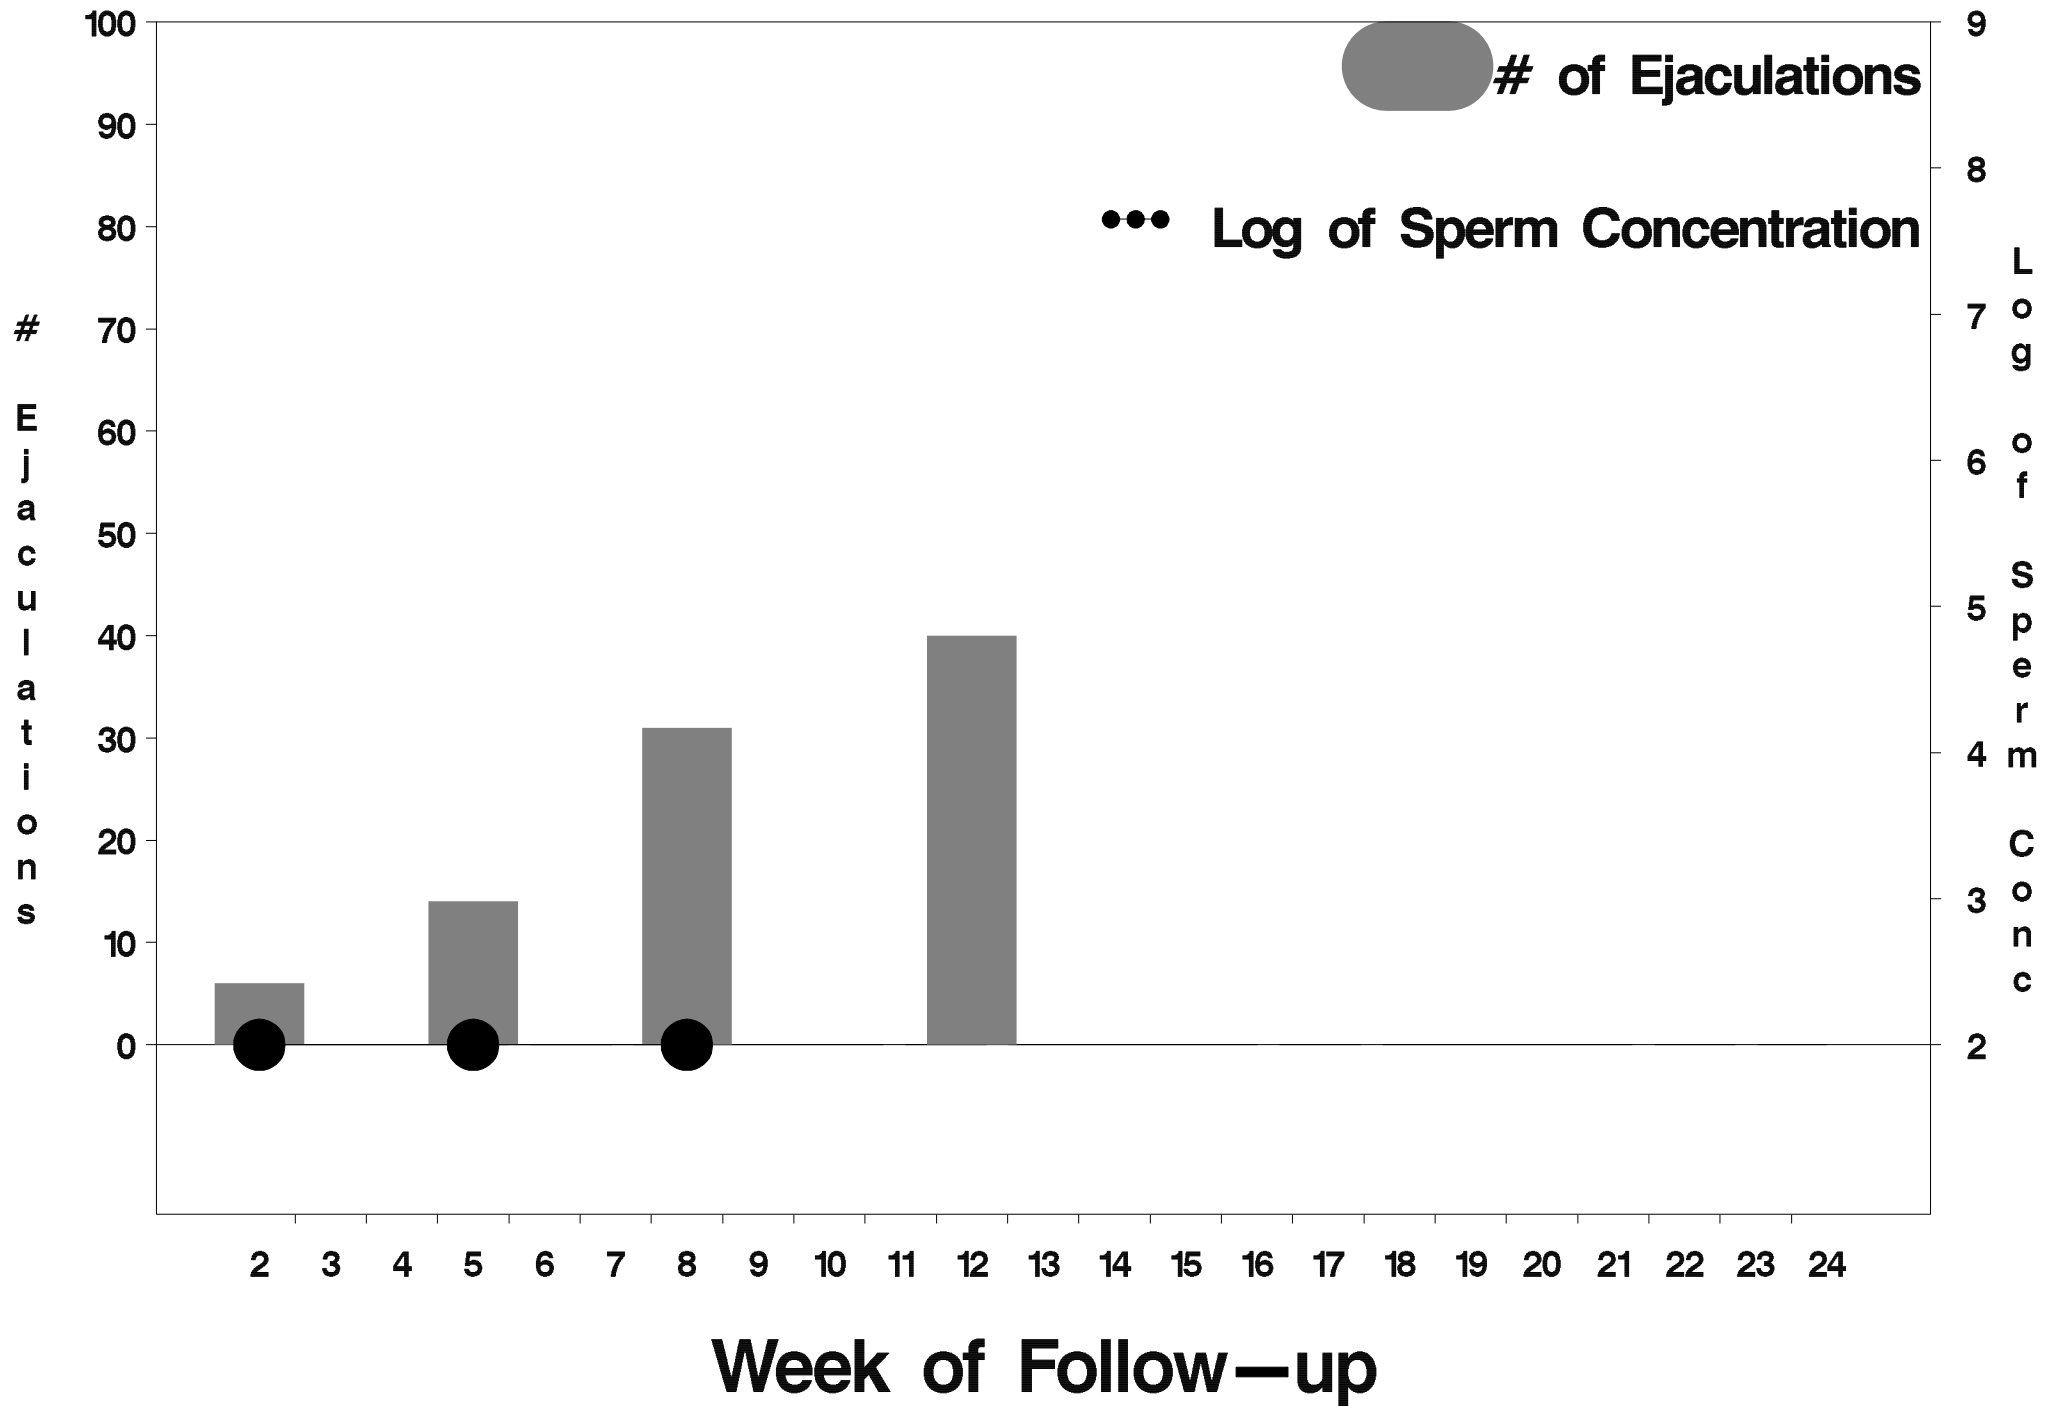

# Participant number= 737

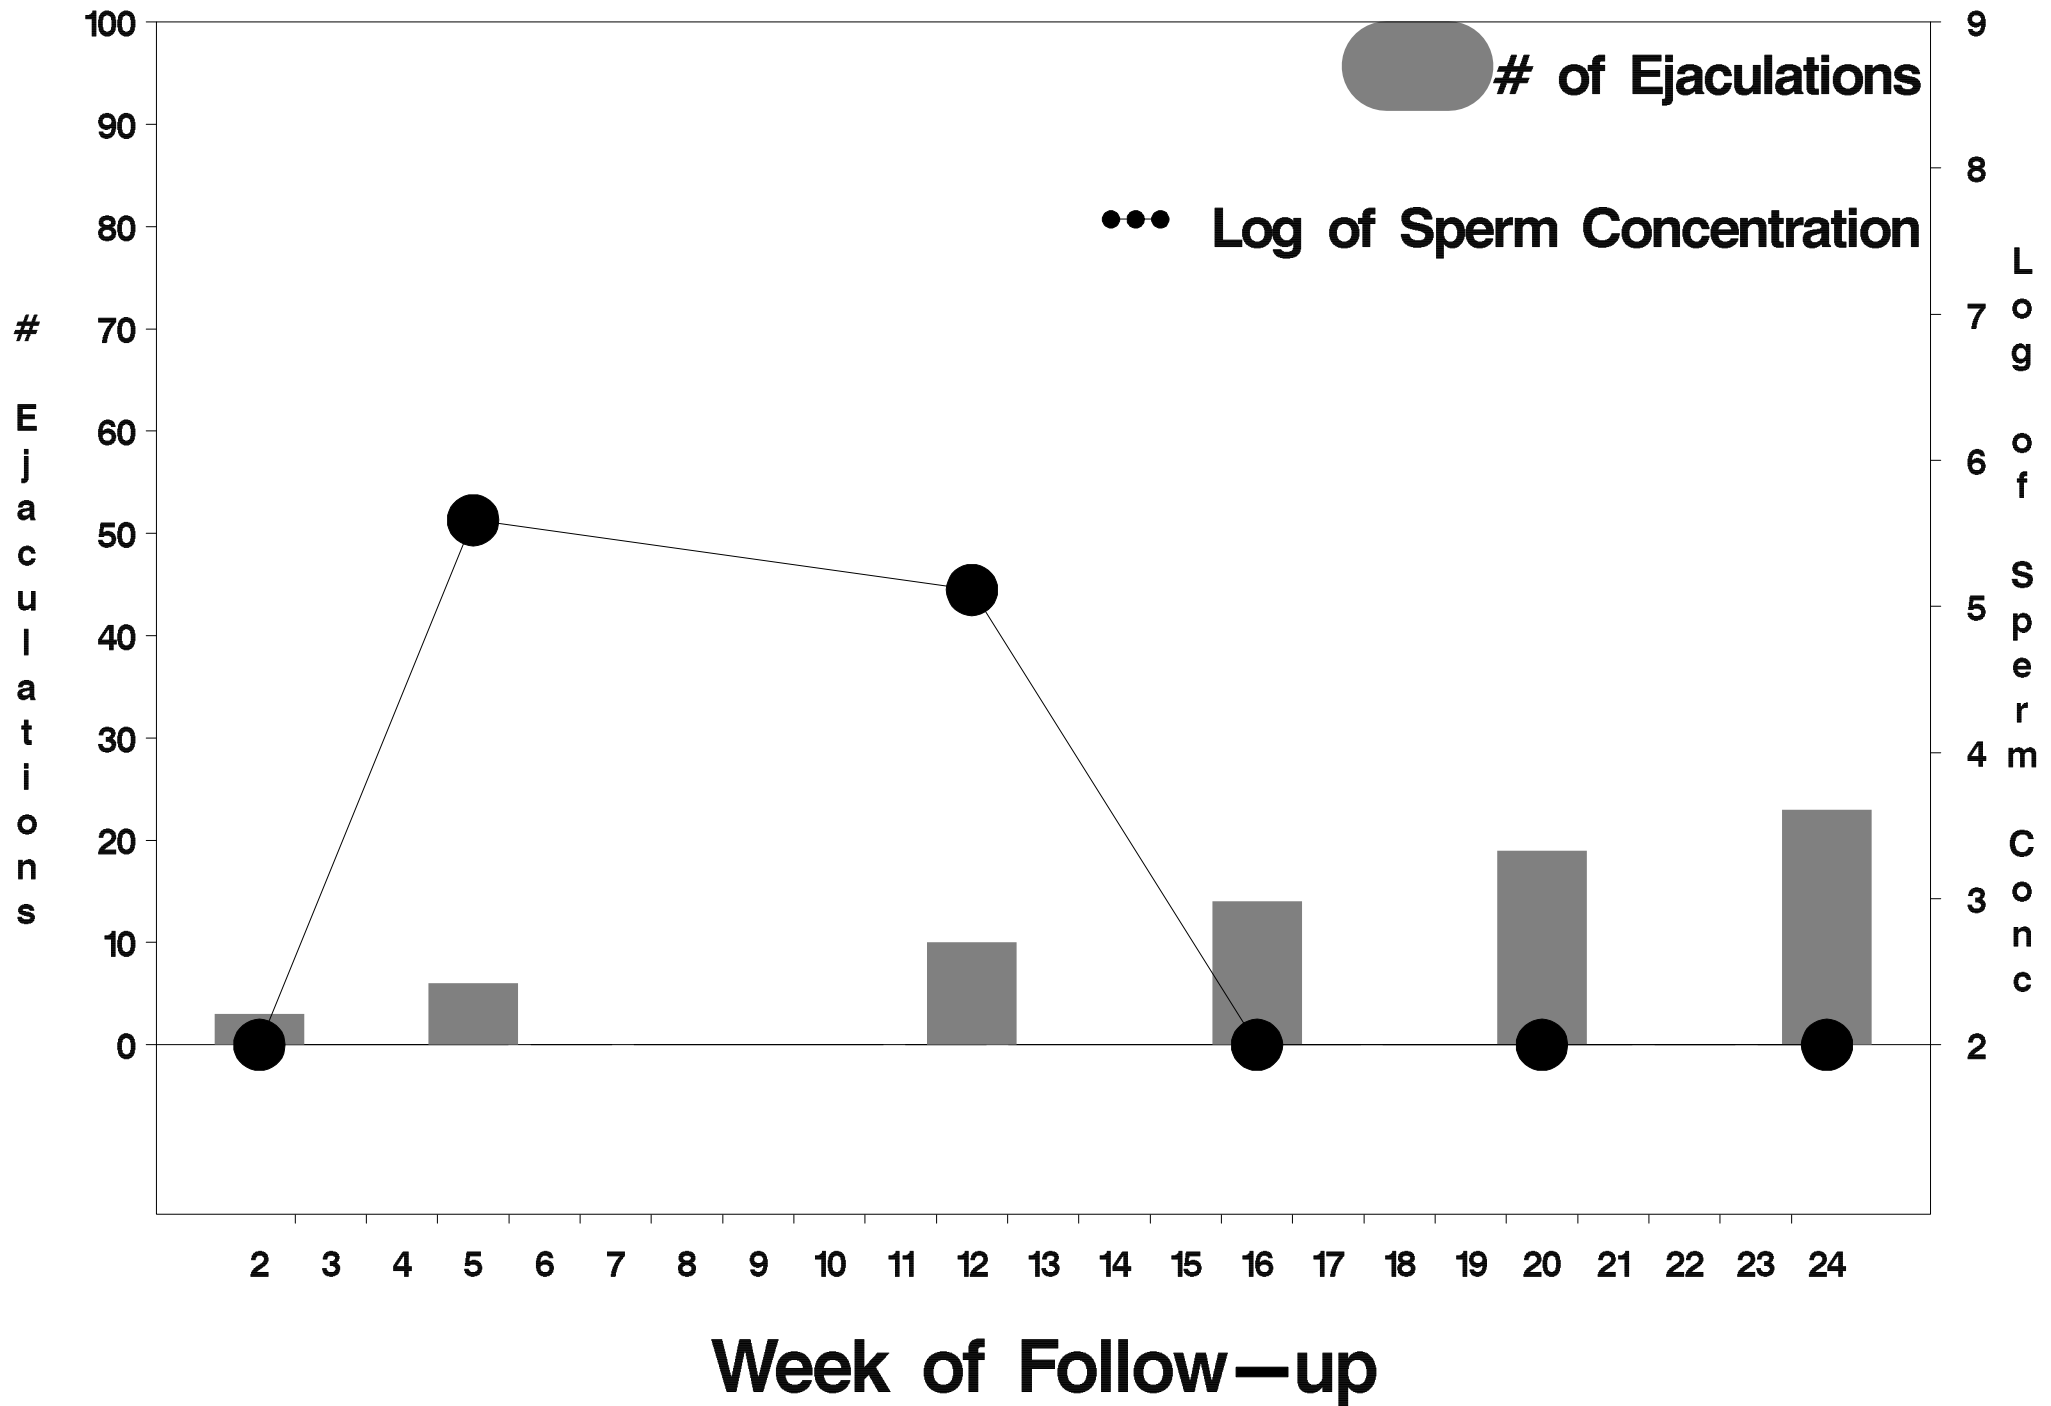

# Participant number= 738

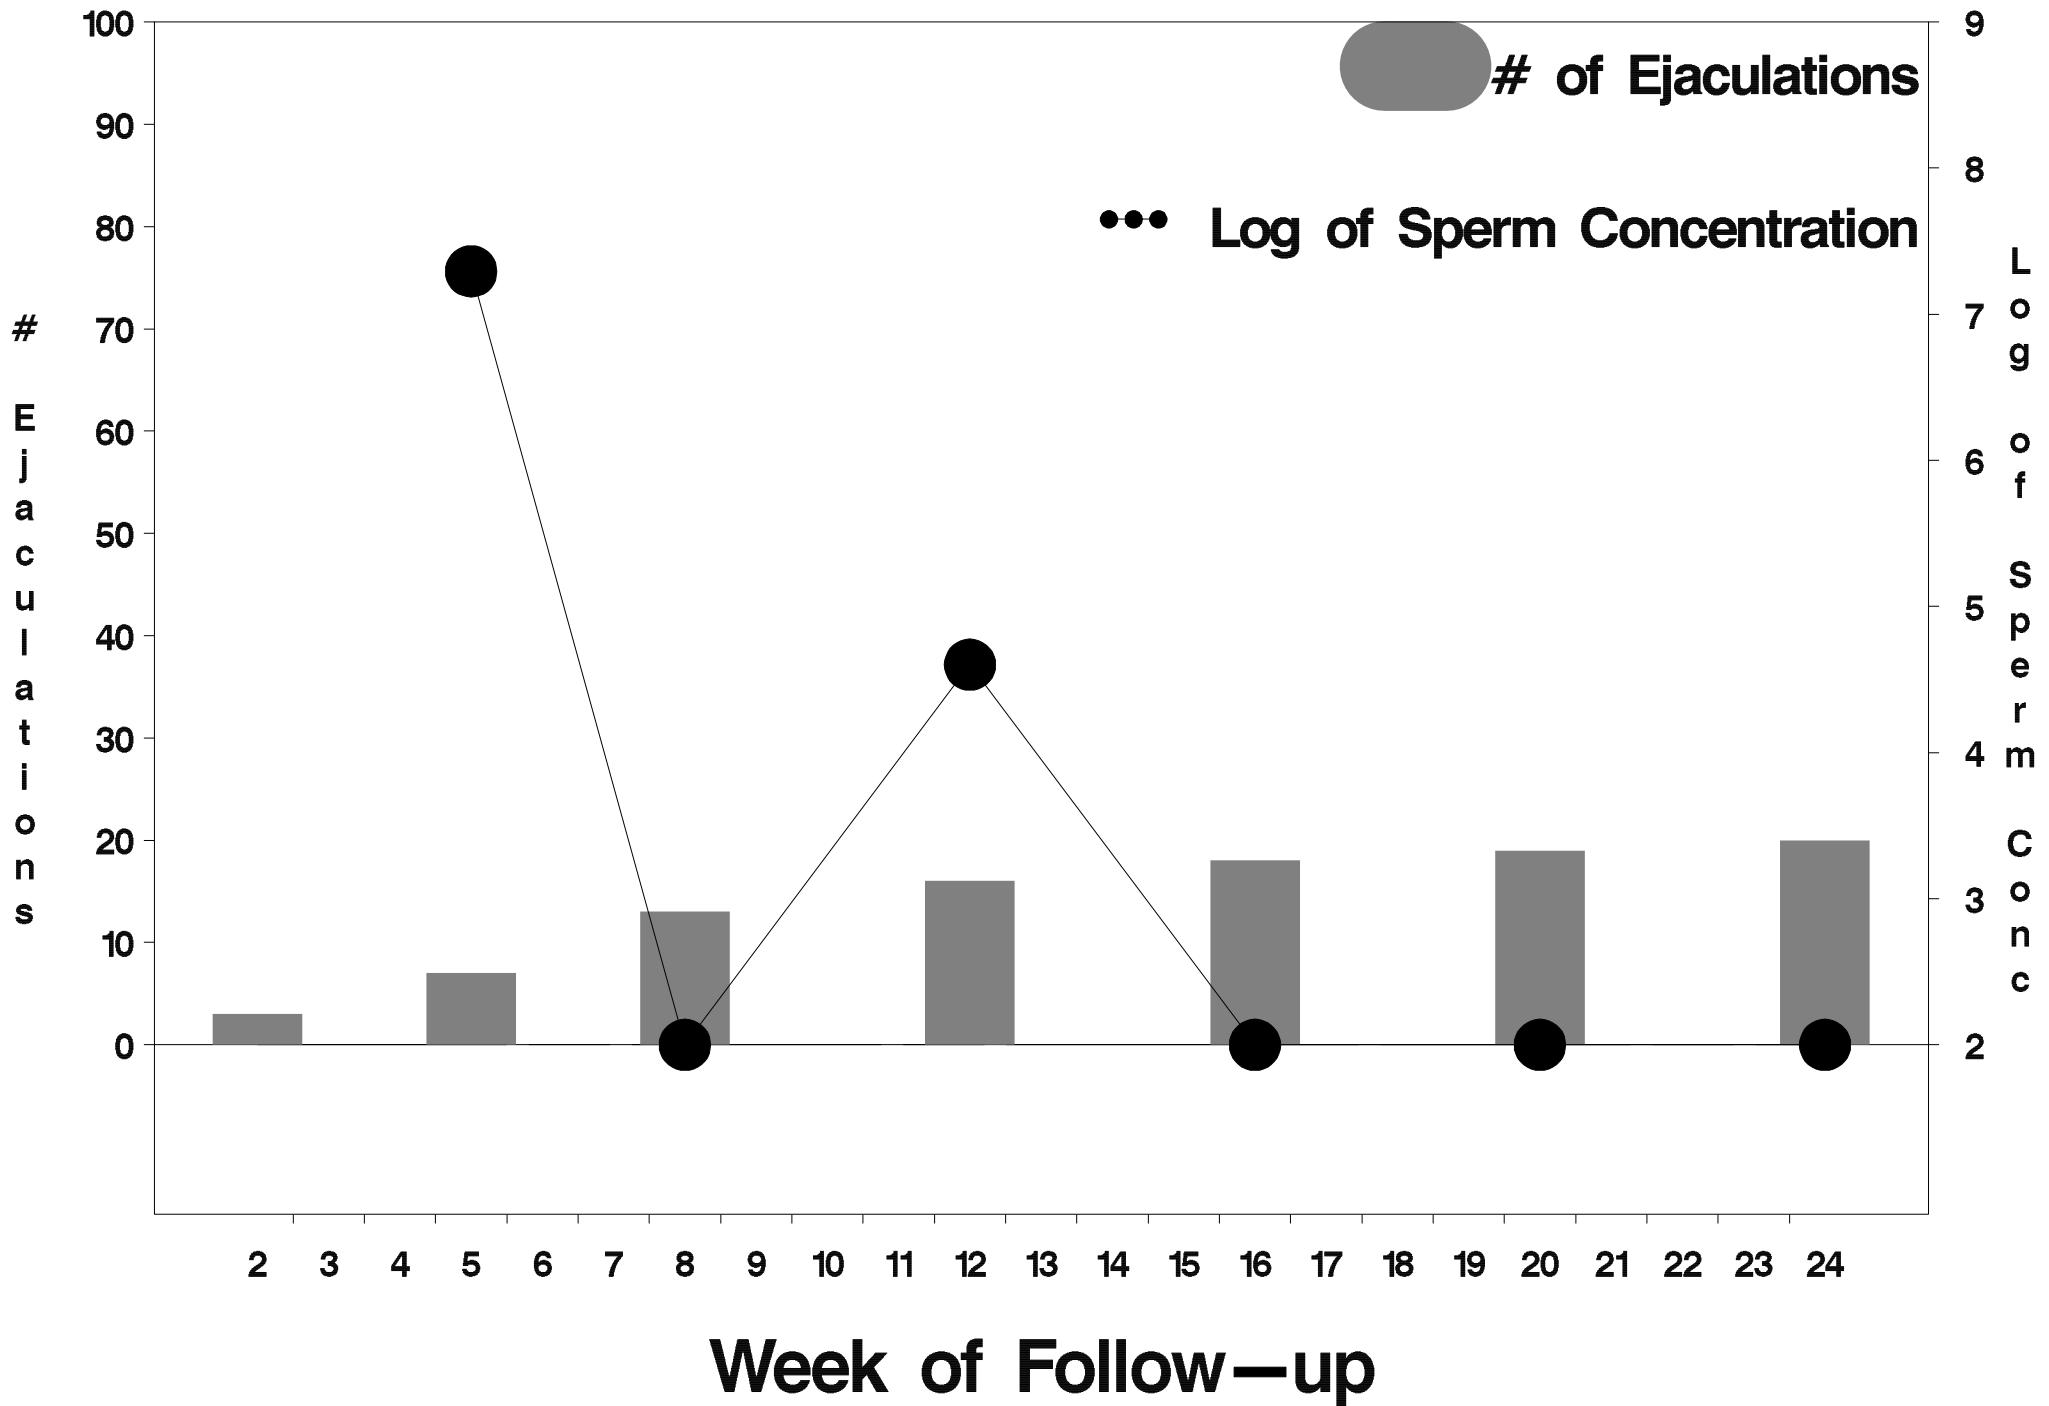



# Participant number= 739

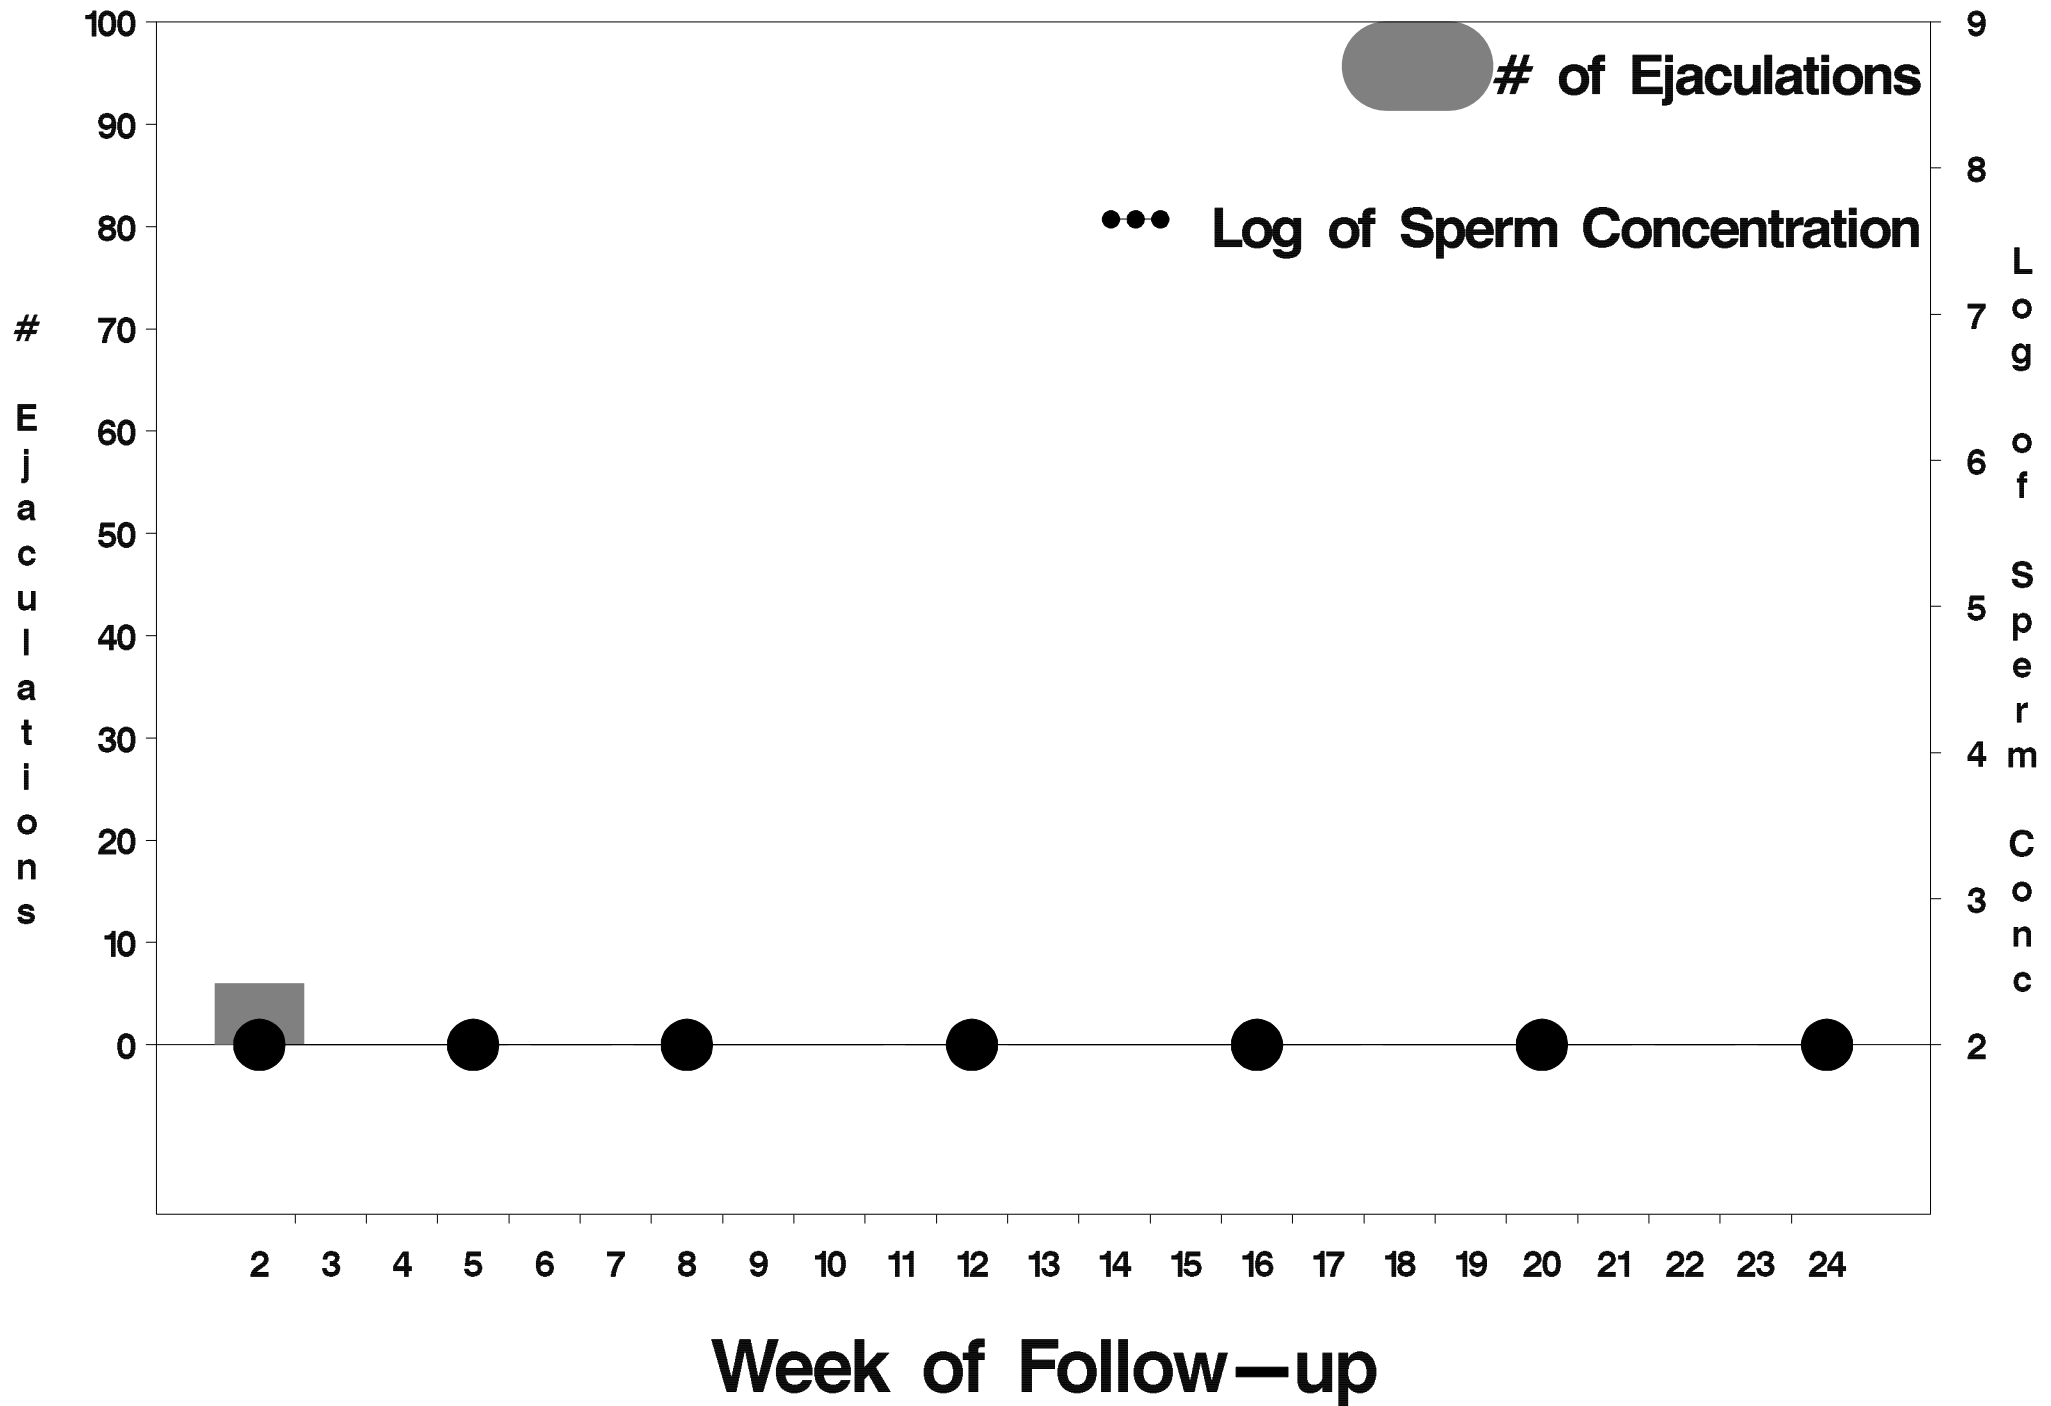

# Participant number= 740

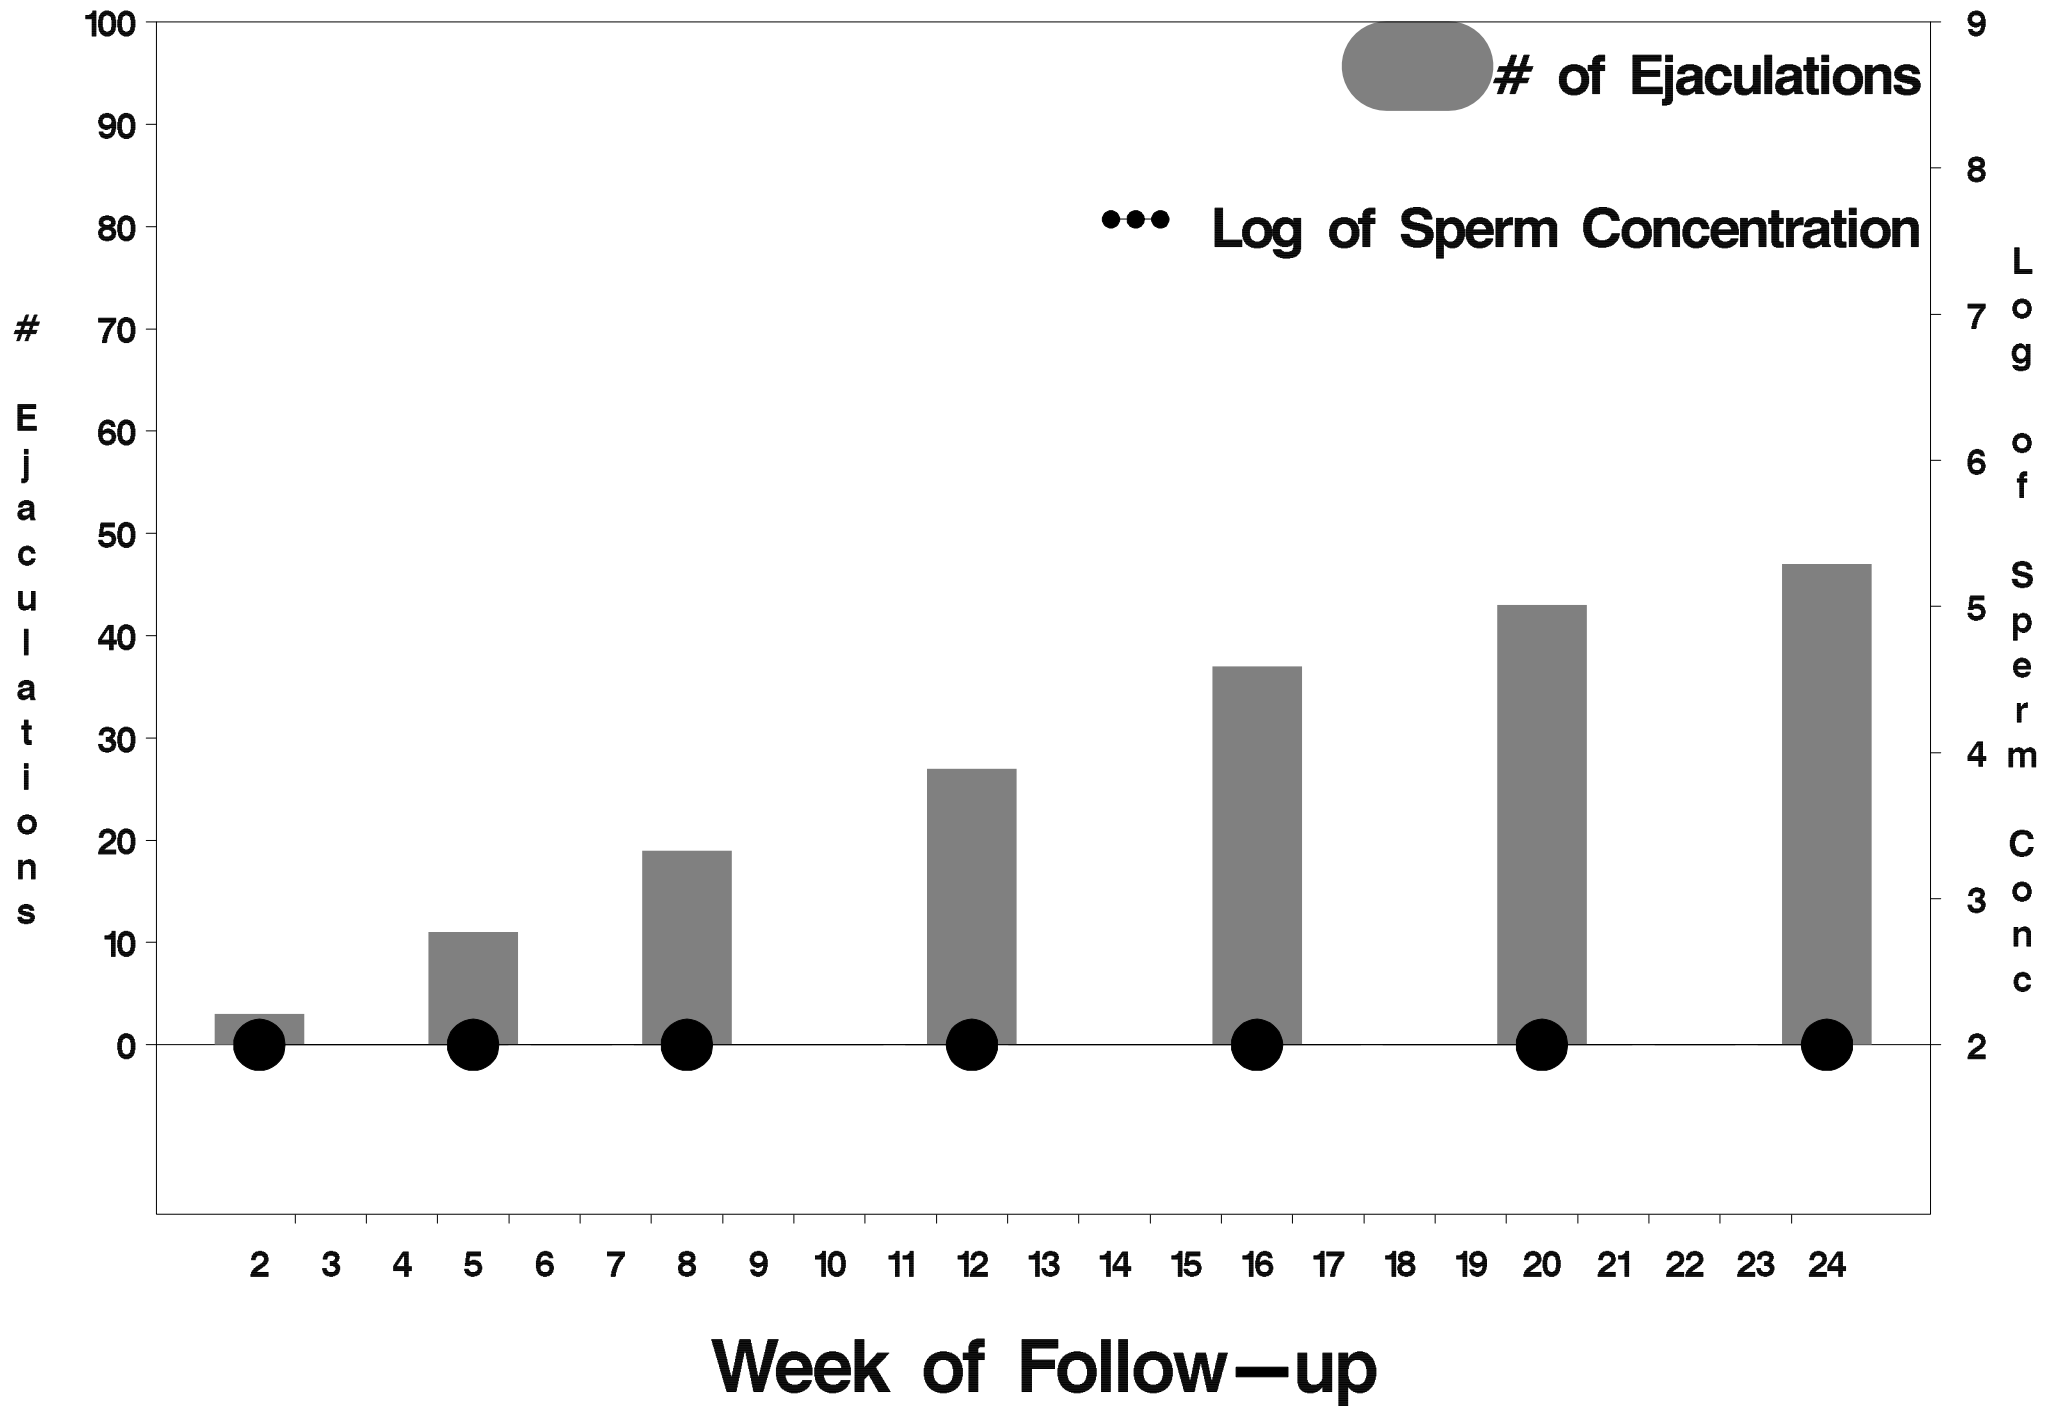

# Participant number= 741

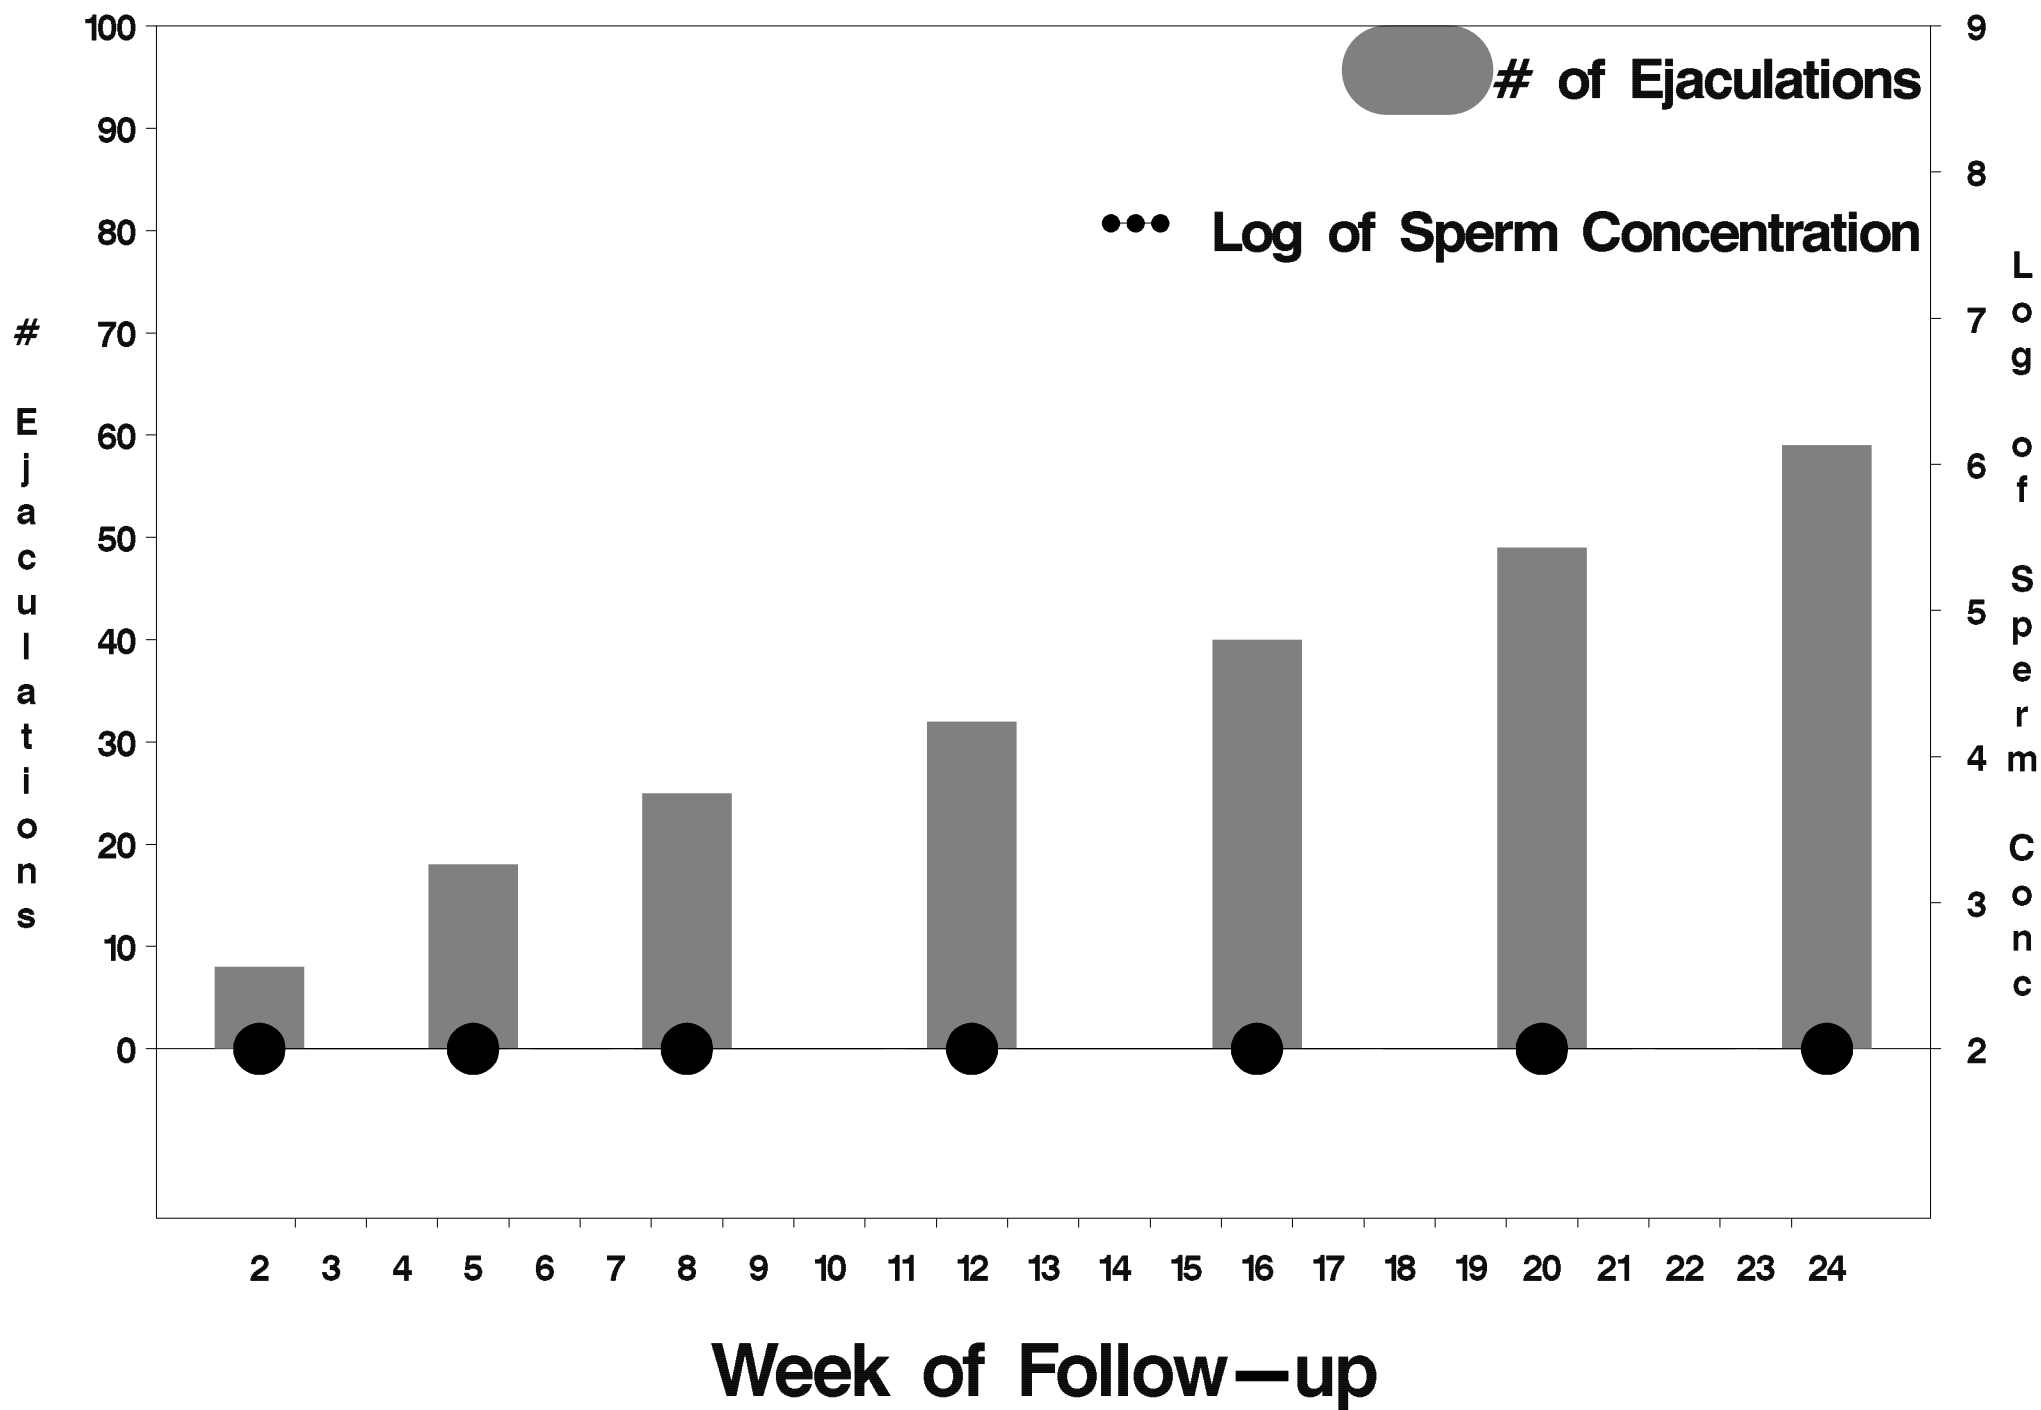

# Participant number= 742

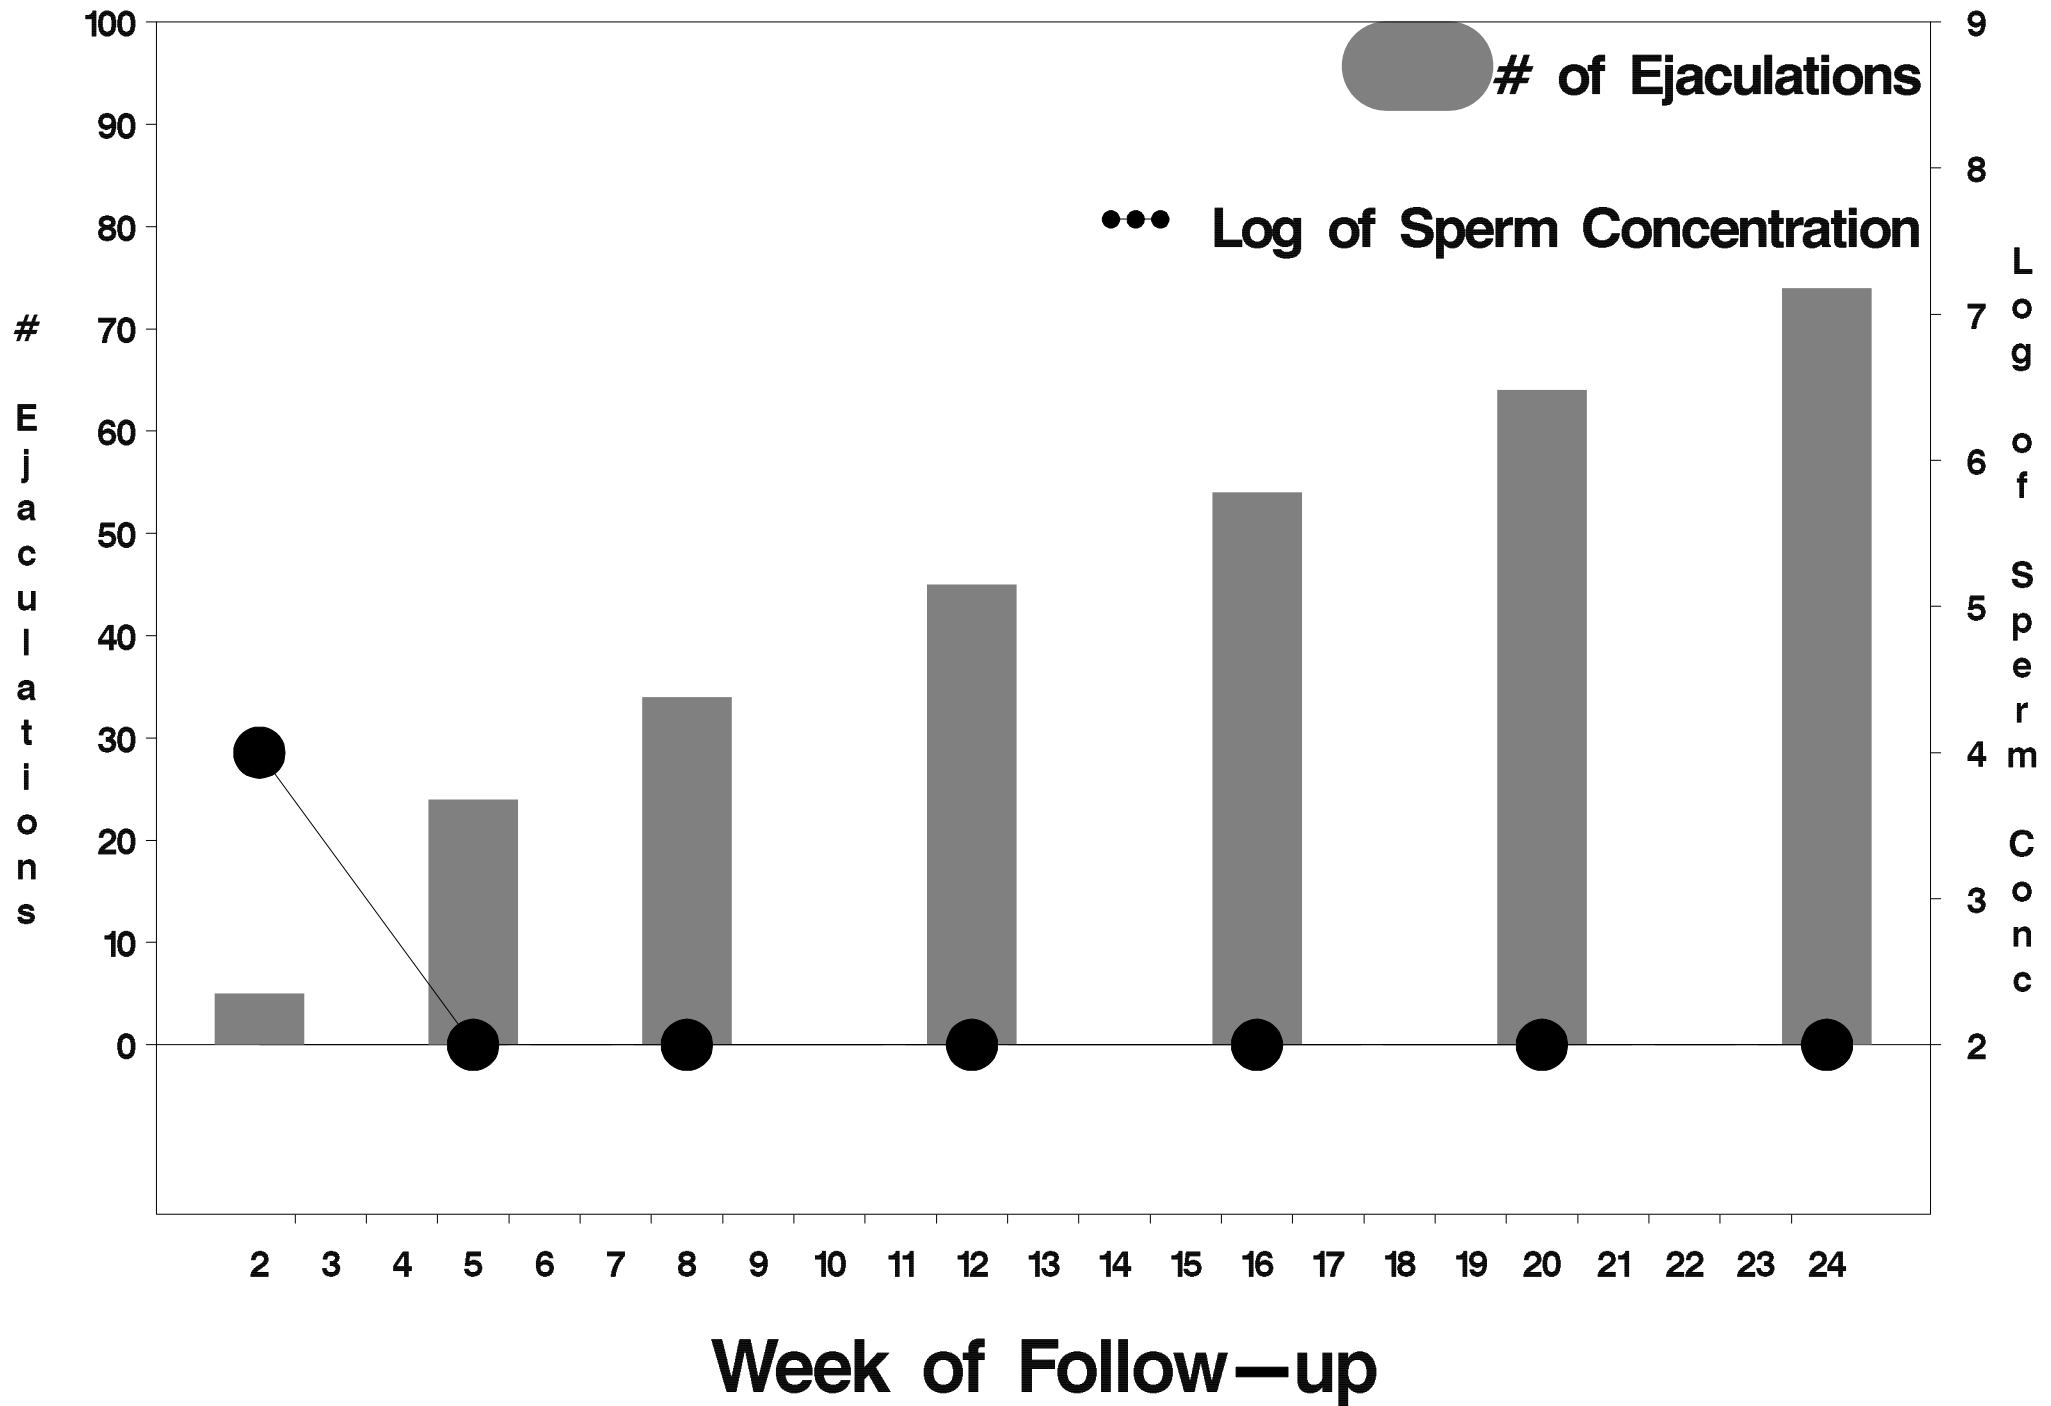

# Participant number= 743

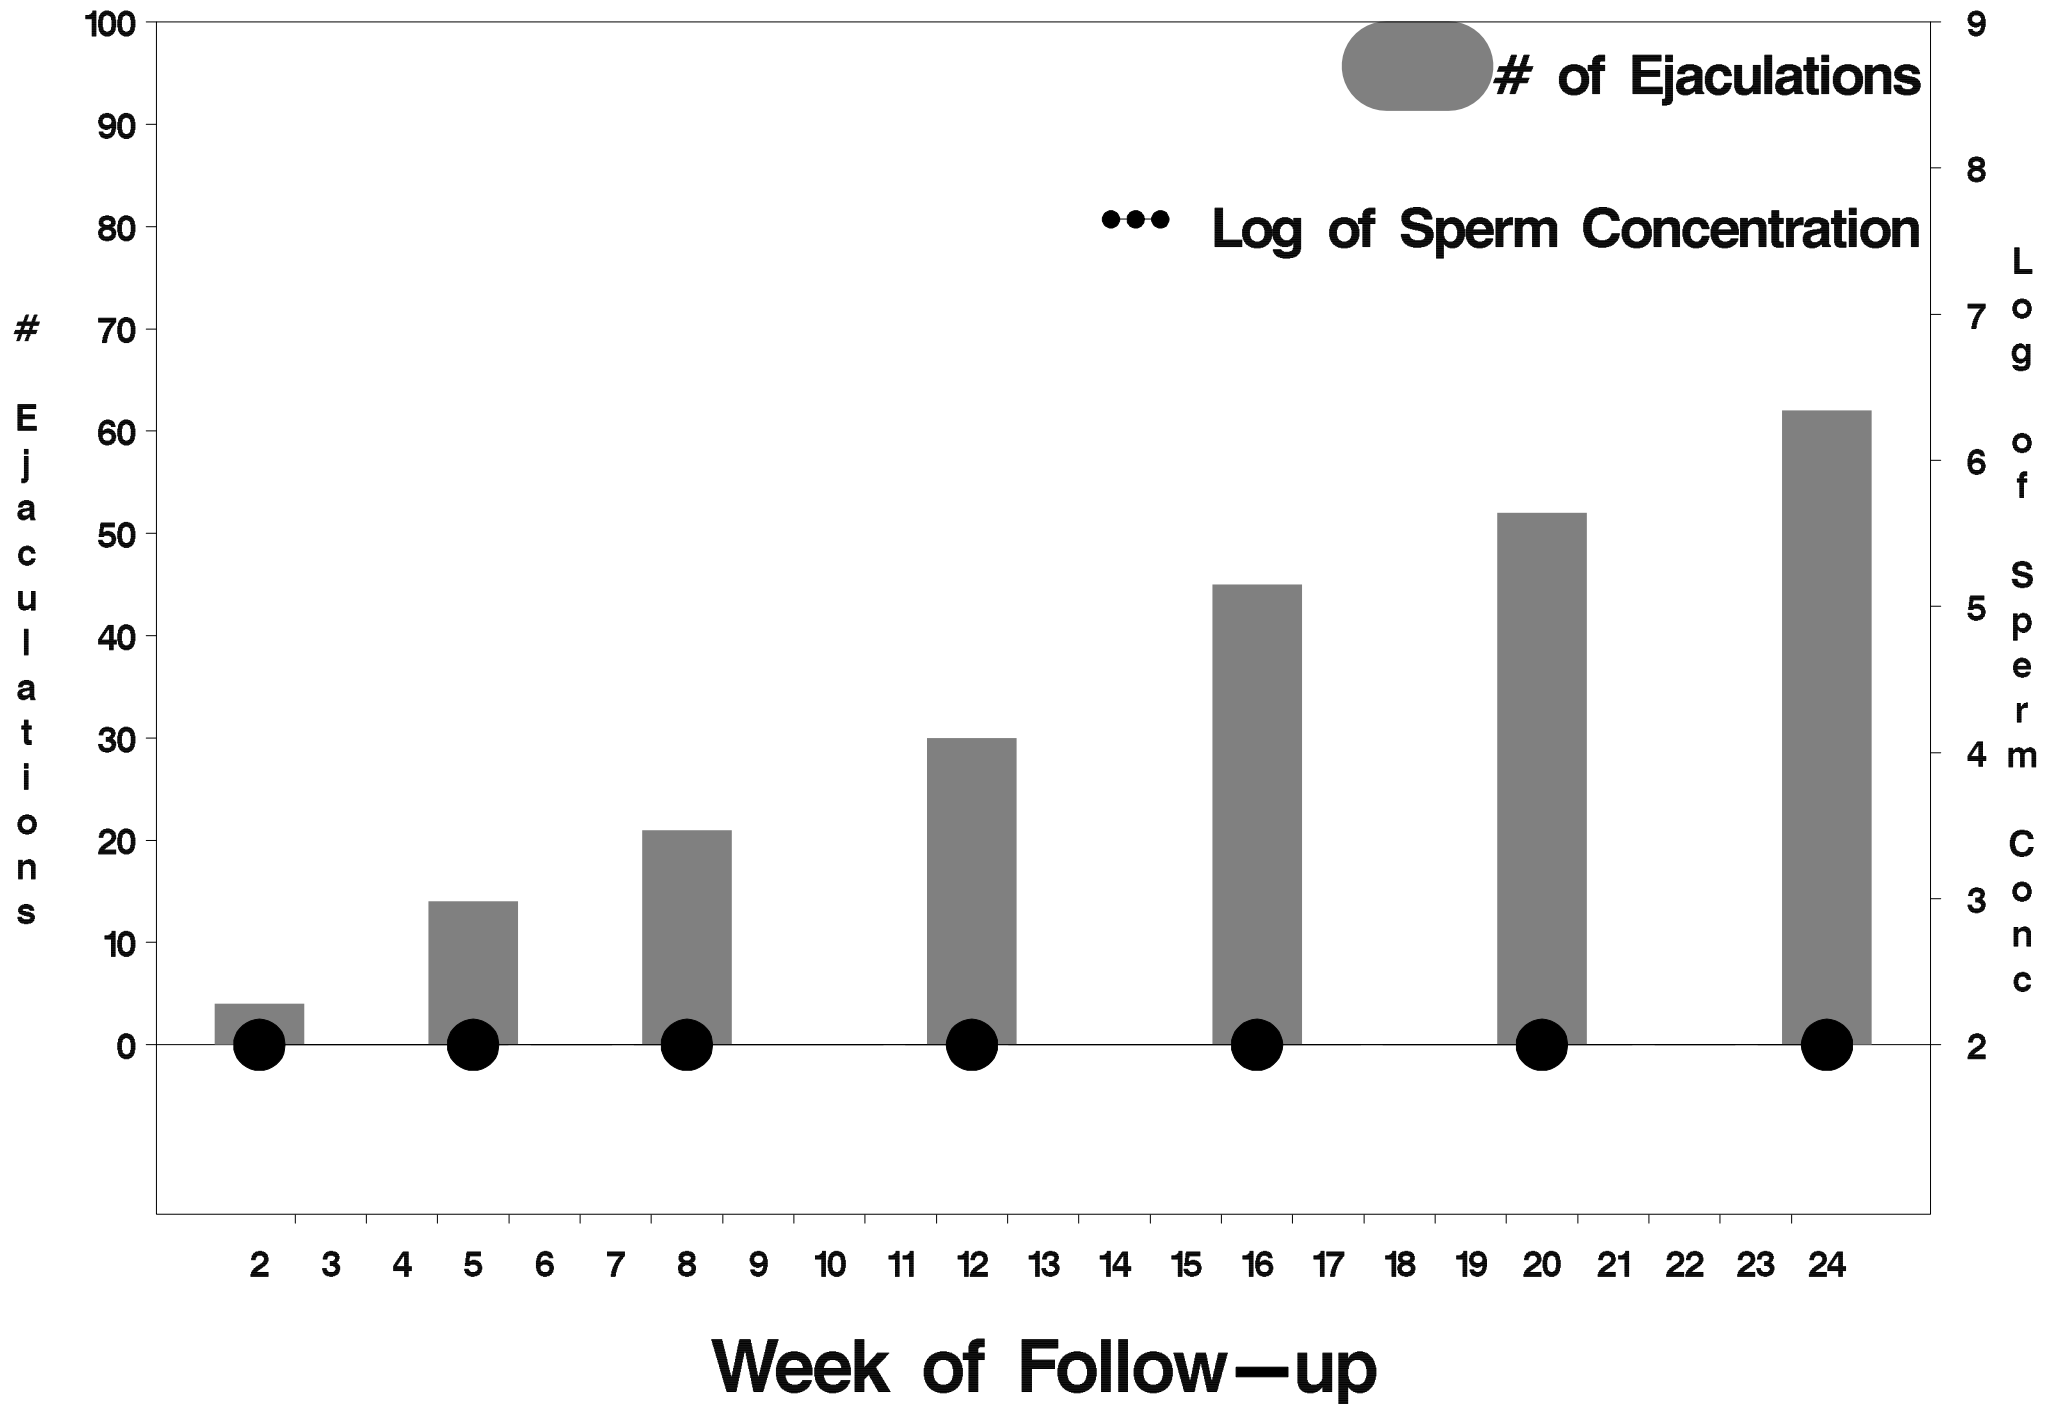



# Participant number= 745

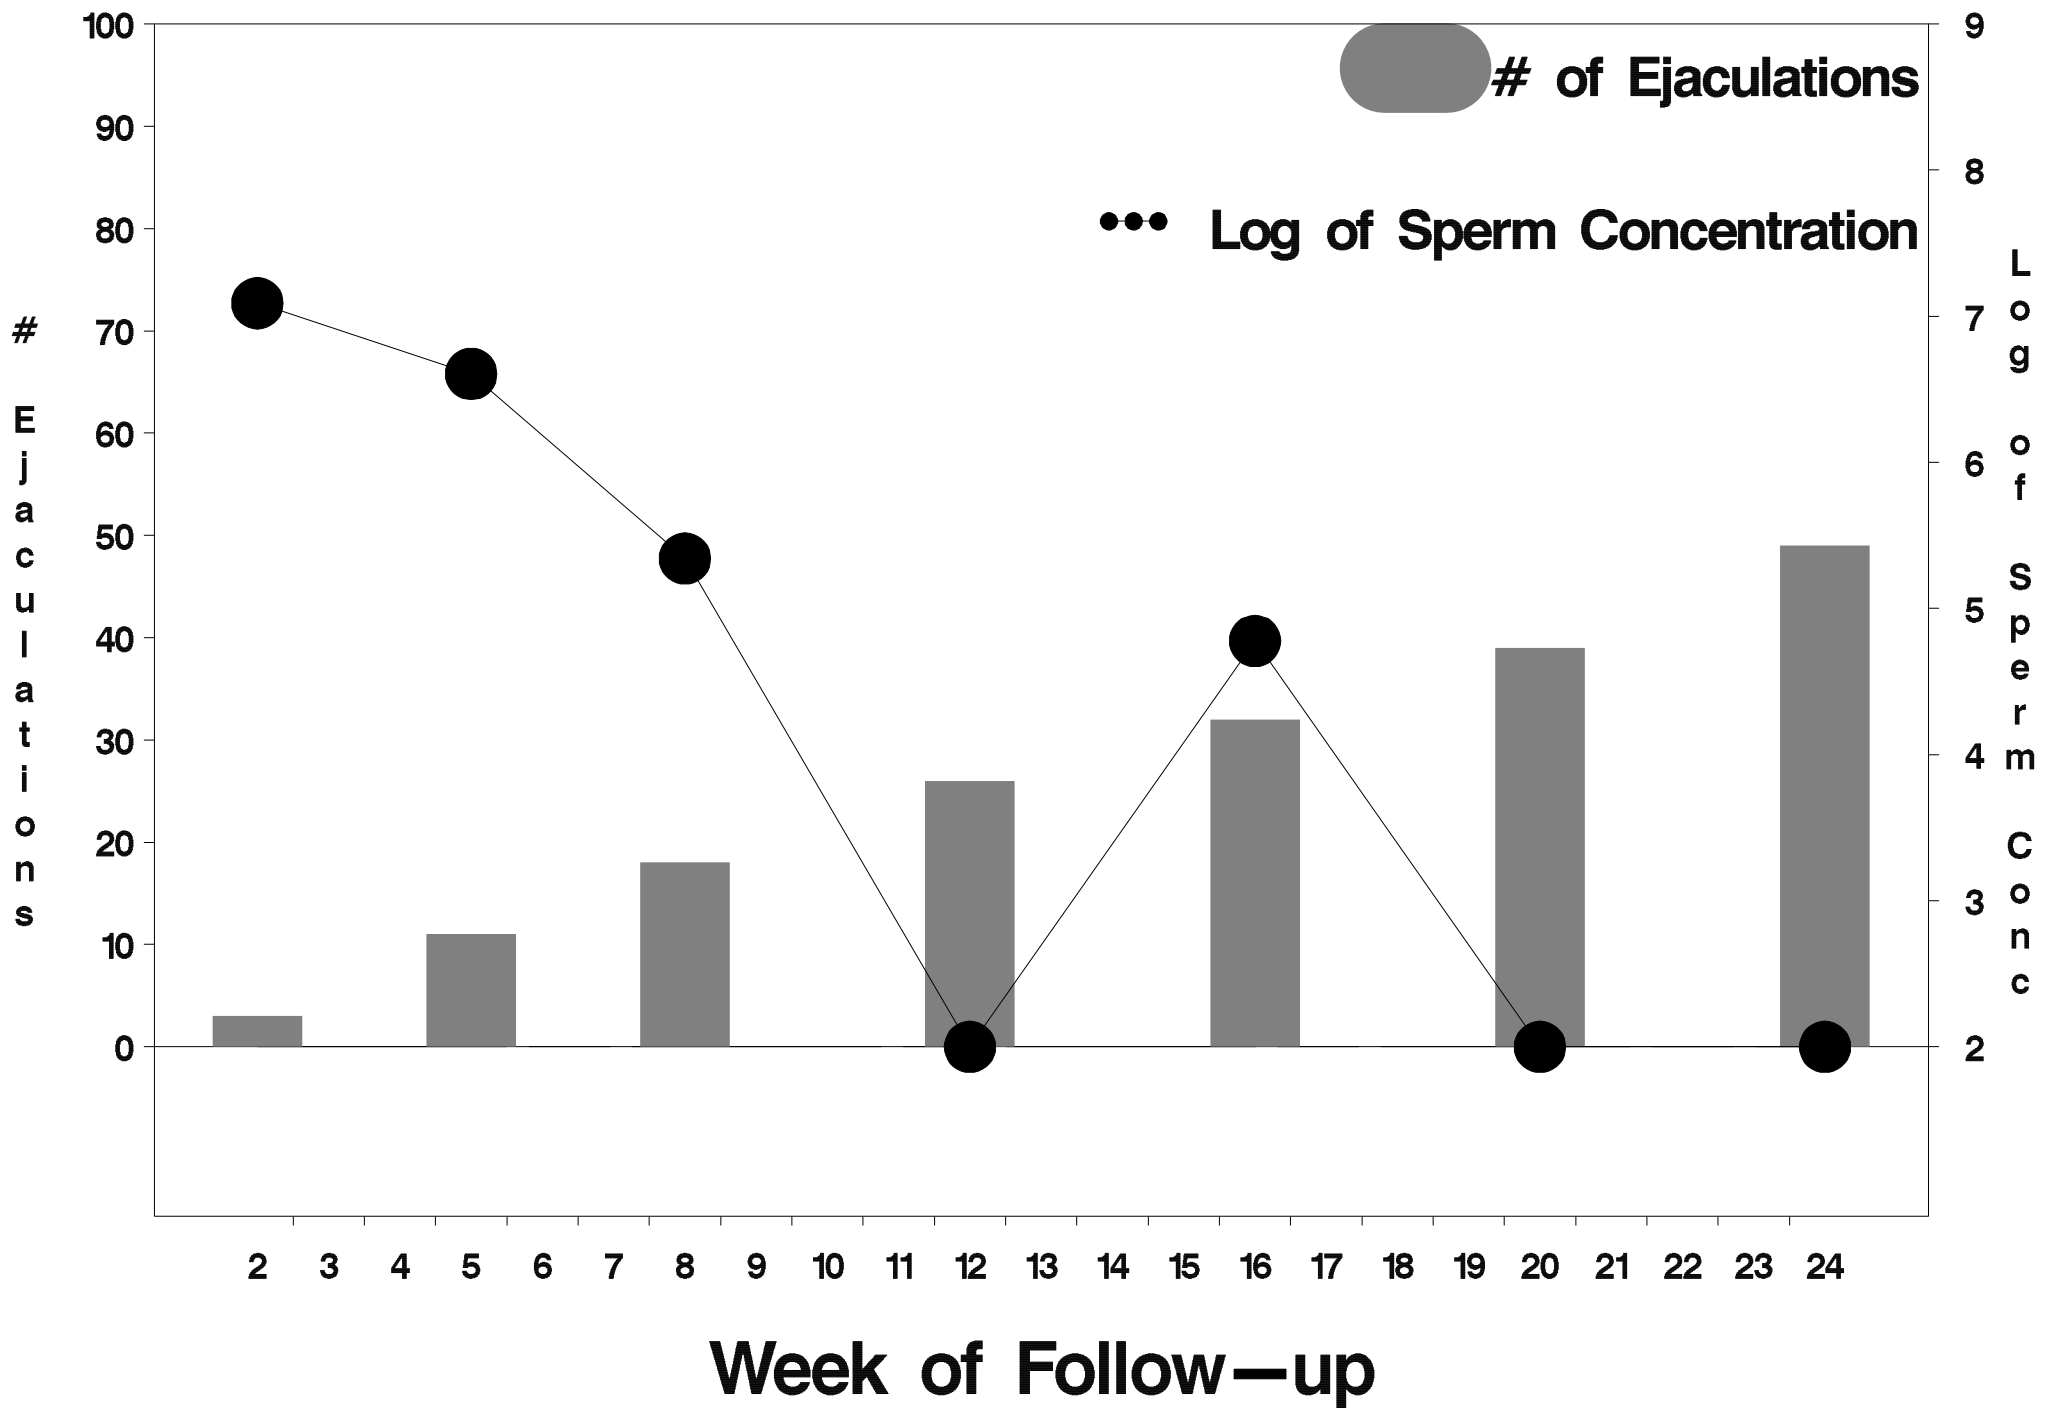

# Participant number= 746

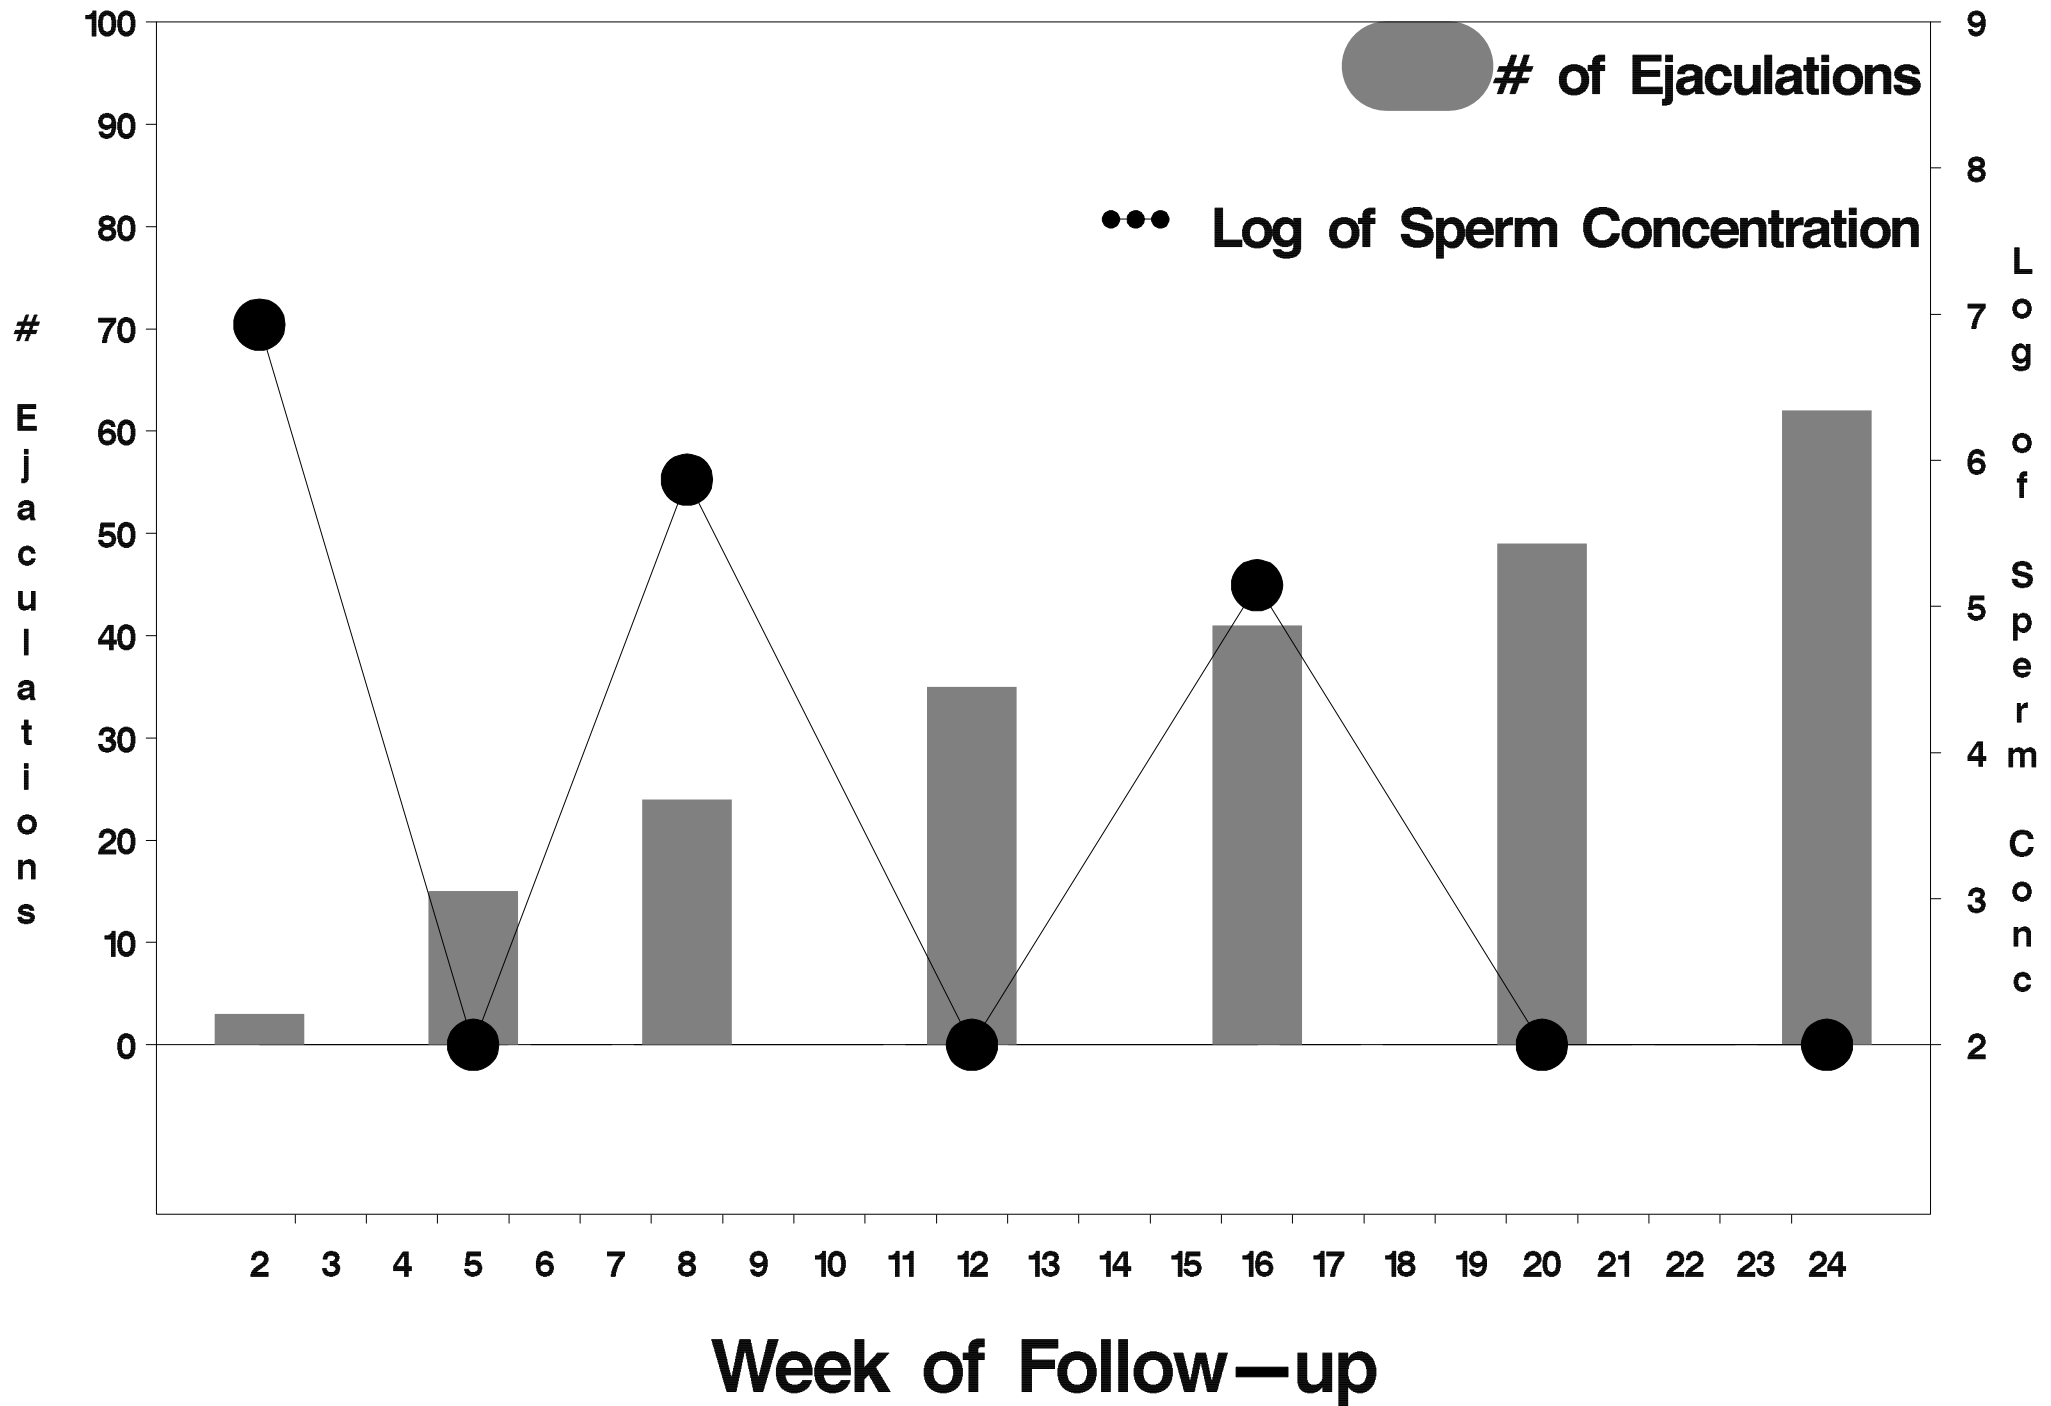



# Participant number= 747

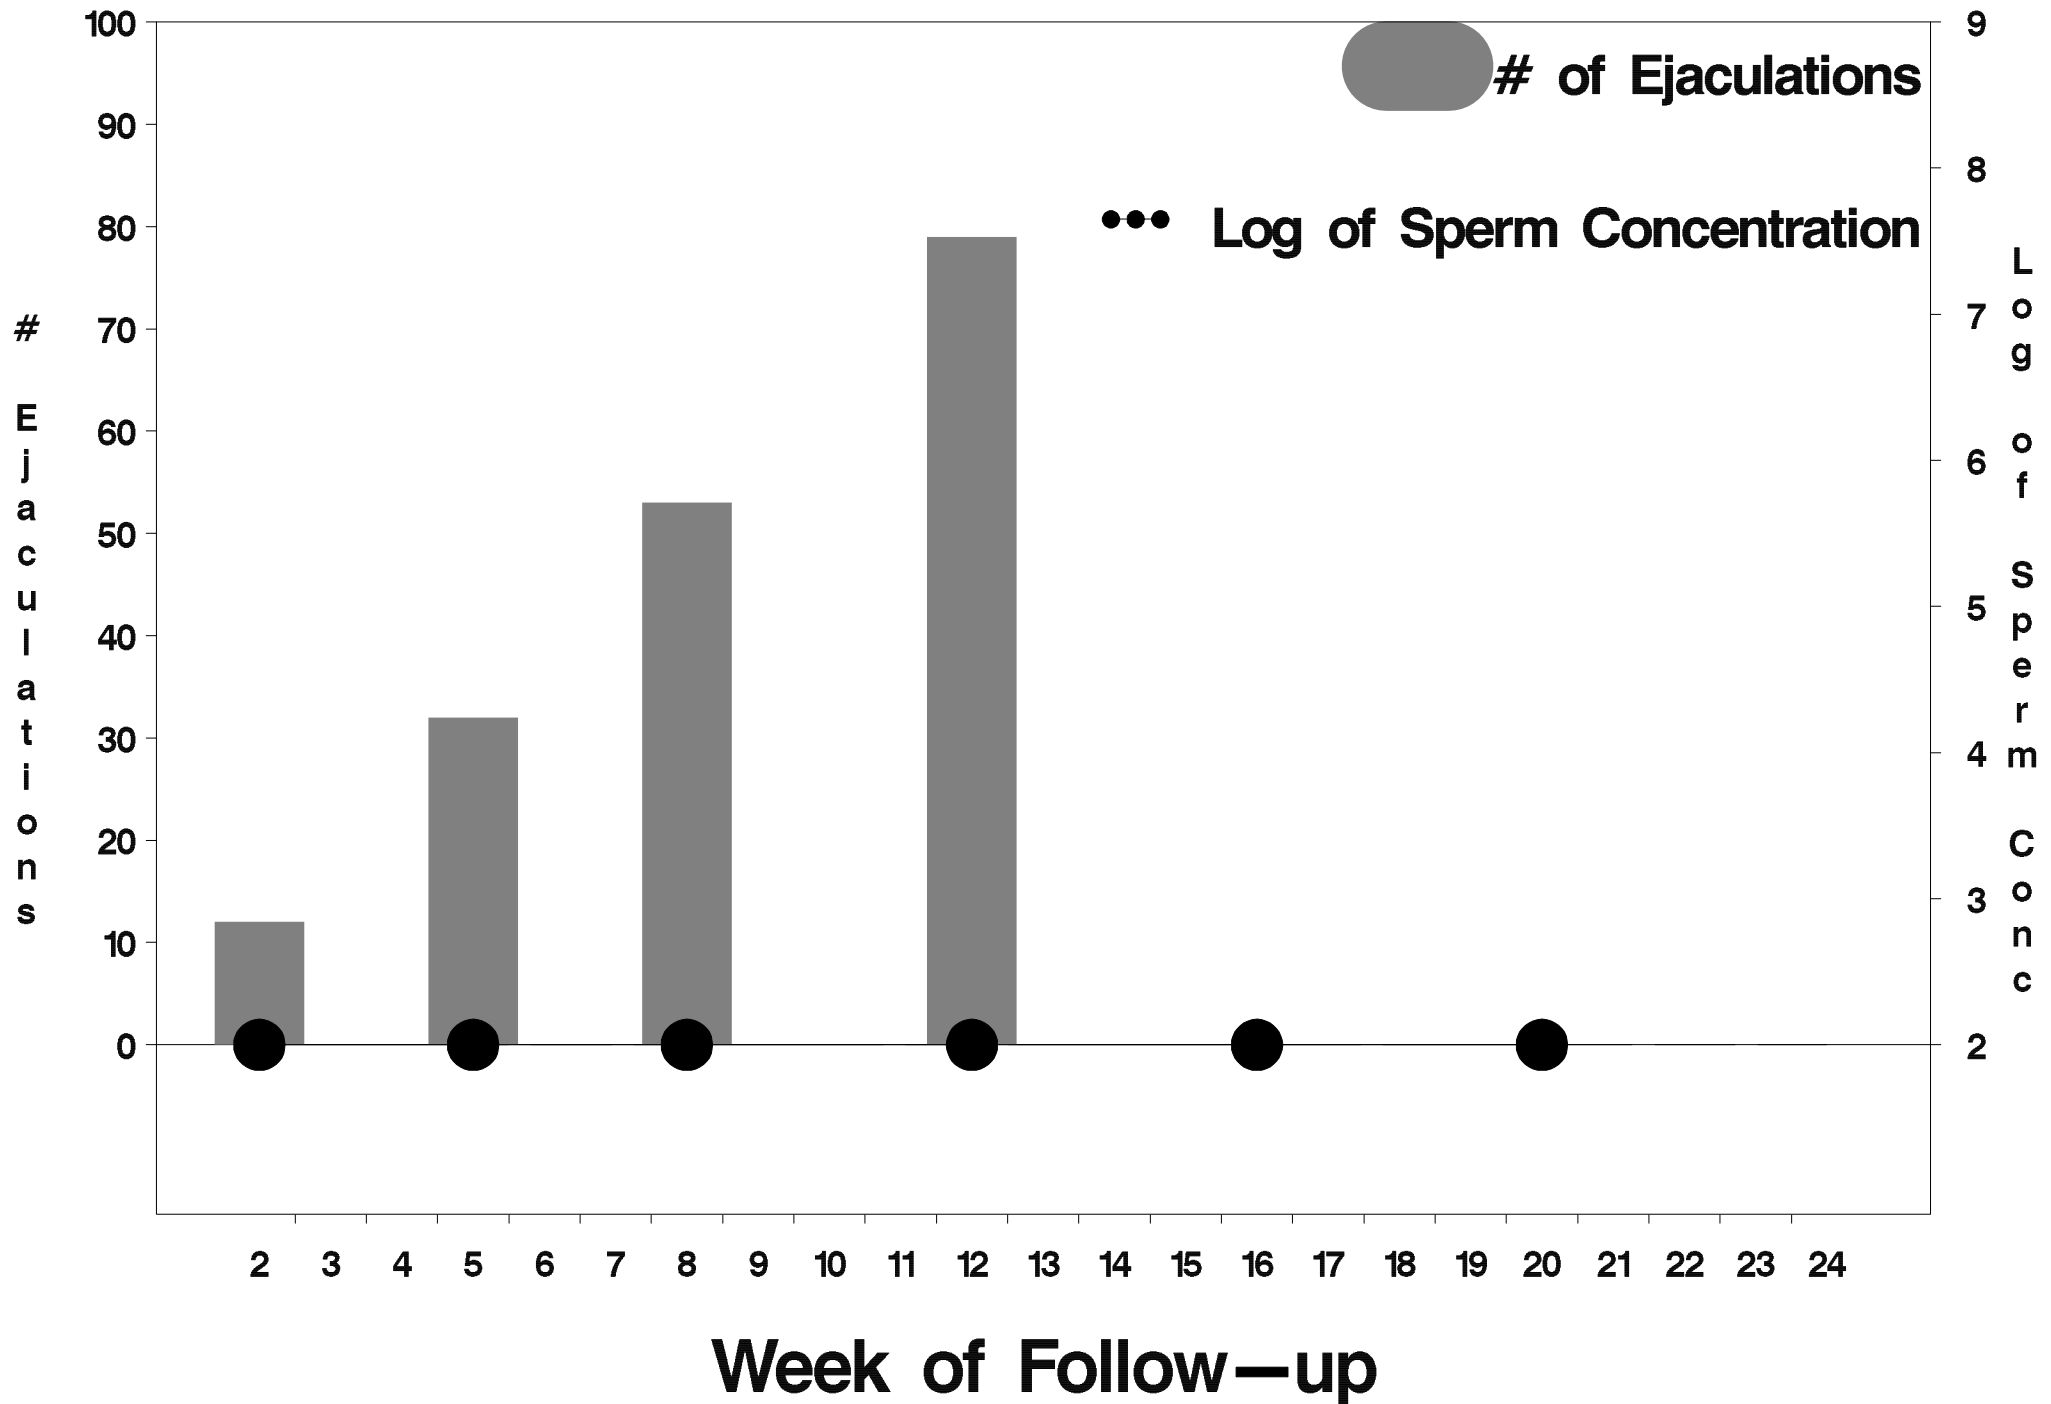

# Participant number= 748

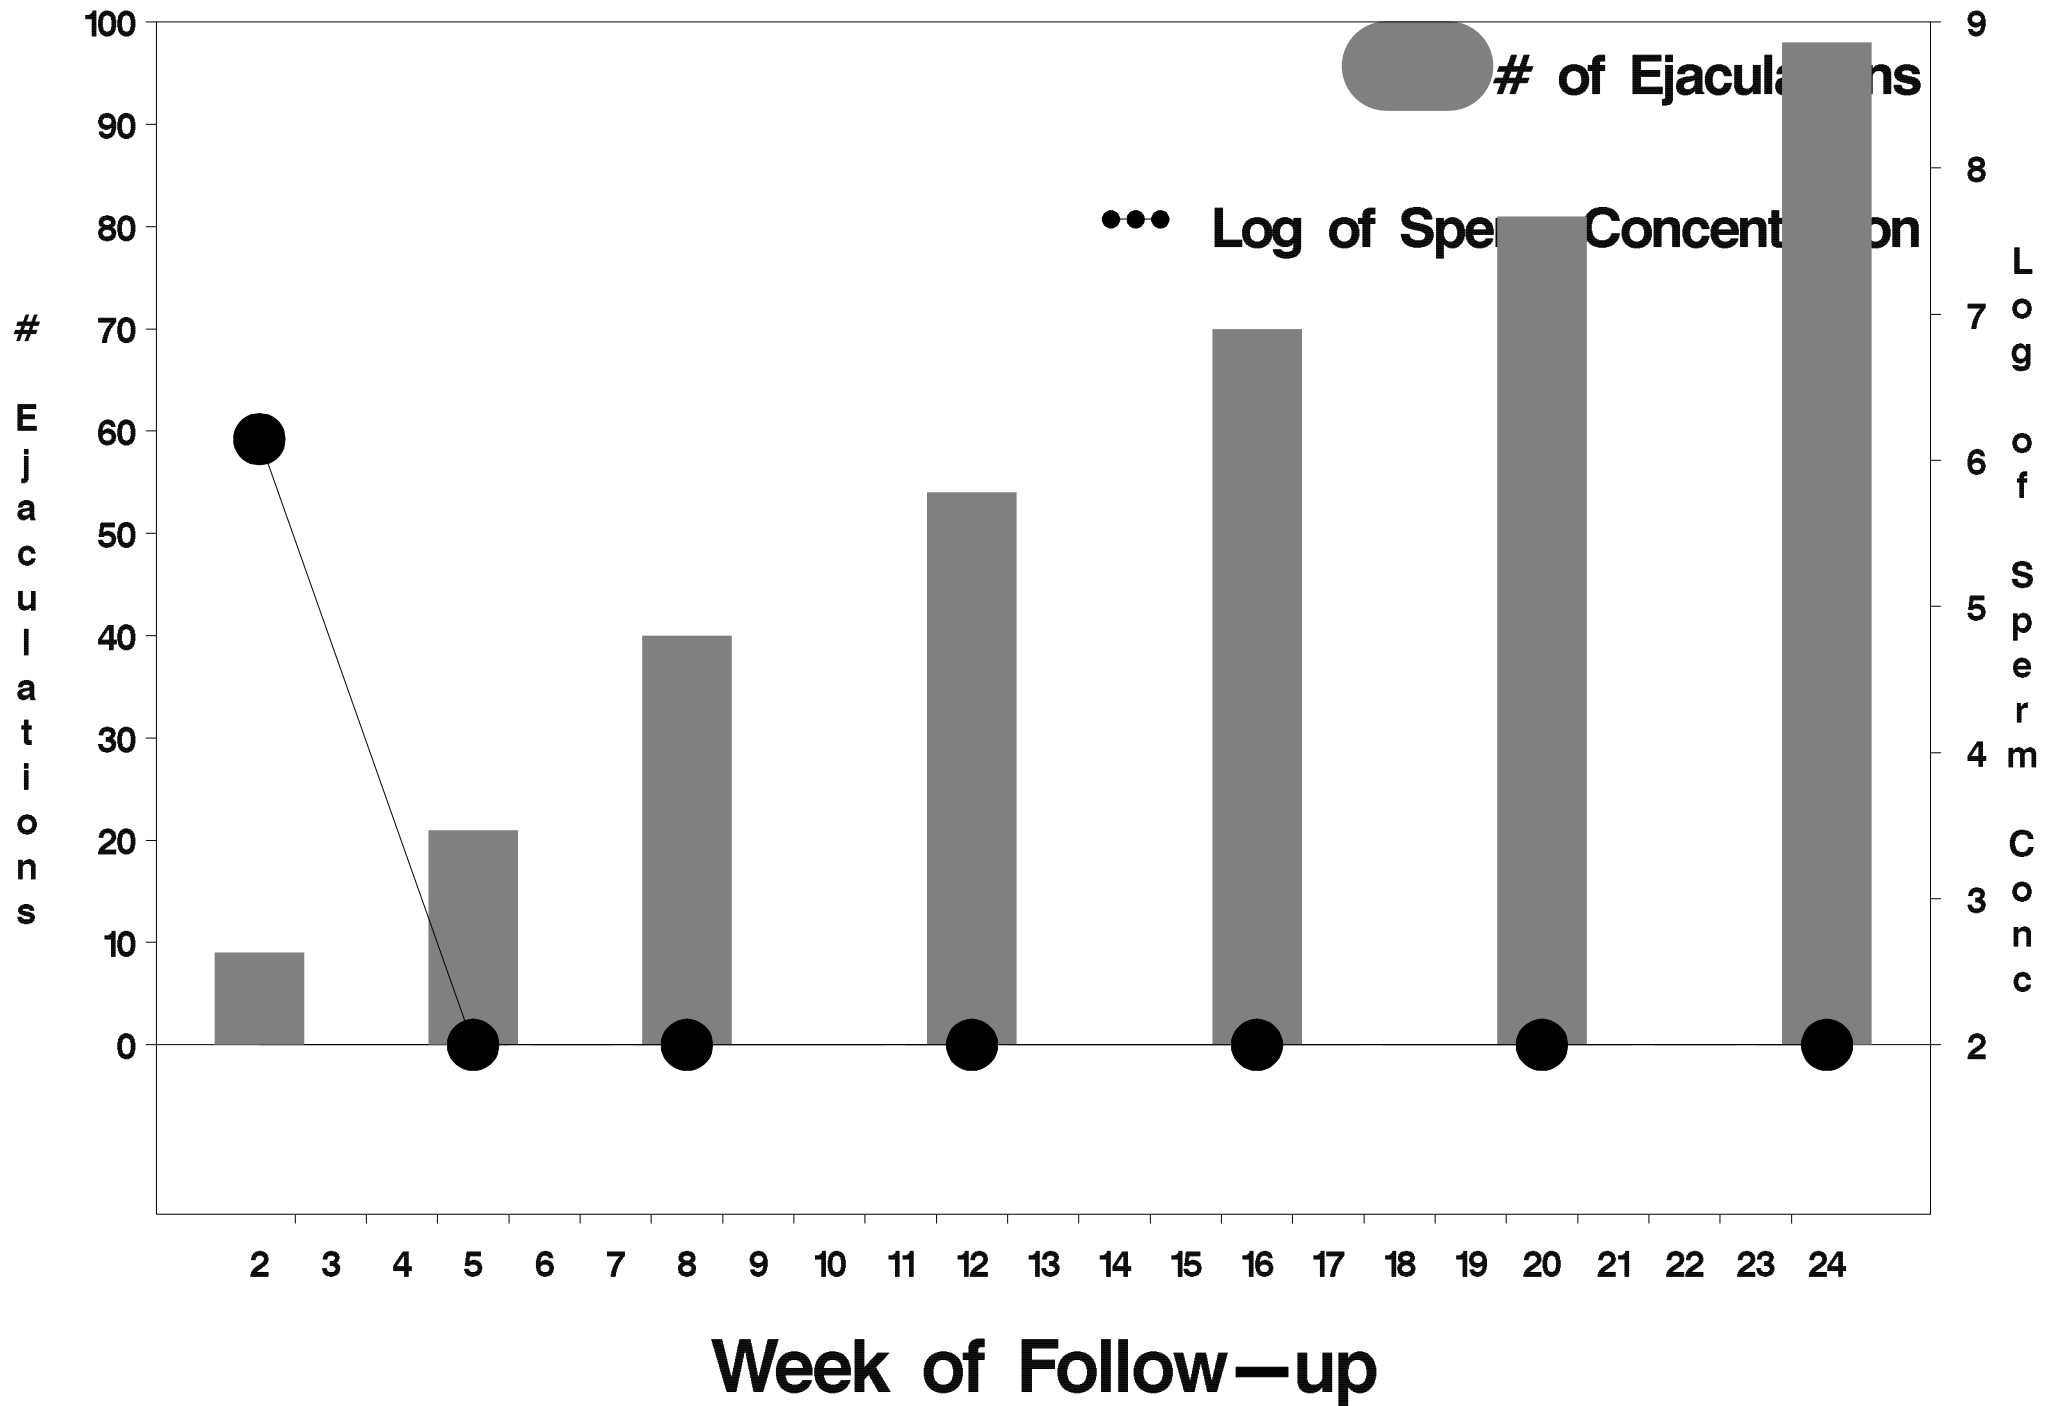

# Participant number= 749

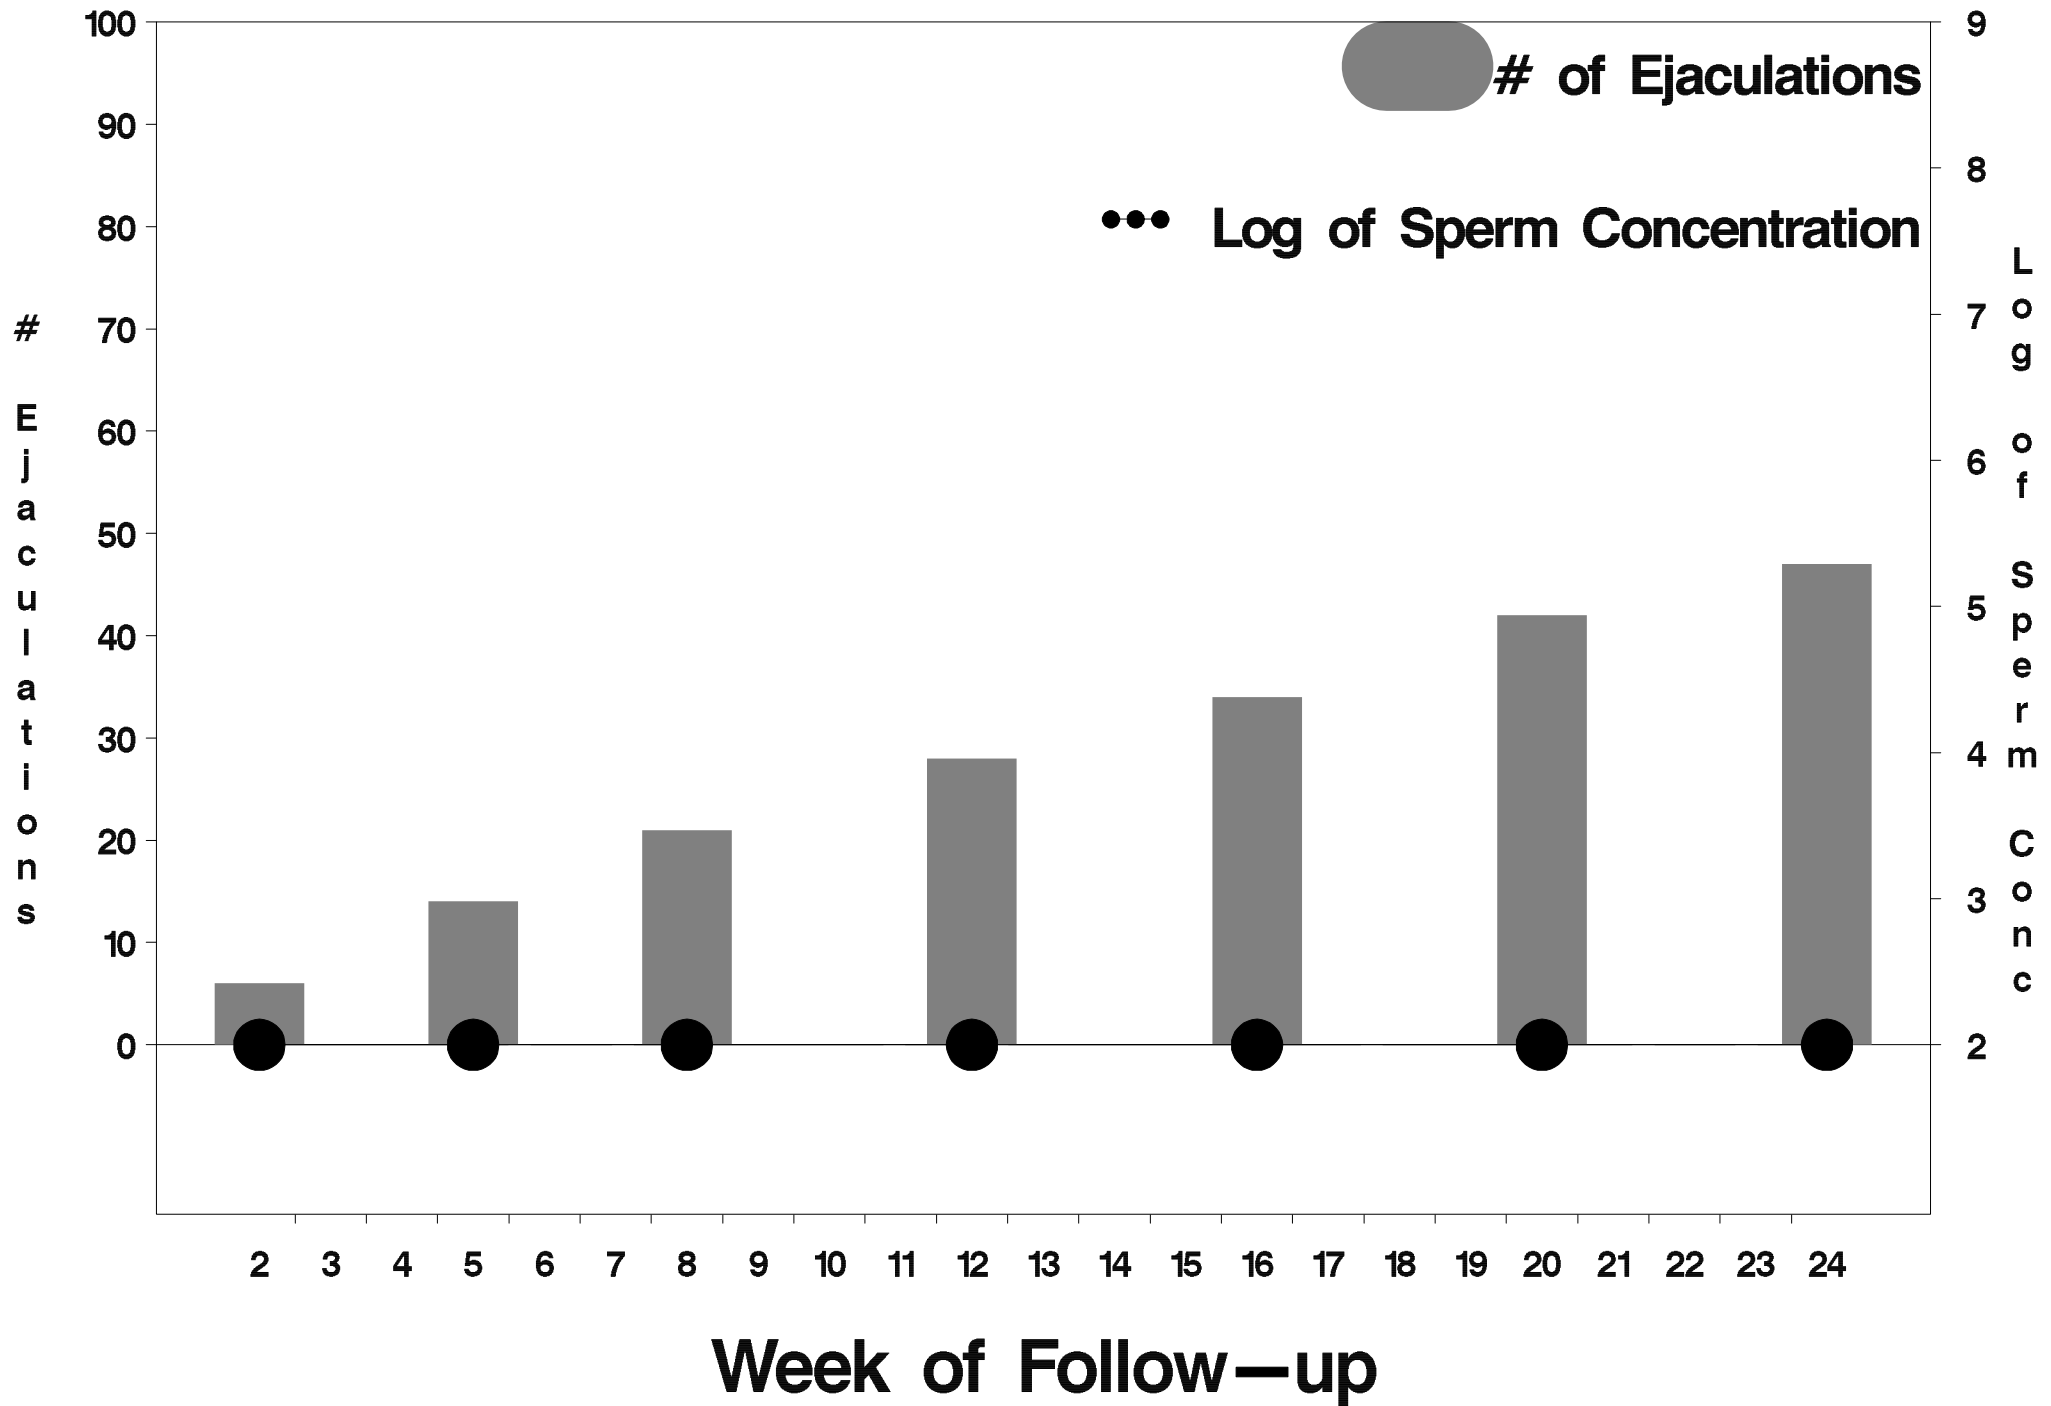

# Participant number= 750

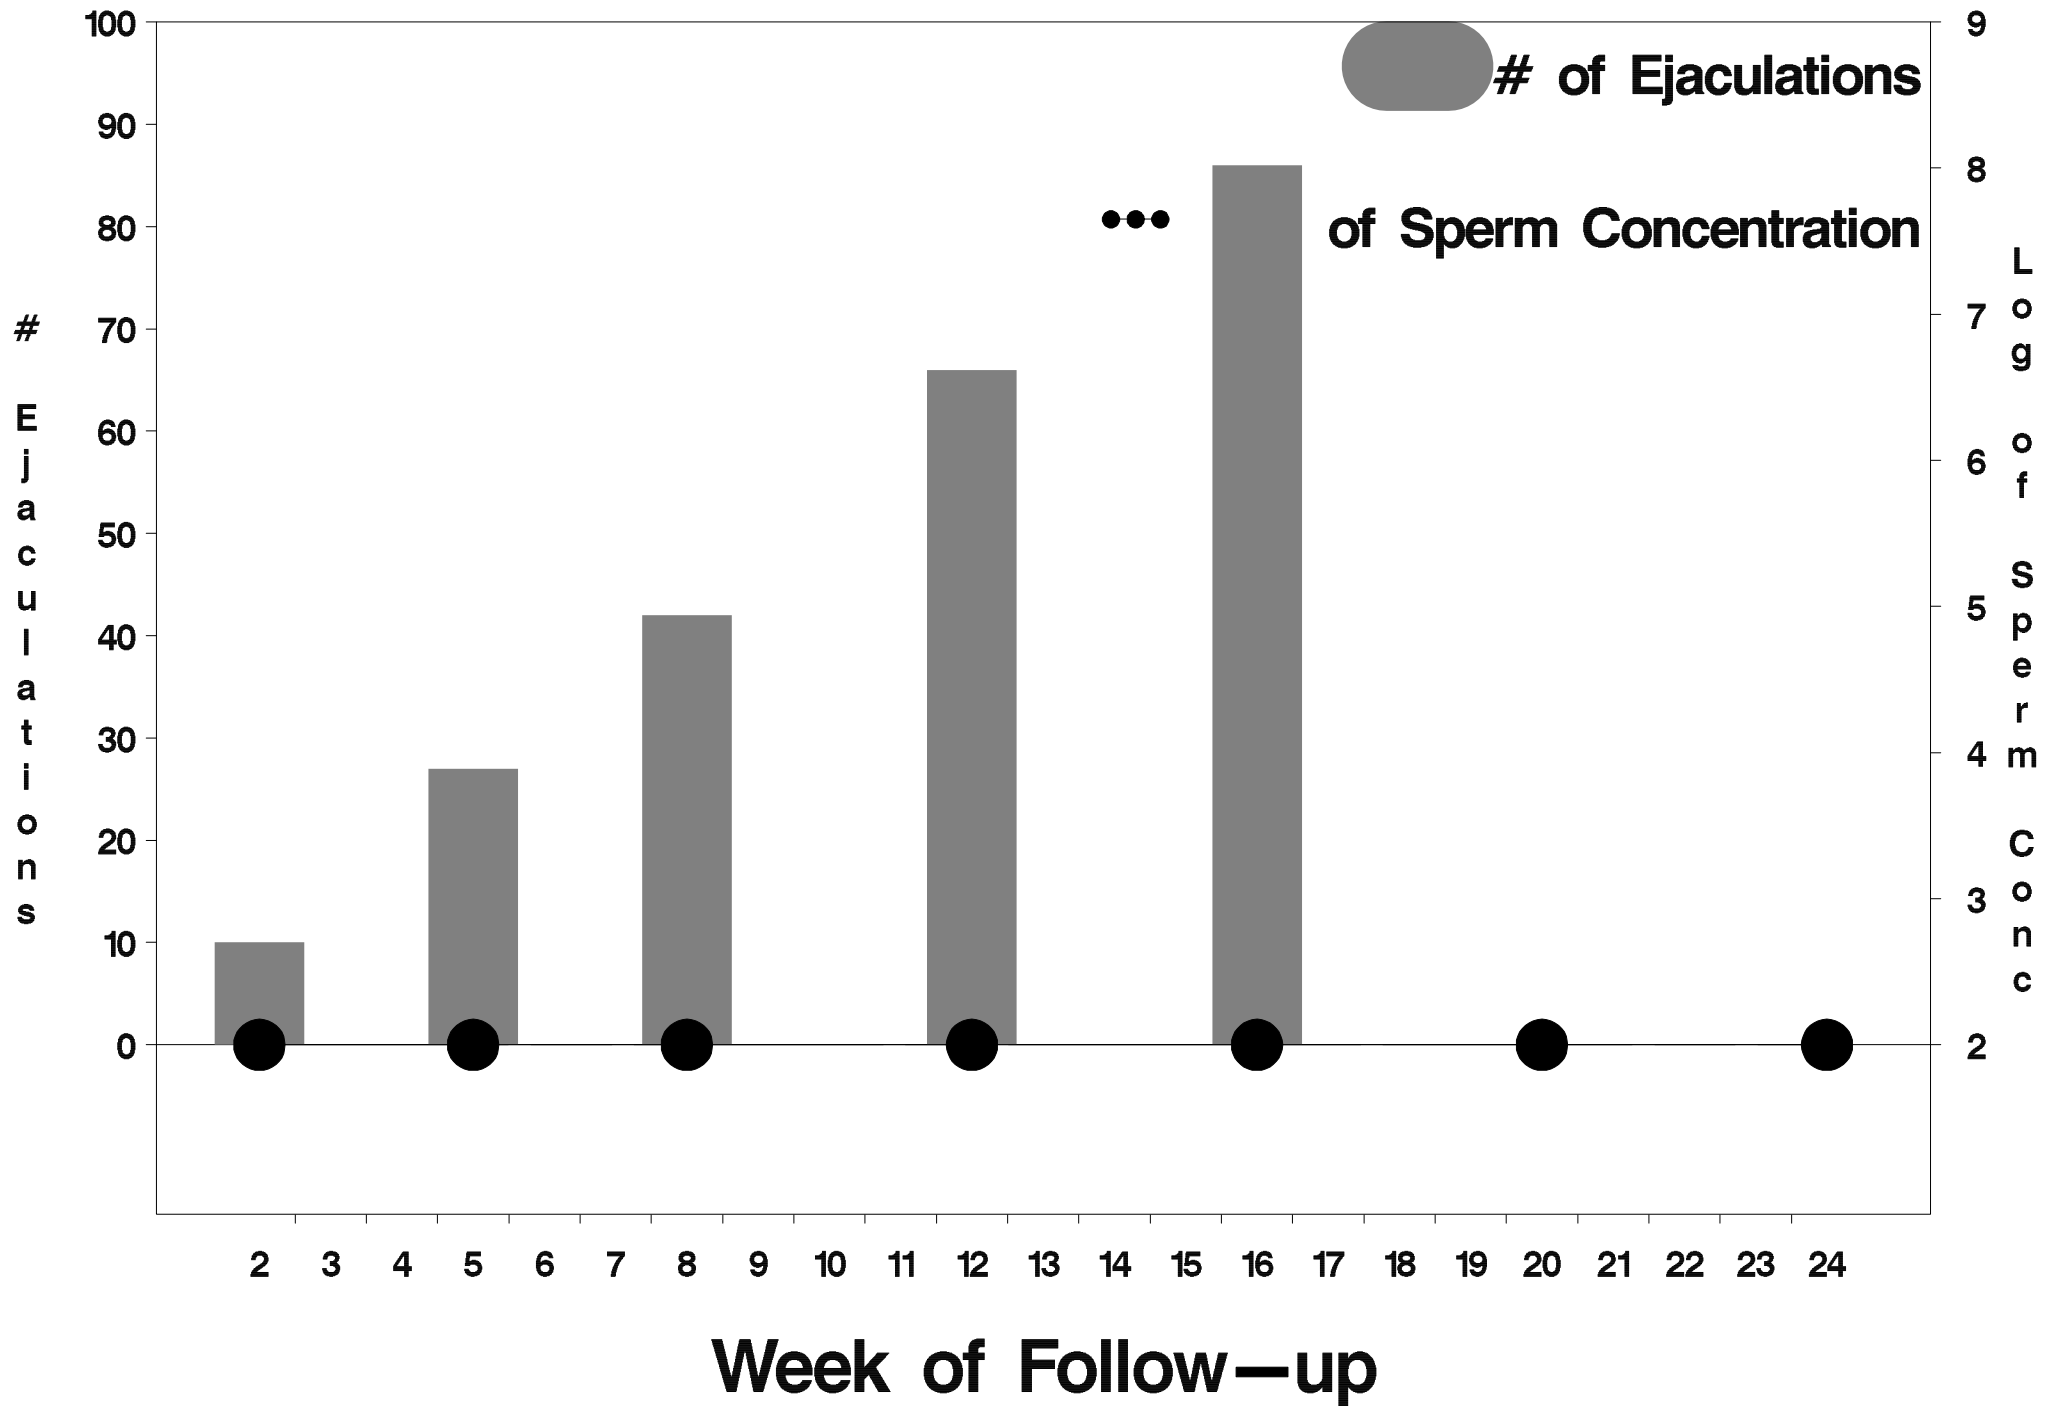

# Participant number= 751

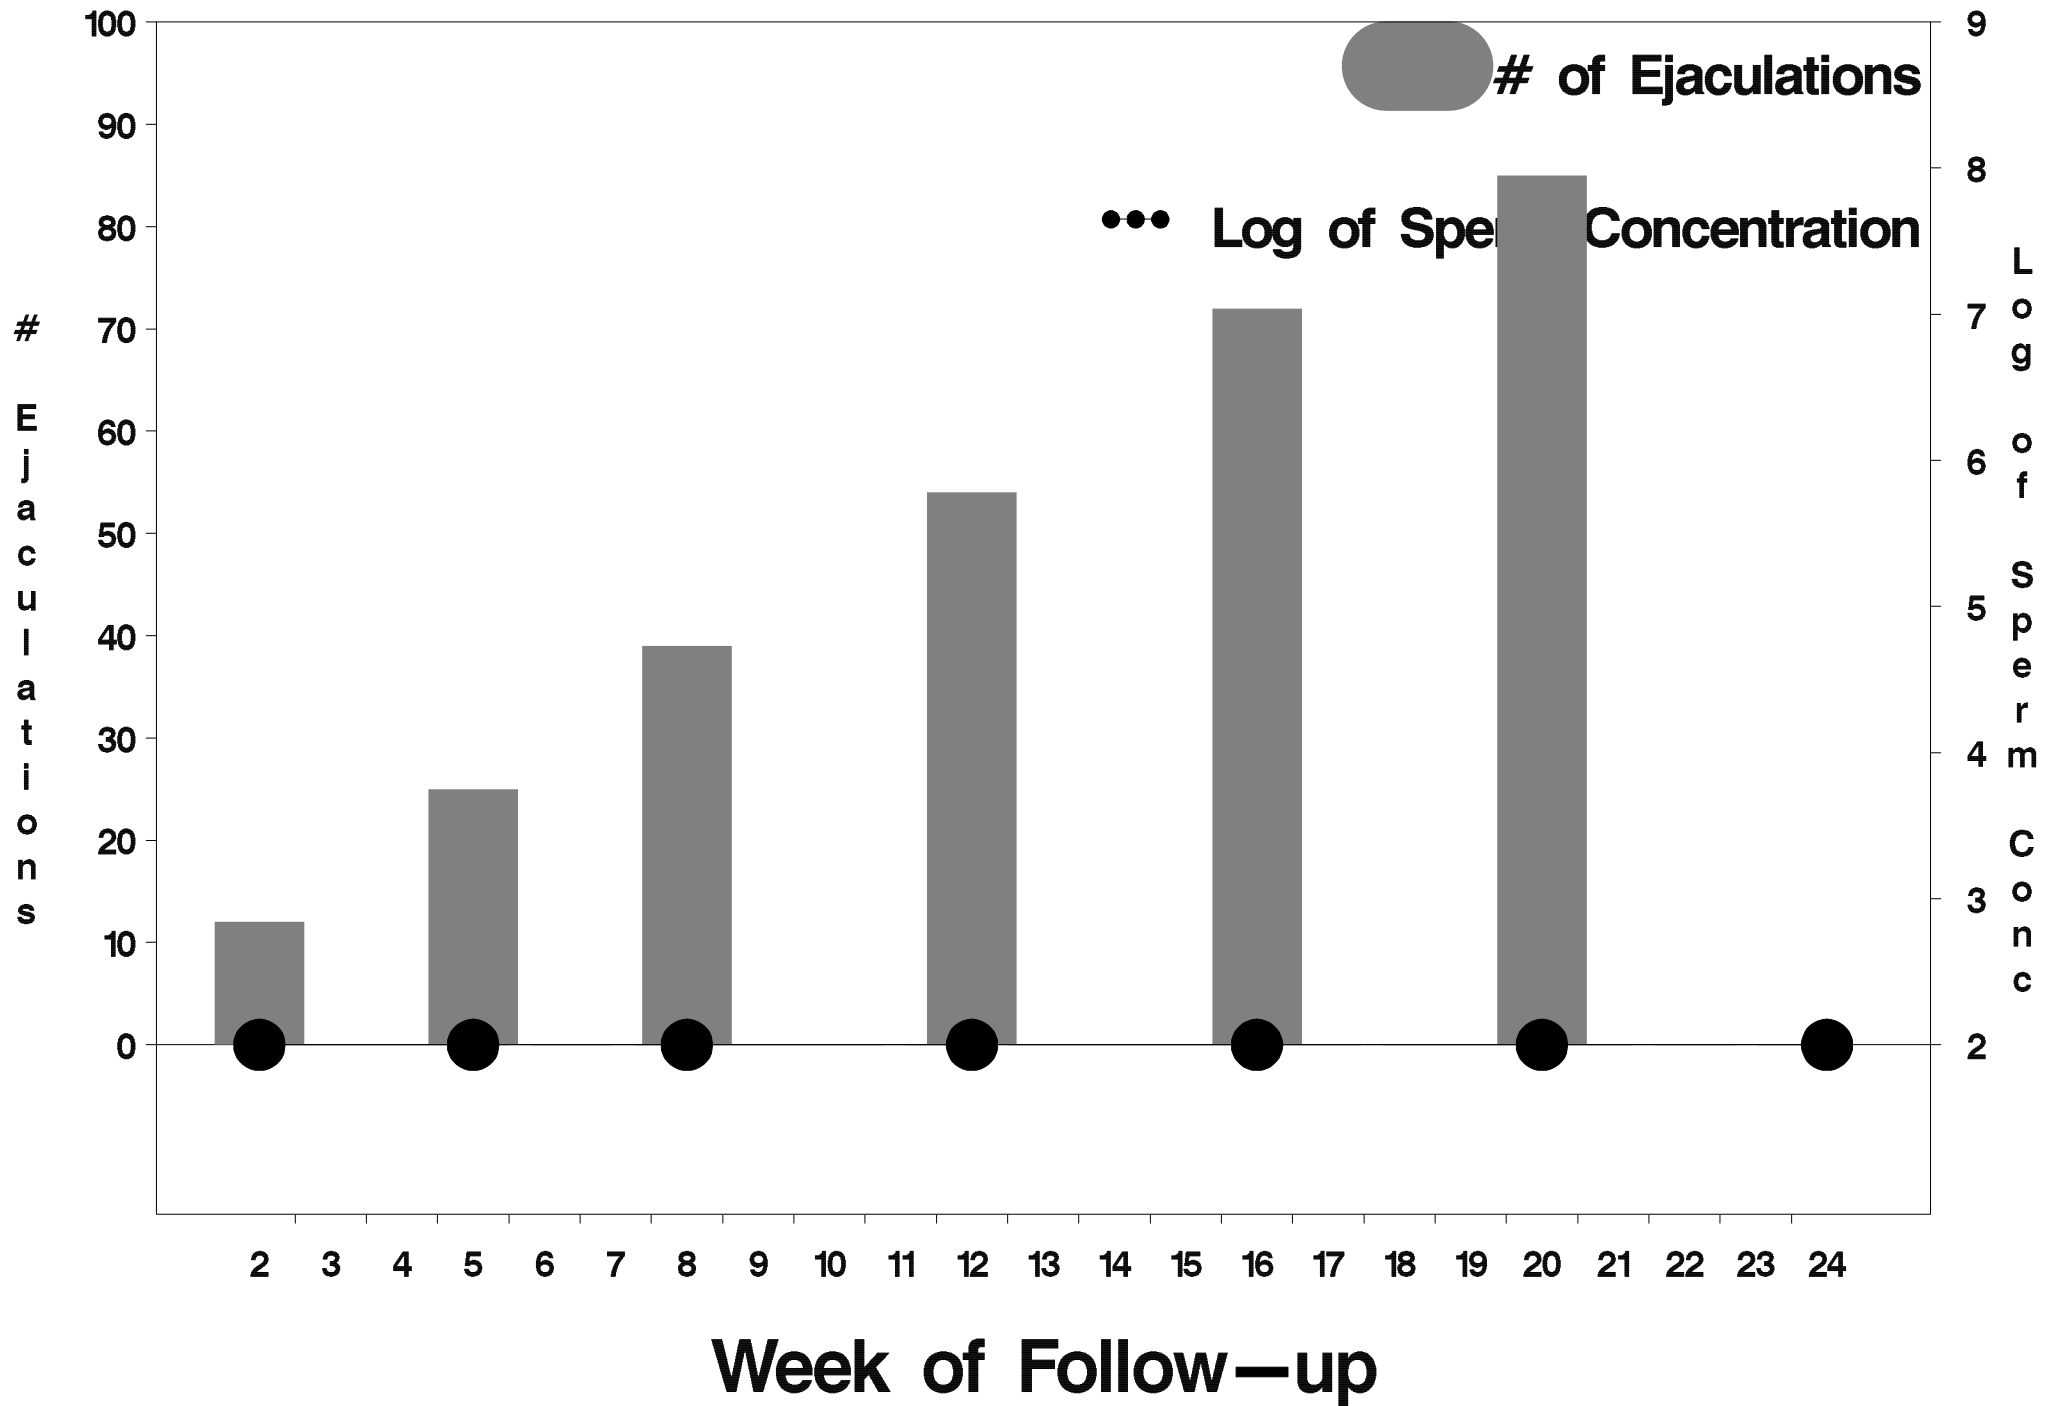

# Participant number= 752

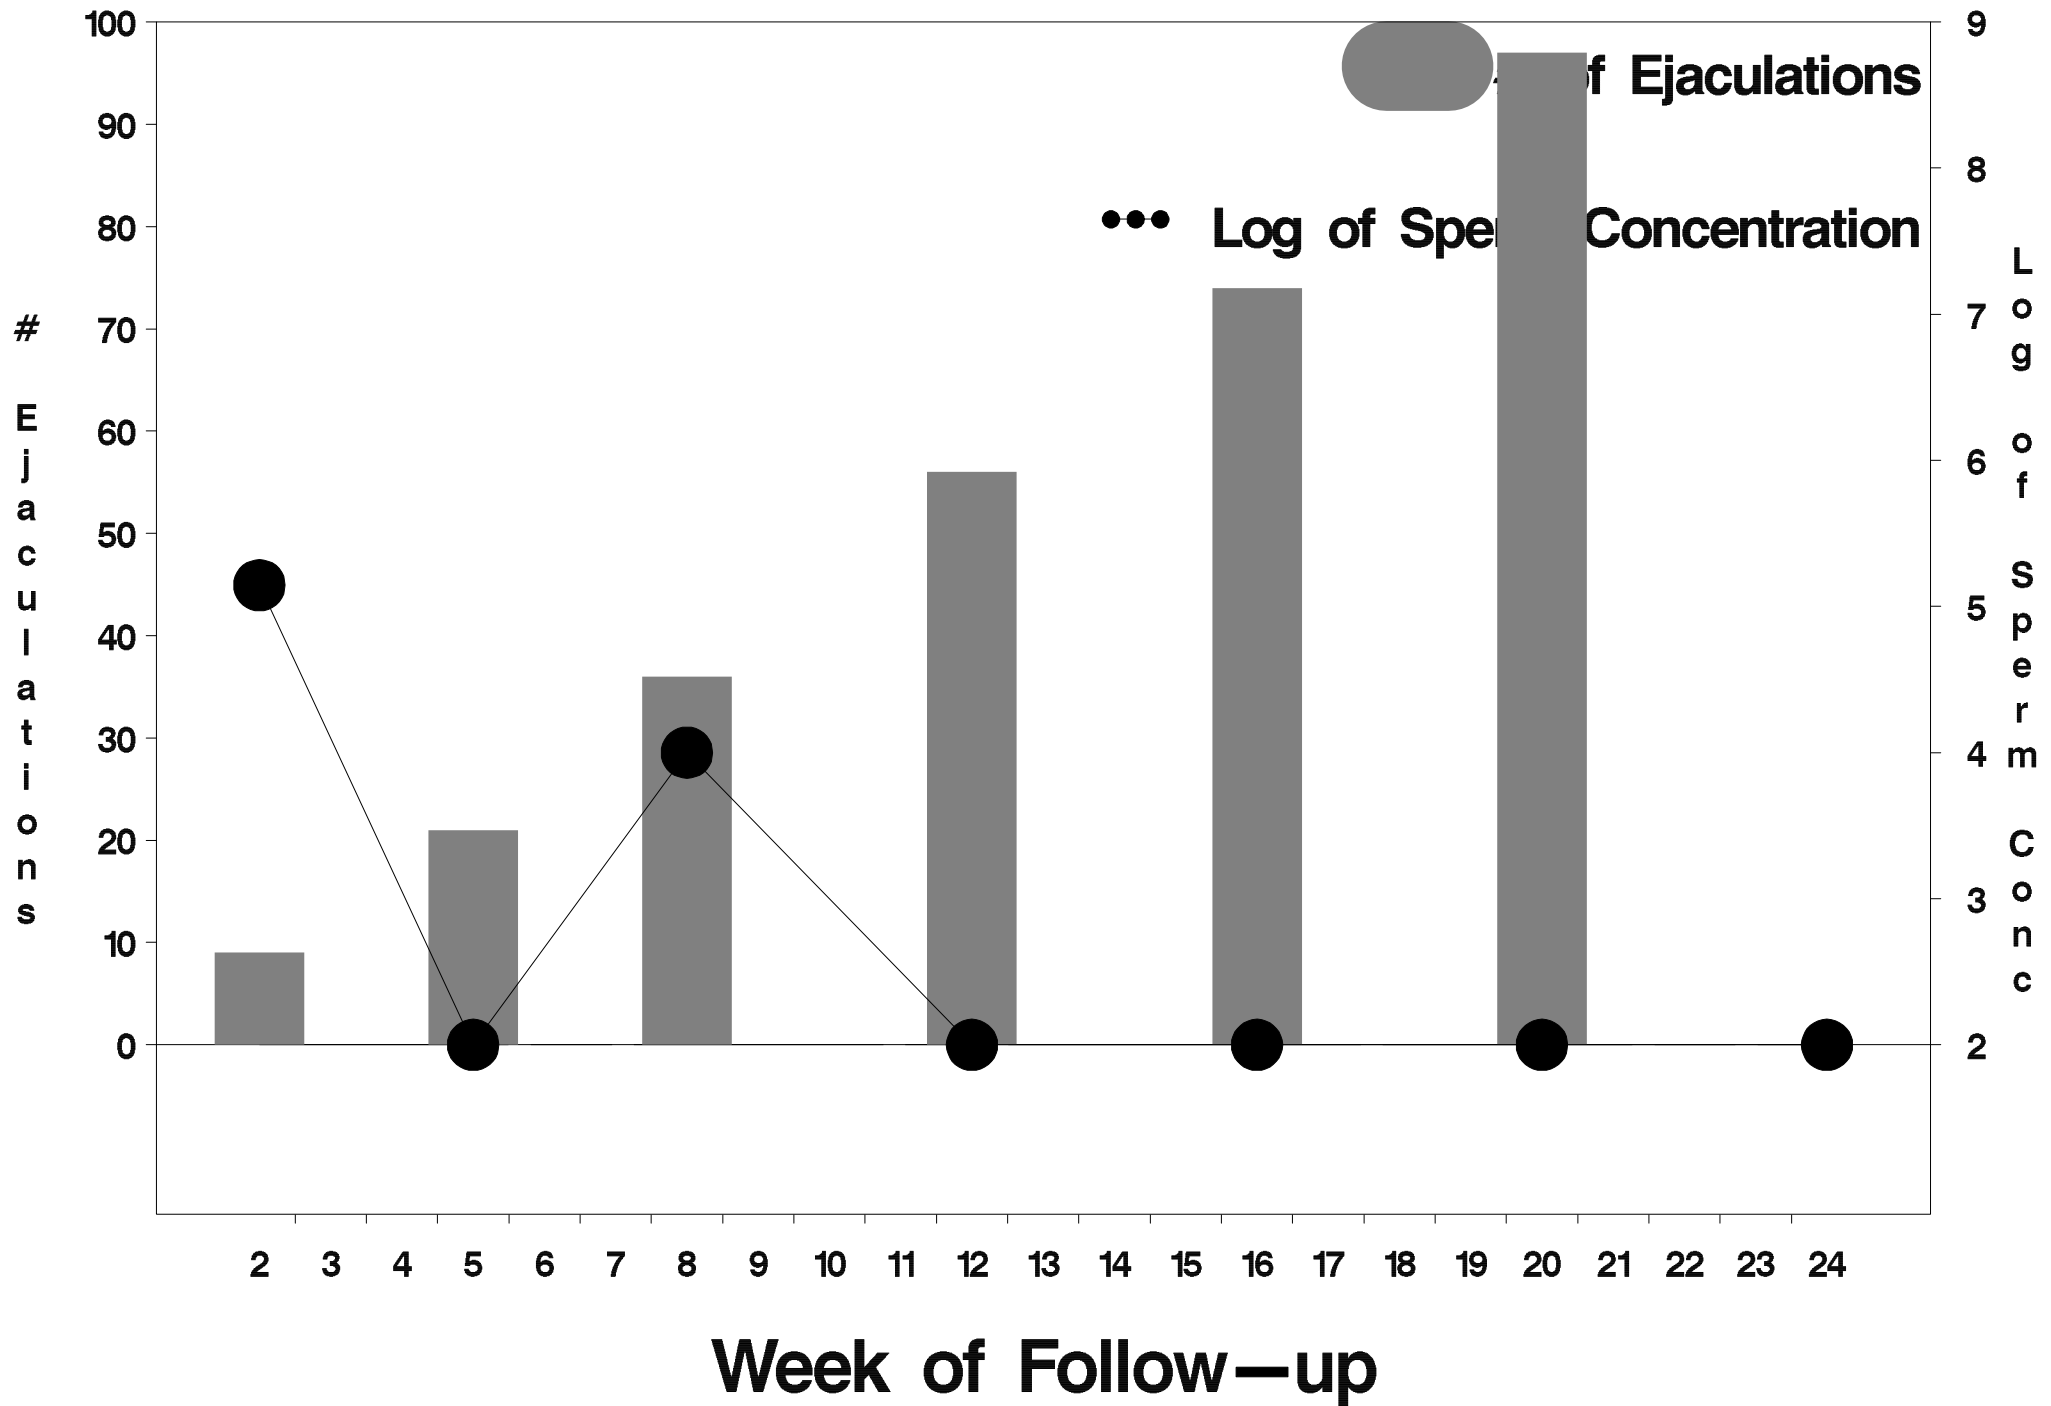



# Participant number= 754

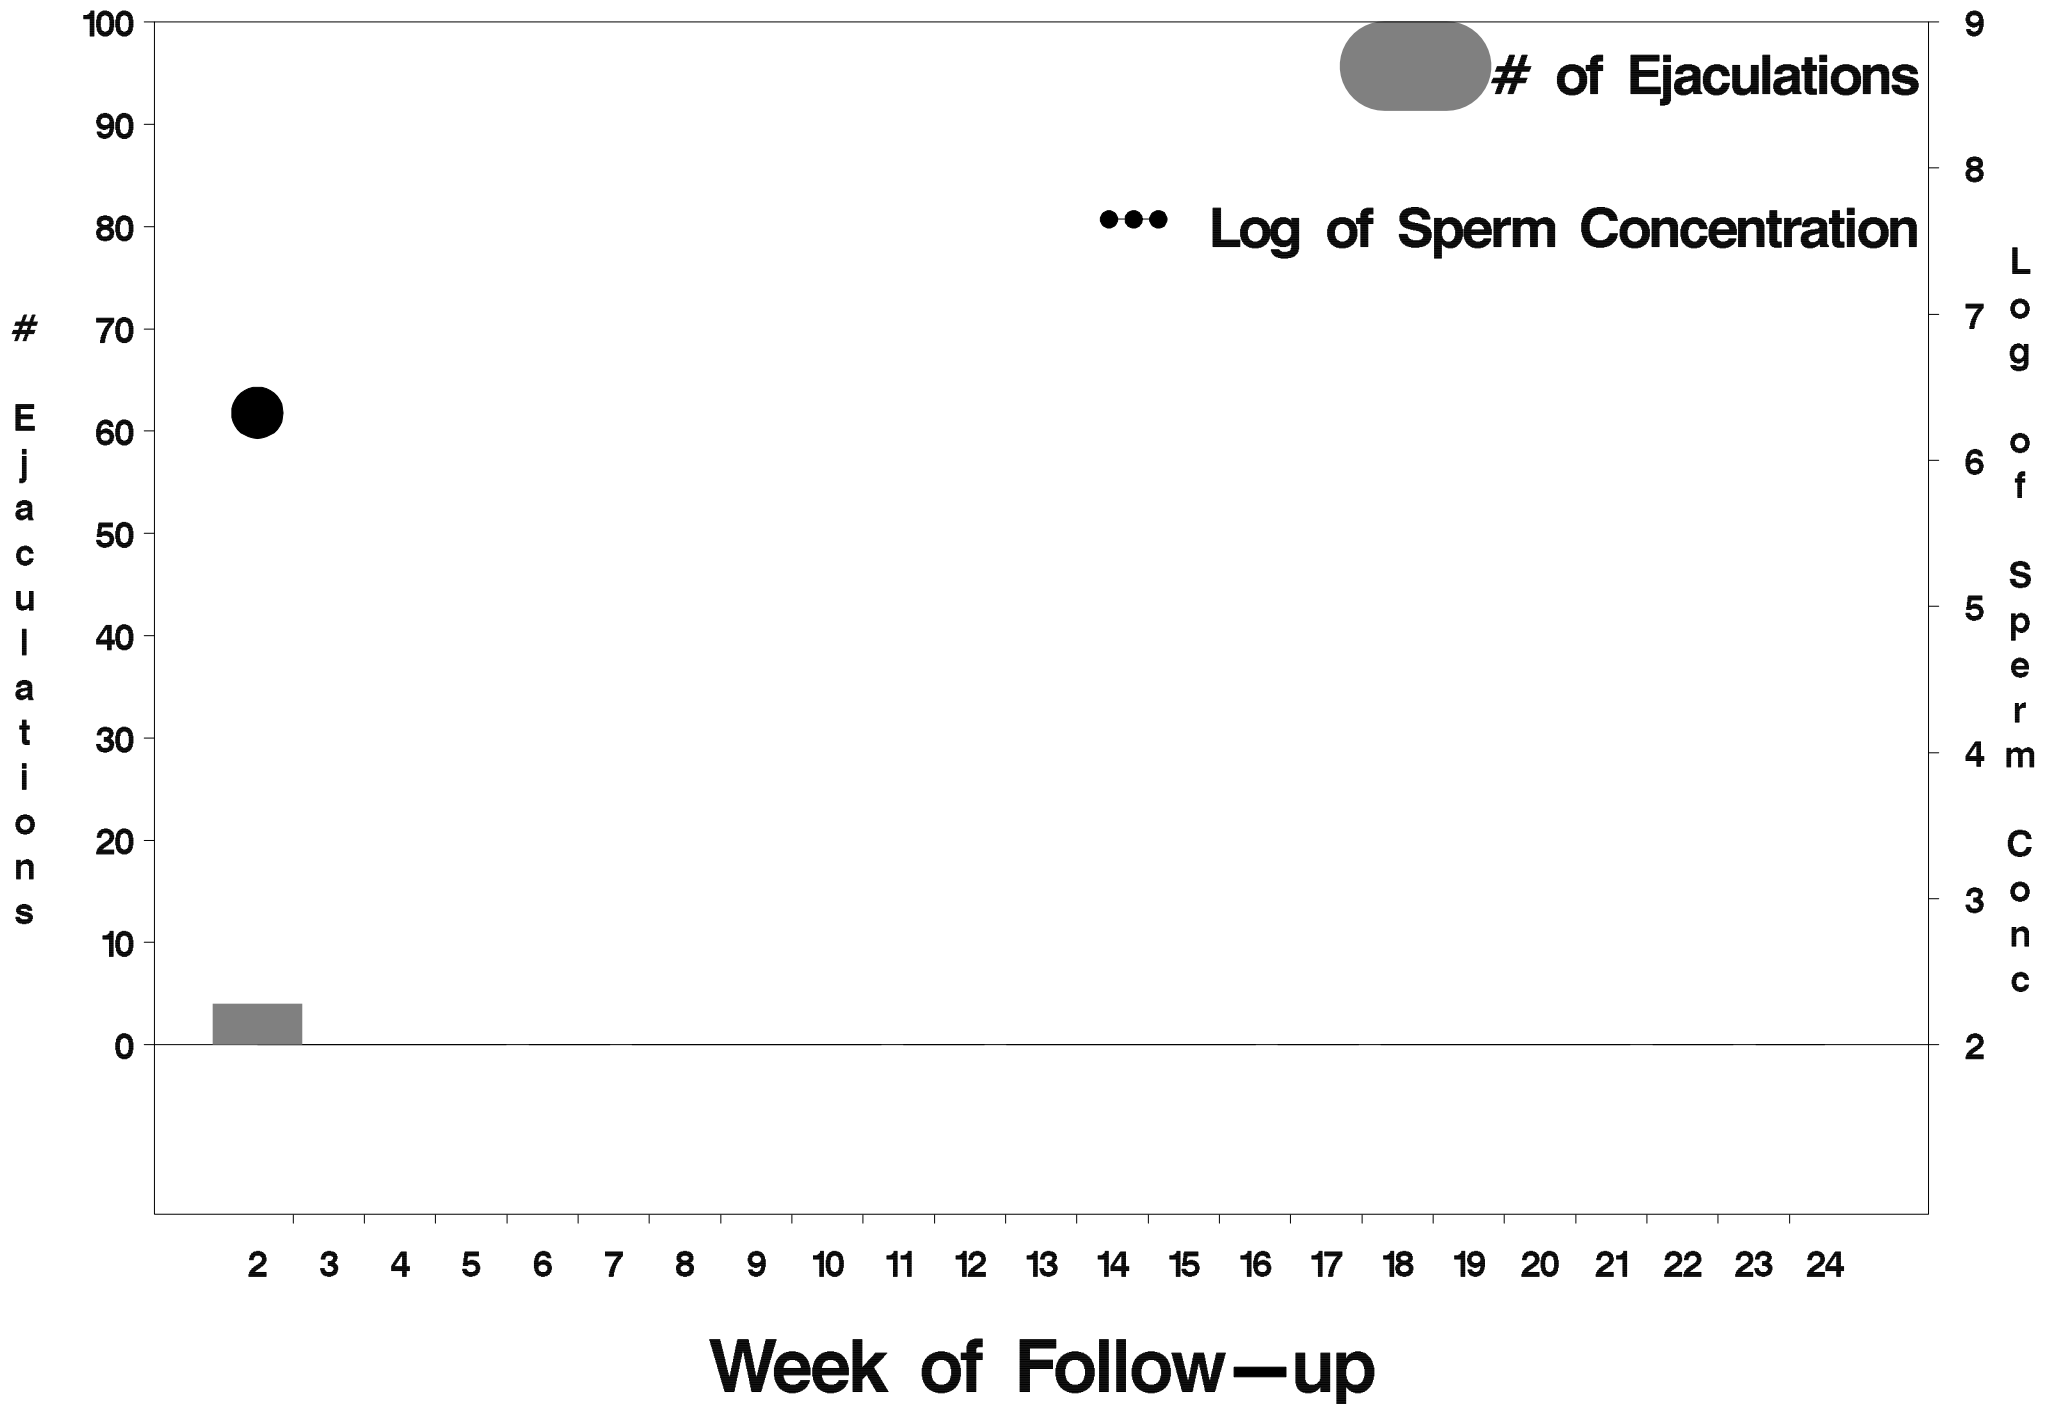



# Participant number= 755

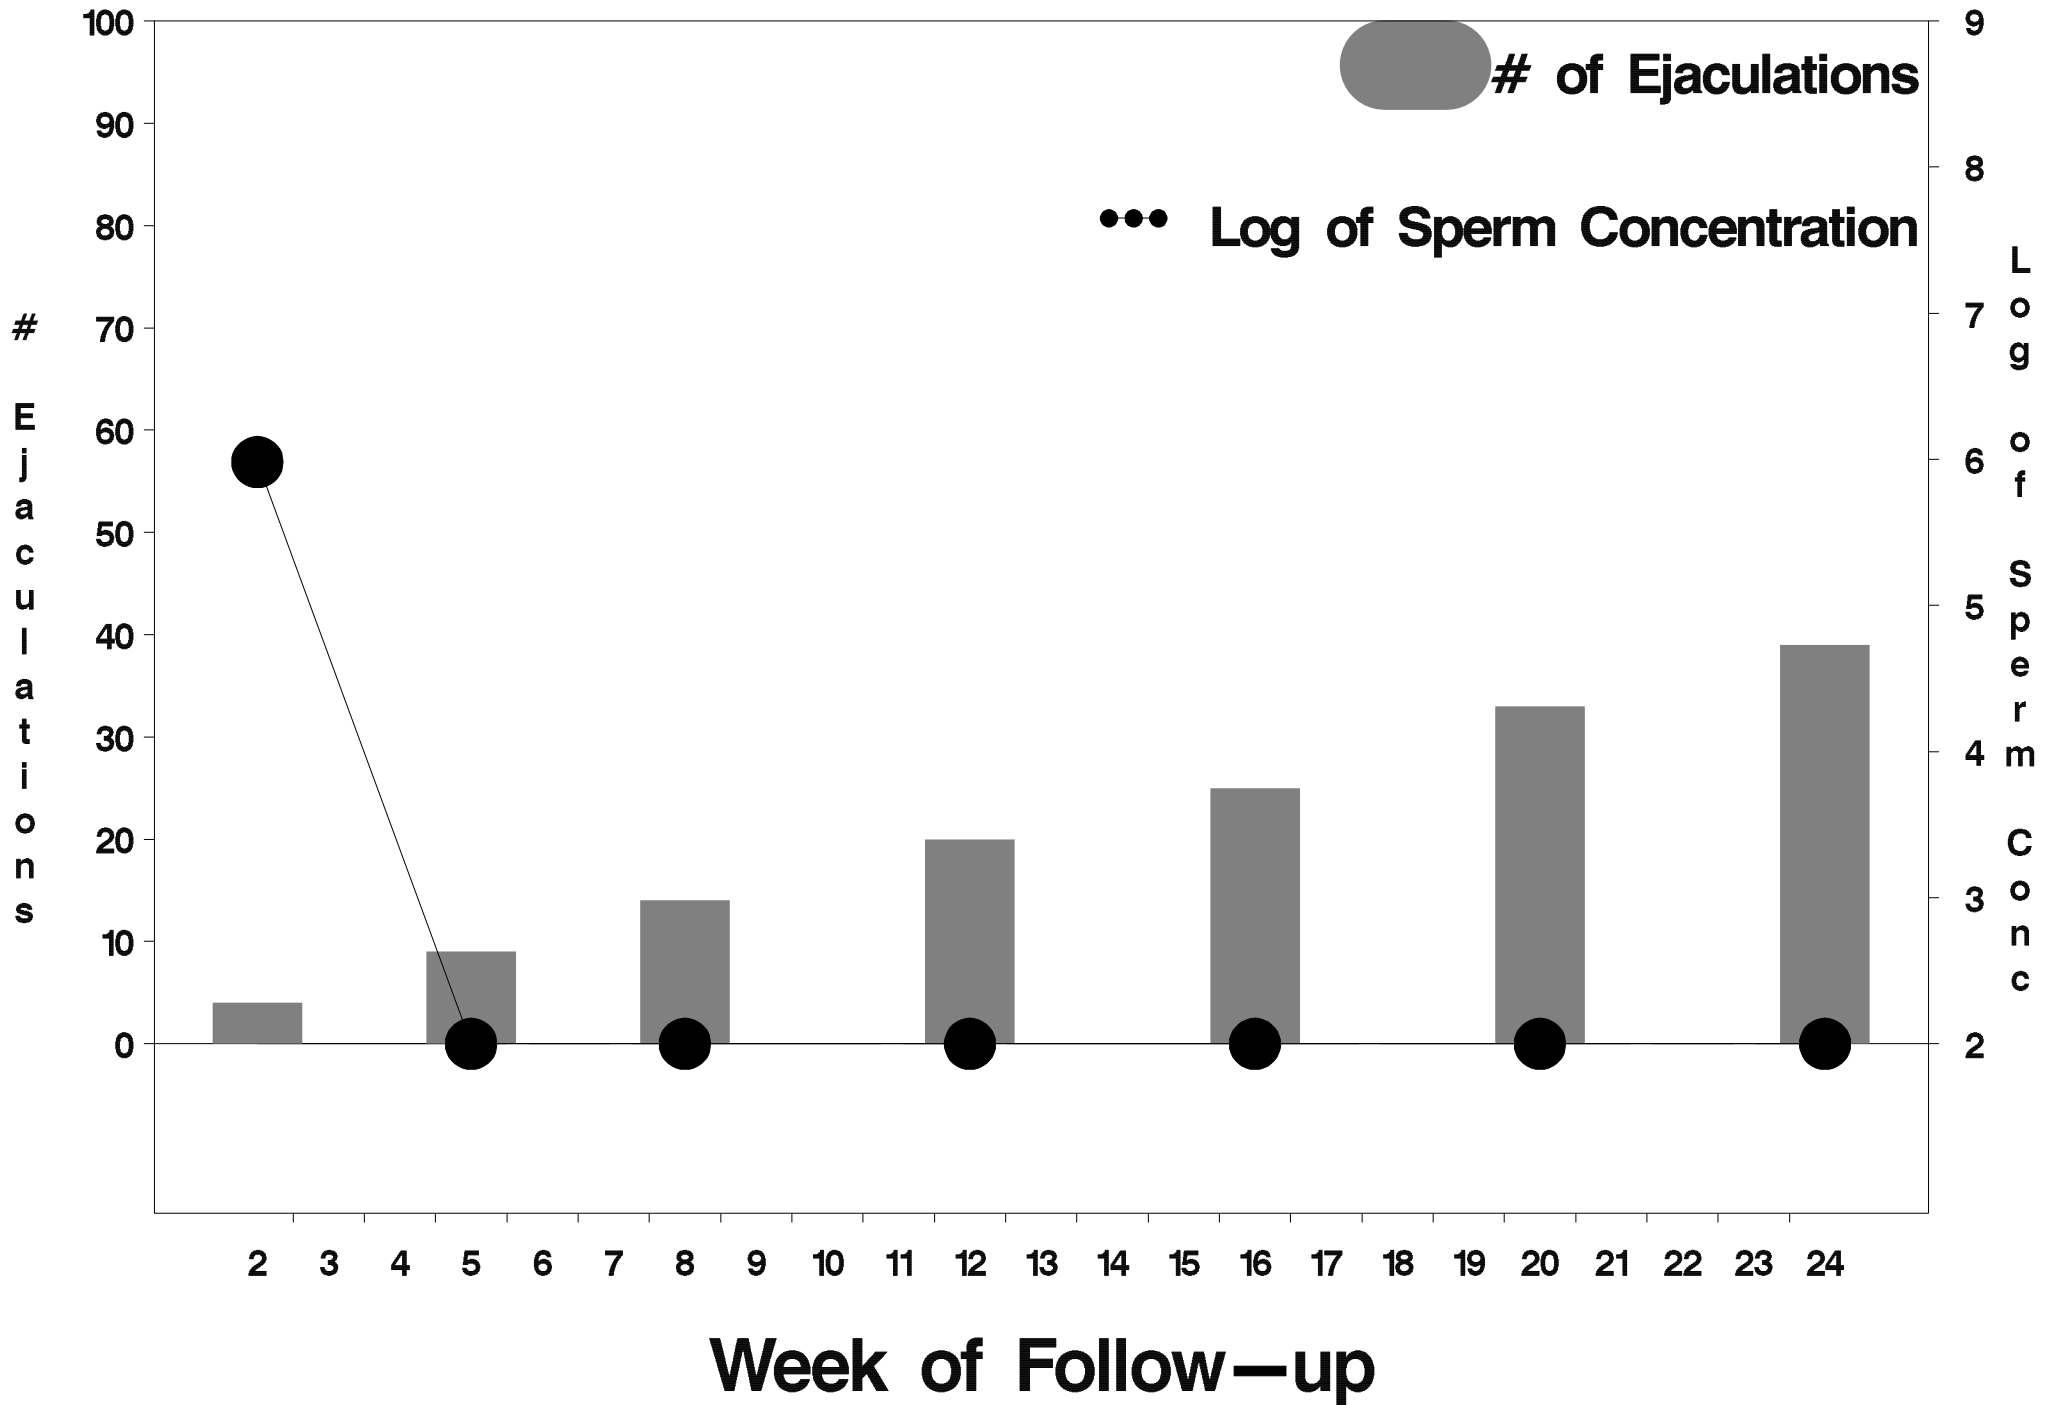

# Participant number= 756

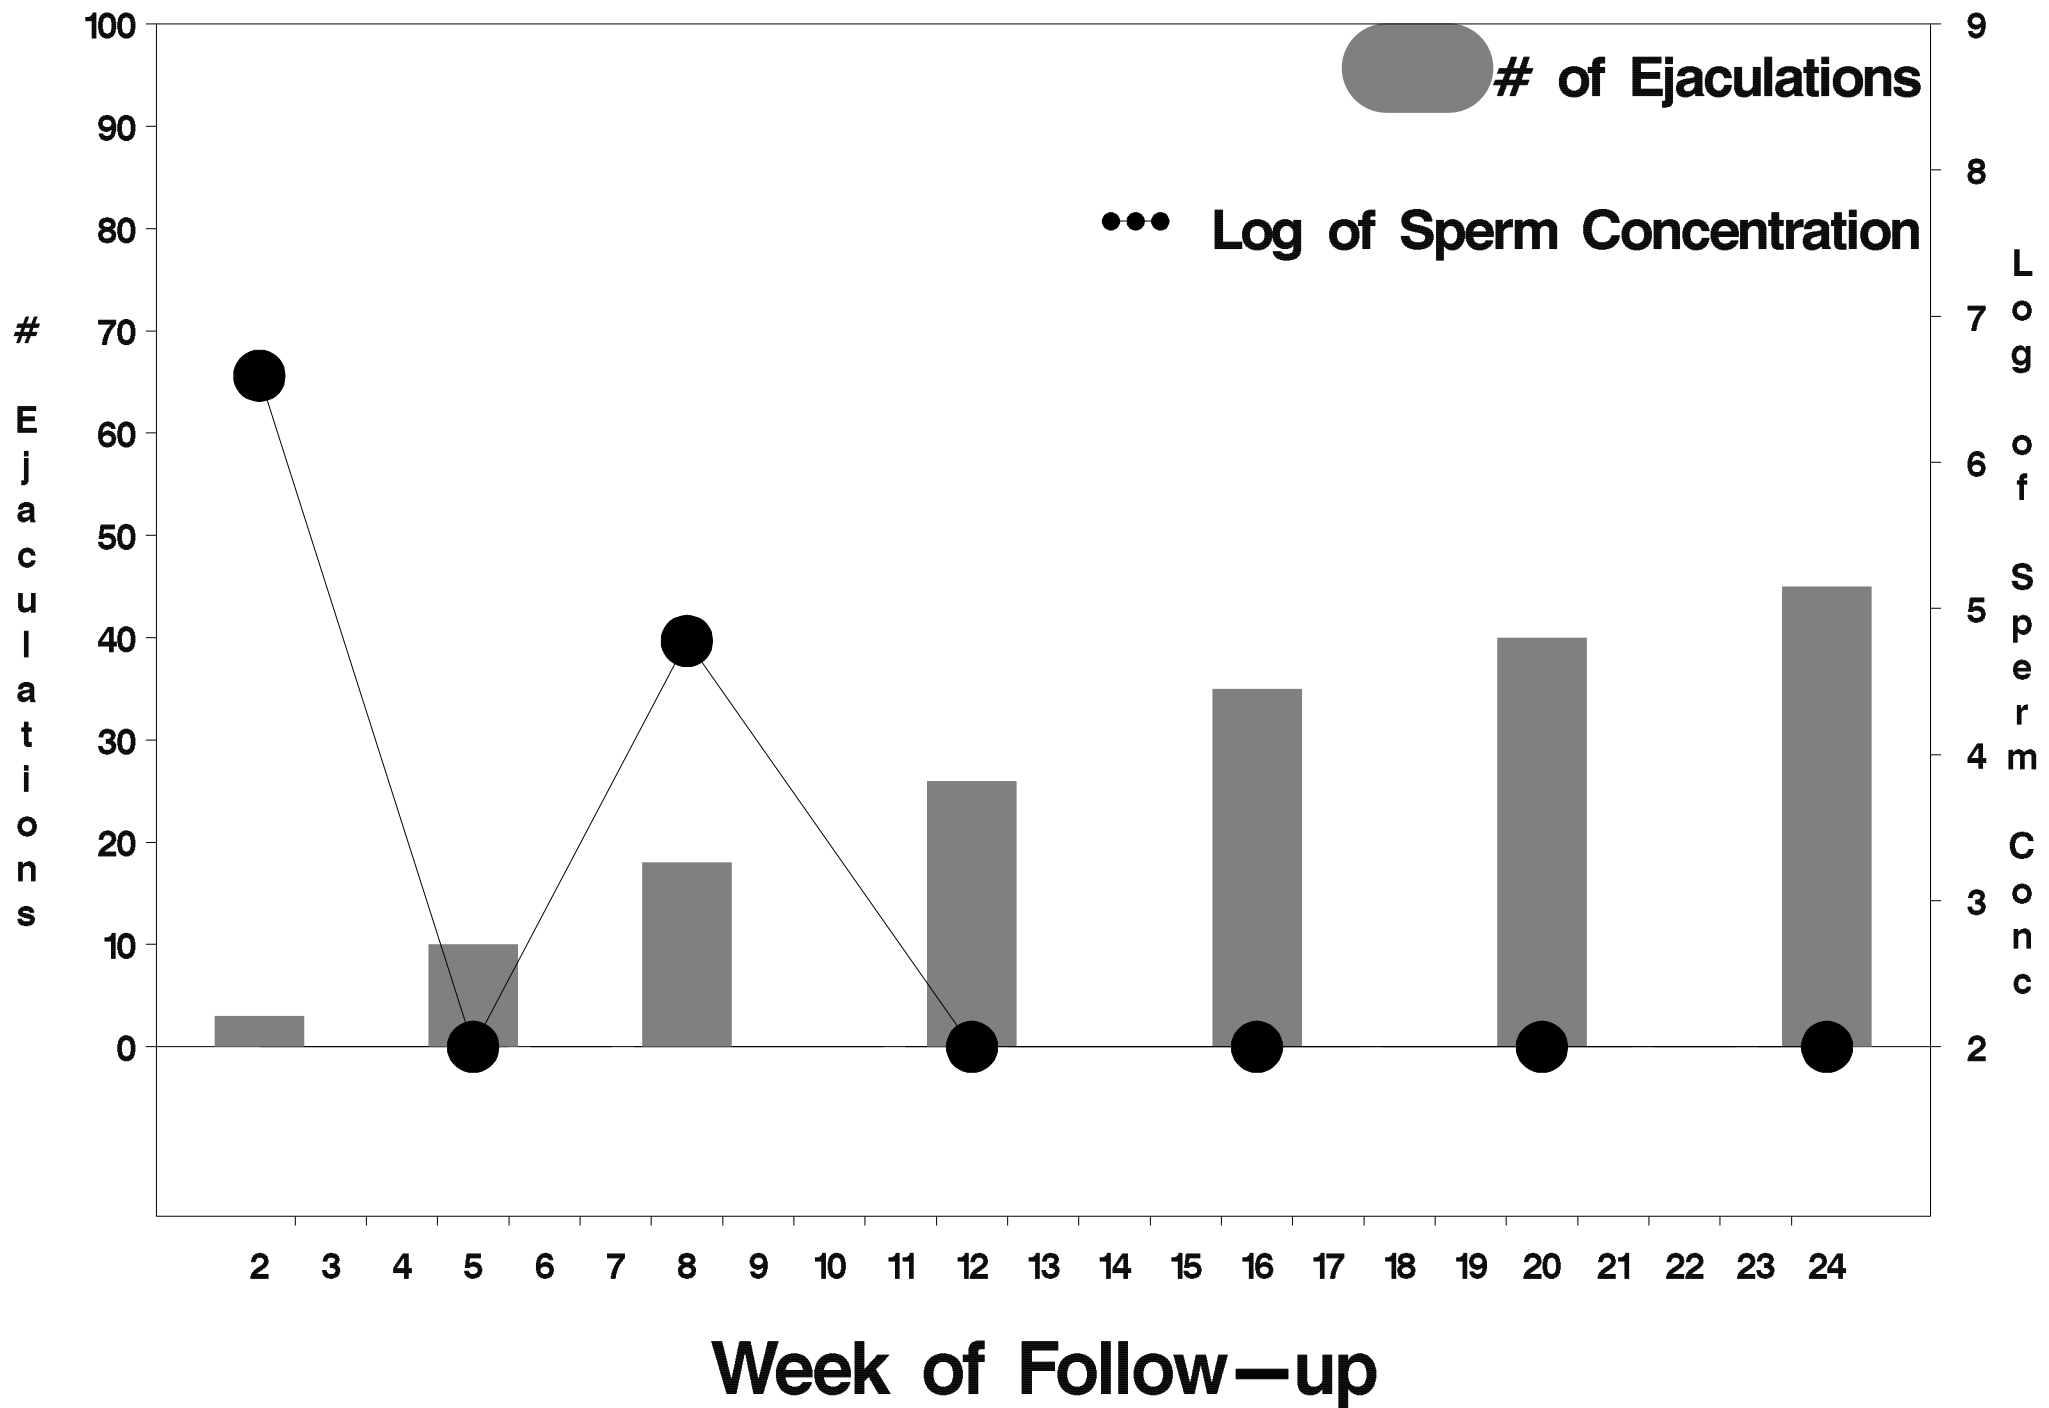

# Participant number= 757

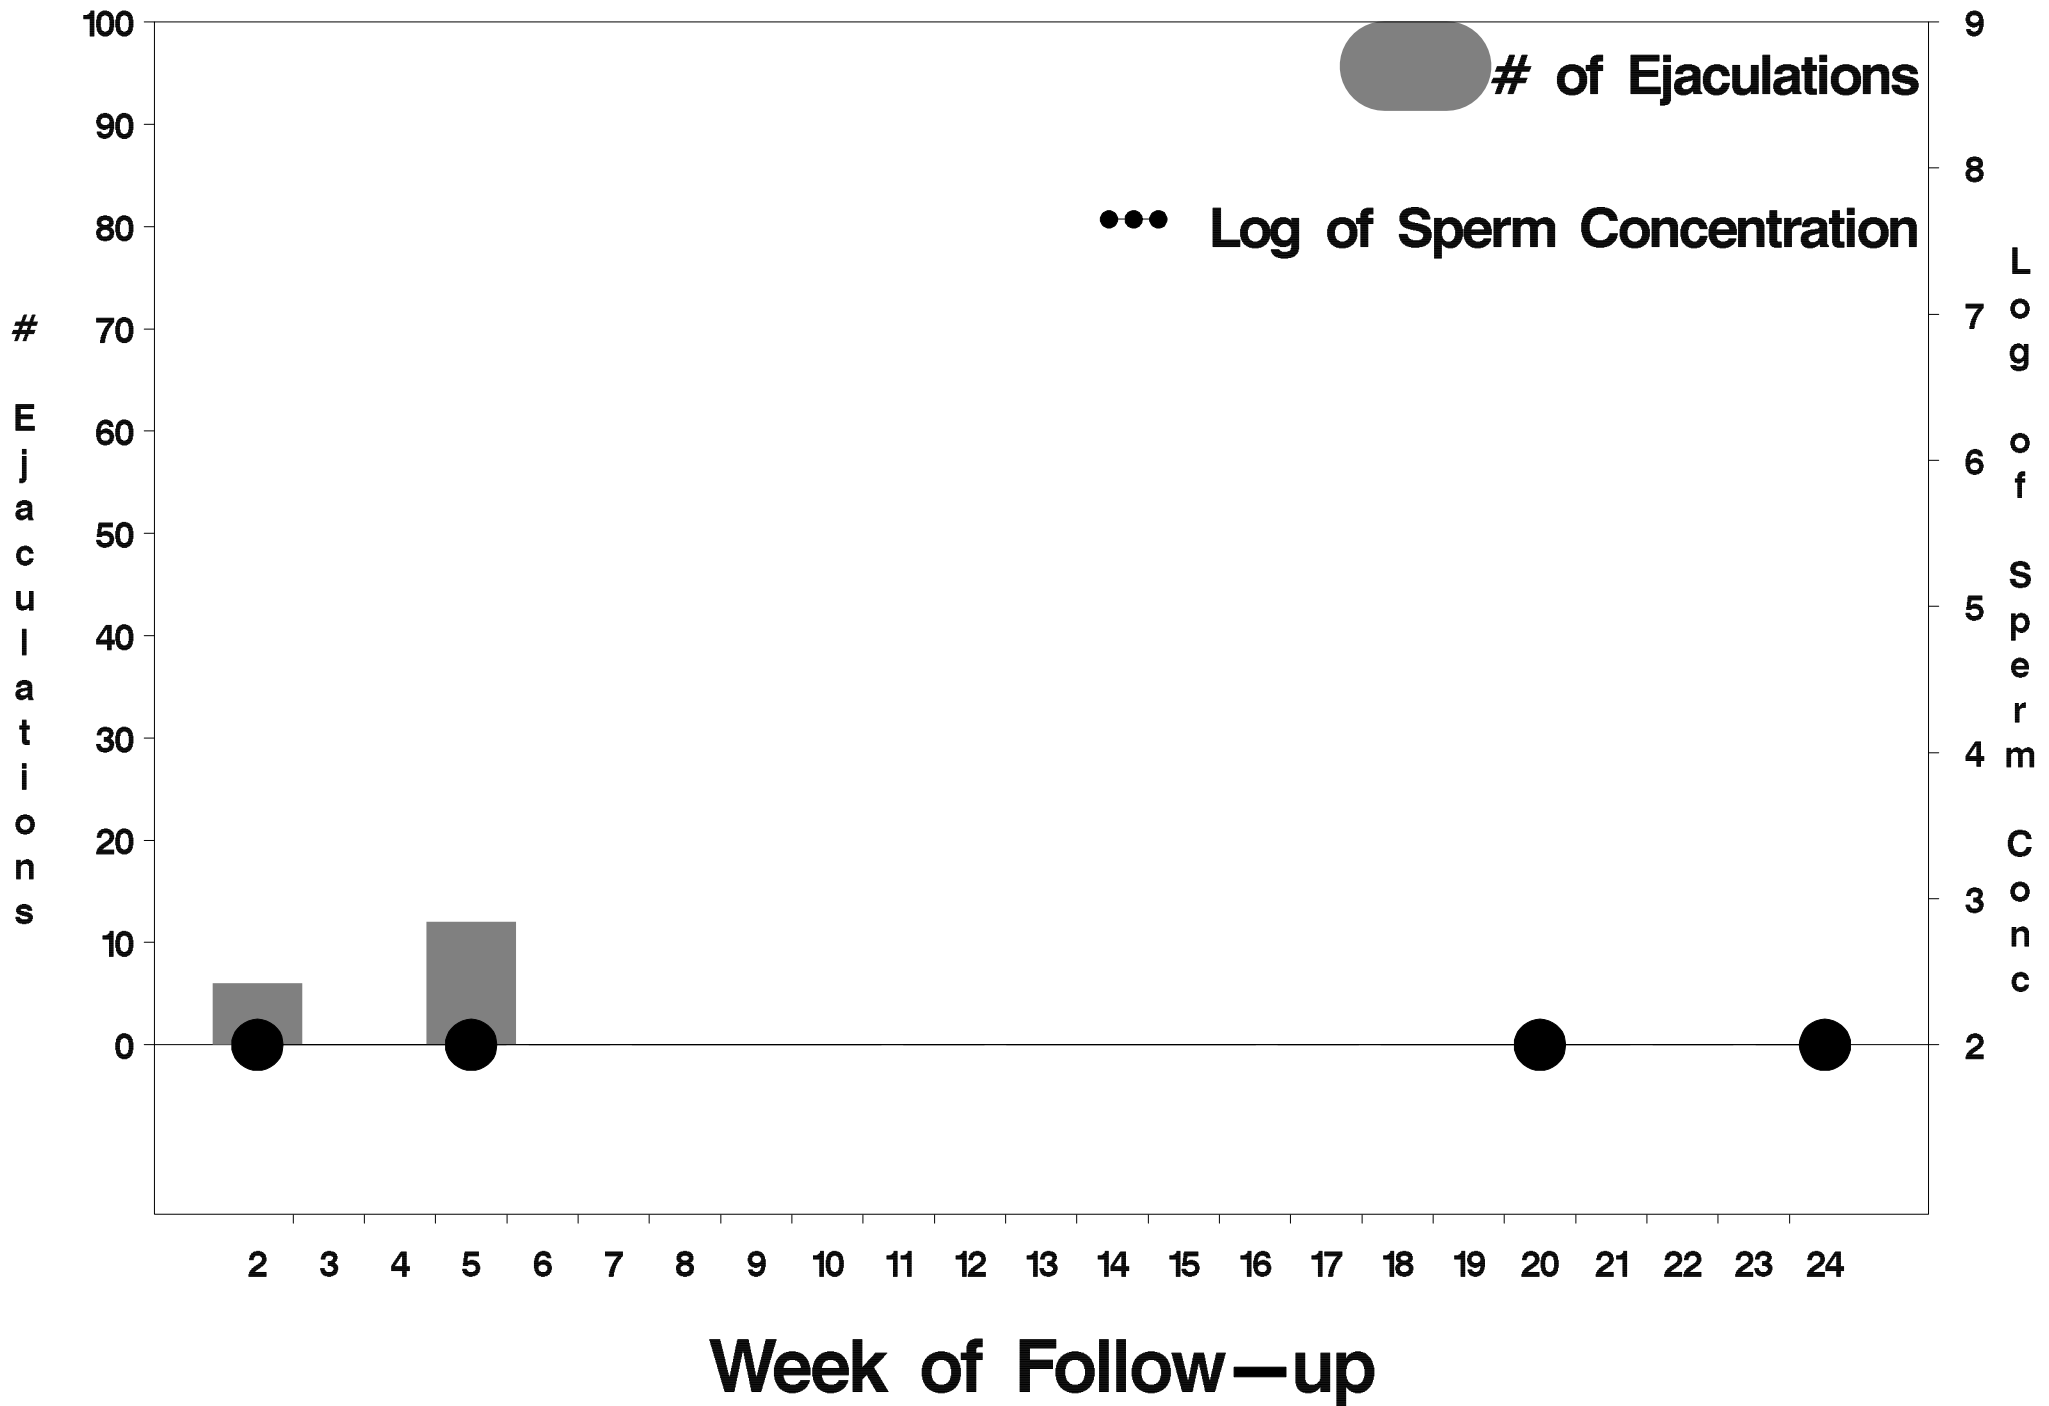

# Participant number= 758

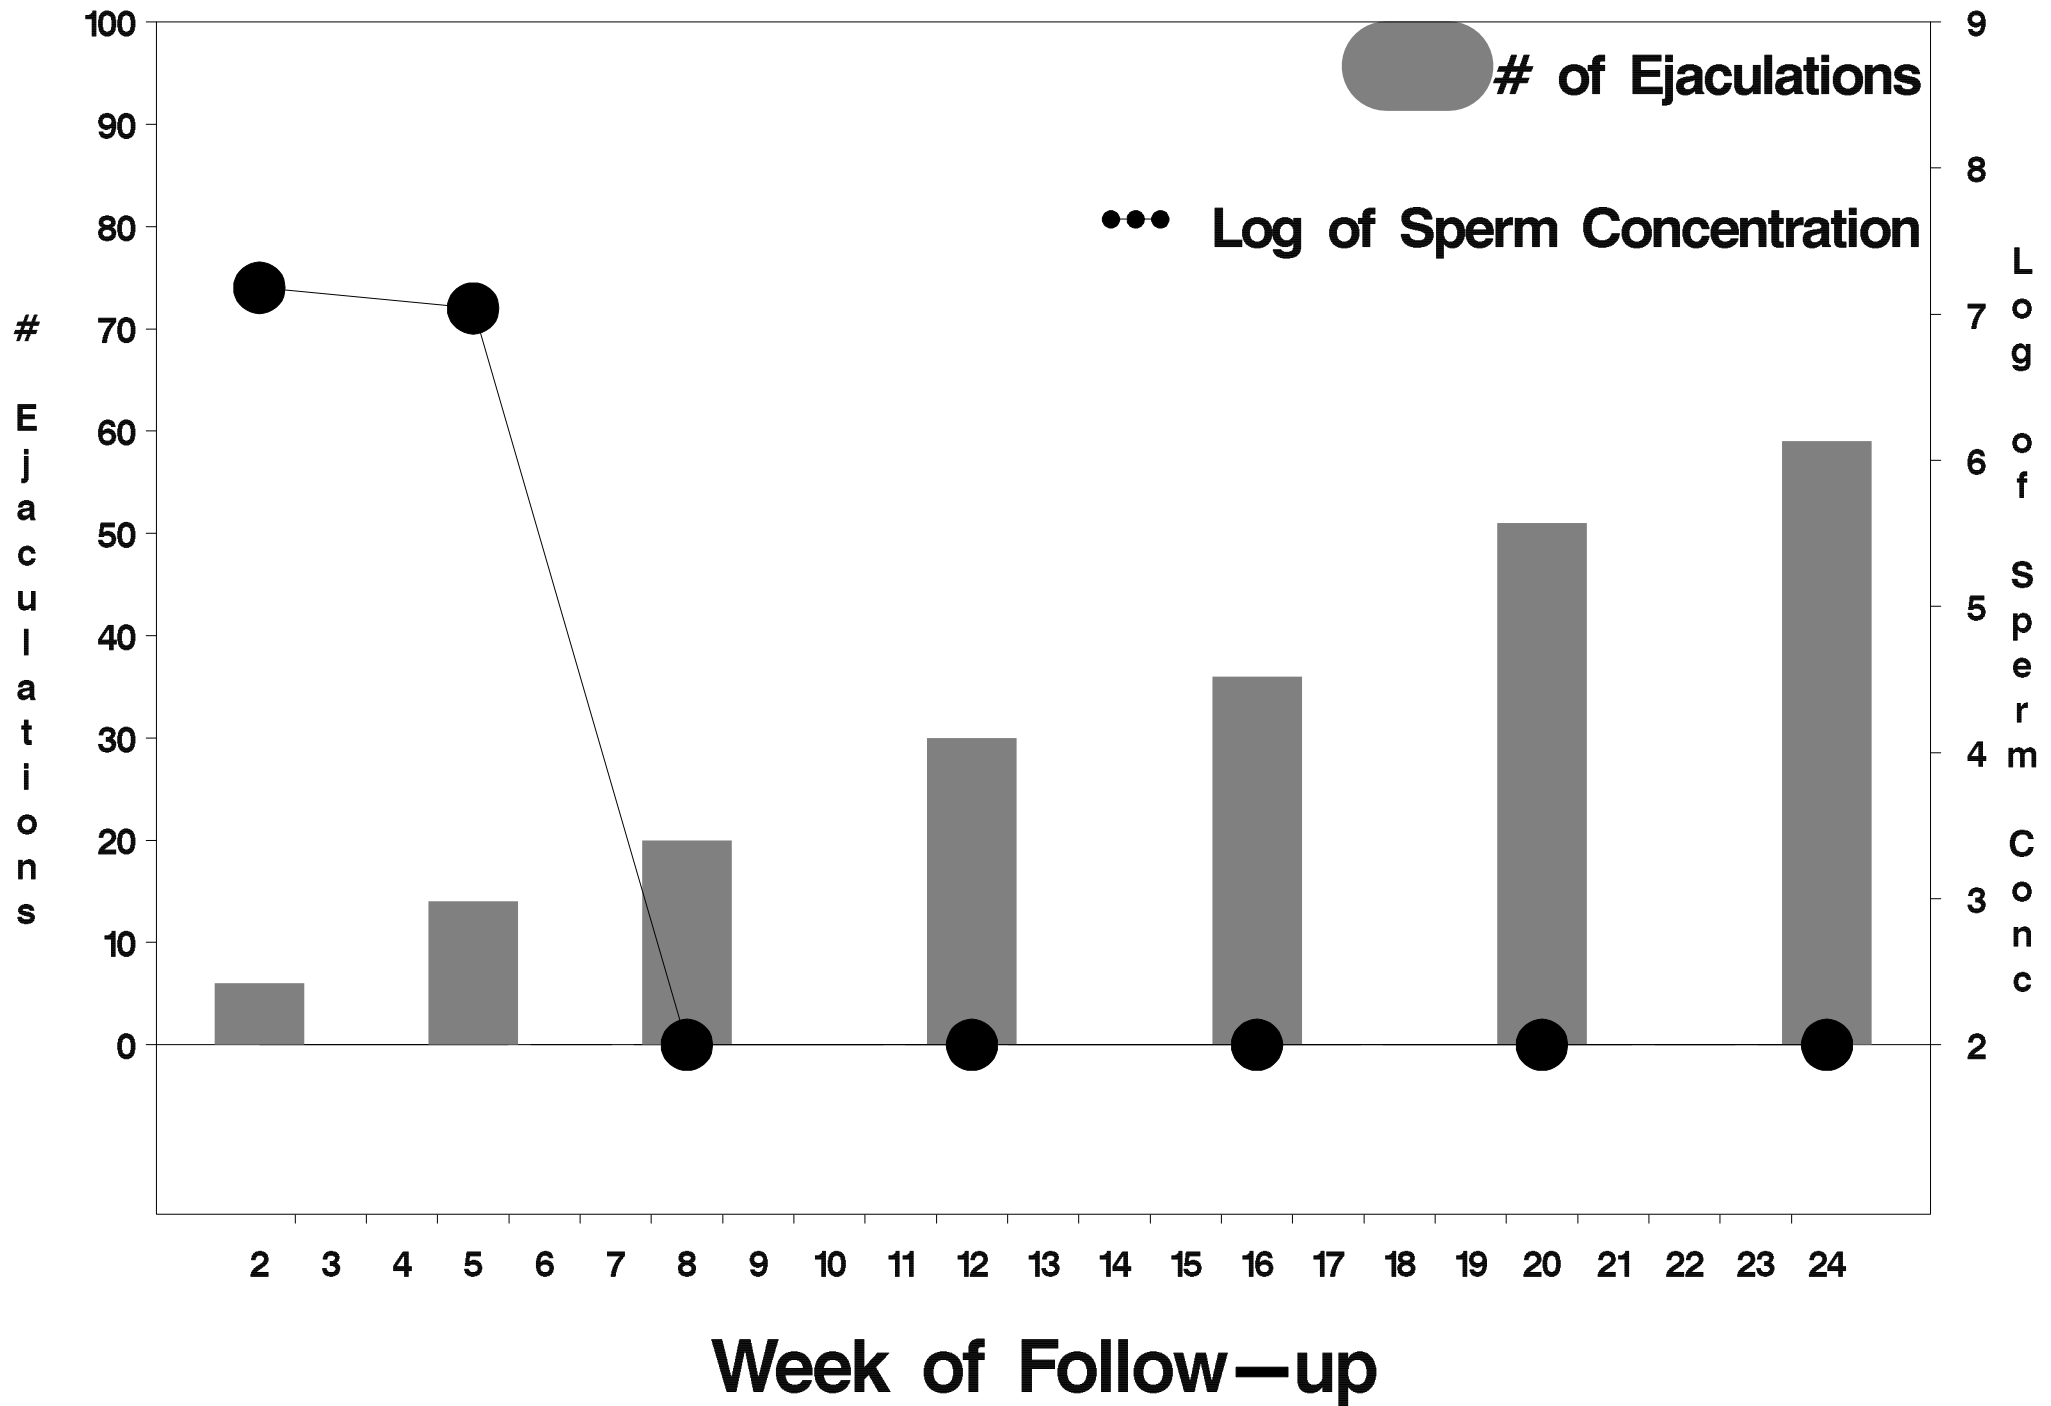

# Participant number= 759

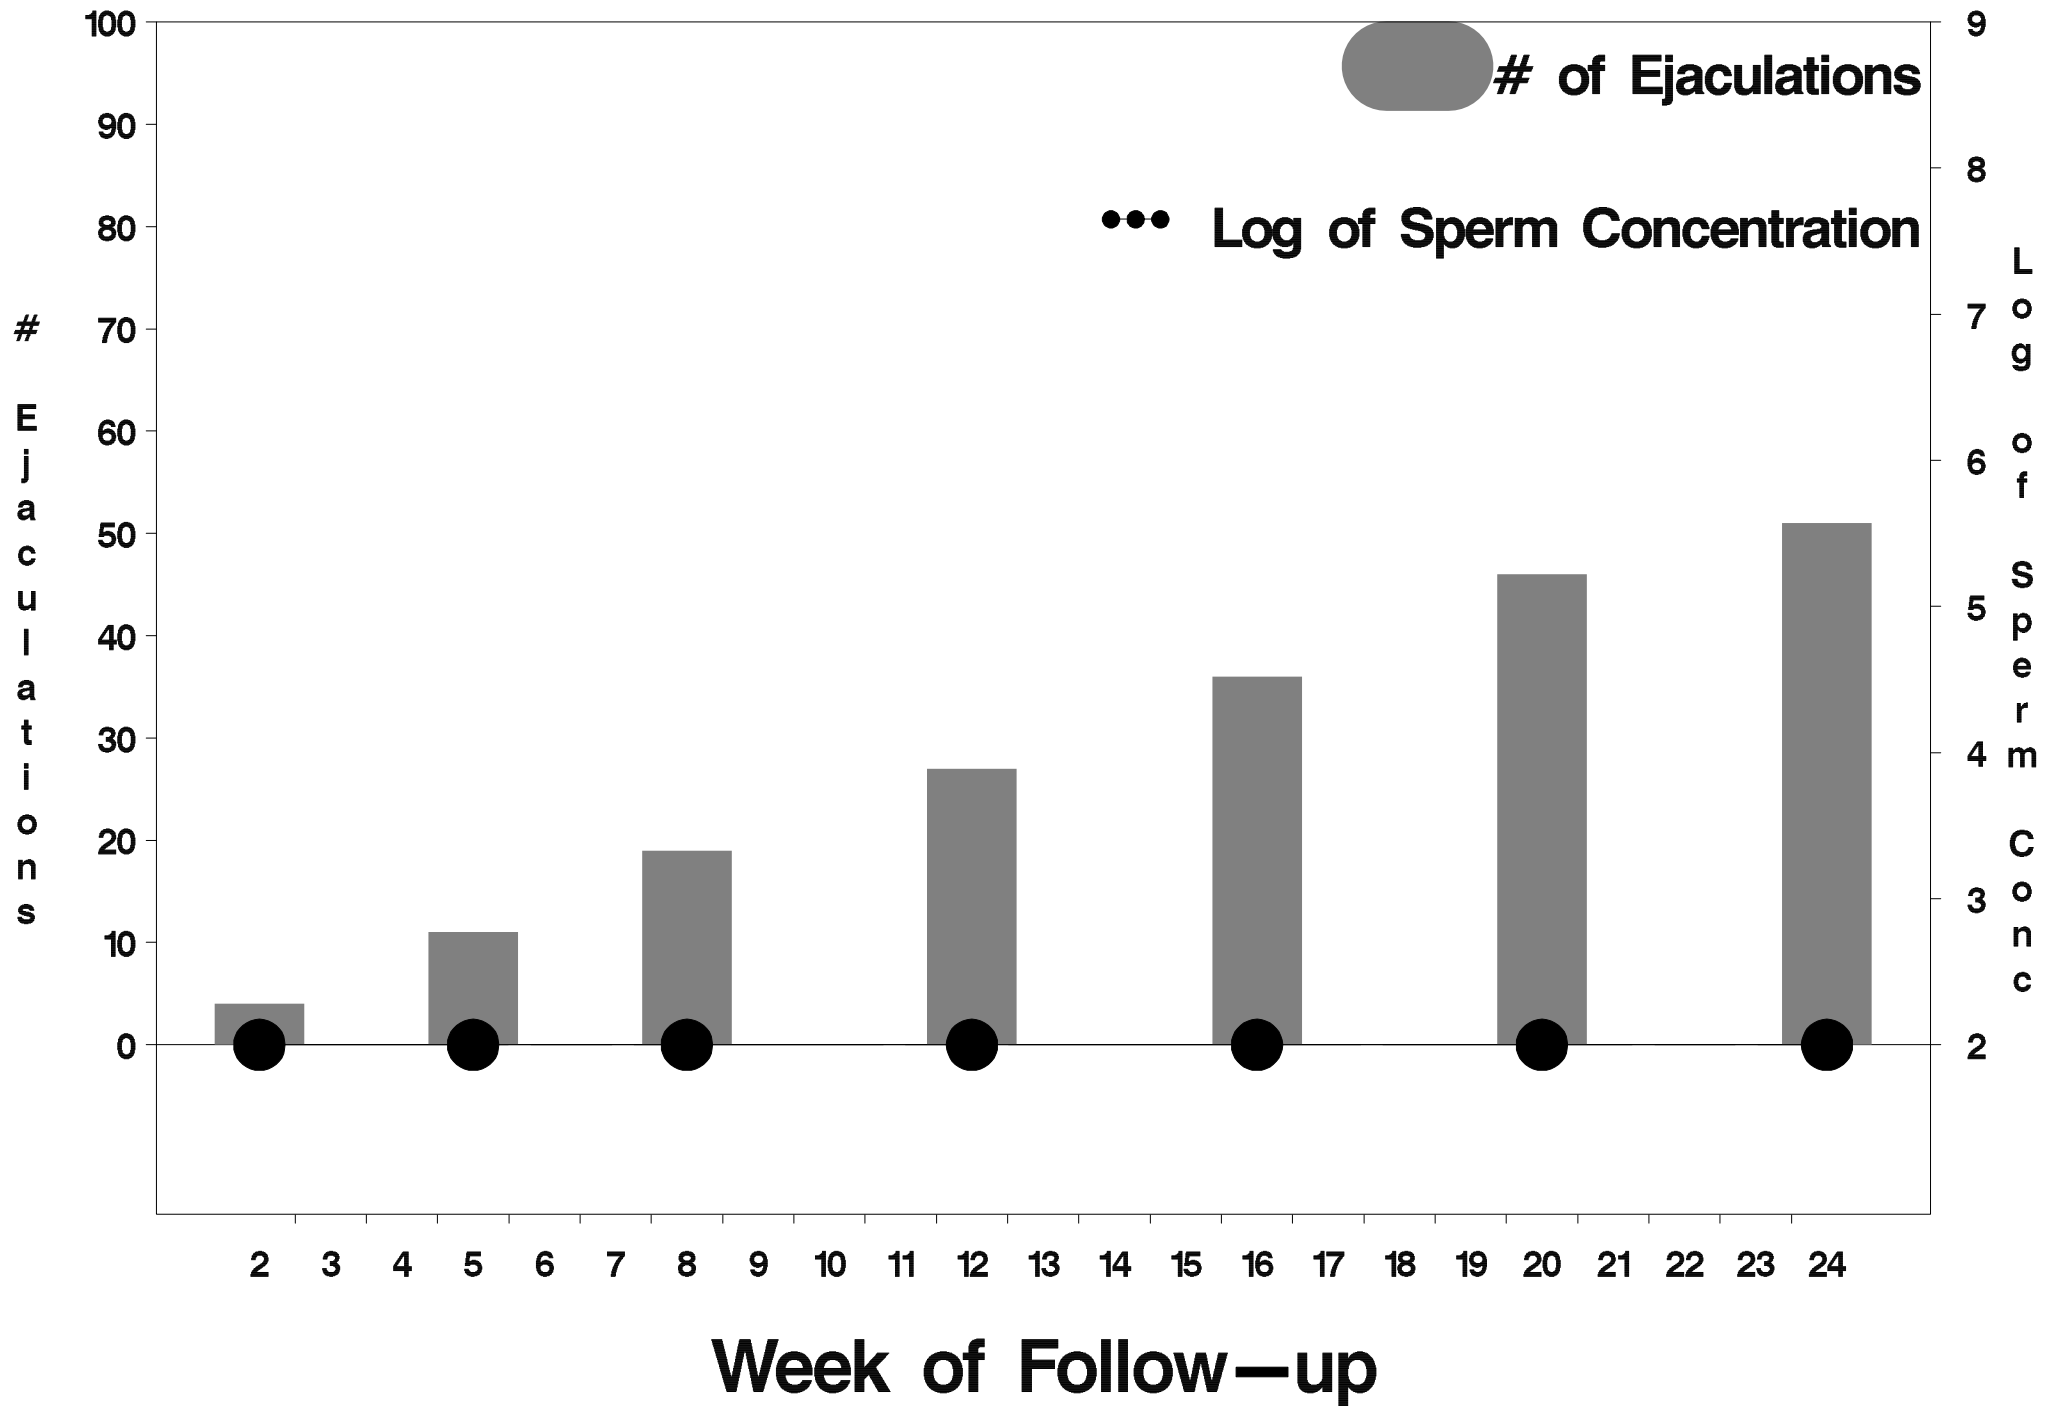

# Participant number= 760

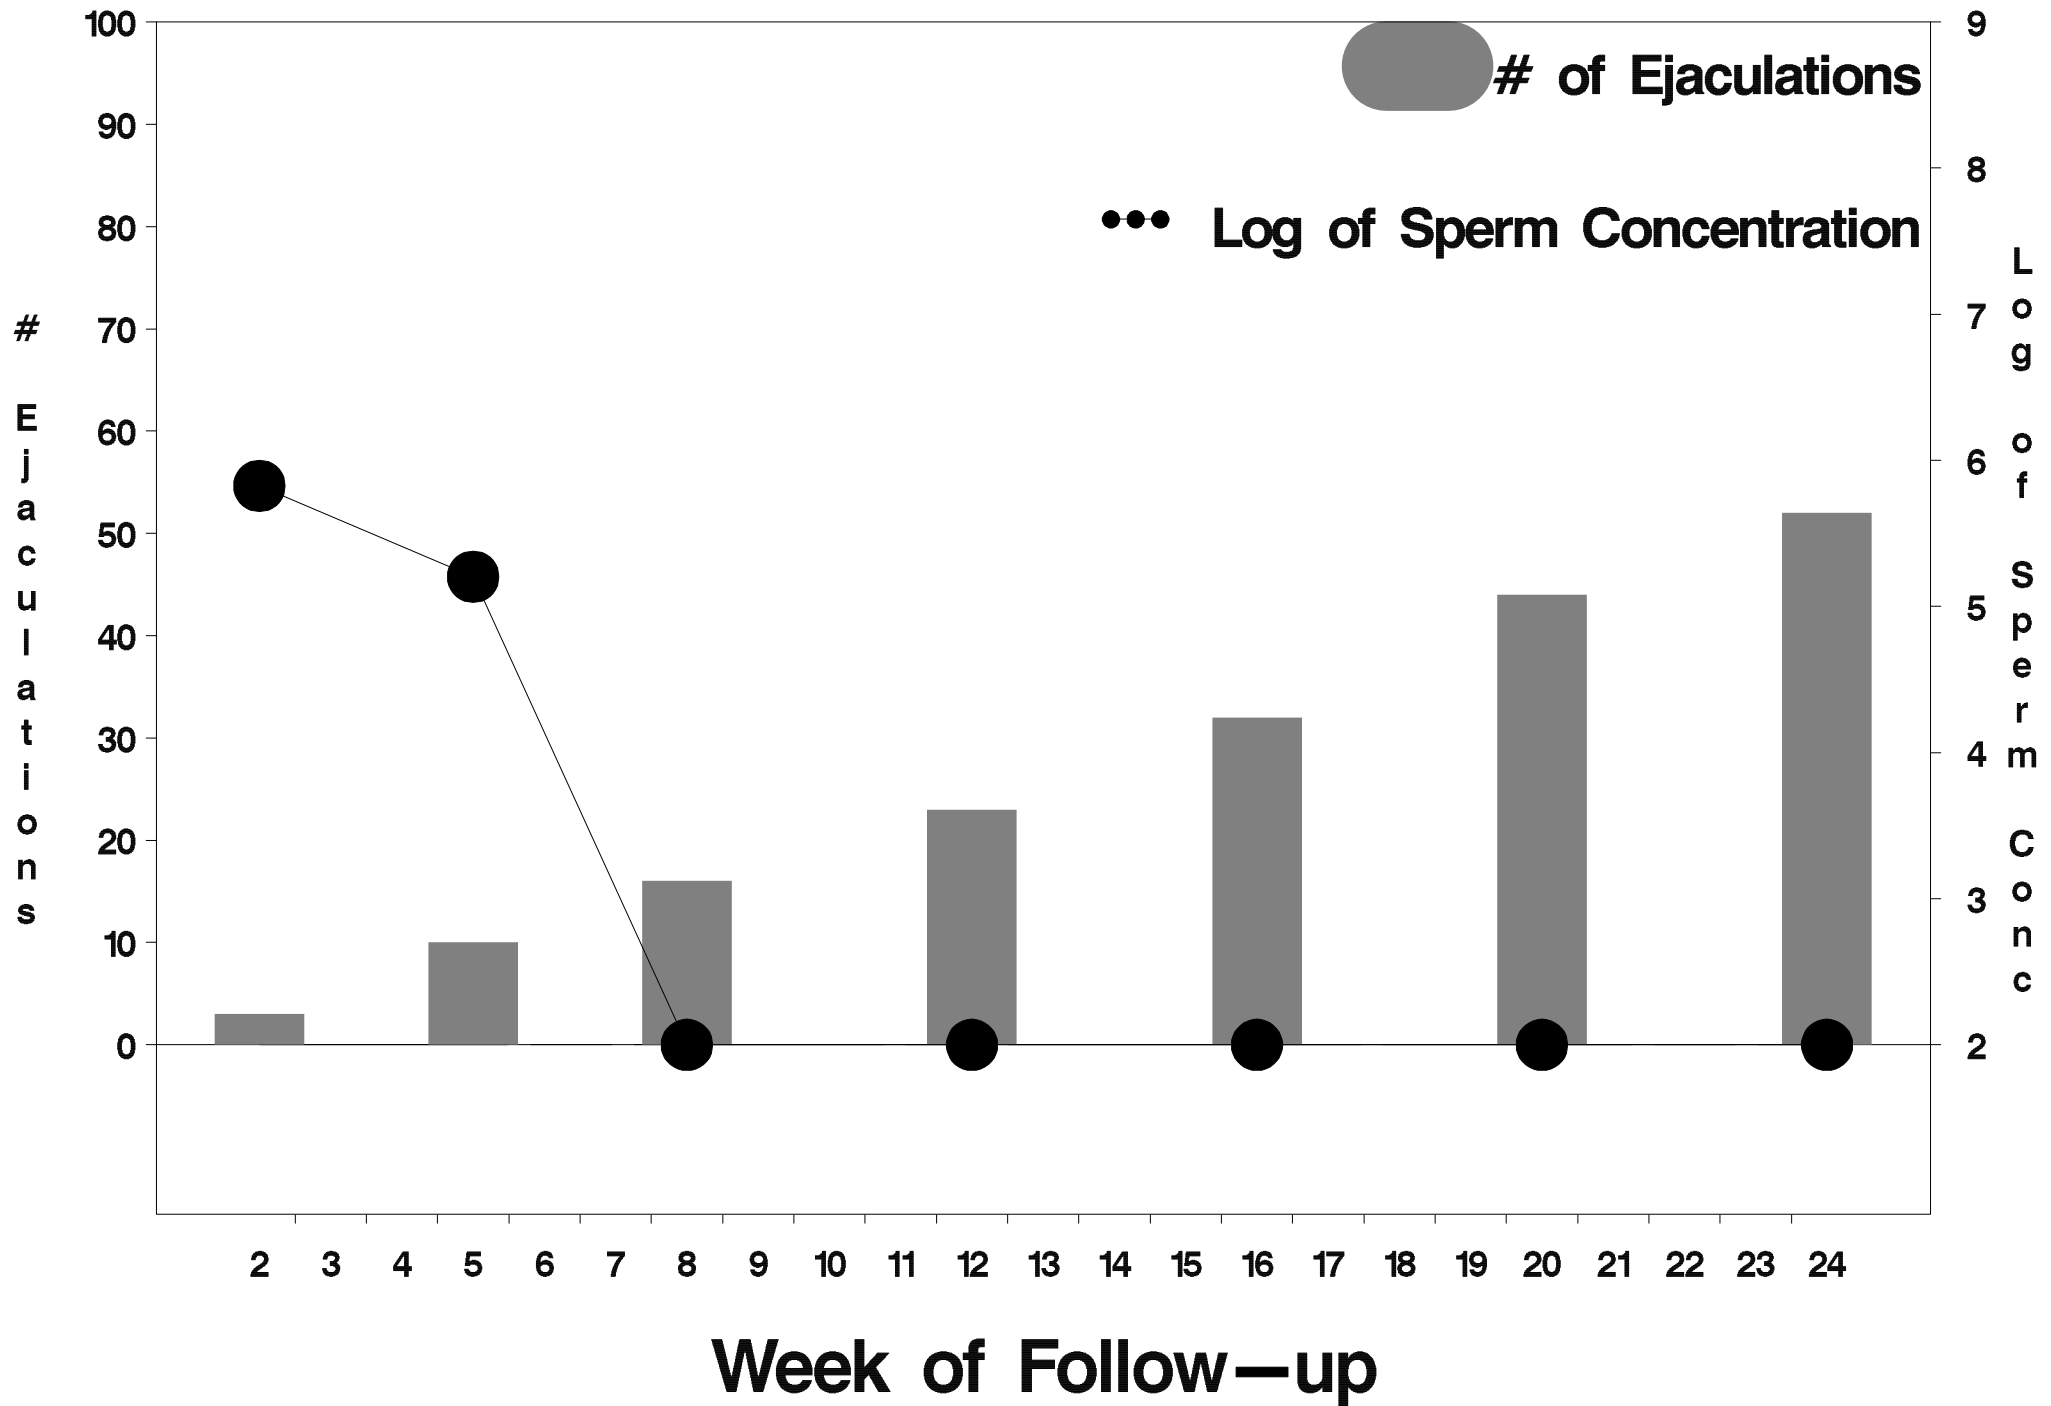

# Participant number= 761

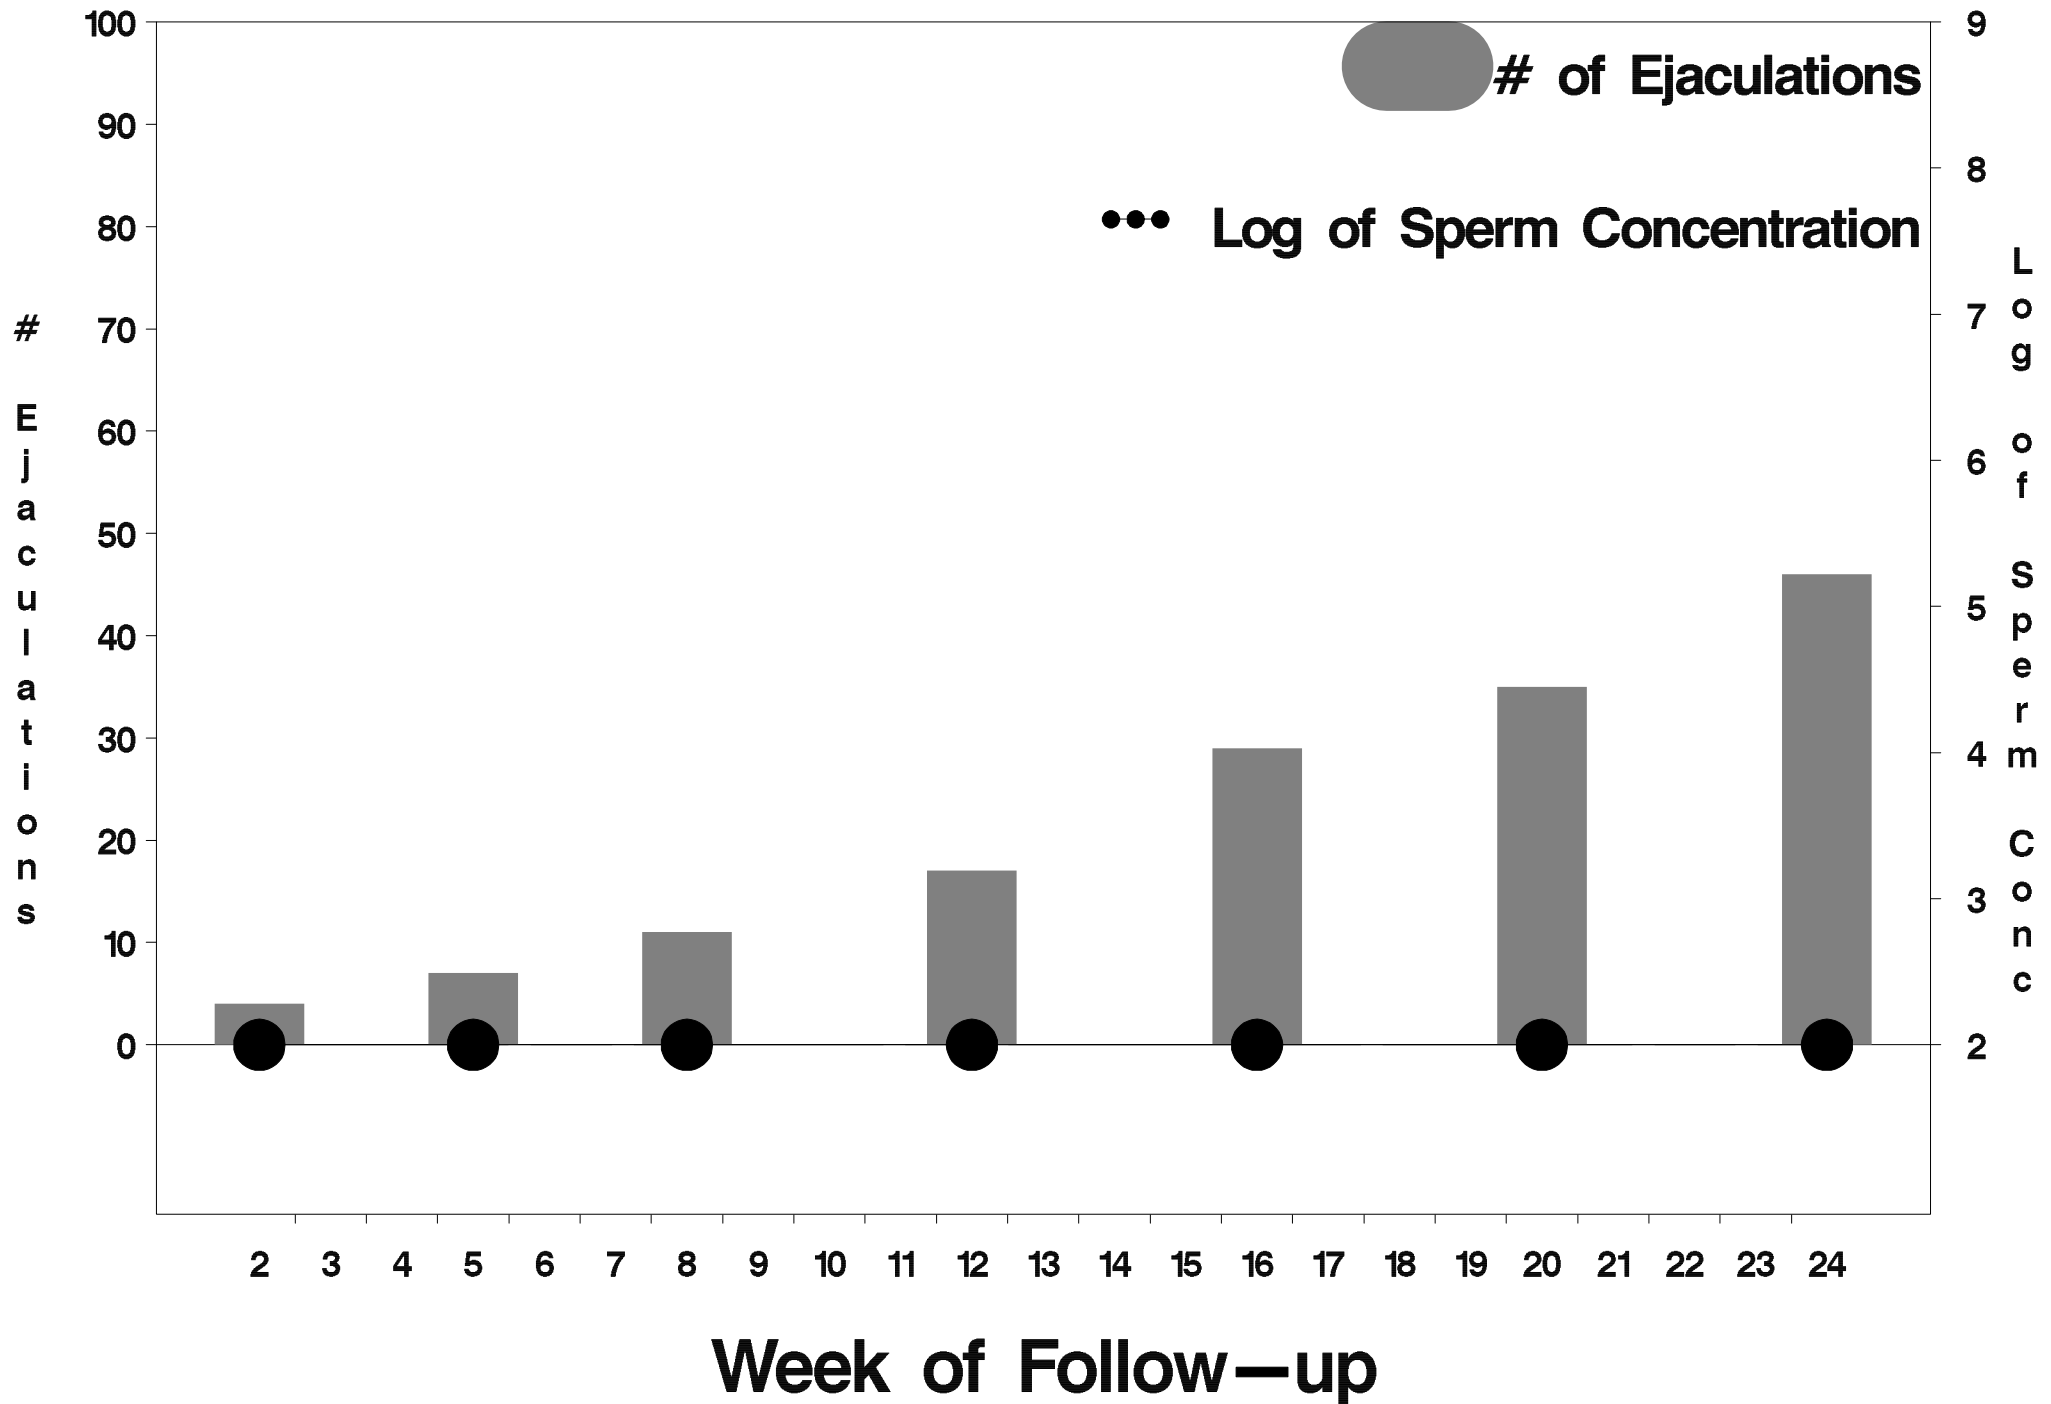

# Participant number= 762

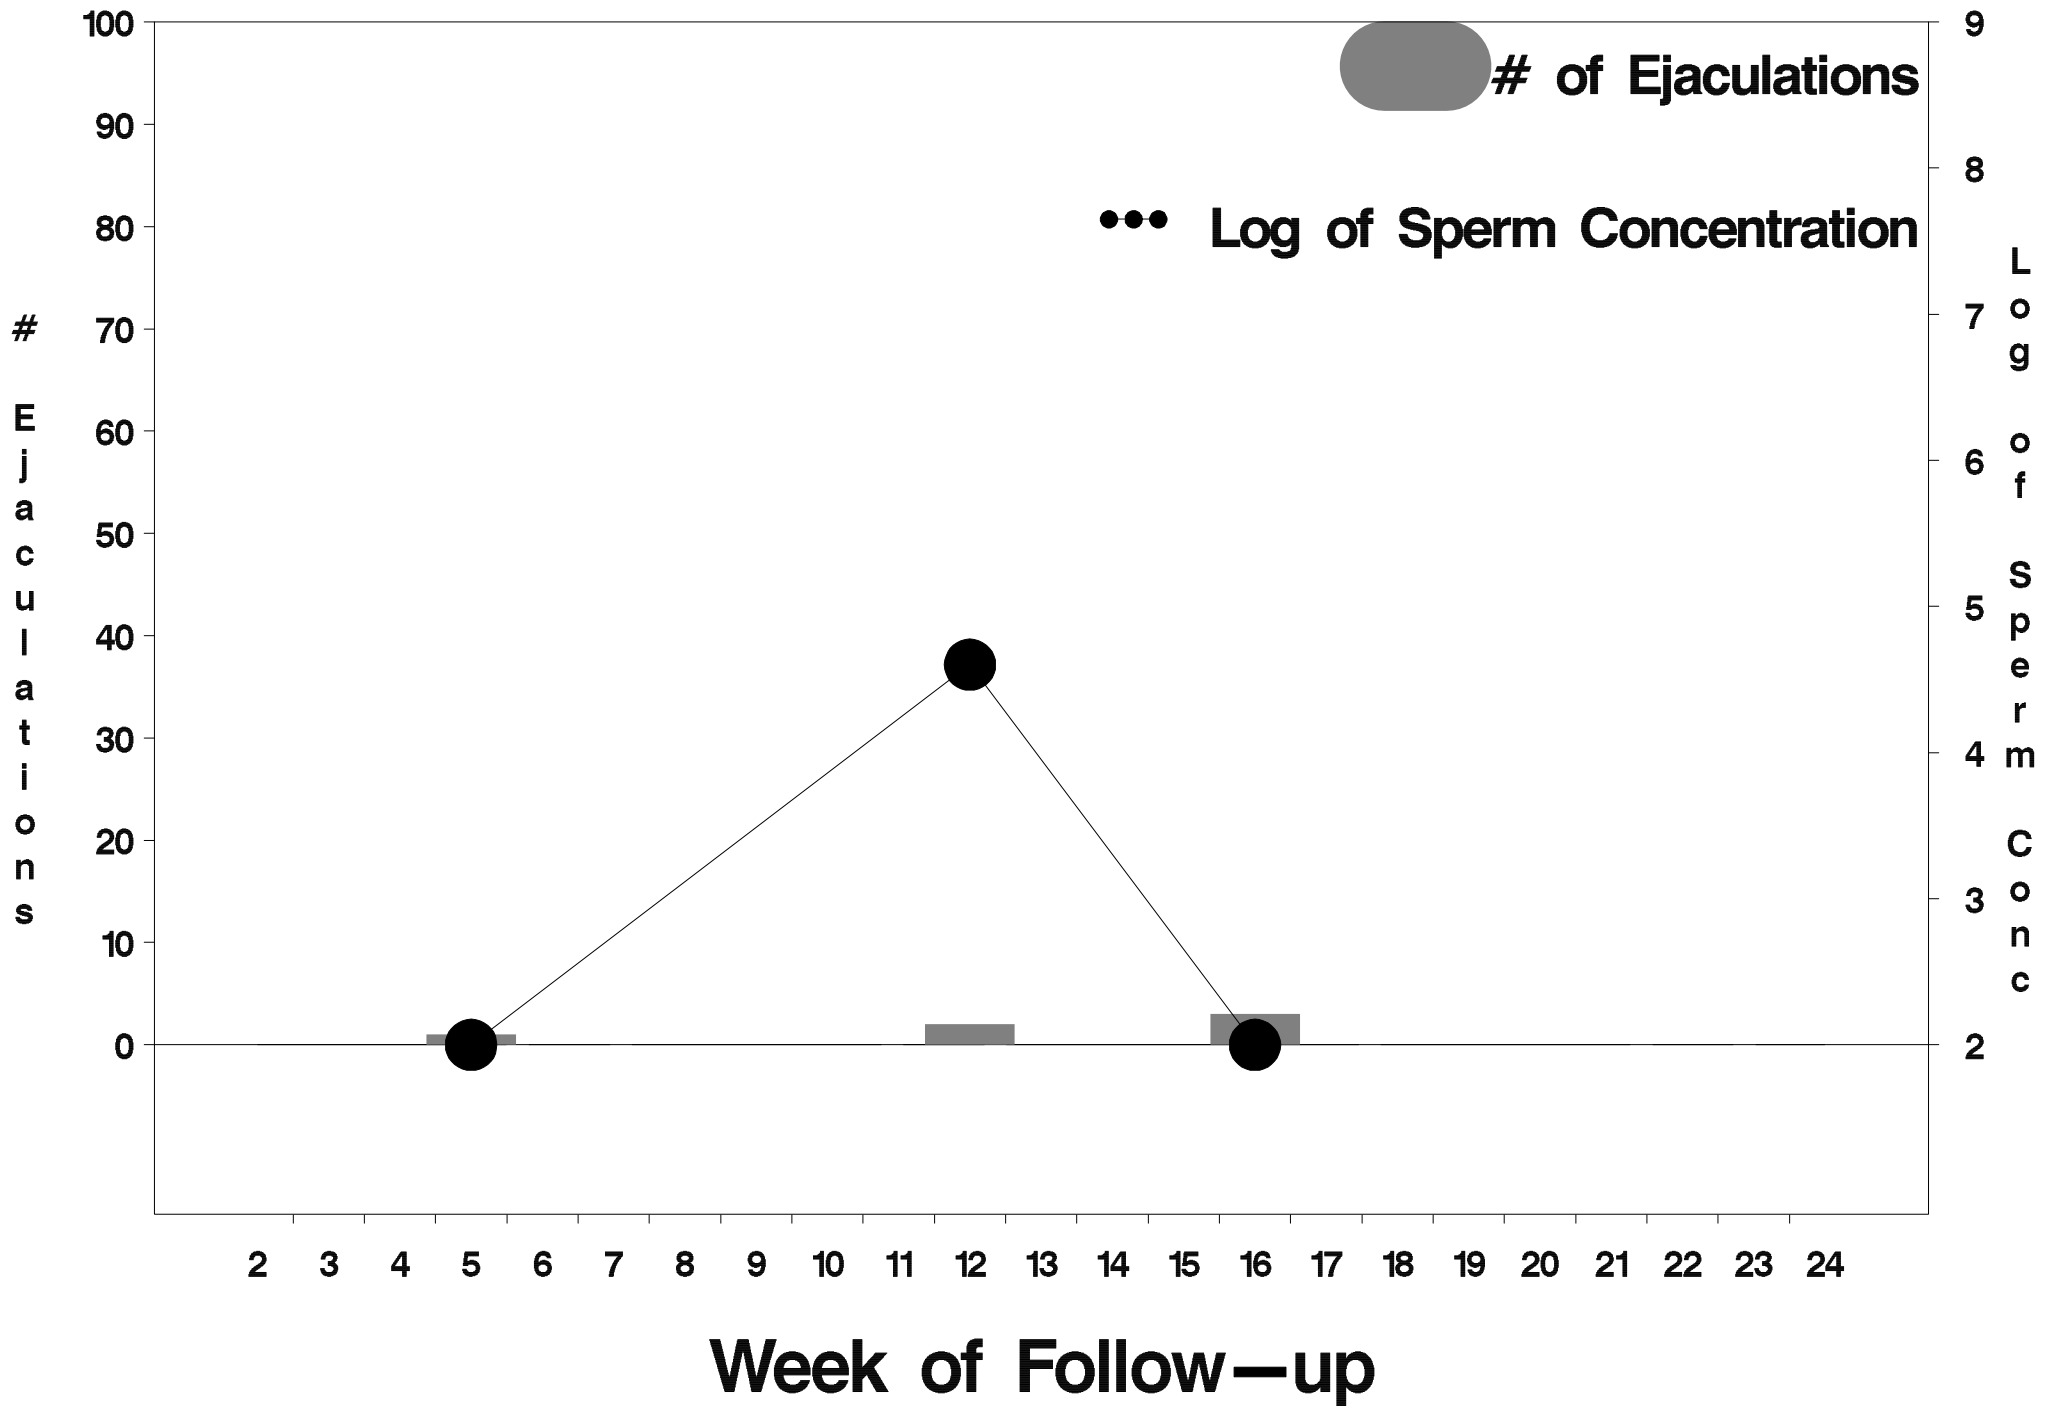



# Participant number= 763

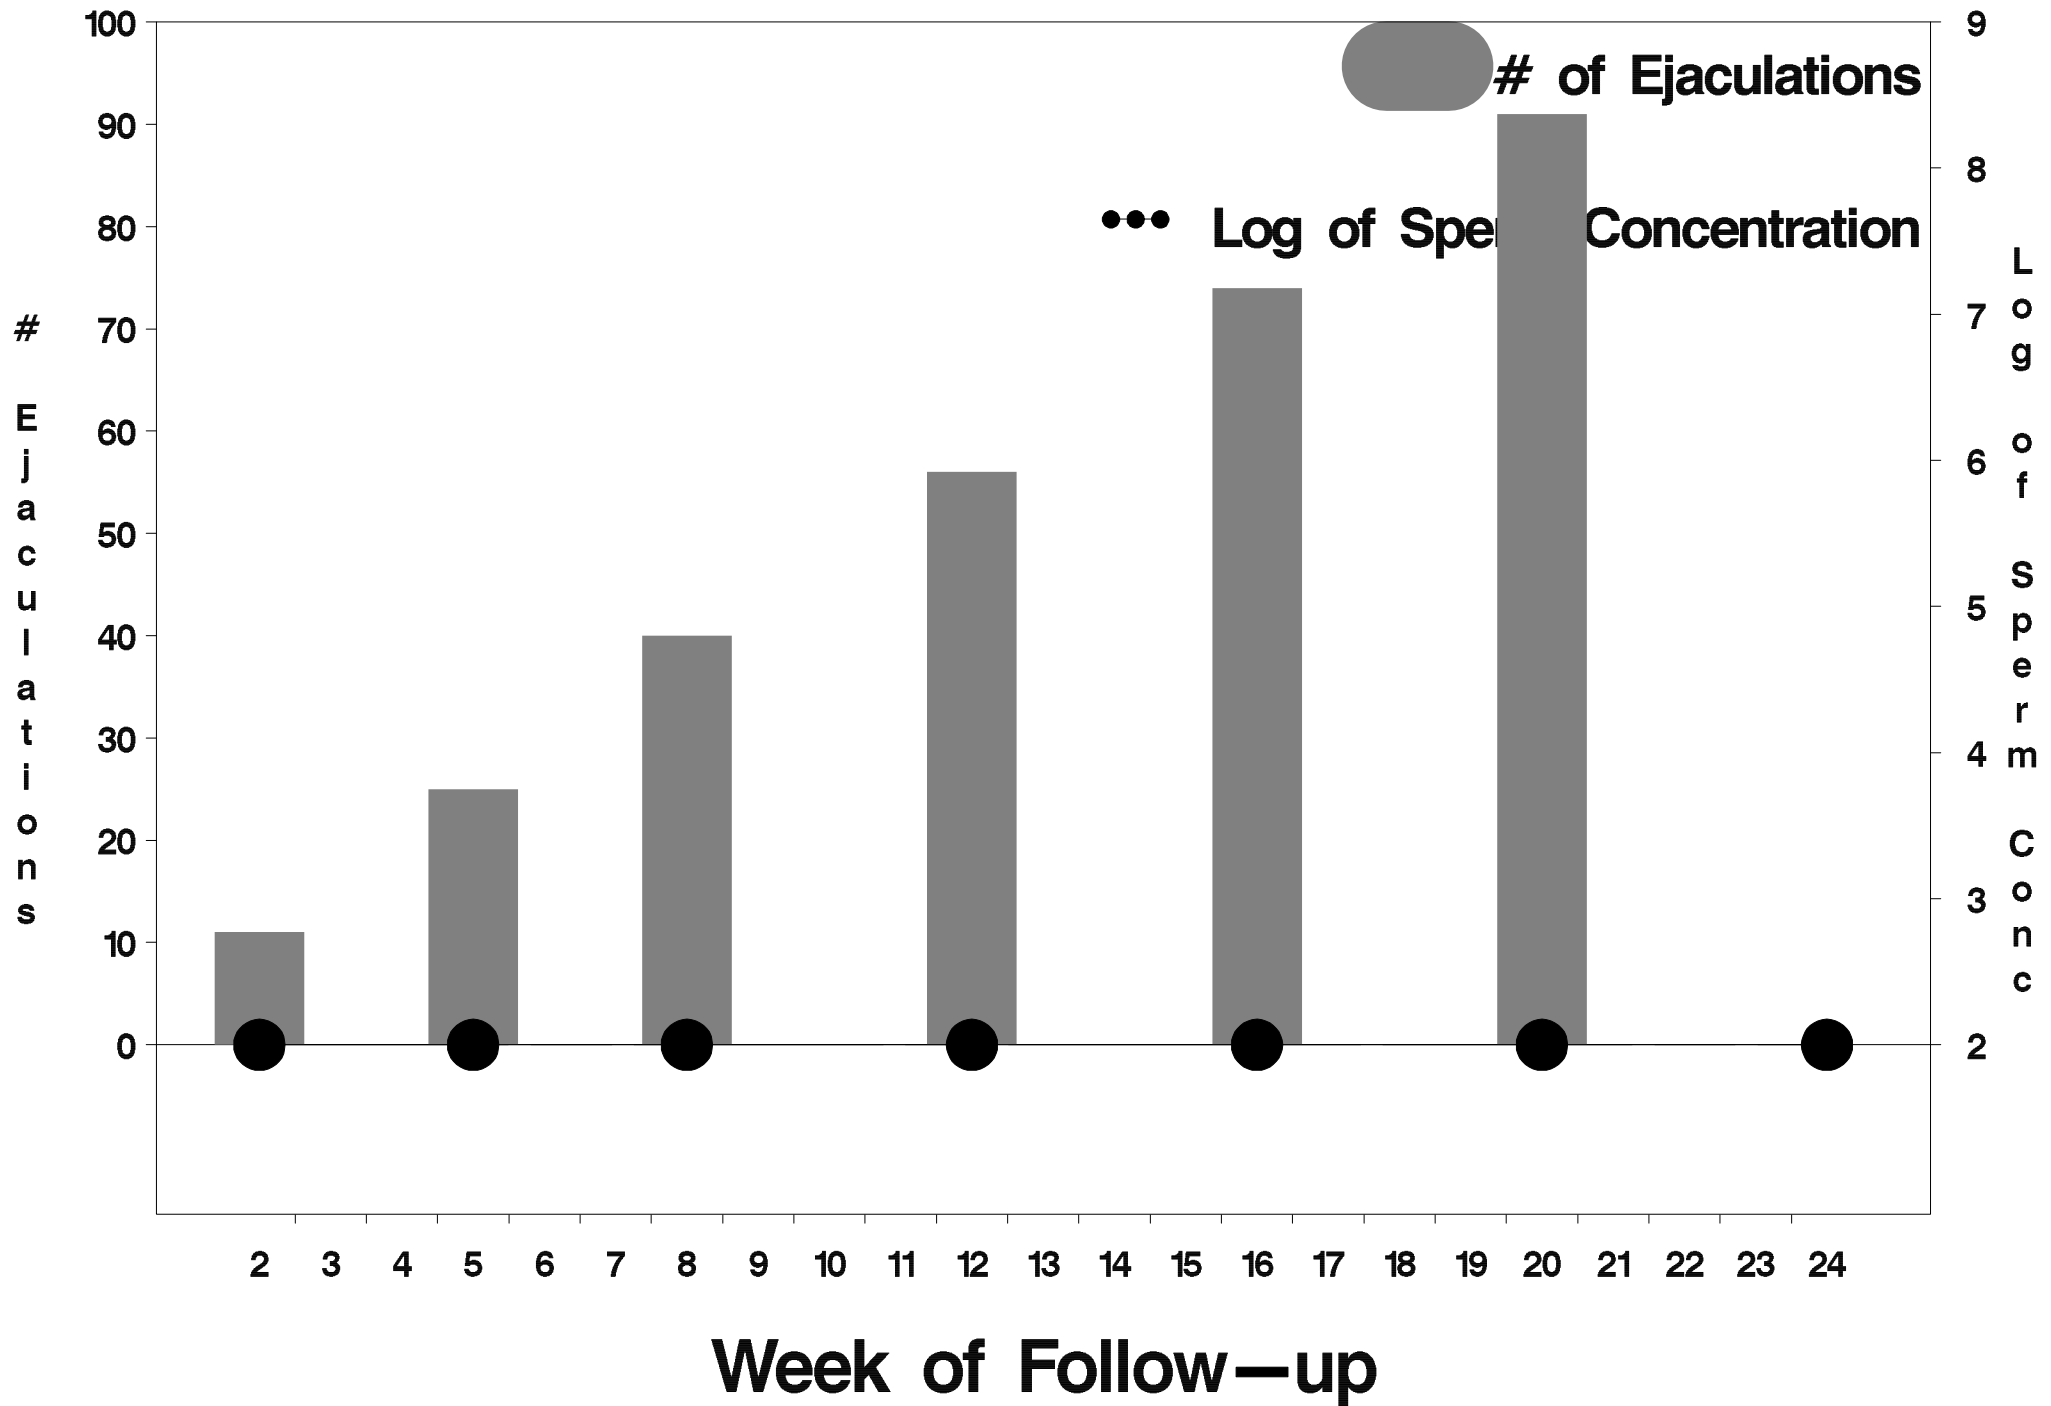

# Participant number= 764

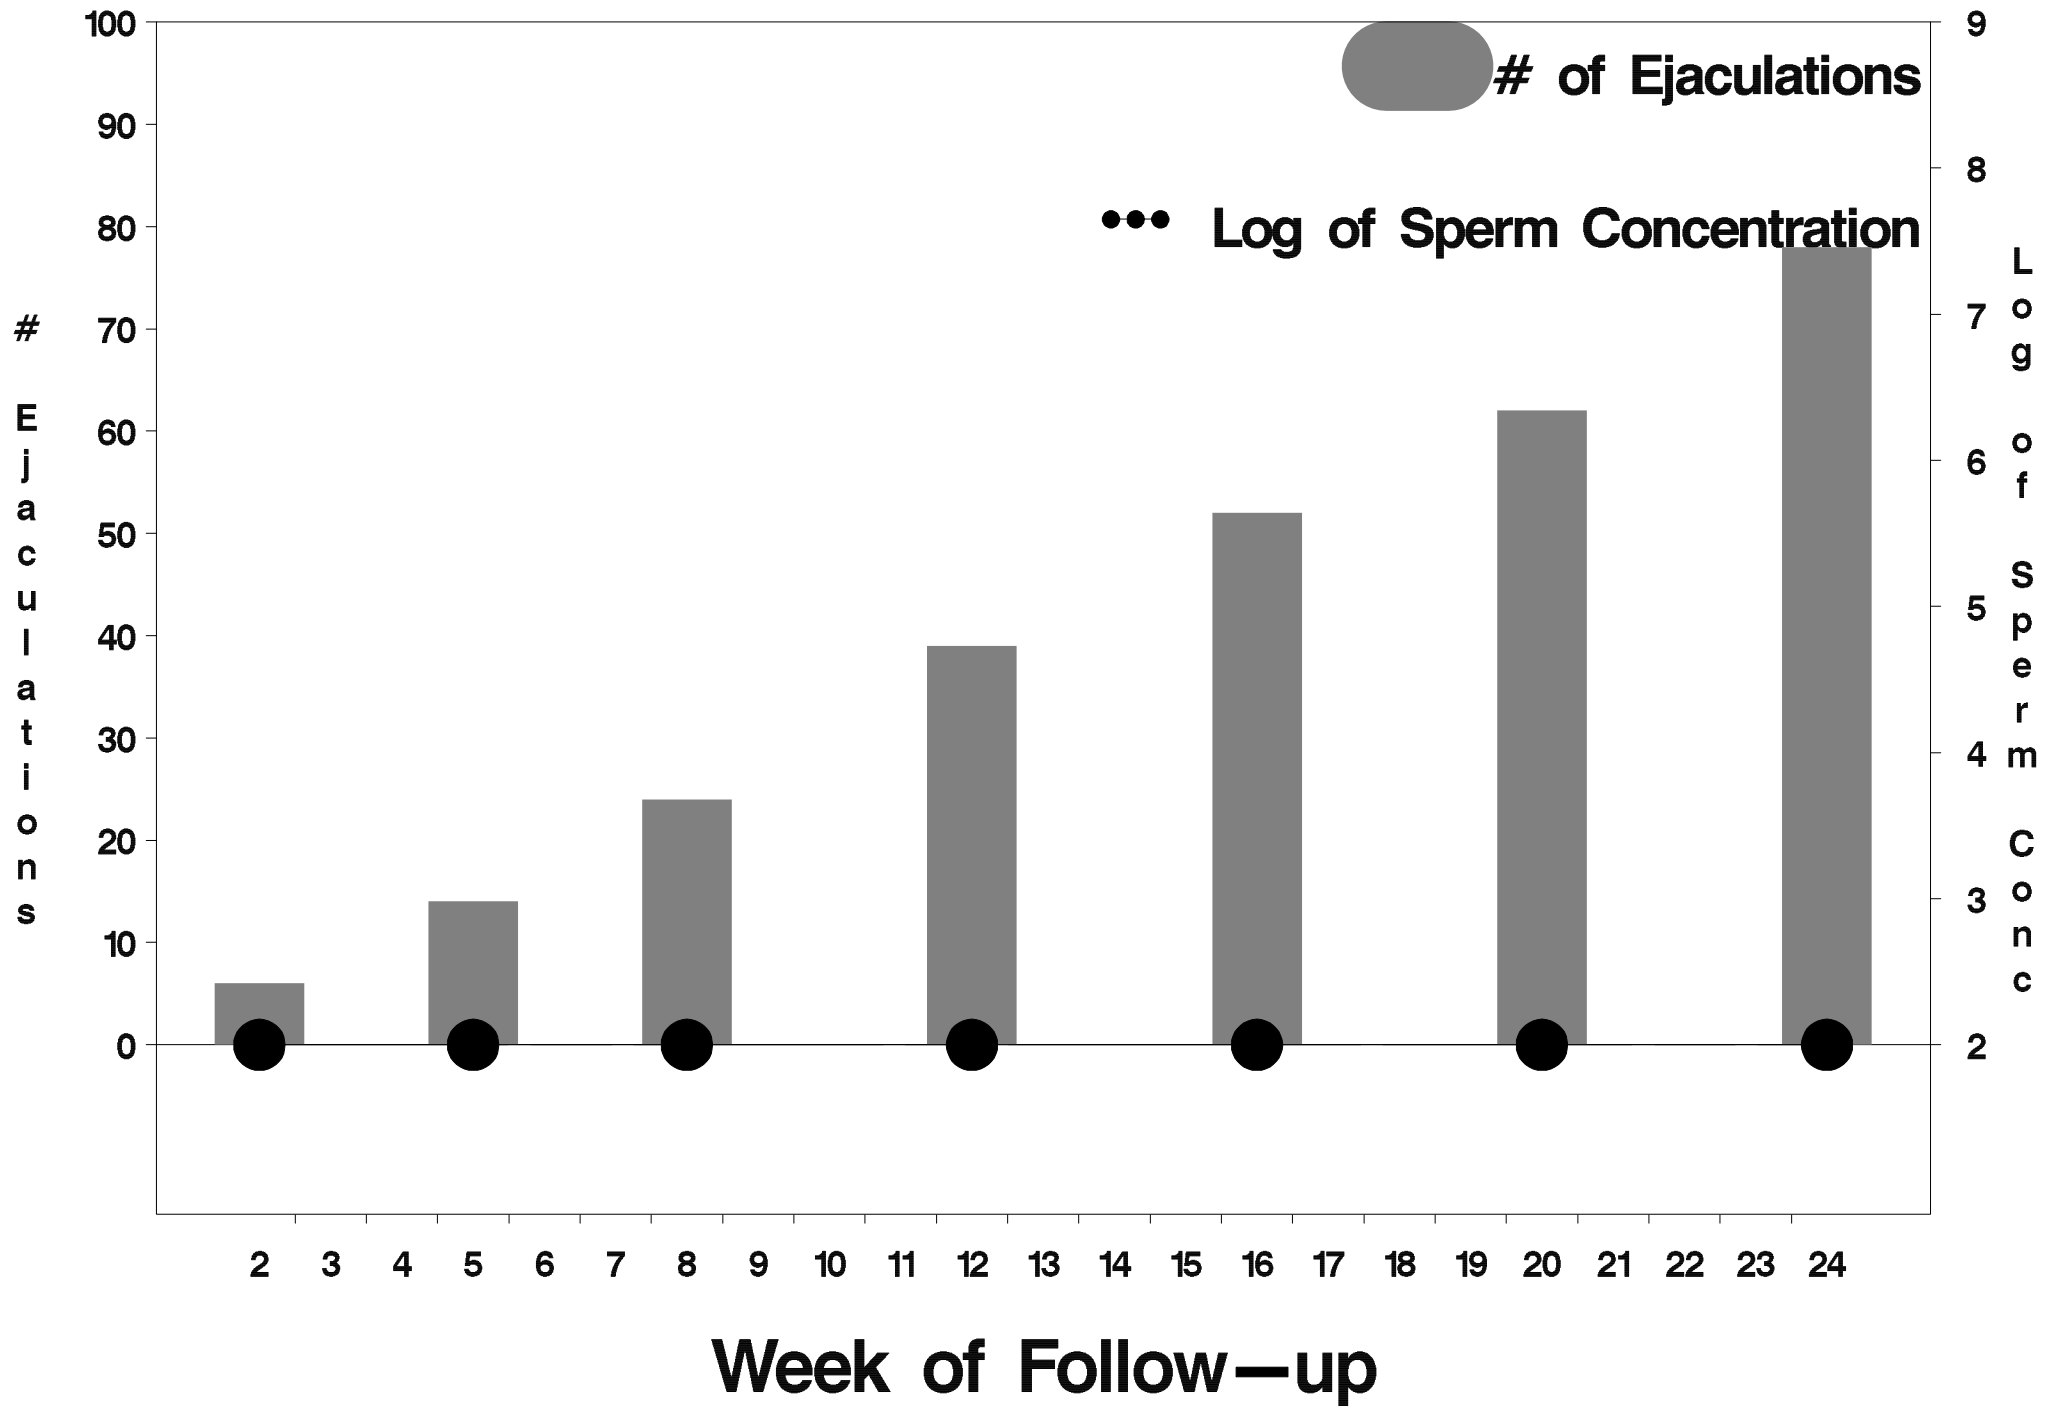

# Participant number= 765

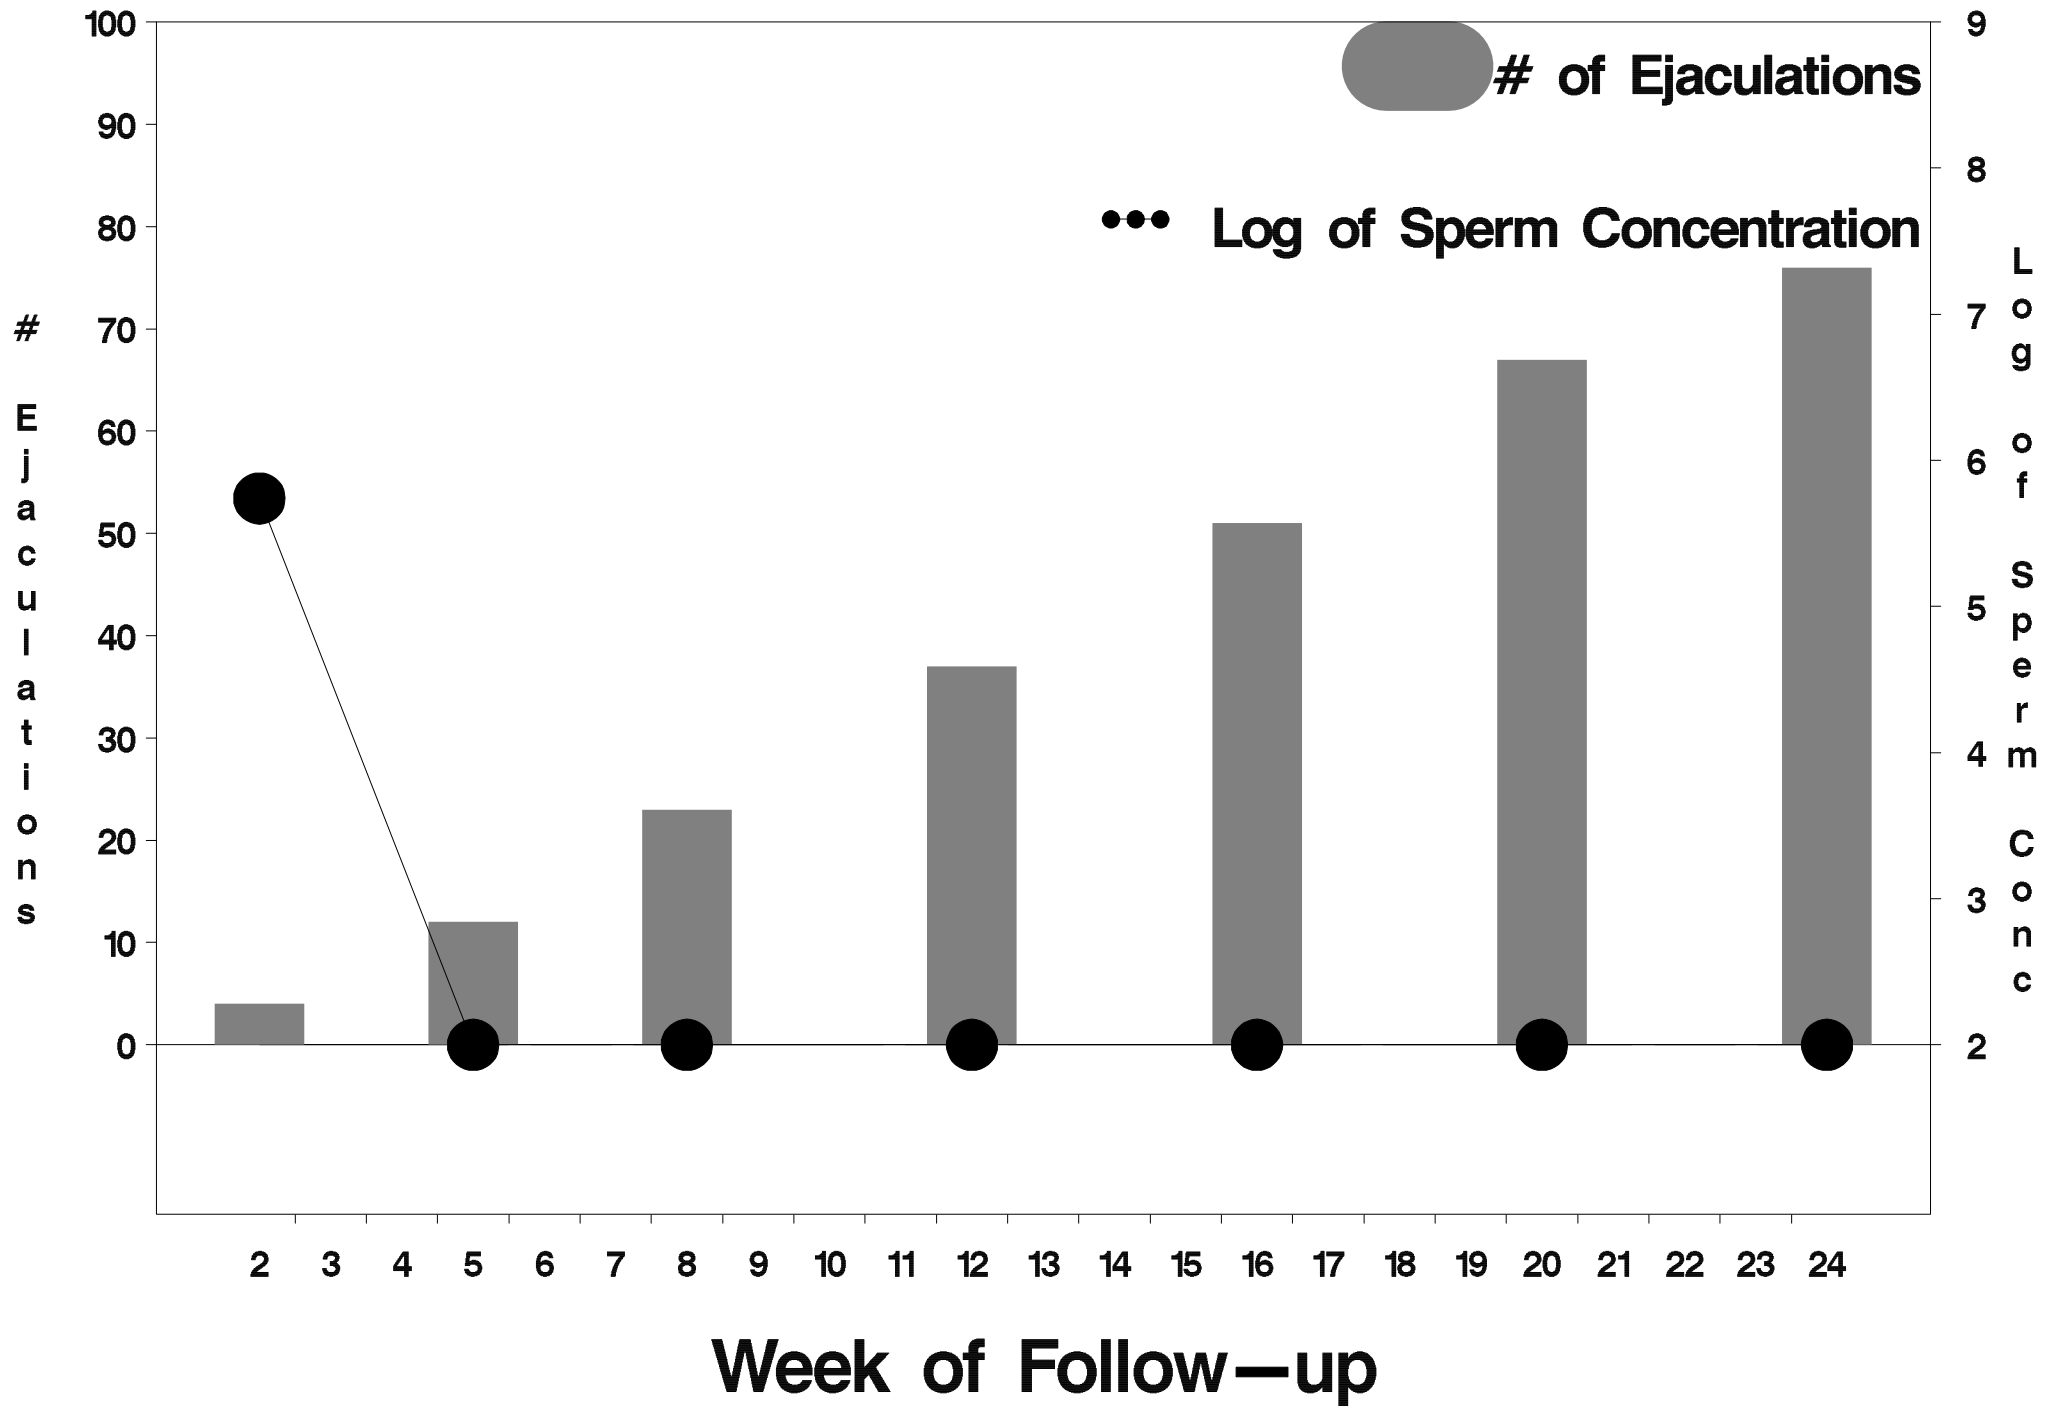

# Participant number= 766

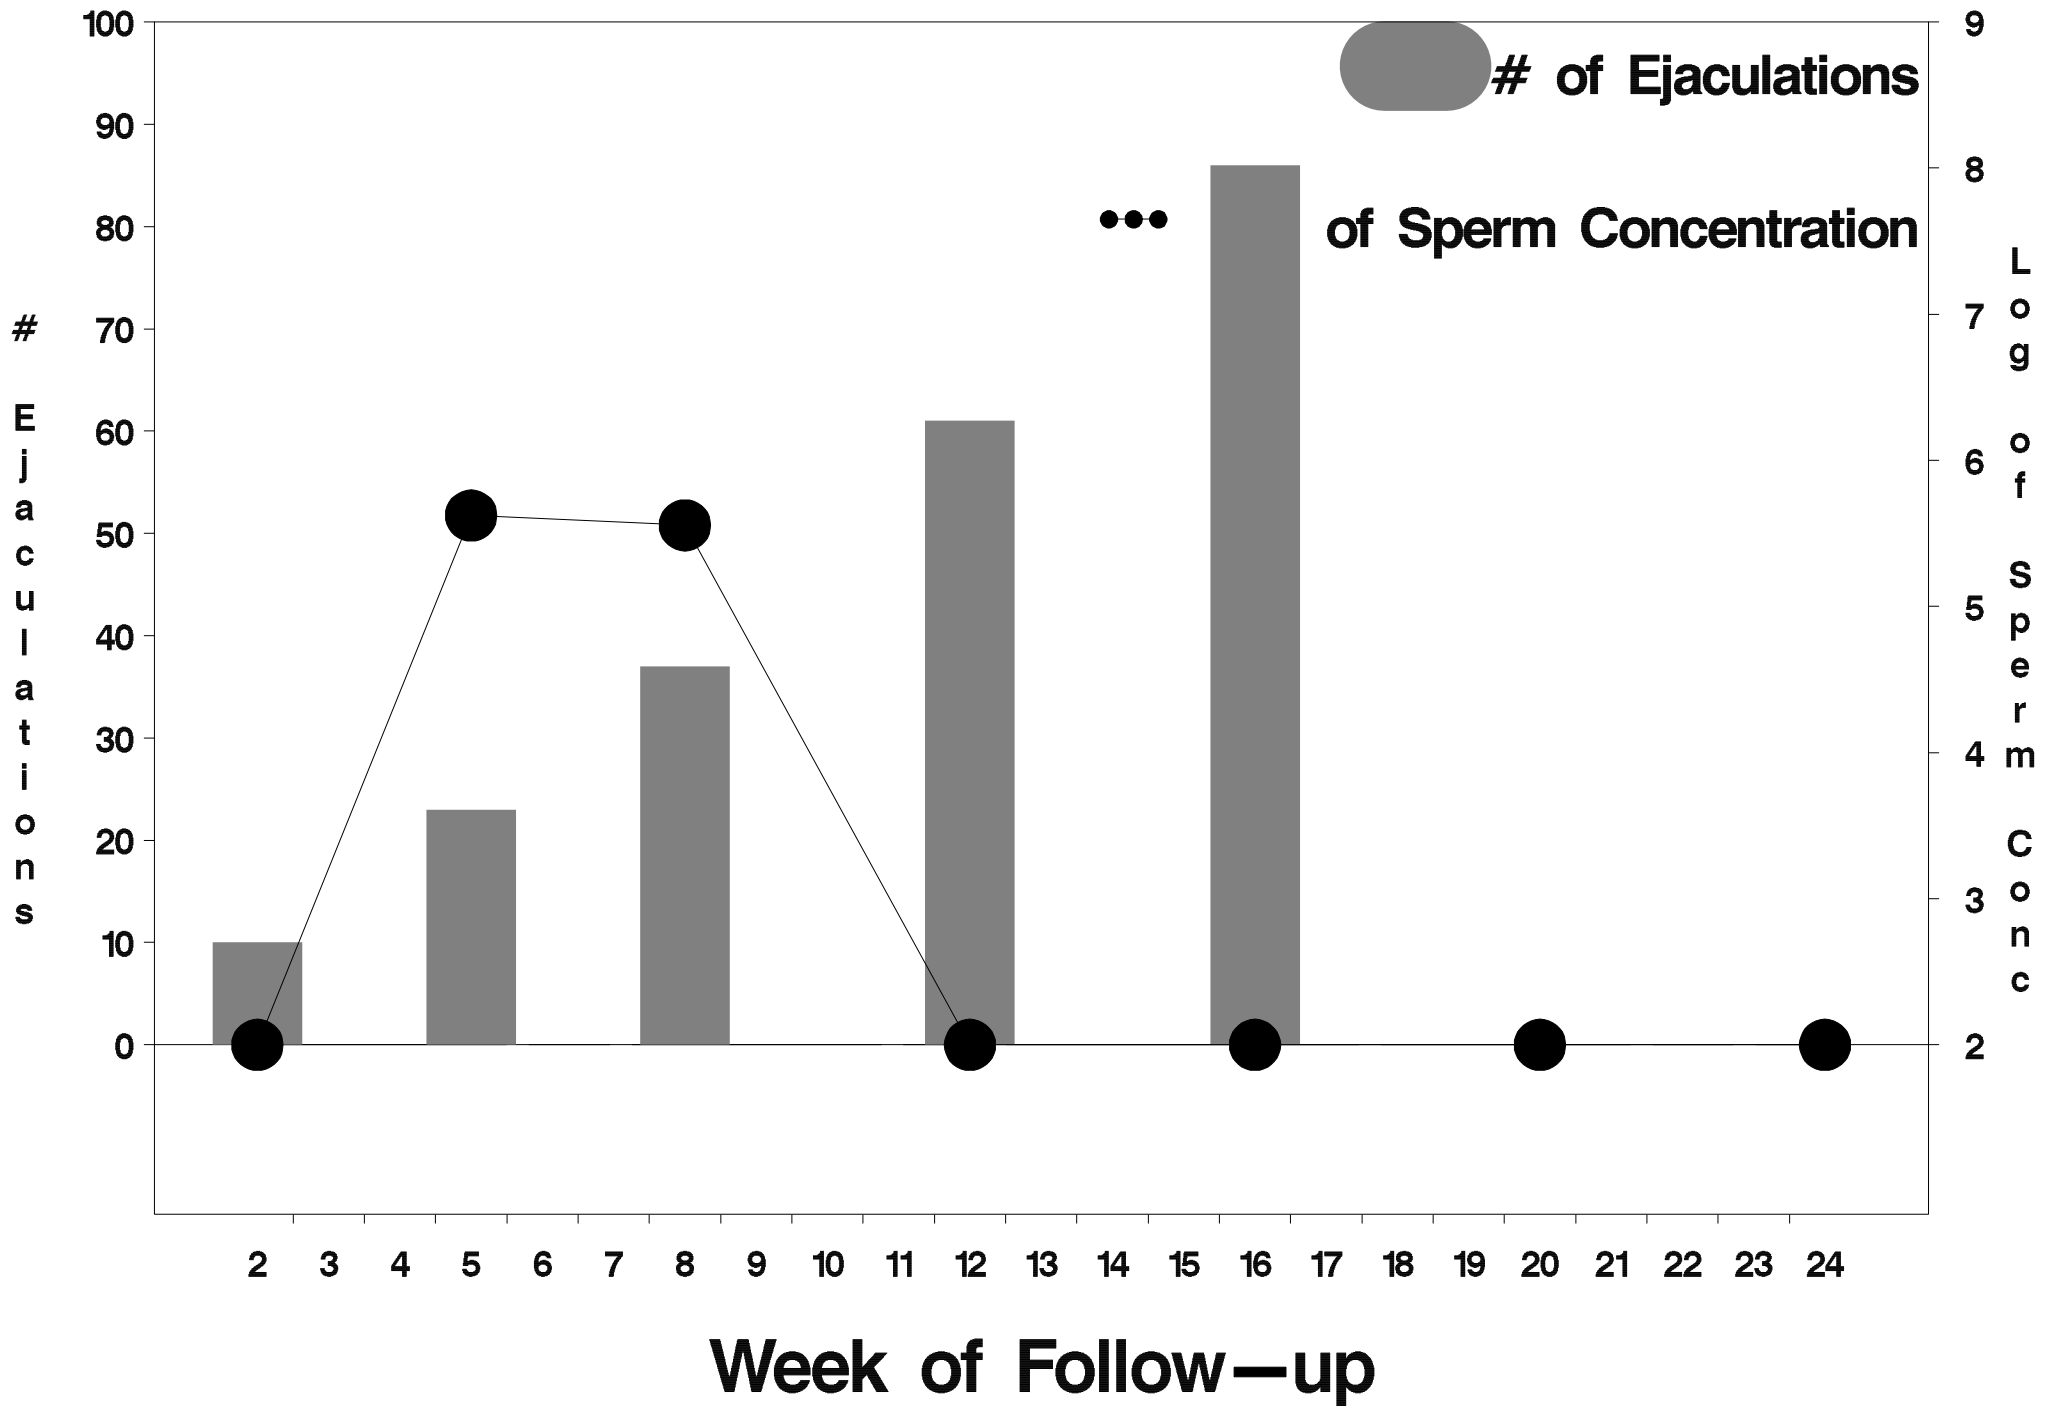

# Participant number= 767

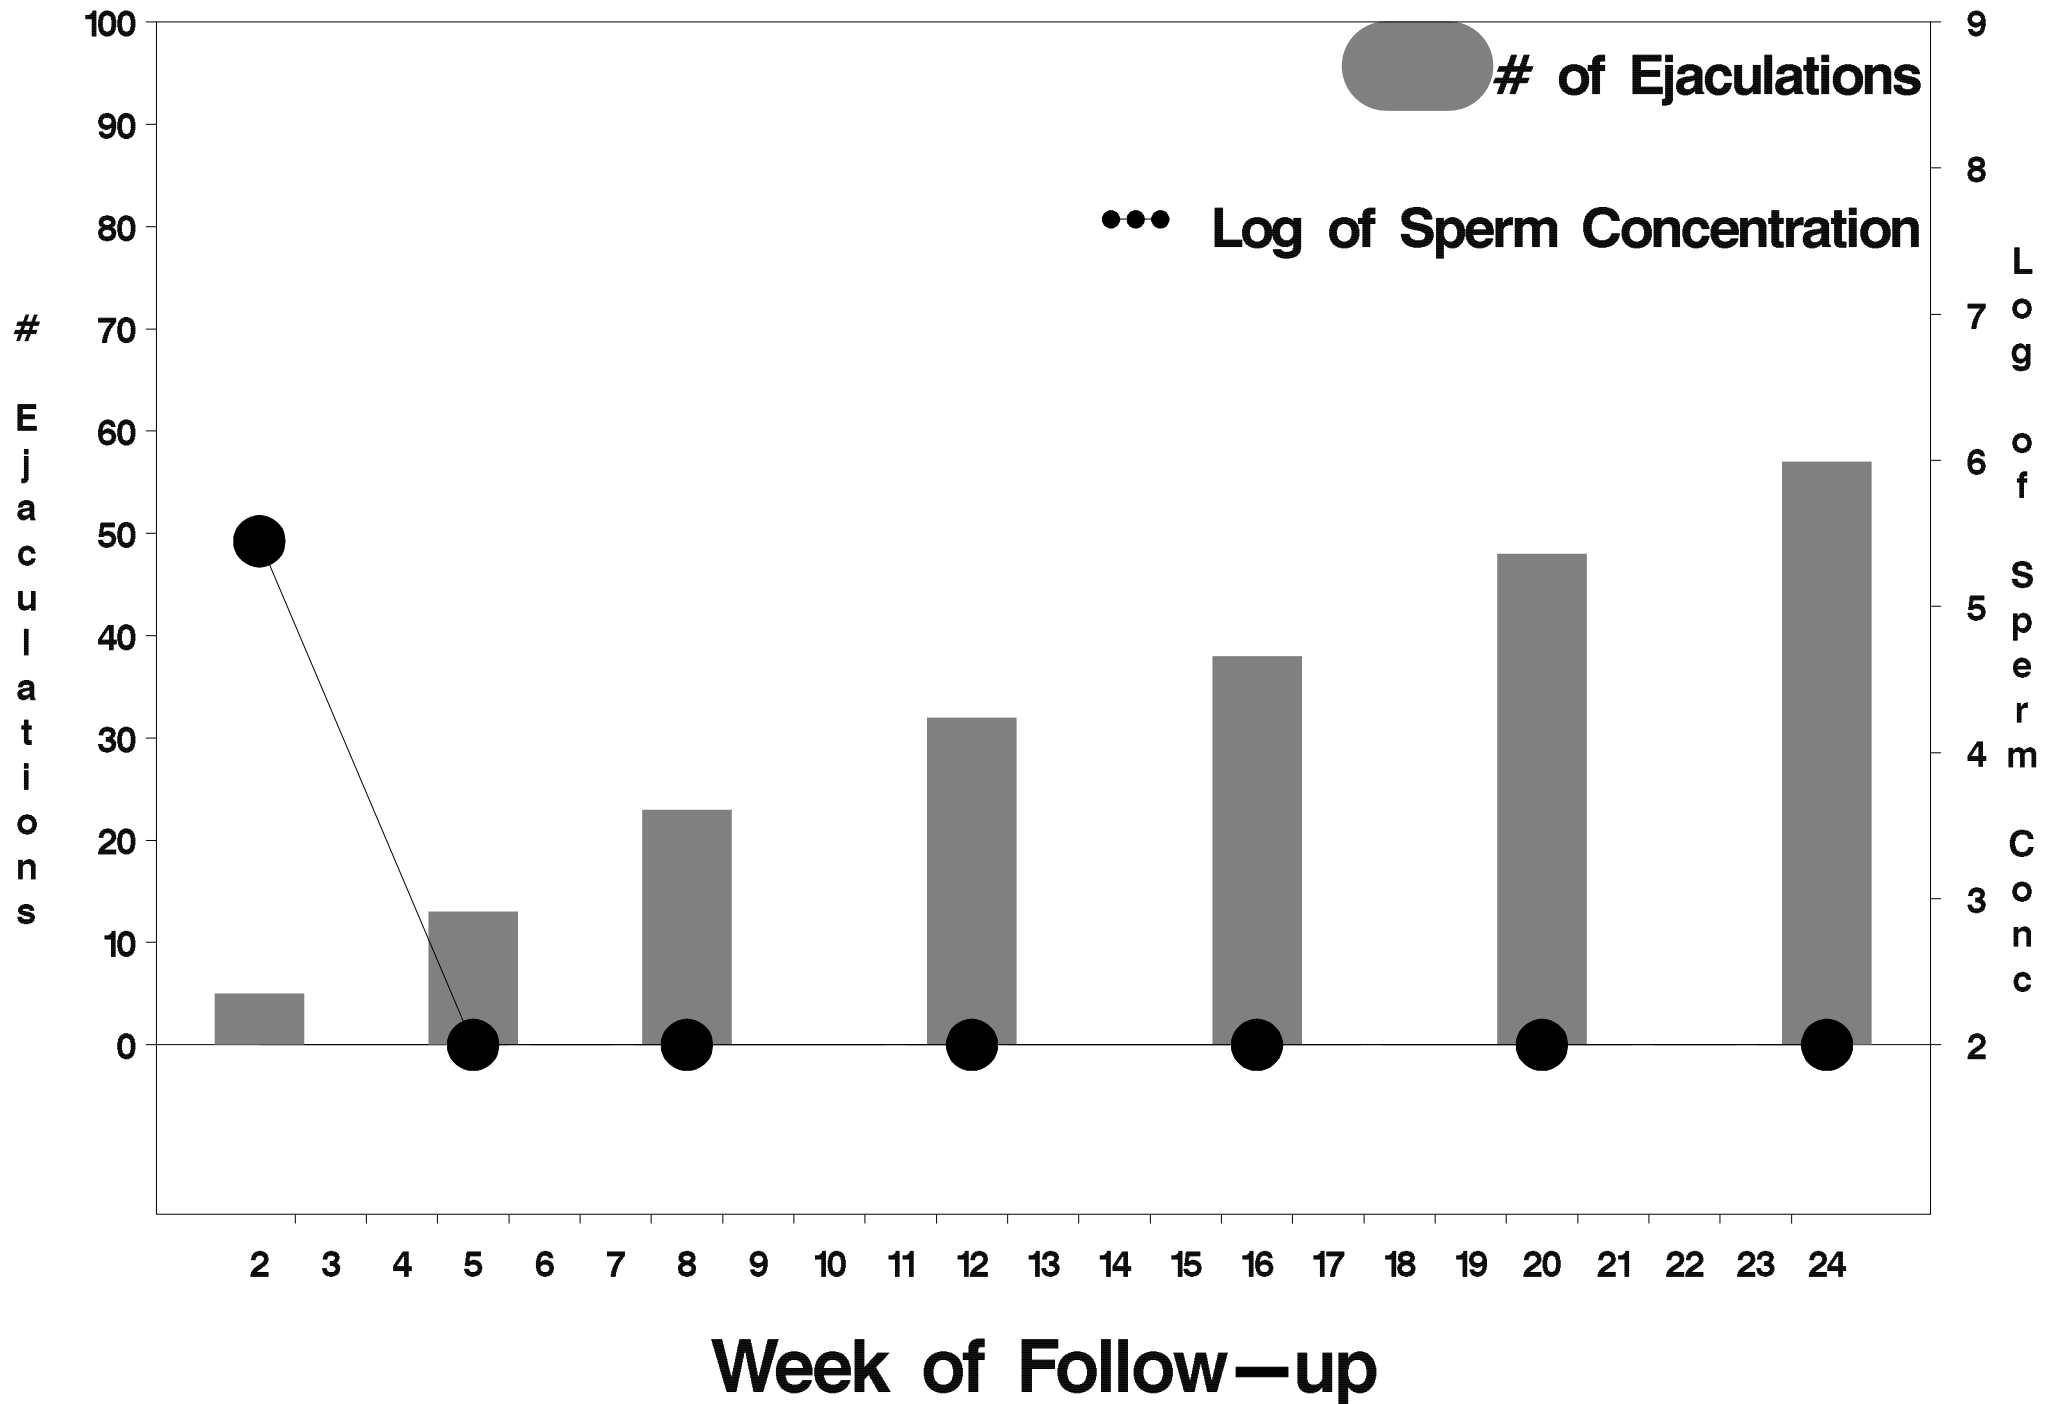

# Participant number= 768

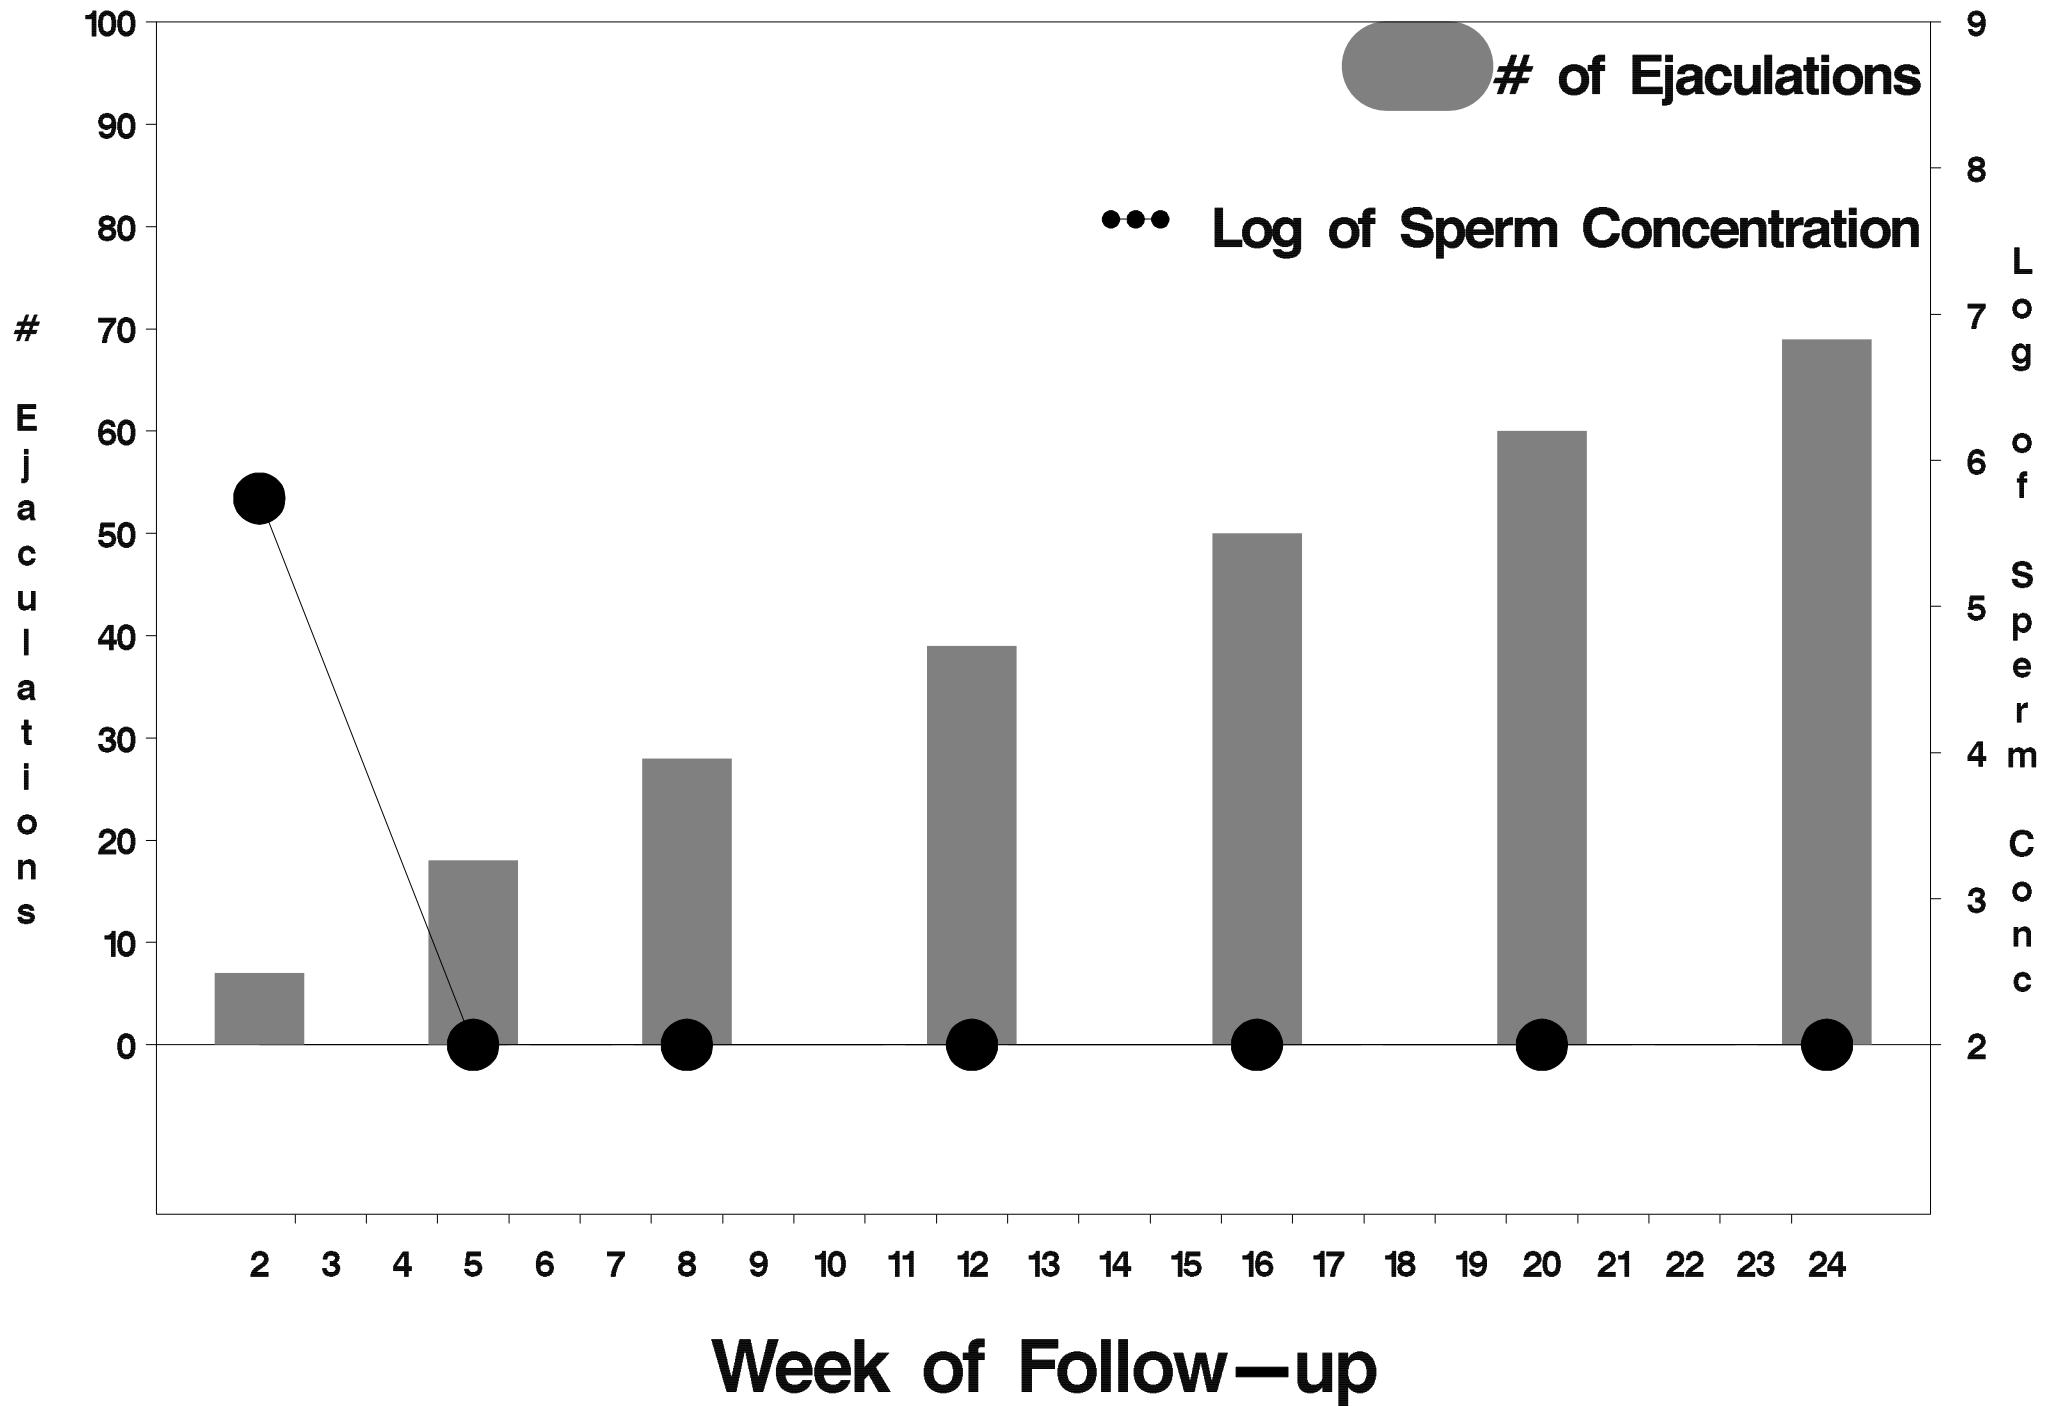

# Participant number= 769

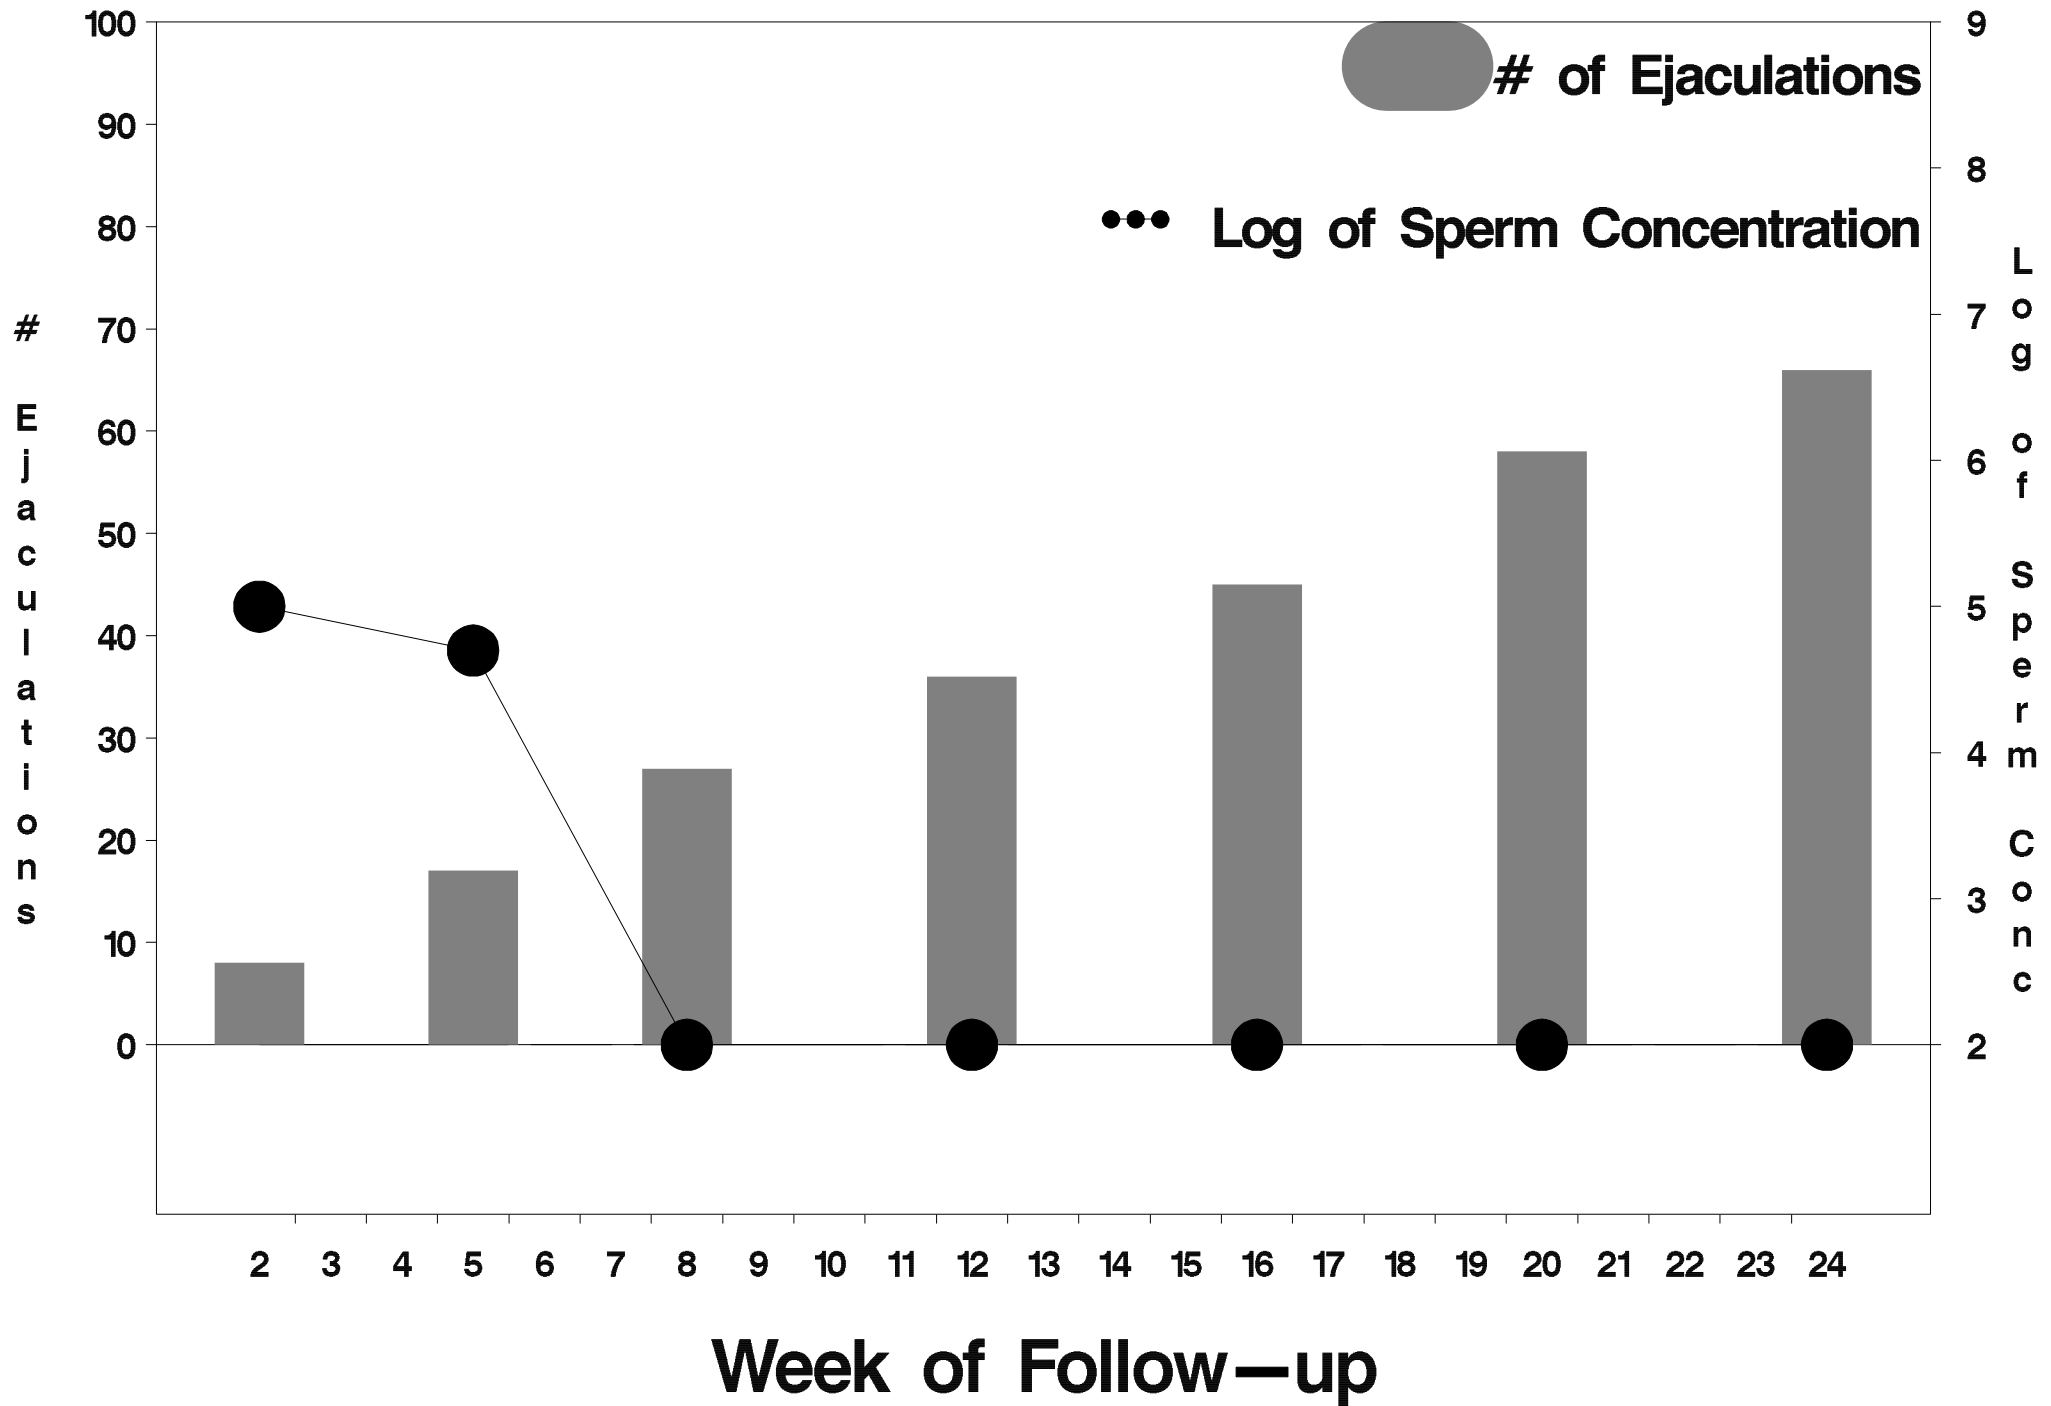

# Participant number= 770

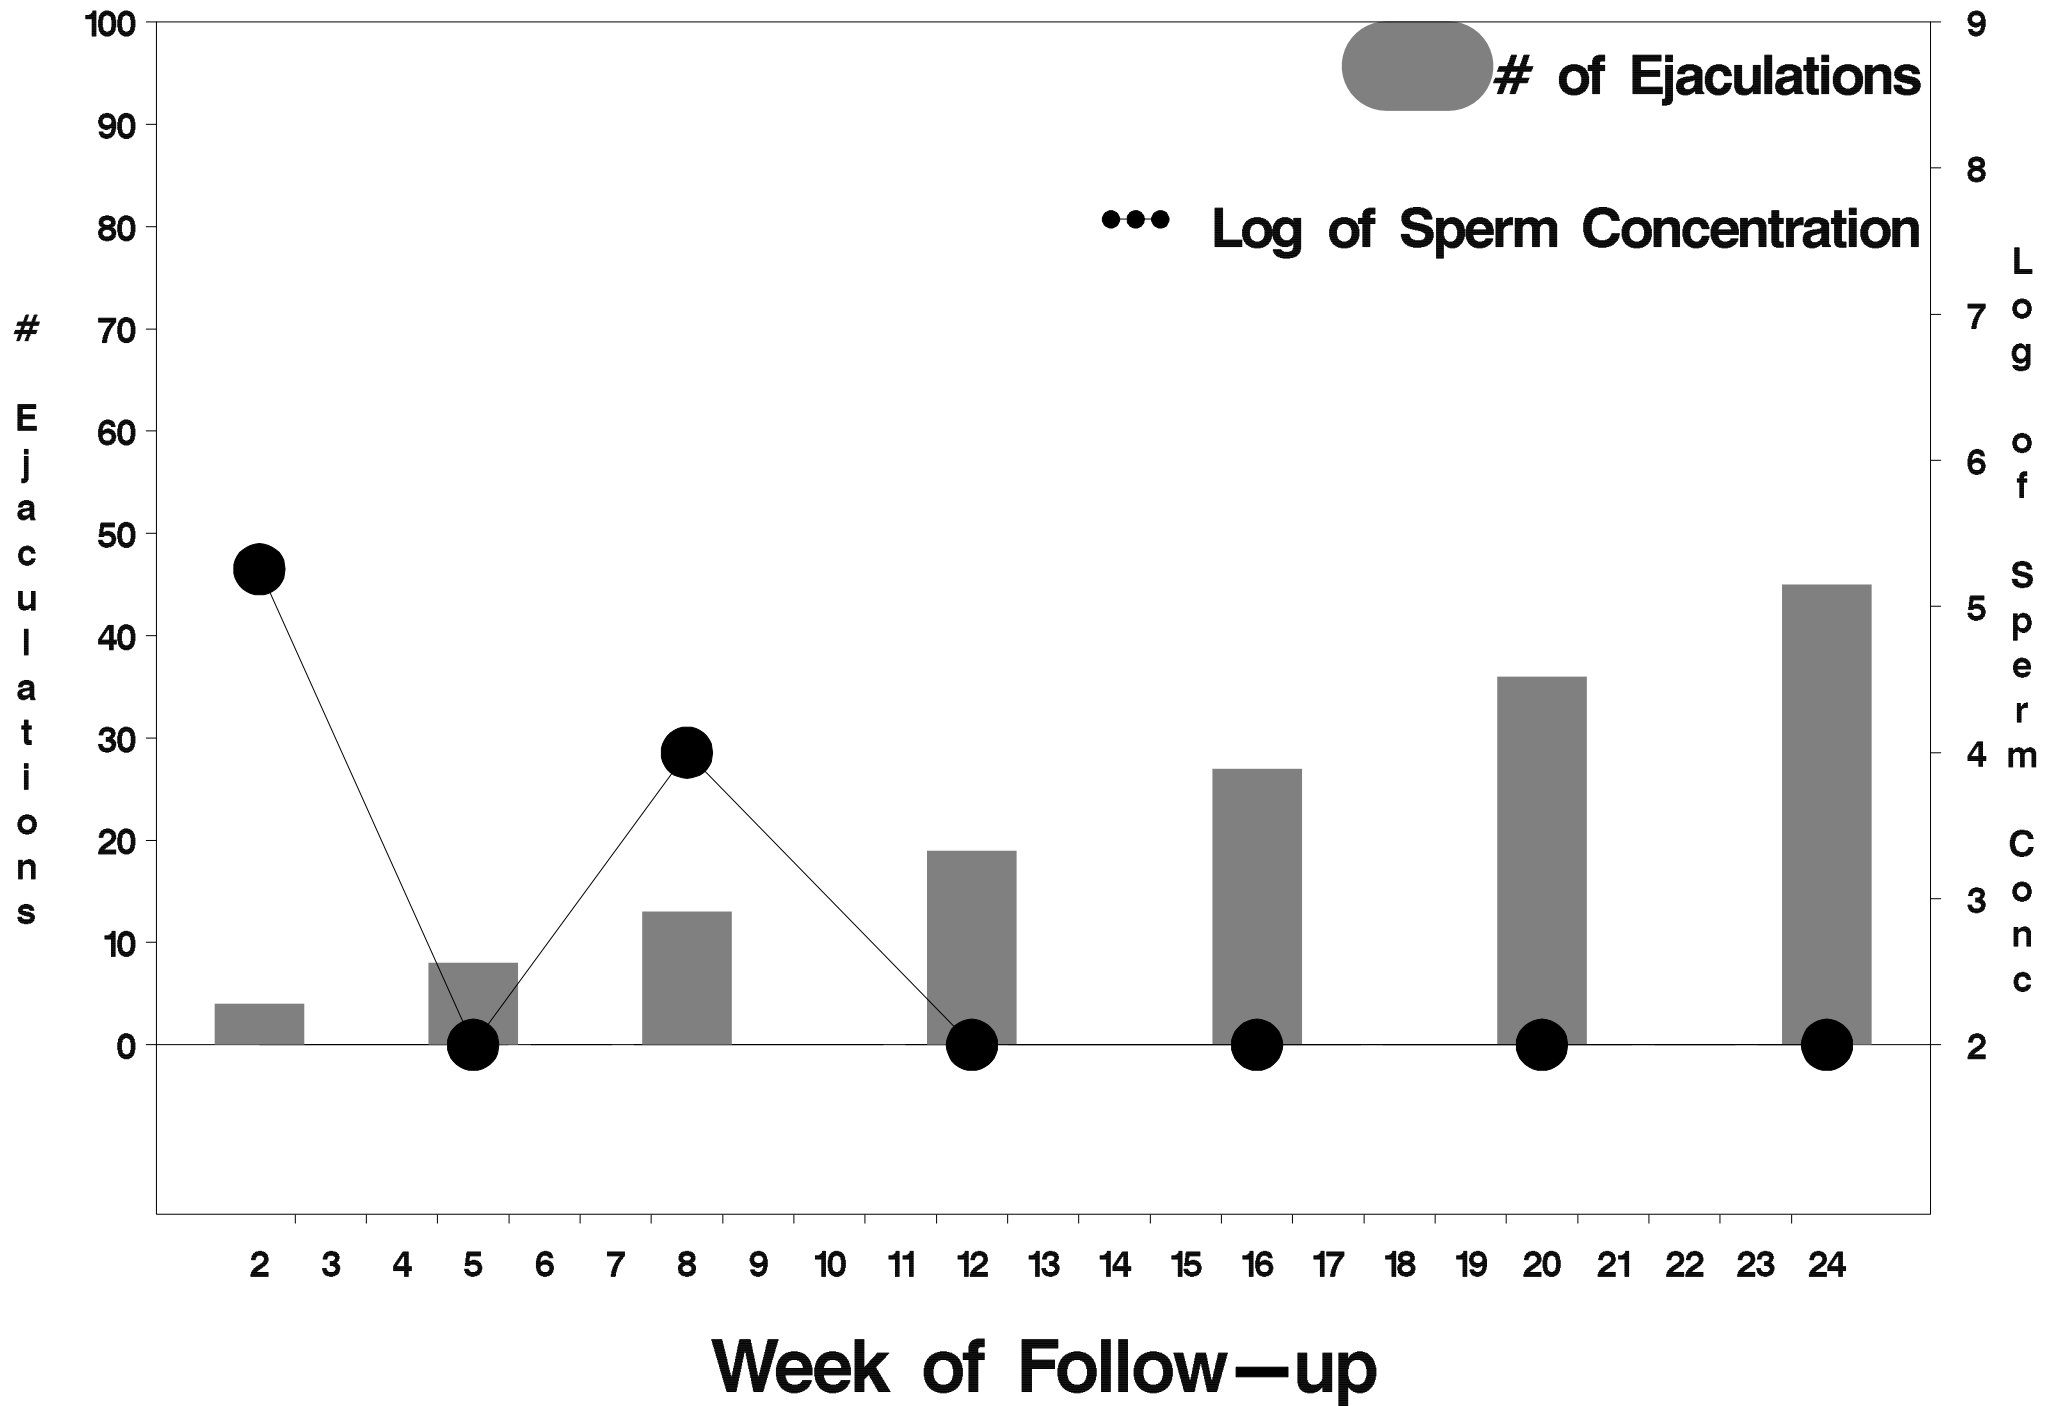



# Participant number= 771

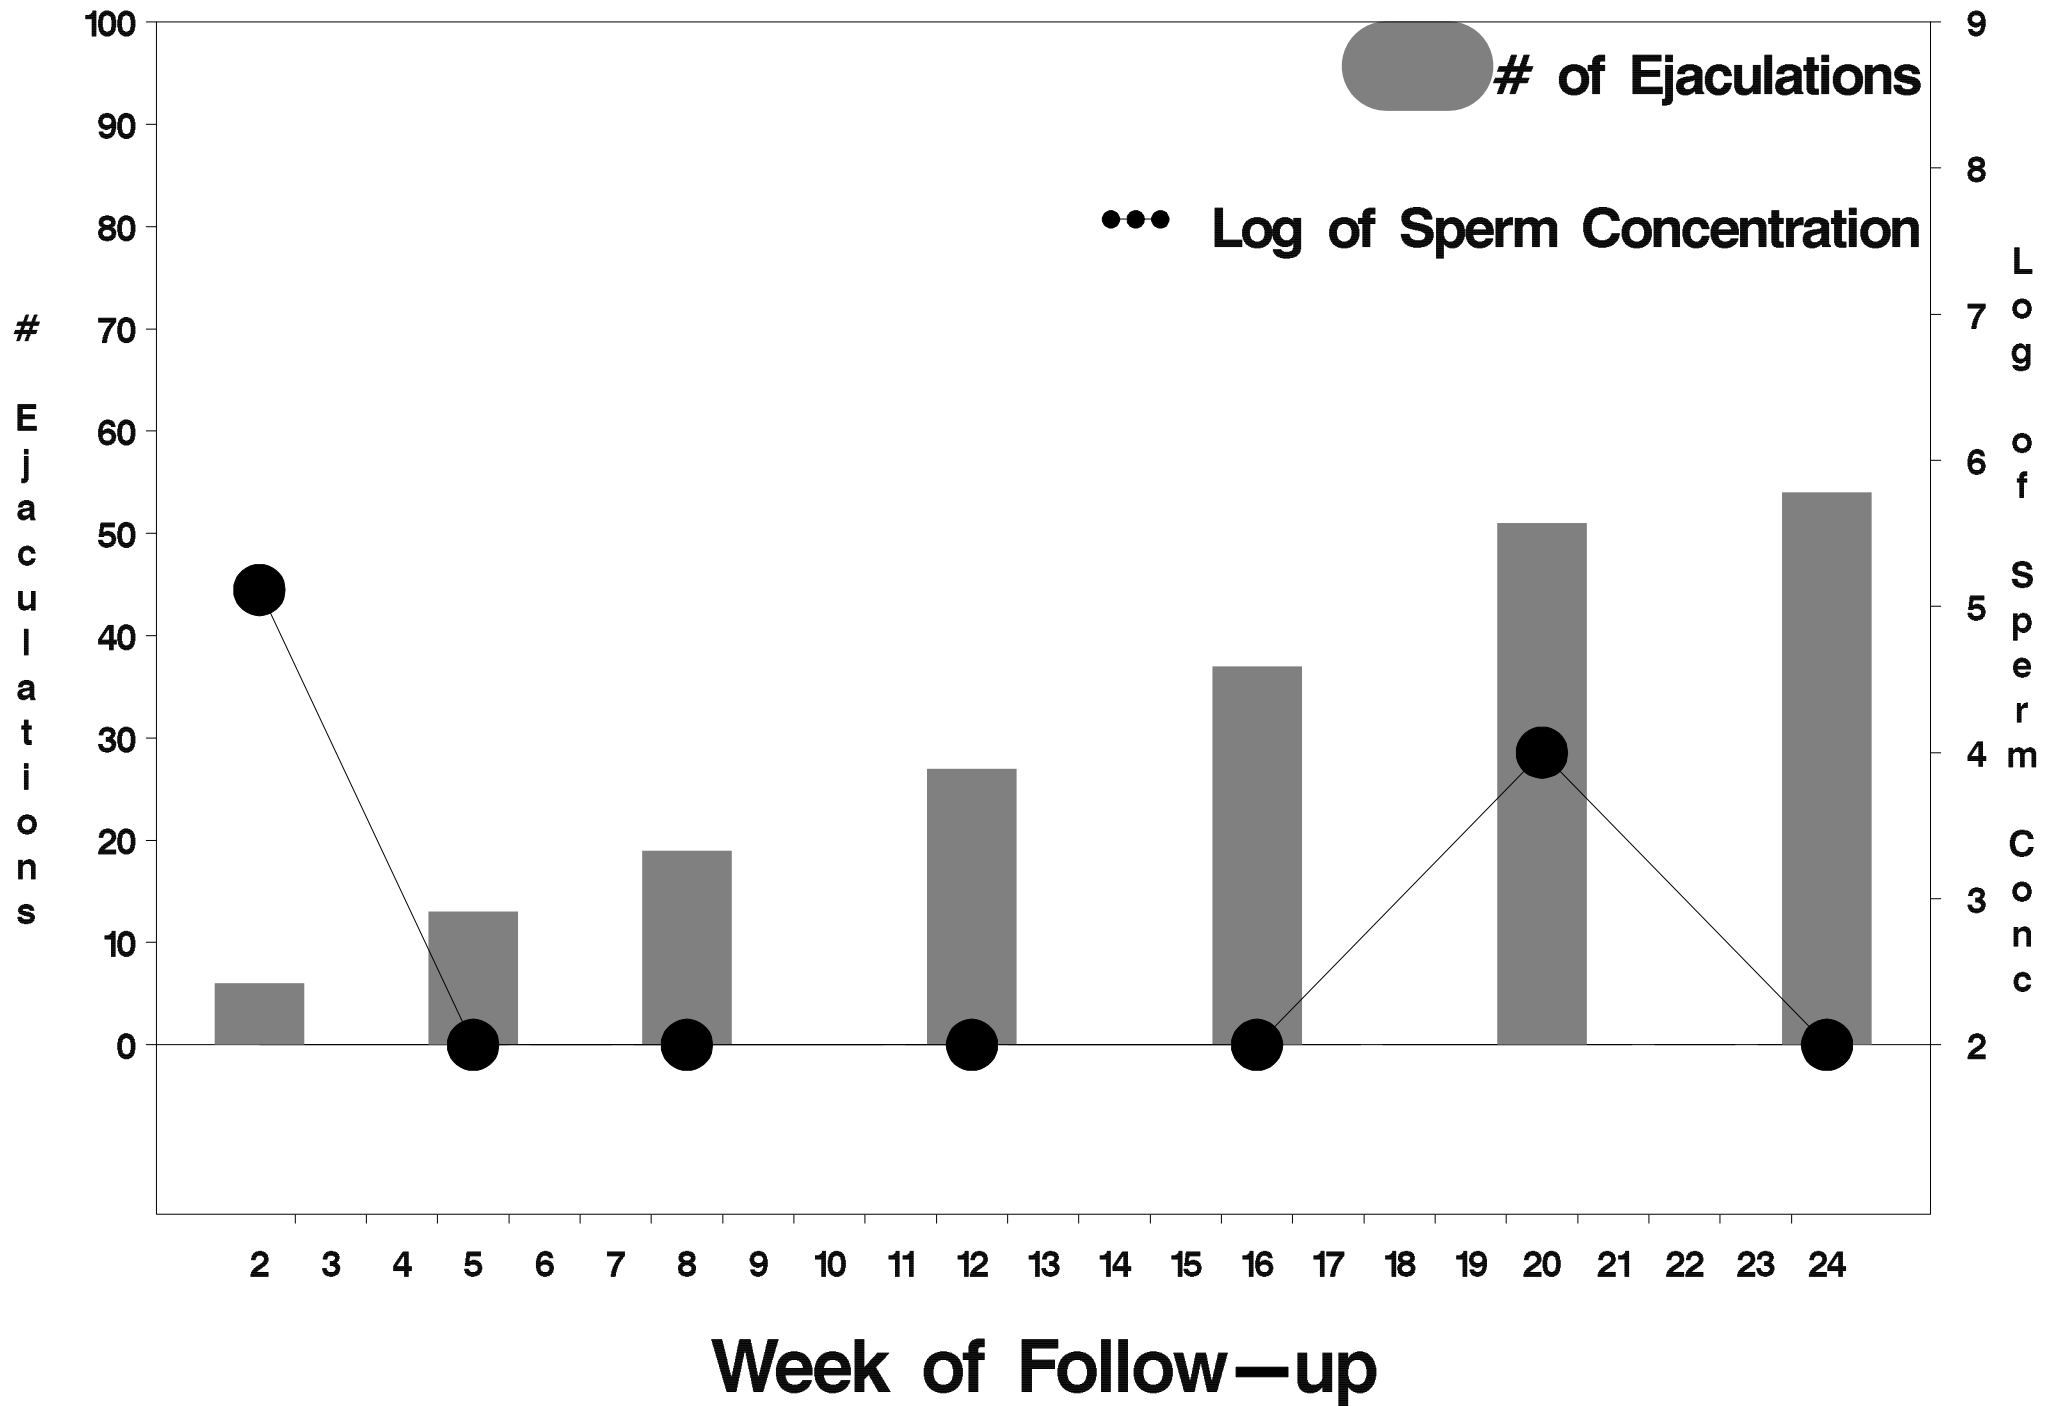

# Participant number= 772

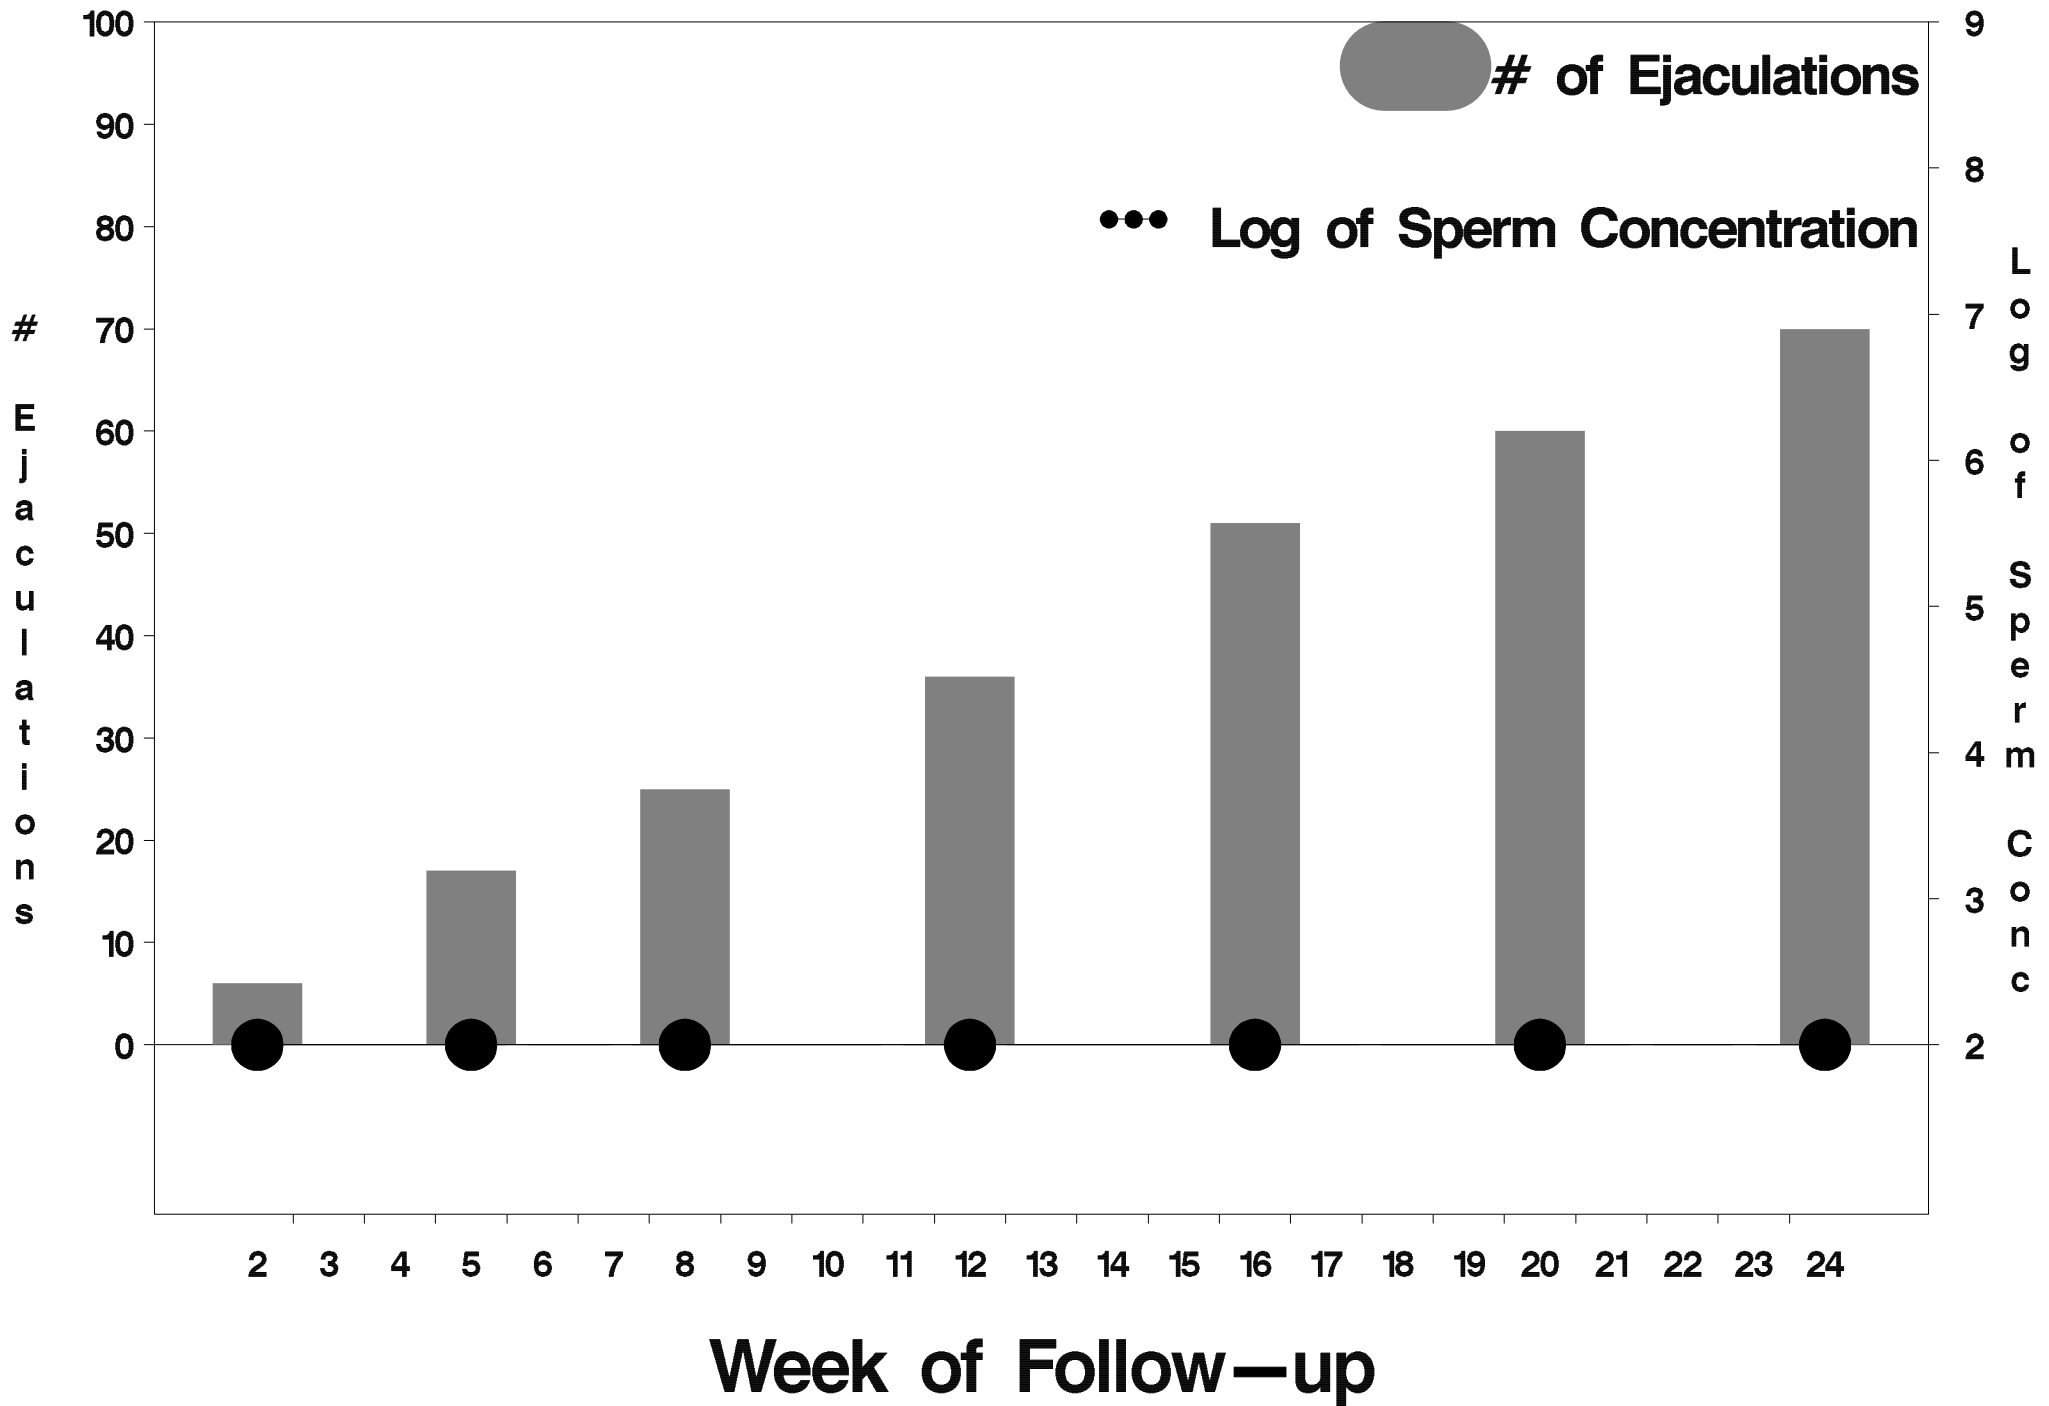

# Participant number= 773

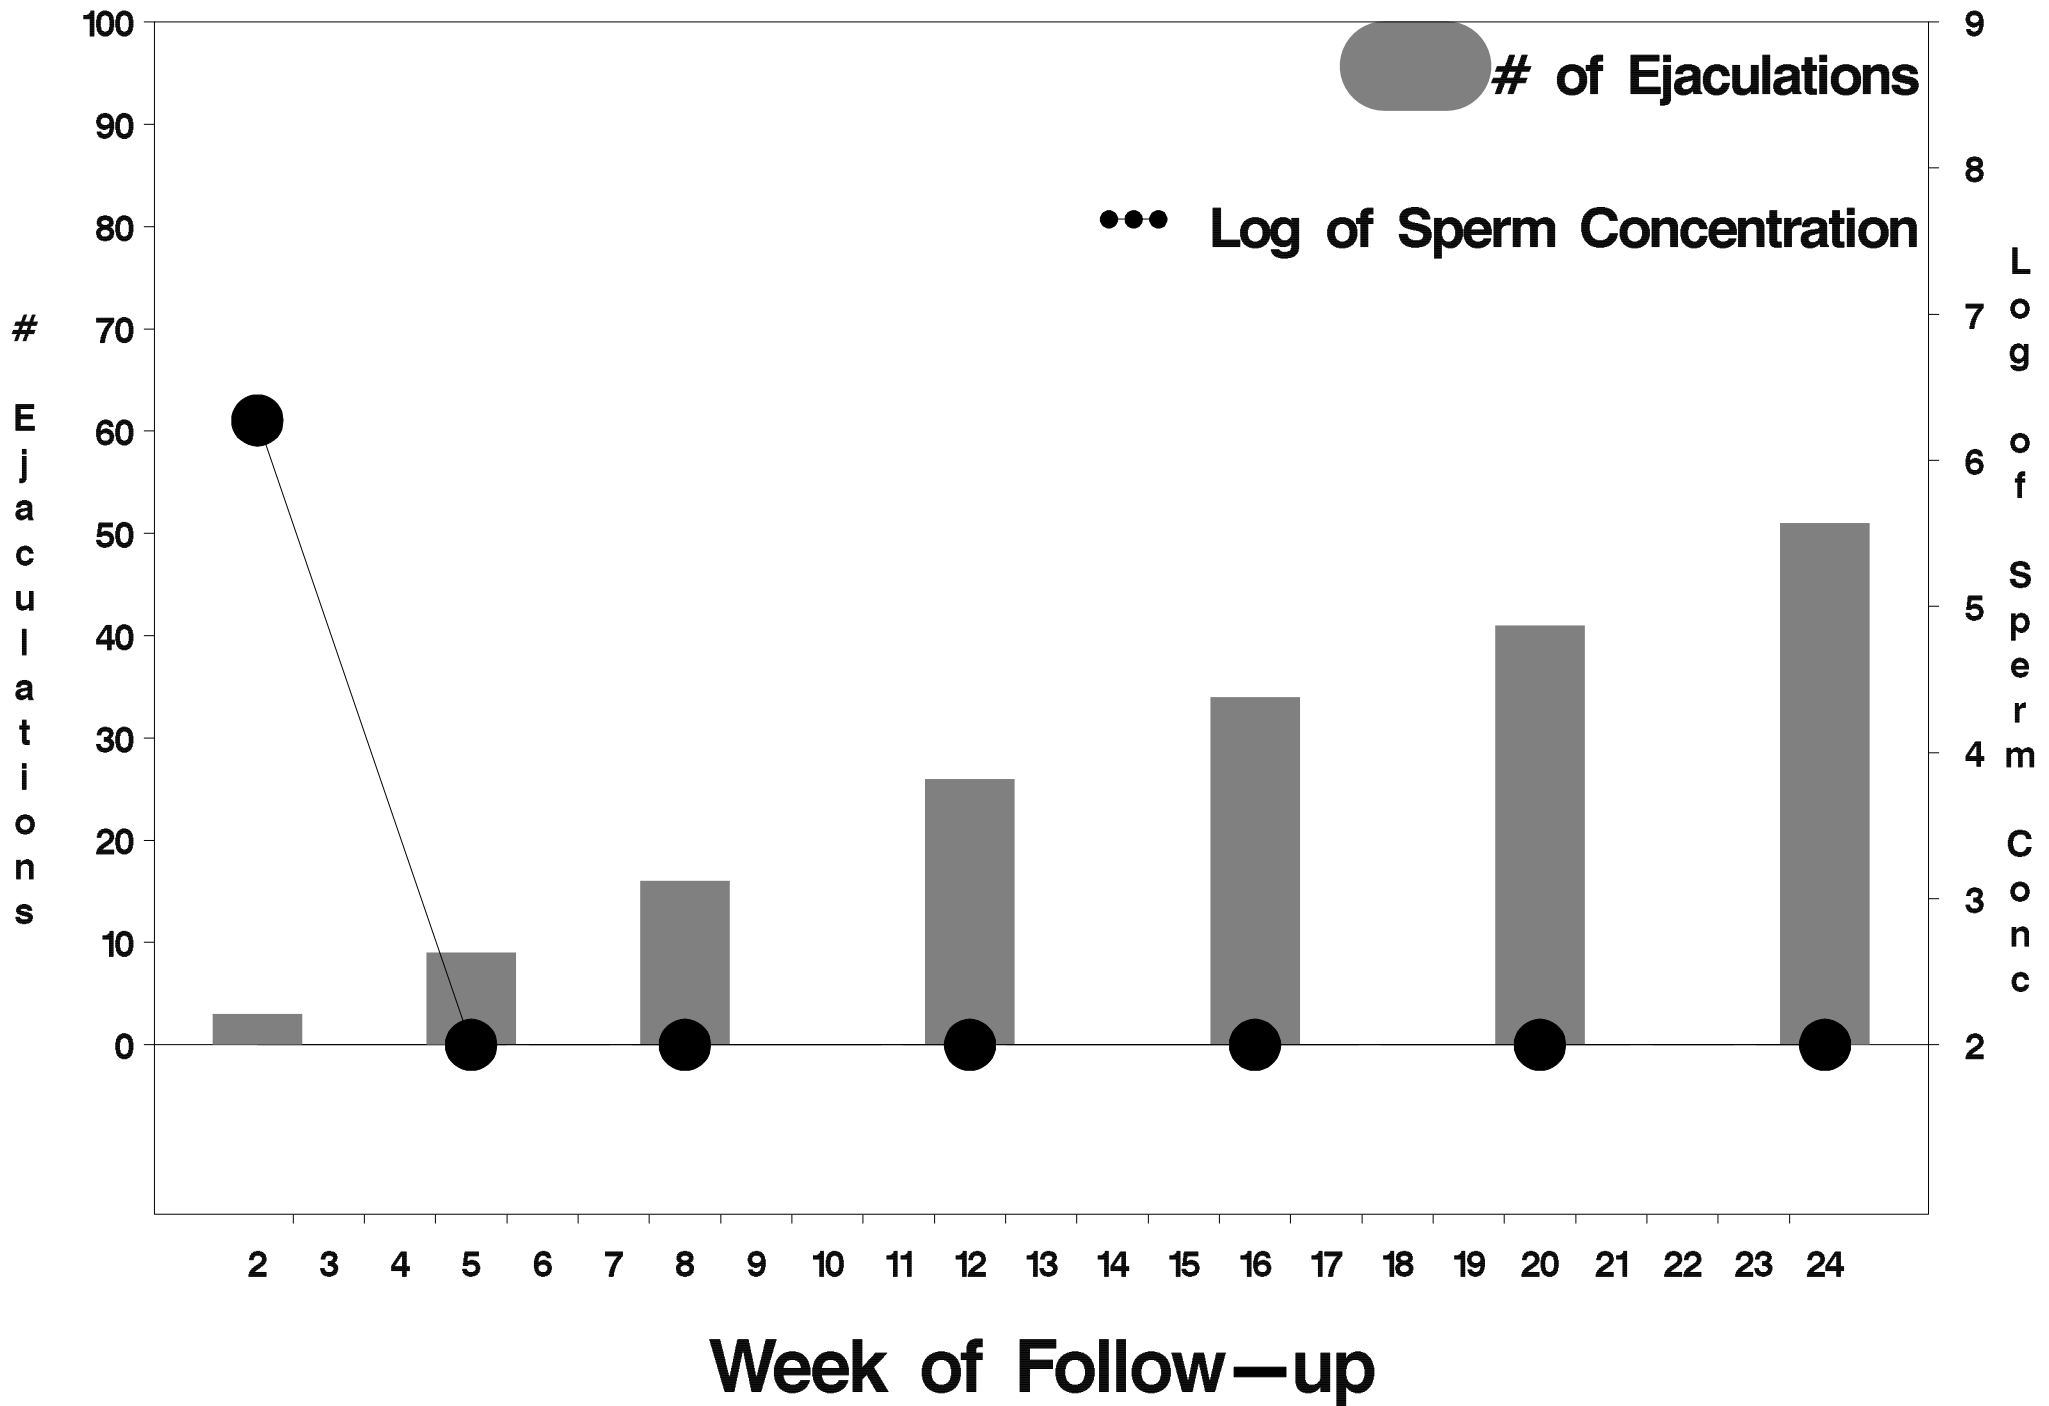

# Participant number= 774

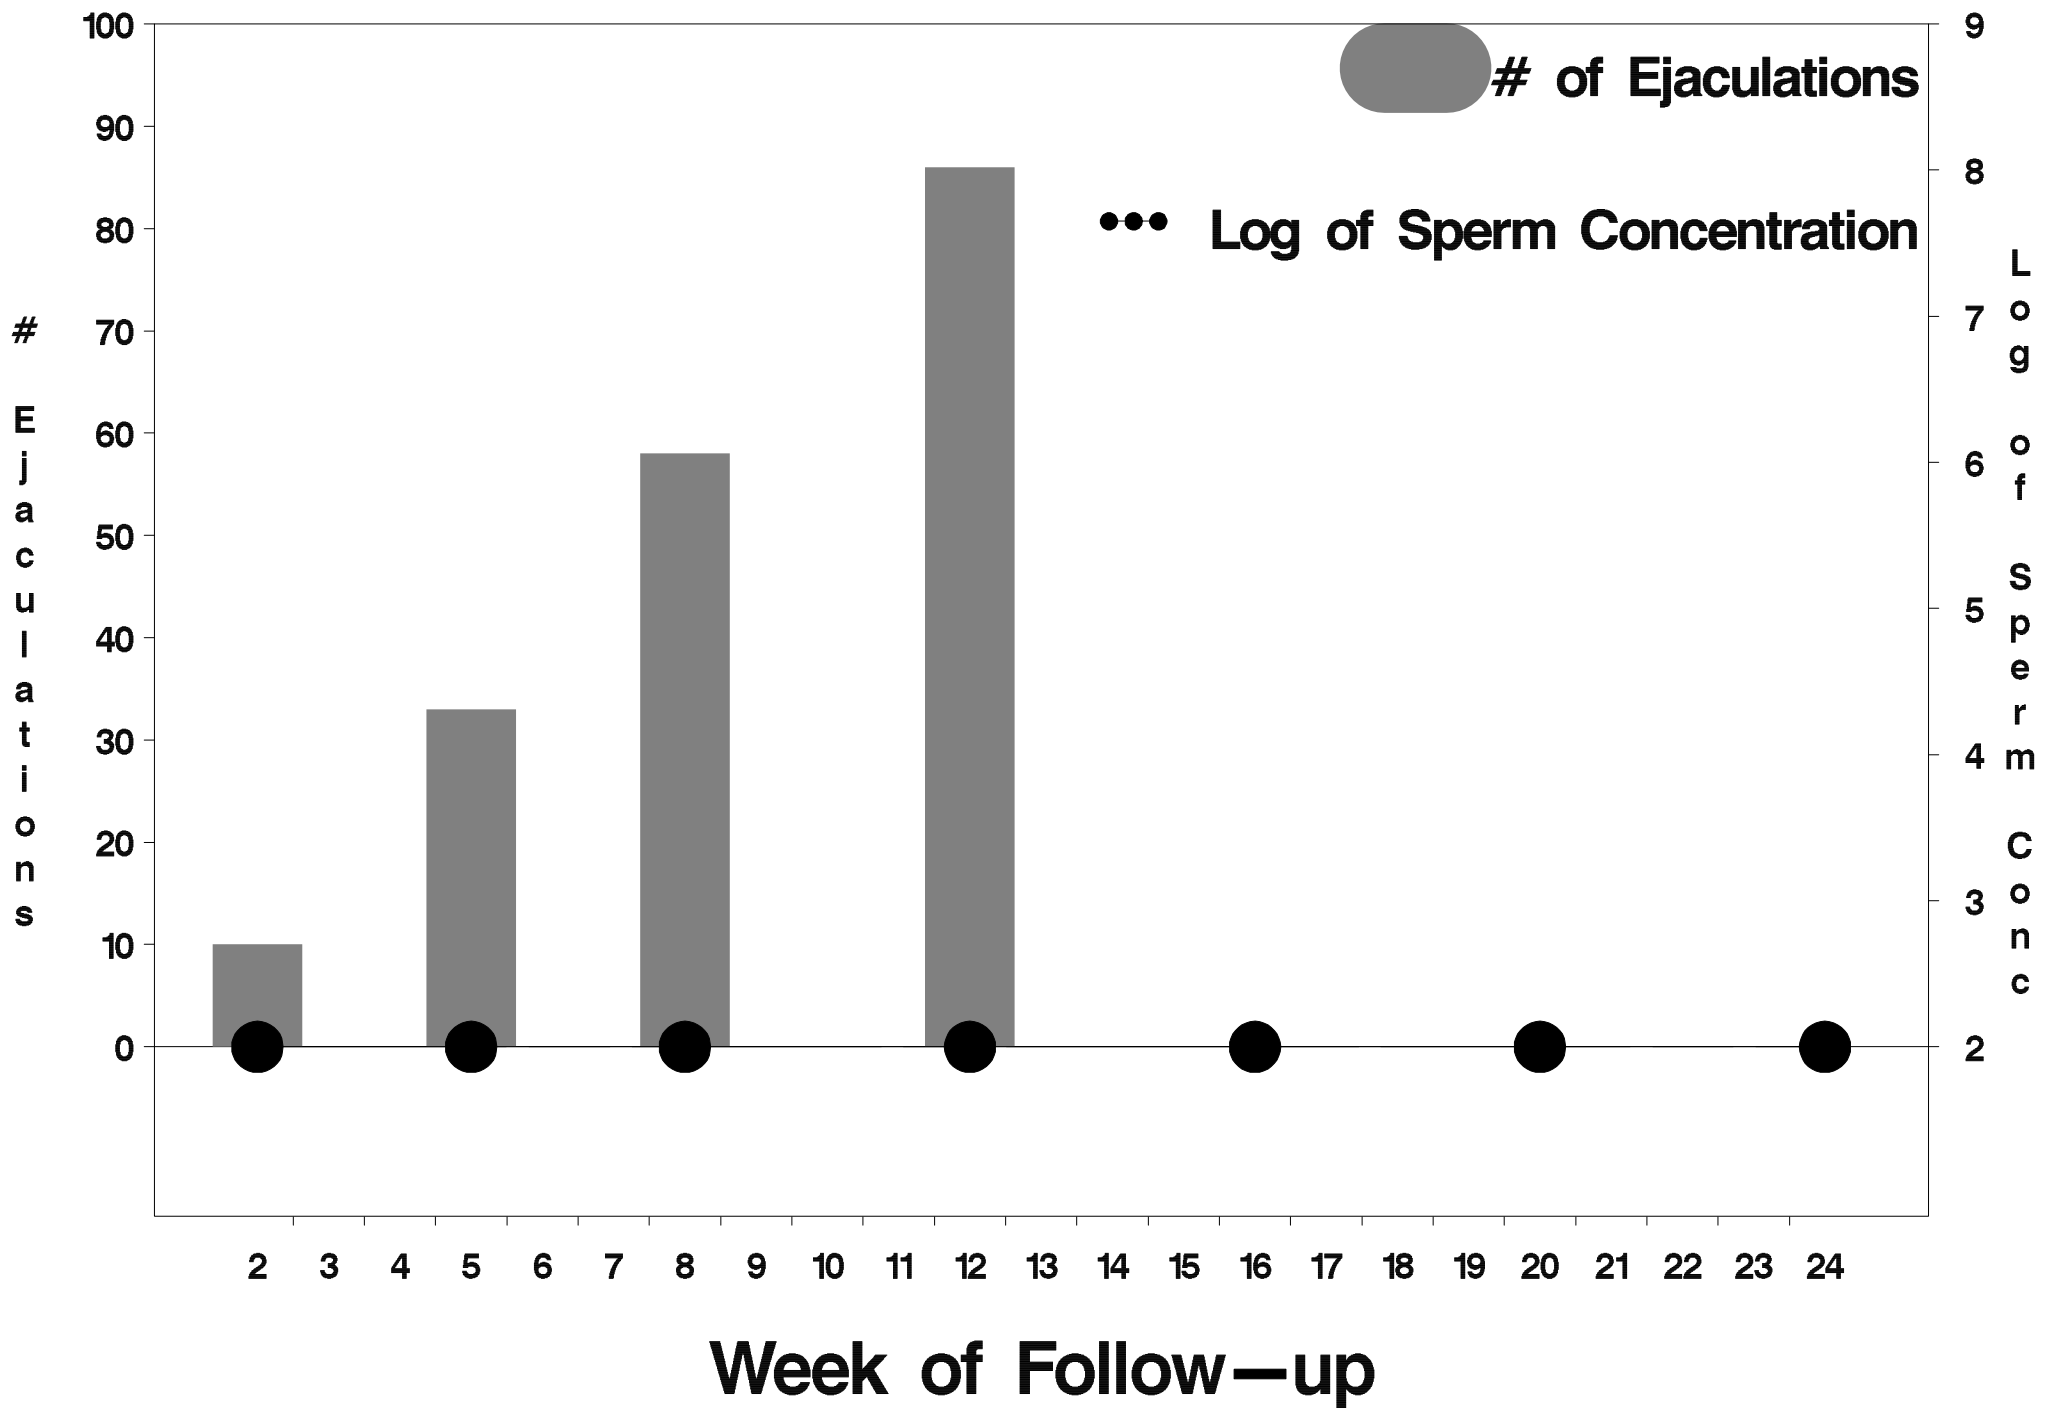

# Participant number= 775

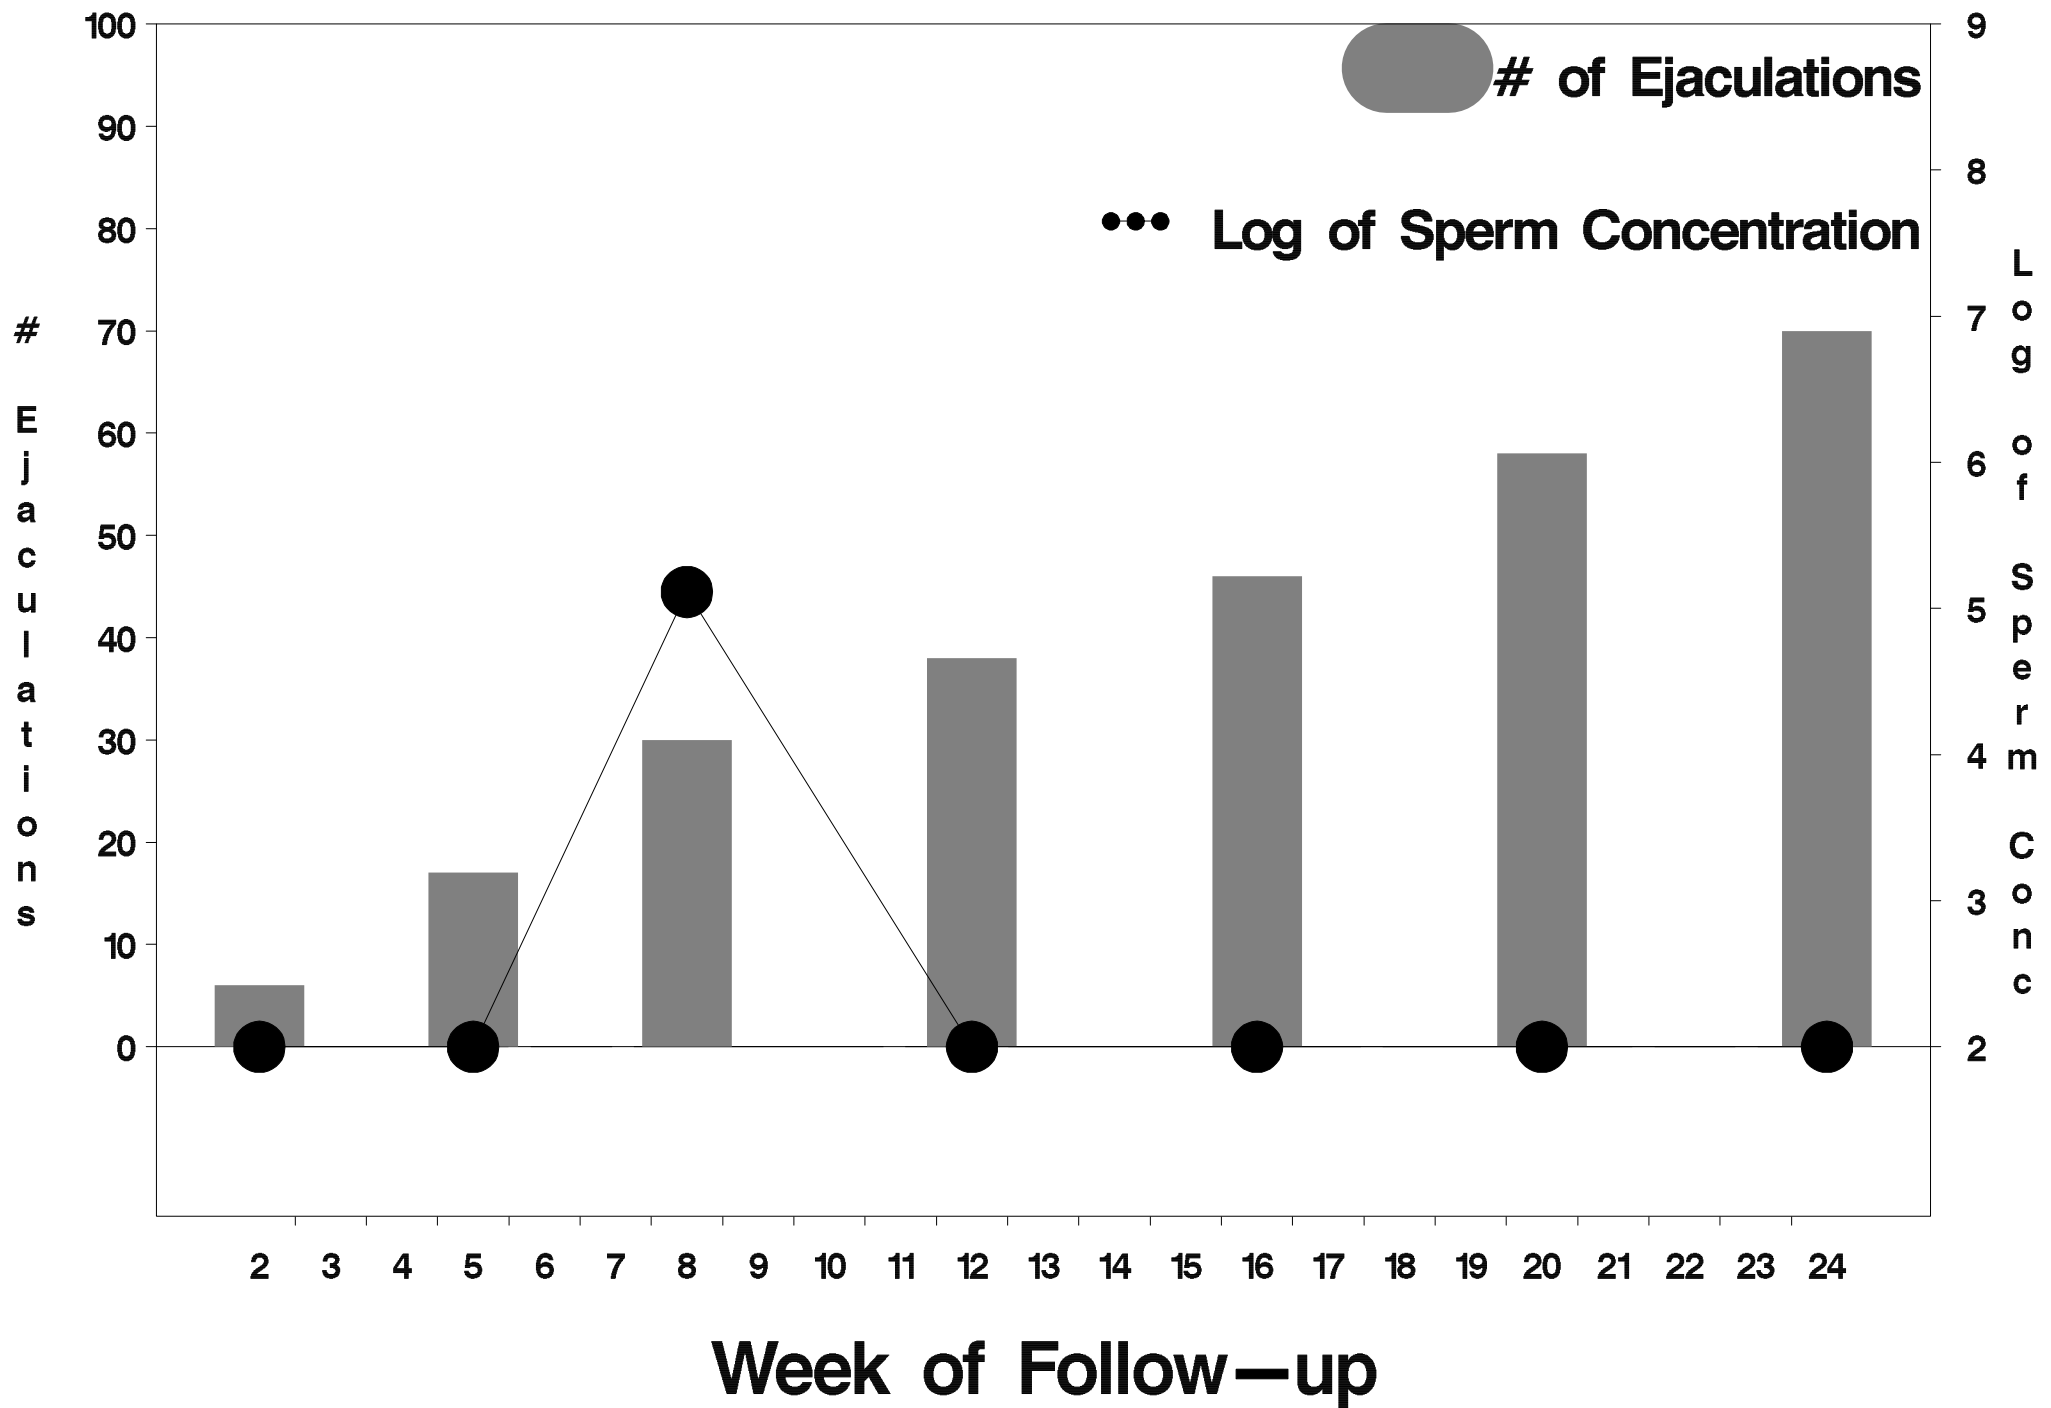

# Participant number= 776

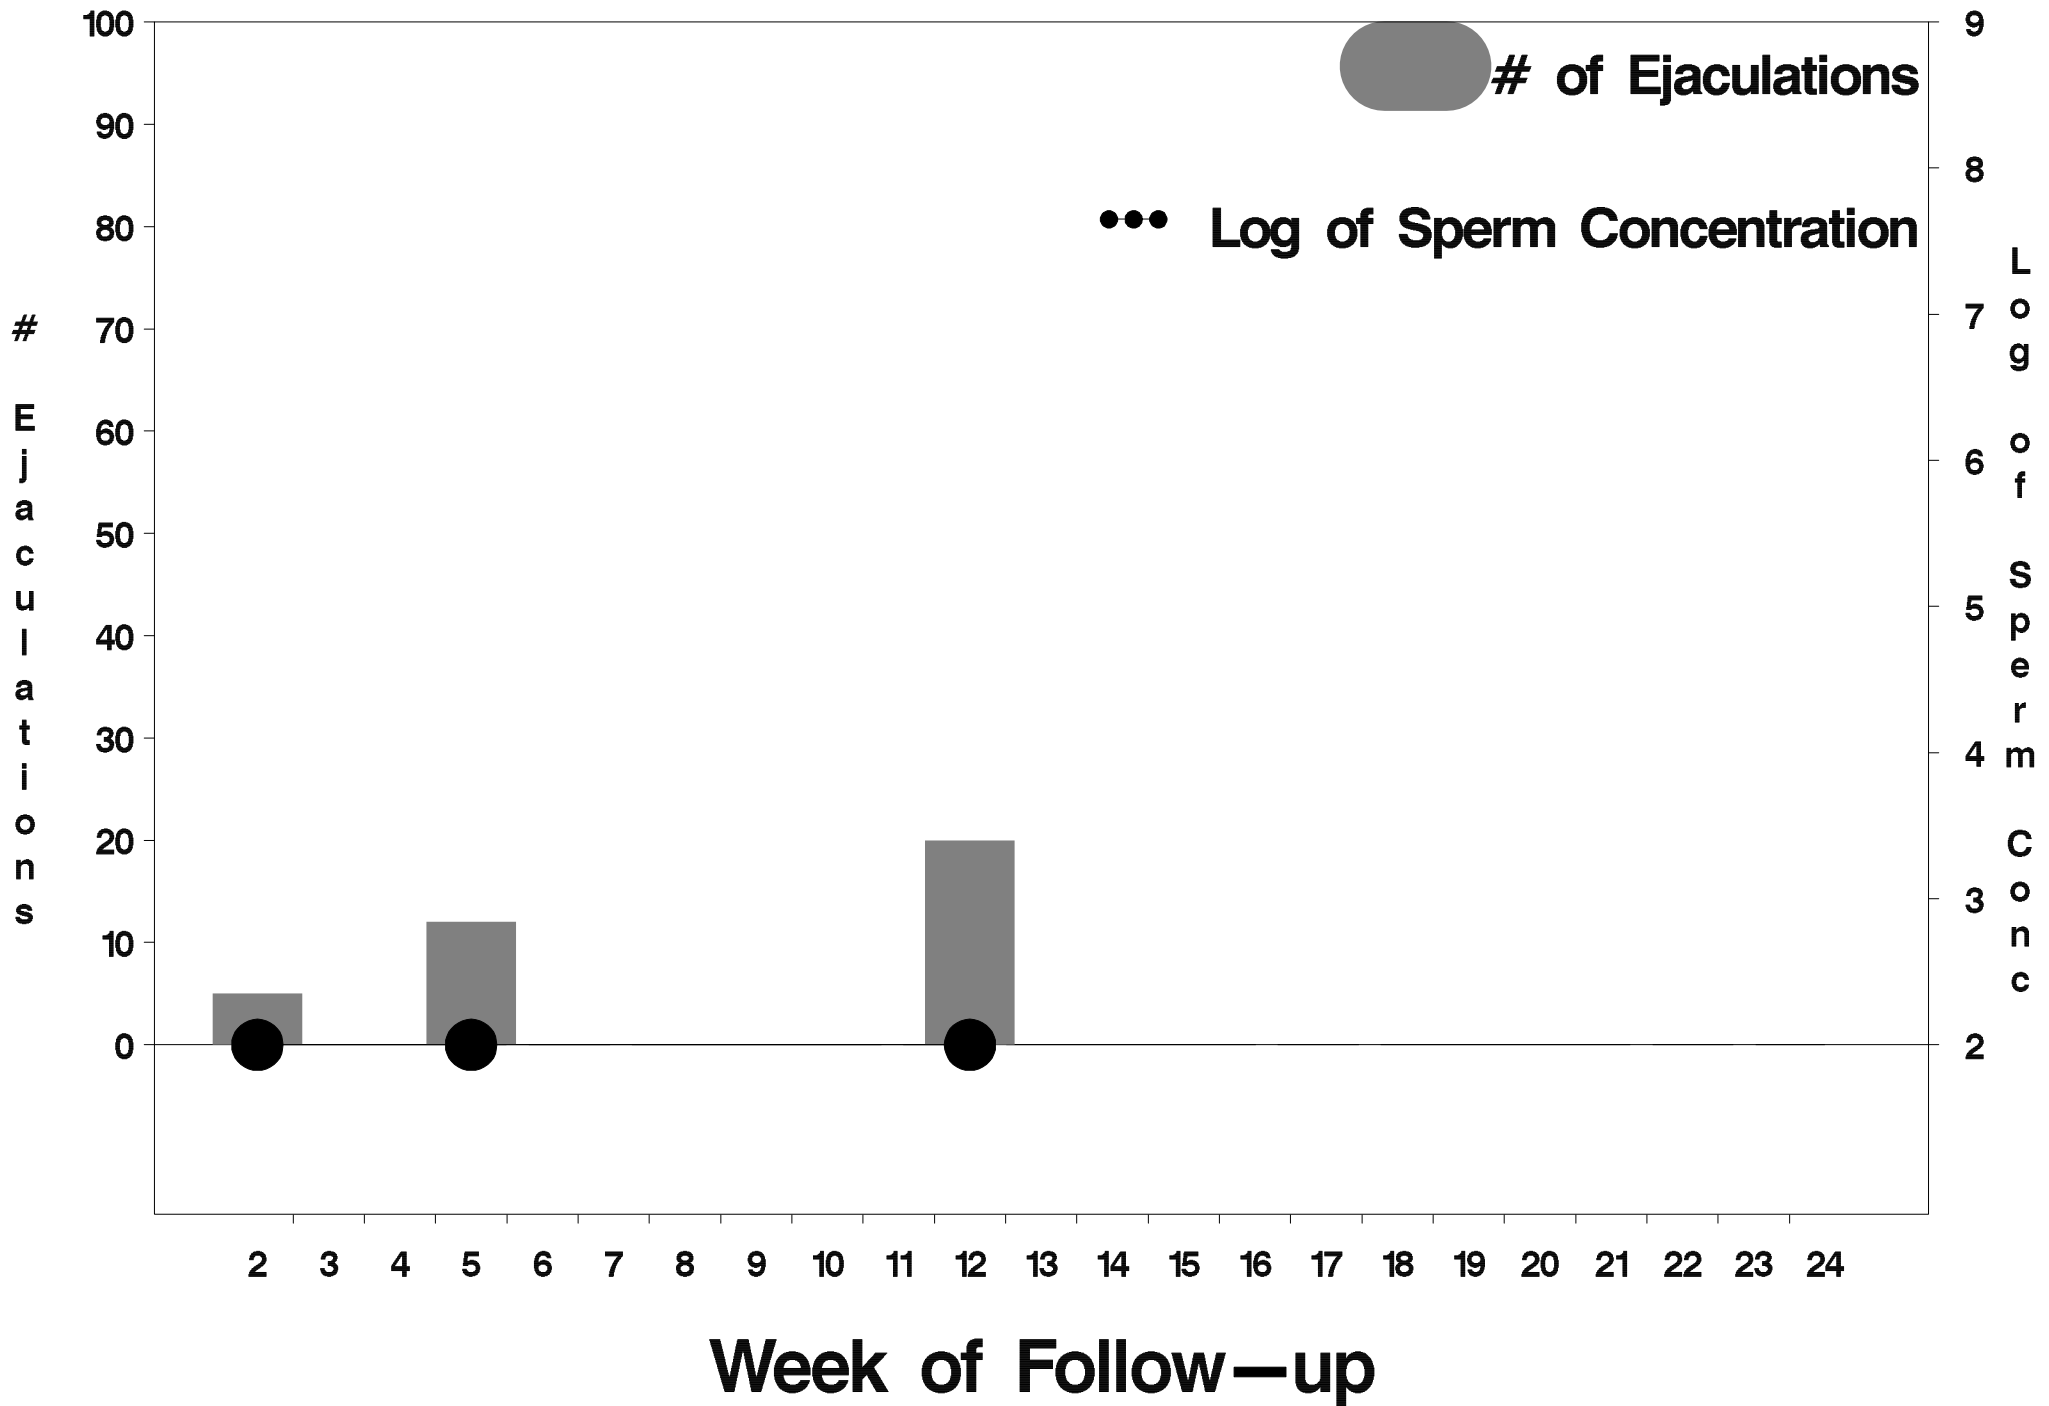

# Participant number= 777

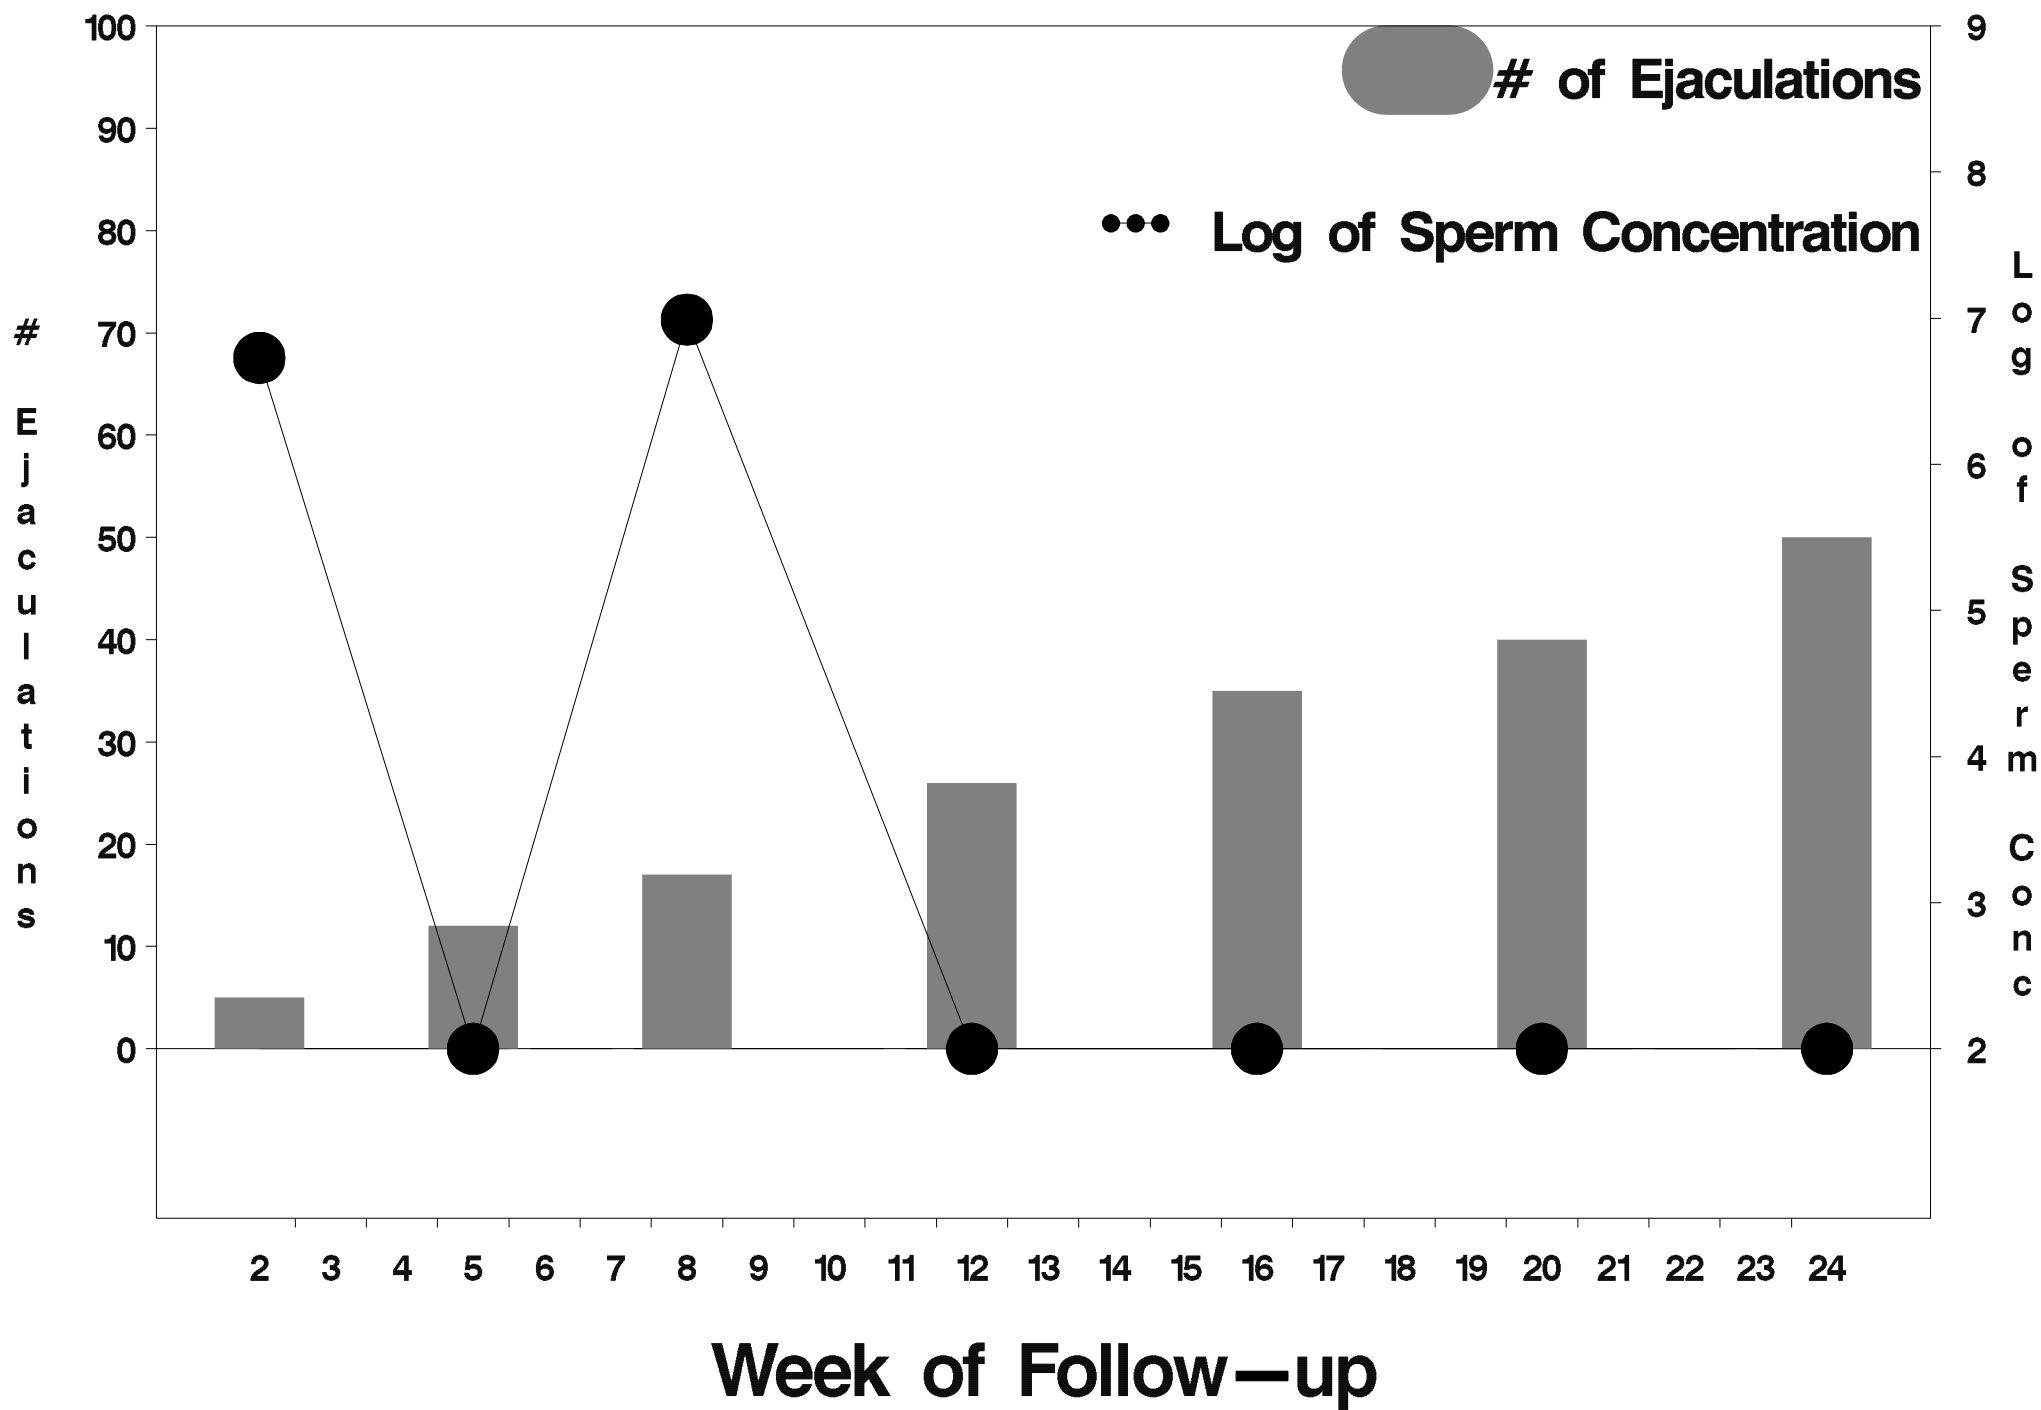

# Participant number= 778

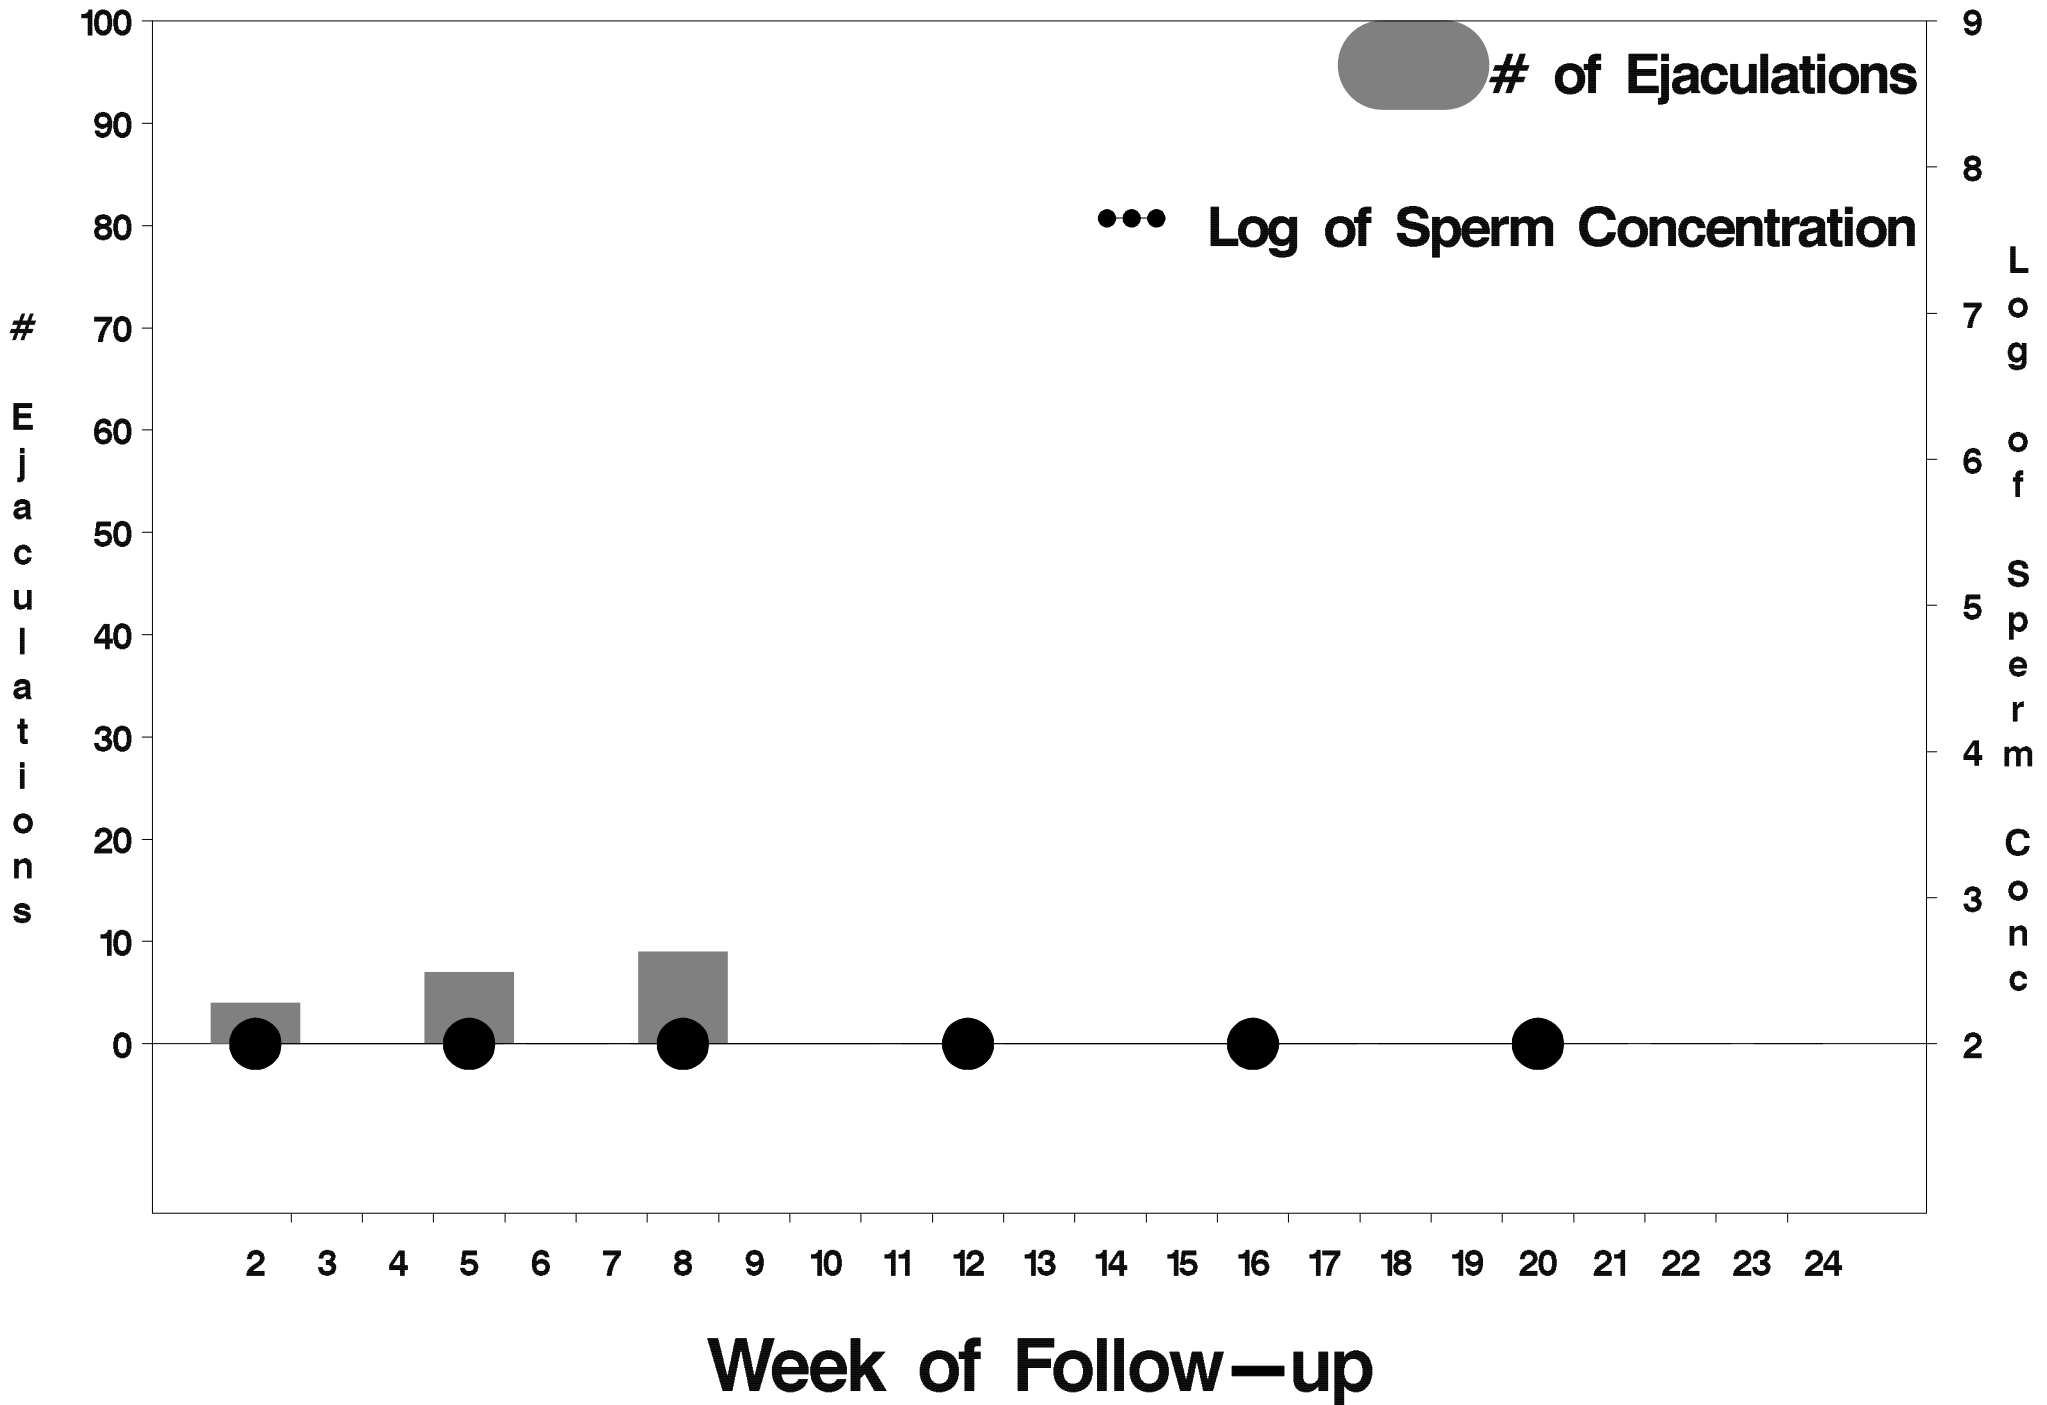



# Participant number= 779

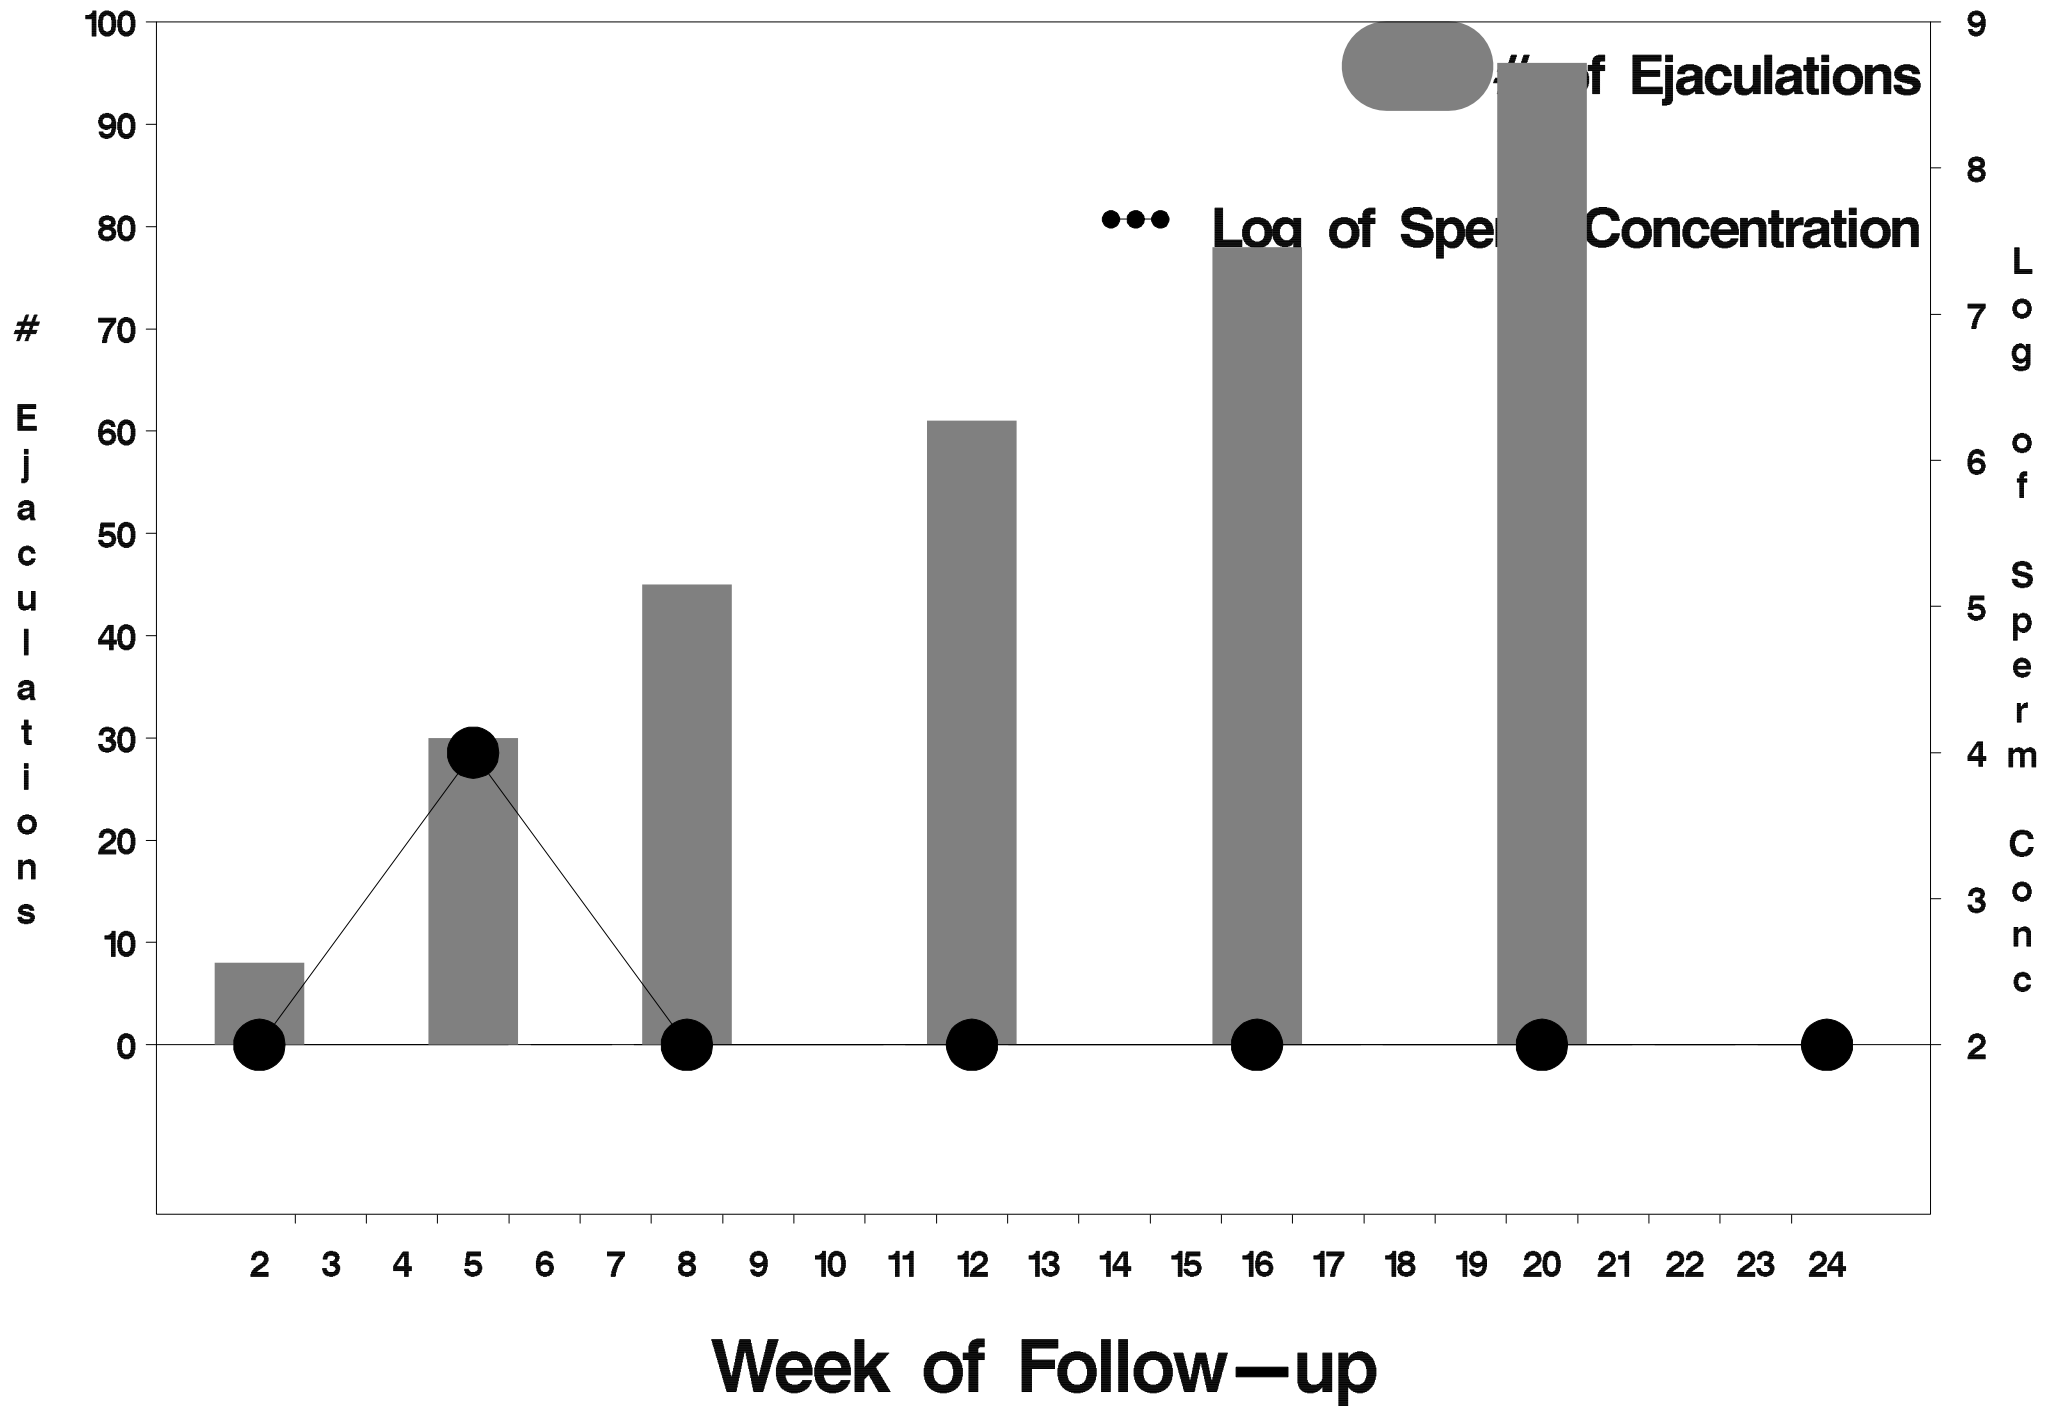

# Participant number= 780

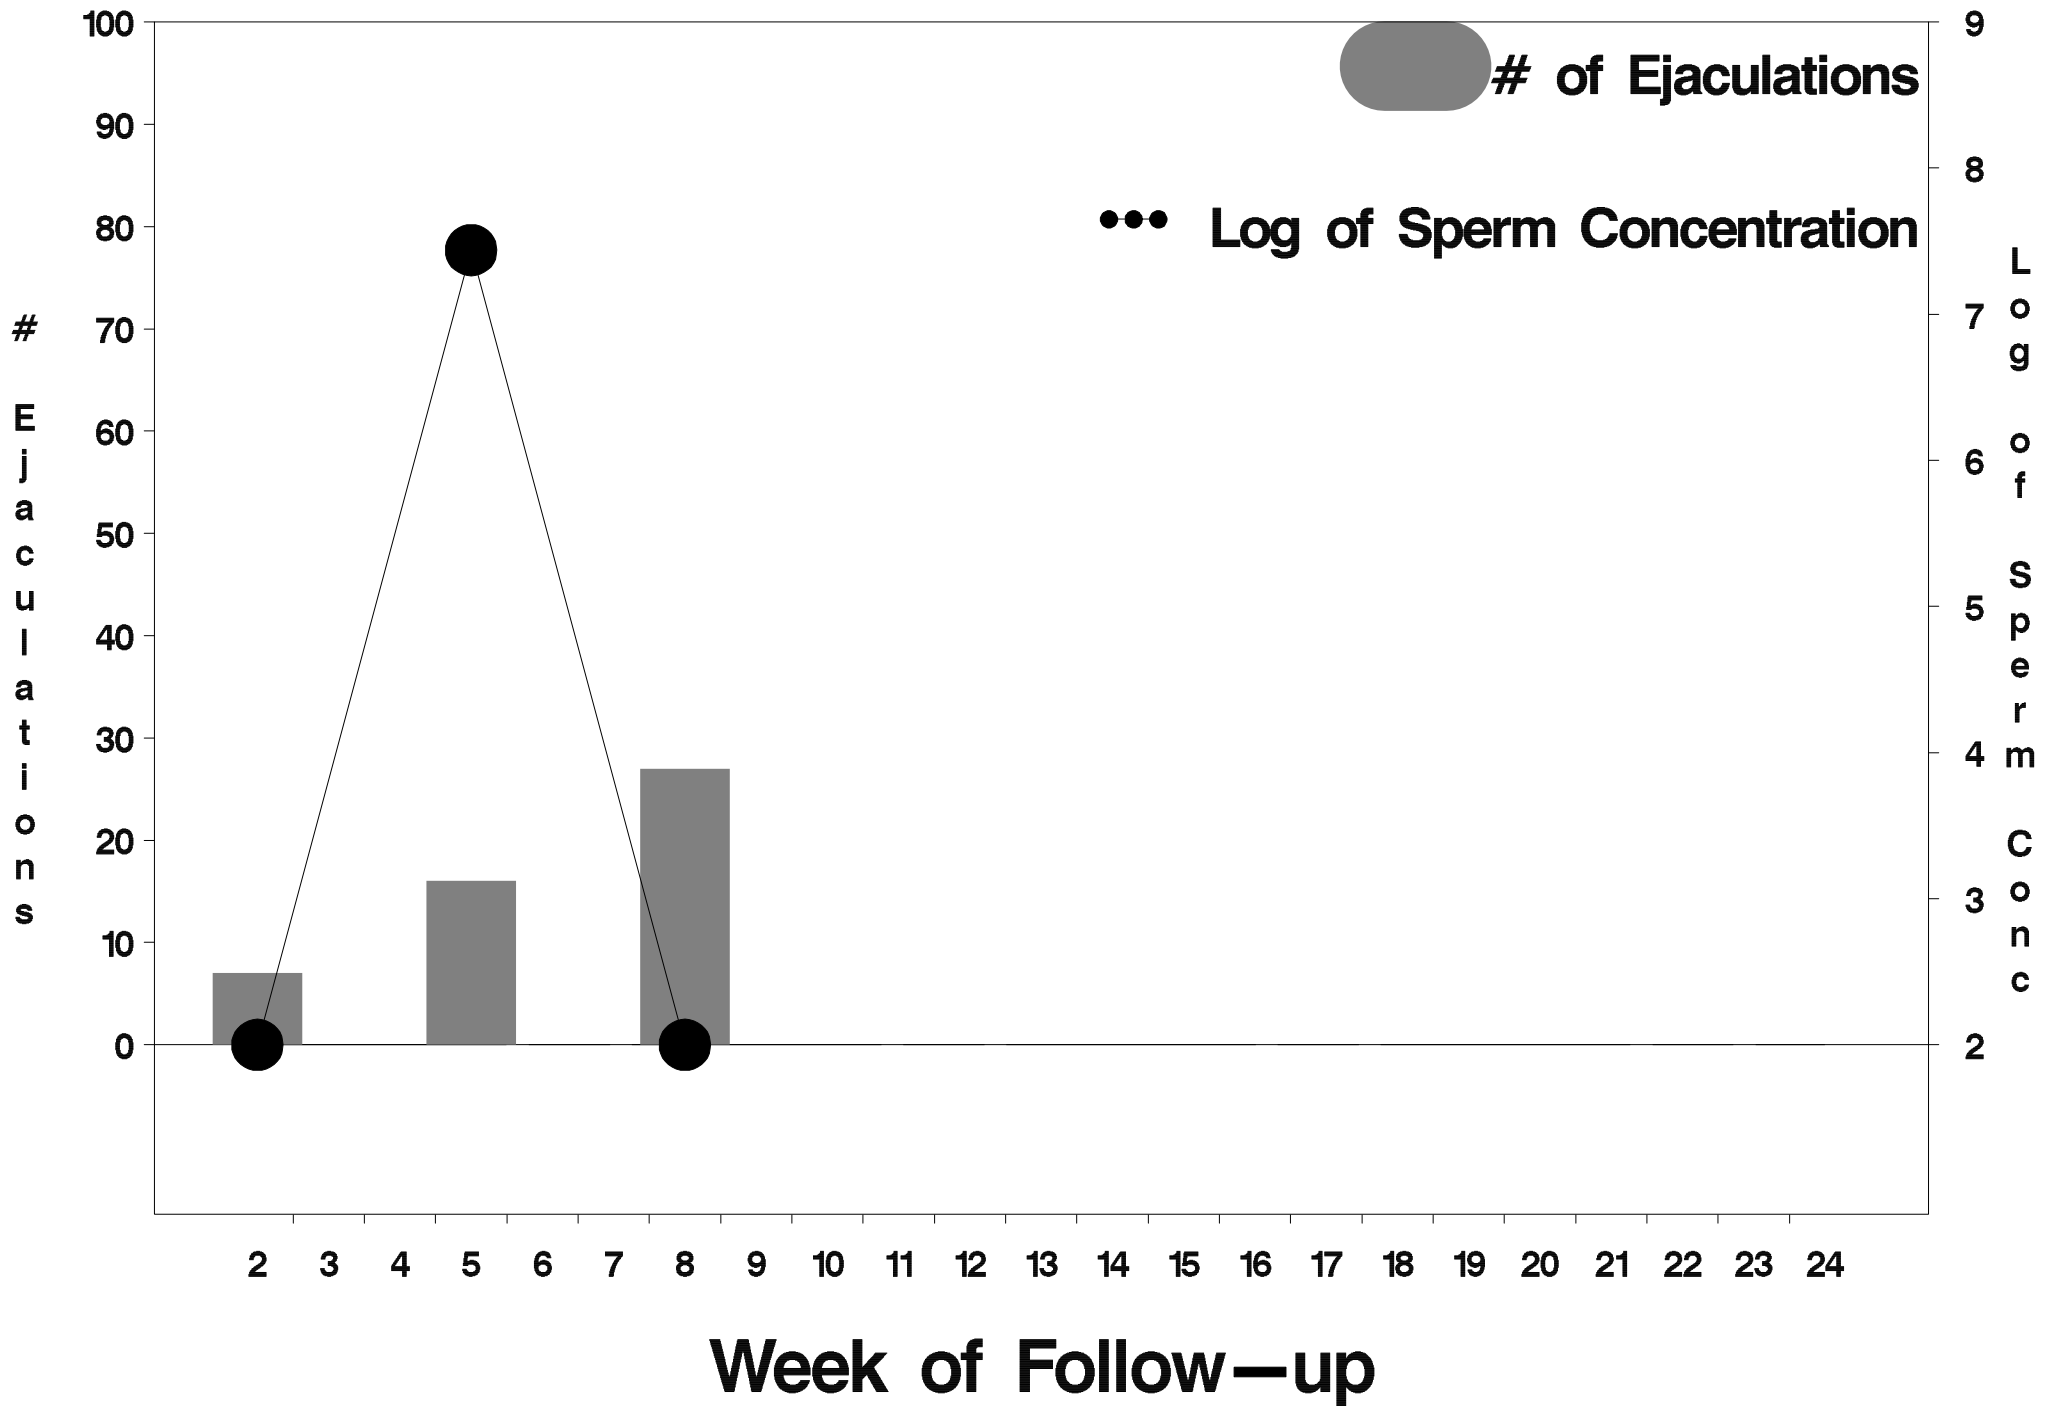

# Participant number= 781

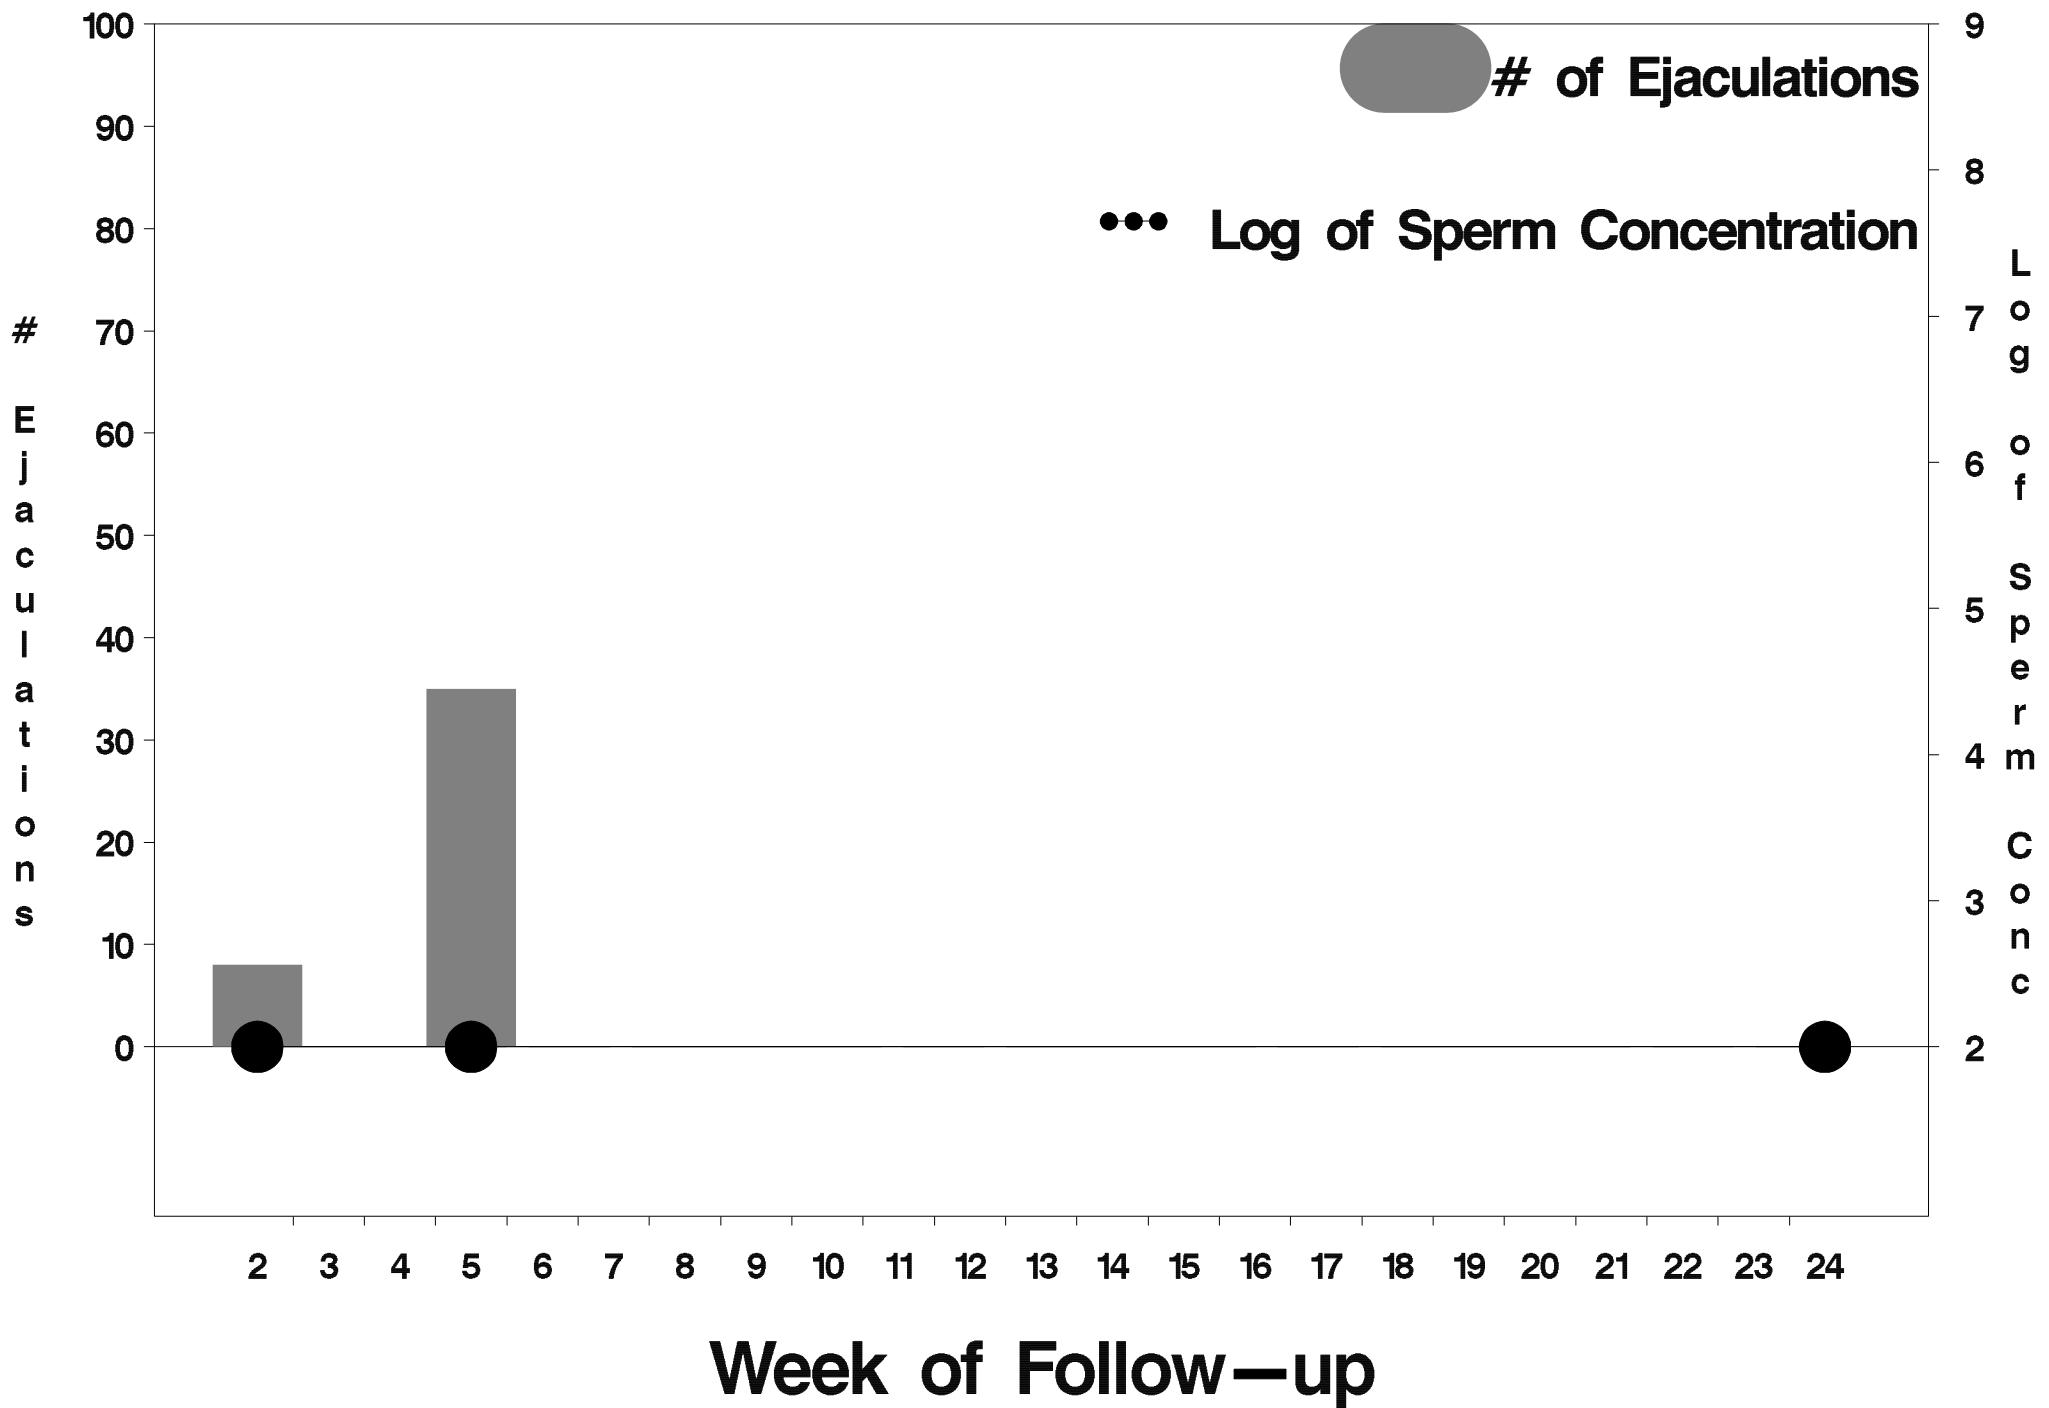

# Participant number= 782

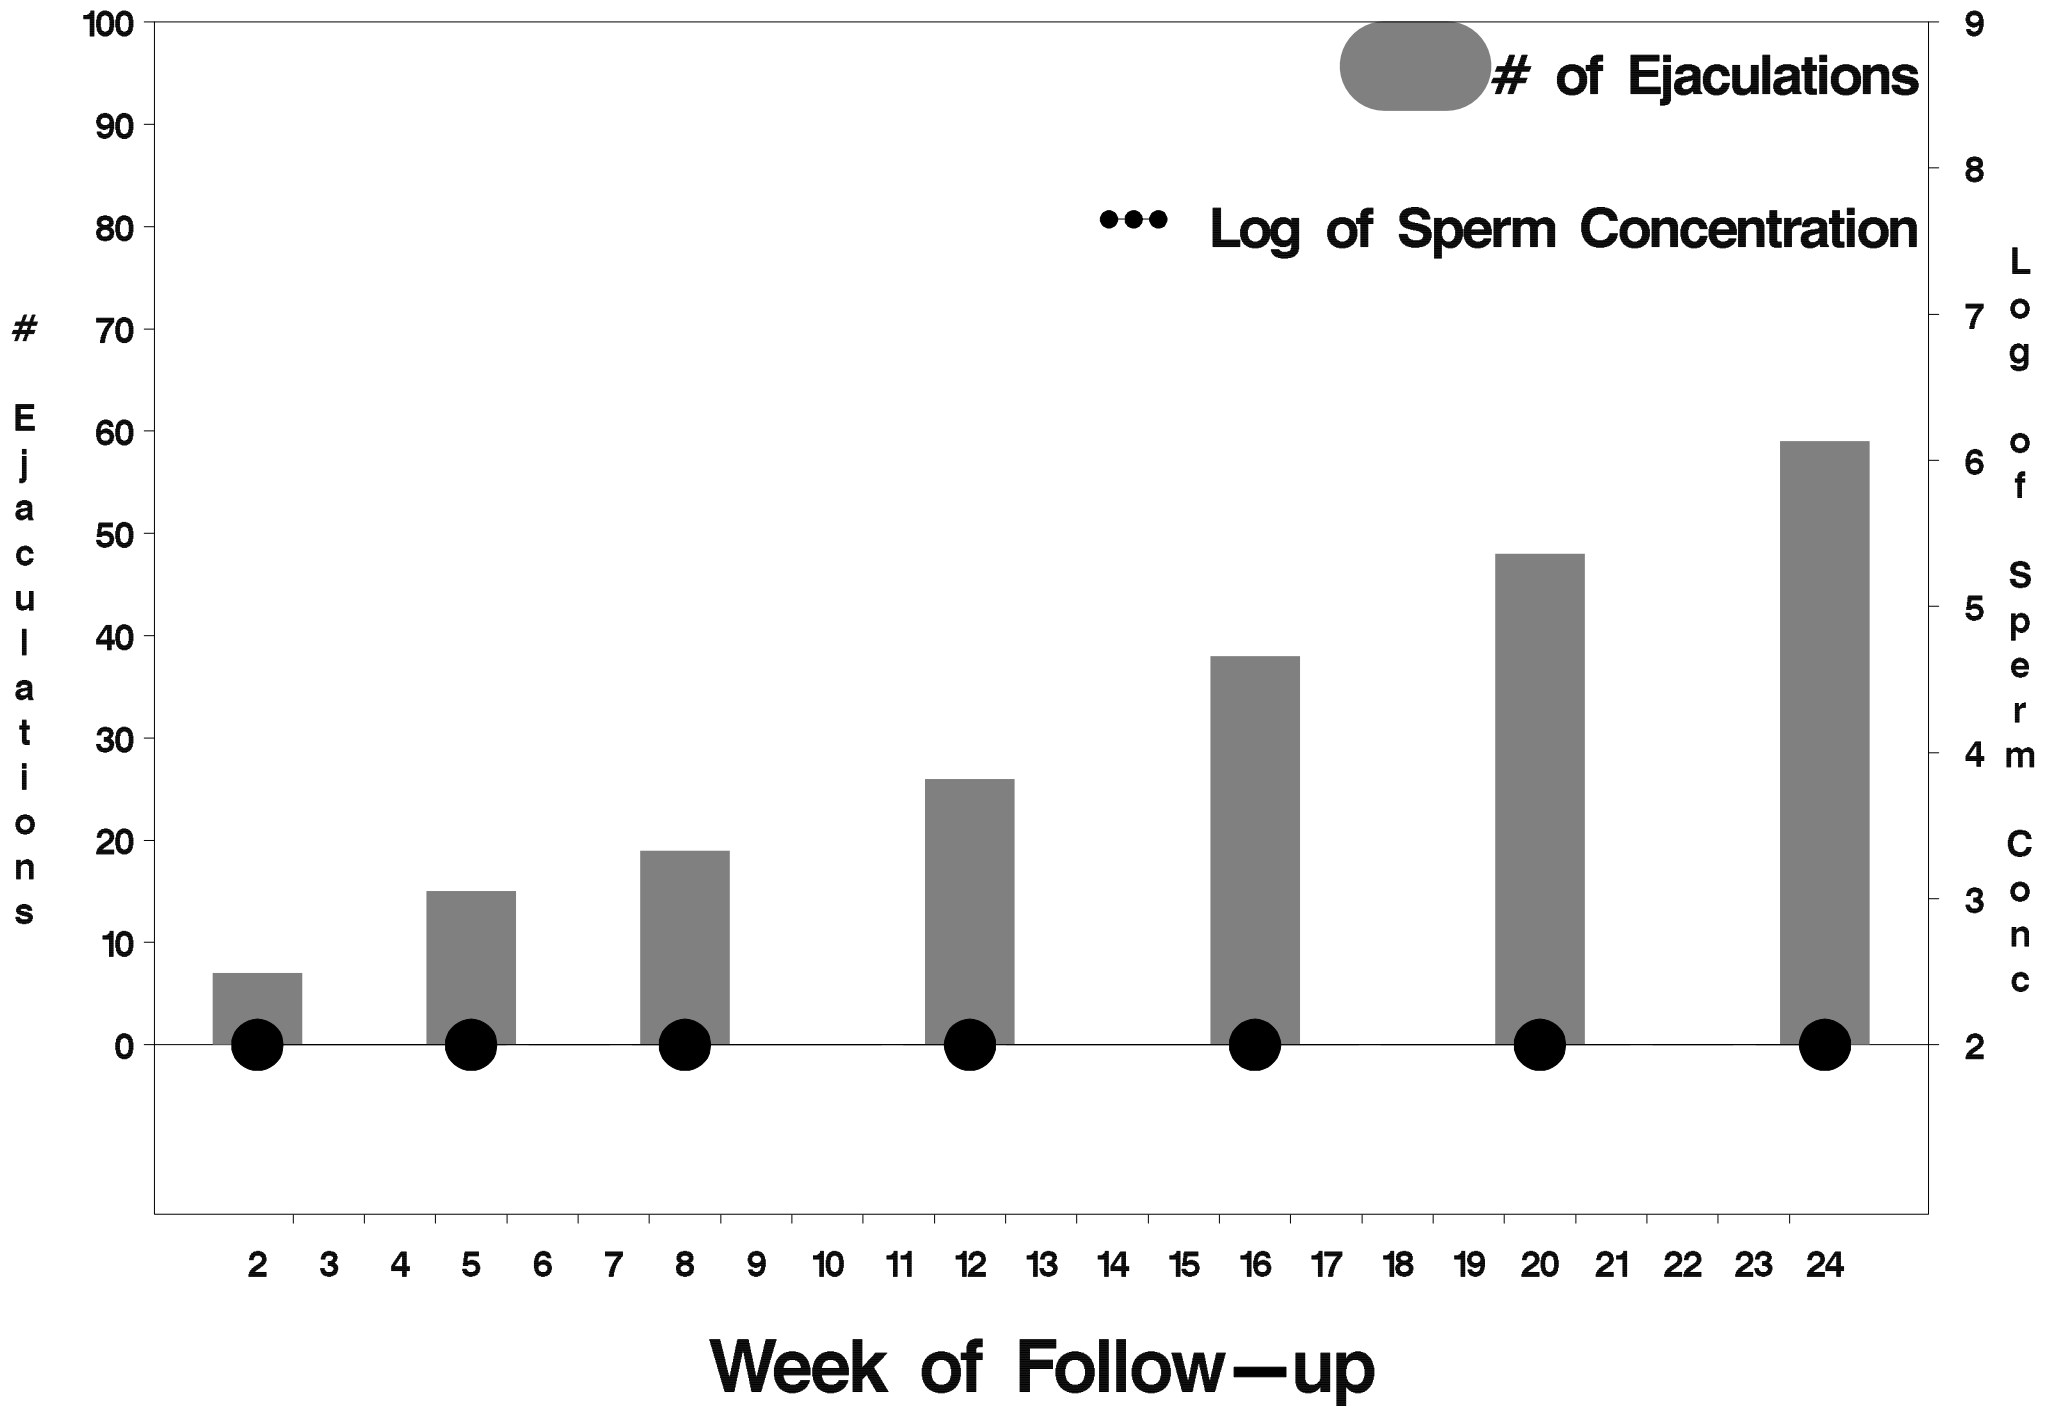

# Participant number= 783

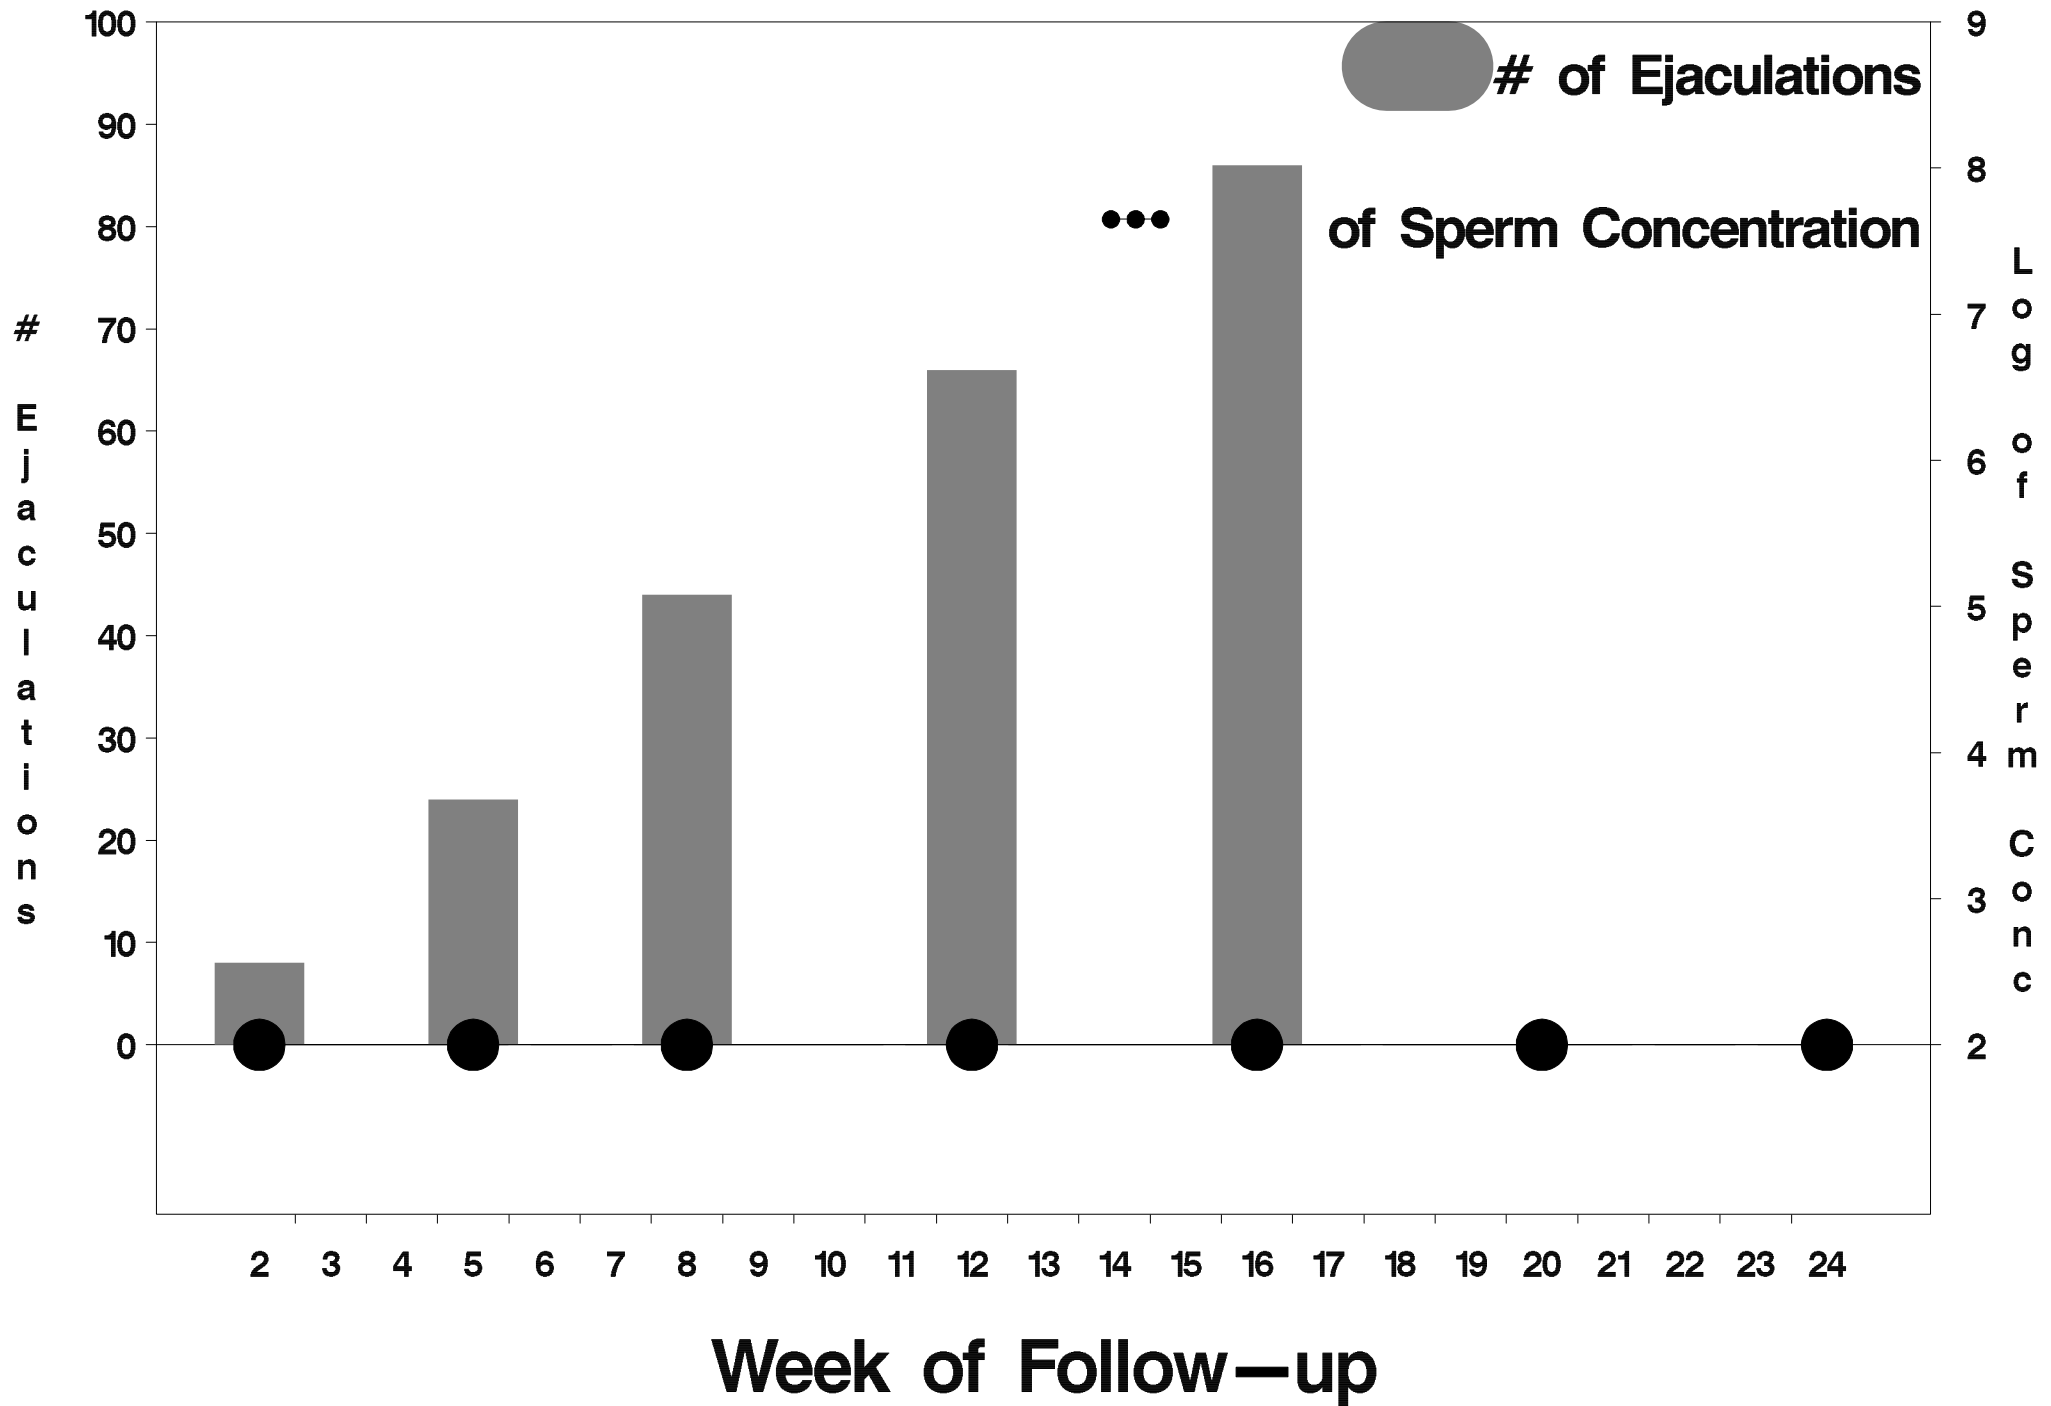

# Participant number= 784

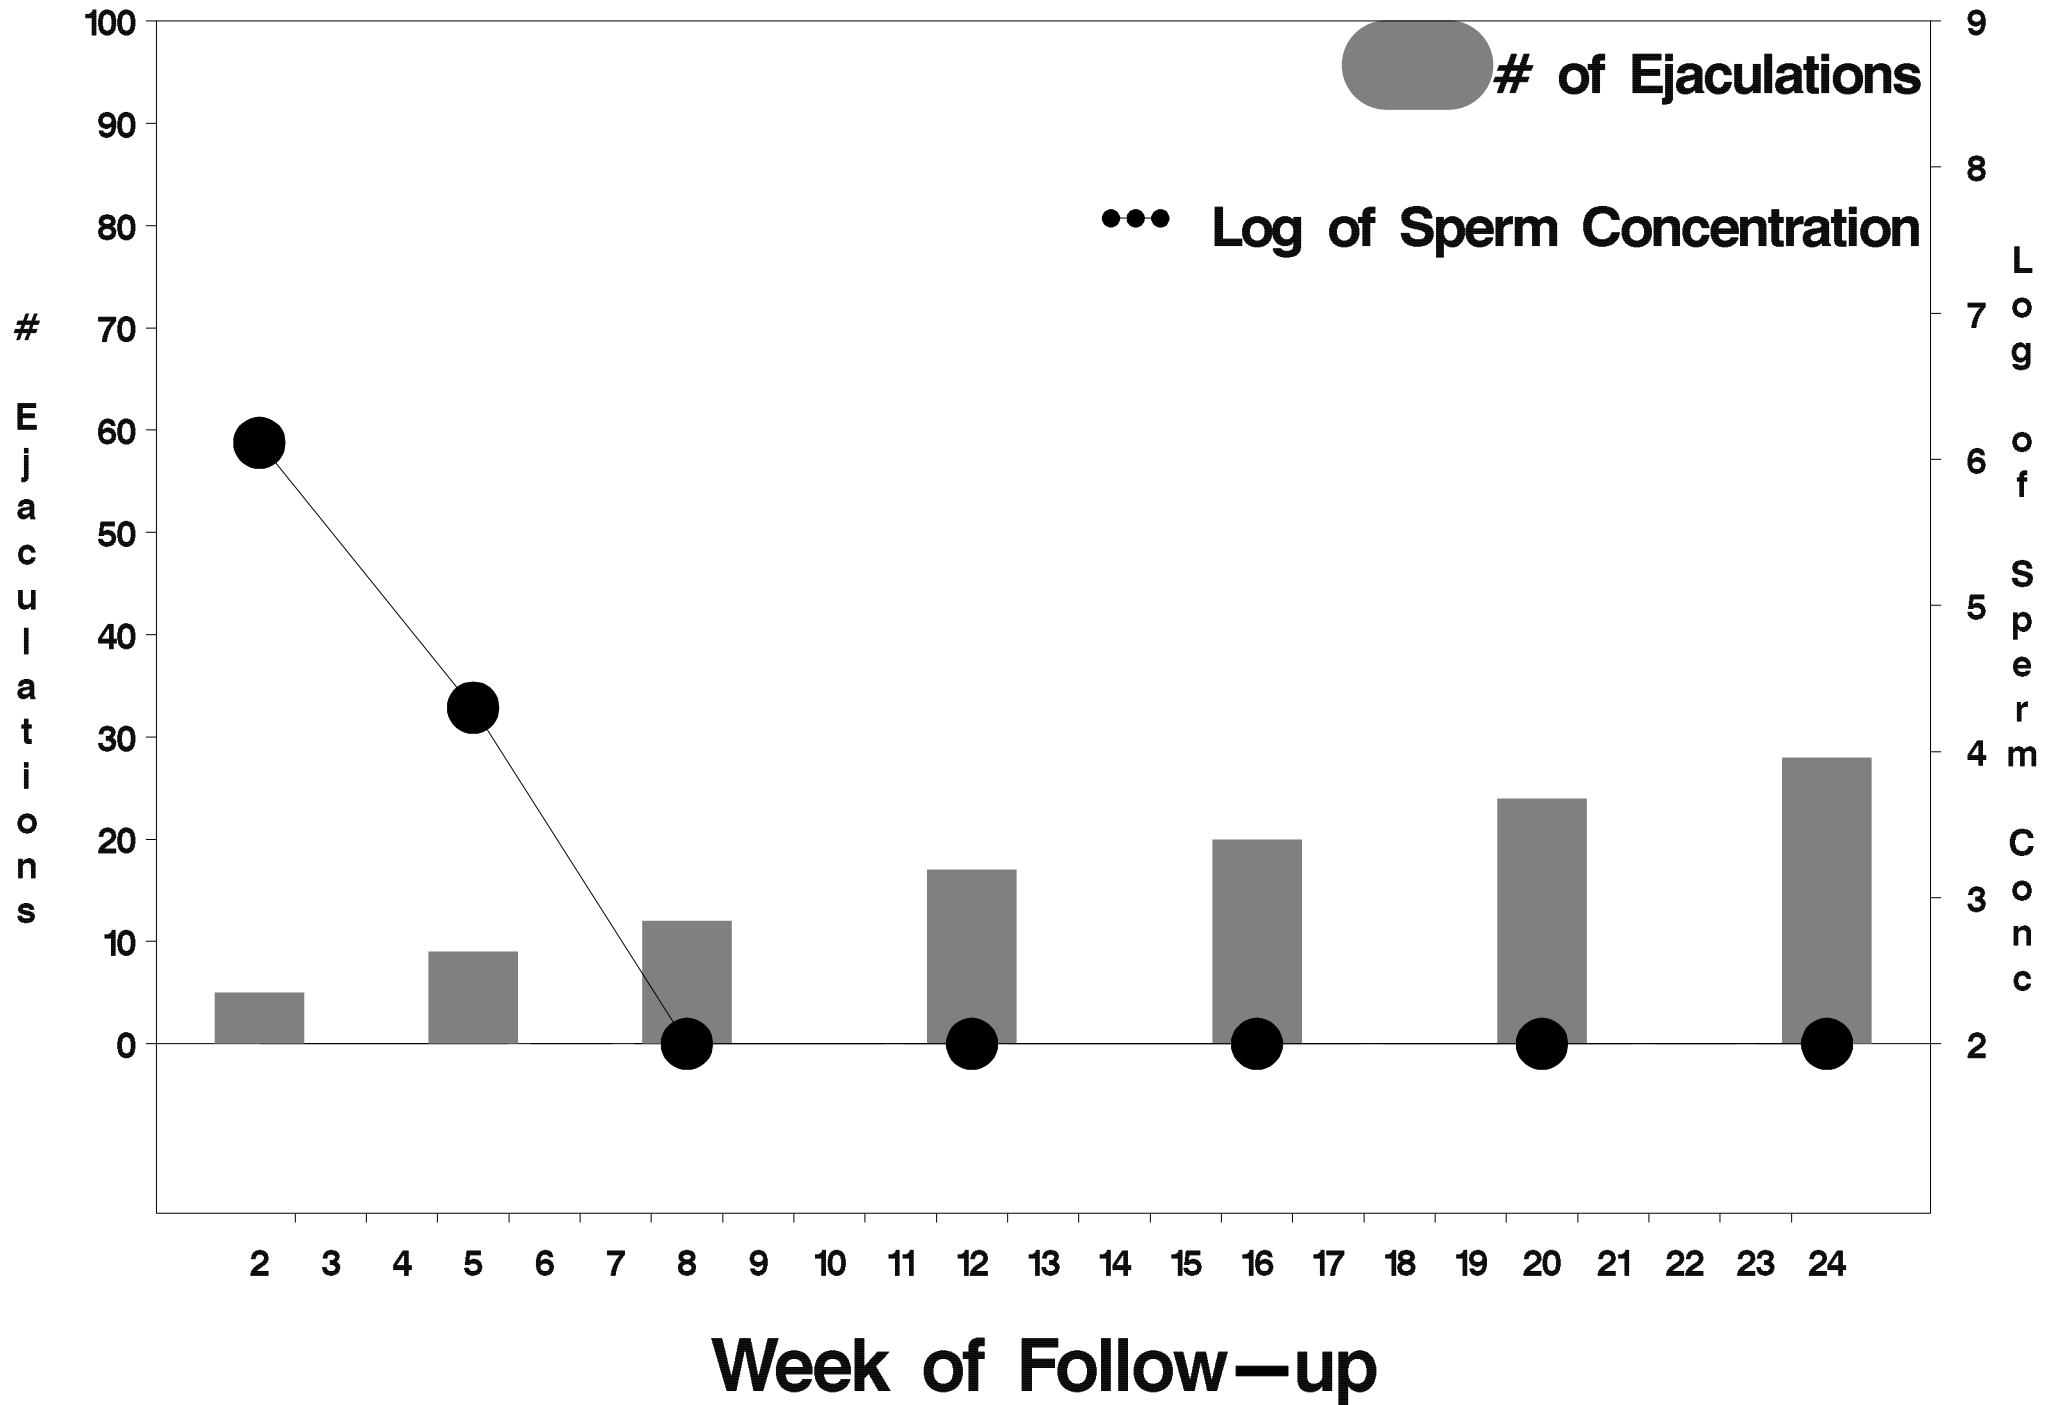

# Participant number= 786

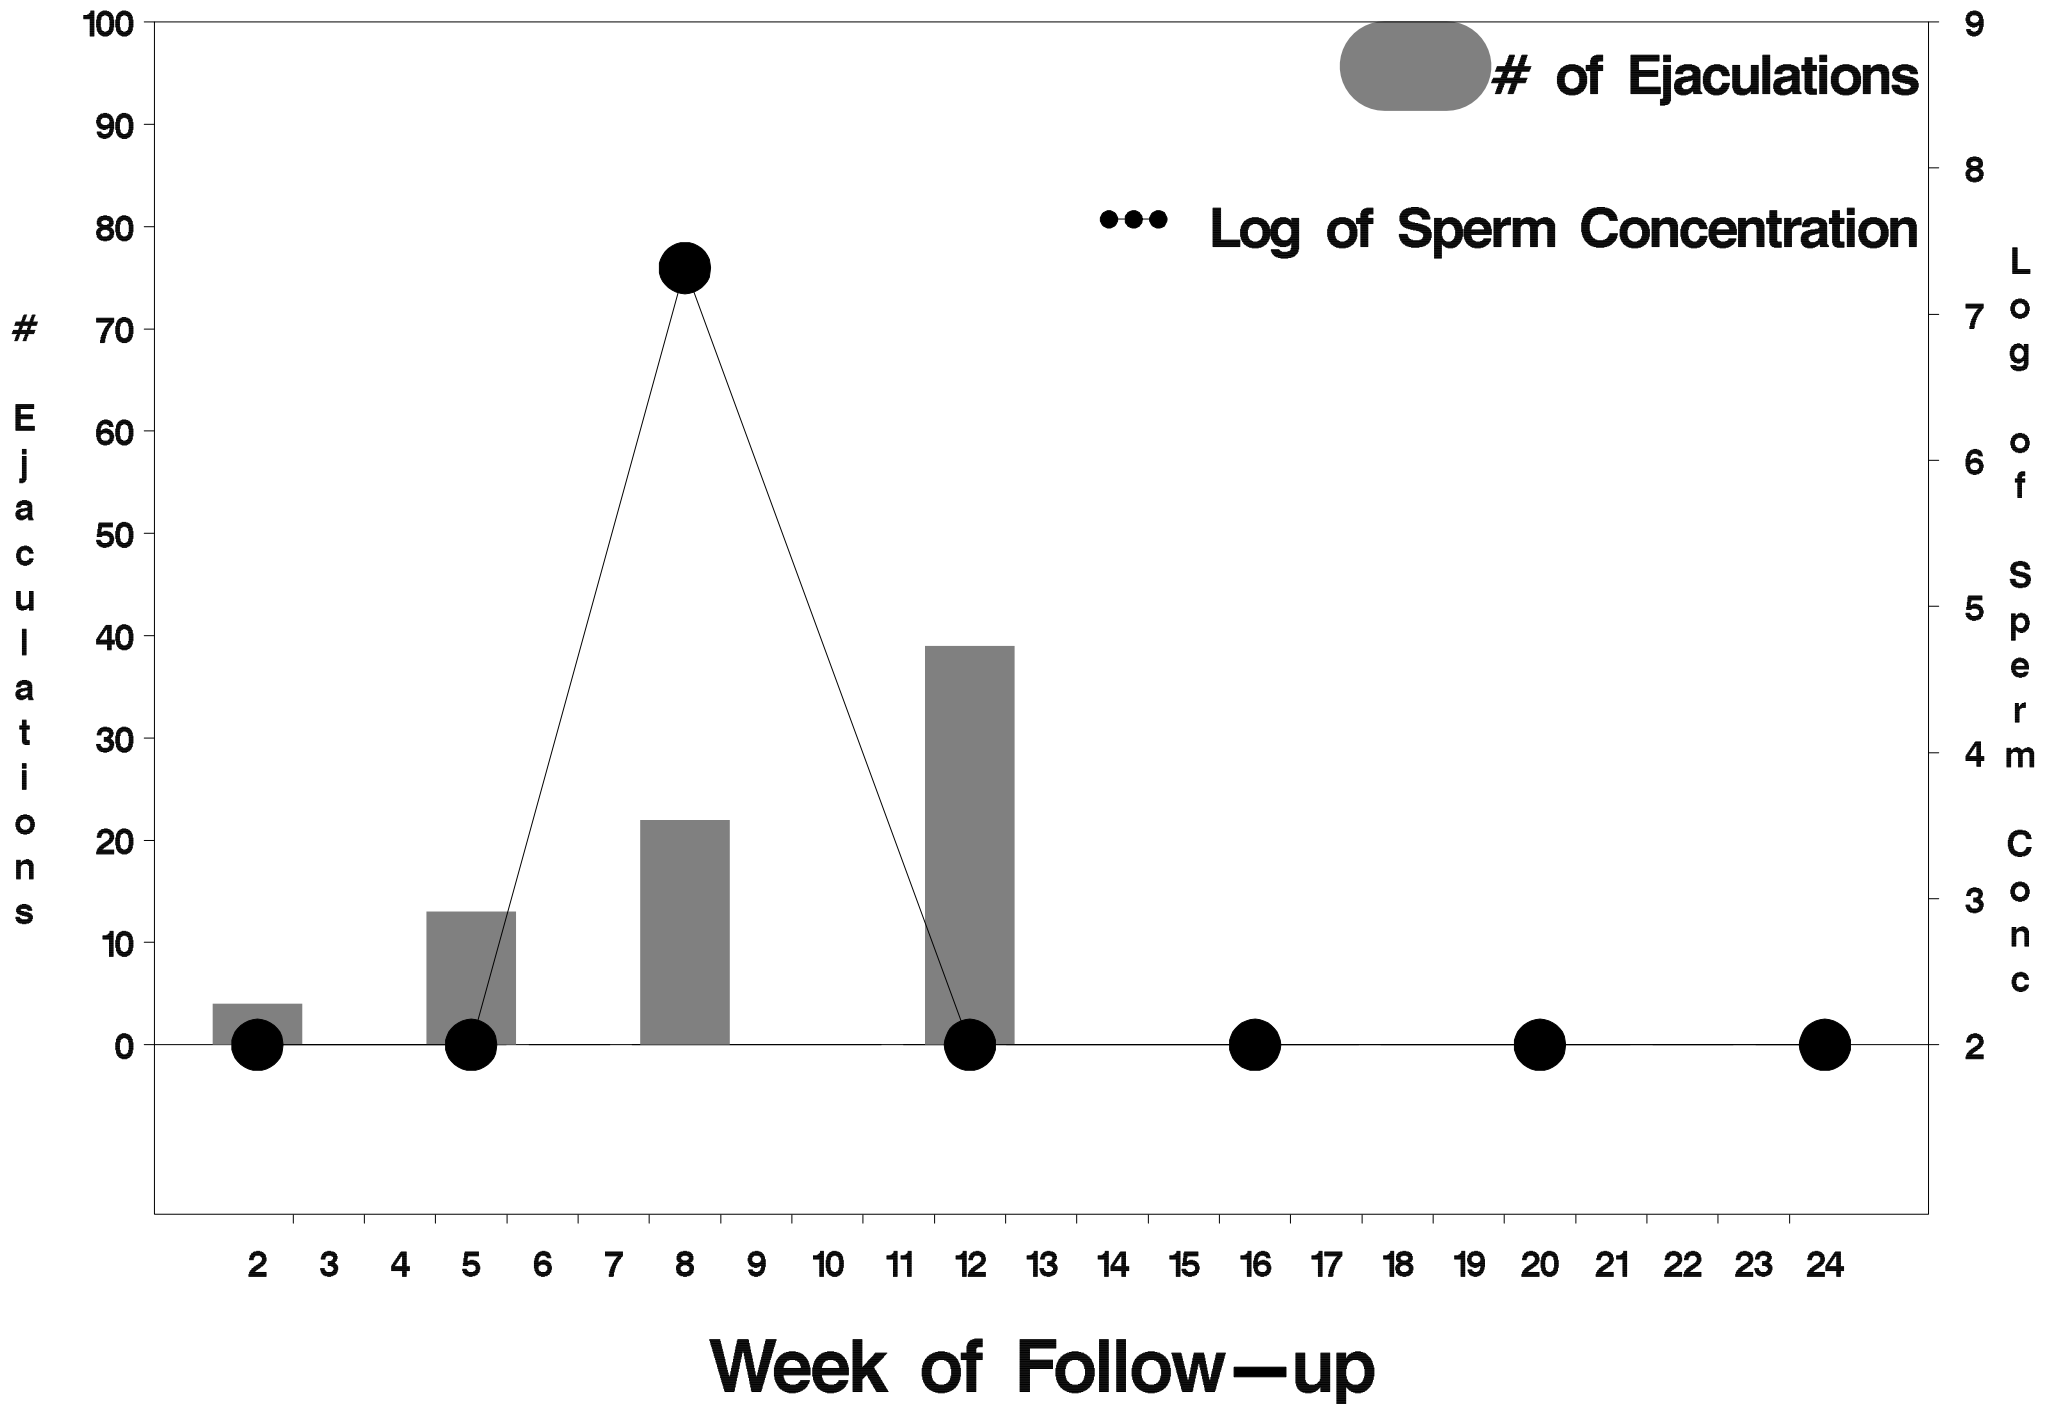

# Participant number= 787

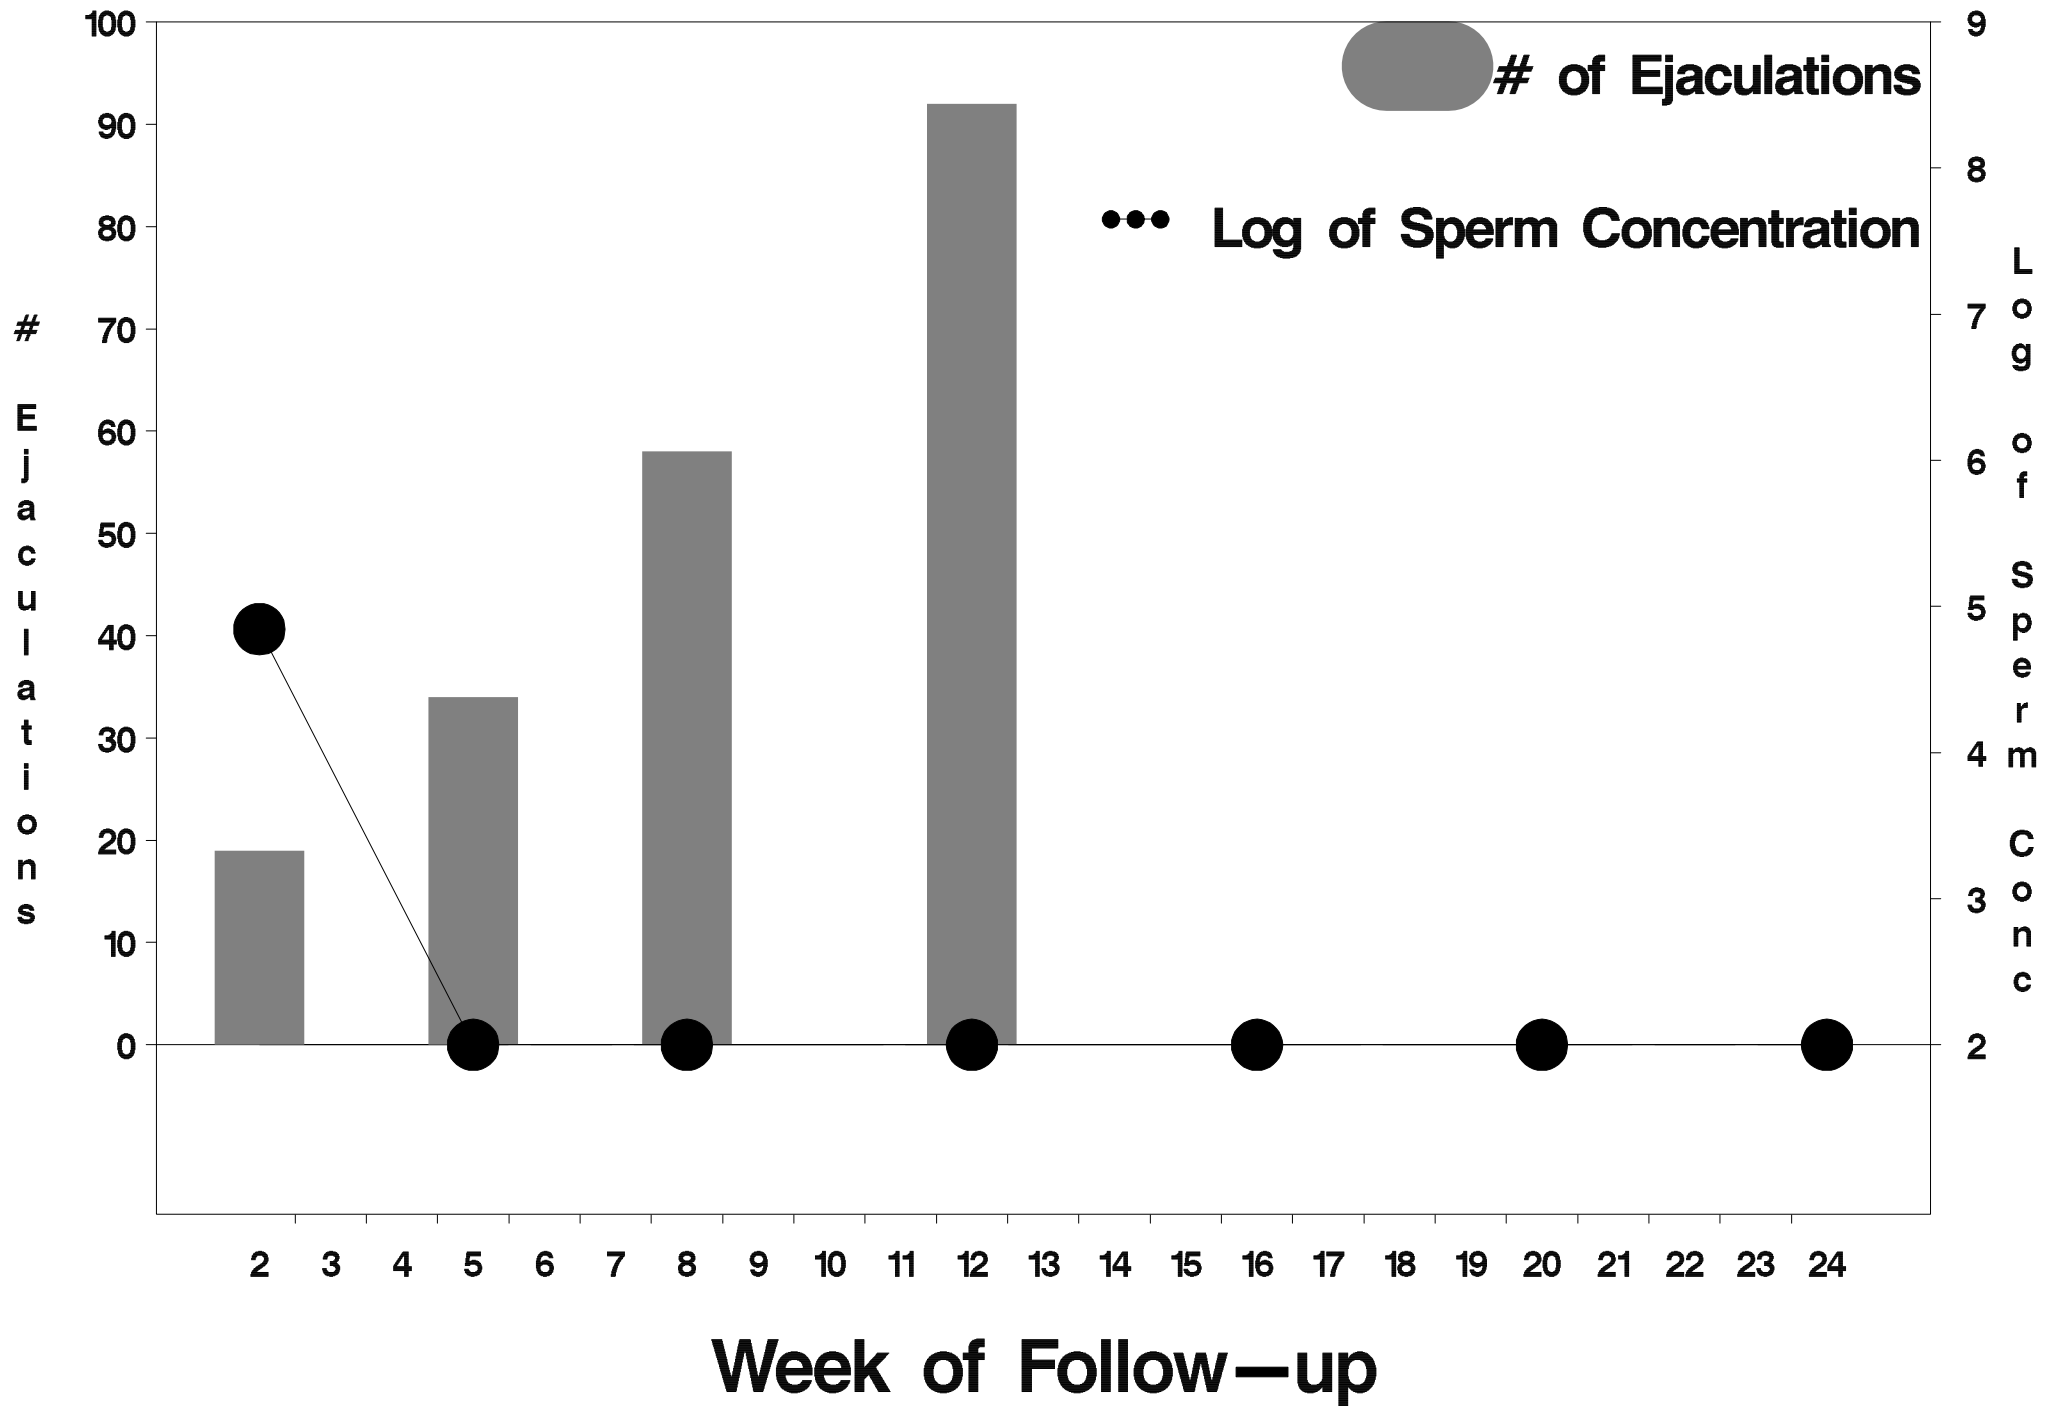



# Participant number= 788

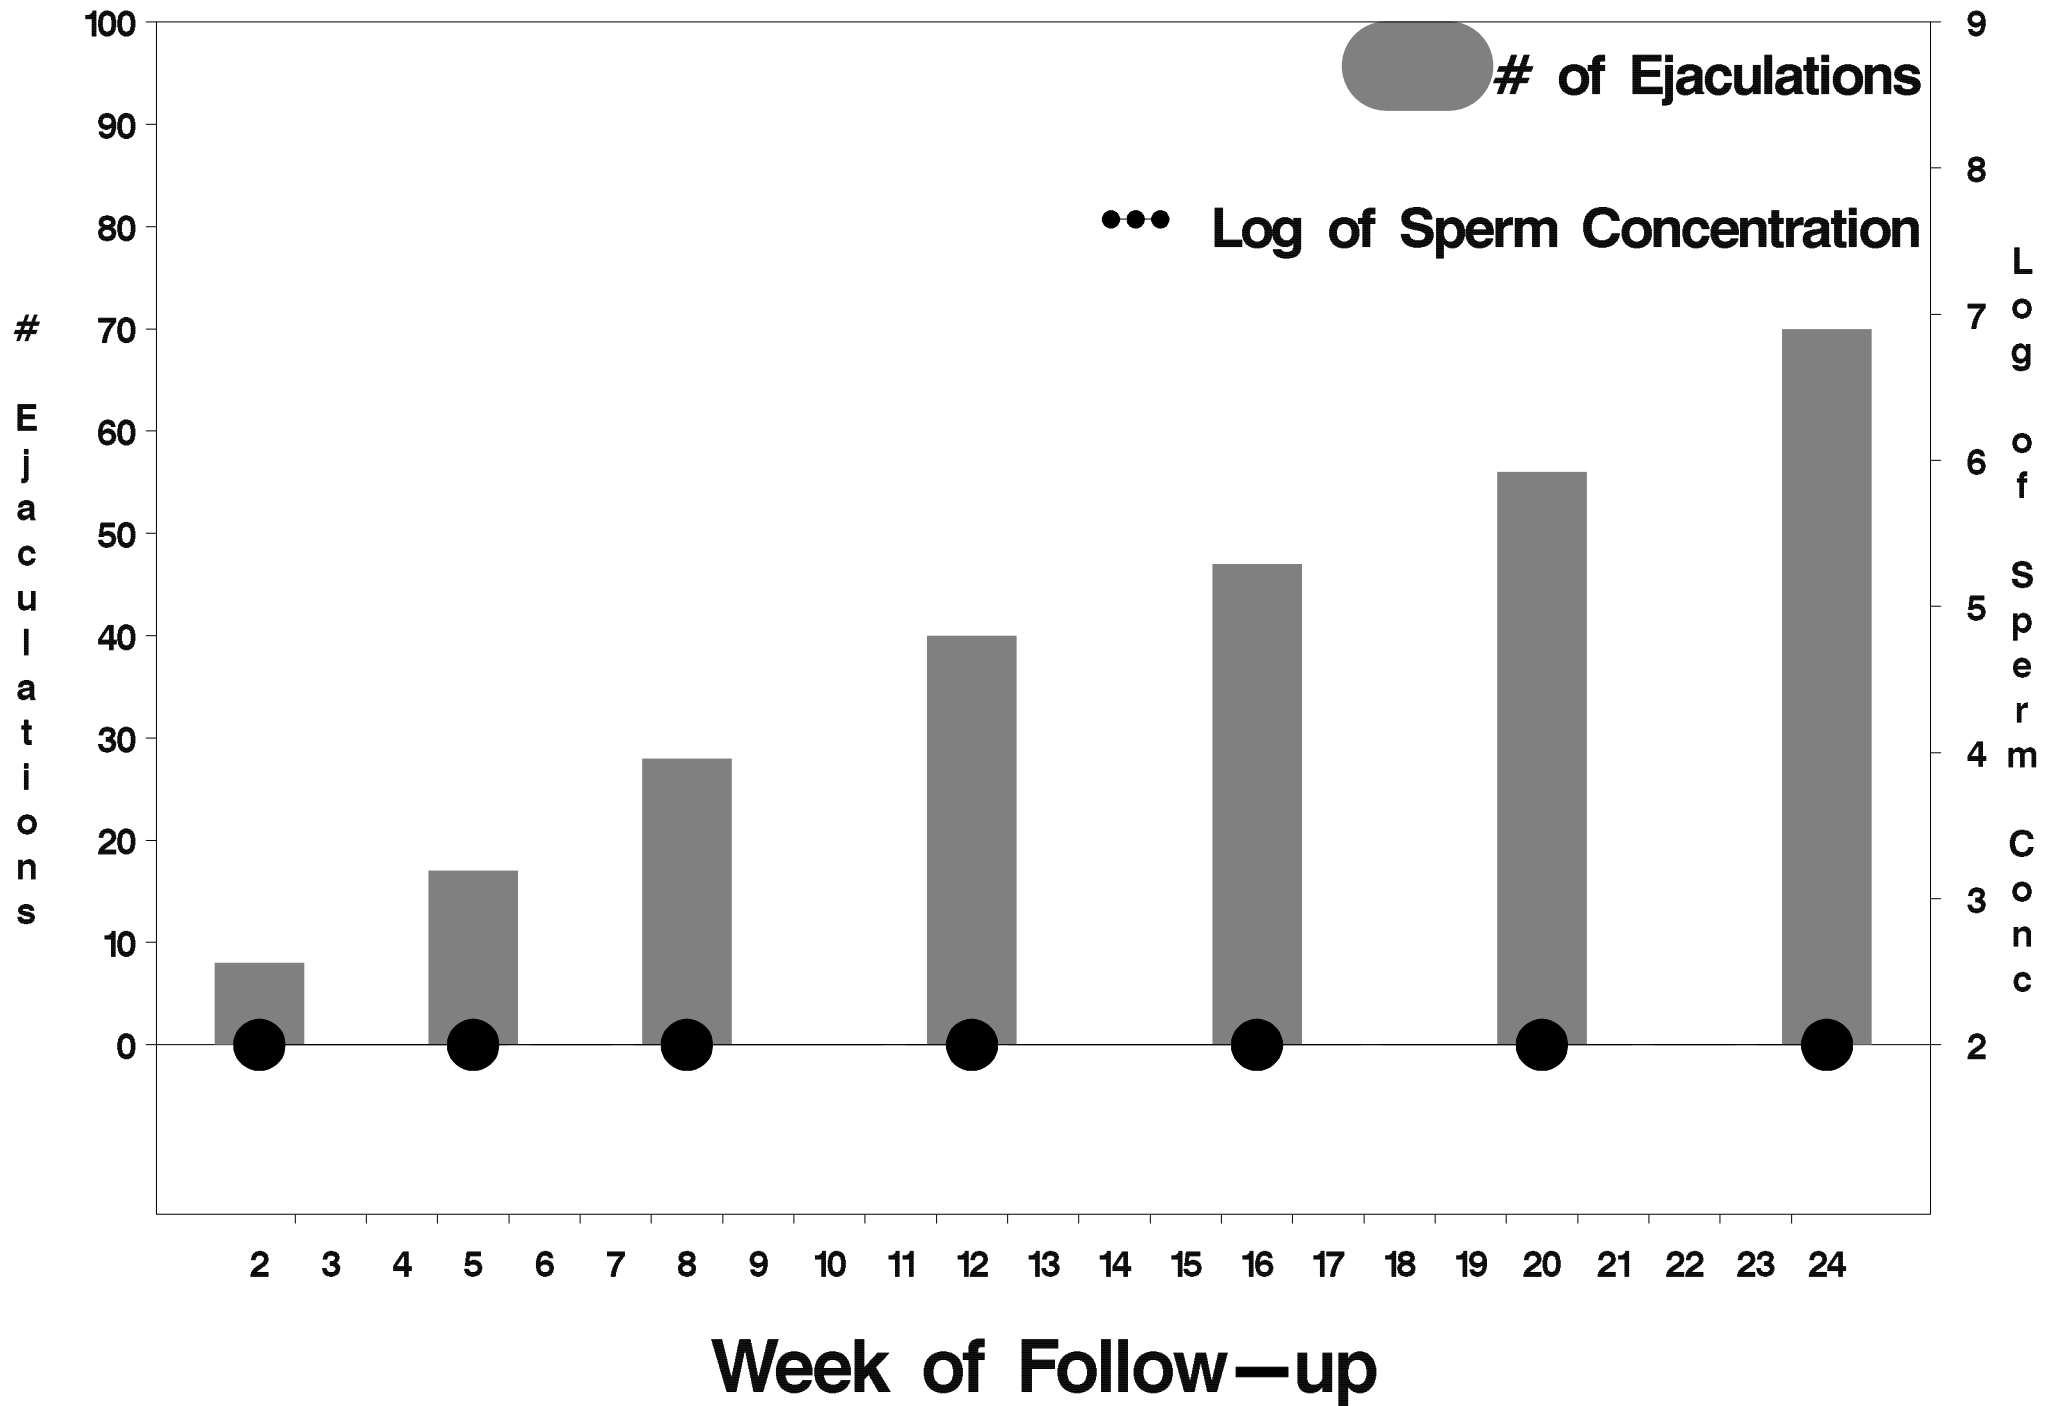

# Participant number= 789

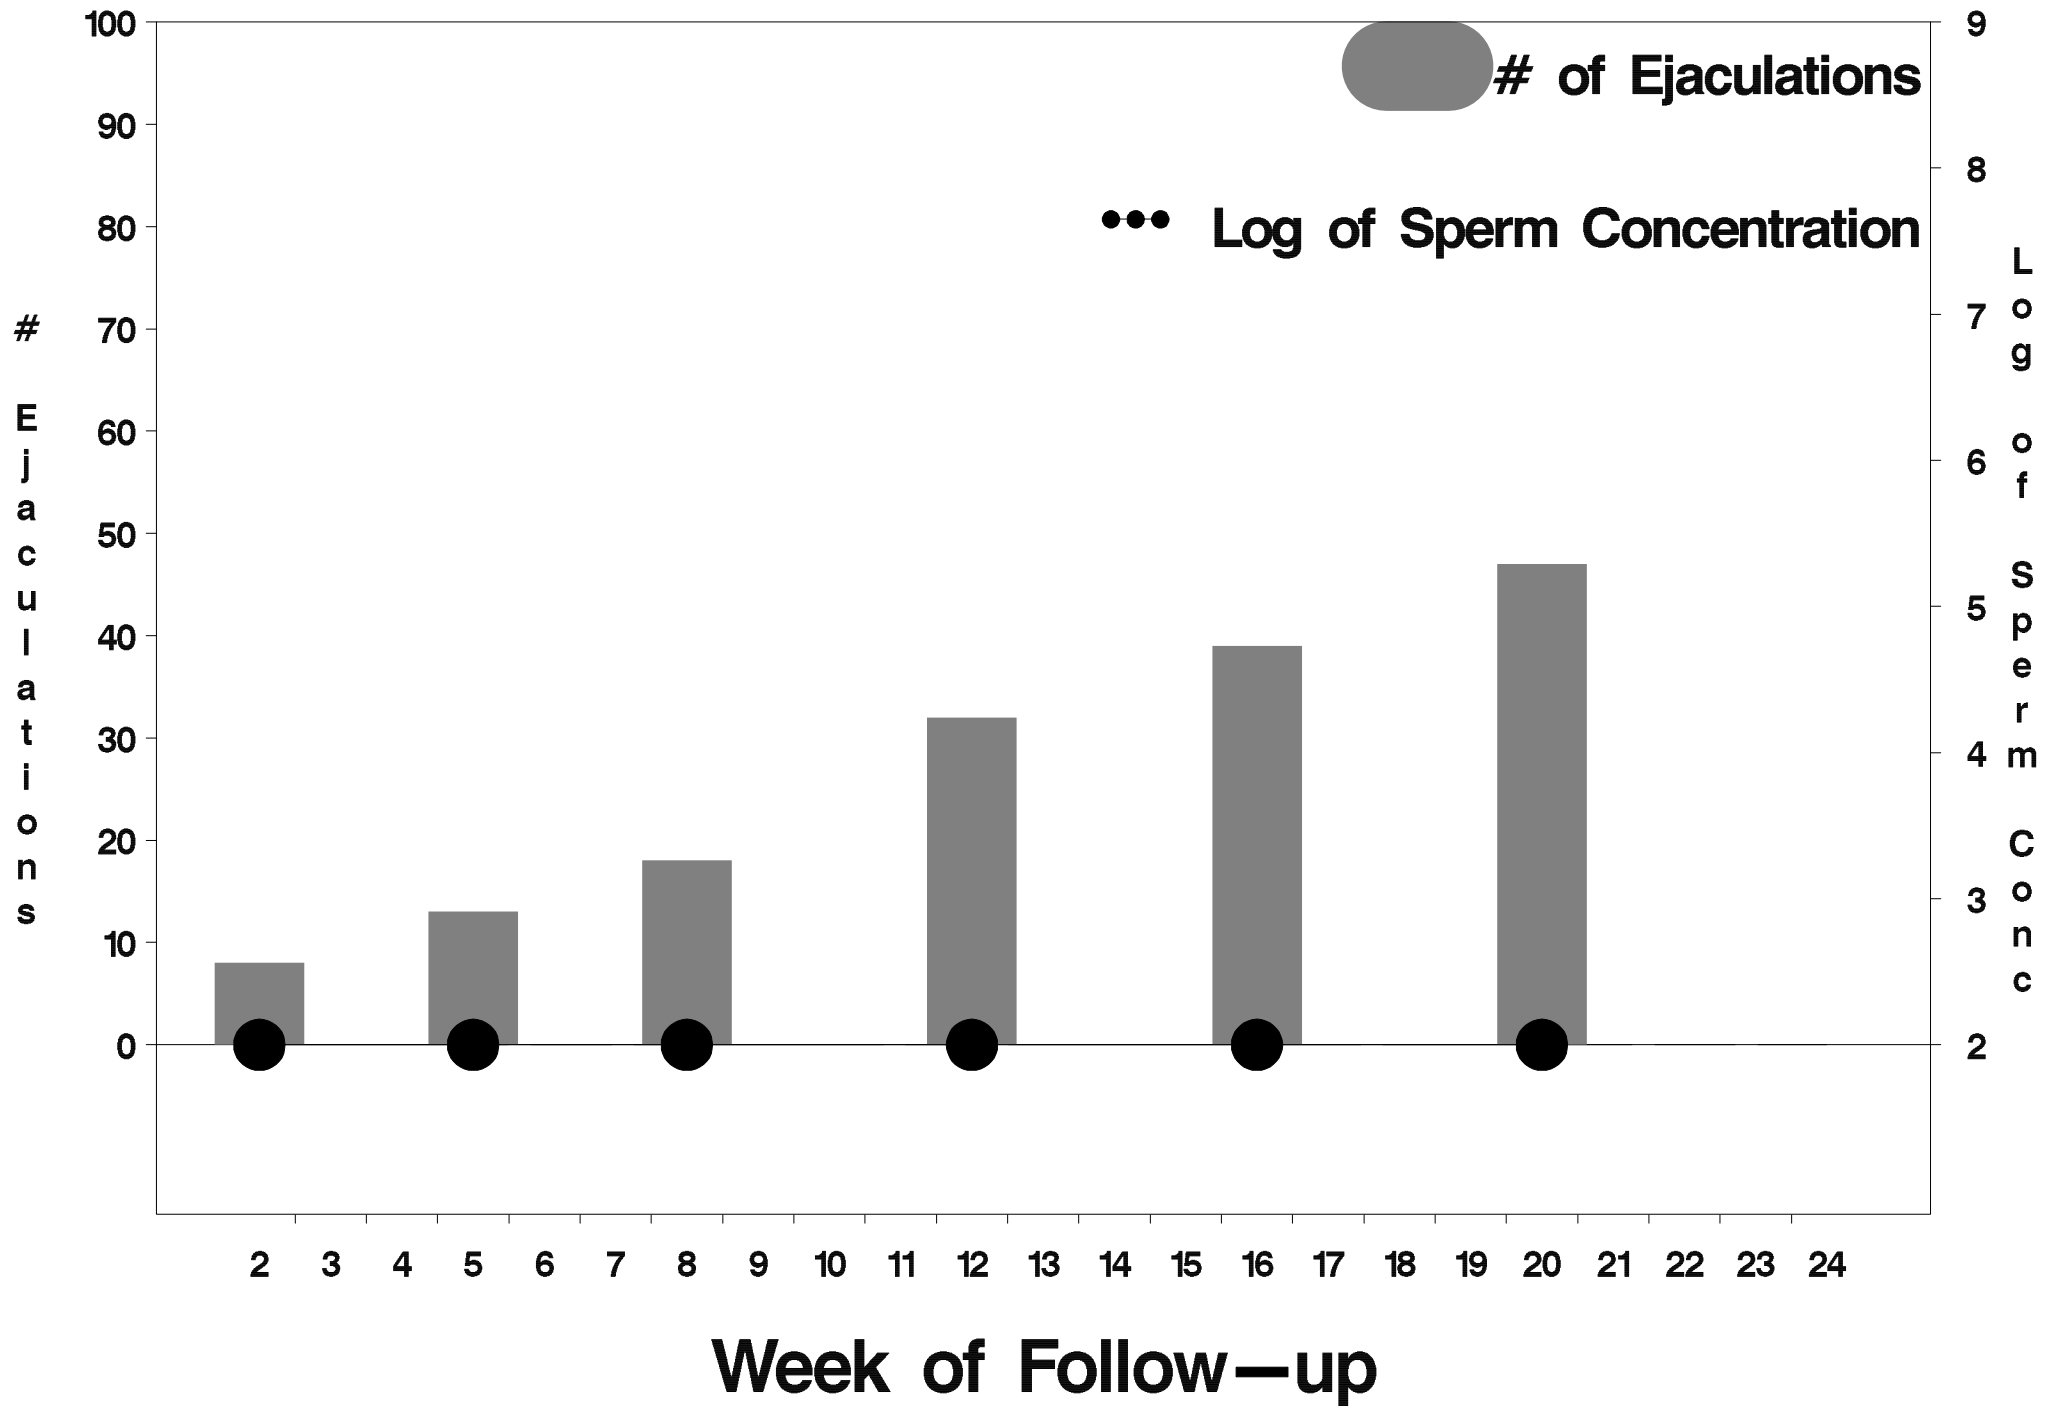

# Participant number= 790

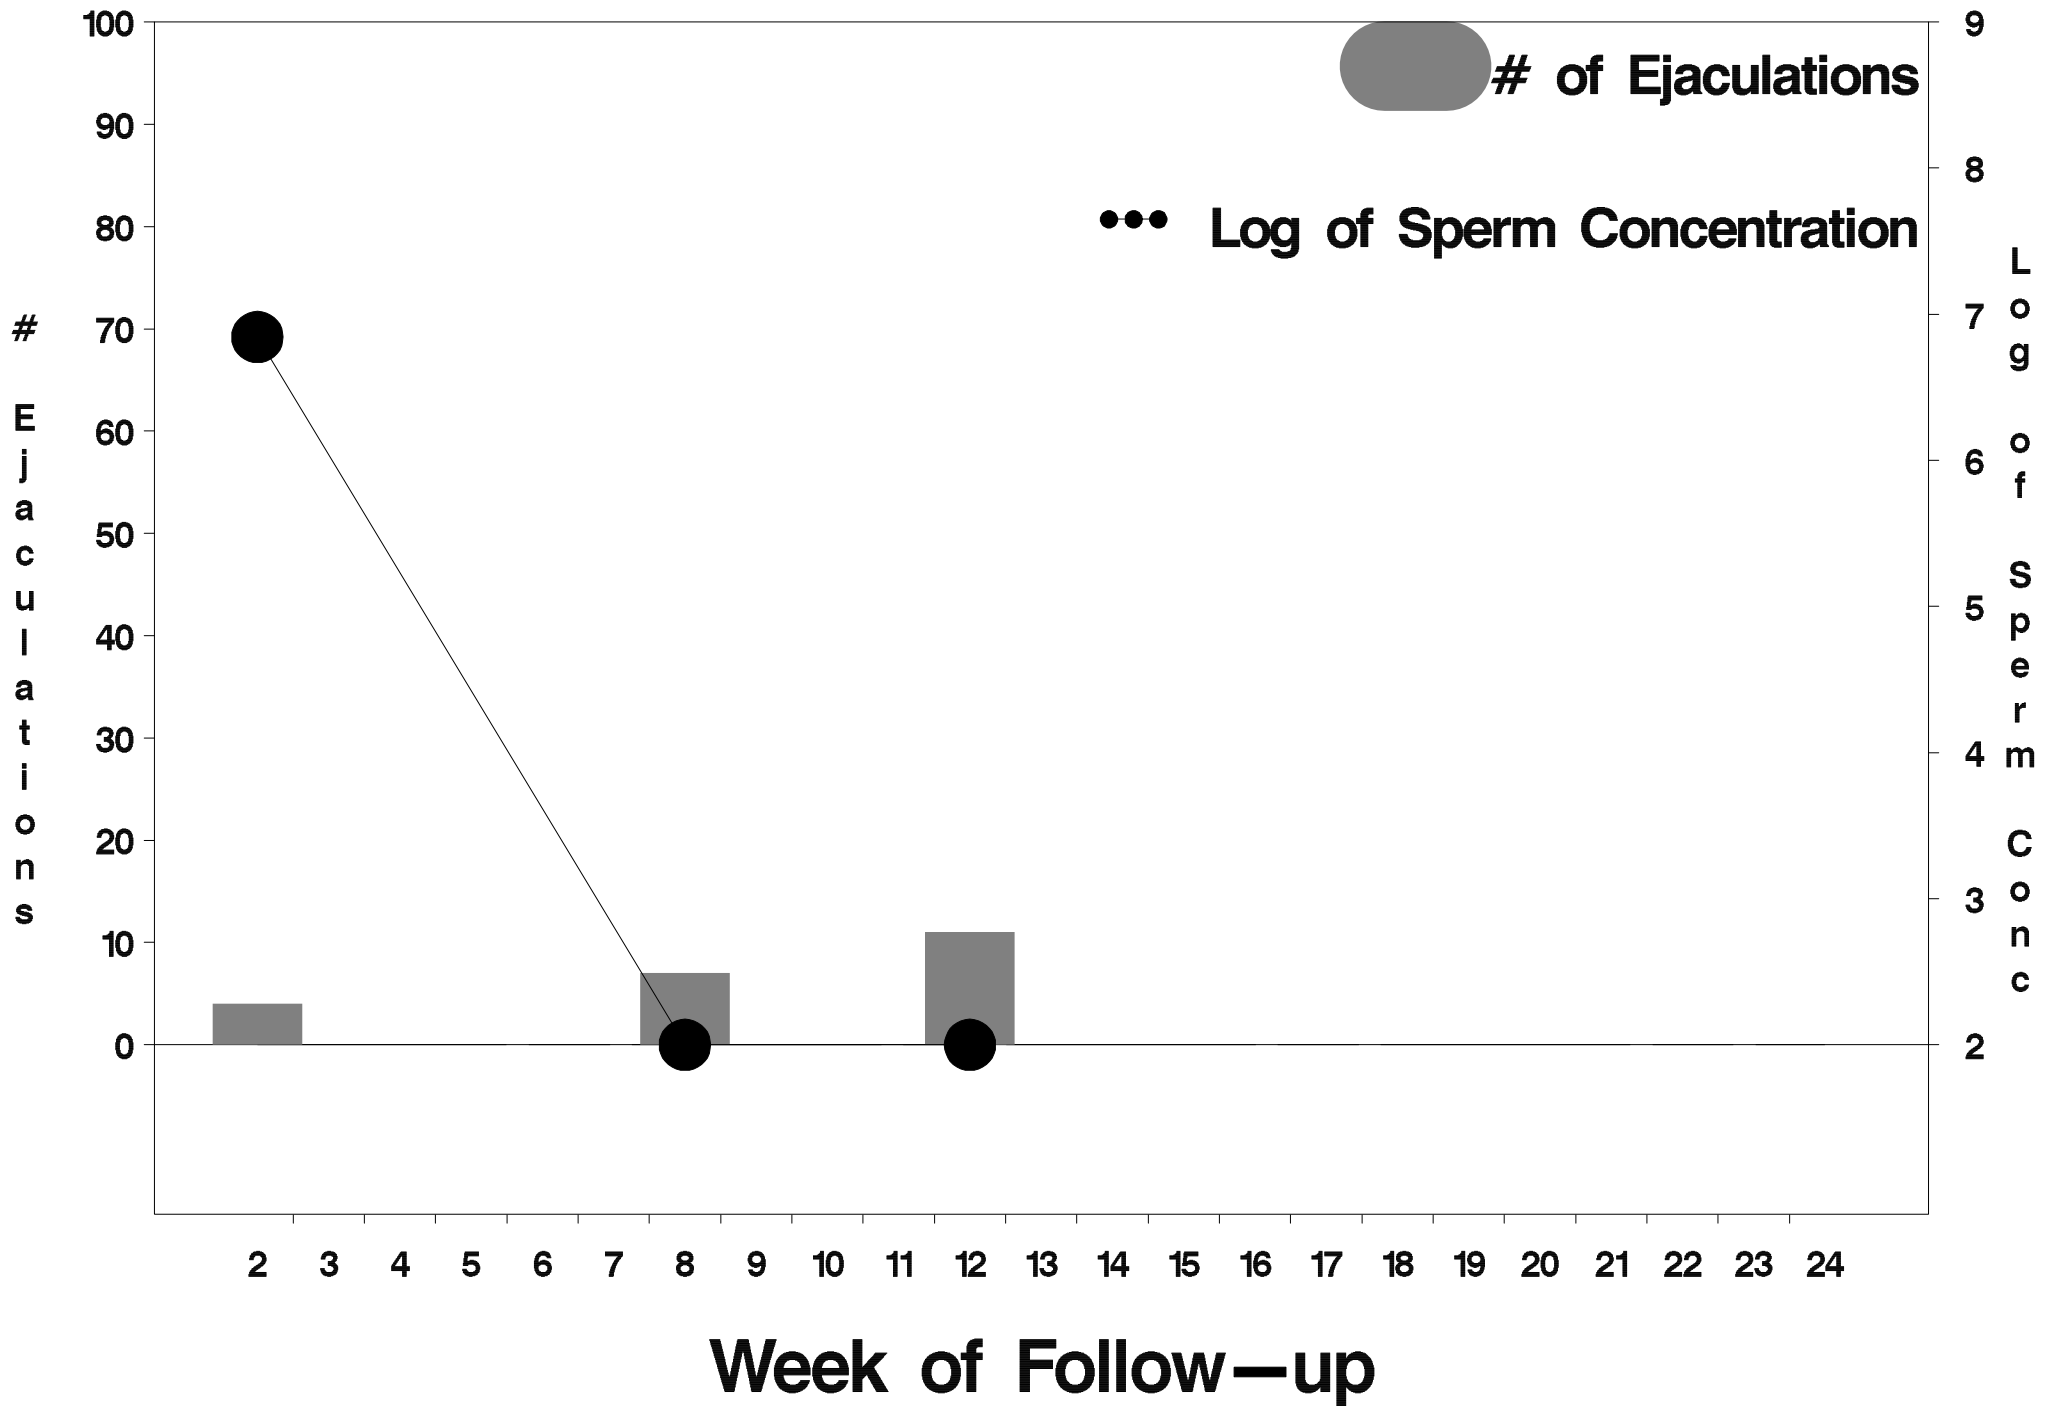

# Participant number= 791

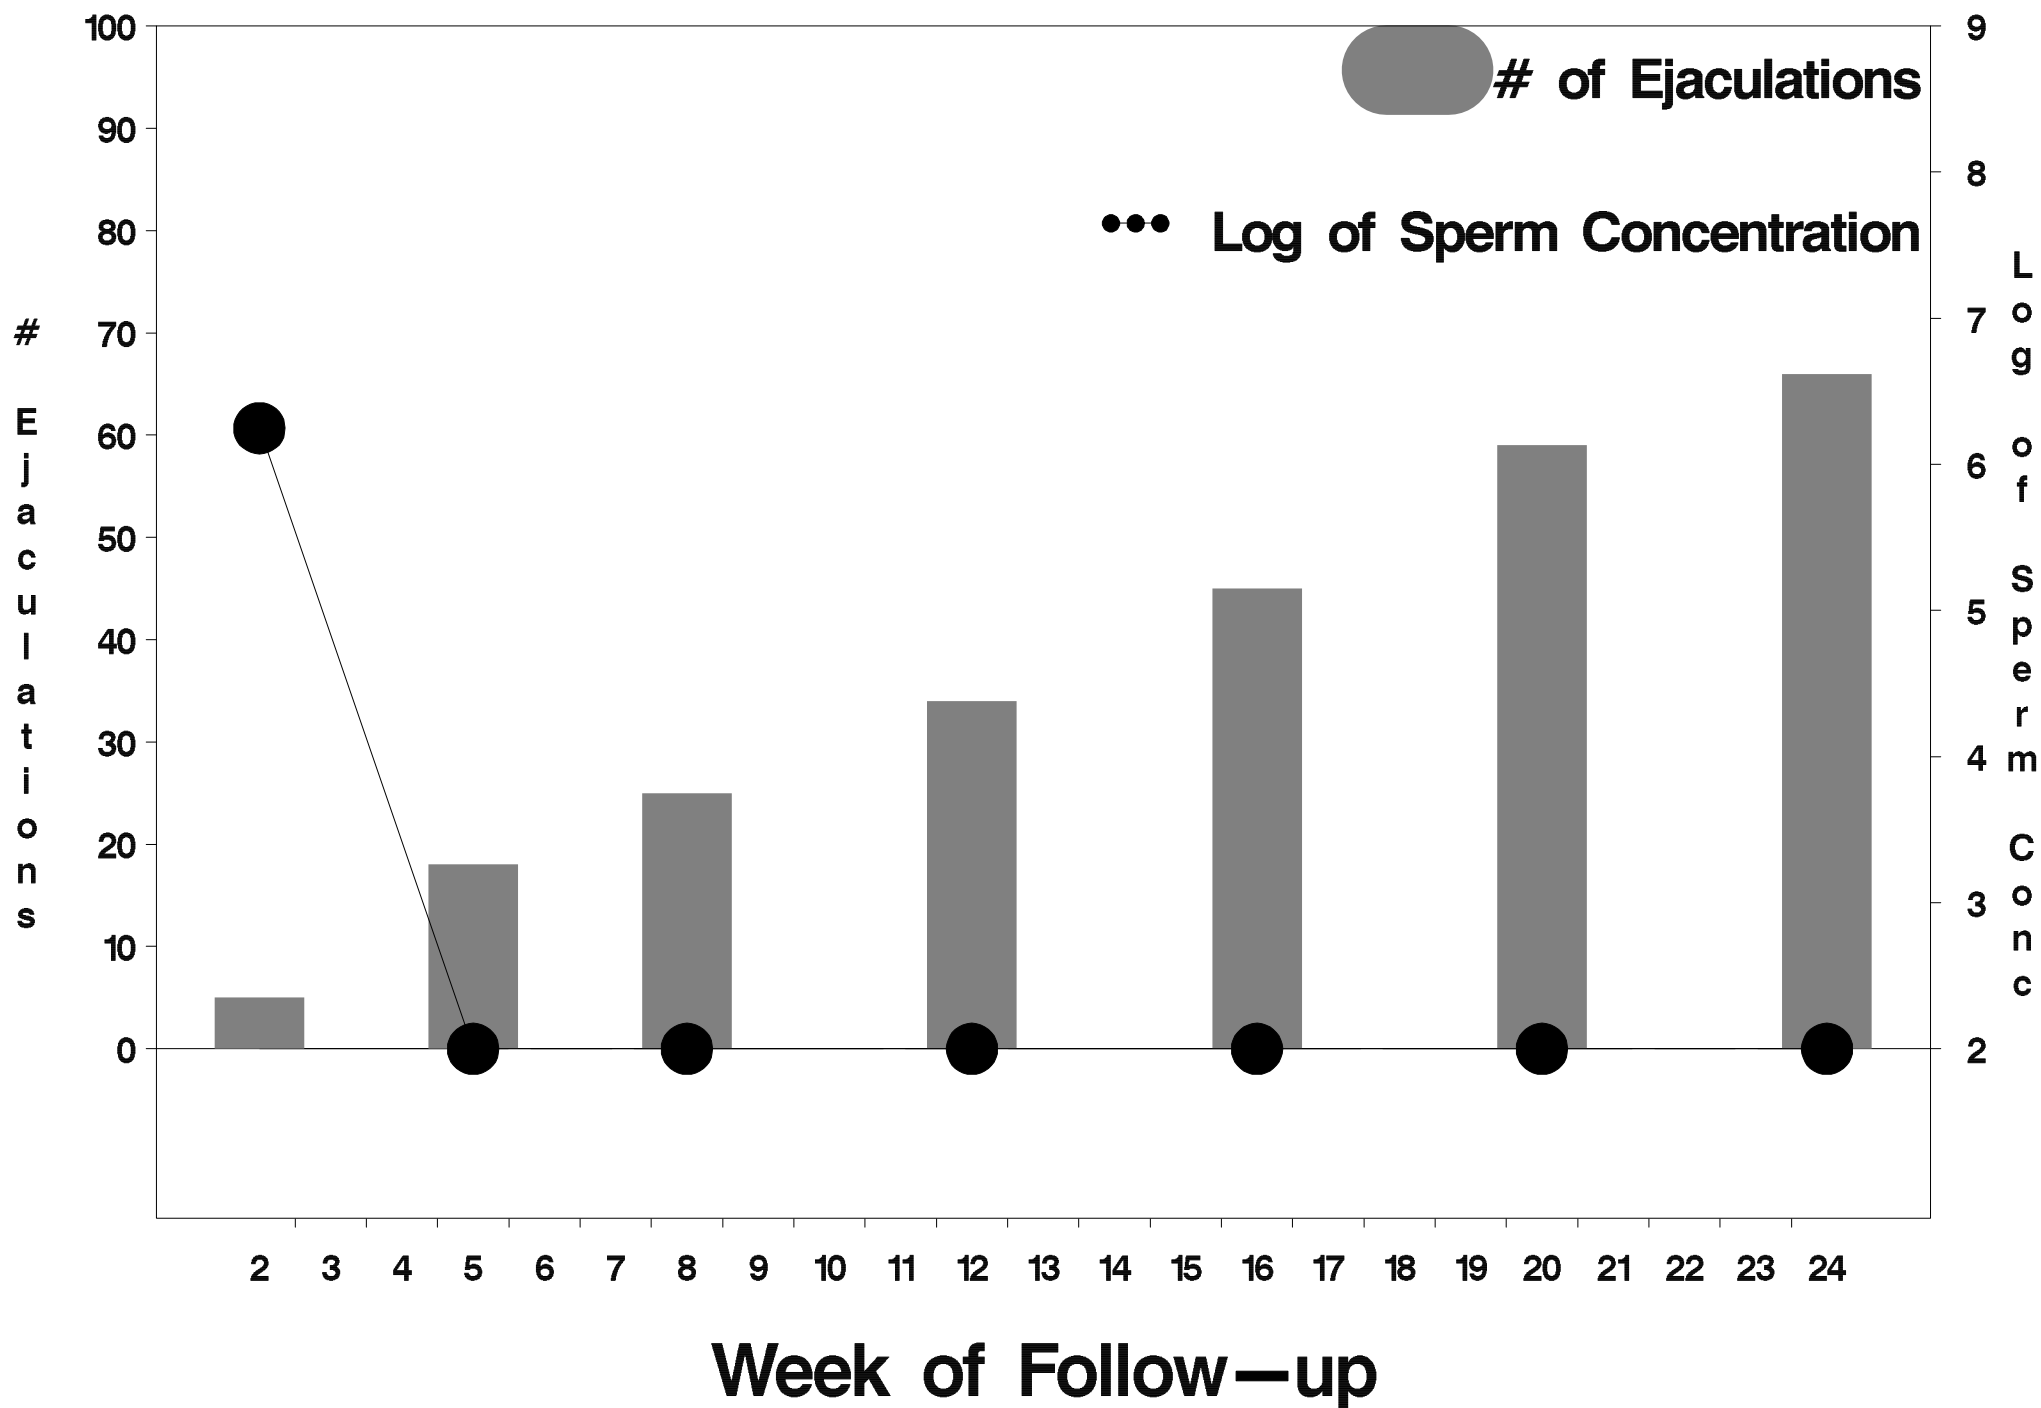

# Participant number= 792

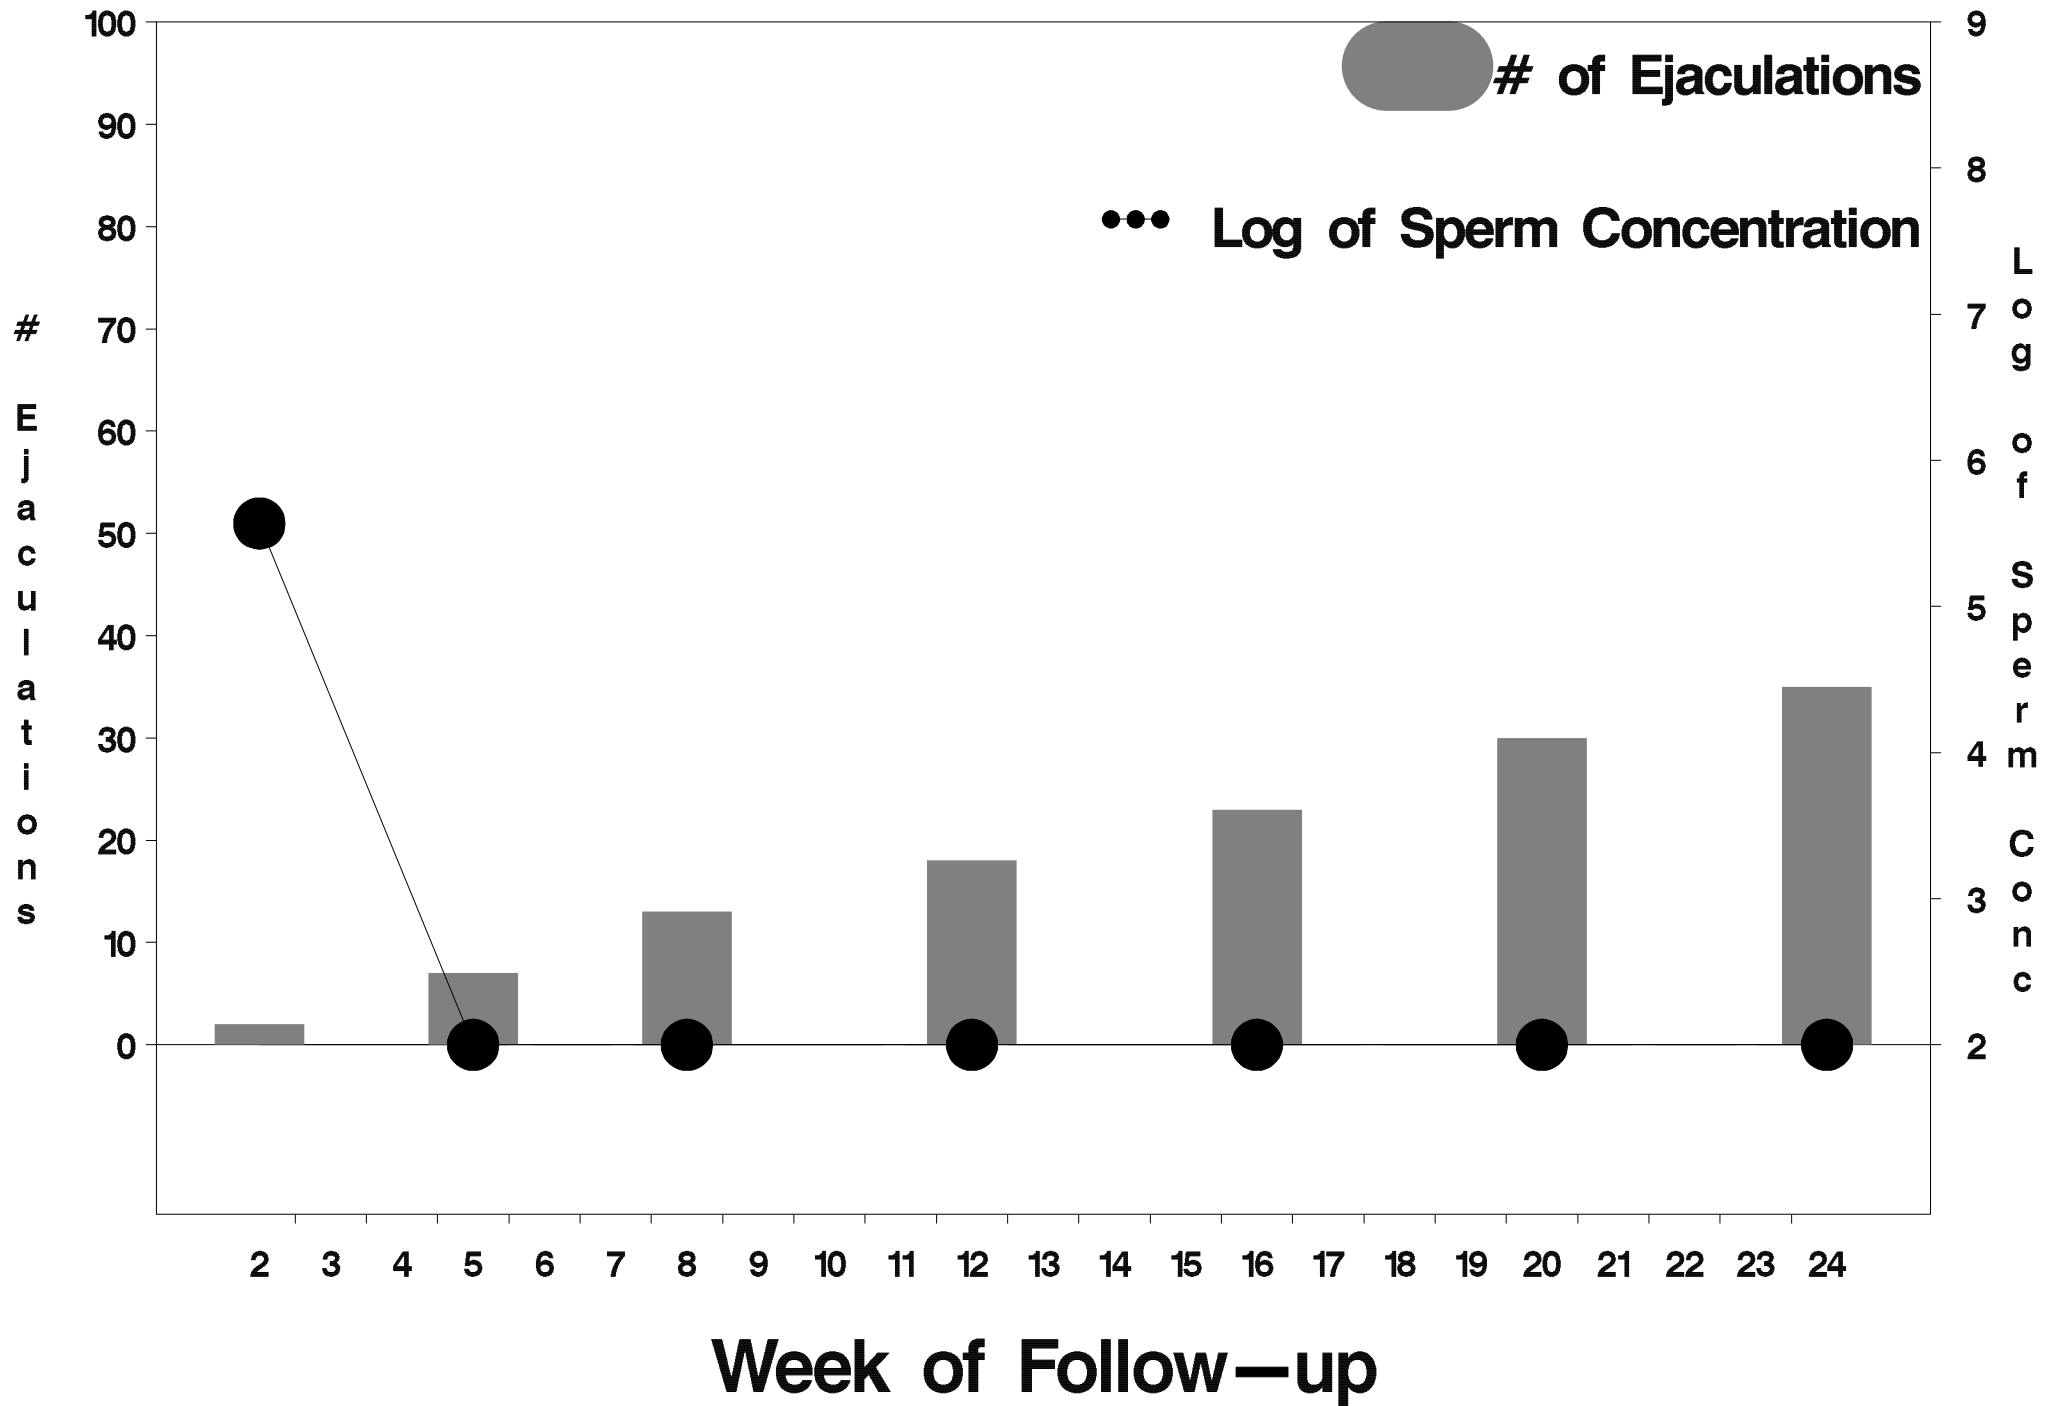

# Participant number= 793

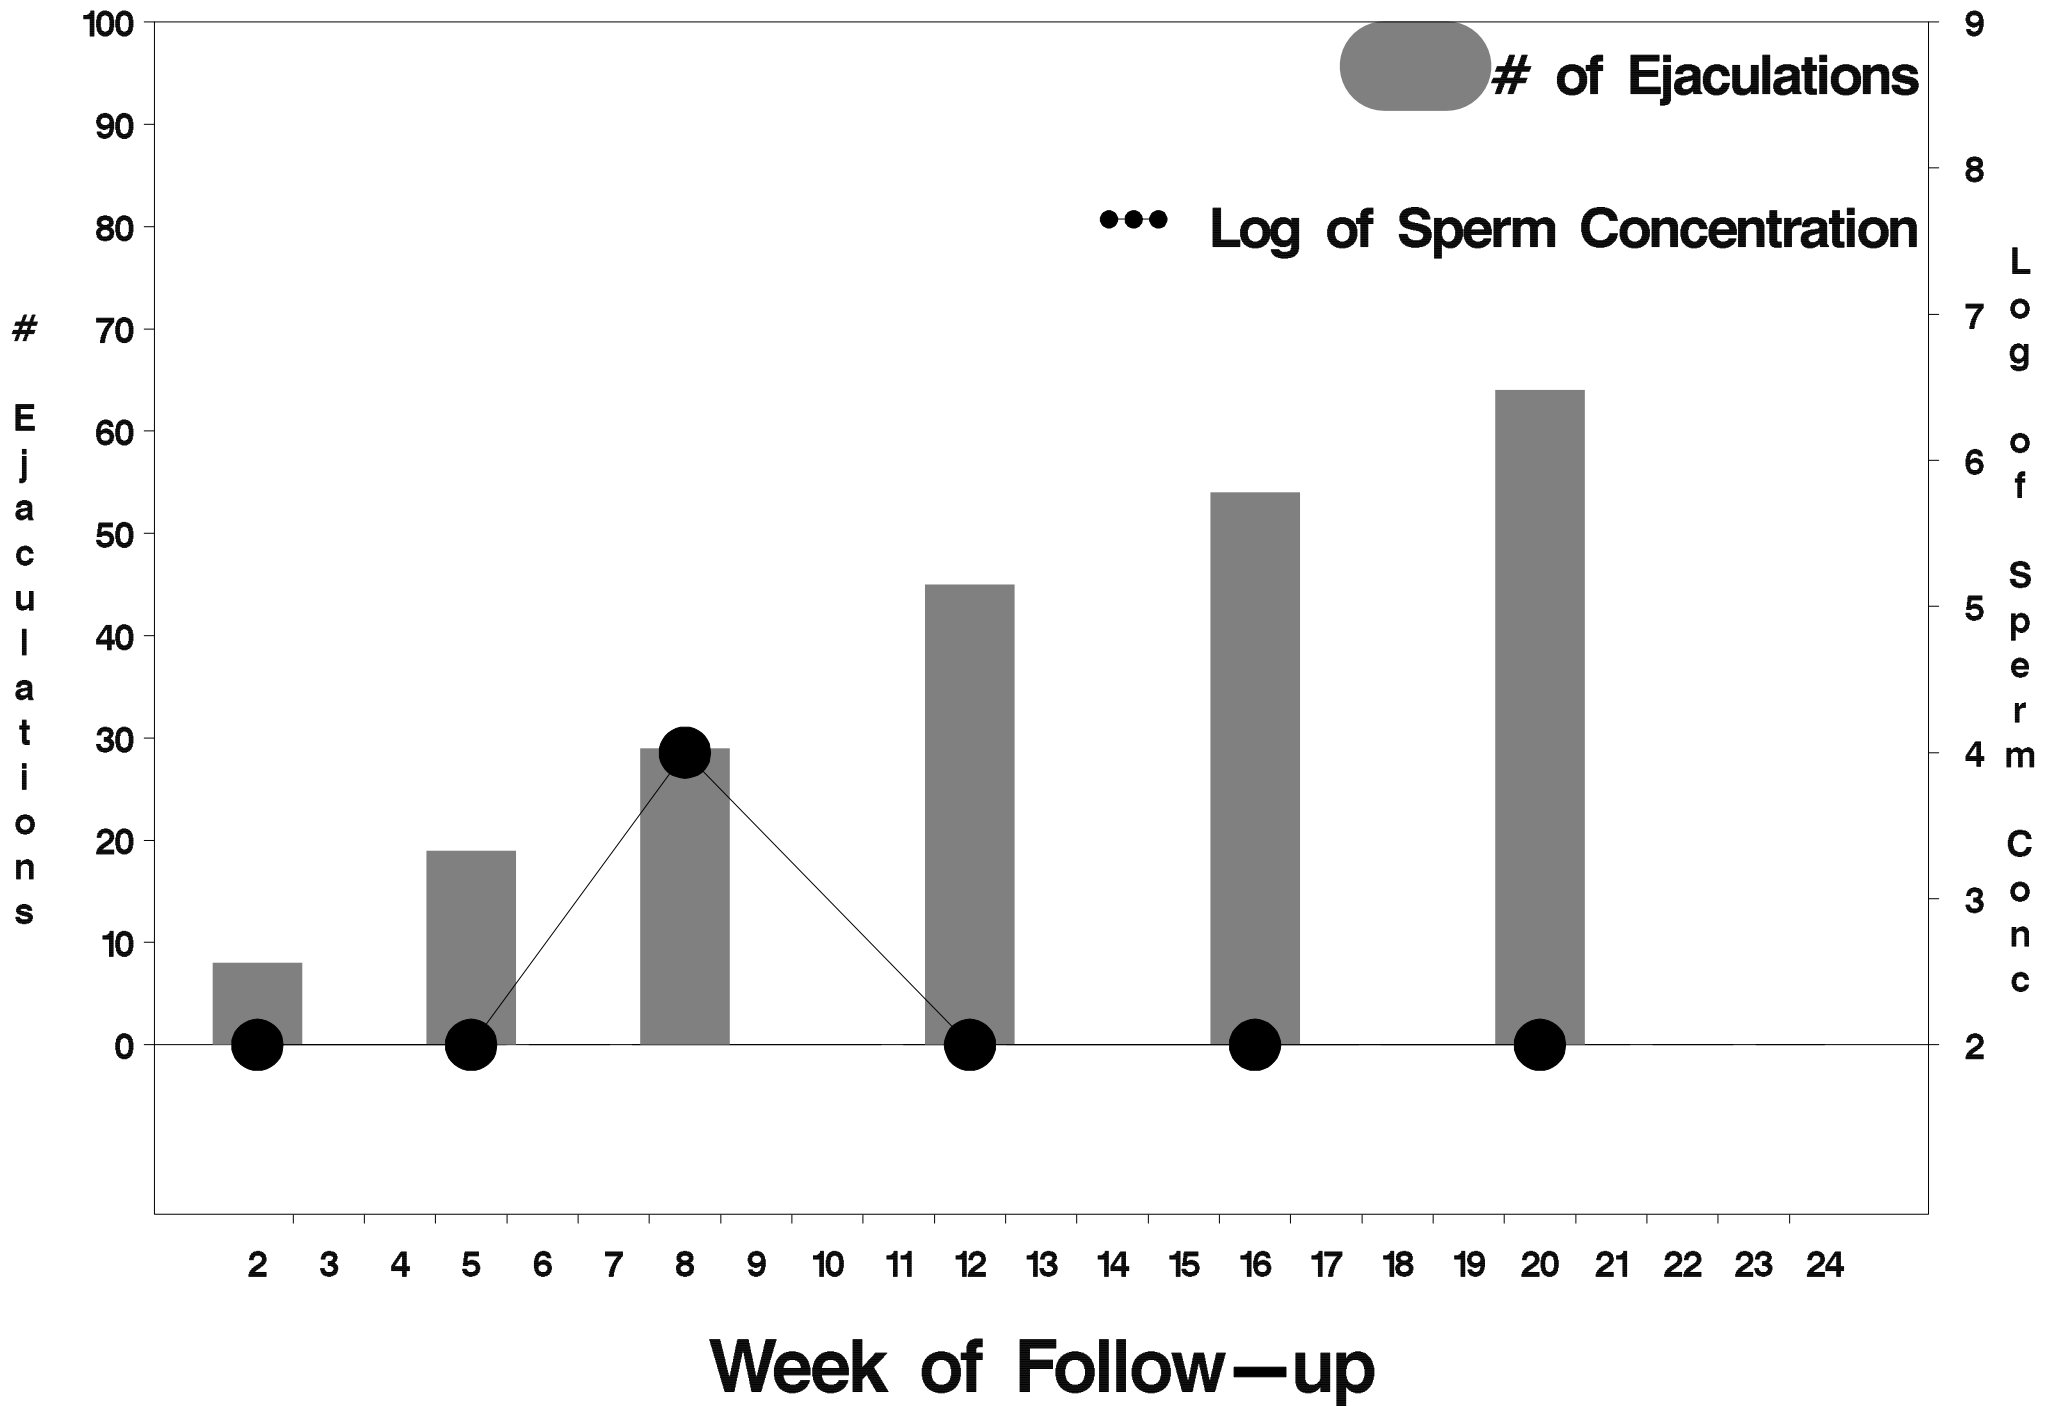

# Participant number= 794

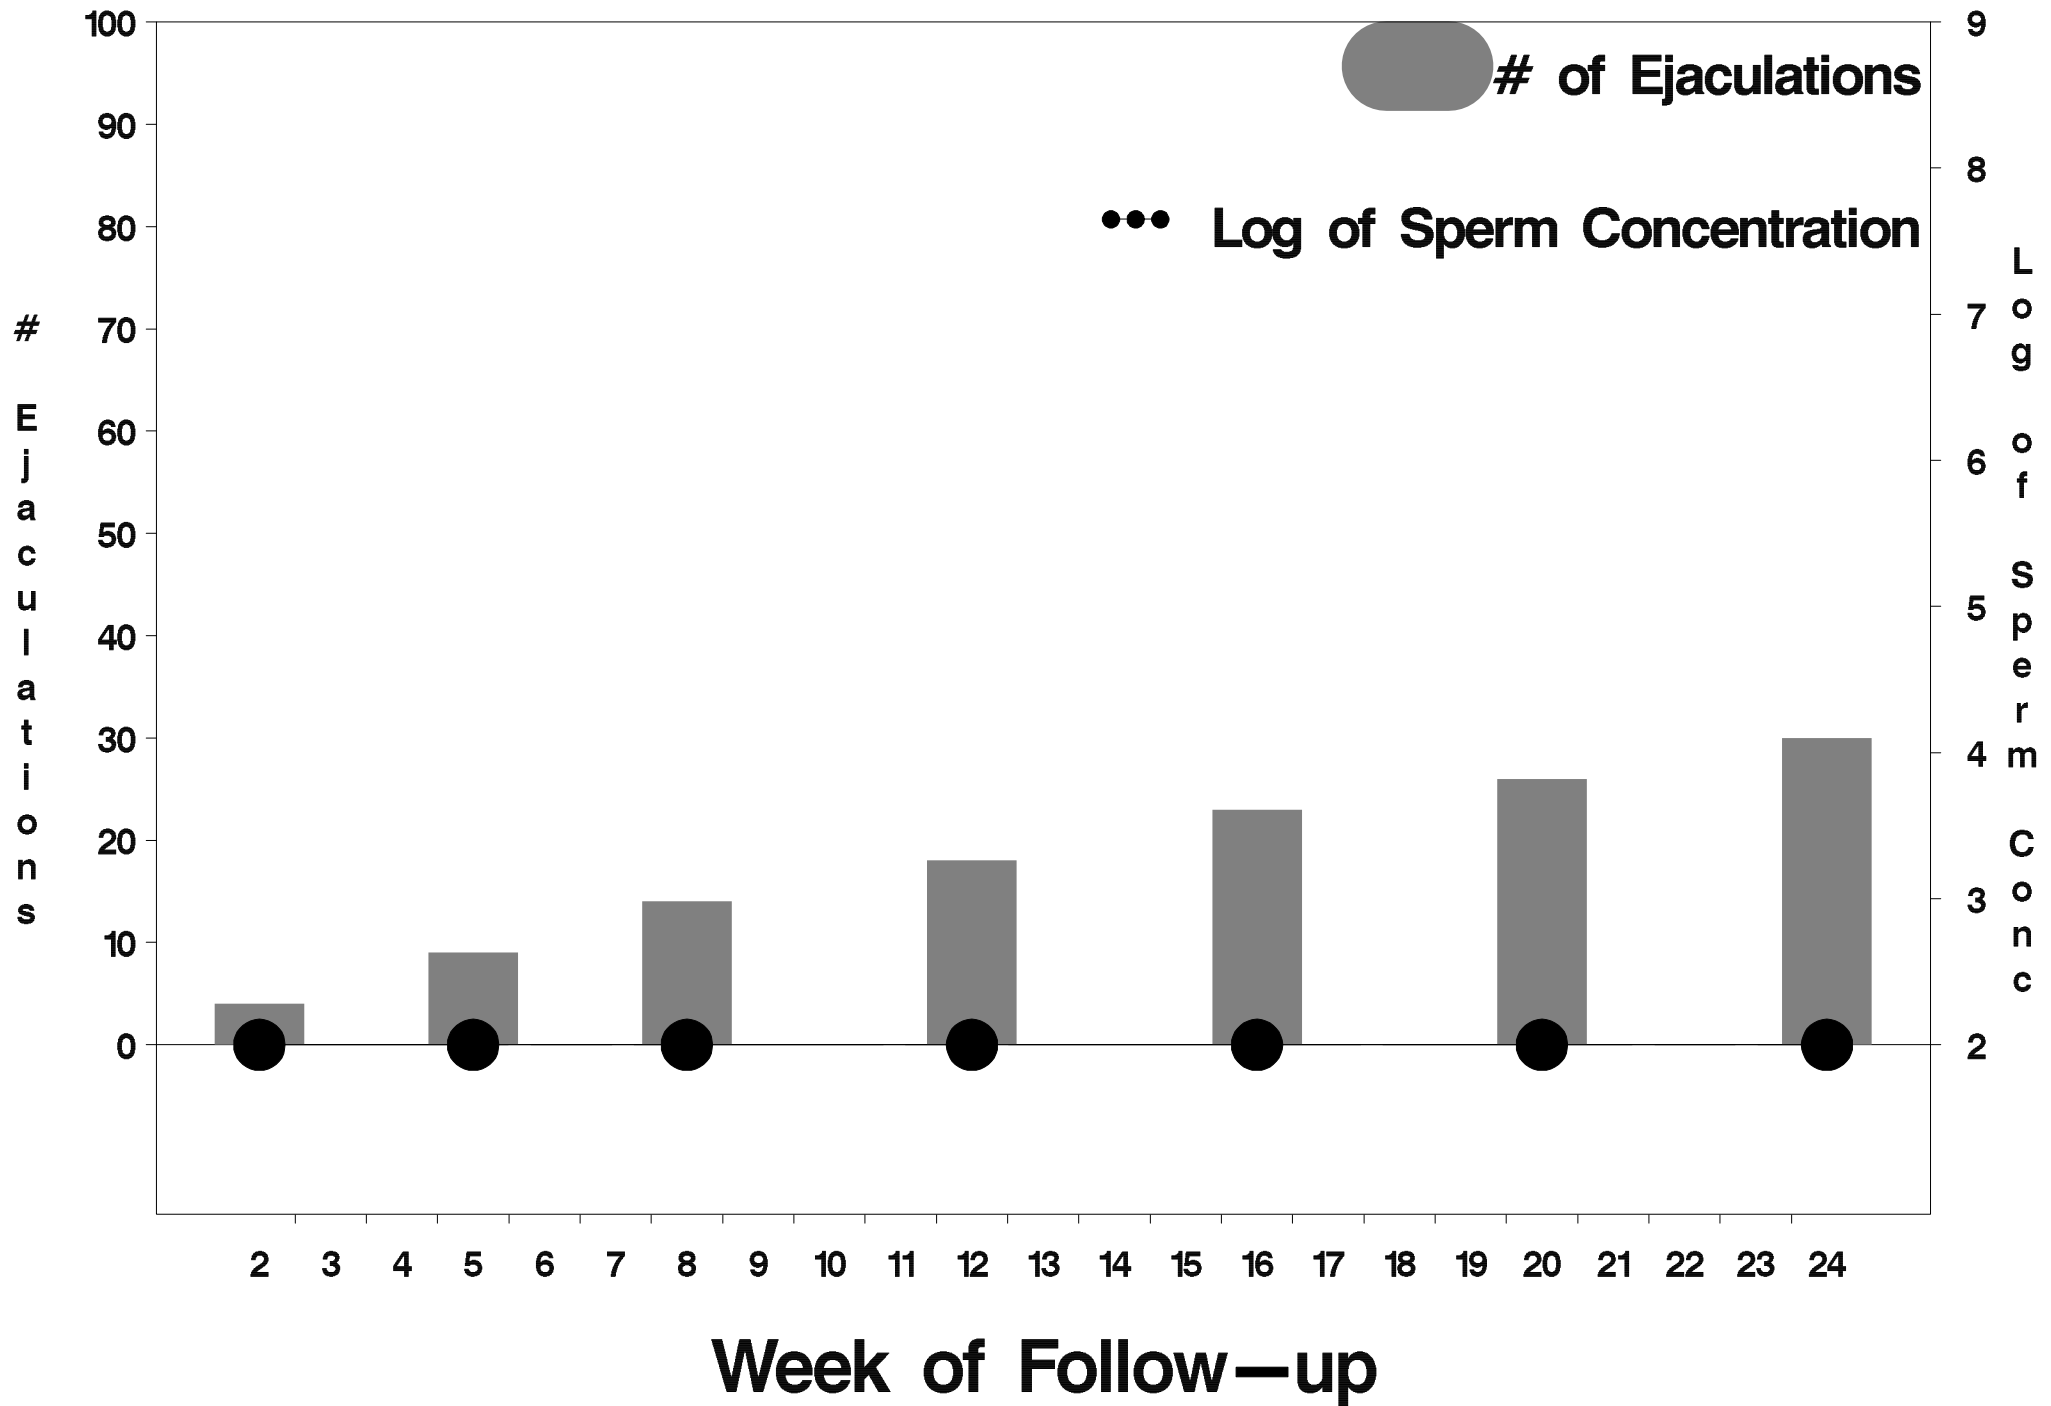

# Participant number= 795

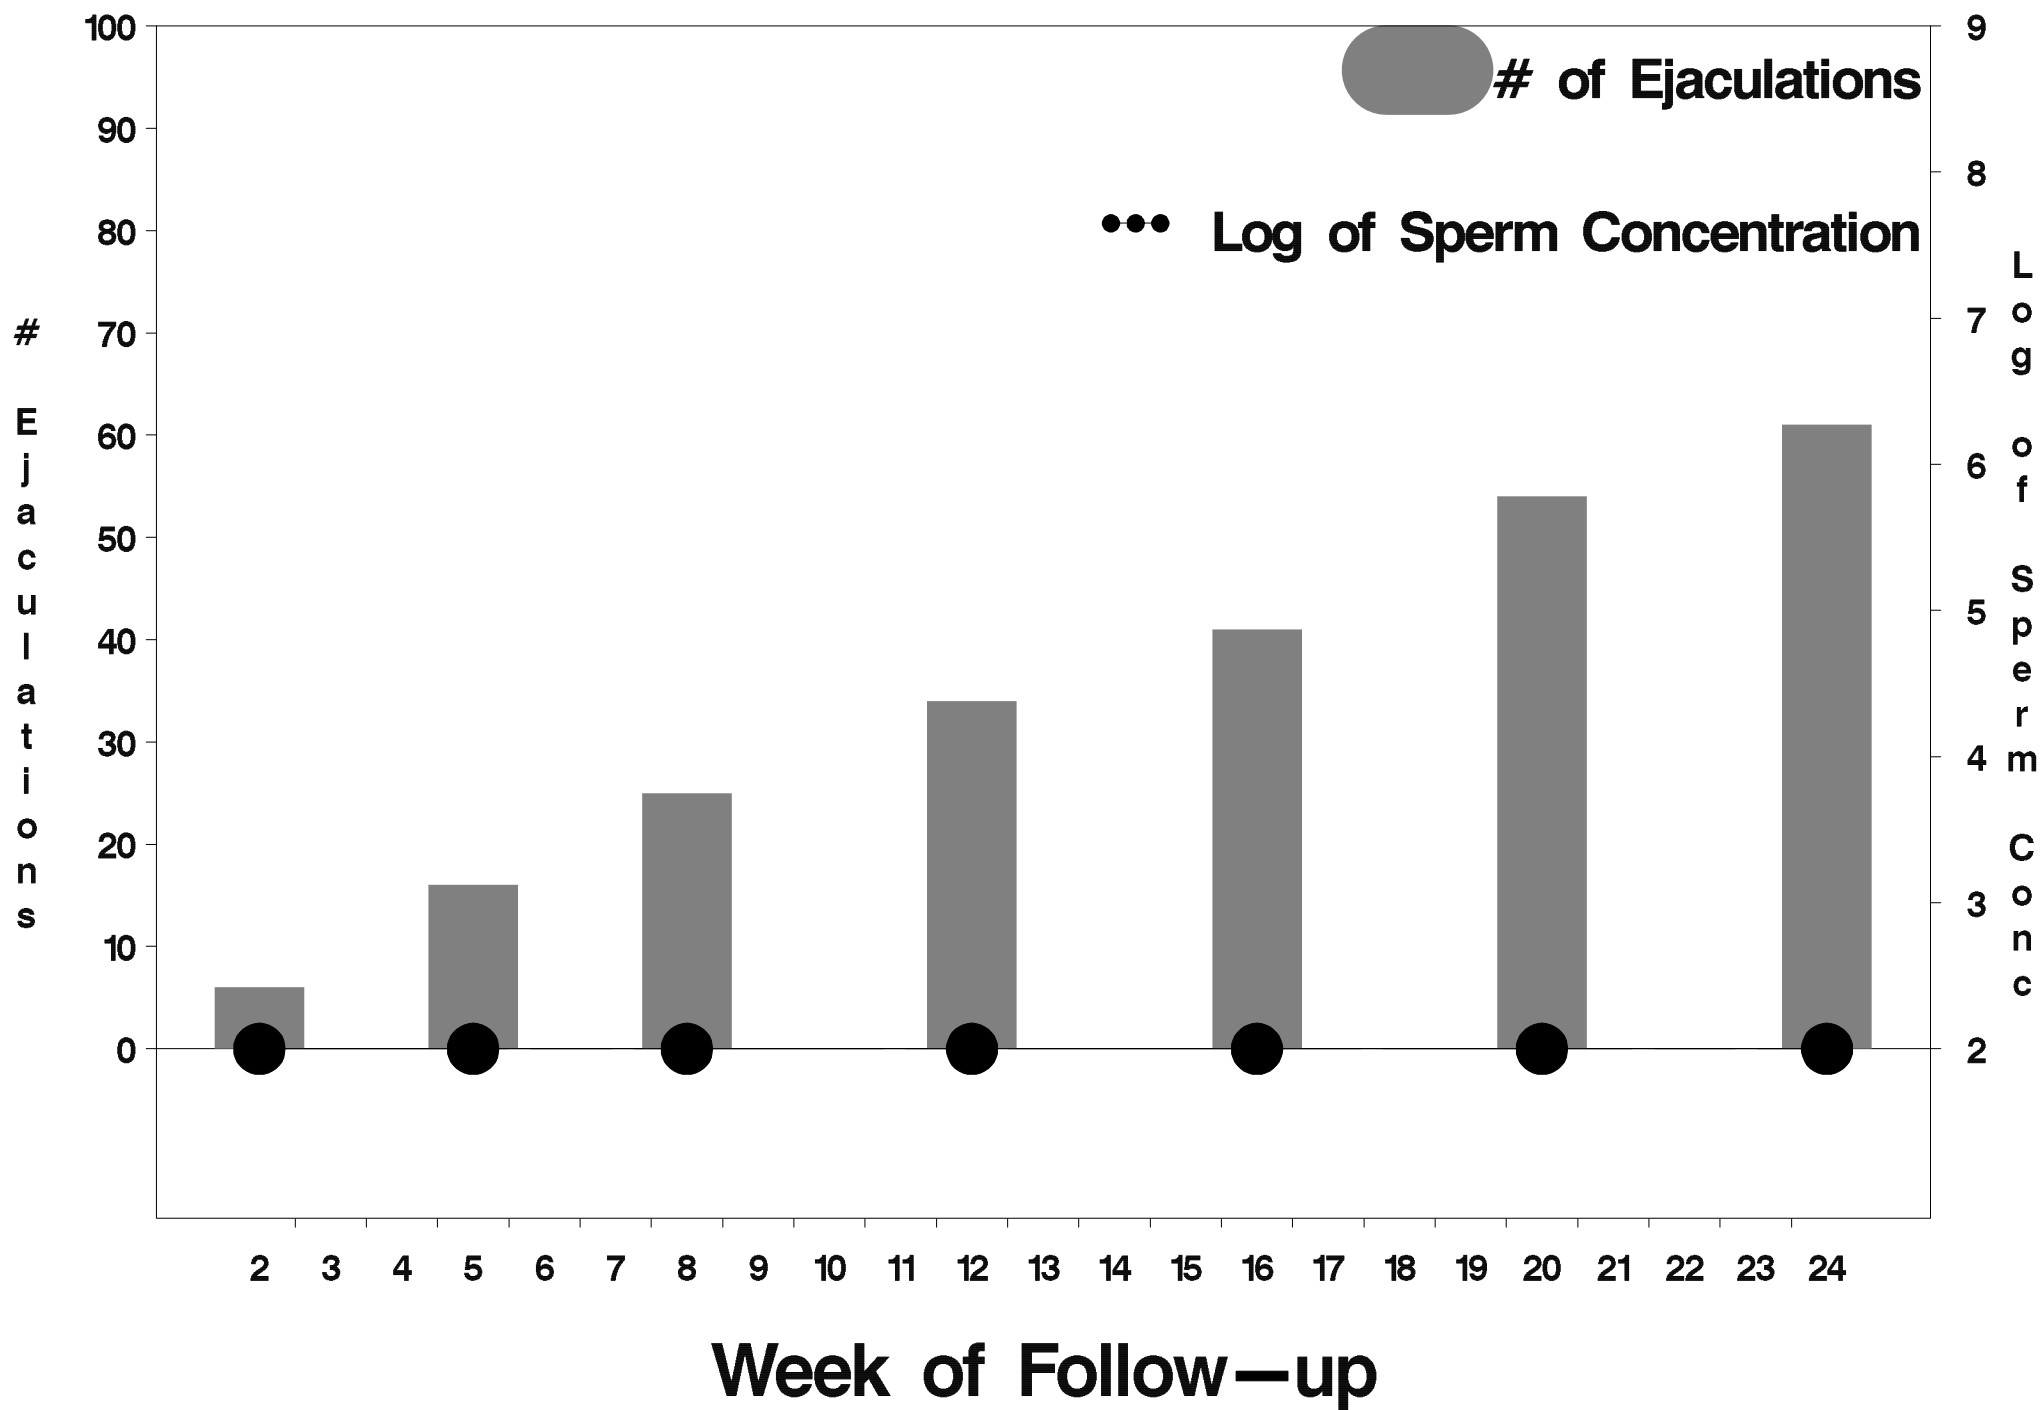



# Participant number= 796

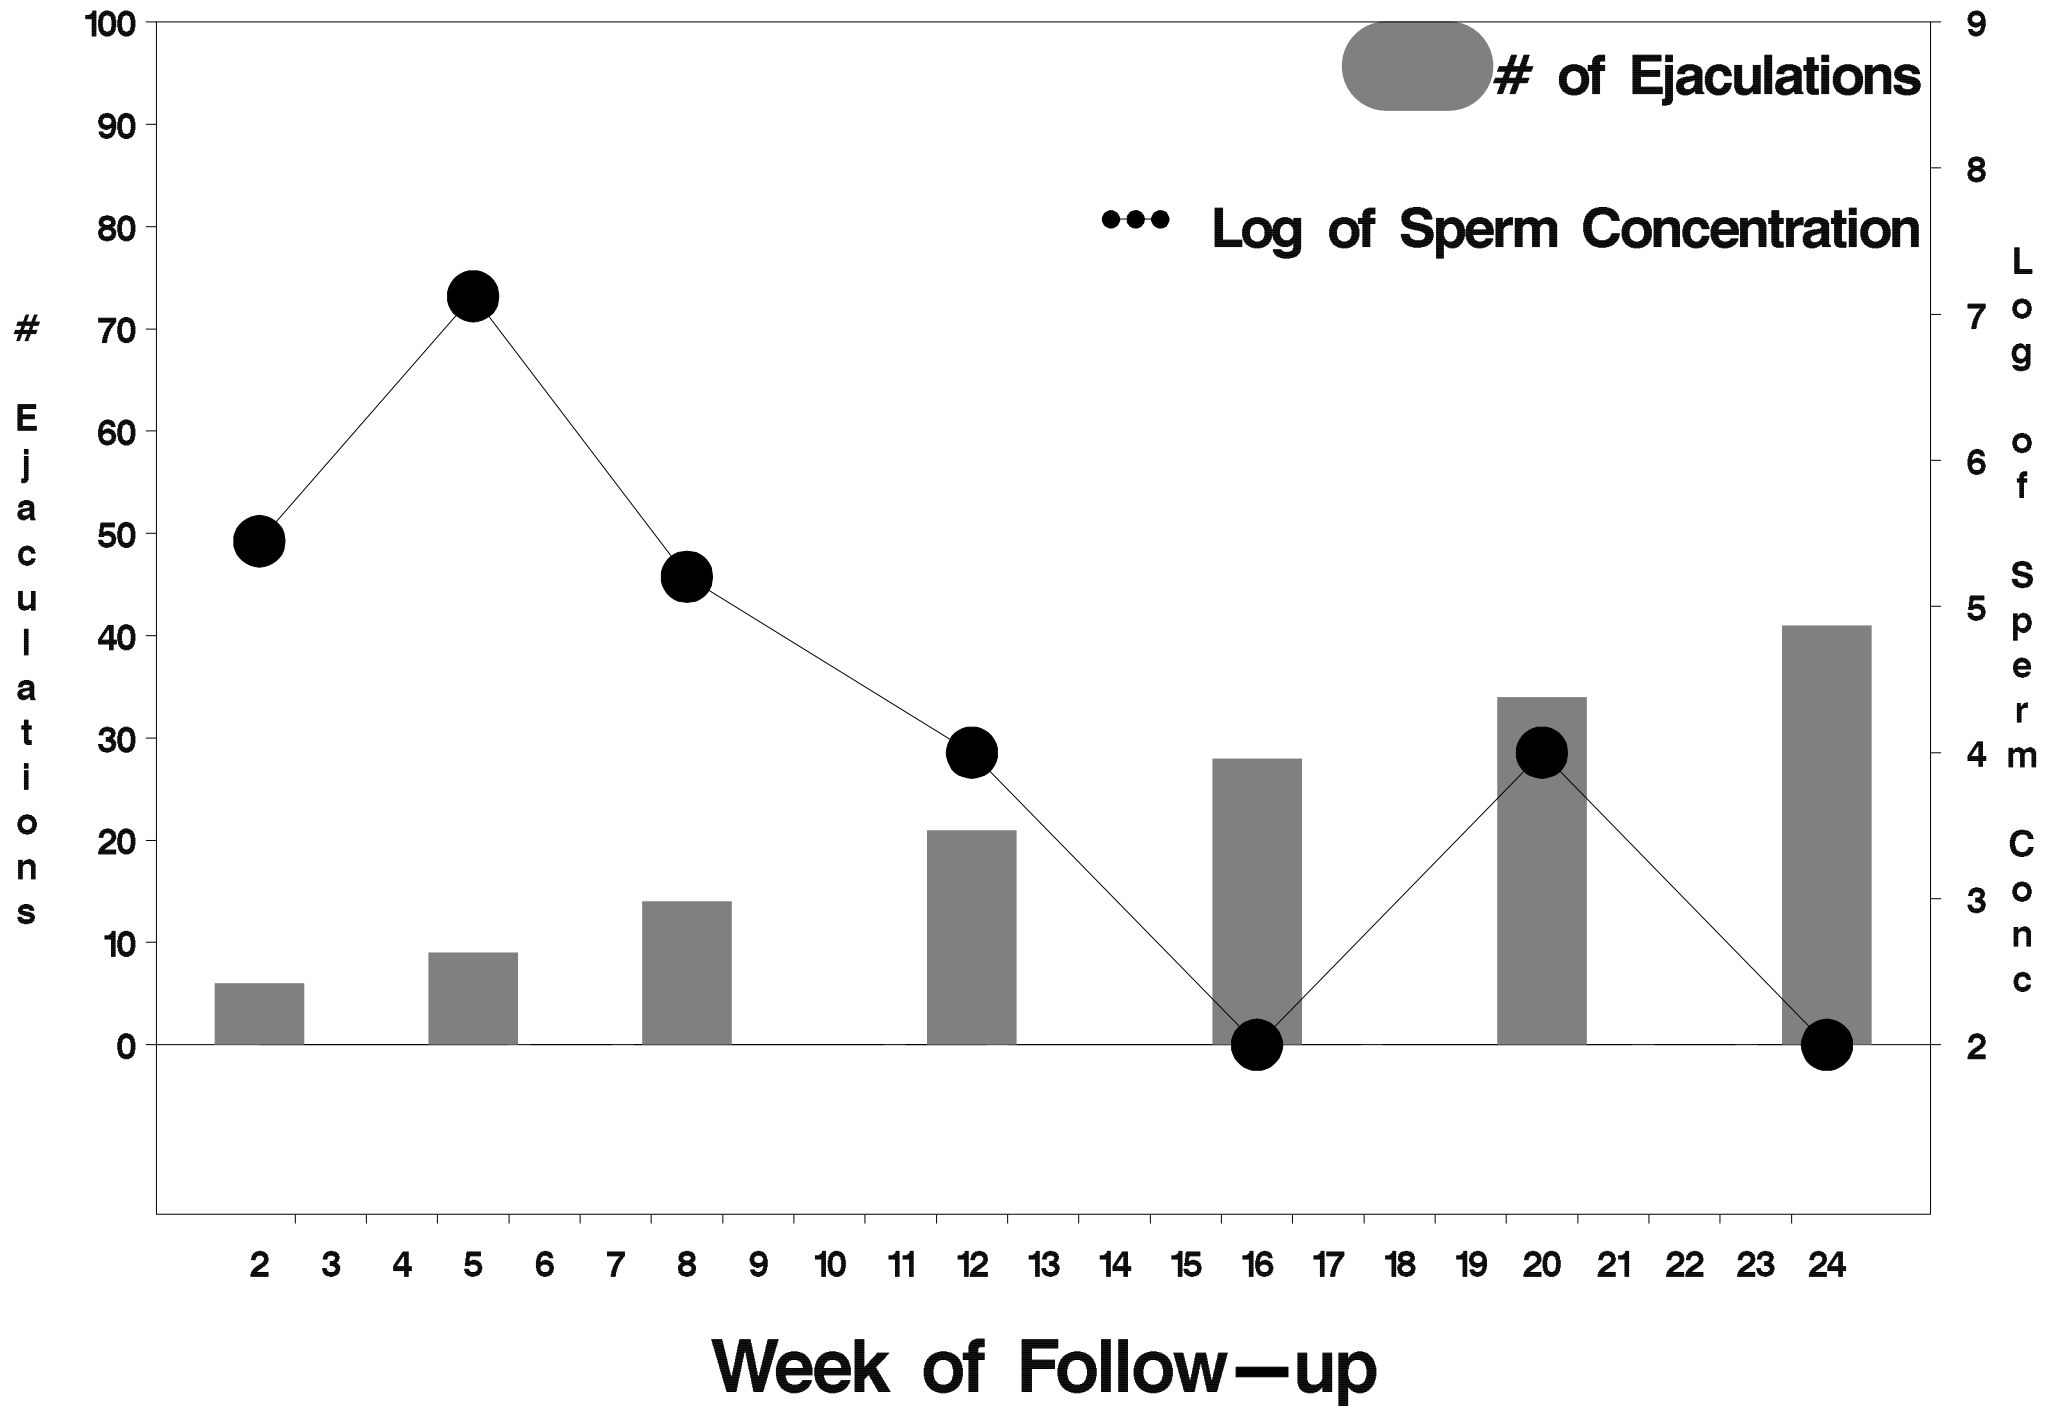

# Participant number= 797

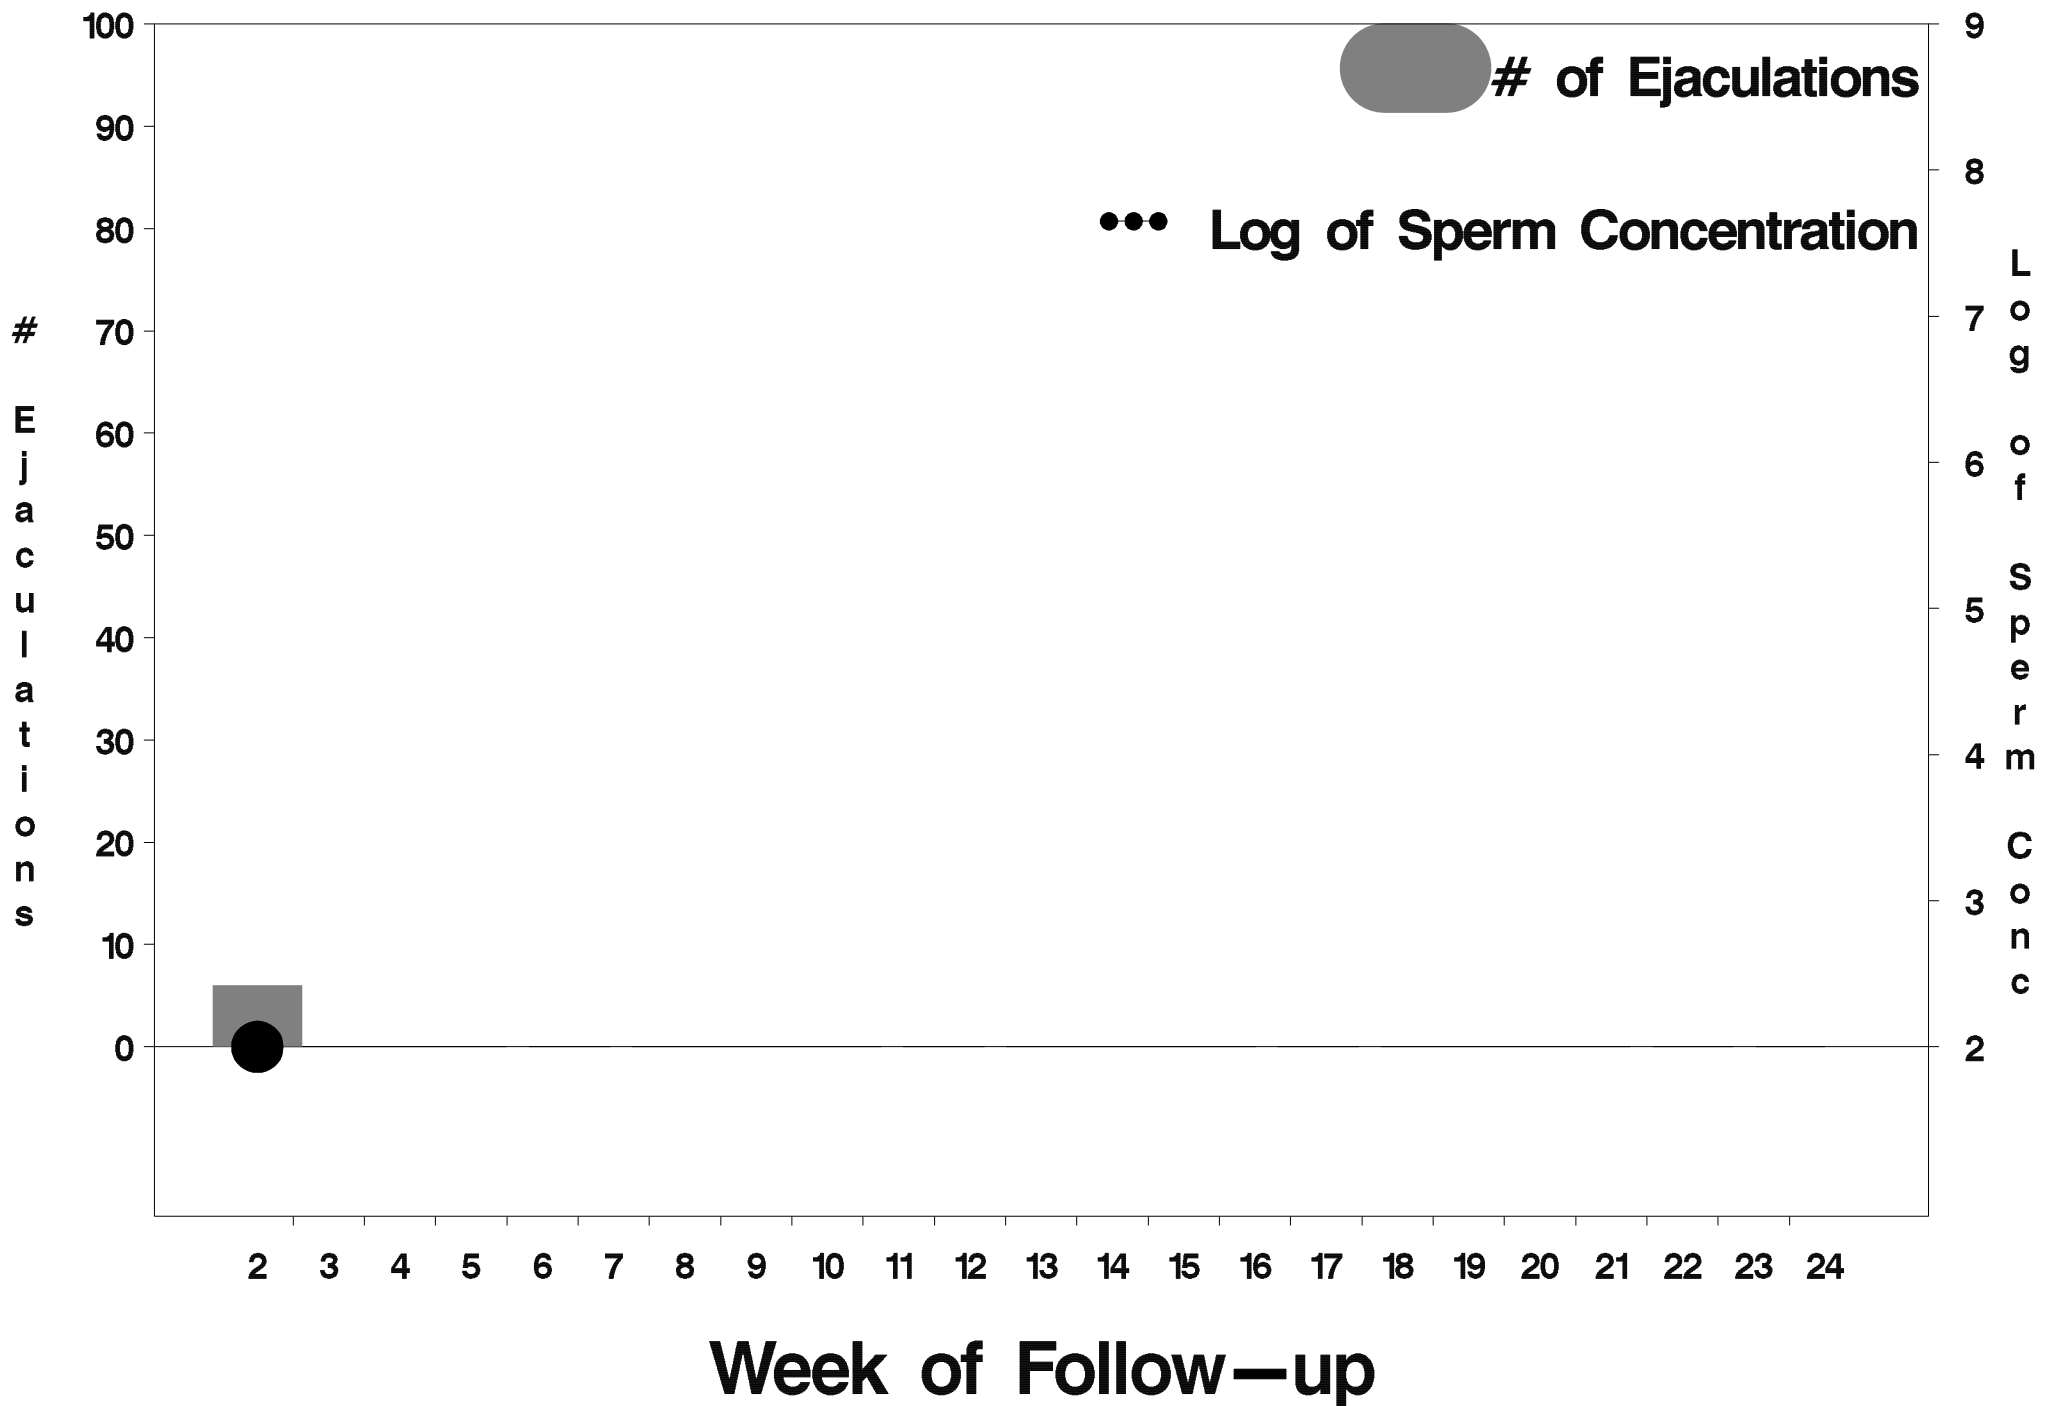

# Participant number= 798

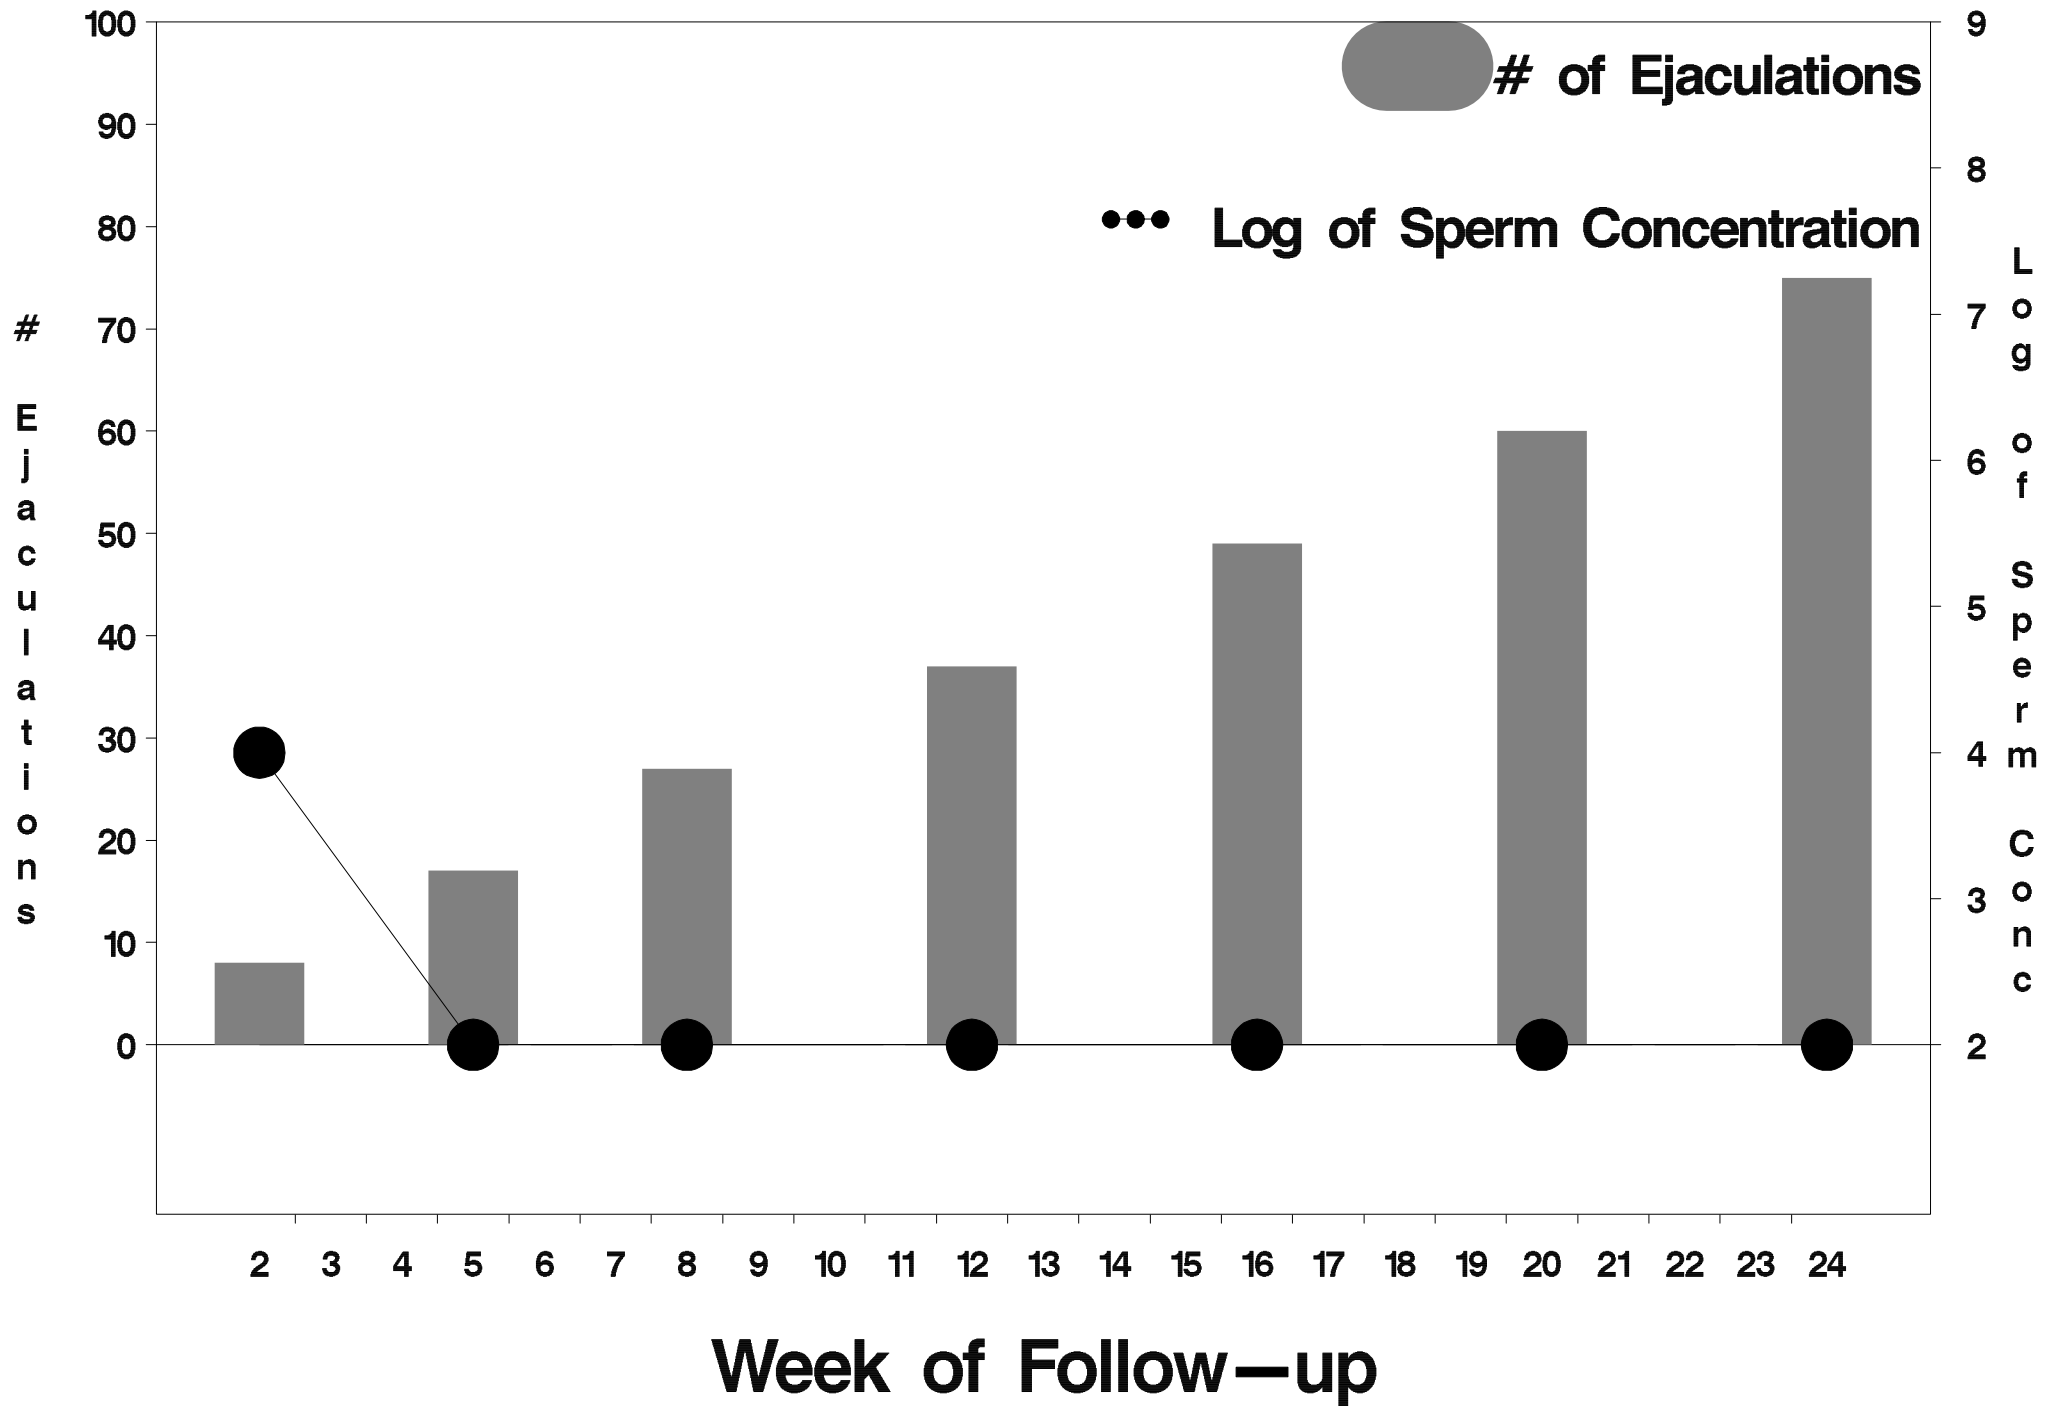

# Participant number= 799

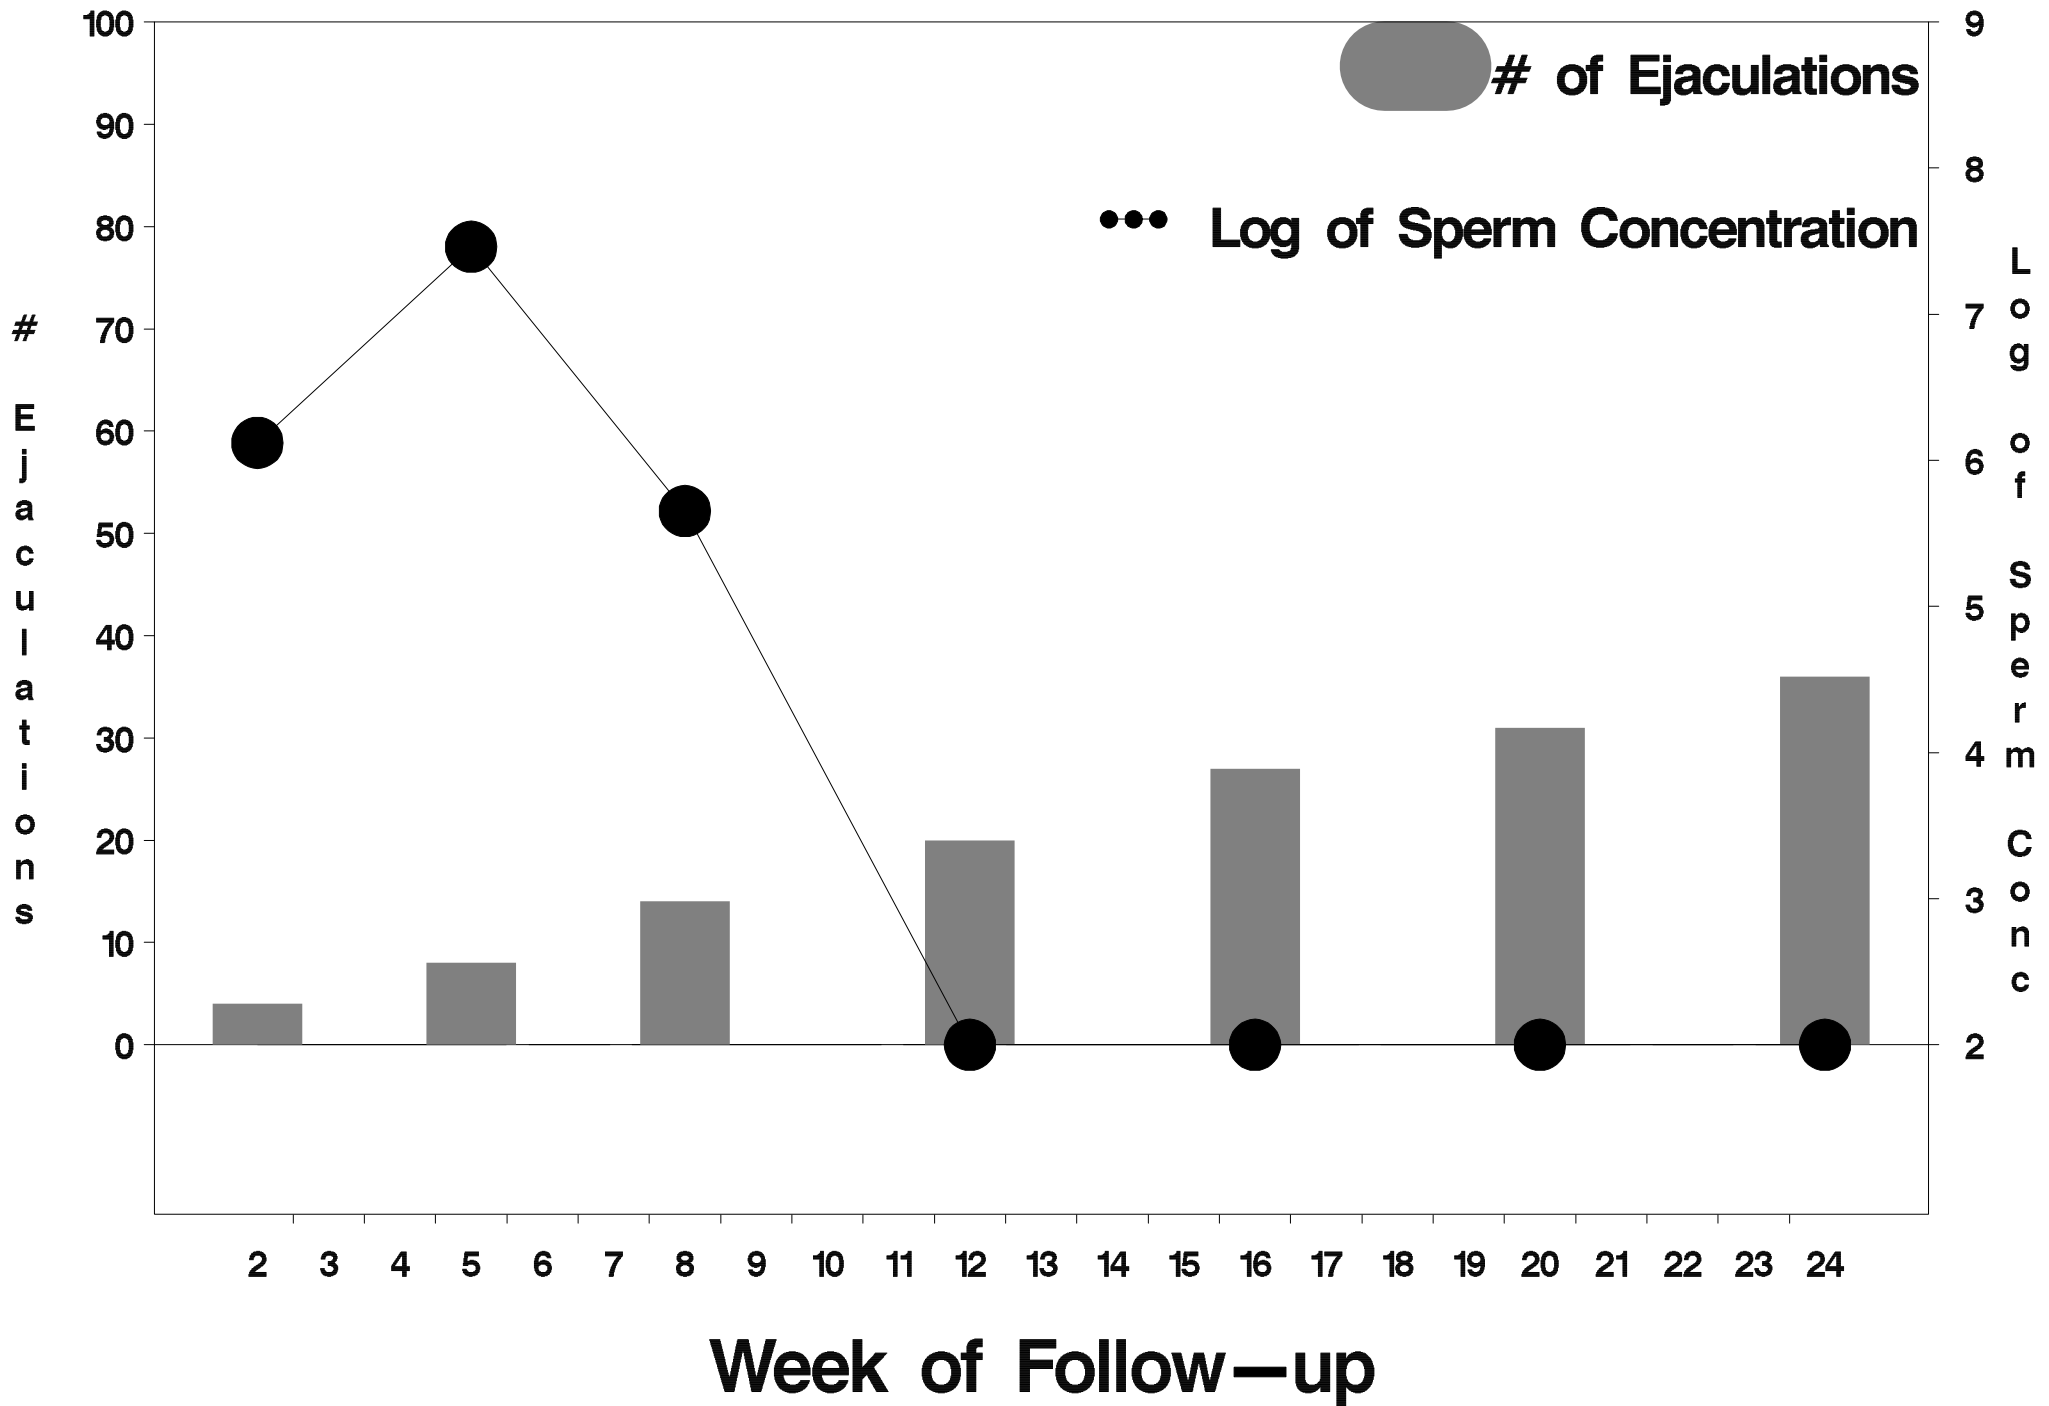

# Participant number= 800

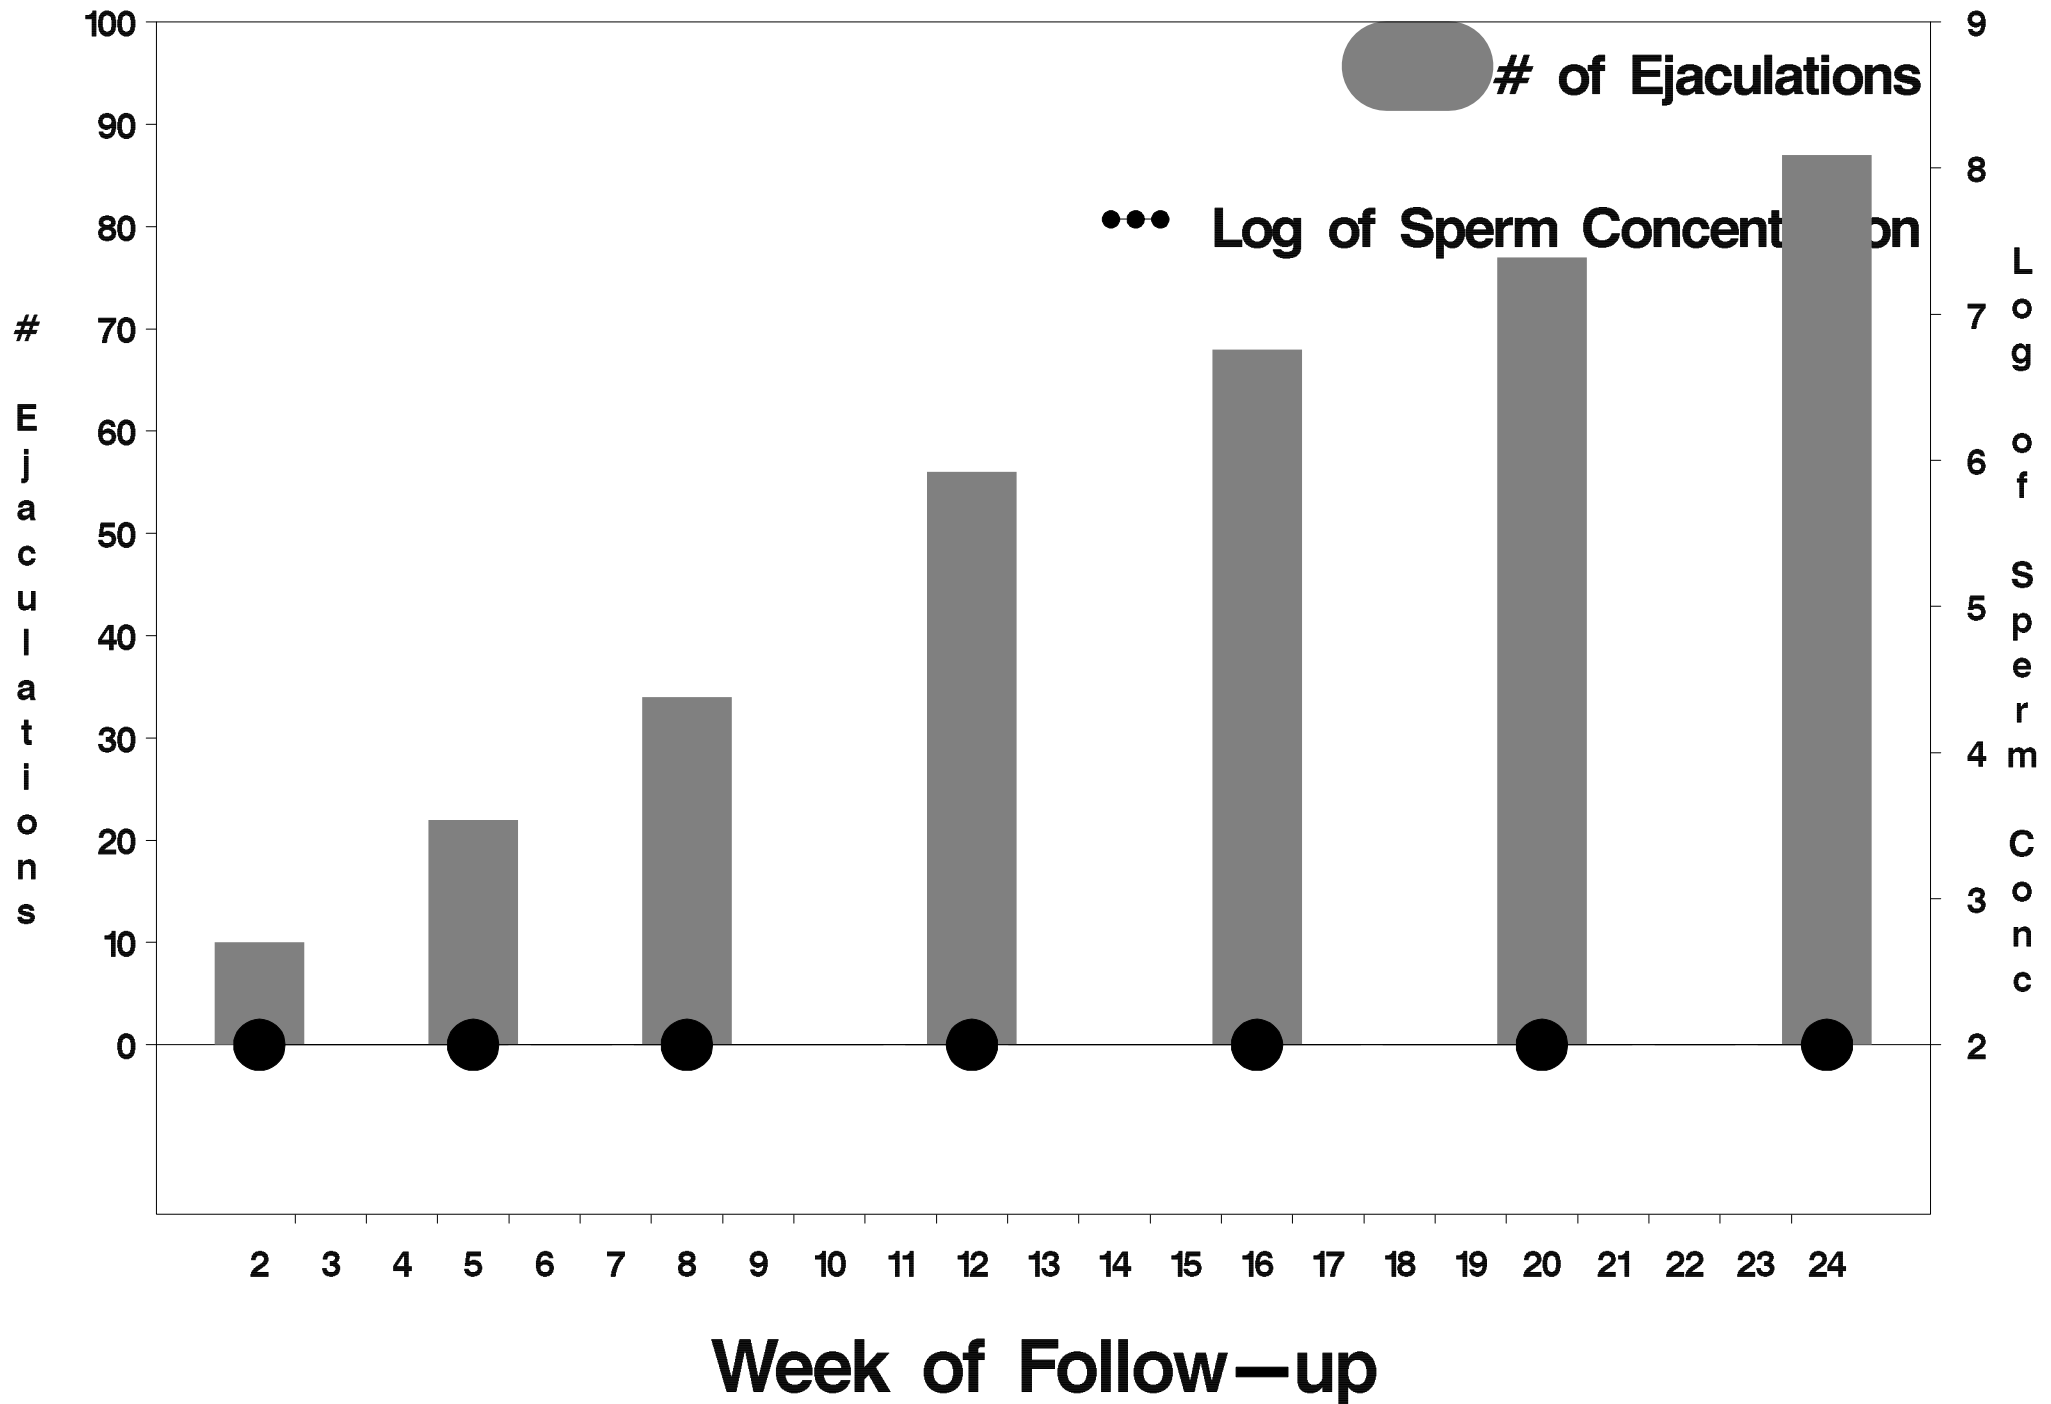

Supplement: MOESM3 [file 9513878]
